# Supplementary material for: The meningeal transcriptional response to traumatic brain injury and aging
Source: eLife. 2023 Jan 3;12:e81154. doi: 10.7554/eLife.81154 (PMC9810333; doi:10.7554/eLife.81154)
Supplement: Figure 1—figure supplement 1—source data 1. [file elife-81154-fig1-figsupp1-data1.xlsx]

## Sheet: Sheet1
Sham	TBI
4.608	4.075
3.867	4.032
2.431	3.827
3.169	2.527
2.483	4.217
