# Supplementary material for: The meningeal transcriptional response to traumatic brain injury and aging
Source: eLife. 2023 Jan 3;12:e81154. doi: 10.7554/eLife.81154 (PMC9810333; doi:10.7554/eLife.81154)
Supplement: Figure 1—figure supplement 1—source data 2. [file elife-81154-fig1-figsupp1-data2.xlsx]

## Sheet: Sheet1
GFAP			Iba1
Sham	24 hpi		Sham	24 hpi
0.374	0.487		0.105	1.088
0.441	2.416		0.456	1.092
0.249	0.874		0.696	0.21
0.225	0.698		0.663	0.376
	0.45			0.608
	0.698			0.775
