# Supplementary material for: The meningeal transcriptional response to traumatic brain injury and aging
Source: eLife. 2023 Jan 3;12:e81154. doi: 10.7554/eLife.81154 (PMC9810333; doi:10.7554/eLife.81154)
Supplement: Figure 1—figure supplement 1—source data 3. [file elife-81154-fig1-figsupp1-data3.xlsx]

## Sheet: Sheet1
Sham	TBI
1.991	3.078
4.235	6.874
2.47	4.253
3.008	4.321
2.622	4.226
4.258	3.07
1.62	3.018
2.591	5.518
