# Supplementary material for: The meningeal transcriptional response to traumatic brain injury and aging
Source: eLife. 2023 Jan 3;12:e81154. doi: 10.7554/eLife.81154 (PMC9810333; doi:10.7554/eLife.81154)
Supplement: Figure 1—source data 1. — Tables depicting the top 20 most significant cluster-defining genes for clusters 1–21. Raw data for top cluster defining genes for each cell population. [file elife-81154-fig1-data1.xlsx]

## Sheet: Sheet1
Activated Macs 1			Activated Macs 2			Macs 3			B Cells 1			B Cells 2			Immature/Diff B Cells			CD3+ T Cells			Activated T Cells			NK Cells			Dendritic Cells			Plasmacytoid Dendritic Cells			Neutrophils			Proliferating Cells			Fibroblasts			Endothelial Cells 1			Endothelial Cells 2			Pericytes
Gene	P_adj		Gene	P_adj		Gene	P_adj		Gene	P_adj		Gene	P_adj		Gene	P_adj		Gene	P_adj		Gene	P_adj		Gene	P_adj		Gene	P_adj		Gene	P_adj		Gene	P_adj		Gene	P_adj		Gene	P_adj		Gene	P_adj		Gene	P_adj		Gene	P_adj
C1qb	0		C1qa	1.69e-267		Apol7c	0		Ms4a1	0		Cd79a	5.12e-295		Rag1	0		Cd3g	0		Gata3	0		Gzma	0		Cd209a	0		Cox6a2	0		Retnlg	0		Mki67	0		Col1a1	0		Igfbp3	0		Vwf	0		Rgs5	0
C1qc	0		Pf4	3.75e-257		Cacnb3	0		Ly6d	0		Iglc2	5.77e-292		Cecr2	0		Cd3e	0		Rnf128	0		Nkg7	0		Plbd1	0		Siglech	0		Lcn2	0		Top2a	0		Igfbp5	0		Ly6c1	0		Lrg1	0		Notch3	0
C1qa	0		Cbr2	4.59e-253		Ccl22	0		Cd79a	0		Ighd	3.91e-282		Rag2	0		Cd3d	0		Il7r	1.8e-278		Gzmb	0		Cd209c	0		Klk1	0		Slpi	0		Pclaf	0		Col1a2	0		Plvap	0		Ptprb	3.41e-284		Abcc9	0
Lyz2	0		C1qc	1.35e-251		Nudt17	0		Cd79b	0		Fcmr	5.28e-281		Cplx2	1.72e-298		Ms4a4b	0		Il1rl1	5.87e-247		Ncr1	0		Olfm1	0		Ccr9	0		Hp	0		Cenpf	0		Dcn	0		Flt1	0		Clec14a	2.41e-282		Myh11	0
Csf1r	0		C1qb	5.57e-237		Gm13546	0		Igkc	0		Fcer2a	2.85e-276		AL611986.1	2.83e-293		Thy1	0		Skap1	2.61e-216		Prf1	0		Jaml	0		AC140186.1	0		Mmp8	0		Birc5	0		Slc38a2	0		Kdr	0		Slco2a1	6.38e-267		Ndufa4l2	0
Ctss	0		F13a1	1.38e-195		Gm10851	0		Iglc2	0		Ms4a1	1.87e-260		Gm37065	4.82e-277		Cxcr6	0		Cxcr6	3.34e-201		Klrb1c	0		Flt3	0		Gm21762	0		Cxcr2	0		Rrm2	0		Col12a1	0		Plpp1	0		Wipf3	1.57e-255		Higd1b	0
Ctsc	0		Lyz2	3.18e-177		Slco5a1	0		Iglc1	0		Cd79b	1.85e-221		Vpreb3	1.77e-269		Nkg7	0		Inpp4b	4.9e-196		Klre1	0		Mcemp1	1.08e-299		Cd300c	0		Ly6g	0		Ube2c	0		Mfap4	0		Emcn	0		Tgm2	1.67e-254		Rgs4	0
Lgmn	0		Apoe	8.48e-157		Mreg	0		Vpreb3	0		Ly6d	9.85e-221		Myb	3.91e-267		Ctsw	0		Tnfsf11	2.89e-158		Klra8	0		Skint3	1.81e-298		Klra17	0		Hdc	0		Ccnb2	0		Slc47a1	0		Rgcc	0		Flt1	1.28e-229		Gucy1b1	2.57e-289
Ms4a7	0		Ccl8	1.16e-148		Lad1	0		Tnfrsf13c	0		Iglc3	1.44e-205		Slc12a3	1.55e-254		Xcl1	0		Thy1	8.9e-158		Klra9	0		Lgals3	2.54e-280		Atp2a1	0		Hcar2	0		Cdca8	0		Serpinf1	0		Podxl	0		Egfl7	2.01e-229		Trpc3	2.11e-277
Hexb	0		Mrc1	5.64e-131		Il12b	3.12e-296		Iglc3	0		Igkc	5.27e-191		Xrcc6	1.53e-233		Hcst	0		Faah	1.25e-153		Klra4	0		Ear2	1.4e-271		Dntt	0		Padi4	0		Ccna2	0		Snhg11	0		Ptprb	0		Adgrg6	1.1e-221		Itga7	3.32e-266
Mrc1	0		Fcer1g	3.84e-130		H2-M2	2.19e-293		Cd24a	0		Cd55	4.09e-174		Arl5c	1.09e-207		Gimap3	0		Tespa1	8.07e-145		Klra7	0		Slamf7	5.67e-263		Foxr1	0		Trem3	0		Tpx2	0		Slc4a10	0		Gpihbp1	0		Nos3	4.73e-216		Steap4	1.62e-262
Cx3cr1	0		Ms4a7	5.96e-130		Gm47662	1.42e-274		Spib	0		Cd19	9.6e-166		Pou2af1	2.05e-206		Lck	0		Ltb4r1	5.18e-134		Klrc2	0		Dna2	7.81e-245		Sh3bgr	0		Cebpe	0		Cenpe	0		Sfrp4	0		Egfl7	0		Nrp2	8.75e-196		Rasl12	2.47e-258
Fcrls	0		Csf1r	2.62e-126		Arc	2.89e-257		Siglecg	0		H2-DMb2	3.26e-159		Myl4	2e-204		Il2rb	0		Il2ra	4.71e-132		Eomes	0		Lmo1	1.91e-242		Grm8	0		Itgb2l	0		Nusap1	0		Mgp	0		Igfbp7	0		Cavin2	1.74e-190		Ano1	1.12e-237
Fcgr3	0		Fcrls	2.45e-122		Tmem150c	4.64e-233		Fcmr	0		H2-Ob	1.35e-148		Fam129c	1.39e-199		Gimap4	0		Lat	8e-130		Klri2	0		Hepacam2	3.34e-236		Gm12253	0		Ankrd22	0		Knl1	0		Pcolce	0		Ly6a	0		Cldn5	6.7e-184		Kcnj8	1.12e-227
Mgl2	0		Ftl1	3.9e-122		Mmp25	4.31e-205		Cd19	0		Cd37	1.71e-144		Uchl1	9.52e-191		Lat	0		Gimap3	1.24e-117		S1pr5	0		Itgax	7.57e-235		Havcr1	0		Cd177	2.35e-259		Cdca3	0		Fbln1	0		Slc9a3r2	0		Fam174b	2.31e-178		Foxs1	3.69e-216
Cd68	0		Selenop	2.68e-108		Cacna1s	4.46e-204		Fcrla	0		Bank1	8.25e-139		Bach2	2.52e-189		Cxcr3	0		Bcl11b	2.06e-116		Gm19585	6.12e-298		H2-DMb1	1.56e-232		Pacsin1	7.6e-293		Chil1	9.41e-259		Aspm	0		Cdh11	0		Sparcl1	0		Cfh	8.64e-178		Cox4i2	2.84e-214
Pf4	0		Tyrobp	4.08e-108		Zmynd15	1.82e-187		Fam129c	0		Ighm	5.34e-123		Fcrla	8.19e-188		Skap1	0		Cish	1.79e-115		Ctsw	1.57e-277		Rtl5	1.05e-229		Lefty1	1.08e-292		Wfdc21	4.83e-238		Kif11	0		Col6a2	0		Scarb1	0		Mmrn2	4.39e-169		Rasl11a	2.19e-174
C3ar1	0		Stab1	2.42e-94		Bcl2l14	3.06e-177		Pax5	0		Cxcr5	4.08e-122		Bcl7a	2.76e-177		Trbc2	0		Ltb	8.29e-108		Adamts14	5.46e-277		Ltb4r1	7.19e-229		Ccdc162	6.99e-291		Mmp9	7.38e-232		Cdk1	0		Slc23a2	0		Tm4sf1	0		Gpr182	5.45e-168		Aspn	1.11e-156
Fcer1g	0		Folr2	9.74e-92		Il4i1	5.84e-169		Pou2af1	0		Siglecg	4.68e-119		Spns3	4.15e-170		Cd247	0		Icos	1.74e-107		Il2rb	2.67e-262		Ciita	4.96e-228		Pdzd4	7.4e-281		Trem1	5.82e-223		Pbk	0		Igfbp6	0		Pecam1	0		AU021092	1.38e-167		Pdgfrb	1.63e-156
Adgre1	0		Hpgd	2.65e-89		Cdkn2b	4.73e-168		Srpk3	0		Ebf1	7.44e-119		Pafah1b3	1.07e-168		Trac	0		Itk	1.94e-100		Ccl5	1.28e-258		Slamf8	4.69e-225		Cd209d	5.59e-264		Slfn4	2.79e-220		Spc24	0		Ank2	0		Hspb1	0		Tek	2.35e-166		Rem1	7.97e-155
*Each graph depicts top 20 cluster-defining genes
