# Supplementary material for: The meningeal transcriptional response to traumatic brain injury and aging
Source: eLife. 2023 Jan 3;12:e81154. doi: 10.7554/eLife.81154 (PMC9810333; doi:10.7554/eLife.81154)
Supplement: Figure 1—source data 2. [file elife-81154-fig1-data2.xlsx]

## Sheet: Sheet1
	sham count	TBI count	sham prop	TBI prop	p
Activated Macrophages 1	185	499	0.0905975	0.132396	<.00001
Activated Macrophages 2	199	319	0.0974535	0.0846378	0.101
Macrophages 3	24	31	0.0117532	0.00822499	0.18352
B Cells 1	217	172	0.106268	0.0456354	<.00001
B Cells 2	172	137	0.0842311	0.0363492	<.00001
Immature/Differentiating B Cells	63	92	0.0308521	0.0244097	0.1443
CD3+ T Cells	150	240	0.0734574	0.0636774	0.1556
Activated T Cells	148	169	0.072478	0.0448395	<.00001
NK Cells	68	55	0.0333007	0.0145927	<.00001
Dendritic Cells	131	200	0.0641528	0.0530645	0.08186
Plasmacytoid Dendritic Cells	18	42	0.00881489	0.0111435	0.4009
Neutrophils	16	26	0.00783546	0.00689838	0.68916
Proliferating Cells	36	58	0.0176298	0.0153887	0.5157
Fibroblasts	124	781	0.0607248	0.207217	<.00001
Endothelial Cells 1	235	380	0.115083	0.100822	0.09102
Endothelial Cells 2	78	199	0.0381978	0.0527992	0.01278
Pericytes	20	69	0.00979432	0.0183072	0.01174
Choroid Plexus	58	135	0.0284035	0.0358185	0.13104
Pineal Gland Cells	31	75	0.0151812	0.0198992	0.20054
Schwann Cells	35	47	0.0171401	0.0124702	0.14986
Clotting Related	34	43	0.0166503	0.0114089	0.09492
Total	2042	3769
