# Supplementary material for: The meningeal transcriptional response to traumatic brain injury and aging
Source: eLife. 2023 Jan 3;12:e81154. doi: 10.7554/eLife.81154 (PMC9810333; doi:10.7554/eLife.81154)
Supplement: Figure 2—figure supplement 2—source data 1. [file elife-81154-fig2-figsupp2-data1.xlsx]

## Sheet: Sheet1
test_ligand	auroc	aupr	aupr_corrected	pearson	rank
Tgfb1	0.583891	0.231253	0.0712706	0.123741	1
Itgam	0.582175	0.209341	0.0493585	0.105991	2
Apoe	0.566859	0.21737	0.0573876	0.103875	3
Copa	0.571512	0.21021	0.0502277	0.097339	4
Vcam1	0.564578	0.207435	0.0474529	0.0957514	5
Adam17	0.57257	0.204683	0.0447006	0.0945262	6
Selplg	0.565569	0.204352	0.0443699	0.0943653	7
Yars	0.564836	0.206464	0.046481	0.0923099	8
Nectin1	0.567101	0.201755	0.041772	0.0919126	9
Tnfsf13b	0.560073	0.202954	0.0429715	0.0913902	10
C3	0.567264	0.201024	0.0410417	0.0891621	11
Itgb1	0.56721	0.201058	0.0410757	0.0873313	12
Rps19	0.562982	0.204256	0.0442731	0.0861931	13
Col1a1	0.568448	0.196034	0.0360518	0.0854913	14
Adam9	0.56025	0.206827	0.0468446	0.0849059	15
Pkd1	0.559041	0.202857	0.0428743	0.0846636	16
Gmfb	0.565068	0.199364	0.0393818	0.0838997	17
Itgb2	0.565026	0.197626	0.0376439	0.083896	18
Anxa1	0.561314	0.198129	0.0381462	0.0833636	19
Sema4d	0.562832	0.198475	0.0384926	0.0814286	20
Itga4	0.565789	0.204746	0.0447633	0.0802473	21
Sema7a	0.558648	0.200744	0.0407616	0.0798483	22
Ccl8	0.55551	0.198237	0.0382542	0.0791459	23
Calm1	0.564068	0.19886	0.0388778	0.0758191	24
Ccl2	0.550779	0.196219	0.036236	0.0747355	25
Pros1	0.55387	0.195699	0.0357166	0.0741688	26
Ccl7	0.558202	0.19378	0.0337973	0.0736928	27
Ccl24	0.550855	0.194781	0.0347983	0.0731505	28
Ccl5	0.564176	0.199251	0.0392687	0.0729469	29
Cxcl16	0.557295	0.195723	0.0357401	0.0713051	30
Calm2	0.556481	0.197149	0.0371663	0.0710007	31
F11r	0.555177	0.192079	0.0320966	0.0708695	32
Rtn4	0.55785	0.197011	0.0370281	0.0706147	33
Plekho2	0.551993	0.194207	0.0342249	0.0703774	34
Il15	0.549089	0.19454	0.0345578	0.0701811	35
Ttr	0.545024	0.196207	0.036224	0.070127	36
Lgals3	0.554266	0.194322	0.0343394	0.0699981	37
Hmgb2	0.564614	0.205884	0.045901	0.0699325	38
L1cam	0.549946	0.1944	0.0344174	0.0692945	39
Arf1	0.548231	0.193852	0.0338697	0.0692541	40
Tnfsf13	0.552734	0.192526	0.0325437	0.0691925	41
Nampt	0.546982	0.193642	0.0336597	0.0683816	42
Cx3cl1	0.552347	0.192214	0.0322311	0.0682931	43
Hebp1	0.551494	0.191319	0.0313368	0.0682395	44
Efna2	0.553448	0.190931	0.0309488	0.0679991	45
Psen1	0.549985	0.194088	0.0341051	0.0668825	46
Gpi1	0.556198	0.192385	0.032402	0.0664881	47
App	0.565182	0.216741	0.0567585	0.0659393	48
Fbrs	0.546428	0.196337	0.0363544	0.065673	49
Ccl12	0.558874	0.196345	0.0363627	0.0656073	50
Icam1	0.550838	0.191689	0.0317061	0.0654597	51
Ptprc	0.546775	0.19209	0.0321071	0.0650158	52
Lrpap1	0.548219	0.192309	0.0323267	0.0649656	53
H2-T23	0.546734	0.191464	0.0314813	0.0648632	54
Nenf	0.548485	0.192047	0.0320643	0.0646541	55
Kitl	0.545943	0.191448	0.0314652	0.0645792	56
H2-M3	0.545237	0.19206	0.0320772	0.0643257	57
Pdgfa	0.543072	0.191304	0.031321	0.0632287	58
Hmgb1	0.551798	0.192656	0.0326731	0.0631882	59
Adm	0.541751	0.191713	0.0317302	0.0616323	60
Trf	0.546574	0.189866	0.0298839	0.0603603	61
Nucb2	0.542375	0.190639	0.0306568	0.0597761	62
Pdgfb	0.557212	0.195188	0.0352058	0.0591014	63
Grn	0.544588	0.185097	0.0251147	0.0588862	64
Esam	0.542933	0.186789	0.0268067	0.0565346	65
Pf4	0.545044	0.188501	0.0285185	0.0555012	66
Ltb	0.542866	0.185226	0.0252436	0.055195	67
Crlf2	0.538374	0.185553	0.0255705	0.0540782	68
Hsp90b1	0.535635	0.190482	0.0304992	0.0535134	69
Tslp	0.536671	0.186518	0.0265352	0.0533608	70
Aimp1	0.532815	0.18579	0.0258072	0.0474592	71
Cadm3	0.553902	0.186947	0.0269646	0.0450225	72
Manf	0.531891	0.179731	0.0197487	0.0405473	73
Igf1	0.552042	0.196177	0.0361946	0.0374905	74
Ebi3	0.53028	0.175726	0.0157431	0.0353356	75
Alcam	0.517067	0.176234	0.0162516	0.0313212	76
Plau	0.508098	0.175938	0.0159551	0.0306649	77
Psap	0.510101	0.177817	0.0178349	0.0291013	78
Adam15	0.515387	0.174083	0.0141	0.023807	79
Flrt3	0.519146	0.170311	0.0103289	0.0201699	80
Calr	0.558831	0.193283	0.0333009	0.0156464	81
Mif	0.549123	0.185083	0.0251006	0.012657	82
Sema6d	0.50228	0.167308	0.00732588	0.0101287	83
Ptdss1	0.502586	0.16751	0.00752732	0.00417924	84
