# Supplementary material for: The meningeal transcriptional response to traumatic brain injury and aging
Source: eLife. 2023 Jan 3;12:e81154. doi: 10.7554/eLife.81154 (PMC9810333; doi:10.7554/eLife.81154)
Supplement: Figure 2—source data 1. [file elife-81154-fig2-data1.xlsx]

## Sheet: Sheet1
Upregulated	Downregulated
321	-369
