# Supplementary material for: The meningeal transcriptional response to traumatic brain injury and aging
Source: eLife. 2023 Jan 3;12:e81154. doi: 10.7554/eLife.81154 (PMC9810333; doi:10.7554/eLife.81154)
Supplement: Figure 2—source data 2. [file elife-81154-fig2-data2.xlsx]

## Sheet: Sheet1
GO.ID	Description	p.Val	FDR	Phenotype	Genes
GO:0002376	immune system process	2.92757e-21	2.92757e-21	1	EGR1,IFIT3,IIGP1,FOS,CCL12,PARP14,TRF,KLF2,TSC22D3,ID2,ZFP36,PICALM,CCL9,AP2A2,CD81,CD74,BLNK,SLFN8,CD9,NRROS,H2-T23,IFI213,LAMP1,IL2RG,TAP1,C3AR1,VIM,IRF1,SP110,GBP7,C5AR1,RUNX1,RTP4,H2-D1,CLEC4A2,IRF2BP2,CD79B,MAFB,IGHM,BATF3,TCIRG1,ADGRE1,GPI1,IFI203,ZFP36L1,FYB,C1QC,CD48,PRDX2,CD14,MPP1,RHOA,PRDX1,H2-DMB1,C1QB,P2RX4,ITGB2,H2-K1,TGFBR1,PSAP,IFNGR1,CXCL16,ZFP36L2,ACTG1,PPIB,HMGB1,CCL6,VSIR,POU2…
GO:0006950	response to stress	1.99701e-17	1.99701e-17	1	EGR1,IFIT3,IIGP1,PLEC,IER3,FOS,CCL12,IGTP,PARP14,TRF,METRNL,KLF2,TSC22D3,ID2,ZFP36,CCL9,CD81,CD74,SLFN8,RHOB,CD9,NRROS,H2-T23,MT-ND1,MT-ND4,IFI213,LAMP1,ATP13A2,BCL2A1B,TAP1,C3AR1,FXYD2,VIM,IRF1,SP110,GBP7,C5AR1,RTP4,RNF13,CLEC4A2,YWHAE,HMOX2,DDX39B,TSPO,IGHM,ABCA1,TCIRG1,GPI1,LDHA,IFI203,ZFP36L1,UBE2B,C1QC,ANXA5,TAOK3,PRDX2,CD14,MT-ND3,FERMT3,STAB1,RHOA,SERPINB6A,PRDX1,TNFRSF1A,MT-ND5,DNM2,C1QB,…
GO:0070887	cellular response to chemical stimulus	2.04048e-14	2.04048e-14	1	IGFBP5,EGR1,IFIT3,IIGP1,FOS,CCL12,IGTP,PARP14,TRF,KLF2,ID2,ZFP36,CCL9,CD74,RHOB,NPTN,NRROS,IFI213,ATP13A2,IL2RG,C3AR1,FXYD2,VIM,IRF1,GBP7,C5AR1,ILK,TSPO,RASA4,ADIPOR1,ABCA1,TCIRG1,IFI203,ZFP36L1,ANXA5,PRDX2,CD14,MT-ND3,MPP1,RHOA,SERPINB6A,PRDX1,TNFRSF1A,LRP6,DNM2,P2RX4,ITGB2,UBE2I,TGFBR1,PSAP,IFNGR1,CXCL16,ZFP36L2,ACTG1,PPIB,FIS1,CSF2RA,HMGB1,CCL6,VSIR,SLC29A1,IFNAR1,TRA2B,CTSS,MNDAL,TWF2,MT1,JUN…
GO:0044419	interspecies interaction between organisms	8.36937e-14	8.36937e-14	1	IFIT3,IIGP1,FOS,CCL12,PARP14,TRF,ZFP36,CCL9,CD81,CD74,SLFN8,H2-T23,IFI213,RAB7,LAMP1,TAP1,VIM,IRF1,SP110,GBP7,C5AR1,RTP4,CLEC4A2,CD79B,FAM46A,DDX39B,TSPO,IGHM,BATF3,ABCA1,SPCS1,IFI203,C1QC,PRDX2,CD14,STAB1,RHOA,PRDX1,TNFRSF1A,C1QB,UBE2I,H2-K1,IFNGR1,CXCL16,ACTG1,PPIB,HMGB1,CCL6,POU2F2,IFNAR1,MNDAL,JUN,P4HB,GSN,SLFN2,PCBP2,PTPRC,CD37,OAS1A,ZYX,PRKCD,EIF2AK2,GPX1,CIITA,NFKBIA,CD52,CD68,LY86,RAB14,S…
GO:0051707	response to other organism	1.05026e-12	1.05026e-12	1	IFIT3,IIGP1,FOS,CCL12,PARP14,TRF,ZFP36,CCL9,CD74,SLFN8,H2-T23,IFI213,LAMP1,TAP1,VIM,IRF1,SP110,GBP7,C5AR1,RTP4,CLEC4A2,CD79B,FAM46A,TSPO,IGHM,BATF3,ABCA1,IFI203,C1QC,PRDX2,CD14,STAB1,RHOA,PRDX1,TNFRSF1A,C1QB,H2-K1,IFNGR1,CXCL16,ACTG1,HMGB1,CCL6,POU2F2,IFNAR1,MNDAL,JUN,GSN,SLFN2,PCBP2,PTPRC,CD37,OAS1A,ZYX,PRKCD,EIF2AK2,GPX1,CIITA,NFKBIA,CD52,CD68,LY86,RAB14,SYK,FCER1G,TNFAIP8L2,G3BP2,PRPF8
GO:0043207	response to external biotic stimulus	1.15419e-12	1.15419e-12	1	IFIT3,IIGP1,FOS,CCL12,PARP14,TRF,ZFP36,CCL9,CD74,SLFN8,H2-T23,IFI213,LAMP1,TAP1,VIM,IRF1,SP110,GBP7,C5AR1,RTP4,CLEC4A2,CD79B,FAM46A,TSPO,IGHM,BATF3,ABCA1,IFI203,C1QC,PRDX2,CD14,STAB1,RHOA,PRDX1,TNFRSF1A,C1QB,H2-K1,IFNGR1,CXCL16,ACTG1,HMGB1,CCL6,POU2F2,IFNAR1,MNDAL,JUN,GSN,SLFN2,PCBP2,PTPRC,CD37,OAS1A,ZYX,PRKCD,EIF2AK2,GPX1,CIITA,NFKBIA,CD52,CD68,LY86,RAB14,SYK,FCER1G,TNFAIP8L2,G3BP2,PRPF8
GO:0009607	response to biotic stimulus	3.1084e-12	3.1084e-12	1	IFIT3,IIGP1,FOS,CCL12,PARP14,TRF,ZFP36,CCL9,CD74,SLFN8,H2-T23,IFI213,LAMP1,TAP1,VIM,IRF1,SP110,GBP7,C5AR1,RTP4,CLEC4A2,CD79B,FAM46A,TSPO,IGHM,BATF3,ABCA1,IFI203,C1QC,PRDX2,CD14,STAB1,RHOA,PRDX1,TNFRSF1A,C1QB,H2-K1,IFNGR1,CXCL16,ACTG1,HMGB1,CCL6,POU2F2,IFNAR1,MNDAL,JUN,GSN,SLFN2,PCBP2,PTPRC,CD37,OAS1A,ZYX,PRKCD,EIF2AK2,GPX1,CIITA,NFKBIA,CD52,CD68,LY86,RAB14,SYK,FCER1G,TNFAIP8L2,G3BP2,PRPF8
GO:0034097	response to cytokine	4.46772e-12	4.46772e-12	1	EGR1,IFIT3,IIGP1,FOS,CCL12,IGTP,PARP14,XAF1,KLF2,ZFP36,CCL9,CD74,IFI213,IL2RG,VIM,IRF1,GBP7,ILK,ADIPOR1,ABCA1,TCIRG1,IFI203,ZFP36L1,CD14,RHOA,TNFRSF1A,IFNGR1,CXCL16,ZFP36L2,ACTG1,CSF2RA,HMGB1,CCL6,IFNAR1,MNDAL,JUN,DDOST,WNK1,P4HB,TPR,GSN,IL10RA,PTPRC,ZYX,EIF2AK2,CIITA,NFKBIA,SYK,FCER1G,PRPF8
GO:0002682	regulation of immune system process	6.91016e-12	6.91016e-12	1	FOS,CCL12,PARP14,TSC22D3,ID2,ZFP36,AP2A2,CD81,CD74,BLNK,CD9,H2-T23,IFI213,LAMP1,IL2RG,TAP1,C3AR1,IRF1,C5AR1,RUNX1,H2-D1,CD79B,MAFB,GPI1,IFI203,ZFP36L1,FYB,C1QC,CD48,PRDX2,MPP1,RHOA,C1QB,P2RX4,ITGB2,H2-K1,ZFP36L2,HMGB1,VSIR,MNDAL,JUN,NME2,WNK1,PRELID1,LGMN,GSN,PCBP2,PTPRC,CD37,TMEM176A,EIF2AK2,GPX1,GNAS,NFKBIA,PTPRE,TMEM176B,CD68,INPP5D,SYK,FCER1G,TNFAIP8L2,CALR
GO:0071310	cellular response to organic substance	1.05857e-11	1.05857e-11	1	IGFBP5,EGR1,IFIT3,IIGP1,FOS,CCL12,IGTP,PARP14,KLF2,ZFP36,CCL9,CD74,NPTN,NRROS,IFI213,IL2RG,VIM,IRF1,GBP7,ILK,TSPO,ADIPOR1,ABCA1,TCIRG1,IFI203,ZFP36L1,ANXA5,PRDX2,CD14,MT-ND3,RHOA,TNFRSF1A,LRP6,DNM2,P2RX4,UBE2I,TGFBR1,PSAP,IFNGR1,CXCL16,ZFP36L2,ACTG1,FIS1,CSF2RA,HMGB1,CCL6,VSIR,SLC29A1,IFNAR1,TRA2B,CTSS,MNDAL,TWF2,MT1,JUN,NME2,WNK1,YWHAH,ATP2B1,P4HB,TPR,LGMN,GSN,IL10RA,PTPRC,CANX,ZYX,PRKCD,EIF2AK2…
GO:0010033	response to organic substance	1.67789e-11	1.67789e-11	1	IGFBP5,EGR1,IFIT3,IIGP1,FOS,CCL12,IGTP,PARP14,XAF1,KLF2,ZFP36,CCL9,CD81,CD74,NPTN,CD9,NRROS,MT-ND1,MT-ND4,IFI213,IL2RG,VIM,IRF1,IER2,SLC3A2,GBP7,C5AR1,ILK,TSPO,ADIPOR1,ABCA1,TCIRG1,GPI1,LDHA,IFI203,ZFP36L1,ANXA5,PRDX2,CD14,MT-ND3,RHOA,TNFRSF1A,MT-ND5,LRP6,DNM2,P2RX4,UBE2I,TGFBR1,EEF1B2,PSAP,IFNGR1,CXCL16,ZFP36L2,ACTG1,FIS1,CSF2RA,MT-CYTB,HMGB1,CCL6,VSIR,SLC29A1,IFNAR1,TRA2B,CTSS,MNDAL,TWF2,MT1,JU…
GO:0002521	leukocyte differentiation	2.12221e-11	2.12221e-11	1	EGR1,FOS,TRF,ID2,CD81,CD74,NRROS,IL2RG,IRF1,RUNX1,IRF2BP2,CD79B,MAFB,BATF3,TCIRG1,ZFP36L1,C1QC,PRDX2,RHOA,PSAP,ZFP36L2,HMGB1,VSIR,POU2F2,JUN,NME2,PRELID1,PTPRC,TMEM176A,SEMA4A,PREX1,WWP1,GNAS,TMEM176B,INPP5D,SYK,FCER1G
GO:0002520	immune system development	2.58795e-11	2.58795e-11	1	EGR1,FOS,TRF,KLF2,ID2,ZFP36,PICALM,AP2A2,CD81,CD74,NRROS,H2-T23,IL2RG,C3AR1,IRF1,RUNX1,IRF2BP2,CD79B,MAFB,BATF3,TCIRG1,ZFP36L1,C1QC,PRDX2,RHOA,TGFBR1,PSAP,ZFP36L2,HMGB1,VSIR,POU2F2,JUN,TCEA1,NME2,WDR1,PRELID1,PTPRC,TMEM176A,SEMA4A,EIF2AK2,PREX1,KMT2E,WWP1,GNAS,NFKBIA,TMEM176B,INPP5D,PRRC2C,SYK,FCER1G
GO:0030097	hemopoiesis	2.75987e-11	2.75987e-11	1	EGR1,FOS,TRF,KLF2,ID2,ZFP36,PICALM,AP2A2,CD81,CD74,NRROS,IL2RG,IRF1,RUNX1,IRF2BP2,CD79B,MAFB,BATF3,TCIRG1,ZFP36L1,C1QC,PRDX2,RHOA,PSAP,ZFP36L2,HMGB1,VSIR,POU2F2,JUN,TCEA1,NME2,WDR1,PRELID1,PTPRC,TMEM176A,SEMA4A,EIF2AK2,PREX1,KMT2E,WWP1,GNAS,NFKBIA,TMEM176B,INPP5D,PRRC2C,SYK,FCER1G
GO:0048534	hematopoietic or lymphoid organ development	4.32497e-11	4.32497e-11	1	EGR1,FOS,TRF,KLF2,ID2,ZFP36,PICALM,AP2A2,CD81,CD74,NRROS,IL2RG,IRF1,RUNX1,IRF2BP2,CD79B,MAFB,BATF3,TCIRG1,ZFP36L1,C1QC,PRDX2,RHOA,TGFBR1,PSAP,ZFP36L2,HMGB1,VSIR,POU2F2,JUN,TCEA1,NME2,WDR1,PRELID1,PTPRC,TMEM176A,SEMA4A,EIF2AK2,PREX1,KMT2E,WWP1,GNAS,NFKBIA,TMEM176B,INPP5D,PRRC2C,SYK,FCER1G
GO:0009605	response to external stimulus	1.07815e-10	1.07815e-10	1	IFIT3,IIGP1,PLEC,FOS,CCL12,PARP14,TRF,METRNL,ID2,ZFP36,CCL9,CD81,CD74,SLFN8,NPTN,CD9,H2-T23,IFI213,LAMP1,TAP1,C3AR1,VIM,IRF1,SP110,GBP7,C5AR1,RTP4,CLEC4A2,CD79B,FAM46A,TSPO,IGHM,BATF3,ABCA1,GPI1,LDHA,IFI203,C1QC,ANXA5,PRDX2,CD14,MPP1,STAB1,RHOA,PRDX1,TNFRSF1A,C1QB,P2RX4,ITGB2,H2-K1,IFNGR1,CXCL16,ACTG1,PPIB,MT-CYTB,HMGB1,CCL6,POU2F2,IFNAR1,CTSS,MNDAL,JUN,WNK1,ALOX5AP,ATP2B1,LGMN,GSN,SLFN2,PCBP2,PT…
GO:0006952	defense response	8.47633e-10	8.47633e-10	1	IFIT3,IIGP1,CCL12,IGTP,PARP14,METRNL,ZFP36,CCL9,CD81,CD74,SLFN8,NRROS,H2-T23,IFI213,LAMP1,TAP1,C3AR1,VIM,IRF1,SP110,GBP7,C5AR1,RTP4,CLEC4A2,IGHM,TCIRG1,IFI203,C1QC,PRDX2,CD14,STAB1,PRDX1,TNFRSF1A,C1QB,ITGB2,H2-K1,IFNGR1,CXCL16,ACTG1,HMGB1,CCL6,IFNAR1,CTSS,MNDAL,JUN,ALOX5AP,GSN,PCBP2,PTPRC,CD37,OAS1A,ZYX,PRKCD,EIF2AK2,GPX1,ALDH2,CIITA,NFKBIA,CD68,LY86,RAB14,SYK,FCER1G,TNFAIP8L2,G3BP2
GO:0071345	cellular response to cytokine stimulus	9.92331e-10	9.92331e-10	1	EGR1,IFIT3,IIGP1,CCL12,IGTP,PARP14,KLF2,ZFP36,CCL9,CD74,IFI213,IL2RG,VIM,IRF1,GBP7,ILK,ADIPOR1,ABCA1,TCIRG1,IFI203,ZFP36L1,RHOA,TNFRSF1A,IFNGR1,ZFP36L2,ACTG1,CSF2RA,HMGB1,CCL6,IFNAR1,MNDAL,WNK1,P4HB,TPR,GSN,IL10RA,PTPRC,ZYX,CIITA,NFKBIA,SYK,FCER1G,PRPF8
GO:0006955	immune response	1.72093e-09	1.72093e-09	1	IFIT3,IIGP1,CCL12,PARP14,CCL9,CD81,CD74,BLNK,NRROS,H2-T23,IFI213,LAMP1,TAP1,C3AR1,VIM,IRF1,SP110,GBP7,C5AR1,H2-D1,CLEC4A2,CD79B,IGHM,TCIRG1,ADGRE1,IFI203,FYB,C1QC,CD48,CD14,PRDX1,H2-DMB1,C1QB,ITGB2,H2-K1,CXCL16,ACTG1,HMGB1,CCL6,VSIR,POU2F2,IFNAR1,CTSS,MNDAL,H2-DMA,WNK1,GSN,PCBP2,PTPRC,CD37,OAS1A,SEMA4A,ZYX,PRKCD,EIF2AK2,GPX1,CIITA,CD68,INPP5D,LY86,SYK,FCER1G,TNFAIP8L2,G3BP2
GO:0001775	cell activation	3.71968e-09	3.71968e-09	1	EGR1,ID2,CD81,CD74,BLNK,CD9,H2-T23,LAMP1,IL2RG,IRF1,C5AR1,CLEC4A2,IRF2BP2,CD79B,MAFB,BATF3,TCIRG1,ZFP36L1,CD48,PRDX2,FERMT3,RHOA,PRDX1,ITGB2,TGFBR1,PSAP,IFNGR1,ZFP36L2,HMGB1,VSIR,POU2F2,IFNAR1,JUN,DDOST,PRELID1,GSN,PTPRC,CD37,SEMA4A,PRKCD,PREX1,KMT2E,WWP1,GNAS,PTPRE,INPP5D,SYK,FCER1G,TNFAIP8L2
GO:0045321	leukocyte activation	1.24077e-08	1.24077e-08	1	EGR1,ID2,CD81,CD74,BLNK,H2-T23,LAMP1,IL2RG,IRF1,C5AR1,CLEC4A2,IRF2BP2,CD79B,MAFB,BATF3,TCIRG1,ZFP36L1,CD48,PRDX2,RHOA,PRDX1,ITGB2,PSAP,IFNGR1,ZFP36L2,HMGB1,VSIR,POU2F2,IFNAR1,JUN,DDOST,PRELID1,GSN,PTPRC,CD37,SEMA4A,PRKCD,PREX1,KMT2E,WWP1,PTPRE,INPP5D,SYK,FCER1G,TNFAIP8L2
GO:0010941	regulation of cell death	1.42155e-08	1.42155e-08	1	EGR1,IFIT3,IER3,FOS,CCL12,DEGS1,SLC6A6,TSC22D3,ZFP36,PICALM,CD74,RHOB,BCL2A1B,IRF1,SP110,C5AR1,ILK,TSPO,GPI1,LDHA,ZFP36L1,UBE2B,ANXA5,PRDX2,RHOA,TNFRSF1A,LRP6,TGFBR1,PSAP,FIS1,VDAC2,HMGB1,GRINA,CYCS,UBB,MT1,JUN,NME2,ERP29,YWHAH,PRELID1,P4HB,PEA15A,LGMN,GSN,ARL6IP1,PTPRC,PRKCD,EIF2AK2,SON,GPX1,ALDH2,PPP1CA,SH3GLB1,INPP5D,SERBP1,GNAI2,SYK,MT-CO2,FCER1G,ATP6V0C,TNFAIP8L2,SPOP,TOMM22
GO:0008219	cell death	1.69326e-08	1.69326e-08	1	EGR1,IFIT3,IER3,FOS,CCL12,XAF1,DEGS1,SLC6A6,TSC22D3,ZFP36,PICALM,NISCH,CD74,RHOB,LAMP1,BCL2A1B,IRF1,SP110,C5AR1,ILK,TSPO,TCIRG1,GPI1,LDHA,ZFP36L1,UBE2B,ANXA5,PRDX2,RHOA,TNFRSF1A,LRP6,P2RX4,TGFBR1,PSAP,FIS1,VDAC2,HMGB1,GRINA,CYCS,UBB,MT1,JUN,NME2,ERP29,YWHAH,PRELID1,P4HB,EMP3,PEA15A,LGMN,GSN,ARL6IP1,PTPRC,PRKCD,EIF2AK2,SON,GPX1,ALDH2,SHISA5,PPP1CA,SH3GLB1,INPP5D,SERBP1,GNAI2,CRIP1,SYK,MT-CO2,FCER1…
GO:0065008	regulation of biological quality	1.71129e-08	1.71129e-08	1	IGFBP5,EGR1,CCL12,TRF,PRPF40A,METRNL,KLF2,TSC22D3,ID2,ZFP36,PICALM,APLP2,NISCH,CD81,CD74,RHOB,NPTN,CD9,NRROS,RAB7,LAMP1,ATP13A2,CAPG,C3AR1,VIM,C5AR1,RAB11A,YWHAE,HMOX2,HEXB,ILK,FAM46A,MAFB,DPM3,TSPO,ADIPOR1,ABCA1,TCIRG1,GPI1,ZFP36L1,UBE2B,SCPEP1,ANXA5,PRDX2,FERMT3,RHOA,PRDX1,LRP6,DNM2,P2RX4,ZFP36L2,PPIB,FIS1,HMGB1,GRINA,SLC29A1,TRA2B,CTSS,UBB,TWF2,MT1,JUN,TCEA1,DDOST,NME2,WNK1,WDR1,YWHAH,ATP2B1,P…
GO:0098542	defense response to other organism	1.94736e-08	1.94736e-08	1	IFIT3,IIGP1,CCL12,PARP14,CCL9,CD74,SLFN8,H2-T23,IFI213,LAMP1,TAP1,VIM,IRF1,SP110,GBP7,C5AR1,RTP4,CLEC4A2,IGHM,IFI203,C1QC,CD14,STAB1,PRDX1,TNFRSF1A,C1QB,H2-K1,IFNGR1,CXCL16,ACTG1,HMGB1,CCL6,IFNAR1,MNDAL,GSN,PCBP2,PTPRC,CD37,OAS1A,ZYX,PRKCD,EIF2AK2,CIITA,LY86,RAB14,SYK,FCER1G,TNFAIP8L2,G3BP2
GO:0010035	response to inorganic substance	3.98448e-08	3.98448e-08	1	FOS,TRF,KLF2,ID2,RHOB,CD9,ATP13A2,TSPO,RASA4,TCIRG1,GPI1,LDHA,ANXA5,PRDX2,CD14,PRDX1,MT-ND5,DNM2,P2RX4,PSAP,MT-CYTB,MT-CO1,MT1,JUN,WNK1,ALOX5AP,LGMN,GSN,PRKCD,GPX1,PPP1CA,CRIP1,CALM3,CALR
GO:1903706	regulation of hemopoiesis	1.28678e-07	1.28678e-07	1	FOS,ID2,ZFP36,AP2A2,CD74,IL2RG,IRF1,RUNX1,MAFB,ZFP36L1,C1QC,PRDX2,RHOA,ZFP36L2,HMGB1,VSIR,JUN,NME2,PRELID1,PTPRC,TMEM176A,EIF2AK2,GNAS,NFKBIA,TMEM176B,INPP5D,SYK
GO:1902105	regulation of leukocyte differentiation	1.3286e-07	1.3286e-07	1	FOS,ID2,CD74,IL2RG,IRF1,RUNX1,MAFB,ZFP36L1,C1QC,PRDX2,RHOA,ZFP36L2,HMGB1,VSIR,JUN,NME2,PRELID1,PTPRC,TMEM176A,GNAS,TMEM176B,INPP5D,SYK
GO:0012501	programmed cell death	2.58459e-07	2.58459e-07	1	EGR1,IFIT3,IER3,CCL12,XAF1,DEGS1,TSC22D3,ZFP36,NISCH,CD74,RHOB,LAMP1,BCL2A1B,IRF1,SP110,C5AR1,ILK,TSPO,TCIRG1,GPI1,LDHA,ZFP36L1,UBE2B,ANXA5,PRDX2,RHOA,TNFRSF1A,LRP6,P2RX4,TGFBR1,FIS1,VDAC2,HMGB1,GRINA,CYCS,UBB,MT1,JUN,NME2,ERP29,YWHAH,PRELID1,P4HB,PEA15A,LGMN,GSN,ARL6IP1,PTPRC,PRKCD,EIF2AK2,SON,GPX1,ALDH2,SHISA5,PPP1CA,SH3GLB1,INPP5D,SERBP1,GNAI2,CRIP1,SYK,FCER1G,ATP6V0C,TNFAIP8L2,SPOP,TOMM22
GO:0043067	regulation of programmed cell death	2.72836e-07	2.72836e-07	1	EGR1,IFIT3,IER3,CCL12,DEGS1,TSC22D3,ZFP36,CD74,RHOB,BCL2A1B,SP110,C5AR1,ILK,TSPO,GPI1,LDHA,ZFP36L1,UBE2B,ANXA5,PRDX2,RHOA,TNFRSF1A,LRP6,TGFBR1,FIS1,VDAC2,HMGB1,GRINA,CYCS,UBB,MT1,JUN,NME2,ERP29,YWHAH,PRELID1,P4HB,PEA15A,LGMN,GSN,ARL6IP1,PTPRC,PRKCD,EIF2AK2,SON,GPX1,ALDH2,PPP1CA,SH3GLB1,INPP5D,SERBP1,GNAI2,SYK,FCER1G,ATP6V0C,TNFAIP8L2,SPOP,TOMM22
GO:0006915	apoptotic process	2.77915e-07	2.77915e-07	1	EGR1,IFIT3,IER3,CCL12,XAF1,DEGS1,TSC22D3,ZFP36,NISCH,CD74,RHOB,LAMP1,BCL2A1B,IRF1,SP110,C5AR1,ILK,TSPO,TCIRG1,GPI1,LDHA,ZFP36L1,UBE2B,ANXA5,PRDX2,RHOA,TNFRSF1A,LRP6,P2RX4,TGFBR1,FIS1,VDAC2,HMGB1,GRINA,CYCS,UBB,MT1,JUN,NME2,ERP29,YWHAH,PRELID1,P4HB,PEA15A,LGMN,GSN,ARL6IP1,PTPRC,PRKCD,EIF2AK2,SON,GPX1,ALDH2,SHISA5,PPP1CA,SH3GLB1,INPP5D,SERBP1,GNAI2,CRIP1,SYK,FCER1G,TNFAIP8L2,SPOP,TOMM22
GO:0048583	regulation of response to stimulus	3.58066e-07	3.58066e-07	1	IGFBP5,EGR1,IER3,CCL12,PARP14,TRF,METRNL,KLF2,ZFP36,APLP2,CCL9,CD81,CD74,BLNK,NPTN,CD9,NRROS,H2-T23,IFI213,RAB7,LAMP1,TAP1,C3AR1,IRF1,C5AR1,RNF13,H2-D1,DOK2,STARD8,CD79B,ILK,DDX39B,RASA4,ADIPOR1,ABCA1,IFI203,FYB,UBE2B,C1QC,ANXA5,TAOK3,CD48,PRDX2,CD14,MPP1,RHOA,PRDX1,TNFRSF1A,DNM2,C1QB,P2RX4,ITGB2,UBE2I,H2-K1,TGFBR1,PSAP,IFNGR1,ACTG1,FIS1,VDAC2,HMGB1,CCL6,VSIR,GRINA,CTSS,MNDAL,UBB,JUN,WNK1,ALOX5AP…
GO:0042981	regulation of apoptotic process	4.29589e-07	4.29589e-07	1	EGR1,IFIT3,IER3,CCL12,DEGS1,TSC22D3,ZFP36,CD74,RHOB,BCL2A1B,SP110,C5AR1,ILK,TSPO,GPI1,LDHA,ZFP36L1,UBE2B,ANXA5,PRDX2,RHOA,TNFRSF1A,LRP6,TGFBR1,FIS1,VDAC2,HMGB1,GRINA,CYCS,UBB,MT1,JUN,NME2,ERP29,YWHAH,PRELID1,P4HB,PEA15A,LGMN,GSN,ARL6IP1,PTPRC,PRKCD,EIF2AK2,SON,GPX1,ALDH2,PPP1CA,SH3GLB1,INPP5D,SERBP1,GNAI2,SYK,FCER1G,TNFAIP8L2,SPOP,TOMM22
GO:0046649	lymphocyte activation	4.60529e-07	4.60529e-07	1	EGR1,ID2,CD81,CD74,BLNK,H2-T23,LAMP1,IL2RG,IRF1,CLEC4A2,IRF2BP2,CD79B,MAFB,TCIRG1,ZFP36L1,CD48,PRDX2,RHOA,PRDX1,ITGB2,PSAP,ZFP36L2,HMGB1,VSIR,POU2F2,IFNAR1,DDOST,PRELID1,GSN,PTPRC,SEMA4A,PRKCD,PREX1,WWP1,INPP5D,SYK,FCER1G,TNFAIP8L2
GO:0042221	response to chemical	6.8178e-07	6.8178e-07	1	IGFBP5,EGR1,IFIT3,IIGP1,PLEC,FOS,CCL12,IGTP,PARP14,XAF1,TRF,KLF2,ID2,ZFP36,CCL9,CD81,CD74,RHOB,NPTN,CD9,NRROS,MT-ND1,MT-ND4,IFI213,ATP13A2,IL2RG,C3AR1,FXYD2,VIM,IRF1,IER2,SLC3A2,GBP7,C5AR1,RTP4,ILK,TSPO,RASA4,ADIPOR1,ABCA1,TCIRG1,GPI1,LDHA,IFI203,ZFP36L1,UBE2B,ANXA5,PRDX2,CD14,MT-ND3,MPP1,RHOA,SERPINB6A,PRDX1,TNFRSF1A,MT-ND5,LRP6,DNM2,P2RX4,ITGB2,UBE2I,TGFBR1,EEF1B2,PSAP,IFNGR1,CXCL16,ZFP36L2,ACT…
GO:0030098	lymphocyte differentiation	6.95435e-07	6.95435e-07	1	EGR1,ID2,CD74,IL2RG,IRF1,IRF2BP2,CD79B,MAFB,TCIRG1,ZFP36L1,PRDX2,RHOA,PSAP,ZFP36L2,HMGB1,VSIR,POU2F2,PRELID1,PTPRC,SEMA4A,PREX1,WWP1,INPP5D,SYK,FCER1G
GO:0048518	positive regulation of biological process	9.43654e-07	9.43654e-07	1	IGFBP5,EGR1,FOS,CCL12,PARP14,TRF,DEGS1,SLC6A6,METRNL,KLF2,ID2,PLTP,ZFP36,PICALM,CCL9,CD81,CD74,BLNK,RHOB,NPTN,H2-T23,IFI213,RAB7,LAMP1,ATP13A2,IL2RG,C3AR1,VIM,IRF1,SP110,IER2,C5AR1,RUNX1,RNF13,H2-D1,RAB11A,YWHAE,HEXB,CD79B,ILK,FAM46A,DDX39B,MAFB,TSPO,ADIPOR1,SUMO2,ABCA1,GPI1,LDHA,IFI203,ZFP36L1,FYB,UBE2B,C1QC,ANXA5,TRMT112,TAOK3,PRDX2,CD14,FERMT3,RHOA,TNFRSF1A,LRP6,DNM2,GLMP,C1QB,P2RX4,ITGB2,UBE2…
GO:1901700	response to oxygen-containing compound	1.65901e-06	1.65901e-06	1	IGFBP5,EGR1,FOS,CCL12,KLF2,ZFP36,RHOB,CD9,MT-ND1,MT-ND4,VIM,IRF1,C5AR1,TSPO,ADIPOR1,ABCA1,GPI1,LDHA,ZFP36L1,ANXA5,PRDX2,CD14,RHOA,PRDX1,MT-ND5,LRP6,DNM2,P2RX4,TGFBR1,EEF1B2,PSAP,CXCL16,FIS1,MT-CYTB,HMGB1,SLC29A1,IFNAR1,TRA2B,TWF2,MT1,JUN,NME2,ATP2B1,LGMN,GSN,PRKCD,EIF2AK2,GPX1,ALDH2,YWHAG,NR3C1,GNAS,NFKBIA,PTPRE,CD68,GNAI2,LY86,CALM3,CALR,PRPF8
GO:0042110	T cell activation	1.79097e-06	1.79097e-06	1	EGR1,CD81,CD74,H2-T23,IL2RG,IRF1,CLEC4A2,MAFB,TCIRG1,ZFP36L1,CD48,PRDX2,RHOA,PSAP,ZFP36L2,HMGB1,VSIR,IFNAR1,DDOST,PRELID1,GSN,PTPRC,SEMA4A,PREX1,WWP1,SYK,FCER1G,TNFAIP8L2
GO:0048584	positive regulation of response to stimulus	1.85674e-06	1.85674e-06	1	IGFBP5,CCL12,PARP14,TRF,KLF2,CCL9,CD81,CD74,BLNK,NPTN,H2-T23,IFI213,LAMP1,C3AR1,IRF1,C5AR1,RNF13,H2-D1,CD79B,ILK,ADIPOR1,IFI203,FYB,UBE2B,C1QC,TAOK3,PRDX2,CD14,RHOA,TNFRSF1A,C1QB,P2RX4,ITGB2,UBE2I,H2-K1,TGFBR1,PSAP,IFNGR1,ACTG1,FIS1,HMGB1,CCL6,VSIR,CTSS,MNDAL,UBB,JUN,WNK1,ALOX5AP,ERP29,PEA15A,LGMN,GSN,IL10RA,PTPRC,PRKCD,EIF2AK2,GPX1,GNAS,PPP1CA,SH3GLB1,NFKBIA,GNAI2,LY86,CALM3,SYK,FCER1G,ATP6V0C,C…
GO:0002683	negative regulation of immune system process	1.88717e-06	1.88717e-06	1	CCL12,PARP14,TSC22D3,ID2,ZFP36,CD74,H2-T23,TAP1,IRF1,MAFB,ZFP36L1,C1QC,PRDX2,HMGB1,VSIR,NME2,PCBP2,PTPRC,CD37,TMEM176A,GPX1,NFKBIA,TMEM176B,CD68,INPP5D,FCER1G,TNFAIP8L2
GO:0009617	response to bacterium	2.03406e-06	2.03406e-06	1	IFIT3,IIGP1,FOS,CCL12,TRF,ZFP36,H2-T23,VIM,SP110,GBP7,C5AR1,CD79B,FAM46A,TSPO,IGHM,ABCA1,PRDX2,CD14,STAB1,RHOA,TNFRSF1A,H2-K1,CXCL16,HMGB1,IFNAR1,MNDAL,JUN,SLFN2,PRKCD,EIF2AK2,GPX1,NFKBIA,CD52,CD68,LY86,RAB14,SYK,FCER1G,PRPF8
GO:0045087	innate immune response	2.13173e-06	2.13173e-06	1	IFIT3,IIGP1,CCL12,PARP14,CCL9,CD74,H2-T23,IFI213,LAMP1,TAP1,VIM,IRF1,SP110,GBP7,CLEC4A2,IGHM,IFI203,C1QC,CD14,PRDX1,C1QB,CXCL16,ACTG1,HMGB1,CCL6,IFNAR1,MNDAL,GSN,PCBP2,OAS1A,ZYX,EIF2AK2,CIITA,LY86,SYK,FCER1G,TNFAIP8L2,G3BP2
GO:0050793	regulation of developmental process	2.23467e-06	2.23467e-06	1	IGFBP5,EGR1,MGP,FOS,CCL12,TRF,SLC6A6,PRPF40A,METRNL,KLF2,ID2,ZFP36,PICALM,CCL9,AP2A2,CD74,RHOB,NPTN,IL2RG,C3AR1,VIM,IRF1,C5AR1,RUNX1,H2-D1,RAB11A,HEXB,ILK,DDX39B,MAFB,TSPO,ADIPOR1,TCIRG1,ZFP36L1,C1QC,PRDX2,SRGAP2,STAB1,RHOA,TNFRSF1A,DNM2,P2RX4,ITGB2,H2-K1,TGFBR1,ZFP36L2,PPIB,FIS1,HMGB1,VSIR,TWF2,JUN,NME2,WNK1,WDR1,YWHAH,ATP2B1,PRELID1,P4HB,LGMN,TAF6L,PTPRC,MACF1,TMEM176A,SEMA4A,EIF2AK2,MYL12A,PRE…
GO:0030217	T cell differentiation	3.30862e-06	3.30862e-06	1	EGR1,CD74,IL2RG,IRF1,MAFB,TCIRG1,ZFP36L1,PRDX2,RHOA,PSAP,ZFP36L2,HMGB1,VSIR,PRELID1,PTPRC,SEMA4A,PREX1,WWP1,SYK,FCER1G
GO:0051179	localization	3.82151e-06	3.82151e-06	1	IGFBP5,EGR1,CCL12,MT-ATP8,TRF,SLC6A6,PRPF40A,PLTP,ZFP36,PICALM,CCL9,NISCH,AP2A2,CD81,CD74,RHOB,NPTN,CD9,NRROS,H2-T23,MT-ND4,RAB7,LAMP1,MFSD1,ATP13A2,IL2RG,TAP1,C3AR1,FXYD2,VIM,IER2,SLC3A2,C5AR1,RTP4,RAB11A,YWHAE,BLOC1S1,HEXB,ILK,GDI2,DDX39B,TSPO,ATP5K,ADIPOR1,SUMO2,ABCA1,TCIRG1,SPCS1,GPI1,ZFP36L1,FYB,UBE2B,LGALS3BP,ANXA5,CD14,SRGAP2,MPP1,FERMT3,STAB1,RHOA,TNFRSF1A,MT-ND5,LRP6,DNM2,P2RX4,ITGB2,TGF…
GO:0032101	regulation of response to external stimulus	6.64138e-06	6.64138e-06	1	CCL12,PARP14,METRNL,ZFP36,CD81,CD74,CD9,H2-T23,IFI213,LAMP1,TAP1,C3AR1,IRF1,C5AR1,IFI203,ANXA5,PRDX2,MPP1,TNFRSF1A,P2RX4,HMGB1,CTSS,MNDAL,WNK1,ALOX5AP,LGMN,PCBP2,CD37,SEMA4A,ZYX,PRKCD,GPX1,ALDH2,NFKBIA,LY86,SYK,FCER1G,TNFAIP8L2,CALR
GO:0002250	adaptive immune response	8.07718e-06	8.07718e-06	1	CD81,CD74,H2-T23,TAP1,C3AR1,IRF1,H2-D1,CLEC4A2,CD79B,IGHM,TCIRG1,ADGRE1,C1QC,CD48,H2-DMB1,C1QB,H2-K1,HMGB1,VSIR,POU2F2,CTSS,H2-DMA,PTPRC,SEMA4A,PRKCD,INPP5D,SYK,FCER1G
GO:0009987	cellular process	8.16236e-06	8.16236e-06	1	IGFBP5,EGR1,MGP,IFIT3,IIGP1,PLEC,IER3,FOS,CCL12,IGTP,MT-ATP8,PARP14,XAF1,TRF,DEGS1,SLC6A6,PRPF40A,METRNL,KLF2,TSC22D3,ID2,PLTP,ZFP36,PICALM,APLP2,CCL9,NISCH,AP2A2,CMPK1,CD81,CD74,BLNK,SLFN8,RHOB,NPTN,CD9,NRROS,H2-T23,MT-ND1,MT-ND4,IFI213,RAB7,LAMP1,MFSD1,ATP13A2,IL2RG,BCL2A1B,CAPG,TAP1,BRD2,C3AR1,FXYD2,VIM,IRF1,UNC93B1,SP110,DOK3,SSU72,IER2,SLC3A2,GBP7,C5AR1,RUNX1,RTP4,RNF13,H2-D1,CLEC4A2,RAB11A,…
GO:0030099	myeloid cell differentiation	9.31383e-06	9.31383e-06	1	FOS,TRF,KLF2,ID2,ZFP36,CD81,CD74,NRROS,RUNX1,MAFB,BATF3,TCIRG1,ZFP36L1,C1QC,HMGB1,JUN,TCEA1,NME2,WDR1,KMT2E,GNAS,NFKBIA,INPP5D,FCER1G
GO:0097529	myeloid leukocyte migration	1.06397e-05	1.06397e-05	1	CCL12,CCL9,CD81,CD74,CD9,C3AR1,C5AR1,MPP1,P2RX4,ITGB2,PPIB,HMGB1,CCL6,WDR1,LGMN,PREX1,SYK,FCER1G
GO:0051239	regulation of multicellular organismal process	1.17439e-05	1.17439e-05	1	IGFBP5,EGR1,MGP,FOS,TRF,KLF2,ID2,ZFP36,PICALM,AP2A2,CD81,CD74,RHOB,NPTN,CD9,H2-T23,IL2RG,C3AR1,VIM,IRF1,C5AR1,RUNX1,H2-D1,CLEC4A2,RAB11A,ILK,DDX39B,MAFB,TSPO,ADIPOR1,ABCA1,TCIRG1,GPI1,ZFP36L1,C1QC,ANXA5,PRDX2,CD14,SRGAP2,STAB1,RHOA,TNFRSF1A,DNM2,P2RX4,ITGB2,H2-K1,TGFBR1,IFNGR1,ZFP36L2,PPIB,HMGB1,VSIR,POU2F2,IFNAR1,CTSS,MNDAL,TWF2,JUN,NME2,WNK1,WDR1,YWHAH,ATP2B1,PRELID1,LGMN,TAF6L,PTPRC,MACF1,TMEM…
GO:0015980	energy derivation by oxidation of organic compounds	1.27311e-05	1.27311e-05	1	MT-ND1,MT-ND4,BLOC1S1,MT-ND4L,LDHA,MT-ND5,MT-ND2,COX7C,MT-CO3,MT-CYTB,HMGB1,MT-CO1,CYCS,SDHB,PRELID1,GNAS,PPP1CA,MDH1,MT-CO2
GO:0010942	positive regulation of cell death	1.29181e-05	1.29181e-05	1	EGR1,FOS,CCL12,DEGS1,SLC6A6,PICALM,RHOB,IRF1,SP110,TSPO,LDHA,ANXA5,RHOA,TNFRSF1A,TGFBR1,FIS1,HMGB1,CYCS,UBB,JUN,PRELID1,PEA15A,GSN,PTPRC,PRKCD,EIF2AK2,PPP1CA,SH3GLB1,INPP5D,SYK,MT-CO2,SPOP,TOMM22
GO:0032879	regulation of localization	1.42039e-05	1.42039e-05	1	IGFBP5,EGR1,CCL12,TRF,PLTP,ZFP36,PICALM,NISCH,CD81,CD74,RHOB,NPTN,CD9,H2-T23,RAB7,LAMP1,ATP13A2,IL2RG,C3AR1,FXYD2,VIM,C5AR1,RAB11A,YWHAE,ILK,TSPO,ADIPOR1,ABCA1,TCIRG1,GPI1,ZFP36L1,ANXA5,CD14,SRGAP2,MPP1,FERMT3,RHOA,TNFRSF1A,DNM2,P2RX4,ITGB2,TGFBR1,IFNGR1,CXCL16,ACTG1,FIS1,HMGB1,VSIR,1810037I17RIK,CTSS,JUN,WNK1,WDR1,ERP29,YWHAH,ATP2B1,PRELID1,TPR,TMEM37,PEA15A,LGMN,GSN,ARL6IP1,PTPRC,MACF1,SEMA4A,P…
GO:0019882	antigen processing and presentation	1.50019e-05	1.50019e-05	1	CD74,H2-T23,TAP1,H2-D1,CLEC4A2,H2-DMB1,H2-K1,PSAP,CTSS,H2-DMA,CD68,FCER1G,CALR
GO:0002684	positive regulation of immune system process	1.9127e-05	1.9127e-05	1	FOS,CCL12,ID2,CD81,CD74,BLNK,H2-T23,IFI213,LAMP1,IL2RG,C3AR1,IRF1,C5AR1,RUNX1,H2-D1,CD79B,GPI1,IFI203,ZFP36L1,FYB,C1QC,RHOA,C1QB,P2RX4,ITGB2,H2-K1,HMGB1,VSIR,MNDAL,JUN,WNK1,LGMN,PTPRC,CD37,GNAS,INPP5D,SYK,FCER1G,CALR
GO:0048519	negative regulation of biological process	2.04013e-05	2.04013e-05	1	IGFBP5,EGR1,IFIT3,IER3,CCL12,PARP14,XAF1,METRNL,KLF2,TSC22D3,ID2,ZFP36,PICALM,APLP2,CCL9,NISCH,CD74,RHOB,NPTN,CD9,NRROS,H2-T23,IFI213,RAB7,BCL2A1B,CAPG,TAP1,FXYD2,VIM,IRF1,C5AR1,H2-D1,CLEC4A2,DOK2,YWHAE,ITM2B,IRF2BP2,ILK,FAM46A,DDX39B,MAFB,TSPO,RASA4,ADIPOR1,BATF3,SUMO2,GPI1,ZFP36L1,UBE2B,C1QC,ANXA5,TAOK3,PRDX2,SRGAP2,STAB1,RHOA,SERPINB6A,TNFRSF1A,LRP6,DNM2,P2RX4,UBE2I,H2-K1,TGFBR1,PSAP,IFNGR1,ZF…
GO:0035556	intracellular signal transduction	2.11972e-05	2.11972e-05	1	IGFBP5,CCL12,TRF,ZFP36,CCL9,NISCH,CD81,CD74,BLNK,RHOB,BCL2A1B,IRF1,DOK3,C5AR1,RNF13,DOK2,YWHAE,STARD8,ILK,GDI2,RASA4,ADIPOR1,ABCA1,ADGRE1,ZFP36L1,UBE2B,TAOK3,PRDX2,CD14,RHOA,PRDX1,TNFRSF1A,DNM2,P2RX4,UBE2I,TGFBR1,PSAP,ZFP36L2,FIS1,VDAC2,HMGB1,CCL6,GRINA,UBB,TWF2,MT1,JUN,NME2,WNK1,ERP29,P4HB,PEA15A,GSN,PTPRC,PRKCD,EIF2AK2,PREX1,GPX1,ALDH2,SHISA5,GNAS,NFKBIA,INPP5D,GNAI2,CRIP1,CALM3,SYK,ATP6V0C,CAL…
GO:1901701	cellular response to oxygen-containing compound	2.26332e-05	2.26332e-05	1	IGFBP5,EGR1,FOS,CCL12,KLF2,ZFP36,RHOB,VIM,IRF1,TSPO,ADIPOR1,ABCA1,ZFP36L1,ANXA5,PRDX2,CD14,RHOA,PRDX1,LRP6,DNM2,P2RX4,PSAP,CXCL16,FIS1,HMGB1,SLC29A1,TRA2B,TWF2,MT1,JUN,NME2,ATP2B1,LGMN,PRKCD,GPX1,ALDH2,YWHAG,NR3C1,GNAS,NFKBIA,PTPRE,CD68,GNAI2,LY86,PRPF8
GO:0002478	antigen processing and presentation of exogenous peptide antigen	2.33722e-05	2.33722e-05	1	CD74,H2-T23,TAP1,CLEC4A2,H2-K1,CTSS,FCER1G
GO:0010038	response to metal ion	2.99594e-05	2.99594e-05	1	FOS,TRF,ID2,ATP13A2,TSPO,RASA4,TCIRG1,GPI1,ANXA5,CD14,P2RX4,MT-CYTB,MT-CO1,MT1,JUN,WNK1,ALOX5AP,LGMN,GSN,PPP1CA,CRIP1,CALM3,CALR
GO:0002474	antigen processing and presentation of peptide antigen via MHC class I	3.38582e-05	3.38582e-05	1	H2-T23,TAP1,H2-D1,CLEC4A2,H2-K1,FCER1G,CALR
GO:0050896	response to stimulus	3.49995e-05	3.49995e-05	1	IGFBP5,EGR1,IFIT3,IIGP1,PLEC,IER3,FOS,CCL12,IGTP,PARP14,XAF1,TRF,METRNL,KLF2,TSC22D3,ID2,ZFP36,APLP2,CCL9,NISCH,CD81,CD74,BLNK,SLFN8,RHOB,NPTN,CD9,NRROS,H2-T23,MT-ND1,MT-ND4,IFI213,RAB7,LAMP1,ATP13A2,IL2RG,BCL2A1B,TAP1,C3AR1,FXYD2,VIM,IRF1,UNC93B1,SP110,DOK3,IER2,SLC3A2,GBP7,C5AR1,RTP4,RNF13,H2-D1,CLEC4A2,DOK2,YWHAE,HMOX2,STARD8,CD79B,ILK,FAM46A,GDI2,DDX39B,TSPO,IGHM,RASA4,ADIPOR1,BATF3,ABCA1,TCI…
GO:0048870	cell motility	3.68975e-05	3.68975e-05	1	IGFBP5,EGR1,CCL12,TRF,PRPF40A,PLTP,CCL9,NISCH,CD81,CD74,RHOB,CD9,C3AR1,VIM,IER2,C5AR1,RAB11A,YWHAE,HEXB,ILK,TSPO,ADIPOR1,GPI1,UBE2B,ANXA5,SRGAP2,MPP1,FERMT3,RHOA,P2RX4,ITGB2,TGFBR1,CXCL16,ACTG1,PPIB,HMGB1,CCL6,VSIR,JUN,WNK1,WDR1,LGMN,PTPRC,MACF1,SEMA4A,PRKCD,PREX1,GPX1,GNAI2,SYK,FCER1G,PLEKHO1,CALR
GO:0051674	localization of cell	3.68975e-05	3.68975e-05	1	IGFBP5,EGR1,CCL12,TRF,PRPF40A,PLTP,CCL9,NISCH,CD81,CD74,RHOB,CD9,C3AR1,VIM,IER2,C5AR1,RAB11A,YWHAE,HEXB,ILK,TSPO,ADIPOR1,GPI1,UBE2B,ANXA5,SRGAP2,MPP1,FERMT3,RHOA,P2RX4,ITGB2,TGFBR1,CXCL16,ACTG1,PPIB,HMGB1,CCL6,VSIR,JUN,WNK1,WDR1,LGMN,PTPRC,MACF1,SEMA4A,PRKCD,PREX1,GPX1,GNAI2,SYK,FCER1G,PLEKHO1,CALR
GO:0002573	myeloid leukocyte differentiation	3.90543e-05	3.90543e-05	1	FOS,TRF,ID2,CD81,CD74,NRROS,RUNX1,MAFB,BATF3,TCIRG1,ZFP36L1,C1QC,JUN,NME2,GNAS,INPP5D,FCER1G
GO:0050900	leukocyte migration	4.25812e-05	4.25812e-05	1	CCL12,CCL9,CD81,CD74,CD9,C3AR1,C5AR1,MPP1,RHOA,P2RX4,ITGB2,CXCL16,PPIB,HMGB1,CCL6,WNK1,WDR1,LGMN,PREX1,SYK,FCER1G,CALR
GO:0045333	cellular respiration	4.83402e-05	4.83402e-05	1	MT-ND1,MT-ND4,BLOC1S1,MT-ND4L,MT-ND5,MT-ND2,COX7C,MT-CO3,MT-CYTB,MT-CO1,CYCS,SDHB,PRELID1,MDH1,MT-CO2
GO:0042773	ATP synthesis coupled electron transport	5.02211e-05	5.02211e-05	1	MT-ND4,MT-ND4L,MT-ND5,MT-ND2,COX7C,MT-CO3,MT-CYTB,MT-CO1,CYCS,MT-CO2
GO:0048002	antigen processing and presentation of peptide antigen	5.86035e-05	5.86035e-05	1	CD74,H2-T23,TAP1,H2-D1,CLEC4A2,H2-K1,CTSS,H2-DMA,FCER1G,CALR
GO:2000026	regulation of multicellular organismal development	6.15469e-05	6.15469e-05	1	EGR1,MGP,FOS,TRF,KLF2,ID2,ZFP36,PICALM,AP2A2,CD74,RHOB,NPTN,IL2RG,C3AR1,VIM,IRF1,C5AR1,RUNX1,H2-D1,RAB11A,ILK,DDX39B,MAFB,TSPO,ADIPOR1,ZFP36L1,C1QC,PRDX2,SRGAP2,STAB1,RHOA,TNFRSF1A,DNM2,P2RX4,ITGB2,H2-K1,TGFBR1,ZFP36L2,HMGB1,VSIR,TWF2,JUN,NME2,WNK1,WDR1,YWHAH,ATP2B1,PRELID1,PTPRC,MACF1,TMEM176A,SEMA4A,EIF2AK2,PREX1,GPX1,YWHAG,GNAS,SH3GLB1,NFKBIA,TMEM176B,INPP5D,RAB14,SYK,CALR
GO:0002252	immune effector process	6.43432e-05	6.43432e-05	1	IFIT3,CD81,CD74,SLFN8,H2-T23,LAMP1,TAP1,IRF1,RTP4,H2-D1,TCIRG1,GPI1,C1QC,PRDX2,PRDX1,C1QB,ITGB2,H2-K1,IFNGR1,HMGB1,VSIR,POU2F2,IFNAR1,WDR1,PCBP2,PTPRC,CD37,OAS1A,SEMA4A,PRKCD,EIF2AK2,KMT2E,INPP5D,SYK,FCER1G
GO:0022904	respiratory electron transport chain	6.7055e-05	6.7055e-05	1	MT-ND4,MT-ND4L,MT-ND5,MT-ND2,COX7C,MT-CO3,MT-CYTB,MT-CO1,CYCS,SDHB,MT-CO2
GO:0009719	response to endogenous stimulus	7.68768e-05	7.68768e-05	1	IGFBP5,EGR1,FOS,KLF2,ZFP36,CD81,NPTN,CD9,NRROS,VIM,IRF1,IER2,ILK,TSPO,ADIPOR1,GPI1,LDHA,ZFP36L1,ANXA5,MT-ND3,RHOA,LRP6,DNM2,P2RX4,UBE2I,TGFBR1,ZFP36L2,FIS1,MT-CYTB,HMGB1,VSIR,CTSS,JUN,NME2,YWHAH,ATP2B1,TPR,LGMN,ZYX,PRKCD,H3F3A,YWHAG,NR3C1,GNAS,PTPRE,CD68,GNAI2,RAB14,CALM3,SYK,FCER1G,CALR
GO:1902107	positive regulation of leukocyte differentiation	7.72283e-05	7.72283e-05	1	FOS,ID2,CD74,IL2RG,IRF1,RUNX1,ZFP36L1,RHOA,HMGB1,VSIR,JUN,PTPRC,GNAS,INPP5D,SYK
GO:0030595	leukocyte chemotaxis	8.60566e-05	8.60566e-05	1	CCL12,CCL9,CD74,C3AR1,C5AR1,MPP1,ITGB2,CXCL16,PPIB,HMGB1,CCL6,WNK1,LGMN,PREX1,SYK,FCER1G,CALR
GO:0048522	positive regulation of cellular process	0.000102072	0.000102072	1	IGFBP5,EGR1,FOS,CCL12,PARP14,TRF,DEGS1,SLC6A6,METRNL,KLF2,ID2,ZFP36,PICALM,CCL9,CD81,CD74,RHOB,NPTN,H2-T23,RAB7,LAMP1,ATP13A2,IL2RG,C3AR1,VIM,IRF1,SP110,IER2,C5AR1,RUNX1,RNF13,H2-D1,RAB11A,YWHAE,HEXB,ILK,DDX39B,MAFB,TSPO,ADIPOR1,SUMO2,ABCA1,GPI1,LDHA,ZFP36L1,UBE2B,ANXA5,TRMT112,TAOK3,PRDX2,CD14,FERMT3,RHOA,TNFRSF1A,LRP6,DNM2,GLMP,P2RX4,ITGB2,UBE2I,H2-K1,TGFBR1,PSAP,IFNGR1,CXCL16,ZFP36L2,ACTG1,SNR…
GO:1990266	neutrophil migration	0.000102368	0.000102368	1	CCL12,CCL9,CD74,C3AR1,C5AR1,MPP1,ITGB2,PPIB,CCL6,WDR1,PREX1,SYK,FCER1G
GO:0030593	neutrophil chemotaxis	0.000115037	0.000115037	1	CCL12,CCL9,CD74,C3AR1,C5AR1,MPP1,ITGB2,PPIB,CCL6,PREX1,SYK,FCER1G
GO:0048523	negative regulation of cellular process	0.000115061	0.000115061	1	IGFBP5,EGR1,IFIT3,IER3,CCL12,PARP14,XAF1,KLF2,TSC22D3,ID2,ZFP36,PICALM,APLP2,CCL9,NISCH,CD74,RHOB,CD9,NRROS,H2-T23,IFI213,RAB7,BCL2A1B,CAPG,TAP1,FXYD2,VIM,IRF1,C5AR1,H2-D1,DOK2,YWHAE,ITM2B,IRF2BP2,ILK,FAM46A,DDX39B,MAFB,TSPO,RASA4,ADIPOR1,BATF3,SUMO2,GPI1,ZFP36L1,UBE2B,C1QC,ANXA5,TAOK3,PRDX2,SRGAP2,RHOA,SERPINB6A,TNFRSF1A,LRP6,DNM2,UBE2I,H2-K1,TGFBR1,PSAP,ZFP36L2,VDAC2,HMGB1,MORF4L1,VSIR,GRINA,18…
GO:0010243	response to organonitrogen compound	0.00012261	0.00012261	1	IGFBP5,EGR1,FOS,KLF2,CD81,CD9,NRROS,VIM,IRF1,C5AR1,TSPO,ADIPOR1,GPI1,LDHA,ZFP36L1,ANXA5,RHOA,MT-ND5,LRP6,DNM2,P2RX4,FIS1,MT-CYTB,JUN,NME2,ATP2B1,PEA15A,LGMN,GSN,PRKCD,YWHAG,GNAS,NFKBIA,PTPRE,CD68,GNAI2,SEC61B,CALM3,SYK,FCER1G
GO:0042592	homeostatic process	0.00013634	0.00013634	1	IGFBP5,EGR1,TRF,METRNL,KLF2,TSC22D3,ID2,ZFP36,PICALM,APLP2,CD74,NPTN,RAB7,ATP13A2,C3AR1,C5AR1,YWHAE,HMOX2,HEXB,MAFB,TSPO,ADIPOR1,ABCA1,TCIRG1,GPI1,ZFP36L1,PRDX2,PRDX1,LRP6,P2RX4,FIS1,HMGB1,GRINA,SLC29A1,TRA2B,CTSS,UBB,MT1,TCEA1,NME2,WNK1,ATP2B1,P4HB,UBAP2L,PTPRC,GPX1,KMT2E,GNAS,CD52,INPP5D,GNAI2,CALM3,SYK,FCER1G,ATP6V0C,SH3BGRL3,SPOP,NOP10
GO:0045595	regulation of cell differentiation	0.000139315	0.000139315	1	IGFBP5,FOS,TRF,SLC6A6,METRNL,ID2,ZFP36,PICALM,CCL9,AP2A2,CD74,NPTN,IL2RG,VIM,IRF1,RUNX1,H2-D1,RAB11A,ILK,DDX39B,MAFB,TSPO,ADIPOR1,TCIRG1,ZFP36L1,C1QC,PRDX2,SRGAP2,RHOA,TNFRSF1A,DNM2,P2RX4,H2-K1,TGFBR1,ZFP36L2,HMGB1,VSIR,TWF2,JUN,NME2,WDR1,YWHAH,PRELID1,P4HB,PTPRC,MACF1,TMEM176A,SEMA4A,EIF2AK2,PREX1,YWHAG,GNAS,SH3GLB1,NFKBIA,TMEM176B,INPP5D,CLIC1,SYK,CALR
GO:1903707	negative regulation of hemopoiesis	0.000145493	0.000145493	1	ID2,ZFP36,CD74,IRF1,MAFB,ZFP36L1,C1QC,PRDX2,HMGB1,NME2,TMEM176A,NFKBIA,TMEM176B,INPP5D
GO:1901698	response to nitrogen compound	0.000180817	0.000180817	1	IGFBP5,EGR1,FOS,KLF2,CD81,CD9,NRROS,VIM,IRF1,SLC3A2,C5AR1,TSPO,ADIPOR1,GPI1,LDHA,ZFP36L1,ANXA5,RHOA,MT-ND5,LRP6,DNM2,P2RX4,FIS1,MT-CYTB,JUN,NME2,ATP2B1,PEA15A,LGMN,GSN,PRKCD,CIITA,YWHAG,GNAS,NFKBIA,PTPRE,CD68,GNAI2,SEC61B,CALM3,SYK,FCER1G
GO:0040011	locomotion	0.000192129	0.000192129	1	IGFBP5,EGR1,CCL12,TRF,PRPF40A,ID2,PLTP,CCL9,NISCH,CD81,CD74,RHOB,NPTN,CD9,C3AR1,VIM,IER2,C5AR1,RAB11A,YWHAE,HEXB,ILK,TSPO,ADIPOR1,GPI1,UBE2B,ANXA5,SRGAP2,MPP1,FERMT3,RHOA,P2RX4,ITGB2,TGFBR1,CXCL16,ACTG1,PPIB,HMGB1,CCL6,VSIR,JUN,WNK1,WDR1,LGMN,PTPRC,MACF1,SEMA4A,PRKCD,PREX1,GPX1,GNAI2,SYK,FCER1G,PLEKHO1,CALR
GO:0016477	cell migration	0.000194082	0.000194082	1	IGFBP5,EGR1,CCL12,PRPF40A,CCL9,NISCH,CD81,CD74,RHOB,CD9,C3AR1,VIM,C5AR1,RAB11A,YWHAE,HEXB,ILK,TSPO,ADIPOR1,GPI1,SRGAP2,MPP1,FERMT3,RHOA,P2RX4,ITGB2,TGFBR1,CXCL16,ACTG1,PPIB,HMGB1,CCL6,VSIR,JUN,WNK1,WDR1,LGMN,PTPRC,MACF1,SEMA4A,PRKCD,PREX1,GPX1,GNAI2,SYK,FCER1G,PLEKHO1,CALR
GO:0019884	antigen processing and presentation of exogenous antigen	0.000218277	0.000218277	1	CD74,H2-T23,TAP1,CLEC4A2,H2-K1,CTSS,FCER1G
GO:0051246	regulation of protein metabolic process	0.000221633	0.000221633	1	IGFBP5,EGR1,CCL12,PARP14,TRF,KLF2,ZFP36,PICALM,APLP2,CCL9,CD81,CD74,NPTN,RAB7,ATP13A2,VIM,IRF1,C5AR1,DOK2,YWHAE,ITM2B,ILK,DDX39B,TSPO,SUMO2,GPI1,ZFP36L1,UBE2B,TAOK3,PRDX2,RHOA,SERPINB6A,PRDX1,TNFRSF1A,LRP6,ITGB2,UBE2I,TGFBR1,PSAP,IFNGR1,ZFP36L2,FIS1,HMGB1,CCL6,VSIR,RPL38,IFNAR1,CYCS,UBB,JUN,WNK1,ERP29,PRELID1,TPR,LGMN,GSN,ARL6IP1,PTPRC,PRKCD,SRP9,EIF2AK2,TMEM59,GPX1,CSNK1A1,KMT2E,WWP1,GNAS,PPP1CA…
GO:2000147	positive regulation of cell motility	0.000231539	0.000231539	1	IGFBP5,EGR1,CCL12,TRF,CD74,RHOB,C3AR1,C5AR1,RAB11A,ILK,GPI1,FERMT3,RHOA,P2RX4,TGFBR1,CXCL16,ACTG1,HMGB1,VSIR,JUN,WNK1,LGMN,PTPRC,SEMA4A,PREX1,GNAI2,CALR
GO:0006119	oxidative phosphorylation	0.000306476	0.000306476	1	MT-ND4,ATP5K,MT-ND4L,RHOA,MT-ND5,MT-ND2,COX7C,MT-CO3,MT-CYTB,MT-CO1,CYCS,MT-CO2
GO:0009628	response to abiotic stimulus	0.000318368	0.000318368	1	EGR1,FOS,METRNL,TSC22D3,ID2,RHOB,CD9,MT-ND4,FXYD2,IRF1,YWHAE,HMOX2,TSPO,GPI1,LDHA,ZFP36L1,UBE2B,CD14,MT-ND3,RHOA,SERPINB6A,TNFRSF1A,MT-ND5,DNM2,MT-CYTB,SLC29A1,MT-CO1,CTSS,JUN,ATP2B1,P4HB,TPR,LGMN,PTPRC,GPX1,CIITA,PPP1CA,NFKBIA,CRIP1,MT-CO2,HP1BP3
GO:0014070	response to organic cyclic compound	0.000335447	0.000335447	1	IGFBP5,EGR1,IFIT3,FOS,CCL12,KLF2,ZFP36,MT-ND1,SLC3A2,TSPO,ABCA1,GPI1,LDHA,ZFP36L1,MT-ND3,RHOA,LRP6,DNM2,P2RX4,UBE2I,TGFBR1,ZFP36L2,FIS1,MT-CYTB,HMGB1,JUN,YWHAH,ATP2B1,PEA15A,GSN,EIF2AK2,ALDH2,CIITA,NR3C1,GNAS,NFKBIA,CALM3,CALR
GO:0060326	cell chemotaxis	0.000347907	0.000347907	1	CCL12,CCL9,CD74,C3AR1,C5AR1,MPP1,P2RX4,ITGB2,CXCL16,PPIB,HMGB1,CCL6,WNK1,LGMN,PRKCD,PREX1,SYK,FCER1G,CALR
GO:0006091	generation of precursor metabolites and energy	0.000351378	0.000351378	1	MT-ND1,MT-ND4,BLOC1S1,ATP5K,MT-ND4L,GPI1,LDHA,RHOA,MT-ND5,MT-ND2,COX7C,MT-CO3,MT-CYTB,HMGB1,MT-CO1,CYCS,SDHB,PRELID1,GNAS,PPP1CA,MDH1,MT-CO2,SH3BGRL3
GO:0072593	reactive oxygen species metabolic process	0.000373755	0.000373755	1	KLF2,NRROS,TSPO,PRDX2,RHOA,PRDX1,DNM2,ITGB2,MT-ND2,CYCS,PRKCD,PREX1,GPX1,ALDH2,GNAI2,SYK,MT-CO2,GPX3
GO:0030335	positive regulation of cell migration	0.00038342	0.00038342	1	IGFBP5,EGR1,CCL12,CD74,RHOB,C3AR1,C5AR1,RAB11A,ILK,GPI1,FERMT3,RHOA,P2RX4,TGFBR1,CXCL16,ACTG1,HMGB1,VSIR,JUN,WNK1,LGMN,PTPRC,SEMA4A,PREX1,GNAI2,CALR
GO:0048731	system development	0.000392988	0.000392988	1	IGFBP5,EGR1,MGP,FOS,CCL12,TRF,DEGS1,KLF2,ID2,ZFP36,PICALM,APLP2,AP2A2,CD81,CD74,RHOB,NPTN,CD9,NRROS,H2-T23,MT-ND4,IL2RG,C3AR1,VIM,IRF1,IER2,C5AR1,RUNX1,H2-D1,RAB11A,YWHAE,BLOC1S1,IRF2BP2,HEXB,CD79B,ILK,DDX39B,MAFB,SELENOP,TSPO,ADIPOR1,BATF3,TCIRG1,LDHA,ZFP36L1,C1QC,TAOK3,PRDX2,SRGAP2,STAB1,RHOA,SERPINB6A,TNFRSF1A,LRP6,DNM2,C1QB,P2RX4,ITGB2,H2-K1,TGFBR1,PSAP,IFNGR1,ZFP36L2,ACTG1,PPIB,MT-CYTB,HMGB1…
GO:0040017	positive regulation of locomotion	0.000396612	0.000396612	1	IGFBP5,EGR1,CCL12,TRF,CD74,RHOB,C3AR1,C5AR1,RAB11A,ILK,GPI1,FERMT3,RHOA,P2RX4,TGFBR1,CXCL16,ACTG1,HMGB1,VSIR,JUN,WNK1,LGMN,PTPRC,SEMA4A,PREX1,GNAI2,CALR
GO:0015990	electron transport coupled proton transport	0.000416051	0.000416051	1	MT-ND4,MT-ND5,MT-CYTB,MT-CO1
GO:0015988	energy coupled proton transmembrane transport, against electrochemical gradient	0.000416051	0.000416051	1	MT-ND4,MT-ND5,MT-CYTB,MT-CO1
GO:1902106	negative regulation of leukocyte differentiation	0.000416931	0.000416931	1	ID2,CD74,IRF1,MAFB,C1QC,PRDX2,HMGB1,NME2,TMEM176A,TMEM176B,INPP5D
GO:0097190	apoptotic signaling pathway	0.000437732	0.000437732	1	CD74,LAMP1,BCL2A1B,PRDX2,TNFRSF1A,P2RX4,TGFBR1,FIS1,VDAC2,GRINA,UBB,JUN,ERP29,PRELID1,P4HB,PEA15A,GSN,PTPRC,PRKCD,GPX1,ALDH2,SHISA5,PPP1CA,SH3GLB1,GNAI2,CRIP1,SPOP
GO:0032502	developmental process	0.00044163	0.00044163	1	IGFBP5,EGR1,MGP,FOS,CCL12,TRF,DEGS1,SLC6A6,PRPF40A,METRNL,KLF2,ID2,ZFP36,PICALM,APLP2,CCL9,AP2A2,CD81,CD74,RHOB,NPTN,CD9,NRROS,H2-T23,MT-ND4,LAMP1,IL2RG,C3AR1,VIM,IRF1,IER2,C5AR1,RUNX1,H2-D1,RAB11A,YWHAE,BLOC1S1,IRF2BP2,HEXB,CD79B,ILK,DDX39B,MAFB,SELENOP,TSPO,ADIPOR1,BATF3,TCIRG1,GPI1,LDHA,ZFP36L1,UBE2B,C1QC,TAOK3,PRDX2,SRGAP2,FERMT3,STAB1,RHOA,SERPINB6A,TNFRSF1A,LRP6,DNM2,C1QB,P2RX4,ITGB2,UBE2I,…
GO:2000145	regulation of cell motility	0.000485375	0.000485375	1	IGFBP5,EGR1,CCL12,TRF,NISCH,CD81,CD74,RHOB,CD9,C3AR1,VIM,C5AR1,RAB11A,ILK,ADIPOR1,GPI1,ANXA5,SRGAP2,MPP1,FERMT3,RHOA,P2RX4,TGFBR1,CXCL16,ACTG1,HMGB1,VSIR,JUN,WNK1,LGMN,PTPRC,MACF1,SEMA4A,PREX1,GNAI2,CALR
GO:0072594	establishment of protein localization to organelle	0.000528006	0.000528006	1	RAB7,LAMP1,RAB11A,TSPO,SPCS1,TNFRSF1A,DNM2,FIS1,M6PR,SEC62,SRP14,TPR,IL10RA,PRKCD,SRP9,SH3GLB1,NFKBIA,CD68,SEC61B,CALM3,SYK,TOMM22
GO:0051272	positive regulation of cellular component movement	0.000532092	0.000532092	1	IGFBP5,EGR1,CCL12,TRF,CD74,RHOB,C3AR1,C5AR1,RAB11A,ILK,GPI1,FERMT3,RHOA,P2RX4,TGFBR1,CXCL16,ACTG1,HMGB1,VSIR,JUN,WNK1,LGMN,PTPRC,SEMA4A,PREX1,GNAI2,CALR
GO:0048513	animal organ development	0.000539271	0.000539271	1	IGFBP5,EGR1,MGP,FOS,TRF,KLF2,ID2,ZFP36,PICALM,APLP2,AP2A2,CD81,CD74,CD9,NRROS,H2-T23,MT-ND4,IL2RG,C3AR1,VIM,IRF1,C5AR1,RUNX1,YWHAE,IRF2BP2,CD79B,ILK,DDX39B,MAFB,SELENOP,TSPO,ADIPOR1,BATF3,TCIRG1,LDHA,ZFP36L1,C1QC,PRDX2,SRGAP2,RHOA,SERPINB6A,TNFRSF1A,LRP6,DNM2,C1QB,H2-K1,TGFBR1,PSAP,ZFP36L2,PPIB,MT-CYTB,HMGB1,VSIR,SLC29A1,POU2F2,RPL38,MT-CO1,TRA2B,UBB,JUN,TCEA1,NME2,WDR1,ATP2B1,PRELID1,MYL6,TACC1,…
GO:0009967	positive regulation of signal transduction	0.000550675	0.000550675	1	IGFBP5,CCL12,PARP14,TRF,KLF2,CCL9,CD81,CD74,NPTN,C5AR1,RNF13,ILK,ADIPOR1,UBE2B,TAOK3,PRDX2,CD14,RHOA,TNFRSF1A,P2RX4,UBE2I,TGFBR1,PSAP,IFNGR1,FIS1,HMGB1,CCL6,VSIR,UBB,JUN,WNK1,ERP29,PEA15A,GSN,IL10RA,PTPRC,PRKCD,EIF2AK2,GPX1,GNAS,PPP1CA,SH3GLB1,GNAI2,LY86,CALM3,SYK,ATP6V0C,CALR,SPOP
GO:0044267	cellular protein metabolic process	0.000555643	0.000555643	1	IGFBP5,EGR1,CCL12,PARP14,TRF,ZFP36,PICALM,APLP2,CCL9,CD81,CD74,NPTN,NRROS,RAB7,ATP13A2,VIM,IRF1,SSU72,C5AR1,RNF13,DOK2,YWHAE,BLOC1S1,IRF2BP2,HEXB,ILK,DDX39B,DPM3,TSPO,SUMO2,ABCA1,TCIRG1,SPCS1,GPI1,ZFP36L1,UBE2B,TRMT112,TAOK3,PRDX2,RHOA,SERPINB6A,PRDX1,TNFRSF1A,LRP6,ITGB2,UBE2I,TGFBR1,EEF1B2,PSAP,ZFP36L2,PPIB,FIS1,HMGB1,MORF4L1,CCL6,VSIR,RPL38,IFNAR1,RPL37,CTSS,RPL6,CYCS,UBB,JUN,DDOST,NME2,WNK1,OS…
GO:0071396	cellular response to lipid	0.000624779	0.000624779	1	CCL12,ZFP36,VIM,TSPO,ABCA1,ZFP36L1,PRDX2,CD14,MT-ND3,RHOA,LRP6,UBE2I,CXCL16,ZFP36L2,FIS1,HMGB1,TWF2,NME2,YWHAH,ATP2B1,NR3C1,GNAS,NFKBIA,CD68,LY86,CALR,PRPF8
GO:0046631	alpha-beta T cell activation	0.000646138	0.000646138	1	CD81,H2-T23,IL2RG,IRF1,CLEC4A2,TCIRG1,RHOA,PSAP,HMGB1,VSIR,PTPRC,SEMA4A,SYK
GO:0043085	positive regulation of catalytic activity	0.000650273	0.000650273	1	EGR1,CCL12,TRF,PICALM,CCL9,CD81,CD74,STARD8,ILK,GDI2,DPM3,RASA4,TAOK3,PRDX2,SRGAP2,RHOA,UBE2I,TGFBR1,PSAP,FIS1,HMGB1,CCL6,VSIR,CYCS,JUN,TCEA1,DDOST,WNK1,ALOX5AP,ERP29,PRELID1,LGMN,GSN,GM2A,PTPRC,PRKCD,EIF2AK2,TOR1AIP1,PREX1,GNAS,SH3GLB1,GNAI2,CALM3,SYK
GO:0043065	positive regulation of apoptotic process	0.000746636	0.000746636	1	EGR1,CCL12,DEGS1,RHOB,SP110,TSPO,LDHA,ANXA5,RHOA,TNFRSF1A,TGFBR1,FIS1,HMGB1,CYCS,UBB,JUN,PRELID1,PEA15A,GSN,PTPRC,PRKCD,EIF2AK2,PPP1CA,SH3GLB1,INPP5D,SYK,SPOP,TOMM22
GO:0045619	regulation of lymphocyte differentiation	0.000783798	0.000783798	1	ID2,CD74,IL2RG,IRF1,ZFP36L1,PRDX2,RHOA,ZFP36L2,HMGB1,VSIR,PRELID1,PTPRC,INPP5D,SYK
GO:0051050	positive regulation of transport	0.000806583	0.000806583	1	CCL12,TRF,PLTP,PICALM,CD81,H2-T23,RAB7,LAMP1,ATP13A2,IL2RG,YWHAE,TSPO,ABCA1,GPI1,CD14,TNFRSF1A,DNM2,P2RX4,ITGB2,IFNGR1,FIS1,CTSS,WNK1,ATP2B1,PRELID1,TPR,ARL6IP1,PTPRC,PRKCD,GNAS,SH3GLB1,NFKBIA,GNAI2,CALM3,SYK,FCER1G,CALR
GO:0043068	positive regulation of programmed cell death	0.000868446	0.000868446	1	EGR1,CCL12,DEGS1,RHOB,SP110,TSPO,LDHA,ANXA5,RHOA,TNFRSF1A,TGFBR1,FIS1,HMGB1,CYCS,UBB,JUN,PRELID1,PEA15A,GSN,PTPRC,PRKCD,EIF2AK2,PPP1CA,SH3GLB1,INPP5D,SYK,SPOP,TOMM22
GO:0006928	movement of cell or subcellular component	0.000961714	0.000961714	1	IGFBP5,EGR1,CCL12,TRF,PRPF40A,PLTP,CCL9,NISCH,CD81,CD74,RHOB,NPTN,CD9,LAMP1,C3AR1,VIM,IER2,C5AR1,RAB11A,YWHAE,BLOC1S1,HEXB,ILK,TSPO,ADIPOR1,GPI1,UBE2B,ANXA5,SRGAP2,MPP1,FERMT3,RHOA,P2RX4,ITGB2,TGFBR1,CXCL16,ACTG1,PPIB,HMGB1,CCL6,VSIR,UBB,JUN,WNK1,WDR1,MYL6,LGMN,PTPRC,MACF1,SEMA4A,PRKCD,PREX1,GPX1,GNAI2,SYK,FCER1G,PLEKHO1,CALR
GO:0001816	cytokine production	0.00101738	0.00101738	1	EGR1,KLF2,ZFP36,CD81,CD74,NPTN,NRROS,H2-T23,C3AR1,IRF1,C5AR1,RUNX1,CLEC4A2,TSPO,ABCA1,TCIRG1,CD14,TNFRSF1A,IFNGR1,HMGB1,VSIR,POU2F2,IFNAR1,MNDAL,ATP2B1,PTPRC,PRKCD,EIF2AK2,INPP5D,SYK,FCER1G
GO:0009893	positive regulation of metabolic process	0.0010273	0.0010273	1	EGR1,FOS,CCL12,PARP14,TRF,KLF2,ID2,ZFP36,PICALM,CCL9,CD81,CD74,NPTN,H2-T23,RAB7,ATP13A2,IL2RG,C3AR1,VIM,IRF1,IER2,C5AR1,RUNX1,HEXB,ILK,FAM46A,DDX39B,MAFB,TSPO,ADIPOR1,SUMO2,ZFP36L1,UBE2B,TRMT112,TAOK3,PRDX2,CD14,RHOA,TNFRSF1A,LRP6,DNM2,GLMP,ITGB2,UBE2I,TGFBR1,PSAP,IFNGR1,ZFP36L2,ACTG1,SNRNP70,FIS1,HMGB1,CCL6,VSIR,POU2F2,IFNAR1,TRA2B,CYCS,MNDAL,UBB,JUN,TCEA1,NME2,WNK1,ERP29,YWHAH,PRELID1,TACC1,LGM…
GO:0006954	inflammatory response	0.00115083	0.00115083	1	CCL12,METRNL,ZFP36,CCL9,CD81,NRROS,H2-T23,C3AR1,C5AR1,TCIRG1,PRDX2,CD14,TNFRSF1A,ITGB2,IFNGR1,HMGB1,CCL6,CTSS,JUN,ALOX5AP,ZYX,GPX1,ALDH2,CIITA,NFKBIA,CD68,LY86,SYK,FCER1G,TNFAIP8L2
GO:0097530	granulocyte migration	0.00116713	0.00116713	1	CCL12,CCL9,CD74,C3AR1,C5AR1,MPP1,ITGB2,PPIB,CCL6,WDR1,PREX1,SYK,FCER1G
GO:0030334	regulation of cell migration	0.00116723	0.00116723	1	IGFBP5,EGR1,CCL12,NISCH,CD81,CD74,RHOB,CD9,C3AR1,VIM,C5AR1,RAB11A,ILK,ADIPOR1,GPI1,SRGAP2,MPP1,FERMT3,RHOA,P2RX4,TGFBR1,CXCL16,ACTG1,HMGB1,VSIR,JUN,WNK1,LGMN,PTPRC,MACF1,SEMA4A,PREX1,GNAI2,CALR
GO:1903708	positive regulation of hemopoiesis	0.00120658	0.00120658	1	FOS,ID2,CD74,IL2RG,IRF1,RUNX1,ZFP36L1,RHOA,HMGB1,VSIR,JUN,PTPRC,GNAS,INPP5D,SYK
GO:0071621	granulocyte chemotaxis	0.00121716	0.00121716	1	CCL12,CCL9,CD74,C3AR1,C5AR1,MPP1,ITGB2,PPIB,CCL6,PREX1,SYK,FCER1G
GO:0022900	electron transport chain	0.00131799	0.00131799	1	MT-ND4,MT-ND4L,MT-ND5,MT-ND2,COX7C,MT-CO3,MT-CYTB,MT-CO1,CYCS,SDHB,MT-CO2,SH3BGRL3
GO:0006810	transport	0.00133887	0.00133887	1	CCL12,MT-ATP8,TRF,SLC6A6,PLTP,ZFP36,PICALM,NISCH,AP2A2,CD81,CD74,RHOB,CD9,H2-T23,MT-ND4,RAB7,LAMP1,MFSD1,ATP13A2,IL2RG,TAP1,FXYD2,SLC3A2,RTP4,RAB11A,YWHAE,BLOC1S1,GDI2,DDX39B,TSPO,ATP5K,ABCA1,TCIRG1,SPCS1,GPI1,ZFP36L1,LGALS3BP,ANXA5,CD14,STAB1,RHOA,TNFRSF1A,MT-ND5,LRP6,DNM2,P2RX4,ITGB2,PSAP,IFNGR1,CXCL16,ACTG1,FIS1,VDAC2,COX7C,MT-CO3,MT-CYTB,HMGB1,SLC29A1,POU2F2,MT-CO1,1810037I17RIK,CTSS,UBB,WNK1…
GO:0051241	negative regulation of multicellular organismal process	0.00139157	0.00139157	1	IGFBP5,KLF2,ID2,ZFP36,CD74,NPTN,CD9,VIM,IRF1,H2-D1,CLEC4A2,MAFB,TSPO,ADIPOR1,ZFP36L1,C1QC,ANXA5,PRDX2,SRGAP2,STAB1,RHOA,TNFRSF1A,P2RX4,H2-K1,TGFBR1,IFNGR1,HMGB1,VSIR,NME2,WNK1,YWHAH,ATP2B1,LGMN,PTPRC,TMEM176A,SEMA4A,PRKCD,GNAS,NFKBIA,TMEM176B,INPP5D,GNAI2,CALR
GO:0007568	aging	0.0013959	0.0013959	1	IGFBP5,FOS,ID2,PICALM,MT-ND4,ILK,TSPO,ITGB2,MT-CO1,JUN,ATP2B1,RPN2,GSN,CANX,PRKCD,CIITA,CD68,INPP5D,CALR
GO:0007275	multicellular organism development	0.001482	0.001482	1	IGFBP5,EGR1,MGP,FOS,CCL12,TRF,DEGS1,KLF2,ID2,ZFP36,PICALM,APLP2,AP2A2,CD81,CD74,RHOB,NPTN,CD9,NRROS,H2-T23,MT-ND4,IL2RG,C3AR1,VIM,IRF1,IER2,C5AR1,RUNX1,H2-D1,RAB11A,YWHAE,BLOC1S1,IRF2BP2,HEXB,CD79B,ILK,DDX39B,MAFB,SELENOP,TSPO,ADIPOR1,BATF3,TCIRG1,GPI1,LDHA,ZFP36L1,UBE2B,C1QC,TAOK3,PRDX2,SRGAP2,STAB1,RHOA,SERPINB6A,TNFRSF1A,LRP6,DNM2,C1QB,P2RX4,ITGB2,UBE2I,H2-K1,TGFBR1,PSAP,IFNGR1,ZFP36L2,ACTG1,P…
GO:0040012	regulation of locomotion	0.00148402	0.00148402	1	IGFBP5,EGR1,CCL12,TRF,NISCH,CD81,CD74,RHOB,CD9,C3AR1,VIM,C5AR1,RAB11A,ILK,ADIPOR1,GPI1,ANXA5,SRGAP2,MPP1,FERMT3,RHOA,P2RX4,TGFBR1,CXCL16,ACTG1,HMGB1,VSIR,JUN,WNK1,LGMN,PTPRC,MACF1,SEMA4A,PREX1,GNAI2,CALR
GO:0019538	protein metabolic process	0.00157936	0.00157936	1	IGFBP5,EGR1,CCL12,PARP14,TRF,KLF2,ZFP36,PICALM,APLP2,CCL9,CD81,CD74,NPTN,NRROS,RAB7,ATP13A2,CNDP2,VIM,IRF1,SSU72,C5AR1,RNF13,DOK2,YWHAE,ITM2B,BLOC1S1,IRF2BP2,HEXB,ILK,DDX39B,DPM3,TSPO,SUMO2,ABCA1,TCIRG1,SPCS1,GPI1,ZFP36L1,CLEC4A3,UBE2B,SCPEP1,TRMT112,TAOK3,PRDX2,RHOA,SERPINB6A,PRDX1,TNFRSF1A,LRP6,ITGB2,UBE2I,TGFBR1,EEF1B2,PSAP,IFNGR1,ZFP36L2,PPIB,FIS1,HMGB1,MORF4L1,CCL6,VSIR,RPL38,IFNAR1,RPL37,FA…
GO:0051234	establishment of localization	0.00161196	0.00161196	1	CCL12,MT-ATP8,TRF,SLC6A6,PLTP,ZFP36,PICALM,NISCH,AP2A2,CD81,CD74,RHOB,CD9,H2-T23,MT-ND4,RAB7,LAMP1,MFSD1,ATP13A2,IL2RG,TAP1,FXYD2,SLC3A2,RTP4,RAB11A,YWHAE,BLOC1S1,GDI2,DDX39B,TSPO,ATP5K,ABCA1,TCIRG1,SPCS1,GPI1,ZFP36L1,UBE2B,LGALS3BP,ANXA5,CD14,STAB1,RHOA,TNFRSF1A,MT-ND5,LRP6,DNM2,P2RX4,ITGB2,PSAP,IFNGR1,CXCL16,ACTG1,FIS1,VDAC2,COX7C,MT-CO3,MT-CYTB,HMGB1,SLC29A1,POU2F2,MT-CO1,1810037I17RIK,CTSS,UB…
GO:0048856	anatomical structure development	0.00162327	0.00162327	1	IGFBP5,EGR1,MGP,FOS,CCL12,TRF,DEGS1,PRPF40A,KLF2,ID2,ZFP36,PICALM,APLP2,CCL9,AP2A2,CD81,CD74,RHOB,NPTN,CD9,NRROS,H2-T23,MT-ND4,IL2RG,C3AR1,VIM,IRF1,IER2,C5AR1,RUNX1,H2-D1,RAB11A,YWHAE,BLOC1S1,IRF2BP2,HEXB,CD79B,ILK,DDX39B,MAFB,SELENOP,TSPO,ADIPOR1,BATF3,TCIRG1,GPI1,LDHA,ZFP36L1,UBE2B,C1QC,TAOK3,PRDX2,SRGAP2,FERMT3,STAB1,RHOA,SERPINB6A,TNFRSF1A,LRP6,DNM2,C1QB,P2RX4,ITGB2,UBE2I,H2-K1,TGFBR1,PSAP,IF…
GO:0051270	regulation of cellular component movement	0.00170696	0.00170696	1	IGFBP5,EGR1,CCL12,TRF,NISCH,CD81,CD74,RHOB,CD9,LAMP1,C3AR1,VIM,C5AR1,RAB11A,ILK,ADIPOR1,GPI1,ANXA5,SRGAP2,MPP1,FERMT3,RHOA,P2RX4,TGFBR1,CXCL16,ACTG1,HMGB1,VSIR,JUN,WNK1,LGMN,PTPRC,MACF1,SEMA4A,PREX1,GNAI2,CALR
GO:0051240	positive regulation of multicellular organismal process	0.0018278	0.0018278	1	EGR1,FOS,TRF,ID2,PICALM,CD81,CD74,RHOB,NPTN,H2-T23,IL2RG,C3AR1,VIM,IRF1,C5AR1,RUNX1,RAB11A,ILK,DDX39B,TSPO,ADIPOR1,ABCA1,GPI1,ZFP36L1,PRDX2,CD14,RHOA,TNFRSF1A,P2RX4,ITGB2,TGFBR1,IFNGR1,PPIB,HMGB1,VSIR,POU2F2,IFNAR1,MNDAL,TWF2,JUN,NME2,ATP2B1,LGMN,PTPRC,MACF1,SEMA4A,EIF2AK2,GNAS,SH3GLB1,INPP5D,GNAI2,CLIC1,SYK,FCER1G,CALR
GO:1902533	positive regulation of intracellular signal transduction	0.00188562	0.00188562	1	IGFBP5,CCL12,TRF,CCL9,CD81,CD74,C5AR1,RNF13,ILK,TAOK3,PRDX2,CD14,RHOA,TNFRSF1A,P2RX4,UBE2I,TGFBR1,PSAP,FIS1,HMGB1,CCL6,UBB,JUN,ERP29,PTPRC,PRKCD,EIF2AK2,GPX1,GNAS,GNAI2,CALM3,SYK,ATP6V0C,CALR,SPOP
GO:0019221	cytokine-mediated signaling pathway	0.00195296	0.00195296	1	EGR1,IIGP1,CCL12,PARP14,CCL9,CD74,IL2RG,IRF1,ILK,ADIPOR1,TNFRSF1A,IFNGR1,CSF2RA,CCL6,IFNAR1,WNK1,IL10RA,PTPRC,NFKBIA,SYK,FCER1G
GO:0034612	response to tumor necrosis factor	0.00213895	0.00213895	1	CCL12,KLF2,ZFP36,CCL9,IRF1,ILK,ZFP36L1,CD14,TNFRSF1A,CXCL16,ZFP36L2,CCL6,NFKBIA,SYK,PRPF8
GO:0051094	positive regulation of developmental process	0.00214321	0.00214321	1	EGR1,FOS,TRF,SLC6A6,METRNL,ID2,ZFP36,PICALM,CD74,RHOB,NPTN,IL2RG,C3AR1,VIM,IRF1,C5AR1,RUNX1,RAB11A,ILK,DDX39B,TSPO,ZFP36L1,RHOA,TNFRSF1A,DNM2,P2RX4,ITGB2,TGFBR1,PPIB,FIS1,HMGB1,VSIR,TWF2,JUN,NME2,ATP2B1,P4HB,PTPRC,MACF1,SEMA4A,PREX1,GNAS,SH3GLB1,INPP5D,CLIC1,SYK,CALR
GO:0032268	regulation of cellular protein metabolic process	0.0021684	0.0021684	1	IGFBP5,EGR1,CCL12,PARP14,TRF,ZFP36,PICALM,APLP2,CCL9,CD81,CD74,NPTN,ATP13A2,VIM,IRF1,C5AR1,DOK2,YWHAE,ILK,DDX39B,TSPO,SUMO2,GPI1,ZFP36L1,UBE2B,TAOK3,PRDX2,RHOA,SERPINB6A,PRDX1,TNFRSF1A,LRP6,ITGB2,UBE2I,TGFBR1,PSAP,ZFP36L2,FIS1,HMGB1,CCL6,VSIR,RPL38,IFNAR1,CYCS,UBB,JUN,WNK1,ERP29,PRELID1,TPR,LGMN,GSN,ARL6IP1,PTPRC,PRKCD,SRP9,EIF2AK2,TMEM59,GPX1,CSNK1A1,KMT2E,GNAS,PPP1CA,NFKBIA,GNAI2,CALM3,SYK,ATP6…
GO:0071248	cellular response to metal ion	0.00218025	0.00218025	1	FOS,TRF,ID2,ATP13A2,TSPO,RASA4,P2RX4,MT1,JUN,WNK1,ALOX5AP,LGMN,GSN,CALR
GO:0051173	positive regulation of nitrogen compound metabolic process	0.00225243	0.00225243	1	EGR1,FOS,CCL12,PARP14,TRF,KLF2,ID2,ZFP36,PICALM,CCL9,CD81,CD74,NPTN,RAB7,C3AR1,VIM,IRF1,IER2,C5AR1,RUNX1,HEXB,ILK,DDX39B,MAFB,SUMO2,ZFP36L1,UBE2B,TRMT112,TAOK3,PRDX2,RHOA,TNFRSF1A,LRP6,DNM2,GLMP,ITGB2,UBE2I,TGFBR1,PSAP,IFNGR1,ZFP36L2,SNRNP70,FIS1,HMGB1,CCL6,VSIR,POU2F2,IFNAR1,TRA2B,CYCS,UBB,JUN,TCEA1,NME2,WNK1,ERP29,YWHAH,PRELID1,TACC1,LGMN,GSN,TAF6L,PTPRC,PRKCD,EIF2AK2,CIITA,CSNK1A1,KMT2E,HNRNPA…
GO:0071241	cellular response to inorganic substance	0.00226098	0.00226098	1	FOS,TRF,ID2,ATP13A2,TSPO,RASA4,DNM2,P2RX4,MT1,JUN,WNK1,ALOX5AP,LGMN,GSN,CALR
GO:0050776	regulation of immune response	0.00250173	0.00250173	1	PARP14,CD81,CD74,BLNK,H2-T23,IFI213,LAMP1,TAP1,C3AR1,IRF1,C5AR1,H2-D1,CD79B,IFI203,FYB,C1QC,CD48,C1QB,ITGB2,H2-K1,HMGB1,VSIR,MNDAL,WNK1,PTPRC,CD37,GPX1,INPP5D,SYK,FCER1G
GO:0046034	ATP metabolic process	0.00254652	0.00254652	1	MT-ATP8,MT-ND4,TSPO,ATP5K,MT-ND4L,GPI1,LDHA,RHOA,MT-ND5,MT-ND2,COX7C,MT-CO3,MT-CYTB,MT-CO1,CYCS,MT-CO2
GO:0006979	response to oxidative stress	0.00256346	0.00256346	1	FOS,KLF2,RHOB,MT-ND1,ATP13A2,HMOX2,LDHA,PRDX2,MT-ND3,PRDX1,MT-ND5,DNM2,PSAP,MT-CO1,TRA2B,JUN,NME2,P4HB,PRKCD,GPX1,ALDH2,GPX3
GO:0002443	leukocyte mediated immunity	0.00284808	0.00284808	1	CD81,CD74,H2-T23,LAMP1,TAP1,H2-D1,TCIRG1,C1QC,PRDX1,C1QB,ITGB2,H2-K1,HMGB1,VSIR,POU2F2,WDR1,PTPRC,PRKCD,KMT2E,INPP5D,SYK,FCER1G
GO:0010604	positive regulation of macromolecule metabolic process	0.00295437	0.00295437	1	EGR1,FOS,CCL12,PARP14,TRF,KLF2,ID2,ZFP36,PICALM,CCL9,CD81,CD74,NPTN,H2-T23,RAB7,ATP13A2,IL2RG,C3AR1,VIM,IRF1,IER2,C5AR1,RUNX1,HEXB,ILK,FAM46A,DDX39B,MAFB,SUMO2,ZFP36L1,UBE2B,TRMT112,TAOK3,PRDX2,CD14,RHOA,TNFRSF1A,LRP6,GLMP,UBE2I,TGFBR1,PSAP,IFNGR1,ZFP36L2,ACTG1,SNRNP70,FIS1,HMGB1,CCL6,VSIR,POU2F2,IFNAR1,TRA2B,CYCS,MNDAL,UBB,JUN,TCEA1,NME2,WNK1,ERP29,YWHAH,PRELID1,TACC1,LGMN,GSN,TAF6L,PTPRC,PRKCD,…
GO:0009725	response to hormone	0.00317015	0.00317015	1	IGFBP5,EGR1,FOS,ZFP36,IRF1,TSPO,ADIPOR1,GPI1,LDHA,ZFP36L1,ANXA5,MT-ND3,RHOA,LRP6,UBE2I,TGFBR1,ZFP36L2,MT-CYTB,HMGB1,CTSS,JUN,NME2,YWHAH,ATP2B1,PRKCD,H3F3A,YWHAG,NR3C1,GNAS,PTPRE,GNAI2,CALM3,CALR
GO:0044093	positive regulation of molecular function	0.00332432	0.00332432	1	EGR1,CCL12,TRF,PICALM,CCL9,CD81,CD74,STARD8,ILK,GDI2,DPM3,RASA4,TAOK3,PRDX2,SRGAP2,RHOA,LRP6,DNM2,ITGB2,UBE2I,TGFBR1,PSAP,IFNGR1,FIS1,HMGB1,CCL6,VSIR,CTSS,CYCS,JUN,TCEA1,DDOST,WNK1,ALOX5AP,ERP29,PRELID1,TACC1,LGMN,GSN,GM2A,PTPRC,PRKCD,EIF2AK2,TOR1AIP1,PREX1,GNAS,SH3GLB1,GNAI2,CALM3,SYK
GO:0048869	cellular developmental process	0.00350778	0.00350778	1	IGFBP5,EGR1,MGP,FOS,CCL12,TRF,SLC6A6,METRNL,KLF2,ID2,ZFP36,PICALM,CCL9,AP2A2,CD81,CD74,RHOB,NPTN,CD9,NRROS,IL2RG,VIM,IRF1,IER2,C5AR1,RUNX1,H2-D1,RAB11A,YWHAE,BLOC1S1,IRF2BP2,HEXB,CD79B,ILK,DDX39B,MAFB,TSPO,ADIPOR1,BATF3,TCIRG1,ZFP36L1,UBE2B,C1QC,TAOK3,PRDX2,SRGAP2,FERMT3,RHOA,TNFRSF1A,LRP6,DNM2,P2RX4,ITGB2,H2-K1,TGFBR1,PSAP,IFNGR1,ZFP36L2,ACTG1,FIS1,HMGB1,VSIR,POU2F2,UBB,TWF2,JUN,TCEA1,NME2,WDR1,…
GO:1902600	proton transmembrane transport	0.00374644	0.00374644	1	MT-ATP8,MT-ND4,ATP5K,TCIRG1,MT-ND5,COX7C,MT-CO3,MT-CYTB,MT-CO1,ATP6V0B,MT-CO2,ATP6V0C
GO:0048872	homeostasis of number of cells	0.00385391	0.00385391	1	KLF2,TSC22D3,ID2,ZFP36,CD74,MAFB,TCIRG1,GPI1,ZFP36L1,PRDX2,PRDX1,HMGB1,TCEA1,UBAP2L,KMT2E,INPP5D,FCER1G
GO:0070727	cellular macromolecule localization	0.00415275	0.00415275	1	ZFP36,PICALM,AP2A2,CD81,CD74,RHOB,RAB7,LAMP1,ATP13A2,RTP4,RAB11A,YWHAE,DDX39B,TSPO,SUMO2,SPCS1,ZFP36L1,FYB,TNFRSF1A,LRP6,DNM2,ITGB2,PSAP,FIS1,TWF2,M6PR,SEC62,YWHAH,SRP14,TPR,GSN,ARL6IP1,IL10RA,MACF1,PRKCD,SRP9,TMEM59,TOR1AIP1,MYL12A,TM9SF2,YWHAG,SH3GLB1,NFKBIA,CD68,SEC61B,RAB14,CALM3,SYK,FCER1G,CALR,TOMM22
GO:0006518	peptide metabolic process	0.00427341	0.00427341	1	IGFBP5,ZFP36,PICALM,VIM,DDX39B,SPCS1,ZFP36L1,RHOA,EEF1B2,IFNGR1,ZFP36L2,RPL38,RPL37,RPL6,TPR,SRP9,EIF2AK2,GPX1,RPSA,RPL15,RPL23A,PPP1CA,MRPS21,RPL18,EIF4A1,MRPL30,CALR,RPS26,GPX3,RPS5
GO:0045597	positive regulation of cell differentiation	0.00438391	0.00438391	1	FOS,TRF,SLC6A6,METRNL,ID2,ZFP36,PICALM,CD74,NPTN,IL2RG,VIM,IRF1,RUNX1,RAB11A,ILK,DDX39B,TSPO,ZFP36L1,RHOA,DNM2,P2RX4,TGFBR1,HMGB1,VSIR,TWF2,JUN,NME2,P4HB,PTPRC,MACF1,PREX1,GNAS,SH3GLB1,INPP5D,CLIC1,SYK,CALR
GO:0080134	regulation of response to stress	0.00453541	0.00453541	1	IER3,PARP14,TRF,METRNL,ZFP36,CD81,CD74,CD9,H2-T23,IFI213,LAMP1,TAP1,IRF1,RNF13,DDX39B,IFI203,ANXA5,TAOK3,PRDX2,PRDX1,TNFRSF1A,PSAP,ACTG1,HMGB1,GRINA,CTSS,MNDAL,ALOX5AP,ERP29,P4HB,PCBP2,CD37,ZYX,PRKCD,EIF2AK2,GPX1,ALDH2,NFKBIA,SYK,FCER1G,TNFAIP8L2,SPOP
GO:0002761	regulation of myeloid leukocyte differentiation	0.00464282	0.00464282	1	FOS,ID2,CD74,RUNX1,MAFB,ZFP36L1,C1QC,JUN,NME2,GNAS,INPP5D
GO:0033993	response to lipid	0.00483487	0.00483487	1	FOS,CCL12,ZFP36,VIM,TSPO,ABCA1,GPI1,ZFP36L1,PRDX2,CD14,MT-ND3,RHOA,LRP6,UBE2I,TGFBR1,CXCL16,ZFP36L2,FIS1,HMGB1,IFNAR1,TWF2,JUN,NME2,YWHAH,ATP2B1,EIF2AK2,NR3C1,GNAS,NFKBIA,CD68,LY86,CALM3,CALR,PRPF8
GO:0045577	regulation of B cell differentiation	0.00488384	0.00488384	1	ID2,IL2RG,ZFP36L1,ZFP36L2,INPP5D,SYK
GO:0009060	aerobic respiration	0.00495966	0.00495966	1	MT-ND1,MT-ND4,BLOC1S1,COX7C,MT-CO3,MT-CO1,CYCS,SDHB,MDH1
GO:0030154	cell differentiation	0.00520222	0.00520222	1	IGFBP5,EGR1,MGP,FOS,CCL12,TRF,SLC6A6,METRNL,KLF2,ID2,ZFP36,PICALM,CCL9,AP2A2,CD81,CD74,RHOB,NPTN,CD9,NRROS,IL2RG,VIM,IRF1,IER2,C5AR1,RUNX1,H2-D1,RAB11A,YWHAE,BLOC1S1,IRF2BP2,HEXB,CD79B,ILK,DDX39B,MAFB,TSPO,ADIPOR1,BATF3,TCIRG1,ZFP36L1,UBE2B,C1QC,TAOK3,PRDX2,SRGAP2,FERMT3,RHOA,TNFRSF1A,LRP6,DNM2,P2RX4,ITGB2,H2-K1,TGFBR1,PSAP,IFNGR1,ZFP36L2,ACTG1,HMGB1,VSIR,POU2F2,UBB,TWF2,JUN,TCEA1,NME2,WDR1,YWHAH…
GO:0042590	antigen processing and presentation of exogenous peptide antigen via MHC class I	0.00562852	0.00562852	1	TAP1,CLEC4A2,H2-K1,FCER1G
GO:0034341	response to interferon-gamma	0.00565549	0.00565549	1	CCL12,PARP14,CCL9,VIM,IRF1,GBP7,CXCL16,ACTG1,CCL6,GSN,ZYX,CIITA
GO:0071346	cellular response to interferon-gamma	0.00583896	0.00583896	1	CCL12,PARP14,CCL9,VIM,IRF1,GBP7,ACTG1,CCL6,GSN,ZYX,CIITA
GO:1901564	organonitrogen compound metabolic process	0.00634162	0.00634162	1	IGFBP5,EGR1,CCL12,MT-ATP8,PARP14,TRF,DEGS1,KLF2,ZFP36,PICALM,APLP2,CCL9,CMPK1,CD81,CD74,NPTN,NRROS,RAB7,ATP13A2,CNDP2,VIM,IRF1,SSU72,C5AR1,RNF13,DOK2,YWHAE,ITM2B,BLOC1S1,IRF2BP2,HMOX2,HEXB,ILK,DDX39B,DPM3,TSPO,ATP5K,SUMO2,ABCA1,TCIRG1,SPCS1,GPI1,ZFP36L1,CLEC4A3,UBE2B,SCPEP1,TRMT112,TAOK3,PRDX2,RHOA,SERPINB6A,PRDX1,TNFRSF1A,LRP6,ITGB2,UBE2I,TGFBR1,EEF1B2,PSAP,IFNGR1,ZFP36L2,PPIB,FIS1,HMGB1,MORF4L1…
GO:0062197	cellular response to chemical stress	0.00640431	0.00640431	1	FOS,KLF2,RHOB,ATP13A2,FXYD2,TSPO,ZFP36L1,PRDX2,SERPINB6A,PRDX1,DNM2,PSAP,JUN,NME2,P4HB,PRKCD,GPX1,ALDH2
GO:0035456	response to interferon-beta	0.00654805	0.00654805	1	IFIT3,IIGP1,IGTP,XAF1,IFI213,IRF1,IFI203,MNDAL
GO:0032103	positive regulation of response to external stimulus	0.00693054	0.00693054	1	CD81,CD74,H2-T23,IFI213,LAMP1,C3AR1,C5AR1,IFI203,TNFRSF1A,P2RX4,HMGB1,CTSS,MNDAL,WNK1,ALOX5AP,LGMN,NFKBIA,LY86,FCER1G,CALR
GO:0010467	gene expression	0.00702871	0.00702871	1	IGFBP5,EGR1,FOS,PARP14,TRF,PRPF40A,KLF2,TSC22D3,ID2,ZFP36,PICALM,CD81,CD74,NPTN,NRROS,H2-T23,IFI213,ATP13A2,IL2RG,BRD2,C3AR1,VIM,IRF1,SSU72,IER2,C5AR1,RUNX1,CLEC4A2,IRF2BP2,HEXB,ILK,FAM46A,DDX39B,MAFB,TSPO,BATF3,SUMO2,ABCA1,TCIRG1,SPCS1,ZFP36L1,UBE2B,TRMT112,PRDX2,CD14,POLR1D,U2AF1,RHOA,TNFRSF1A,LRP6,GLMP,ITGB2,UBE2I,TGFBR1,EEF1B2,IFNGR1,ZFP36L2,ACTG1,SNRNP70,CELF2,HMGB1,MORF4L1,VSIR,POU2F2,RPL38…
GO:0002237	response to molecule of bacterial origin	0.00789267	0.00789267	1	FOS,CCL12,ZFP36,VIM,C5AR1,TSPO,ABCA1,PRDX2,CD14,RHOA,CXCL16,HMGB1,IFNAR1,JUN,EIF2AK2,NFKBIA,CD68,LY86,PRPF8
GO:0043603	cellular amide metabolic process	0.00926117	0.00926117	1	IGFBP5,DEGS1,ZFP36,PICALM,VIM,HEXB,DDX39B,SPCS1,ZFP36L1,RHOA,EEF1B2,PSAP,IFNGR1,ZFP36L2,RPL38,RPL37,RPL6,TPR,GM2A,PRKCD,SRP9,EIF2AK2,GPX1,RPSA,RPL15,RPL23A,PPP1CA,MRPS21,RPL18,EIF4A1,MRPL30,CALR,RPS26,GPX3,RPS5
GO:0045637	regulation of myeloid cell differentiation	0.00936706	0.00936706	1	FOS,ID2,ZFP36,CD74,RUNX1,MAFB,ZFP36L1,C1QC,HMGB1,JUN,NME2,GNAS,NFKBIA,INPP5D
GO:0051345	positive regulation of hydrolase activity	0.00955794	0.00955794	1	CCL12,PICALM,CCL9,STARD8,GDI2,RASA4,SRGAP2,RHOA,PSAP,FIS1,HMGB1,CCL6,VSIR,CYCS,JUN,TCEA1,PRELID1,LGMN,GSN,GM2A,PTPRC,PRKCD,TOR1AIP1,PREX1,GNAS,CALM3,SYK
GO:0045184	establishment of protein localization	0.00981973	0.00981973	1	PICALM,AP2A2,CD81,CD74,RHOB,H2-T23,RAB7,LAMP1,ATP13A2,TAP1,RTP4,RAB11A,YWHAE,GDI2,DDX39B,TSPO,ABCA1,TCIRG1,SPCS1,GPI1,ANXA5,CD14,TNFRSF1A,DNM2,PSAP,IFNGR1,FIS1,HMGB1,POU2F2,M6PR,SEC62,ERP29,YWHAH,SRP14,TPR,ARL6IP1,IL10RA,MACF1,PRKCD,SRP9,YWHAG,SH3GLB1,NFKBIA,CD68,SEC61B,RAB14,CALM3,BTF3,SYK,CALR,TOMM22
GO:0007166	cell surface receptor signaling pathway	0.0100737	0.0100737	1	IGFBP5,EGR1,IIGP1,FOS,CCL12,PARP14,TRF,APLP2,CCL9,CD81,CD74,BLNK,NPTN,NRROS,RAB7,IL2RG,BCL2A1B,C3AR1,VIM,IRF1,C5AR1,DOK2,CD79B,ILK,ADIPOR1,ABCA1,ADGRE1,FYB,UBE2B,PRDX2,CD14,FERMT3,RHOA,TNFRSF1A,LRP6,DNM2,P2RX4,ITGB2,TGFBR1,IFNGR1,CSF2RA,CCL6,VSIR,SLC29A1,IFNAR1,JUN,NME2,WNK1,PEA15A,LGMN,IL10RA,PTPRC,SEMA4A,ZYX,PRKCD,GPX1,CSNK1A1,PPP1CA,SH3GLB1,NFKBIA,PTPRE,GNAI2,LY86,RAB14,SYK,FCER1G,ATP6V0C
GO:0030183	B cell differentiation	0.0104398	0.0104398	1	ID2,IL2RG,IRF2BP2,CD79B,TCIRG1,ZFP36L1,ZFP36L2,POU2F2,PTPRC,INPP5D,SYK
GO:0044237	cellular metabolic process	0.0106893	0.0106893	1	IGFBP5,EGR1,IIGP1,FOS,CCL12,MT-ATP8,PARP14,TRF,DEGS1,PRPF40A,KLF2,TSC22D3,ID2,PLTP,ZFP36,PICALM,APLP2,CCL9,CMPK1,CD81,CD74,SLFN8,NPTN,CD9,NRROS,MT-ND1,MT-ND4,IFI213,RAB7,ATP13A2,BRD2,C3AR1,VIM,IRF1,SSU72,IER2,C5AR1,RUNX1,RNF13,DOK2,YWHAE,ITM2B,BLOC1S1,IRF2BP2,HMOX2,HEXB,ILK,FAM46A,DDX39B,MAFB,SELENOP,DPM3,TSPO,ATP5K,MT-ND4L,ADIPOR1,BATF3,SUMO2,ABCA1,TCIRG1,SPCS1,GPI1,LDHA,ZFP36L1,UBE2B,SCPEP1,TRM…
GO:0051247	positive regulation of protein metabolic process	0.0108124	0.0108124	1	EGR1,CCL12,PARP14,TRF,KLF2,PICALM,CCL9,CD81,CD74,NPTN,RAB7,VIM,C5AR1,ILK,DDX39B,SUMO2,TAOK3,PRDX2,RHOA,TNFRSF1A,UBE2I,TGFBR1,PSAP,IFNGR1,FIS1,HMGB1,CCL6,VSIR,CYCS,UBB,JUN,WNK1,ERP29,PRELID1,LGMN,GSN,PTPRC,PRKCD,EIF2AK2,CSNK1A1,KMT2E,WWP1,GNAS,NFKBIA,GNAI2,CALM3,SYK,ATP6V0C
GO:0001817	regulation of cytokine production	0.0111468	0.0111468	1	EGR1,KLF2,ZFP36,CD81,CD74,NPTN,H2-T23,C3AR1,IRF1,C5AR1,RUNX1,CLEC4A2,TSPO,CD14,TNFRSF1A,IFNGR1,HMGB1,VSIR,POU2F2,IFNAR1,MNDAL,ATP2B1,PTPRC,EIF2AK2,INPP5D,SYK,FCER1G
GO:0065007	biological regulation	0.011893	0.011893	1	IGFBP5,EGR1,MGP,IFIT3,IIGP1,IER3,FOS,CCL12,PARP14,XAF1,TRF,DEGS1,SLC6A6,PRPF40A,METRNL,KLF2,TSC22D3,ID2,PLTP,ZFP36,PICALM,APLP2,CCL9,NISCH,AP2A2,CD81,CD74,BLNK,RHOB,NPTN,CD9,NRROS,H2-T23,IFI213,RAB7,LAMP1,ATP13A2,IL2RG,BCL2A1B,CAPG,TAP1,BRD2,C3AR1,FXYD2,VIM,IRF1,UNC93B1,SP110,DOK3,SSU72,IER2,C5AR1,RUNX1,RNF13,H2-D1,CLEC4A2,RAB11A,DOK2,YWHAE,ITM2B,IRF2BP2,HMOX2,HEXB,STARD8,CD79B,ILK,FAM46A,GDI2,DD…
GO:1902531	regulation of intracellular signal transduction	0.0122823	0.0122823	1	IGFBP5,CCL12,TRF,CCL9,CD81,CD74,C5AR1,RNF13,DOK2,STARD8,ILK,RASA4,ADIPOR1,ABCA1,UBE2B,TAOK3,PRDX2,CD14,RHOA,PRDX1,TNFRSF1A,DNM2,P2RX4,UBE2I,TGFBR1,PSAP,FIS1,VDAC2,HMGB1,CCL6,GRINA,UBB,JUN,ERP29,P4HB,PTPRC,PRKCD,EIF2AK2,GPX1,GNAS,GNAI2,CALM3,SYK,ATP6V0C,CALR,SPOP
GO:0002262	myeloid cell homeostasis	0.0129529	0.0129529	1	KLF2,ID2,ZFP36,MAFB,GPI1,ZFP36L1,PRDX1,HMGB1,TCEA1,KMT2E,INPP5D,FCER1G
GO:0046640	regulation of alpha-beta T cell proliferation	0.0135145	0.0135145	1	CD81,H2-T23,IRF1,VSIR,PTPRC,SYK
GO:0008104	protein localization	0.013765	0.013765	1	PICALM,AP2A2,CD81,CD74,RHOB,NPTN,NRROS,H2-T23,RAB7,LAMP1,ATP13A2,TAP1,RTP4,RAB11A,YWHAE,GDI2,DDX39B,TSPO,SUMO2,ABCA1,TCIRG1,SPCS1,GPI1,FYB,ANXA5,CD14,TNFRSF1A,LRP6,DNM2,ITGB2,PSAP,IFNGR1,ACTG1,FIS1,HMGB1,POU2F2,TWF2,M6PR,SEC62,ERP29,YWHAH,SRP14,TPR,GSN,ARL6IP1,IL10RA,MACF1,PRKCD,SRP9,TMEM59,TOR1AIP1,MYL12A,TM9SF2,YWHAG,SH3GLB1,NFKBIA,CD68,SEC61B,RAB14,CALM3,BTF3,SYK,FCER1G,CALR,TOMM22
GO:0051049	regulation of transport	0.0138967	0.0138967	1	CCL12,TRF,PLTP,PICALM,CD81,CD74,H2-T23,RAB7,LAMP1,ATP13A2,IL2RG,FXYD2,RAB11A,YWHAE,TSPO,ABCA1,TCIRG1,GPI1,ANXA5,CD14,RHOA,TNFRSF1A,DNM2,P2RX4,ITGB2,IFNGR1,ACTG1,FIS1,HMGB1,1810037I17RIK,CTSS,WNK1,WDR1,ERP29,YWHAH,ATP2B1,PRELID1,TPR,TMEM37,PEA15A,ARL6IP1,PTPRC,PRKCD,GNAS,SH3GLB1,NFKBIA,GNAI2,CALM3,CLIC1,SYK,FCER1G,CALR
GO:0031325	positive regulation of cellular metabolic process	0.0139951	0.0139951	1	EGR1,FOS,CCL12,PARP14,TRF,KLF2,ID2,ZFP36,PICALM,CCL9,CD81,CD74,NPTN,C3AR1,VIM,IRF1,IER2,C5AR1,RUNX1,HEXB,ILK,DDX39B,MAFB,TSPO,SUMO2,ZFP36L1,UBE2B,TRMT112,TAOK3,PRDX2,RHOA,TNFRSF1A,LRP6,DNM2,GLMP,ITGB2,UBE2I,TGFBR1,PSAP,IFNGR1,ZFP36L2,SNRNP70,FIS1,HMGB1,CCL6,VSIR,POU2F2,IFNAR1,TRA2B,CYCS,UBB,JUN,TCEA1,NME2,WNK1,ERP29,YWHAH,PRELID1,TACC1,LGMN,GSN,TAF6L,PTPRC,PRKCD,EIF2AK2,TMEM59,CIITA,CSNK1A1,KMT2E…
GO:0071222	cellular response to lipopolysaccharide	0.0140501	0.0140501	1	CCL12,ZFP36,VIM,TSPO,ABCA1,PRDX2,CD14,RHOA,CXCL16,HMGB1,NFKBIA,CD68,LY86,PRPF8
GO:0071216	cellular response to biotic stimulus	0.0144685	0.0144685	1	CCL12,ZFP36,VIM,TSPO,ABCA1,PRDX2,CD14,RHOA,CXCL16,HMGB1,NFKBIA,CD68,LY86,SYK,PRPF8
GO:0006412	translation	0.0145082	0.0145082	1	IGFBP5,ZFP36,VIM,DDX39B,ZFP36L1,RHOA,EEF1B2,ZFP36L2,RPL38,RPL37,RPL6,TPR,SRP9,EIF2AK2,RPSA,RPL15,RPL23A,PPP1CA,MRPS21,RPL18,EIF4A1,MRPL30,CALR,RPS26,RPS5
GO:0032680	regulation of tumor necrosis factor production	0.0146108	0.0146108	1	ZFP36,H2-T23,CLEC4A2,TSPO,CD14,TNFRSF1A,IFNGR1,HMGB1,VSIR,PTPRC,SYK,FCER1G
GO:0033036	macromolecule localization	0.0153054	0.0153054	1	PLTP,ZFP36,PICALM,AP2A2,CD81,CD74,RHOB,NPTN,NRROS,H2-T23,RAB7,LAMP1,ATP13A2,TAP1,RTP4,RAB11A,YWHAE,HEXB,GDI2,DDX39B,TSPO,SUMO2,ABCA1,TCIRG1,SPCS1,GPI1,ZFP36L1,FYB,ANXA5,CD14,TNFRSF1A,LRP6,DNM2,ITGB2,PSAP,IFNGR1,ACTG1,FIS1,HMGB1,POU2F2,TWF2,M6PR,SEC62,ERP29,YWHAH,PRELID1,SRP14,TPR,GSN,ARL6IP1,GM2A,IL10RA,MACF1,PRKCD,SRP9,TMEM59,TOR1AIP1,MYL12A,TM9SF2,YWHAG,SH3GLB1,NFKBIA,CD68,SEC61B,RAB14,CALM3,BT…
GO:0010647	positive regulation of cell communication	0.0153257	0.0153257	1	IGFBP5,CCL12,PARP14,TRF,KLF2,CCL9,CD81,CD74,NPTN,C5AR1,RNF13,ILK,ADIPOR1,UBE2B,TAOK3,PRDX2,CD14,RHOA,TNFRSF1A,P2RX4,UBE2I,TGFBR1,PSAP,IFNGR1,FIS1,HMGB1,CCL6,VSIR,UBB,JUN,WNK1,ERP29,PEA15A,LGMN,GSN,IL10RA,PTPRC,PRKCD,EIF2AK2,GPX1,GNAS,PPP1CA,SH3GLB1,GNAI2,LY86,CALM3,SYK,ATP6V0C,CALR,SPOP
GO:0008152	metabolic process	0.0156109	0.0156109	1	IGFBP5,EGR1,IIGP1,FOS,CCL12,MT-ATP8,PARP14,TRF,DEGS1,PRPF40A,KLF2,TSC22D3,ID2,PLTP,ZFP36,PICALM,APLP2,CCL9,NISCH,CMPK1,CD81,CD74,SLFN8,NPTN,CD9,NRROS,H2-T23,MT-ND1,MT-ND4,IFI213,RAB7,ATP13A2,IL2RG,CNDP2,BRD2,C3AR1,VIM,IRF1,SSU72,IER2,SLC3A2,C5AR1,RUNX1,RNF13,CLEC4A2,DOK2,YWHAE,ITM2B,BLOC1S1,IRF2BP2,HMOX2,HEXB,ILK,FAM46A,DDX39B,MAFB,SELENOP,DPM3,TSPO,NDUFC1,ATP5K,MT-ND4L,ADIPOR1,BATF3,SUMO2,ABCA1,…
GO:0071356	cellular response to tumor necrosis factor	0.0156871	0.0156871	1	CCL12,KLF2,ZFP36,CCL9,IRF1,ILK,ZFP36L1,TNFRSF1A,ZFP36L2,CCL6,NFKBIA,SYK,PRPF8
GO:0035458	cellular response to interferon-beta	0.0160763	0.0160763	1	IFIT3,IIGP1,IGTP,IFI213,IRF1,IFI203,MNDAL
GO:1903555	regulation of tumor necrosis factor superfamily cytokine production	0.016452	0.016452	1	ZFP36,H2-T23,CLEC4A2,TSPO,CD14,TNFRSF1A,IFNGR1,HMGB1,VSIR,PTPRC,SYK,FCER1G
GO:0032496	response to lipopolysaccharide	0.0167233	0.0167233	1	FOS,CCL12,ZFP36,VIM,TSPO,ABCA1,PRDX2,CD14,RHOA,CXCL16,HMGB1,IFNAR1,JUN,EIF2AK2,NFKBIA,CD68,LY86,PRPF8
GO:0023056	positive regulation of signaling	0.0167604	0.0167604	1	IGFBP5,CCL12,PARP14,TRF,KLF2,CCL9,CD81,CD74,NPTN,C5AR1,RNF13,ILK,ADIPOR1,UBE2B,TAOK3,PRDX2,CD14,RHOA,TNFRSF1A,P2RX4,UBE2I,TGFBR1,PSAP,IFNGR1,FIS1,HMGB1,CCL6,VSIR,UBB,JUN,WNK1,ERP29,PEA15A,LGMN,GSN,IL10RA,PTPRC,PRKCD,EIF2AK2,GPX1,GNAS,PPP1CA,SH3GLB1,GNAI2,LY86,CALM3,SYK,ATP6V0C,CALR,SPOP
GO:2001233	regulation of apoptotic signaling pathway	0.0167636	0.0167636	1	CD74,PRDX2,TGFBR1,FIS1,VDAC2,GRINA,UBB,ERP29,PRELID1,P4HB,PEA15A,GSN,PTPRC,PRKCD,GPX1,PPP1CA,SH3GLB1,GNAI2,SPOP
GO:0034613	cellular protein localization	0.0171572	0.0171572	1	PICALM,AP2A2,CD81,CD74,RHOB,RAB7,LAMP1,ATP13A2,RTP4,RAB11A,YWHAE,DDX39B,TSPO,SUMO2,SPCS1,FYB,TNFRSF1A,LRP6,DNM2,ITGB2,PSAP,FIS1,TWF2,M6PR,SEC62,YWHAH,SRP14,TPR,GSN,ARL6IP1,IL10RA,MACF1,PRKCD,SRP9,TMEM59,TOR1AIP1,MYL12A,TM9SF2,YWHAG,SH3GLB1,NFKBIA,CD68,SEC61B,RAB14,CALM3,SYK,FCER1G,CALR,TOMM22
GO:0033554	cellular response to stress	0.0172657	0.0172657	1	EGR1,IER3,FOS,TRF,KLF2,ID2,ZFP36,CD74,RHOB,NRROS,ATP13A2,BCL2A1B,FXYD2,RNF13,YWHAE,DDX39B,TSPO,ZFP36L1,UBE2B,TAOK3,PRDX2,RHOA,SERPINB6A,PRDX1,TNFRSF1A,DNM2,PSAP,HMGB1,MORF4L1,GRINA,SLC29A1,JUN,NME2,ERP29,P4HB,TPR,PEA15A,CANX,PRKCD,EIF2AK2,GPX1,ALDH2,SHISA5,SH3GLB1,SEC61B,CRIP1,SYK,CALR,HP1BP3,SPOP
GO:0002449	lymphocyte mediated immunity	0.0193397	0.0193397	1	CD81,CD74,H2-T23,LAMP1,TAP1,H2-D1,TCIRG1,C1QC,PRDX1,C1QB,H2-K1,HMGB1,VSIR,POU2F2,PTPRC,PRKCD,INPP5D,FCER1G
GO:0032640	tumor necrosis factor production	0.0195951	0.0195951	1	ZFP36,H2-T23,CLEC4A2,TSPO,CD14,TNFRSF1A,IFNGR1,HMGB1,VSIR,PTPRC,SYK,FCER1G
GO:0071219	cellular response to molecule of bacterial origin	0.0197423	0.0197423	1	CCL12,ZFP36,VIM,TSPO,ABCA1,PRDX2,CD14,RHOA,CXCL16,HMGB1,NFKBIA,CD68,LY86,PRPF8
GO:0006812	cation transport	0.0202059	0.0202059	1	CCL12,MT-ATP8,TRF,SLC6A6,MT-ND4,ATP13A2,FXYD2,SLC3A2,YWHAE,TSPO,ATP5K,TCIRG1,ANXA5,RHOA,MT-ND5,DNM2,P2RX4,IFNGR1,COX7C,MT-CO3,MT-CYTB,MT-CO1,1810037I17RIK,CTSS,WNK1,YWHAH,ATP2B1,TMEM37,PTPRC,GNAS,GNAI2,ATP6V0B,CALM3,SYK,MT-CO2,FCER1G,ATP6V0C
GO:0043069	negative regulation of programmed cell death	0.0202807	0.0202807	1	IFIT3,IER3,CCL12,TSC22D3,CD74,BCL2A1B,C5AR1,ILK,GPI1,UBE2B,PRDX2,RHOA,TNFRSF1A,LRP6,TGFBR1,VDAC2,GRINA,MT1,JUN,NME2,YWHAH,PRELID1,PEA15A,LGMN,ARL6IP1,PRKCD,EIF2AK2,SON,GPX1,ALDH2,GNAI2,FCER1G,ATP6V0C
GO:0046634	regulation of alpha-beta T cell activation	0.0204155	0.0204155	1	CD81,H2-T23,IL2RG,IRF1,RHOA,HMGB1,VSIR,PTPRC,SYK
GO:0031347	regulation of defense response	0.0208738	0.0208738	1	PARP14,METRNL,ZFP36,CD81,CD74,H2-T23,IFI213,LAMP1,TAP1,IRF1,IFI203,TNFRSF1A,HMGB1,CTSS,MNDAL,ALOX5AP,PCBP2,CD37,ZYX,GPX1,ALDH2,NFKBIA,FCER1G,TNFAIP8L2
GO:0009966	regulation of signal transduction	0.021077	0.021077	1	IGFBP5,EGR1,CCL12,PARP14,TRF,KLF2,APLP2,CCL9,CD81,CD74,NPTN,NRROS,RAB7,IRF1,C5AR1,RNF13,DOK2,STARD8,ILK,RASA4,ADIPOR1,ABCA1,UBE2B,TAOK3,PRDX2,CD14,RHOA,PRDX1,TNFRSF1A,DNM2,P2RX4,UBE2I,TGFBR1,PSAP,IFNGR1,FIS1,VDAC2,HMGB1,CCL6,VSIR,GRINA,UBB,JUN,WNK1,ERP29,PRELID1,P4HB,PEA15A,LGMN,GSN,IL10RA,PTPRC,PRKCD,EIF2AK2,GPX1,CSNK1A1,GNAS,PPP1CA,SH3GLB1,NFKBIA,PTPRE,INPP5D,GNAI2,LY86,CALM3,SYK,ATP6V0C,CALR,S…
GO:0071705	nitrogen compound transport	0.0221011	0.0221011	1	SLC6A6,PLTP,ZFP36,PICALM,NISCH,AP2A2,CD81,CD74,RHOB,H2-T23,RAB7,ATP13A2,TAP1,SLC3A2,RTP4,RAB11A,YWHAE,GDI2,DDX39B,ABCA1,TCIRG1,SPCS1,GPI1,ZFP36L1,ANXA5,CD14,TNFRSF1A,DNM2,PSAP,IFNGR1,FIS1,HMGB1,SLC29A1,POU2F2,M6PR,SEC62,ERP29,YWHAH,SRP14,TPR,ARL6IP1,IL10RA,MACF1,PRKCD,SRP9,YWHAG,SH3GLB1,NFKBIA,SEC61B,RAB14,BTF3,SYK,FCER1G,CALR,G3BP2,TOMM22
GO:0072657	protein localization to membrane	0.0228078	0.0228078	1	PICALM,CD81,RTP4,RAB11A,FYB,TNFRSF1A,LRP6,ITGB2,FIS1,SEC62,SRP14,GSN,ARL6IP1,MACF1,SRP9,TMEM59,MYL12A,TM9SF2,SH3GLB1,SEC61B,CALM3,FCER1G,TOMM22
GO:0016310	phosphorylation	0.0229056	0.0229056	1	EGR1,CCL12,PARP14,TRF,ZFP36,APLP2,CCL9,CMPK1,CD81,CD74,NPTN,MT-ND4,ATP13A2,IRF1,C5AR1,DOK2,YWHAE,ILK,ATP5K,MT-ND4L,GPI1,ZFP36L1,UBE2B,TAOK3,PRDX2,RHOA,PRDX1,TNFRSF1A,MT-ND5,LRP6,ITGB2,MT-ND2,TGFBR1,PSAP,ZFP36L2,COX7C,MT-CO3,MT-CYTB,HMGB1,CCL6,IFNAR1,MT-CO1,CYCS,JUN,NME2,WNK1,ERP29,TOP1,PTPRC,PRKCD,EIF2AK2,CIITA,CSNK1A1,GNAS,SH3GLB1,GNAI2,SYK,MT-CO2,ATP6V0C
GO:0071706	tumor necrosis factor superfamily cytokine production	0.0232523	0.0232523	1	ZFP36,H2-T23,CLEC4A2,TSPO,CD14,TNFRSF1A,IFNGR1,HMGB1,VSIR,PTPRC,SYK,FCER1G
GO:0043043	peptide biosynthetic process	0.0238439	0.0238439	1	IGFBP5,ZFP36,VIM,DDX39B,ZFP36L1,RHOA,EEF1B2,ZFP36L2,RPL38,RPL37,RPL6,TPR,SRP9,EIF2AK2,RPSA,RPL15,RPL23A,PPP1CA,MRPS21,RPL18,EIF4A1,MRPL30,CALR,RPS26,RPS5
GO:0007229	integrin-mediated signaling pathway	0.0308835	0.0308835	1	ILK,FYB,FERMT3,RHOA,ITGB2,NME2,ZYX,SYK,FCER1G
GO:0002460	adaptive immune response based on somatic recombination of immune receptors built from immunoglobulin superfamily domains	0.0316403	0.0316403	1	CD81,CD74,H2-T23,C3AR1,IRF1,H2-D1,TCIRG1,C1QC,C1QB,H2-K1,HMGB1,VSIR,POU2F2,PTPRC,SEMA4A,PRKCD,INPP5D,FCER1G
GO:0097305	response to alcohol	0.0316945	0.0316945	1	FOS,KLF2,MT-ND4,ABCA1,CD14,RHOA,LRP6,TGFBR1,EEF1B2,MT-CYTB,ATP2B1,GSN,ALDH2,GNAS,CALM3
GO:0046633	alpha-beta T cell proliferation	0.0317093	0.0317093	1	CD81,H2-T23,IRF1,VSIR,PTPRC,SYK
GO:0002504	antigen processing and presentation of peptide or polysaccharide antigen via MHC class II	0.0325138	0.0325138	1	CD74,H2-DMB1,CTSS,H2-DMA,FCER1G
GO:0023014	signal transduction by protein phosphorylation	0.0330669	0.0330669	1	CCL12,TRF,ZFP36,CCL9,CD81,CD74,C5AR1,DOK2,YWHAE,ILK,ZFP36L1,TAOK3,PRDX2,PRDX1,TGFBR1,PSAP,ZFP36L2,HMGB1,CCL6,JUN,WNK1,ERP29,PTPRC,PRKCD,EIF2AK2,GNAI2,SYK,ATP6V0C
GO:0043066	negative regulation of apoptotic process	0.0337836	0.0337836	1	IFIT3,IER3,CCL12,TSC22D3,CD74,BCL2A1B,C5AR1,ILK,GPI1,UBE2B,PRDX2,RHOA,TNFRSF1A,LRP6,TGFBR1,VDAC2,GRINA,MT1,JUN,NME2,YWHAH,PRELID1,PEA15A,LGMN,ARL6IP1,PRKCD,EIF2AK2,SON,GPX1,ALDH2,GNAI2,FCER1G
GO:0048585	negative regulation of response to stimulus	0.0366056	0.0366056	1	IGFBP5,EGR1,CCL12,PARP14,METRNL,ZFP36,CD74,CD9,NRROS,H2-T23,RAB7,TAP1,IRF1,DOK2,DDX39B,RASA4,ADIPOR1,UBE2B,ANXA5,TAOK3,PRDX2,RHOA,TNFRSF1A,DNM2,TGFBR1,PSAP,VDAC2,VSIR,GRINA,PRELID1,PEA15A,LGMN,PCBP2,PTPRC,SEMA4A,PRKCD,GPX1,CSNK1A1,NFKBIA,PTPRE,INPP5D,GNAI2,CALM3,TNFAIP8L2,CALR
GO:0002685	regulation of leukocyte migration	0.0372236	0.0372236	1	CCL12,CD81,CD74,CD9,C3AR1,C5AR1,MPP1,RHOA,P2RX4,HMGB1,WNK1,LGMN,CALR
GO:0006123	mitochondrial electron transport, cytochrome c to oxygen	0.038027	0.038027	1	COX7C,MT-CO3,MT-CO1,CYCS
GO:0019646	aerobic electron transport chain	0.038027	0.038027	1	COX7C,MT-CO3,MT-CO1,CYCS
GO:0045639	positive regulation of myeloid cell differentiation	0.0391313	0.0391313	1	FOS,ID2,CD74,RUNX1,ZFP36L1,HMGB1,JUN,GNAS,INPP5D
GO:0006811	ion transport	0.0410621	0.0410621	1	CCL12,MT-ATP8,TRF,SLC6A6,PLTP,MT-ND4,ATP13A2,FXYD2,SLC3A2,YWHAE,TSPO,ATP5K,ABCA1,TCIRG1,ANXA5,RHOA,MT-ND5,DNM2,P2RX4,PSAP,IFNGR1,VDAC2,COX7C,MT-CO3,MT-CYTB,MT-CO1,1810037I17RIK,CTSS,WNK1,WDR1,YWHAH,ATP2B1,PRELID1,TMEM37,ARL6IP1,PTPRC,PRKCD,GNAS,GNAI2,ATP6V0B,CALM3,CLIC1,SYK,MT-CO2,FCER1G,ATP6V0C
GO:0030307	positive regulation of cell growth	0.04227	0.04227	1	PICALM,CD81,RAB11A,ILK,DDX39B,RHOA,TGFBR1,CXCL16,TWF2,MACF1,H3F3A,SH3GLB1
GO:0042775	mitochondrial ATP synthesis coupled electron transport	0.0429362	0.0429362	1	MT-ND4,MT-ND2,COX7C,MT-CO3,MT-CYTB,MT-CO1,CYCS
GO:0015031	protein transport	0.0483763	0.0483763	1	PICALM,AP2A2,CD81,CD74,RHOB,H2-T23,RAB7,ATP13A2,TAP1,RTP4,RAB11A,YWHAE,GDI2,DDX39B,ABCA1,TCIRG1,SPCS1,GPI1,ANXA5,CD14,TNFRSF1A,DNM2,PSAP,IFNGR1,FIS1,HMGB1,POU2F2,M6PR,SEC62,ERP29,YWHAH,SRP14,TPR,ARL6IP1,IL10RA,MACF1,PRKCD,SRP9,YWHAG,SH3GLB1,NFKBIA,SEC61B,RAB14,BTF3,SYK,CALR,TOMM22
GO:0050789	regulation of biological process	0.0484879	0.0484879	1	IGFBP5,EGR1,MGP,IFIT3,IIGP1,IER3,FOS,CCL12,PARP14,XAF1,TRF,DEGS1,SLC6A6,PRPF40A,METRNL,KLF2,TSC22D3,ID2,PLTP,ZFP36,PICALM,APLP2,CCL9,NISCH,AP2A2,CD81,CD74,BLNK,RHOB,NPTN,CD9,NRROS,H2-T23,IFI213,RAB7,LAMP1,ATP13A2,IL2RG,BCL2A1B,CAPG,TAP1,BRD2,C3AR1,FXYD2,VIM,IRF1,UNC93B1,SP110,DOK3,SSU72,IER2,C5AR1,RUNX1,RNF13,H2-D1,CLEC4A2,RAB11A,DOK2,YWHAE,ITM2B,IRF2BP2,HEXB,STARD8,CD79B,ILK,FAM46A,GDI2,DDX39B,M…
GO:0034101	erythrocyte homeostasis	0.0498364	0.0498364	1	KLF2,ID2,ZFP36,MAFB,GPI1,ZFP36L1,PRDX1,TCEA1,KMT2E,INPP5D
