# Supplementary material for: The meningeal transcriptional response to traumatic brain injury and aging
Source: eLife. 2023 Jan 3;12:e81154. doi: 10.7554/eLife.81154 (PMC9810333; doi:10.7554/eLife.81154)
Supplement: Figure 2—source data 3. [file elife-81154-fig2-data3.xlsx]

## Sheet: Sheet1
	baseMean	log2FoldChange	lfcSE	stat	pvalue	padj	response
Srsf11	0.958276	-0.00202255	0.1425	74.3233	6.63164e-18	5.78279e-16	down
Eif2s2	0.726714	-0.00301654	0.13701	22.2128	2.44042e-06	1.95832e-05	down
Rpl11	8.8101	-0.0035728	0.0512547	6.31015	0.0120049	0.0263022	down
Eif3f	2.17904	-0.0038283	0.0787989	10.8843	0.000969847	0.00337383	down
B2m	7.91371	-0.00622012	0.0527968	16.922	3.89483e-05	0.000225418	down
Man2b1	2.60879	-0.00670338	0.0875145	12.8307	0.000340977	0.00136845	down
Luc7l2	1.20694	-0.00806614	0.166521	79.8687	4.00127e-19	4.36139e-17	down
Eloc	0.461844	-0.0085764	0.131246	6.25876	0.012358	0.026851	down
Cbl	0.842834	-0.00957819	0.14826	54.7831	1.34596e-13	4.4013e-12	down
Clec10a	1.3644	-0.00984698	0.174487	5.04985	0.024628	0.0470957	down
Ahnak	1.57348	-0.00995196	0.143794	12.8302	0.000341066	0.00136845	down
Selplg	0.880229	-0.0100963	0.115749	13.5589	0.000231192	0.00100465	down
Arpc5	1.58435	-0.0116455	0.0756977	6.96066	0.00833213	0.0196812	down
Blvrb	2.46205	-0.0118451	0.11017	5.54647	0.018518	0.0368669	down
Srsf5	0.991008	-0.01206	0.143961	68.1357	1.52623e-16	8.67961e-15	down
Glud1	0.997717	-0.0122742	0.10709	12.0717	0.000511924	0.00194086	down
Rps10	10.5513	-0.0128787	0.0525627	5.92404	0.0149357	0.0312075	down
Rnf213	0.579863	-0.0132913	0.184006	6.06011	0.0138269	0.0293267	down
Rnh1	0.532748	-0.0134274	0.124719	9.94584	0.00161213	0.00510075	down
Neat1	1.18275	-0.0135471	0.202304	43.617	3.99357e-11	7.47423e-10	down
Nckap1l	0.827219	-0.0140191	0.123958	16.6516	4.49124e-05	0.000254608	down
Cd84	0.638129	-0.0147234	0.146598	13.408	0.00025056	0.00107453	down
Pilra	0.206594	-0.0147879	0.228191	6.47935	0.0109135	0.0241775	down
Tsc22d4	1.24251	-0.0149199	0.110969	49.3366	2.15598e-12	5.12731e-11	down
Ncl	1.10116	-0.0157603	0.107081	11.9206	0.000555177	0.00209272	down
Arpc2	3.63736	-0.0170088	0.0588272	22.0126	2.7086e-06	2.14718e-05	down
Ckb	2.1512	-0.0175622	0.0906274	6.51539	0.0106945	0.0239938	down
Rps3	7.25726	-0.0179256	0.0519892	7.79458	0.00524032	0.0137087	down
Arpc1b	4.50713	-0.0181811	0.0534855	12.1443	0.000492369	0.0018831	down
Srgn	1.20438	-0.0188145	0.113546	15.5192	8.16693e-05	0.000420565	down
Maf	3.16589	-0.0189303	0.117128	5.59676	0.0179937	0.0358777	down
Eif3a	1.02515	-0.0208475	0.110684	23.1982	1.4613e-06	1.24116e-05	down
Fbl	0.439298	-0.0223082	0.140717	8.52082	0.00351106	0.00981298	down
Atp1b3	0.618729	-0.0232077	0.128381	6.2969	0.0120949	0.026367	down
Scimp	0.245656	-0.0233186	0.211765	9.56265	0.00198576	0.00614036	down
Tpm3	2.40577	-0.0233744	0.0676261	7.50973	0.00613666	0.0154658	down
Prcp	0.869395	-0.0249374	0.119451	15.974	6.422e-05	0.000348547	down
Tagln2	1.02103	-0.0250194	0.122607	7.06716	0.00785098	0.0189118	down
Mtdh	1.09812	-0.0257154	0.106713	14.892	0.000113844	0.000559804	down
Mrpl33	0.580772	-0.0261169	0.124244	15.8584	6.82614e-05	0.000364432	down
Capns1	0.848244	-0.0268753	0.0970117	6.90848	0.00857877	0.0200974	down
Dab2	4.1037	-0.0268852	0.111871	7.37314	0.00662052	0.0163492	down
Rbm39	2.25326	-0.027377	0.0857498	39.6856	2.98314e-10	5.06747e-09	down
Psmd8	0.441698	-0.0284866	0.138833	6.33871	0.011813	0.0260347	down
Scp2	1.08395	-0.0287876	0.0953448	5.02288	0.0250145	0.0477649	down
Rpl5	2.52266	-0.0295157	0.0730581	23.7984	1.0697e-06	9.34653e-06	down
Irf5	0.782697	-0.0308055	0.109447	13.159	0.000286139	0.00120175	down
Cyba	5.37108	-0.0314664	0.0535351	22.2976	2.33502e-06	1.88531e-05	down
Plxnb2	0.604246	-0.0322449	0.145754	7.37201	0.00662467	0.0163492	down
Ptbp3	1.03021	-0.0341471	0.136063	67.3378	2.28751e-16	1.19682e-14	down
Tmem173	0.4105	-0.0347816	0.148178	7.68503	0.00556808	0.0143934	down
Rhog	1.80065	-0.0352519	0.0743657	22.4946	2.10733e-06	1.72274e-05	down
Rpl14	4.15761	-0.0353652	0.0630893	7.95085	0.00480648	0.0128247	down
Hnrnpm	0.665802	-0.0382958	0.132771	27.2464	1.79104e-07	2.00229e-06	down
Clec2d	1.06037	-0.0383615	0.131821	10.3311	0.00130805	0.00430964	down
H3f3b	4.97522	-0.0395943	0.0585242	6.70156	0.00963286	0.0219127	down
Rpl29	6.18654	-0.0396189	0.0571577	8.89072	0.00286623	0.00836838	down
Tmem55b	0.772048	-0.0400629	0.134087	23.542	1.22219e-06	1.04485e-05	down
Cops9	1.15459	-0.0401659	0.0949445	11.6735	0.000633966	0.00235576	down
Dnajc3	0.663196	-0.040227	0.124069	5.8329	0.0157292	0.0320666	down
Dock8	0.996746	-0.0417512	0.139894	45.8411	1.28243e-11	2.62096e-10	down
Trim30a	0.501664	-0.043001	0.177322	5.09228	0.0240326	0.0461595	down
Samhd1	1.36155	-0.0432118	0.116074	33.4007	7.49985e-09	1.01132e-07	down
Apobec3	0.894073	-0.0435934	0.146044	20.5566	5.7895e-06	4.20704e-05	down
Rps16	11.3564	-0.0438843	0.0556938	5.48039	0.019231	0.0381123	down
Tgfbr2	1.08602	-0.044359	0.123991	8.82896	0.00296488	0.00853226	down
Tram1	0.458157	-0.0444603	0.141647	4.95403	0.0260299	0.0493437	down
Srrm2	2.1353	-0.0468443	0.101125	87.9695	6.64709e-21	1.0868e-18	down
Mcub	0.347535	-0.0473123	0.160757	22.7194	1.8747e-06	1.54221e-05	down
Ptma	5.00372	-0.0478514	0.0610523	6.72879	0.0094869	0.0216938	down
Eif5b	0.772647	-0.0482468	0.133489	24.3983	7.83361e-07	7.11553e-06	down
Bin1	0.980749	-0.0490522	0.127914	10.6228	0.001117	0.00378508	down
Nars	0.685116	-0.0490703	0.125134	13.7547	0.000208304	0.00092674	down
Rpl19	10.24	-0.0491123	0.0518194	5.39746	0.0201661	0.0396919	down
Rrbp1	2.38561	-0.0492641	0.0921052	29.2709	6.29329e-08	7.83964e-07	down
Rassf4	1.36775	-0.0509966	0.10729	7.47723	0.00624841	0.0155972	down
Rac2	1.18922	-0.0511971	0.0966702	9.54613	0.00200372	0.00618128	down
Camk1	1.23577	-0.0521919	0.100581	6.39594	0.0114382	0.0252722	down
Rplp0	8.04859	-0.0525102	0.0651019	12.0868	0.000507804	0.00193084	down
Rpl18a	9.97988	-0.0526839	0.0593852	6.56938	0.0103748	0.0233166	down
Cdc42	3.80119	-0.0527463	0.0513461	7.40514	0.00650377	0.0161116	down
Ucp2	4.43174	-0.0527546	0.063107	5.14628	0.0232962	0.0450094	down
Rbpj	0.730798	-0.0536703	0.143529	19.8908	8.19944e-06	5.67453e-05	down
Psmb6	0.577851	-0.0570867	0.11415	12.9053	0.000327655	0.00133512	down
Rps13	8.4509	-0.0595285	0.0584436	10.659	0.00109537	0.00375063	down
Atpif1	2.57941	-0.0598539	0.0766414	11.3819	0.000741616	0.00269454	down
Hnrnpa2b1	3.06866	-0.0602148	0.0668386	31.5628	1.93092e-08	2.47612e-07	down
Lcp1	4.13621	-0.0606376	0.067148	5.78761	0.0161395	0.0326787	down
Nedd8	1.25948	-0.0607217	0.0879417	6.21342	0.0126785	0.0273656	down
Ppia	10.7311	-0.0614711	0.0443226	7.25561	0.007068	0.0173126	down
Chd4	0.842206	-0.0633333	0.122338	12.46	0.000415756	0.00163798	down
Gpx4	1.90562	-0.0638747	0.0801717	13.0175	0.000308589	0.00126929	down
Gng5	4.21136	-0.0647481	0.0591099	21.8251	2.98664e-06	2.33924e-05	down
Cyb5a	1.16377	-0.0659611	0.113425	25.7145	3.95832e-07	3.97615e-06	down
Ube2d3	1.55246	-0.0662656	0.0935249	70.085	5.68041e-17	4.12776e-15	down
Rpl27	3.16604	-0.0663689	0.0639194	13.4356	0.00024689	0.00106931	down
Snx3	2.27152	-0.0665188	0.077567	6.68274	0.00973509	0.0221068	down
Dynll1	1.08242	-0.067035	0.10802	25.9326	3.53547e-07	3.61281e-06	down
Cyth4	2.37531	-0.0673382	0.0964274	83.1359	7.66002e-20	1.00193e-17	down
Romo1	0.784249	-0.0676877	0.115568	7.61568	0.00578628	0.0147093	down
Ssr4	1.11424	-0.0677536	0.0943786	11.0484	0.00088762	0.0031294	down
Eef1g	0.896516	-0.0679967	0.0958033	14.5865	0.000133868	0.000643747	down
Sf3b1	1.12133	-0.0691646	0.12168	54.648	1.4417e-13	4.59937e-12	down
Srsf7	0.842657	-0.0696769	0.139597	44.3317	2.7719e-11	5.40346e-10	down
Rpl3	4.98647	-0.0700908	0.0644916	13.2523	0.000272239	0.00115613	down
Fnbp1	0.933499	-0.071697	0.150589	58.5593	1.97252e-14	7.3716e-13	down
Arhgap45	1.69327	-0.072009	0.11753	61.9578	3.50898e-15	1.52992e-13	down
Eps15	1.10824	-0.0720394	0.136542	20.9504	4.71325e-06	3.52282e-05	down
Mef2c	2.106	-0.0722401	0.112533	55.6285	8.7544e-14	2.93609e-12	down
Ifi209	0.296399	-0.0731128	0.27233	9.5868	0.00195981	0.0060889	down
Rpl10a	5.3121	-0.0738638	0.0668136	11.3571	0.000751615	0.0027083	down
Coro1a	2.37225	-0.0741454	0.0973184	15.0819	0.000102945	0.000510045	down
Ddx5	2.33108	-0.0741604	0.0903187	52.6163	4.05511e-13	1.15306e-11	down
Glul	2.00668	-0.0748528	0.10484	5.34264	0.02081	0.0406868	down
Psmb8	1.82751	-0.0748759	0.081303	14.5129	0.000139207	0.000664203	down
Ubl5	1.54371	-0.0765118	0.0852478	5.83229	0.0157346	0.0320666	down
Dock10	0.938085	-0.076773	0.180183	68.2732	1.42343e-16	8.46291e-15	down
Abhd12	1.44297	-0.0783036	0.104838	9.18873	0.00243509	0.00727192	down
Pfdn5	2.89942	-0.0793961	0.0691333	10.4805	0.00120642	0.00403579	down
Rap1b	1.14084	-0.080426	0.0908729	10.6417	0.00110564	0.00376608	down
Tcf25	1.19884	-0.0826612	0.118496	72.3569	1.79591e-17	1.46815e-15	down
Tmem234	0.834678	-0.0828858	0.118385	21.0694	4.42936e-06	3.36838e-05	down
Itgb1	0.973327	-0.0835153	0.11762	15.6999	7.42286e-05	0.000391496	down
Klf3	0.679146	-0.084004	0.150397	35.3062	2.81737e-09	4.07572e-08	down
H13	0.607458	-0.0843902	0.134617	15.9058	6.65761e-05	0.00035836	down
Cfl1	5.16011	-0.0845464	0.0519958	21.0271	4.52843e-06	3.41241e-05	down
Fes	0.82815	-0.0850436	0.113958	12.8843	0.000331358	0.00134185	down
Ubxn1	0.92523	-0.0855953	0.102197	10.2767	0.00134719	0.00438339	down
Rpl23	12.8021	-0.0860319	0.0534898	5.99703	0.01433	0.0301829	down
Ndufa6	1.08704	-0.0863602	0.0909211	7.69356	0.00554181	0.0143823	down
Rpl39	10.3068	-0.0868436	0.0576421	5.20956	0.0224631	0.0435284	down
Eif3e	0.522138	-0.0886279	0.130168	18.5101	1.69008e-05	0.000105771	down
Tax1bp1	0.672254	-0.0897121	0.134646	6.61606	0.0101063	0.0228309	down
Hnrnpl	0.677099	-0.0911109	0.123739	9.35335	0.00222578	0.00672362	down
Hspa8	7.90016	-0.0919867	0.0606952	12.3976	0.000429877	0.00167844	down
Atp5j	1.72489	-0.0953114	0.0845469	22.4753	2.12868e-06	1.72939e-05	down
Rpl7	4.97679	-0.0971382	0.0590008	7.43914	0.00638205	0.0158401	down
Eif5a	1.57995	-0.0973419	0.0800875	7.19066	0.00732839	0.0177839	down
Srsf2	0.84411	-0.0974656	0.138134	41.1107	1.43844e-10	2.57737e-09	down
Ms4a4c	0.372895	-0.0987559	0.233588	9.53333	0.00201774	0.00620989	down
Actb	36.4824	-0.0998504	0.0422401	17.5023	2.86967e-05	0.00017218	down
Bcap31	0.571148	-0.0998896	0.117287	6.80189	0.00910616	0.0211186	down
Rpl36	8.37346	-0.101959	0.054699	6.50708	0.0107446	0.0240238	down
Rack1	3.81282	-0.103437	0.0675191	22.1611	2.50703e-06	1.99951e-05	down
Pid1	1.94939	-0.105741	0.119502	45.9172	1.2336e-11	2.56118e-10	down
Colgalt1	0.520971	-0.106063	0.142354	7.3527	0.00669621	0.0164636	down
Sem1	2.75572	-0.107508	0.0623489	5.40266	0.0201061	0.0396919	down
Tcf4	0.984049	-0.107993	0.178108	61.1414	5.3118e-15	2.24124e-13	down
Atp5a1	1.21447	-0.108101	0.0830315	9.82268	0.00172373	0.00538099	down
Cltc	3.34703	-0.108129	0.0987973	6.13174	0.0132776	0.0284241	down
Pycard	0.650039	-0.108449	0.120038	13.1556	0.000286657	0.00120175	down
Ccr5	0.600416	-0.108533	0.18327	11.3013	0.000774529	0.0027832	down
S100a11	0.593451	-0.109259	0.154726	7.8341	0.00512696	0.0134934	down
Fth1	44.9372	-0.110173	0.0492961	5.01043	0.0251951	0.0480396	down
Mrfap1	1.29502	-0.110556	0.0932045	11.2497	0.000796367	0.00284971	down
Ctsz	2.74008	-0.110832	0.0762755	19.9244	8.05658e-06	5.63426e-05	down
Atp5f1	1.13153	-0.112422	0.0833747	13.112	0.000293412	0.00122614	down
Efhd2	1.16262	-0.113435	0.0930117	18.0069	2.20111e-05	0.00013329	down
Tbcb	0.399512	-0.118262	0.14012	9.84933	0.00169894	0.00532904	down
Tln1	1.84173	-0.118895	0.0893701	20.5304	5.86924e-06	4.24142e-05	down
Myo1f	0.687837	-0.118938	0.123577	8.09168	0.0044469	0.0120032	down
Hmgn1	0.809991	-0.118987	0.118126	9.35618	0.00222235	0.00672362	down
Plbd1	1.40748	-0.119032	0.135331	8.95726	0.00276369	0.00814167	down
Acin1	0.711941	-0.119268	0.142891	23.6958	1.12829e-06	9.77353e-06	down
Dock2	0.754033	-0.119322	0.15312	50.2057	1.38447e-12	3.41677e-11	down
Pip4k2a	0.67771	-0.119438	0.143724	16.6479	4.49992e-05	0.000254608	down
Ap1b1	0.719555	-0.119501	0.158018	15.533	8.10782e-05	0.000420565	down
Uqcr11	1.30103	-0.119916	0.0910213	6.29821	0.012086	0.026367	down
Mef2a	1.15101	-0.121488	0.150146	54.1038	1.90178e-13	5.92267e-12	down
Rpl34	9.84586	-0.121884	0.053943	8.21745	0.00414894	0.0113701	down
Fuca1	0.821683	-0.122039	0.114493	13.024	0.000307532	0.00126893	down
Camk1d	0.544521	-0.122751	0.15213	6.19857	0.0127854	0.0275054	down
Gapdh	2.0586	-0.122989	0.0811382	5.88686	0.0152543	0.031471	down
Sdha	0.557861	-0.123097	0.133641	10.6885	0.00107801	0.00370087	down
Clec4b1	0.582738	-0.12423	0.166869	10.0506	0.00152298	0.00488251	down
Nrp1	1.07002	-0.124297	0.138843	24.6379	6.91777e-07	6.41734e-06	down
Bcl2a1d	0.099689	-0.124643	0.388252	7.94796	0.00481415	0.0128247	down
Rps27	7.9741	-0.125026	0.0606974	7.61405	0.00579152	0.0147093	down
Tspan3	0.513097	-0.126161	0.166087	5.82911	0.0157631	0.0320666	down
Rps11	12.0591	-0.127009	0.0542682	7.83313	0.00512973	0.0134934	down
Tubb2a	0.972104	-0.127229	0.114424	5.19178	0.022694	0.0439108	down
Slc25a5	1.50769	-0.127508	0.0833574	8.21475	0.00415512	0.0113701	down
Sirpb1a	0.187445	-0.127921	0.303207	8.17107	0.00425637	0.0115505	down
Rpl10	10.6524	-0.127938	0.0539412	15.8203	6.96519e-05	0.000370344	down
Vamp8	1.92499	-0.128606	0.0718622	7.00299	0.00813736	0.019317	down
Fcgr3	3.13583	-0.130755	0.0715869	20.0864	7.40228e-06	5.20547e-05	down
Stx7	0.726917	-0.132808	0.115906	6.88301	0.00870188	0.0202889	down
Plek	0.547585	-0.13353	0.167906	13.7879	0.000204652	0.000913602	down
Idh3b	0.557939	-0.13362	0.129445	7.11486	0.00764474	0.0184489	down
Tkt	0.793114	-0.135236	0.112941	15.6917	7.45511e-05	0.000391618	down
Rps15a	8.9029	-0.135982	0.0577184	11.3654	0.000748269	0.00270369	down
Psme2	1.22352	-0.136126	0.0972887	6.27135	0.0122705	0.0267053	down
Hsbp1	1.01063	-0.136729	0.106321	8.05369	0.0045411	0.0121966	down
Gns	1.03518	-0.1383	0.123881	25.3497	4.78223e-07	4.63345e-06	down
Myo5a	1.19817	-0.139971	0.140995	48.3763	3.518e-12	7.79922e-11	down
Fgd2	0.823669	-0.141714	0.140604	33.5716	6.86866e-09	9.45707e-08	down
Mat2a	0.637702	-0.142932	0.143873	13.4149	0.00024963	0.00107406	down
Slco2b1	0.713659	-0.143064	0.155147	9.12477	0.00252172	0.00749639	down
Sdf2l1	0.750307	-0.143512	0.130068	14.8082	0.000119017	0.000580876	down
Dse	0.792836	-0.143955	0.142306	19.6563	9.26965e-06	6.24984e-05	down
Abca9	1.05981	-0.145078	0.141903	11.1669	0.000832677	0.0029516	down
Psma4	0.476697	-0.148211	0.128482	14.1583	0.000168052	0.000776201	down
Rpl12	2.96832	-0.148833	0.0739892	8.72254	0.00314299	0.00891764	down
Hsp90ab1	6.55967	-0.150279	0.0586081	7.63202	0.0057341	0.0146203	down
Mycbp2	1.14399	-0.150938	0.159329	69.3964	8.0534e-17	5.26693e-15	down
Ndufa4	1.69223	-0.151291	0.0766779	5.61438	0.0178137	0.0355729	down
Sub1	0.969337	-0.151354	0.094601	7.01521	0.00808202	0.019309	down
Zfhx3	0.898394	-0.151803	0.145178	48.0191	4.22084e-12	9.05058e-11	down
Ndufb4	0.900643	-0.151943	0.101122	5.82124	0.0158338	0.0321593	down
Fcgr4	0.318465	-0.152003	0.209665	5.07294	0.0243021	0.0466087	down
Gng10	0.354951	-0.152522	0.166119	8.86561	0.00290593	0.00844657	down
Pfn1	8.86759	-0.153037	0.0495486	36.5841	1.46218e-09	2.25004e-08	down
Ybx1	2.90243	-0.153356	0.062887	8.31473	0.00393249	0.0108061	down
Osbpl9	0.643739	-0.153427	0.161779	37.5075	9.10641e-10	1.47052e-08	down
H2afy	0.608398	-0.153437	0.170463	53.5615	2.50625e-13	7.4504e-12	down
Tbxas1	0.592403	-0.154291	0.157409	20.3622	6.4083e-06	4.58036e-05	down
Txn1	0.622006	-0.157306	0.121515	10.3955	0.00126321	0.00417244	down
Ier5	0.423912	-0.158497	0.158122	6.771	0.00926508	0.0213734	down
Itsn1	0.679428	-0.159091	0.180215	18.7471	1.4925e-05	9.52289e-05	down
Rpl4	1.98693	-0.159978	0.0803218	12.4241	0.000423829	0.00166477	down
Nipbl	0.732883	-0.160794	0.165193	50.3606	1.2794e-12	3.28129e-11	down
Irf8	1.2306	-0.161506	0.132341	27.909	1.27156e-07	1.47186e-06	down
Msn	1.25757	-0.16159	0.0923477	9.95101	0.00160761	0.00510075	down
Psmb5	0.572147	-0.161623	0.114813	11.1929	0.000821111	0.00291851	down
Stub1	0.668446	-0.161728	0.139394	28.4109	9.81125e-08	1.18825e-06	down
Npm1	1.69783	-0.164154	0.0825212	6.16179	0.0130539	0.0279909	down
Actr2	0.982825	-0.16492	0.109467	19.0953	1.24349e-05	8.25624e-05	down
Skap2	0.847133	-0.16539	0.125249	50.5055	1.18829e-12	3.10858e-11	down
Rpl32	10.812	-0.165481	0.0562999	16.0429	6.19235e-05	0.000337483	down
Sirpa	1.4282	-0.166092	0.0969785	16.3995	5.13e-05	0.000284324	down
Atp5l	2.06516	-0.166355	0.0701876	6.08549	0.0136297	0.0290352	down
mt-Atp6	23.1069	-0.167324	0.101326	13.199	0.000280103	0.00118185	down
Arhgap30	0.862432	-0.169381	0.14012	48.3404	3.58293e-12	7.81078e-11	down
Atp5d	1.54955	-0.169737	0.0785424	5.05874	0.024502	0.0469233	down
Psmb10	0.597541	-0.170389	0.124859	13.6869	0.000215956	0.000947889	down
Snrpe	0.732412	-0.171395	0.104223	13.5973	0.00022651	0.000990887	down
Rps25	2.82878	-0.171467	0.0684252	7.49191	0.00619767	0.0155385	down
Ctsh	3.14821	-0.173869	0.066753	20.6277	5.5784e-06	4.12234e-05	down
Lyn	1.40601	-0.174494	0.0944957	13.8175	0.000201451	0.00090549	down
Rpl17	6.61233	-0.1748	0.0629056	20.6004	5.65852e-06	4.13483e-05	down
Atp5b	1.23711	-0.177409	0.0840679	29.0425	7.08071e-08	8.65568e-07	down
Eif3i	0.62871	-0.1798	0.114049	15.4149	8.63069e-05	0.000442704	down
Cox6b1	1.81383	-0.179851	0.0703261	6.508	0.0107391	0.0240238	down
Irf2	0.701791	-0.180405	0.125277	6.71148	0.00957944	0.0218291	down
Eno1	1.06563	-0.182252	0.098696	7.93811	0.00484043	0.0128685	down
Arhgdib	2.36419	-0.183387	0.0683998	24.16	8.86566e-07	7.88863e-06	down
Laptm5	5.61364	-0.183775	0.0585662	10.3207	0.00131546	0.00432317	down
Csde1	0.726654	-0.184129	0.143566	36.3234	1.67144e-09	2.51292e-08	down
Ptgs1	0.491645	-0.184273	0.1877	11.4855	0.000701401	0.00256984	down
Fus	1.26305	-0.187361	0.140401	92.1561	8.01008e-22	1.49674e-19	down
Cnn2	0.522613	-0.189391	0.151739	5.74556	0.0165304	0.0332131	down
Cyfip1	1.30932	-0.191213	0.108779	15.888	6.72028e-05	0.000360251	down
Xrn2	0.425018	-0.192148	0.173431	9.94319	0.00161446	0.00510075	down
Grcc10	1.12685	-0.193411	0.0925127	5.39365	0.0202101	0.0396919	down
Rpl27a	9.48992	-0.194337	0.0546477	14.9894	0.000108116	0.000533644	down
Spi1	2.28278	-0.194349	0.0694383	12.6039	0.000384936	0.00153038	down
Rpl26	6.69515	-0.194582	0.0560503	18.3106	1.87661e-05	0.000116332	down
Itga4	0.552843	-0.195522	0.18707	33.7322	6.32447e-09	8.80044e-08	down
Rps29	16.4831	-0.197041	0.0573359	11.8059	0.000590422	0.00220021	down
Rpl36al	0.669404	-0.198801	0.112078	6.48376	0.0108865	0.0241775	down
Rps12	8.98824	-0.199592	0.0578016	16.2002	5.69871e-05	0.000311879	down
Rps19	5.96912	-0.200232	0.0661598	24.1655	8.84023e-07	7.88863e-06	down
Ap2s1	1.00301	-0.201503	0.105342	8.98406	0.00272344	0.00805942	down
Eif4g2	1.06017	-0.204051	0.104232	17.2135	3.34056e-05	0.000197713	down
Cyp4f18	0.40333	-0.204489	0.205281	8.84516	0.00293868	0.00850395	down
Acp2	0.538479	-0.211289	0.157261	17.98	2.23235e-05	0.000134558	down
Cenpx	0.734781	-0.21229	0.119019	16.2064	5.68033e-05	0.000311879	down
Snx6	1.28419	-0.21288	0.116456	6.02849	0.0140768	0.0296975	down
Ptpn6	1.09643	-0.213396	0.0937917	7.46959	0.00627499	0.0156135	down
Atp6v1g1	1.34409	-0.215167	0.0850738	10.1178	0.00146848	0.00473096	down
Hmgb2	0.339446	-0.216245	0.170435	12.6993	0.000365783	0.00145867	down
Txn2	0.815169	-0.216379	0.105698	7.46849	0.00627882	0.0156135	down
F11r	0.296774	-0.21884	0.231037	5.27303	0.0216583	0.0421564	down
Scarb2	0.651739	-0.221441	0.1409	20.6083	5.6352e-06	4.13483e-05	down
Hnrnpa3	1.99691	-0.221513	0.0783396	27.1107	1.92133e-07	2.12975e-06	down
Mbnl1	2.29651	-0.221982	0.131424	98.1652	3.84901e-23	1.25863e-20	down
Pdia6	1.21814	-0.222952	0.101253	12.1723	0.000485056	0.00186604	down
Atp6v1f	1.52609	-0.224088	0.0810788	13.5761	0.00022908	0.000998791	down
Caprin1	0.534059	-0.224199	0.151796	23.6154	1.1764e-06	1.01232e-05	down
Cox8a	4.24812	-0.224207	0.0585752	26.2126	3.05815e-07	3.14965e-06	down
Tmsb4x	58.8584	-0.224467	0.0483398	22.8875	1.71762e-06	1.44016e-05	down
Psmc3	0.596353	-0.22573	0.125494	6.31328	0.0119837	0.0262998	down
Prdx5	1.80446	-0.226207	0.0904658	6.63433	0.0100032	0.0226369	down
Atrx	0.941109	-0.226337	0.154196	69.5159	7.57996e-17	5.21821e-15	down
Pak2	0.907125	-0.231122	0.109717	19.6685	9.21055e-06	6.24218e-05	down
Sec14l1	0.534595	-0.232455	0.154975	5.27975	0.0215749	0.0420566	down
Psenen	1.02633	-0.23457	0.0917932	7.7447	0.00538705	0.0140364	down
Lair1	0.787591	-0.236237	0.146061	7.48092	0.00623561	0.015595	down
Slc9a9	0.841788	-0.236349	0.157492	16.2858	5.44704e-05	0.000300621	down
Rpl37a	10.4941	-0.236692	0.0569802	18.8746	1.39597e-05	9.11384e-05	down
Hspa4	0.58118	-0.238411	0.144155	13.0321	0.000306198	0.00126893	down
Cotl1	1.32775	-0.238721	0.0898649	29.7116	5.01347e-08	6.3054e-07	down
Brk1	0.963656	-0.238949	0.0933754	7.70663	0.00550185	0.014307	down
Manf	0.581012	-0.238994	0.135467	17.2382	3.29743e-05	0.000196047	down
Cfh	1.47664	-0.243076	0.155569	14.4647	0.000142811	0.000674356	down
Sf3b2	0.937732	-0.243248	0.0999142	14.2556	0.000159582	0.000742821	down
Bin2	0.282348	-0.244057	0.180951	6.91492	0.00854796	0.0200731	down
Syngr2	0.979444	-0.245076	0.105975	17.0643	3.6136e-05	0.000211009	down
Hnrnpu	1.37047	-0.247292	0.0929815	19.341	1.09335e-05	7.33389e-05	down
Hpgds	1.14016	-0.249752	0.161688	44.3056	2.80914e-11	5.40346e-10	down
Dusp6	0.419504	-0.250206	0.177879	5.49551	0.0190653	0.0378988	down
Tpt1	14.4591	-0.25504	0.0524423	26.6212	2.4751e-07	2.65363e-06	down
Igf1	1.64072	-0.257373	0.157052	7.00637	0.00812202	0.0193156	down
Zeb2os	0.54002	-0.25971	0.144336	6.49918	0.0107924	0.0240868	down
Ifnar2	1.39667	-0.259797	0.0946936	7.65649	0.00565686	0.0145082	down
Ostc	0.569153	-0.259889	0.120338	6.2066	0.0127275	0.0274259	down
Zeb2	3.18109	-0.260351	0.121325	97.6576	4.97367e-23	1.30111e-20	down
Npl	0.438709	-0.264843	0.240465	11.0313	0.000895843	0.0031499	down
Rps6	2.84343	-0.268675	0.0733165	26.6453	2.4445e-07	2.64248e-06	down
Pomp	1.58356	-0.268938	0.0735008	13.3819	0.000254063	0.00108246	down
Srsf3	0.693839	-0.271067	0.112154	5.77541	0.016252	0.0327543	down
Banf1	0.582504	-0.272898	0.123683	7.64948	0.00567887	0.0145361	down
Rps18	4.52915	-0.274989	0.0646901	25.8532	3.68396e-07	3.73537e-06	down
Akap13	0.728808	-0.275587	0.13983	18.7595	1.4828e-05	9.50734e-05	down
Flna	0.754814	-0.280216	0.157032	18.8684	1.40052e-05	9.11384e-05	down
Sesn1	0.560758	-0.282015	0.158798	11.2335	0.000803352	0.00286317	down
Rps9	10.7363	-0.285061	0.0572301	30.444	3.43648e-08	4.364e-07	down
Ramp1	0.428076	-0.28534	0.16284	6.49635	0.0108096	0.0240868	down
Cmtm3	0.576988	-0.285815	0.128642	4.99088	0.0254812	0.048444	down
Hspe1	1.05914	-0.286777	0.10339	11.2473	0.000797395	0.00284971	down
F13a1	4.44684	-0.292661	0.1448	5.76789	0.0163217	0.0328442	down
Mcl1	0.496457	-0.29334	0.148526	10.1618	0.00143383	0.00464219	down
Gngt2	0.522718	-0.298994	0.159826	13.4249	0.000248301	0.00107187	down
Rtn4	1.27939	-0.300746	0.0863115	15.7778	7.12327e-05	0.000377216	down
Ptges3	0.807349	-0.303137	0.118658	25.1734	5.24011e-07	4.96671e-06	down
Cd86	0.499036	-0.30373	0.16597	5.64172	0.017538	0.0350761	down
Ccdc50	0.909159	-0.308524	0.144153	53.2034	3.00737e-13	8.74141e-12	down
Rplp1	15.6862	-0.309377	0.0528073	34.1367	5.1373e-09	7.22536e-08	down
Cx3cr1	2.18525	-0.313867	0.110086	15.2696	9.32067e-05	0.000470712	down
Rnase6	0.216985	-0.314041	0.24353	4.97162	0.0257665	0.0489151	down
Cox7b	0.938277	-0.315497	0.0986887	13.0254	0.000307288	0.00126893	down
Rbm25	0.957934	-0.32353	0.157827	71.9393	2.21914e-17	1.70744e-15	down
Myh9	1.68103	-0.324503	0.102355	25.6411	4.11184e-07	4.04383e-06	down
Ncf4	0.484246	-0.326466	0.139841	5.39615	0.0201812	0.0396919	down
Fkbp2	0.63669	-0.327579	0.120762	7.59521	0.00585237	0.0148351	down
Dnaja1	1.0118	-0.328335	0.119724	8.03499	0.00458821	0.0122979	down
Was	0.58941	-0.328368	0.133073	17.0716	3.59964e-05	0.000211009	down
Ssh2	1.12446	-0.329967	0.151645	50.7525	1.0478e-12	2.797e-11	down
Rps14	6.76423	-0.332231	0.0565939	37.1001	1.12215e-09	1.76841e-08	down
Pik3ap1	0.509295	-0.336077	0.139807	5.77987	0.0162107	0.0327217	down
Gm26917	4.03461	-0.336883	0.25784	7.04961	0.00792824	0.0190628	down
Snrpf	0.687535	-0.338261	0.113606	8.77118	0.00306027	0.00873982	down
Dync1h1	0.615026	-0.340038	0.144884	19.9145	8.09817e-06	5.63426e-05	down
Snrpd2	0.561553	-0.341555	0.12111	7.86157	0.00504964	0.0133703	down
Hnrnpa1	0.606743	-0.351381	0.118946	18.7319	1.50448e-05	9.5527e-05	down
Rps23	6.41091	-0.353601	0.0591369	41.7129	1.05707e-10	1.92034e-09	down
Rac1	0.816729	-0.368904	0.0984603	14.0453	0.000178459	0.000813323	down
Cflar	0.605083	-0.378978	0.195283	36.9255	1.22733e-09	1.91112e-08	down
Ndufb7	0.812212	-0.380736	0.101313	13.8671	0.000196199	0.000887493	down
Slamf8	0.193621	-0.387095	0.247086	5.38528	0.0203073	0.0397634	down
Pafah1b1	0.645629	-0.405408	0.127487	26.5234	2.60364e-07	2.74642e-06	down
Lgals1	2.07603	-0.408693	0.109673	16.6412	4.51598e-05	0.000254608	down
Ube2l3	0.492997	-0.427302	0.127471	11.864	0.000572304	0.00214491	down
Ophn1	0.549453	-0.450059	0.17989	26.947	2.09109e-07	2.28164e-06	down
Ncoa4	0.646983	-0.464293	0.15657	14.2457	0.000160424	0.000744093	down
Snx20	0.625348	-0.477348	0.147293	40.6672	1.80493e-10	3.19034e-09	down
S100a4	0.141606	-0.525853	0.362285	10.415	0.00124995	0.00413907	down
Ptms	1.17978	-0.537823	0.101374	33.2455	8.12288e-09	1.08416e-07	down
Napsa	0.276441	-0.545665	0.307326	5.82905	0.0157636	0.0320666	down
Cdk2ap2	0.448632	-0.579953	0.161676	18.3794	1.81006e-05	0.000112741	down
Gm42418	144.14	-0.602942	0.0864383	50.3219	1.30483e-12	3.28215e-11	down
Trir	0.484901	-0.633578	0.125411	24.8639	6.15231e-07	5.74802e-06	down
Lars2	12.4937	-0.664709	0.120099	33.4837	7.18642e-09	9.7915e-08	down
Ccr1	0.267538	-0.684938	0.27981	6.29989	0.0120745	0.026367	down
Ccl8	3.97775	-0.724515	0.327399	5.09507	0.023994	0.0461532	down
Siglech	0.412802	-1.41452	0.339654	21.0224	4.53944e-06	3.41241e-05	down
Hbb-bs	3.50902	-3.0978	0.173022	315.653	1.28195e-70	1.67679e-67	down
Hba-a1	2.1624	-3.62806	0.2228	262.303	5.4023e-59	2.3554e-56	down
Hba-a2	1.7111	-3.90769	0.229232	290.661	3.56913e-65	2.33421e-62	down
Son	2.41952	0.0532421	0.105598	96.8892	7.33193e-23	1.59836e-20	up
mt-Atp8	1.77388	0.654197	0.171559	85.0832	2.86066e-20	4.15749e-18	up
Snrnp70	1.14029	0.140057	0.132445	79.9922	3.75883e-19	4.36139e-17	up
Celf2	1.27656	0.139833	0.140573	78.4918	8.033e-19	8.08244e-17	up
Wnk1	1.75678	0.109775	0.123255	75.7258	3.25923e-18	3.04505e-16	up
Macf1	1.0591	0.073544	0.190591	68.734	1.1268e-16	7.01837e-15	up
Igfbp5	0.702699	2.00805	0.288963	67.4349	2.17762e-16	1.1868e-14	up
mt-Nd3	1.81525	0.179843	0.159127	64.864	8.0249e-16	4.03714e-14	up
Syk	0.923321	0.0202605	0.143958	63.6002	1.5241e-15	7.30263e-14	up
AC149090.1	1.04234	0.00130271	0.186285	63.5503	1.56325e-15	7.30263e-14	up
Tm6sf1	1.08798	0.213495	0.144736	62.1042	3.25757e-15	1.46927e-13	up
mt-Nd4	5.78535	0.322307	0.117159	60.4807	7.43036e-15	3.03716e-13	up
Runx1	0.943013	0.274085	0.189073	59.9995	9.48806e-15	3.76072e-13	up
Nisch	1.01202	0.358577	0.154543	58.7481	1.79209e-14	6.89429e-13	up
mt-Nd5	3.30778	0.166447	0.139152	57.7313	3.00485e-14	1.09176e-12	up
Srgap2	0.915796	0.178405	0.170918	56.2893	6.25557e-14	2.21143e-12	up
Mgp	1.31611	1.40953	0.226055	55.881	7.69941e-14	2.65022e-12	up
Irf2bp2	0.748584	0.245511	0.17712	53.9133	2.09535e-13	6.37376e-12	up
Slc6a6	1.02584	0.48289	0.132299	52.2063	4.99659e-13	1.39054e-11	up
Inpp5d	1.06263	0.0293684	0.128368	51.1906	8.38209e-13	2.28412e-11	up
Ptprc	2.12627	0.0752007	0.121129	49.3778	2.11118e-12	5.11375e-11	up
Picalm	0.679724	0.3696	0.164352	49.1042	2.4272e-12	5.66925e-11	up
Tacc1	0.762658	0.0846604	0.15154	48.644	3.06911e-12	7.04279e-11	up
Prkcd	1.45571	0.0671996	0.111436	48.4273	3.42762e-12	7.72987e-11	up
Tcirg1	0.750528	0.211117	0.155162	46.831	7.73784e-12	1.63243e-10	up
Lrrc25	1.02922	0.115378	0.0994041	45.1897	1.78844e-11	3.59889e-10	up
CAAA01147332.1	0.565119	0.126616	0.135196	44.8185	2.16175e-11	4.28419e-10	up
Ifnar1	0.788909	0.126995	0.164499	43.6139	3.99997e-11	7.47423e-10	up
Ciita	0.782742	0.0487769	0.217662	43.2324	4.86098e-11	8.95516e-10	up
mt-Nd2	7.91494	0.150962	0.112794	40.6131	1.85556e-10	3.2361e-09	up
Prrc2c	0.908812	0.025309	0.130128	39.859	2.72967e-10	4.6979e-09	up
Fyb	3.11511	0.199487	0.100405	39.4472	3.37053e-10	5.65212e-09	up
Kmt2e	0.979286	0.0453088	0.12742	39.3662	3.51334e-10	5.81702e-09	up
Ubap2l	0.713339	0.076336	0.147112	37.619	8.60042e-10	1.40617e-08	up
Top1	0.891019	0.0859319	0.134569	37.1456	1.09632e-09	1.74876e-08	up
mt-Nd1	9.08012	0.325298	0.112414	36.55	1.48799e-09	2.26312e-08	up
Kctd12	1.41376	0.0326937	0.116327	36.0196	1.95347e-09	2.90357e-08	up
H2-D1	11.3119	0.266723	0.0566108	35.5627	2.46975e-09	3.6297e-08	up
Ifi203	1.10009	0.204022	0.167118	35.2936	2.83555e-09	4.07572e-08	up
Ewsr1	0.787152	0.0998878	0.127493	34.32	4.67541e-09	6.64721e-08	up
Sema4a	0.719688	0.0691056	0.164167	32.7681	1.03836e-08	1.37189e-07	up
Ptpre	0.883228	0.0373258	0.137717	32.2825	1.3331e-08	1.74369e-07	up
Mtss1	0.590445	0.264851	0.200748	32.0327	1.51603e-08	1.96333e-07	up
Fam46a	0.665399	0.239491	0.170028	29.0751	6.96279e-08	8.59182e-07	up
Prex1	0.69683	0.0596866	0.136931	28.3316	1.02215e-07	1.22658e-06	up
Dpm3	0.952496	0.224077	0.117903	28.1888	1.1004e-07	1.30111e-06	up
Clic1	3.11047	0.0204201	0.0586913	28.1822	1.10415e-07	1.30111e-06	up
H2-DMa	2.36554	0.115382	0.0989456	28.146	1.12499e-07	1.31383e-06	up
Tpr	1.38659	0.0976353	0.107227	27.6248	1.4728e-07	1.68985e-06	up
Ap2a2	0.759604	0.347412	0.152781	27.364	1.6854e-07	1.91696e-06	up
Myl12b	1.98319	0.00925271	0.070543	27.3394	1.70696e-07	1.92475e-06	up
mt-Nd4l	13.5403	0.212625	0.10434	26.945	2.09325e-07	2.28164e-06	up
Hmox2	0.924473	0.244836	0.0972677	26.5872	2.51903e-07	2.67878e-06	up
Wwp1	2.16309	0.0426109	0.142309	26.3444	2.85641e-07	2.98894e-06	up
Gdi2	2.90982	0.234299	0.0750619	26.3226	2.88883e-07	2.99888e-06	up
Csnk1a1	0.784842	0.0479489	0.124876	25.7029	3.98223e-07	3.97615e-06	up
Rab14	1.56584	0.0218901	0.0864377	25.6576	4.07684e-07	4.03978e-06	up
Unc93b1	5.25429	0.291472	0.0580381	25.6106	4.17743e-07	4.07768e-06	up
Atp2b1	1.65816	0.10487	0.108402	25.2952	4.91933e-07	4.73124e-06	up
Ldha	0.866657	0.204705	0.105871	25.182	5.2166e-07	4.96671e-06	up
Pou2f2	0.95581	0.128226	0.149523	25.0456	5.59893e-07	5.26863e-06	up
Brd2	0.710538	0.297683	0.13725	24.566	7.18067e-07	6.61431e-06	up
Rhoa	3.27	0.17167	0.0575496	24.4271	7.71752e-07	7.0591e-06	up
Rpl15	4.81962	0.0461331	0.0619057	24.3667	7.96344e-07	7.18357e-06	up
Shisa5	1.06929	0.0483245	0.0981253	23.8905	1.01974e-06	9.0123e-06	up
Mndal	0.938982	0.121893	0.157305	23.7946	1.07185e-06	9.34653e-06	up
Btf3	1.99514	0.0208195	0.0738885	22.8896	1.71576e-06	1.44016e-05	up
Ms4a6c	2.58128	0.0245818	0.0788107	22.8423	1.75856e-06	1.46509e-05	up
Atp6v0b	2.28941	0.0218605	0.0771123	22.7679	1.82797e-06	1.51328e-05	up
BC005537	0.721825	0.415164	0.151318	21.9212	2.84079e-06	2.23841e-05	up
Rpl23a	1.75638	0.0411621	0.0842929	21.5441	3.4579e-06	2.69222e-05	up
Dnm2	0.827254	0.160563	0.129651	21.4464	3.63863e-06	2.81617e-05	up
C3ar1	1.386	0.292957	0.114076	21.2545	4.02164e-06	3.0943e-05	up
Taok3	0.722584	0.184074	0.138446	21.1234	4.30637e-06	3.29399e-05	up
Cd81	4.54982	0.344459	0.0957308	20.6977	5.3782e-06	3.99698e-05	up
Tgfbr1	0.951311	0.149749	0.19994	20.3819	6.34262e-06	4.55832e-05	up
Cd68	3.04677	0.0330578	0.0745639	20.3463	6.46176e-06	4.59347e-05	up
Jun	1.45051	0.116011	0.177496	20.2079	6.94646e-06	4.91134e-05	up
Sdhb	0.714392	0.119945	0.106311	19.8237	8.49247e-06	5.84639e-05	up
Lrp6	0.516255	0.165831	0.232347	19.7481	8.83516e-06	6.05047e-05	up
Parp14	0.650314	0.635812	0.19103	19.6916	9.10006e-06	6.19942e-05	up
Actg1	6.19602	0.143988	0.0767731	19.1431	1.21278e-05	8.09343e-05	up
Degs1	0.387579	0.519194	0.159177	18.8696	1.39964e-05	9.11384e-05	up
Sh3bgrl3	5.77657	0.0108872	0.0587599	18.8953	1.38092e-05	9.11384e-05	up
Ppib	1.81338	0.14066	0.0715836	18.8416	1.42032e-05	9.19694e-05	up
Blnk	0.624673	0.341042	0.15769	18.7719	1.47322e-05	9.49249e-05	up
Tspo	1.4627	0.221138	0.0969066	18.6815	1.54477e-05	9.76117e-05	up
Trf	0.895271	0.524115	0.146328	18.5131	1.68737e-05	0.000105771	up
Itm2b	26.7119	0.256913	0.0610993	18.2948	1.89223e-05	0.000116747	up
Cd37	0.763887	0.072344	0.154928	18.2817	1.90528e-05	0.000117	up
Prpf40a	0.576701	0.442655	0.151581	18.2397	1.9478e-05	0.000119053	up
Pea15a	1.17952	0.0907492	0.12016	18.1037	2.0919e-05	0.000127266	up
Ccl9	0.549306	0.360905	0.176205	17.4884	2.89071e-05	0.000172651	up
Prelid1	0.866586	0.103136	0.100334	17.1147	3.51883e-05	0.000207326	up
Spop	0.556503	0.0034881	0.140066	16.9986	3.74067e-05	0.000217458	up
H3f3a	4.21675	0.0627101	0.0585047	16.8981	3.9441e-05	0.000227264	up
Nptn	0.706788	0.330445	0.130285	16.8779	3.98633e-05	0.000227691	up
Morf4l1	2.30883	0.130343	0.0687731	16.8813	3.97922e-05	0.000227691	up
Alox5ap	3.35991	0.108291	0.0783308	16.5574	4.71987e-05	0.000264961	up
Abca1	0.88351	0.211388	0.172234	16.5174	4.8206e-05	0.000269459	up
Eef1b2	2.58987	0.149608	0.075254	16.5	4.86499e-05	0.000270783	up
Emp3	1.94205	0.0977066	0.0928889	15.9513	6.49918e-05	0.000351278	up
Canx	1.43254	0.0694355	0.0944619	15.6448	7.64227e-05	0.000399843	up
Tnfaip8l2	0.88853	0.0179619	0.104059	15.5879	7.8756e-05	0.00041041	up
Slc29a1	0.658756	0.128594	0.142673	15.526	8.13775e-05	0.000420565	up
Lamp1	2.46037	0.31448	0.0803105	15.3883	8.75278e-05	0.000447213	up
Vdac2	0.879806	0.139267	0.104096	15.3643	8.86497e-05	0.000451182	up
Hnrnpab	0.43662	0.0451353	0.142785	15.3429	8.96593e-05	0.000454552	up
Tra2b	0.566092	0.12364	0.144656	15.2097	9.62071e-05	0.000483486	up
Il10ra	1.29292	0.077009	0.11696	15.1911	9.71603e-05	0.000483486	up
Sat1	2.98717	0.0707351	0.0877486	15.19	9.72148e-05	0.000483486	up
Psma5	0.450917	0.04662	0.131597	15.1993	9.67374e-05	0.000483486	up
Pltp	4.22568	0.410055	0.107913	14.8094	0.000118942	0.000580876	up
Rnf13	0.777009	0.269807	0.126998	14.7997	0.000119554	0.000581325	up
Gnas	1.15342	0.0424885	0.109119	14.7227	0.000124539	0.000603323	up
Tor1aip1	0.676486	0.0630097	0.145234	14.6591	0.00012881	0.000621709	up
Cd48	0.953986	0.183902	0.103568	14.5326	0.000137754	0.000660009	up
Cd33	0.856776	0.0272845	0.139673	14.5069	0.000139645	0.000664203	up
Mrpl30	0.415777	0.013297	0.139162	14.465	0.00014279	0.000674356	up
Gsn	0.749683	0.0810663	0.131411	14.4052	0.000147392	0.000693486	up
Chd9	1.17349	0.117763	0.10311	14.3494	0.000151828	0.000711795	up
Hnrnpf	1.57439	0.0463438	0.0807319	14.337	0.000152834	0.000713953	up
C1qb	28.3632	0.15791	0.0576573	14.1529	0.000168533	0.000776201	up
Gnai2	2.29362	0.0289208	0.0710006	14.1127	0.000172179	0.000790209	up
Srp14	0.969479	0.101892	0.107526	14.075	0.000175659	0.000803364	up
Atp13a2	0.513495	0.304676	0.161179	13.8617	0.000196768	0.000887493	up
Smagp	0.908626	0.00198018	0.146365	13.8743	0.000195454	0.000887493	up
Vsir	1.16882	0.129815	0.101008	13.7981	0.000203537	0.000911733	up
Sp110	0.46371	0.290807	0.188752	13.7121	0.000213081	0.000944781	up
Capg	0.373908	0.301214	0.24942	13.6984	0.000214638	0.000947889	up
Eif2ak2	0.342066	0.065053	0.22508	13.6931	0.000215246	0.000947889	up
Tmem176b	8.09881	0.0341649	0.0604345	13.3957	0.000252205	0.00107805	up
Csf2ra	1.38707	0.138124	0.120363	13.2394	0.000274121	0.00116035	up
Ppp1ca	1.25499	0.039439	0.0852567	13.1041	0.000294658	0.00122743	up
Tcea1	0.706536	0.115631	0.123147	12.9388	0.000321848	0.00131968	up
Zyx	0.614134	0.0685788	0.149576	12.9225	0.000324665	0.00132707	up
Fis1	1.02384	0.139879	0.101817	12.8894	0.000330444	0.00134185	up
Ifit3	0.518441	1.16842	0.323597	12.8544	0.000336687	0.00135922	up
Zfp36l1	2.49311	0.201384	0.111918	12.7365	0.000358586	0.00143434	up
Sh3glb1	1.85445	0.0394226	0.0840525	12.5	0.000406961	0.00161305	up
Mrps21	1.04057	0.0217506	0.10032	12.472	0.000413105	0.00163245	up
Hp1bp3	0.613778	0.00950857	0.145868	12.3984	0.000429706	0.00167844	up
H2-K1	6.88978	0.151401	0.0688217	12.3819	0.00043351	0.00168759	up
Rpl18	7.40721	0.0215687	0.0562978	12.2648	0.000461582	0.00179154	up
C1qc	23.7169	0.186595	0.0607528	12.2481	0.000465723	0.00180227	up
mt-Cytb	23.5918	0.132933	0.102944	12.1816	0.000482645	0.00186224	up
Fos	0.998051	0.694981	0.228733	12.1538	0.000489886	0.00187909	up
Ube2i	0.873479	0.151574	0.107013	12.1038	0.000503194	0.00191889	up
Clec4a3	0.930261	0.197253	0.117035	11.9814	0.000537341	0.00203134	up
Dok2	0.482338	0.262256	0.205816	11.8706	0.000570262	0.0021434	up
Rbms1	0.758801	0.145272	0.128218	11.8558	0.000574821	0.00214819	up
Serbp1	1.19591	0.0291377	0.0969735	11.6533	0.00064089	0.00237474	up
Ndufc1	0.806969	0.216896	0.122316	11.5792	0.00066695	0.00246432	up
Gm2a	0.936467	0.077766	0.115712	11.5154	0.000690226	0.00254314	up
Id2	0.294593	0.422919	0.346818	11.5001	0.000695911	0.00255689	up
Myl12a	1.30847	0.0613007	0.0834765	11.4228	0.000725489	0.00265067	up
Rtp4	0.613557	0.272884	0.169608	11.3896	0.000738557	0.0026909	up
Erp29	1.81248	0.105863	0.0752808	11.3762	0.000743905	0.00269537	up
Twf2	0.588297	0.119521	0.120151	11.1087	0.000859254	0.00303758	up
Gpi1	1.46998	0.204958	0.0882573	11.0196	0.000901532	0.00315826	up
Calr	1.21092	0.0114972	0.105835	11.0165	0.000903051	0.00315826	up
Ifi213	0.291651	0.321781	0.281618	10.9725	0.000924761	0.00322557	up
Clec4a1	1.12815	0.253819	0.113816	10.8421	0.000992197	0.00344242	up
Rasa4	0.552339	0.216866	0.166983	10.7478	0.00104403	0.00361269	up
Rpsa	8.92386	0.0484732	0.0604593	10.7109	0.00106505	0.00367567	up
Ywhah	1.5873	0.105811	0.0915965	10.6939	0.00107488	0.00369984	up
Bcl2a1b	0.461111	0.301519	0.174675	10.6443	0.00110412	0.00376608	up
Tmem176a	3.96547	0.0703625	0.0770502	10.6344	0.00111003	0.00377121	up
Cd72	0.775673	0.398644	0.17499	10.6012	0.00113013	0.00380981	up
Nfkbia	0.69455	0.0391797	0.151635	10.6018	0.00112979	0.00380981	up
Plec	0.209583	0.738909	0.352847	10.5289	0.0011752	0.00395159	up
1810037I17Rik	0.760499	0.12443	0.119889	10.5114	0.00118643	0.00397912	up
Prdx1	3.59249	0.167808	0.0751066	10.4487	0.00122736	0.00409536	up
mt-Co2	25.1795	0.0192531	0.0999678	10.4416	0.00123211	0.00410076	up
H2-DMb1	3.09067	0.162474	0.108588	10.4194	0.00124697	0.00413907	up
Ywhae	1.42887	0.261416	0.0833652	10.3148	0.00131969	0.0043262	up
Ubb	8.8264	0.12038	0.0421523	10.2999	0.0013304	0.0043504	up
Phf11b	0.366534	0.128705	0.207905	10.2803	0.00134459	0.00438339	up
Wdr1	0.867519	0.109551	0.106948	10.2256	0.00138501	0.00449527	up
Rab7	0.92646	0.318079	0.10774	10.1441	0.0014476	0.00467522	up
Tubb5	1.4695	0.0319189	0.102661	10.0719	0.00150544	0.00483814	up
Tnfrsf1a	0.813091	0.167743	0.104428	10.0277	0.00154201	0.00493141	up
U2af1	0.391273	0.173987	0.145311	10.0147	0.00155297	0.00495437	up
Ly86	4.04548	0.0267404	0.0656906	9.97538	0.00158648	0.00504893	up
Spcs1	0.855	0.205632	0.100526	9.91114	0.00164281	0.00517783	up
G3bp2	0.964987	0.00462553	0.111703	9.87892	0.00167183	0.00525661	up
Sec62	0.840348	0.107462	0.117506	9.82474	0.0017218	0.00538099	up
Ost4	2.05788	0.106061	0.0774263	9.59024	0.00195615	0.0060889	up
Ilk	0.633283	0.239988	0.120399	9.57572	0.00197168	0.00611126	up
Oas1a	0.406695	0.0723433	0.177894	9.52779	0.00202384	0.00621405	up
Susd3	0.426551	0.26349	0.161817	9.49476	0.0020606	0.0063121	up
Nol7	0.482967	0.393164	0.143453	9.45888	0.0021013	0.00642172	up
Nr3c1	0.643456	0.0426365	0.143768	9.38112	0.00219232	0.00668427	up
Anxa5	2.36648	0.184811	0.0772354	9.35987	0.00221788	0.00672362	up
Rps26	8.83243	0.0113653	0.0581775	9.3615	0.00221591	0.00672362	up
Gnb2	2.07067	0.0999954	0.065426	9.32769	0.00225717	0.00680271	up
Gbp7	0.473217	0.278678	0.220867	9.31863	0.00226835	0.0068207	up
Slfn2	1.00561	0.0808731	0.124698	9.29786	0.00229421	0.00688264	up
Rsrp1	3.21339	0.0492925	0.079019	9.21267	0.00240346	0.00719388	up
mt-Co3	32.073	0.135657	0.0996735	9.16553	0.00246616	0.00734793	up
Nrros	1.226	0.328354	0.110653	9.04436	0.00263506	0.00781556	up
Stard8	0.515229	0.242946	0.200752	8.97165	0.00274201	0.00809605	up
Clec4a2	1.62871	0.265875	0.100708	8.93856	0.00279212	0.00818856	up
Ddx39b	0.781668	0.231736	0.124676	8.94029	0.00278948	0.00818856	up
Tsc22d3	0.865735	0.423237	0.144599	8.90792	0.00283937	0.00830849	up
Slamf9	0.93529	0.191998	0.161581	8.88373	0.00287723	0.00838177	up
Gpx3	0.821795	0.0102394	0.230074	8.84706	0.00293562	0.00850395	up
Sec61b	1.48817	0.0264533	0.0809617	8.84099	0.0029454	0.00850459	up
Mx1	0.17533	1.31885	0.477952	8.82702	0.00296803	0.00853226	up
Rex1bd	0.491392	0.0690235	0.132799	8.81538	0.00298702	0.00856804	up
Rpn1	0.662815	0.0713886	0.114907	8.7939	0.00302239	0.00865052	up
Hmgb1	2.08688	0.132757	0.0763231	8.7486	0.00309839	0.00882941	up
Aplp2	0.762091	0.361557	0.144281	8.7321	0.00312655	0.00889029	up
Sumo2	1.67825	0.21157	0.0734792	8.71829	0.00315033	0.00891912	up
Fam105a	0.803396	0.124709	0.116063	8.6394	0.0032897	0.00929357	up
Il10rb	0.693856	0.221295	0.130043	8.6148	0.00333442	0.00939962	up
Srp9	0.811044	0.0661796	0.110437	8.56997	0.00341753	0.00961318	up
Rnpep	0.856783	0.0739938	0.116943	8.5522	0.00345106	0.00968666	up
Zfp36l2	1.64881	0.147711	0.105577	8.53223	0.00348912	0.00977254	up
Cd52	5.1627	0.0337417	0.0965258	8.50637	0.00353905	0.00987009	up
Gm42031	1.15315	0.178122	0.129292	8.4946	0.00356201	0.009913	up
Mpp1	0.869394	0.177813	0.137154	8.46329	0.00362385	0.0100637	up
Cycs	0.498308	0.122718	0.147913	8.40156	0.00374899	0.0103726	up
Tmem37	0.395963	0.0975394	0.173864	8.40061	0.00375094	0.0103726	up
Ctss	9.69108	0.122848	0.0758127	8.35513	0.003846	0.010613	up
Tap1	0.437532	0.299887	0.17725	8.33965	0.00387891	0.0106813	up
Atxn7l3b	0.681523	0.102992	0.127117	8.19438	0.00420204	0.0114745	up
Slc3a2	0.661849	0.28001	0.137357	8.18059	0.00423409	0.0115139	up
Rpl6	8.18676	0.122817	0.0559527	8.18168	0.00423156	0.0115139	up
Atp5k	0.784083	0.213926	0.117042	8.14999	0.00430613	0.0116613	up
Ier2	0.624742	0.280755	0.182558	8.08927	0.00445281	0.0120032	up
Ifngr1	2.25897	0.148431	0.0855707	8.08638	0.00445991	0.0120032	up
Ssu72	0.580514	0.284955	0.13277	7.99771	0.00468366	0.0125281	up
Vim	1.63137	0.291957	0.173051	7.90024	0.00494283	0.013114	up
Cd74	147.216	0.341748	0.120483	7.84829	0.00508688	0.0134417	up
Cndp2	0.937004	0.301822	0.115748	7.83043	0.0051374	0.0134934	up
Rhob	0.665001	0.334707	0.152697	7.81721	0.00517509	0.0135652	up
0610012G03Rik	0.629343	0.11311	0.133402	7.75889	0.00534488	0.0139543	up
Cd79b	0.284831	0.241134	0.228511	7.68634	0.00556403	0.0143934	up
Lgmn	4.85475	0.0836739	0.0774281	7.67853	0.00558816	0.0144104	up
Gpx1	6.54756	0.0528808	0.0743879	7.67578	0.00559669	0.0144104	up
Psmb1	0.726126	0.0082389	0.105422	7.66712	0.0056236	0.0144512	up
Grina	0.827492	0.128839	0.120645	7.64021	0.00570813	0.0145825	up
Tm9sf2	0.64306	0.0608552	0.138901	7.57947	0.00590369	0.0149362	up
Slfn8	0.286507	0.336526	0.236325	7.54208	0.00602745	0.0152199	up
Dok3	0.481803	0.288083	0.149692	7.4909	0.00620114	0.0155385	up
Cd14	1.42529	0.182007	0.116936	7.49538	0.00618574	0.0155385	up
Aldh2	1.76172	0.0508583	0.0963649	7.3604	0.00666758	0.0164241	up
Egr1	0.222805	1.62555	0.588039	7.33818	0.00675052	0.016566	up
mt-Co1	36.2891	0.126444	0.0990933	7.24378	0.00711472	0.0173945	up
Glmp	0.729787	0.157911	0.110964	7.20826	0.00725689	0.017709	up
Nop10	1.07012	0.00216672	0.101891	7.19765	0.00729992	0.0177808	up
Ddost	0.845838	0.115463	0.101712	7.19074	0.00732809	0.0177839	up
Serpinb6a	0.755249	0.168451	0.184093	7.15809	0.00746265	0.0180762	up
Trmt112	1.43302	0.184264	0.084568	7.11618	0.00763914	0.0184489	up
Cmpk1	0.556452	0.345512	0.132717	7.04167	0.00796347	0.0191123	up
Fermt3	0.928798	0.177343	0.101022	7.02133	0.00805442	0.0192952	up
Cxcl16	1.43177	0.147973	0.110886	7.01265	0.00809359	0.019309	up
Rps5	9.60816	0.00893052	0.0608979	7.01024	0.00810447	0.019309	up
Mfsd1	0.545014	0.306122	0.13538	6.98197	0.00823347	0.0195097	up
Igtp	0.211023	0.658617	0.271769	6.95662	0.00835098	0.0196812	up
Lgals3bp	0.871219	0.190917	0.125742	6.95979	0.00833617	0.0196812	up
Prdx2	0.940764	0.18346	0.101332	6.91834	0.00853163	0.0200708	up
Klf2	0.508625	0.429779	0.207379	6.90635	0.00858901	0.0200974	up
C5ar1	1.26769	0.275067	0.156174	6.89039	0.00866603	0.0202414	up
Atp6v0c	3.26177	0.0189116	0.0731609	6.82856	0.00897118	0.0208795	up
Zfp36	1.00499	0.407864	0.157255	6.82176	0.0090054	0.020922	up
Hexb	4.62517	0.243568	0.116722	6.79244	0.00915445	0.021193	up
Cox7c	2.60573	0.137784	0.0622594	6.78359	0.00919995	0.0212607	up
Nme2	0.832182	0.11121	0.11223	6.76286	0.00930744	0.0214333	up
H2-T23	0.805822	0.32745	0.128627	6.73568	0.00945034	0.0216481	up
Stab1	4.44418	0.176866	0.141721	6.74074	0.00942353	0.0216481	up
Myl6	3.51943	0.102314	0.0630167	6.73658	0.00944558	0.0216481	up
Calm3	0.838697	0.0215112	0.10914	6.71924	0.00953783	0.0217722	up
Samd9l	0.262323	0.0326522	0.239655	6.6494	0.00991894	0.0224852	up
Bloc1s1	0.778453	0.248909	0.118212	6.58825	0.0102654	0.0231503	up
Scpep1	0.669682	0.18578	0.119706	6.57129	0.0103637	0.0233166	up
Iigp1	0.271741	0.901889	0.36199	6.48113	0.0109026	0.0241775	up
Rpl7a	4.95229	0.0626154	0.0592663	6.4776	0.0109242	0.0241775	up
Mafb	1.21993	0.231364	0.159144	6.33721	0.0118231	0.0260347	up
Cd9	0.341969	0.329514	0.259624	6.31536	0.0119696	0.0262998	up
Xaf1	0.288992	0.527973	0.220851	6.2294	0.0125646	0.0272095	up
P2rx4	0.751133	0.156765	0.126753	6.23212	0.0125454	0.0272095	up
Taf6l	0.677357	0.0773361	0.112899	6.21773	0.0126477	0.0273442	up
Ywhag	0.543917	0.0453018	0.141465	6.18553	0.0128799	0.0276632	up
Rpl37	12.4749	0.126619	0.0536253	6.11269	0.0134215	0.0286851	up
Polr1d	0.782598	0.179294	0.104354	6.10763	0.0134599	0.0287204	up
Mt1	2.12013	0.117305	0.115765	6.05933	0.013833	0.0293267	up
P4hb	0.859093	0.100224	0.108	6.05923	0.0138338	0.0293267	up
Metrnl	0.186366	0.430382	0.255504	6.0514	0.0138953	0.0294094	up
Eif4a1	1.56234	0.019126	0.0863475	6.03093	0.0140573	0.0296975	up
Ccl6	1.99791	0.130141	0.1296	5.97939	0.014474	0.0303884	up
Tomm22	0.570486	0.000991375	0.118963	5.98024	0.014467	0.0303884	up
Laptm4a	2.65704	0.140399	0.0735601	5.95698	0.0146591	0.0306786	up
Prpf8	0.504485	0.00340662	0.148818	5.95828	0.0146483	0.0306786	up
Plekho1	0.859729	0.0142834	0.116499	5.91699	0.0149955	0.0312826	up
Rpl38	8.73604	0.127897	0.05476	5.91147	0.0150426	0.0313308	up
Il2rg	0.390518	0.301953	0.208697	5.89247	0.0152058	0.031471	up
Batf3	0.278842	0.21206	0.210348	5.89804	0.0151577	0.031471	up
Rpn2	0.77764	0.100111	0.10519	5.88854	0.0152397	0.031471	up
Naaa	0.479075	0.0387761	0.194553	5.88738	0.0152498	0.031471	up
Fcer1g	15.5241	0.019015	0.0394309	5.89007	0.0152265	0.031471	up
Pcbp2	2.57191	0.0793902	0.0660523	5.8728	0.0153766	0.0316734	up
Selenop	19.111	0.225256	0.0920604	5.86307	0.0154618	0.0317988	up
Arl6ip1	1.40175	0.0791861	0.0817122	5.85239	0.0155559	0.0319421	up
Reep5	1.52591	0.0779983	0.0787752	5.84805	0.0155943	0.0319707	up
Sult1a1	0.589242	0.301155	0.153855	5.84427	0.0156279	0.0319895	up
Adgre1	2.20841	0.209661	0.094288	5.78806	0.0161354	0.0326787	up
Rab11a	0.696091	0.265181	0.124445	5.7845	0.0161681	0.032686	up
Ier3	0.239397	0.736807	0.318593	5.6944	0.0170192	0.0341137	up
Ube2b	0.568401	0.195474	0.133265	5.6932	0.0170308	0.0341137	up
Crip1	2.47064	0.0253844	0.143926	5.48358	0.0191959	0.0381006	up
M6pr	0.863289	0.108668	0.103003	5.43696	0.019715	0.0390124	up
Irf1	0.494458	0.291869	0.204474	5.3974	0.0201668	0.0396919	up
Mdh1	0.914317	0.0289887	0.114851	5.38749	0.0202816	0.0397634	up
Ccl12	1.52423	0.692948	0.296599	5.31945	0.0210887	0.0411702	up
Itgb2	0.797407	0.152107	0.121951	5.26621	0.0217433	0.0422589	up
Adipor1	0.911757	0.212216	0.111785	5.23167	0.0221793	0.0430423	up
Fxyd2	0.525504	0.292027	0.242053	5.1369	0.0234225	0.0451868	up
Ighm	1.70237	0.220923	0.0985945	5.12415	0.0235951	0.0454528	up
Tmem59	1.28016	0.0642571	0.087929	5.00617	0.0252571	0.0480878	up
Psap	14.8861	0.149199	0.0785676	4.94427	0.0261773	0.0495512	up
Ttr	2.0676	2.84081	0.300266	73.9318			X
Ccl4	0.289603	1.53764	0.726985	3.73422			X
Rsad2	0.178954	1.14058	0.569174	4.41877	0.0355457	0.063171	X
Ifit3b	0.133846	1.10097	0.516443	4.42404	0.035436	0.063171	X
Cd79a	0.0741701	0.796432	1.3849	0.352682			X
Ifit2	0.157672	0.691725	0.532428	2.10459	0.146857	0.193249	X
Cxcl10	0.47585	0.657754	0.822371	0.619887			X
Sparc	0.52453	0.640625	0.281603	14.6676			X
Oasl1	0.0999851	0.598332	0.480479	1.7182	0.189925	0.23617	X
Ifit1	0.135358	0.574762	0.471624	2.75812	0.0967619	0.139696	X
Socs1	0.106395	0.568954	0.495251	1.77186	0.183152	0.229247	X
Mmp9	0.213729	0.548832	0.453704	1.68611	0.194114	0.240117	X
Il1b	0.404512	0.539007	0.363021	3.13272	0.0767357	0.116035	X
Phf11d	0.25404	0.510505	0.265198	4.32853	0.0374786	0.0660674	X
Usp18	0.17184	0.477301	0.366724	1.9349	0.164223	0.211421	X
Rgs1	0.186972	0.47593	0.618182	3.03525	0.081474	0.121376	X
Isg15	0.814085	0.473221	0.247133	4.26999	0.0387911	0.0678064	X
Nupr1	0.198481	0.467286	0.295668	2.62807	0.104989	0.149593	X
Ccl2	0.28063	0.46255	0.363766	1.78784	0.18119	0.227444	X
Cmpk2	0.111395	0.45876	0.502826	0.853742	0.355496	0.399132	X
Adgre5	0.260335	0.442874	0.270619	3.2051	0.0734092	0.112303	X
C4b	0.414906	0.430135	0.370093	2.05581	0.151627	0.19813	X
Ccl7	0.42244	0.420976	0.365435	1.33517	0.247887	0.291842	X
Egfl7	0.185037	0.408928	0.442539	2.44773	0.117695	0.162702	X
Rcn3	0.160662	0.392968	0.340747	1.94257	0.16339	0.210692	X
Ccnd2	0.275234	0.381922	0.271493	4.59784	0.0320123	0.0579144	X
Lilr4b	0.2302	0.378566	0.282373	3.72083	0.0537377	0.0880814	X
H1f0	0.439079	0.359984	0.189445	3.6436	0.0562853	0.0909716	X
Junb	1.07763	0.350619	0.170253	4.34453	0.0371279	0.0656261	X
Plp2	0.0955043	0.33847	0.437031	3.04394	0.081039	0.120865	X
Irf7	0.829594	0.328596	0.237087	2.01092	0.15617	0.203053	X
Dusp1	0.233808	0.323878	0.301674	1.86669	0.171854	0.2176	X
Cd300ld	0.582327	0.314379	0.161745	3.82719	0.0504274	0.0837044	X
Ifi207	0.724256	0.310871	0.151358	4.28036	0.0385552	0.0678064	X
Anxa2	0.441881	0.294833	0.199901	4.10018	0.0428788	0.0741871	X
Cebpd	0.731166	0.293523	0.139358	4.82295	0.0280832	0.0524754	X
Lpl	0.521123	0.288218	0.227231	2.8115	0.0935907	0.13592	X
Pld3	0.544223	0.285035	0.154615	3.94837	0.0469169	0.0794913	X
Cd300a	0.624617	0.278659	0.139844	4.33928	0.0372428	0.0657403	X
Pla2g15	0.655186	0.273538	0.137849	3.94348	0.0470533	0.0796193	X
Daxx	0.236524	0.271694	0.26637	4.40458	0.0358426	0.0636121	X
Ifi211	0.355011	0.270812	0.231038	2.04464	0.152743	0.19919	X
Atf3	0.192205	0.270562	0.285279	3.63919	0.0564343	0.0909716	X
Litaf	0.883855	0.270129	0.12684	4.73773	0.029508	0.0545149	X
March5	0.263834	0.266676	0.21323	1.63521	0.200984	0.245459	X
Rbbp4	0.46708	0.263487	0.150029	4.4755	0.034384	0.0617779	X
Slfn1	0.172882	0.248537	0.352345	0.809262	0.368339	0.410031	X
Mcm6	0.172133	0.24674	0.300094	2.23419	0.134988	0.181091	X
H2-T22	0.495494	0.244576	0.167796	2.89615	0.0887913	0.130429	X
H2-Aa	41.9431	0.234995	0.125528	3.55059	0.0595242	0.0947173	X
Hfe	0.680516	0.229871	0.132377	3.95985	0.0465978	0.0790531	X
Icam1	0.313897	0.229575	0.293659	1.81758	0.177602	0.223799	X
Pim1	0.210666	0.228503	0.282807	1.18479	0.276383	0.320695	X
Siglece	0.51289	0.226002	0.165912	2.53654	0.111238	0.156283	X
Oasl2	0.655916	0.225505	0.192242	3.67039	0.0553873	0.0899958	X
Glrx3	0.404745	0.225405	0.153947	2.30767	0.128737	0.174591	X
Cnih4	0.518133	0.225146	0.138993	2.91543	0.0877362	0.129088	X
Pepd	0.554765	0.223451	0.14187	2.49768	0.114014	0.158987	X
Dbnl	0.47825	0.222257	0.149639	2.26627	0.132218	0.177923	X
Cytip	0.186115	0.221769	0.280071	0.642433	0.422831	0.458974	X
Cat	0.569405	0.212065	0.134488	2.68451	0.101328	0.145486	X
Prkar1a	0.773328	0.208155	0.113056	3.96527	0.0464482	0.0789016	X
Ifi205	0.0648765	0.206537	0.819708	0.64814	0.420778	0.457505	X
Sdc3	0.691968	0.205623	0.143238	4.78811	0.0286568	0.0533687	X
Serpinf1	0.541474	0.205237	0.170808	1.97168	0.16027	0.207557	X
Ebi3	0.551433	0.202788	0.137046	3.35088	0.0671692	0.105092	X
H2-Eb1	38.2605	0.200461	0.12963	2.43783	0.11844	0.162902	X
Cdkn1a	0.249876	0.19985	0.34501	3.05218	0.0806287	0.120528	X
Ifi204	0.480969	0.195296	0.203944	3.32518	0.0682267	0.106365	X
Gpr183	0.556772	0.193839	0.163422	2.46324	0.116538	0.161474	X
Lap3	0.293117	0.191889	0.207541	1.43082	0.231631	0.27543	X
Marcksl1	1.77307	0.188419	0.140333	1.95994	0.16152	0.208762	X
Acvrl1	0.384871	0.186397	0.168795	1.58257	0.208391	0.253135	X
Ms4a6d	1.0093	0.186289	0.119539	3.63872	0.0564505	0.0909716	X
Herpud1	0.547182	0.1844	0.147022	2.57593	0.1085	0.153425	X
1110008F13Rik	0.648752	0.183714	0.117474	3.83553	0.050177	0.0833945	X
Stk17b	0.889339	0.183164	0.143955	1.64563	0.199555	0.244249	X
Mob1a	0.443114	0.182753	0.14635	3.61263	0.0573423	0.092029	X
Ube2d2a	0.797716	0.18264	0.108719	3.68514	0.0548994	0.0894252	X
Idh2	0.668352	0.181026	0.137249	1.79582	0.180218	0.226659	X
Asah1	1.76732	0.179731	0.0850325	4.52882	0.0333286	0.0601293	X
Tcn2	0.66019	0.177905	0.132917	2.12146	0.145248	0.191576	X
Cd40	0.137386	0.173668	0.340869	1.2959	0.254964	0.298829	X
Fcgr2b	2.26187	0.171407	0.0961552	3.34225	0.0675222	0.105519	X
H2-M3	0.474038	0.171261	0.144716	1.55258	0.212756	0.256957	X
Ifi47	0.444948	0.169982	0.220056	3.06966	0.0797659	0.119649	X
Glipr1	0.239039	0.169701	0.245974	1.64947	0.19903	0.244214	X
Sp100	0.664619	0.168326	0.149547	4.26901	0.0388135	0.0678064	X
Trafd1	0.593748	0.167804	0.148353	1.39245	0.237992	0.281204	X
Fkbp1a	1.24156	0.167211	0.0984095	4.60654	0.0318502	0.0577009	X
Gatm	0.910245	0.167107	0.140923	3.2855	0.0698945	0.108192	X
Lrp1	0.798812	0.167063	0.135223	2.84083	0.0918966	0.134003	X
Bsg	1.32033	0.166812	0.0903898	4.91418	0.0266371	0.050276	X
Sqstm1	0.971258	0.166687	0.1168	2.12961	0.144477	0.190978	X
Mgl2	3.92624	0.166666	0.145504	1.4959	0.221303	0.264834	X
Vdac1	0.496622	0.165295	0.136197	1.90126	0.167938	0.214305	X
Tpp1	0.755447	0.16197	0.122522	3.85757	0.0495221	0.0828323	X
Dynlrb1	0.575947	0.161639	0.125982	1.68938	0.193683	0.239902	X
Tpi1	0.617304	0.161097	0.122738	2.14151	0.143361	0.190068	X
Hmox1	0.519389	0.160864	0.162586	2.82672	0.0927074	0.135035	X
P2ry12	0.430856	0.156944	0.183022	0.893463	0.344541	0.388499	X
Dnajc19	0.587788	0.156713	0.128292	1.90464	0.167559	0.214265	X
Aldoa	1.55618	0.156357	0.0926509	2.87807	0.0897936	0.131376	X
Lat2	0.42777	0.156262	0.174592	2.14085	0.143423	0.190068	X
Uba52	1.26193	0.154985	0.0956901	2.66205	0.102769	0.146908	X
Nenf	0.70461	0.151943	0.12606	3.47808	0.062187	0.0982374	X
Tgtp2	0.23706	0.151682	0.281928	1.09212	0.296003	0.339923	X
Chmp4b	0.463326	0.149934	0.147079	2.44637	0.117797	0.162702	X
Sptssa	0.887854	0.148653	0.113386	2.40033	0.121309	0.165976	X
Ms4a4a	0.82661	0.147686	0.175218	1.69641	0.192758	0.23921	X
Btg1	0.605249	0.147493	0.148743	4.36006	0.036791	0.0652069	X
Btg2	1.00975	0.146563	0.157667	3.80102	0.0512214	0.0846998	X
Gm34084	0.553322	0.145884	0.166486	4.67397	0.0306231	0.0559427	X
Sumo1	0.620999	0.145361	0.122164	1.5823	0.20843	0.253135	X
Axl	1.1538	0.144719	0.122491	4.0657	0.0437624	0.0753713	X
Pnrc1	0.855671	0.144293	0.1214	1.89064	0.16913	0.215406	X
Isg20	0.0940696	0.141427	0.403112	2.73356	0.0982601	0.141703	X
Sdc4	0.529412	0.139326	0.194237	1.21911			X
Tlr2	0.525283	0.136802	0.171353	1.57528	0.209442	0.254128	X
Eif4b	0.550021	0.136477	0.134398	1.55768	0.212005	0.256514	X
Ctsb	13.9916	0.135749	0.0731995	3.87254	0.0490822	0.0823296	X
Entpd1	0.585869	0.133922	0.144494	1.90929	0.167042	0.214206	X
Atp5c1	1.29704	0.132947	0.0898991	3.54465	0.0597379	0.0947337	X
Cd47	1.03359	0.132023	0.109485	1.68249	0.194594	0.240122	X
Cd83	0.560927	0.131322	0.21774	0.857302	0.354495	0.398449	X
Smdt1	1.12711	0.13	0.0916772	2.45067	0.117475	0.1626	X
Txndc17	0.681585	0.129499	0.11921	2.27542	0.131439	0.17724	X
Folr2	1.18877	0.128777	0.223589	0.448969	0.502825	0.534711	X
Nap1l1	0.851111	0.12743	0.115571	1.31611	0.251291	0.295318	X
Serinc3	2.76226	0.127344	0.0872749	3.93191	0.0473782	0.0800654	X
Lcp2	0.522708	0.126285	0.146667	1.09067	0.296322	0.339991	X
Slc11a1	0.766415	0.125771	0.13234	2.18346	0.1395	0.185811	X
Rnase4	1.4532	0.12527	0.126899	1.114	0.291214	0.335011	X
Ccnd3	0.400441	0.12436	0.17706	4.78034	0.0287865	0.0533687	X
Ms4a7	4.38566	0.12426	0.100736	3.8614	0.0494092	0.0827493	X
Park7	1.00733	0.123506	0.0979427	2.57134	0.108816	0.153539	X
Csf1r	7.2622	0.122017	0.0669828	3.64918	0.0560967	0.0909226	X
Rnf187	0.701981	0.121802	0.111492	1.84265	0.17464	0.220492	X
Snrpd3	0.502792	0.121487	0.129962	4.04683	0.0442543	0.0759641	X
Zbp1	0.286748	0.119539	0.242433	4.48452	0.0342031	0.0615374	X
Jund	0.661885	0.11745	0.148438	1.1149	0.29102	0.335011	X
Fam213b	0.517274	0.117381	0.165437	1.90192	0.167863	0.214305	X
Lyz2	50.7925	0.115714	0.0687388	3.74784	0.0528757	0.0871051	X
Ehd4	2.46672	0.114317	0.0864954	1.91648	0.166245	0.213813	X
Atp6ap2	0.615142	0.113279	0.1218	4.8405	0.0277988	0.0520183	X
Tmem14c	0.837581	0.112396	0.10205	4.86312	0.0274367	0.0515622	X
Tuba1c	0.397873	0.112342	0.172409	2.97384	0.084621	0.125492	X
Eif5	0.723262	0.112103	0.124713	1.68392	0.194404	0.240117	X
Fam174a	0.809306	0.111985	0.118408	1.71803	0.189947	0.23617	X
Smc1a	0.384724	0.10871	0.166125	0.782672	0.376325	0.417598	X
Fcrls	3.84834	0.108099	0.12821	0.732659	0.392023	0.431985	X
Ppp4c	0.683128	0.10697	0.113297	2.29258	0.129994	0.175834	X
Ptpn1	0.616899	0.106861	0.130058	2.60686	0.106403	0.151277	X
Klf6	0.761052	0.105568	0.135102	3.17803	0.0746348	0.113729	X
Arpc3	3.01348	0.103951	0.0573012	3.31214	0.0687698	0.106966	X
Wdr83os	0.689148	0.101845	0.116458	4.07431	0.04354	0.0751324	X
Gas6	2.41088	0.0999363	0.145129	1.99884	0.15742	0.204474	X
Snx2	1.99846	0.0995646	0.110308	3.16872	0.0750611	0.114163	X
2010107E04Rik	1.34801	0.0987759	0.08811	1.31124	0.25217	0.296085	X
Necap2	0.643446	0.0984095	0.128426	1.79256	0.180614	0.226939	X
Fam49b	1.21442	0.0959346	0.102854	2.08071	0.149171	0.195584	X
Pa2g4	0.518683	0.095817	0.13867	0.495193	0.48162	0.515515	X
Tmem50a	1.68656	0.09558	0.0776873	1.59777	0.206219	0.251149	X
Mrc1	6.41362	0.0955611	0.11036	3.2595	0.0710108	0.109201	X
Ifi35	0.302275	0.0943307	0.183941	2.3386	0.126203	0.172131	X
Rab11b	0.69407	0.0941591	0.115862	1.02622	0.311047	0.354707	X
Cd300c2	1.80022	0.0932176	0.096628	3.48883	0.0617841	0.097719	X
Ifitm2	2.89735	0.0931713	0.0993483	1.8753	0.17087	0.216777	X
Ms4a6b	1.59203	0.0927967	0.0992952	1.05096	0.305285	0.349359	X
Lyl1	0.701155	0.0908922	0.13529	1.23557	0.266326	0.310818	X
Vapa	0.614593	0.0908711	0.117849	3.66628	0.055524	0.0901059	X
H2-Q4	0.521061	0.0899532	0.154213	0.607308	0.435803	0.472271	X
Fam129a	0.418986	0.0895879	0.171878	1.03377	0.309275	0.353303	X
Rps27a	12.6336	0.0888121	0.055582	4.77917	0.0288061	0.0533687	X
Tmem119	0.254292	0.088498	0.27975	2.1426	0.143259	0.190068	X
Pgls	0.708557	0.0880156	0.123292	1.0202	0.312471	0.356021	X
Pebp1	0.785629	0.0872746	0.11199	3.01262	0.0826188	0.122802	X
Arf1	1.55853	0.085823	0.0751062	2.66326	0.10269	0.146908	X
Fau	24.9156	0.0852704	0.0533917	3.07244	0.0796297	0.119582	X
Tmbim6	3.26981	0.0828485	0.059357	1.96868	0.160588	0.207763	X
Slfn5	0.677718	0.0822008	0.170747	1.66925	0.196358	0.241773	X
Nfe2l2	0.876342	0.0820552	0.119599	0.47192	0.492105	0.524592	X
Scand1	1.15629	0.0815195	0.0936626	0.844226	0.358191	0.401125	X
Cd302	0.919691	0.0811228	0.105812	0.680073	0.409562	0.44829	X
Ndufs7	0.766997	0.0809275	0.109587	1.3388	0.247245	0.291348	X
Skp1a	0.840763	0.0808953	0.1016	0.751004	0.386159	0.426241	X
Ctsa	2.84235	0.0802605	0.0737485	4.4188	0.0355451	0.063171	X
Sdcbp	1.80241	0.0798016	0.0758215	2.99558	0.0834919	0.123958	X
Eif1	6.11186	0.0796574	0.0505474	2.93931	0.0864479	0.127479	X
Selenow	1.865	0.0795955	0.0886333	0.943547	0.331367	0.375263	X
Atp6ap1	1.05266	0.0793868	0.0934089	3.44208	0.0635556	0.100157	X
Pdia3	2.5115	0.0792657	0.0801127	2.44177	0.118143	0.162835	X
Dnase2a	0.556823	0.078228	0.145988	3.25866	0.0710473	0.109201	X
Hnrnpk	1.5456	0.0780314	0.0799686	1.30155	0.25393	0.297884	X
Ndufa3	1.4317	0.0773165	0.0807185	2.50113	0.113765	0.158809	X
Timp2	1.01808	0.0771603	0.122389	3.31201	0.0687755	0.106966	X
P2ry6	2.00413	0.076908	0.0869037	3.30428	0.0690998	0.107215	X
Pdcd6ip	0.575409	0.0767349	0.129996	0.407052	0.523469	0.552621	X
Trem2	1.70566	0.0747069	0.114801	3.72837	0.0534955	0.0879047	X
Edf1	1.05548	0.0733538	0.091639	2.71274	0.0995497	0.143246	X
Arhgdia	1.67607	0.0722976	0.0750688	3.97301	0.0462351	0.0786417	X
Hck	0.728843	0.0722544	0.123874	3.44312	0.0635157	0.100157	X
Tecr	0.60139	0.0708011	0.122039	0.962822	0.326477	0.370366	X
Vps28	0.638056	0.0703088	0.118717	1.59974	0.20594	0.251043	X
Comt	0.888204	0.0679399	0.108409	4.45814	0.0347353	0.0623235	X
Ndufv3	0.877609	0.0671481	0.109524	3.54578	0.059697	0.0947337	X
Lgals3	0.818341	0.0664856	0.230719	2.89287	0.0889722	0.130466	X
Lamp2	1.268	0.0664376	0.105413	2.50714	0.113332	0.158374	X
Ndufb8	1.14282	0.0664189	0.091925	4.44984	0.0349045	0.0624557	X
Ndfip1	1.02995	0.0663218	0.104097	1.1839	0.276562	0.320695	X
Adam15	0.80456	0.0657466	0.120269	0.764234	0.382007	0.422371	X
Fmnl1	0.697094	0.0656774	0.12542	3.73707	0.0532177	0.0875582	X
Cct4	0.583457	0.0645409	0.121594	2.88322	0.0895069	0.131103	X
Snu13	0.677973	0.062447	0.119237	4.44985	0.0349043	0.0624557	X
Chchd2	1.52596	0.0623327	0.0783164	2.42099	0.119719	0.164143	X
Cmtm7	1.33376	0.0622805	0.0913787	1.40748	0.235475	0.279447	X
Tpm4	0.537961	0.061996	0.140646	1.87776	0.170589	0.216632	X
Psma2	0.782614	0.0619472	0.1065	0.341989	0.558683	0.586013	X
Itgb5	0.636425	0.0618268	0.154287	4.09694	0.0429609	0.074231	X
Sppl2a	0.53025	0.0616792	0.152387	1.3681	0.242138	0.285587	X
Uqcrh	1.9201	0.0616785	0.0813399	1.64383	0.1998	0.244249	X
Chmp2a	0.698148	0.0613797	0.11497	0.689019	0.406498	0.44531	X
Tma7	1.19791	0.061027	0.0897251	1.44783	0.228877	0.272899	X
Epn1	1.1288	0.060398	0.098317	3.25899	0.0710329	0.109201	X
S100a6	0.969216	0.0599423	0.284991	1.17289	0.278808	0.322726	X
Fxyd5	2.40897	0.0595594	0.115282	3.15648	0.075626	0.114888	X
Usmg5	1.23937	0.0574069	0.0881775	2.31257	0.128332	0.174308	X
Dmac1	0.579002	0.0562182	0.132864	0.66187	0.415901	0.453742	X
Vcp	1.04358	0.0547904	0.0957374	1.95159	0.162415	0.209713	X
Anapc11	0.856252	0.0535338	0.113427	4.17093	0.0411232	0.0713384	X
Ghitm	0.525755	0.052545	0.13169	0.257446	0.61188	0.63519	X
Sri	0.770273	0.0523172	0.111153	0.227202	0.633606	0.655662	X
Cd63	2.86833	0.0515651	0.111969	0.249738	0.61726	0.639953	X
Ube2n	0.529906	0.0510658	0.127101	0.849027	0.356828	0.399941	X
Ndufa1	0.738961	0.0510414	0.115243	2.81311	0.0934972	0.13592	X
Jpt1	1.15183	0.0508113	0.0926251	0.483111	0.487016	0.520014	X
H2-Ab1	25.8104	0.0506997	0.121576	0.308451	0.578632	0.604031	X
Lipa	0.706914	0.0501793	0.13299	3.69989	0.0544161	0.0889703	X
Calm2	2.24341	0.0489906	0.0872769	1.13194	0.287361	0.331453	X
Ppfia4	0.507742	0.0486451	0.148026	0.249472	0.617447	0.639953	X
Ndufa7	1.53152	0.048449	0.0799826	2.2863	0.13052	0.176364	X
Rpl13a	0.983343	0.0483139	0.100606	0.649099	0.420435	0.457505	X
Rbm3	1.1647	0.0475872	0.107421	0.410514	0.521709	0.551474	X
Dhrs3	0.806332	0.0468419	0.133542	4.0645	0.0437937	0.0753713	X
Arpc4	1.8826	0.0447691	0.0695748	1.60876	0.204666	0.249723	X
Snx5	2.69684	0.0445908	0.074559	1.39345	0.237823	0.281204	X
Rrp1	0.538629	0.0440171	0.134721	2.35237	0.125092	0.170794	X
Rap1a	1.29403	0.0431221	0.0860848	0.788304	0.374614	0.416308	X
Ndufb11	1.01001	0.0430755	0.0929586	0.248634	0.618039	0.640059	X
Rpl9	10.2248	0.0427432	0.0500946	4.27361	0.0387085	0.0678064	X
Pabpc1	2.59936	0.0413202	0.0753912	0.304768	0.580909	0.605924	X
Ywhaz	1.35783	0.0409901	0.0858851	0.440934	0.506672	0.537928	X
Rpl24	5.74009	0.0408011	0.0602916	0.654341	0.418565	0.456236	X
Tpd52	0.969085	0.0403815	0.103337	0.821943	0.364613	0.406576	X
Snrpb	1.02595	0.0388942	0.0910509	3.27022	0.0705483	0.108946	X
Coro1b	1.5348	0.0383646	0.0821455	0.258422	0.611206	0.634994	X
Txnip	3.1616	0.03826	0.0807144	0.519305	0.471138	0.507201	X
Clic4	0.442193	0.0376482	0.187948	0.837641	0.360072	0.402494	X
Abi3	0.274118	0.0374511	0.226439	0.08952	0.764788	0.774259	X
Ypel3	1.35828	0.0369736	0.103096	0.445131	0.504656	0.536223	X
Hacd4	0.860839	0.0365869	0.126388	0.158949	0.690126	0.705914	X
Lilra5	0.490829	0.0362555	0.199449	0.198773	0.655713	0.675865	X
Ndufb10	0.916771	0.035774	0.105063	1.50159	0.220427	0.264028	X
Anxa4	0.341328	0.0348127	0.170058	0.499679	0.479641	0.513817	X
Rap2b	0.481342	0.0346671	0.150536	0.0993602	0.752599	0.7631	X
Cox7a2l	1.24883	0.0345	0.0966905	0.301564	0.582904	0.607037	X
Stat1	0.876458	0.033475	0.184888	4.27785	0.0386121	0.0678064	X
Sdf4	0.911748	0.0328672	0.101865	2.28062	0.131	0.176829	X
Ifitm3	5.81503	0.0319406	0.100803	0.386746	0.534015	0.562392	X
Cox6c	2.11412	0.0310216	0.0733579	1.91499	0.16641	0.213815	X
Rps8	14.674	0.0301971	0.0520253	3.19863	0.0736999	0.112592	X
Tmed10	1.39784	0.0301637	0.0816674	4.68804	0.0303733	0.0556418	X
Ndufa8	0.483569	0.029928	0.137662	0.068419	0.793653	0.801001	X
Atp6v1e1	0.570463	0.0290055	0.133113	0.926704	0.335721	0.379536	X
Gltp	1.18246	0.028572	0.0940512	0.410017	0.521961	0.551474	X
Rpl21	11.2602	0.0270198	0.0527609	2.2273	0.135591	0.181528	X
Cd93	0.576411	0.0262411	0.178412	0.0562315	0.812555	0.818815	X
Lamtor1	0.997651	0.0261948	0.101831	2.63664	0.104424	0.149112	X
Mlf2	0.765144	0.0260387	0.109071	0.665095	0.414767	0.453229	X
Swi5	0.879808	0.0255894	0.104613	3.5674	0.0589245	0.0941066	X
Hcls1	1.11375	0.0255388	0.0922618	0.158752	0.690308	0.705914	X
Prr13	0.775452	0.0254973	0.111586	2.07857	0.14938	0.195584	X
Tmem106a	1.07569	0.0247252	0.117034	2.49146	0.114465	0.159277	X
Usf2	0.68359	0.0241647	0.124529	3.62788	0.0568192	0.0914139	X
Ifi27	0.646994	0.0241332	0.149771	3.17685	0.0746888	0.113729	X
Rps4x	13.6747	0.0225859	0.0577837	2.43898	0.118353	0.162902	X
Hexa	2.27583	0.022113	0.0836148	0.128954	0.719519	0.731828	X
Pgd	0.553508	0.0220769	0.140026	0.974811	0.323483	0.367288	X
Mpeg1	1.74797	0.0220231	0.115221	0.0448532	0.832274	0.837396	X
Gusb	1.02013	0.0209402	0.106455	3.88456	0.0487322	0.0819302	X
Rps3a1	11.6409	0.0200846	0.0521141	0.268845	0.604108	0.628118	X
Uqcrb	1.41934	0.0192924	0.080364	0.506892	0.476488	0.511696	X
Uqcrc1	0.586782	0.0189205	0.120666	2.08312	0.148936	0.195584	X
Ppt1	0.689828	0.018802	0.12596	1.47533	0.224506	0.268423	X
Mrpl23	0.8822	0.0172946	0.115012	1.18535	0.27627	0.320695	X
Pold4	0.506475	0.0170743	0.163748	0.130612	0.717798	0.730646	X
Anp32a	1.09843	0.0164004	0.0909313	0.0354391	0.850679	0.854599	X
Snrpg	0.759994	0.0157615	0.11426	0.869076	0.351211	0.395339	X
Pla2g7	1.43414	0.0155052	0.134972	1.21432	0.270479	0.315037	X
Sap18	0.649176	0.0144584	0.113129	1.46005	0.226922	0.271062	X
Serf2	5.95271	0.0139448	0.049813	2.48473	0.114956	0.159459	X
Pde4b	0.449905	0.0133254	0.210127	2.76876	0.0961206	0.138924	X
Gmfg	1.42411	0.0132512	0.0976436	0.856989	0.354583	0.398449	X
Gbp2	0.294363	0.0131641	0.381823	0.131074	0.717321	0.730646	X
Eef2	4.31059	0.0121045	0.0701243	3.7014	0.0543669	0.0889703	X
Eif4ebp1	0.518431	0.0118099	0.12734	3.60662	0.0575499	0.092249	X
Npc2	4.8502	0.0109702	0.0582185	2.04013	0.153196	0.199582	X
Cd53	1.03891	0.0108818	0.0949567	1.02815	0.310594	0.3545	X
Nfic	0.584469	0.00949612	0.14008	0.0945412	0.758481	0.768469	X
Ptp4a2	1.0258	0.0086422	0.0985711	0.569033	0.450644	0.48674	X
Slc15a3	0.248996	0.00813865	0.238962	1.28998	0.256053	0.299836	X
Ifngr2	0.897672	0.00749524	0.108319	0.326901	0.56749	0.593347	X
Stard3nl	0.7665	0.00719134	0.118689	3.4219	0.064337	0.101145	X
Abracl	0.569956	0.006589	0.125658	1.78223	0.181875	0.227867	X
Ear2	0.118087	0.00653161	0.774284	0.0298398	0.862854	0.866165	X
Rps2	8.48828	0.00648477	0.058084	3.79205	0.0514965	0.0850473	X
Ran	0.862169	0.00630704	0.109741	4.70184	0.0301303	0.0554296	X
Zfp706	1.0257	0.00623634	0.104676	3.54426	0.0597518	0.0947337	X
Tyrobp	14.033	0.00605444	0.042225	3.55532	0.0593549	0.0945629	X
Kdelr1	0.628411	0.00604331	0.128221	0.331215	0.564945	0.591631	X
Ndufc2	1.14715	0.00596473	0.0918338	1.56058	0.21158	0.256247	X
Jak1	0.703861	0.00586144	0.127376	2.12887	0.144547	0.190978	X
Psmb2	0.747769	0.00576259	0.104523	2.68551	0.101265	0.145486	X
Crlf2	0.666268	0.00542446	0.12038	1.73633	0.187605	0.233702	X
Plxdc2	0.277186	0.00516167	0.294092	0.852171	0.355939	0.399287	X
Ndufb9	0.837543	0.00410517	0.104924	0.544675	0.460502	0.496977	X
Nt5c	0.391917	0.0031264	0.154658	0.0791428	0.778462	0.786322	X
Lgals9	0.813512	0.00218175	0.124138	3.83715	0.0501287	0.0833945	X
Slc25a3	1.87625	0.00188872	0.0717457	0.0377662	0.845913	0.850465	X
Sept7	0.76935	0.00150019	0.117322	1.89647	0.168474	0.214779	X
Ctsc	5.70386	0.000556854	0.0633927	3.82149	0.0505992	0.083777	X
Grn	5.76611	0.000165438	0.0685293	2.89514	0.088847	0.130429	X
Psma3	0.859516	-0.000247165	0.104578	0.219988	0.639049	0.66025	X
Atp5g2	2.58964	-0.000254976	0.0664132	0.333212	0.563774	0.590878	X
Cfb	0.0537315	-0.000744293	0.665913	0.51032	0.475	0.510518	X
Rtraf	0.83648	-0.000834882	0.102307	0.492545	0.482794	0.516349	X
Tgfbi	2.27562	-0.00118326	0.0925199	3.69058	0.0547206	0.0893565	X
Uqcc2	0.598671	-0.00255552	0.132675	0.0147729	0.90326	0.90326	X
Arf4	0.623474	-0.00274986	0.133143	4.78005	0.0287913	0.0533687	X
Naca	3.42069	-0.00391118	0.0648699	0.158218	0.690802	0.705914	X
Atp5e	3.46273	-0.00485598	0.0656955	4.88833	0.0270389	0.0508876	X
Dazap2	1.54749	-0.00553418	0.0774641	2.11944	0.14544	0.191576	X
S100a13	0.644072	-0.0064175	0.116335	0.83994	0.359414	0.40215	X
Bzw1	0.663869	-0.00732779	0.123008	1.71618	0.190185	0.236241	X
Cfp	1.62282	-0.00755447	0.143774	0.0462388	0.829742	0.835491	X
Ccr2	1.97936	-0.00760181	0.176408	0.184942	0.66716	0.686582	X
Cybb	2.11441	-0.0076827	0.0929493	0.0250772	0.874175	0.875514	X
Map1lc3b	0.697321	-0.00771731	0.11616	0.0277982	0.867584	0.869804	X
Scaf11	0.531596	-0.00821083	0.147337	3.0775	0.0793823	0.119475	X
Selenok	1.23713	-0.00891337	0.0881608	0.746448	0.387603	0.427475	X
Sp140	0.389832	-0.00912849	0.166902	0.226424	0.634188	0.655746	X
Atp5j2	2.1795	-0.00961598	0.0666721	2.53102	0.111628	0.156662	X
Pitpna	0.656439	-0.00976044	0.127492	0.027703	0.867809	0.869804	X
Cox4i1	3.43198	-0.00988594	0.0564454	1.545	0.213876	0.257834	X
Clta	5.15055	-0.0106384	0.0679319	2.5437	0.110735	0.155743	X
Rab3il1	0.837543	-0.0111372	0.115012	0.169185	0.680837	0.699007	X
Pkm	1.27661	-0.0116976	0.091043	0.0183529	0.892238	0.892921	X
Ehd1	0.53107	-0.0117336	0.174019	2.79087	0.0948027	0.137474	X
Tor3a	0.316209	-0.0121994	0.195522	3.43988	0.0636402	0.10017	X
Gabarap	3.6187	-0.0127165	0.0582803	3.85084	0.0497212	0.0830592	X
Rps17	2.39251	-0.013196	0.0659308	0.083305	0.772868	0.781834	X
Clec12a	1.2484	-0.0139175	0.107691	1.87172	0.171279	0.217086	X
Pdcd2l	0.395893	-0.0140552	0.169416	0.380038	0.537583	0.565694	X
Ostf1	1.2321	-0.0143296	0.0841558	0.51499	0.472987	0.508772	X
Cox7a2	1.17742	-0.0145754	0.086369	0.320719	0.571176	0.596724	X
Ntpcr	1.13759	-0.0147542	0.117643	1.01668	0.313309	0.356665	X
Capzb	2.15881	-0.0150135	0.0665622	0.41091	0.521508	0.551474	X
Rpl30	11.3241	-0.015039	0.0537154	2.58222	0.10807	0.153148	X
Tmed9	0.80976	-0.0165854	0.104553	4.67397	0.030623	0.0559427	X
Ptpn18	3.11399	-0.01744	0.0658322	0.125422	0.723227	0.735028	X
Eif3h	1.30733	-0.0177786	0.0889121	4.26838	0.038828	0.0678064	X
Actr3	2.85456	-0.0178226	0.0724158	2.18992	0.138916	0.185329	X
Peli1	0.412752	-0.017959	0.177677	3.76201	0.0524296	0.0864791	X
Pld4	3.06084	-0.0180317	0.0706828	2.52295	0.112201	0.157297	X
Gm21188	0.774803	-0.0181358	0.161297	0.728635	0.393326	0.432596	X
Apbb1ip	0.968346	-0.0181613	0.113891	4.18345	0.0408204	0.0709072	X
Selenof	1.61873	-0.0182601	0.081073	0.0638048	0.80058	0.80737	X
Emb	0.477323	-0.0183962	0.196588	3.8426	0.0499661	0.0833541	X
Arf5	1.32665	-0.0190517	0.0823434	2.30682	0.128808	0.174591	X
C1qa	27.061	-0.0198472	0.062887	1.64798	0.199235	0.244235	X
Ncf2	0.851718	-0.0198886	0.113036	1.64379	0.199806	0.244249	X
Hpgd	3.45933	-0.0202296	0.102628	0.779627	0.377255	0.418178	X
Spcs2	0.852863	-0.020276	0.105868	0.422831	0.515528	0.546886	X
Arrb2	1.46943	-0.0203722	0.0881026	1.27064	0.259647	0.303773	X
Epsti1	0.915409	-0.0208374	0.112629	0.159761	0.689376	0.705914	X
Calm1	4.19119	-0.0226256	0.0604256	4.35254	0.0369537	0.0654066	X
Rpl31	2.23635	-0.0226269	0.0765904	0.818663	0.365571	0.407297	X
Rps28	9.2379	-0.0229248	0.0557506	0.346552	0.556072	0.583741	X
Nfkbiz	0.256781	-0.0236755	0.322672	3.99677	0.0455877	0.0776415	X
Eef1d	1.26123	-0.0249909	0.0875008	0.199402	0.655204	0.675865	X
App	1.69145	-0.0255627	0.099659	3.39113	0.0655479	0.102802	X
Eef1a1	22.4708	-0.0256718	0.0536263	4.78425	0.0287211	0.0533687	X
Cnbp	1.19695	-0.0260776	0.0876238	0.453444	0.500704	0.532889	X
Bcl3	0.22274	-0.0274925	0.240003	0.106964	0.743628	0.754589	X
Ptgds	0.553146	-0.0276337	0.495709	0.421938	0.515972	0.546913	X
Znfx1	0.374064	-0.0286822	0.178711	0.181784	0.669845	0.688262	X
Uqcrq	1.12542	-0.0290625	0.0925348	1.44235	0.229759	0.273453	X
Anp32b	0.894216	-0.030084	0.108891	0.159135	0.689954	0.705914	X
Rps7	7.89623	-0.030621	0.0625682	4.85809	0.0275167	0.0516383	X
Psme1	1.84684	-0.0311387	0.07821	4.0489	0.0442	0.0759641	X
Rps15	2.72237	-0.0311875	0.0708521	2.92818	0.0870457	0.128216	X
Akr1b3	0.818462	-0.0316278	0.102921	1.86383	0.172184	0.2176	X
Stmn1	0.171963	-0.0323466	0.417796	0.727885	0.39357	0.432596	X
H2afz	2.37341	-0.0327111	0.0843813	4.01949	0.0449774	0.0769026	X
Ap2m1	1.30505	-0.0330478	0.0922766	0.271032	0.60264	0.627091	X
Rpl13	13.873	-0.0336875	0.0524908	2.25642	0.133062	0.178874	X
Rps24	20.0342	-0.0337741	0.0540175	1.05095	0.305288	0.349359	X
Pdia4	0.554753	-0.0339302	0.142031	0.353731	0.552009	0.580175	X
Rtcb	0.565308	-0.0342269	0.136498	0.0791098	0.778507	0.786322	X
Rab1a	0.562681	-0.0343263	0.129695	0.141783	0.706514	0.720281	X
Fcgr1	1.3392	-0.0345767	0.109813	4.69704	0.0302146	0.0554839	X
Lpcat2	0.904798	-0.0357801	0.125566	2.55222	0.110139	0.15524	X
Bola2	0.540561	-0.0361141	0.137723	0.192606	0.660757	0.680528	X
Lamtor2	0.960574	-0.037486	0.0987674	0.150873	0.697702	0.712408	X
Oaz1	4.66413	-0.0375196	0.0514061	0.826088	0.363406	0.405576	X
Ctsl	0.988929	-0.0377104	0.133118	1.04021	0.307772	0.351894	X
Apoe	81.8813	-0.0377961	0.0910805	0.183476	0.668402	0.68732	X
Cd164	0.488964	-0.0382402	0.161932	0.166158	0.683549	0.701241	X
Vps29	0.54118	-0.0384393	0.129133	1.16963	0.279478	0.323216	X
Rpl28	8.871	-0.0397416	0.0565679	2.62286	0.105334	0.149921	X
Tbca	1.02229	-0.0401492	0.0949648	1.17572	0.278228	0.322341	X
Vasp	0.452557	-0.040535	0.149678	1.50855	0.21936	0.262991	X
Ifi27l2a	5.37334	-0.0406884	0.102029	2.2074	0.13735	0.183508	X
Hprt	1.24092	-0.0410633	0.0923541	0.527768	0.467547	0.503749	X
Olfml3	0.513571	-0.0421975	0.245851	1.6683	0.196486	0.241773	X
Cap1	0.953657	-0.0423056	0.100199	3.22649	0.072456	0.111235	X
Arpp19	0.720665	-0.0433824	0.110598	0.353335	0.552231	0.580175	X
Rpl36a	4.00919	-0.0435962	0.0692559	0.390778	0.531891	0.560607	X
Rps20	11.9859	-0.0451525	0.0572123	0.988971	0.319994	0.363958	X
Rpl8	6.5579	-0.0458435	0.0559391	4.84212	0.0277728	0.0520183	X
Ang	0.575525	-0.0462153	0.163336	0.505705	0.477004	0.51183	X
Itm2c	1.36241	-0.0468459	0.0845278	1.52591	0.216728	0.260312	X
Psmb9	0.985769	-0.0471179	0.109725	2.76946	0.0960786	0.138924	X
Lamtor4	1.1182	-0.0473276	0.0940376	0.601239	0.438106	0.474373	X
Psmb3	0.868857	-0.04799	0.0978995	0.755556	0.384723	0.425015	X
Ranbp1	0.433412	-0.0508049	0.148364	4.64723	0.0311037	0.056532	X
Elob	1.9166	-0.0511608	0.0713804	4.23962	0.039491	0.0688722	X
Aprt	0.438271	-0.052221	0.154782	0.419611	0.517131	0.547699	X
Rpl22	5.83773	-0.0532717	0.060446	2.07455	0.149774	0.195904	X
Pirb	0.624051	-0.0534519	0.14813	0.146164	0.702229	0.71647	X
Capza2	2.12298	-0.0539733	0.0705543	0.661785	0.41593	0.453742	X
Rbx1	1.05125	-0.0540929	0.0933288	1.32263	0.25012	0.294206	X
Gpr34	0.66017	-0.0544396	0.15296	3.20923	0.0732237	0.112151	X
Ppp1cc	0.478555	-0.0549964	0.150549	0.591208	0.441952	0.478142	X
Igfbp4	3.53844	-0.0554541	0.128857	3.21198	0.0731012	0.112094	X
Rpl35	8.2067	-0.0560476	0.0563035	2.51709	0.112618	0.157545	X
D8Ertd738e	1.34297	-0.0570146	0.08494	1.66377	0.197095	0.242066	X
Wfdc17	3.07552	-0.0570188	0.14376	0.204357	0.651227	0.672301	X
Fam26f	0.208426	-0.0573925	0.308585	3.14318	0.0762452	0.115695	X
Rpl41	17.5491	-0.0582448	0.0492297	1.88614	0.169638	0.215825	X
Uqcr10	0.968249	-0.059025	0.0991016	0.66851	0.413572	0.452301	X
Bri3	1.394	-0.0591622	0.103941	2.18903	0.138997	0.185329	X
Rogdi	0.400902	-0.059773	0.163645	2.6286	0.104954	0.149593	X
Tomm7	1.62681	-0.0600019	0.0814104	4.56854	0.0325643	0.0588317	X
Ndufb5	0.618379	-0.0605058	0.118756	0.303632	0.581614	0.606176	X
Gm36161	0.599544	-0.0605614	0.170175	1.91305	0.166625	0.213882	X
Ndufa2	1.45373	-0.0610364	0.0829281	4.89606	0.026918	0.0507331	X
Pmepa1	0.383583	-0.0618759	0.274182	2.01843	0.1554	0.202252	X
Rabac1	1.0697	-0.0622514	0.097876	1.2265	0.268088	0.312531	X
Esd	0.629618	-0.062477	0.116136	4.42635	0.0353882	0.063171	X
Cox14	0.547687	-0.0626667	0.122697	2.22433	0.135851	0.181691	X
Bst2	3.47274	-0.0627358	0.0940196	0.459611	0.497806	0.530236	X
Atp5h	1.70673	-0.0629651	0.074641	1.55073	0.213028	0.257048	X
Rpl35a	15.185	-0.0630098	0.0522351	3.04474	0.080999	0.120865	X
Hsp90b1	2.99672	-0.0630569	0.0804717	3.68766	0.0548166	0.0894017	X
Aup1	0.985268	-0.0653222	0.0937615	0.489904	0.48397	0.517184	X
Ccdc12	0.805161	-0.065989	0.115475	1.86425	0.172135	0.2176	X
Iqgap1	1.08077	-0.0671605	0.112556	4.64641	0.0311185	0.056532	X
Rplp2	7.46715	-0.067435	0.0545775	2.52013	0.112401	0.15741	X
Akr1a1	2.49511	-0.0680751	0.0742576	3.57286	0.0587312	0.0939125	X
Uqcrfs1	0.569239	-0.0686073	0.131548	0.391466	0.53153	0.560607	X
Ftl1	58.4998	-0.0701197	0.0630401	1.25169	0.263229	0.307689	X
Gpsm3	0.862893	-0.0709471	0.102804	3.07577	0.079467	0.119475	X
Rab1b	0.536847	-0.0720342	0.125578	1.78332	0.181742	0.227867	X
Ddx58	0.250562	-0.0724424	0.24153	4.04077	0.0444135	0.0761375	X
Cdc37	0.831612	-0.0729761	0.10602	2.41405	0.120251	0.164699	X
Themis2	0.336179	-0.0731033	0.163645	1.05698	0.303905	0.348385	X
Rps21	10.7332	-0.0731633	0.0555165	2.05401	0.151806	0.198166	X
Sft2d1	0.982239	-0.0746251	0.0964987	0.620739	0.430773	0.467206	X
Cct2	0.504082	-0.0754691	0.131076	2.44314	0.11804	0.162835	X
Marcks	2.35642	-0.0758712	0.0839409	1.20156	0.27301	0.31742	X
Tgfb1	0.933309	-0.0767727	0.104217	0.576778	0.447578	0.483828	X
Wasf2	0.982385	-0.0770562	0.0973075	0.705409	0.400972	0.439993	X
Rgs10	3.07437	-0.0775398	0.0674099	1.52929	0.21622	0.259941	X
Atp6v1b2	0.682124	-0.0778482	0.121372	4.02116	0.0449329	0.0769026	X
Psma7	1.02564	-0.0786802	0.0959722	0.981259	0.321888	0.365795	X
Eif3k	1.37174	-0.078866	0.0856289	0.944359	0.331159	0.375263	X
Atp6v0d1	0.608524	-0.0797794	0.120048	2.78601	0.095091	0.13774	X
Mrpl52	1.14154	-0.0798656	0.095066	2.32488	0.12732	0.173473	X
S100a10	0.540874	-0.0801791	0.176022	4.65755	0.0309172	0.0563227	X
Hspa1a	0.304193	-0.0802201	0.281124	0.644783	0.421984	0.458435	X
Atp5g3	2.07354	-0.0815547	0.0759375	4.21963	0.0399589	0.069503	X
Tmem258	0.976882	-0.0815824	0.0979612	0.912595	0.339427	0.383063	X
Slc29a3	0.50358	-0.081667	0.151779	0.531419	0.466011	0.502508	X
Csnk2b	0.515243	-0.0849776	0.124953	4.11782	0.0424336	0.0735141	X
Ebf1	0.0825649	-0.0865133	0.734762	0.120835	0.728131	0.739437	X
Nsa2	1.61816	-0.0874047	0.0875564	1.56693	0.210653	0.25536	X
Ndufa13	1.58585	-0.0892095	0.0753063	1.41872	0.233615	0.277537	X
Hspa5	2.18398	-0.089558	0.0958028	3.82325	0.0505461	0.083777	X
Atp6v0e	1.27802	-0.0899734	0.0862222	2.57721	0.108413	0.153425	X
Lst1	2.79071	-0.0916146	0.0834647	1.5311	0.215948	0.259852	X
Hspd1	0.485813	-0.0920684	0.140713	0.73082	0.392618	0.432276	X
Tuba1b	1.5939	-0.0929987	0.0949912	3.09087	0.0787327	0.118643	X
Ndufa11	0.603188	-0.0931591	0.127124	1.75487	0.185266	0.231229	X
Ube2l6	0.322551	-0.0937889	0.21251	0.782385	0.376413	0.417598	X
Xbp1	0.63166	-0.0939996	0.119586	4.69533	0.0302446	0.0554839	X
Hint1	1.69439	-0.0945566	0.0755197	1.5564	0.212192	0.256514	X
Taldo1	1.05665	-0.0952203	0.0991564	3.09445	0.0785599	0.118519	X
Tapbp	0.925287	-0.0954779	0.109855	0.773587	0.37911	0.419522	X
Cdc42se1	0.560132	-0.0956368	0.13097	1.40157	0.236461	0.280154	X
Dek	0.719807	-0.0957128	0.125686	3.19707	0.0737702	0.112592	X
Sec11c	0.63461	-0.0958886	0.123621	1.53375	0.215551	0.259614	X
Cct5	0.624562	-0.0959864	0.120817	0.651624	0.419533	0.45691	X
Eif3c	0.902152	-0.0969035	0.103926	1.13611	0.286475	0.331016	X
Minos1	0.747361	-0.0971191	0.109309	2.13161	0.144289	0.190978	X
Set	0.47889	-0.0976705	0.141293	3.99743	0.0455696	0.0776415	X
Tnfaip8	0.893266	-0.0977017	0.109985	0.795899	0.372322	0.414114	X
H2afj	1.16219	-0.0996235	0.0955595	1.37071	0.241689	0.285316	X
Aif1	2.98632	-0.100566	0.0687038	2.29752	0.129581	0.175458	X
Snrpd1	0.449849	-0.10095	0.139579	1.68099	0.194793	0.240141	X
Ly6e	10.1503	-0.101062	0.0910907	1.39483	0.23759	0.281204	X
Ubc	2.51866	-0.103237	0.0717075	4.00708	0.0453097	0.0773695	X
Cope	0.717665	-0.103277	0.109735	1.69207	0.193328	0.23969	X
Tmsb10	3.68334	-0.103788	0.13714	1.51124	0.21895	0.26274	X
Pmp22	0.606247	-0.104495	0.176247	1.20687	0.271953	0.316472	X
AB124611	0.459871	-0.105547	0.141415	2.48465	0.114962	0.159459	X
Iscu	0.805838	-0.108099	0.115501	4.42003	0.0355194	0.063171	X
Atox1	2.69796	-0.108796	0.0804126	3.13879	0.0764507	0.115872	X
Creg1	1.17663	-0.108898	0.1051	3.58969	0.058139	0.0930793	X
Esyt1	0.30053	-0.109919	0.192295	0.503079	0.478151	0.51264	X
Tmem86a	0.538873	-0.110618	0.153008	4.51089	0.0336796	0.060679	X
Cox6a1	1.40715	-0.110898	0.0827693	1.99485	0.157835	0.20481	X
Cox5b	1.68994	-0.113542	0.0759251	2.23242	0.135142	0.181112	X
Tmed2	0.84003	-0.113876	0.103487	3.92149	0.0476726	0.080459	X
Anxa3	0.500535	-0.114241	0.165224	0.704079	0.401416	0.440111	X
Sec61g	1.83806	-0.116262	0.0773346	3.67868	0.0551124	0.0896605	X
Apobec1	1.01781	-0.118486	0.135586	0.775734	0.378449	0.419146	X
Cct8	0.557495	-0.118759	0.123583	0.933576	0.333935	0.377844	X
Cd209b	0.217175	-0.122441	0.572139	0.329539	0.565931	0.59219	X
Ninj1	1.62971	-0.12261	0.140421	2.57239	0.108744	0.153539	X
Gm11808	0.555631	-0.122841	0.13573	1.77031	0.183344	0.229268	X
Cst3	37.1017	-0.123047	0.0583524	4.66303	0.0308188	0.0562218	X
Plin2	0.680449	-0.12483	0.126802	1.45304	0.22804	0.27215	X
Ppp1r18	1.18649	-0.125077	0.0926274	2.87556	0.0899338	0.131434	X
Krtcap2	0.742147	-0.126628	0.107126	2.58709	0.107738	0.153009	X
Plekho2	0.40213	-0.12724	0.171286	1.73928	0.18723	0.233457	X
Nadk	0.493617	-0.128158	0.142853	0.921465	0.337091	0.380755	X
Cd163	0.948393	-0.129808	0.246994	3.06429	0.08003	0.11977	X
Atp5o.1	0.880645	-0.130659	0.109426	2.12095	0.145297	0.191576	X
Lsp1	0.960614	-0.134654	0.192395	3.56042	0.0591728	0.0943879	X
Pf4	10.3426	-0.135603	0.12798	1.13254	0.287234	0.331453	X
Psmb4	0.530075	-0.136649	0.125579	3.26086	0.0709519	0.109201	X
Capza1	0.691364	-0.13868	0.115797	1.94159	0.163496	0.210692	X
Ltc4s	1.55642	-0.139148	0.182513	1.23529	0.266381	0.310818	X
Med28	0.73601	-0.139207	0.104973	2.48599	0.114864	0.159459	X
Bmyc	0.633462	-0.14041	0.119613	2.94143	0.0863344	0.127479	X
Rgs2	0.439398	-0.143275	0.16378	0.836721	0.360336	0.402494	X
Cox5a	1.44813	-0.14391	0.0945603	2.3153	0.128107	0.174183	X
Ccnd1	1.54538	-0.147463	0.131621	2.31721	0.127949	0.174149	X
Rpl22l1	1.1011	-0.148094	0.109877	1.99261	0.158068	0.204909	X
Cstb	1.14607	-0.148544	0.105388	2.81089	0.0936266	0.13592	X
Cuta	0.707257	-0.14962	0.116871	2.68189	0.101495	0.145566	X
Limd2	1.5784	-0.150235	0.0941769	2.94022	0.0863991	0.127479	X
Twf1	0.415225	-0.154022	0.186532	4.91608	0.0266078	0.050276	X
Bnip3l	0.592471	-0.154238	0.127749	3.8906	0.0485569	0.0817406	X
Sf3b6	0.651845	-0.154599	0.117254	2.66995	0.102259	0.1465	X
Hsp90aa1	0.811484	-0.15462	0.131896	2.58482	0.107893	0.153063	X
Tmem160	0.461596	-0.155686	0.141689	1.4447	0.22938	0.273251	X
Dbi	1.32139	-0.157895	0.0887699	3.13338	0.0767043	0.116035	X
Cbr2	6.0865	-0.157948	0.152968	1.09594	0.29516	0.339252	X
Cwc15	0.596279	-0.158857	0.119961	1.90447	0.167579	0.214265	X
Rps6ka1	0.663219	-0.159744	0.129149	3.03063	0.0817063	0.121583	X
Ywhab	0.989262	-0.159937	0.0976114	3.30428	0.0690996	0.107215	X
Sod2	0.26595	-0.160295	0.19888	1.40643	0.23565	0.279447	X
Scamp2	1.29905	-0.163633	0.0943587	4.81313	0.0282437	0.0527002	X
Rps27l	1.06118	-0.165412	0.102196	3.28688	0.0698357	0.108192	X
Sf3b5	0.691562	-0.167217	0.108677	2.84515	0.0916502	0.133793	X
Tmem256	1.17469	-0.16834	0.090121	3.87208	0.0490956	0.0823296	X
Rab5c	0.74892	-0.169238	0.106308	3.91221	0.0479366	0.0808004	X
Fcgrt	2.14436	-0.171164	0.106852	4.7326	0.0295962	0.0546006	X
Ctsd	3.40792	-0.171299	0.120445	2.15147	0.142434	0.189332	X
Timm13	0.655936	-0.171976	0.117911	2.16656	0.141041	0.187672	X
Mif	0.586747	-0.174208	0.134061	1.6839	0.194407	0.240117	X
Fli1	0.526963	-0.176183	0.138346	1.81106	0.178382	0.224565	X
Sfr1	0.533706	-0.178097	0.140262	2.7298	0.0984915	0.14188	X
Higd2a	0.700178	-0.178466	0.120187	3.41671	0.0645394	0.101342	X
Cd36	0.773949	-0.180615	0.179678	2.54631	0.110552	0.155653	X
Dad1	0.850753	-0.183418	0.0991807	3.84061	0.0500252	0.0833541	X
Gpr65	0.638481	-0.18462	0.156832	1.59196	0.207046	0.251922	X
Mpc2	0.503765	-0.189085	0.127759	2.94383	0.0862061	0.127479	X
Serp1	1.19607	-0.192399	0.108213	3.72627	0.053563	0.0879051	X
Csk	0.668236	-0.194227	0.113702	3.33068	0.0679987	0.106136	X
Atp5g1	1.03842	-0.197943	0.0952805	4.62914	0.0314334	0.0570247	X
Clec4n	1.02738	-0.198456	0.191499	1.84025	0.174922	0.220634	X
Atp6v1a	0.360232	-0.201143	0.165777	2.4233	0.119543	0.164073	X
C1qbp	0.381518	-0.204793	0.153924	3.64165	0.0563511	0.0909716	X
Gbp3	0.184578	-0.208127	0.262671	2.4941	0.114273	0.15918	X
Bax	0.758449	-0.208826	0.120032	3.61573	0.0572358	0.091971	X
Raly	0.668065	-0.210245	0.11231	4.23065	0.0397001	0.0691448	X
Hmgn2	0.556492	-0.218897	0.151383	2.09558	0.147725	0.194196	X
Ncf1	0.666047	-0.224016	0.130135	3.638	0.0564747	0.0909716	X
AW112010	0.772011	-0.23581	0.178044	2.4292	0.119094	0.163629	X
Sh3bgrl	0.721265	-0.237826	0.114187	4.27496	0.0386779	0.0678064	X
Mpc1	0.497417	-0.252511	0.134753	4.72887	0.0296603	0.0546419	X
C3	0.144014	-0.254465	0.406758	0.477008	0.489781	0.522539	X
Ppig	0.434608	-0.268113	0.156603	3.06595	0.0799484	0.11977	X
Renbp	0.385458	-0.275753	0.163806	2.94997	0.0858791	0.127214	X
Slamf7	0.394122	-0.29634	0.209716	2.07967	0.149273	0.195584	X
Cd209f	1.84519	-0.296607	0.359862	0.708319	0.400002	0.439297	X
Pla2g2d	0.588787	-0.297874	0.313654	2.27332	0.131618	0.177298	X
Vcam1	0.428046	-0.301464	0.292839	3.27281	0.0704368	0.108902	X
Arsb	0.243426	-0.321199	0.235064	1.9045	0.167575	0.214265	X
Malat1	60.5455	-0.328081	0.156631	4.73952	0.0294773	0.0545149	X
Cited2	0.336967	-0.342339	0.20049	3.12013	0.0773306	0.1168	X
Fgl2	0.421319	-0.343487	0.226382	2.36417	0.12415	0.169684	X
Itgax	0.127853	-0.356052	0.397366	0.873306	0.350042	0.394362	X
Cd209a	0.323968	-0.356423	0.507644	1.10103			X
Cxcl9	0.466144	-0.381703	0.828784	0.235992			X
Ly6a	0.340483	-0.389391	0.457076	1.00426			X
Cd209g	0.953867	-0.4768	0.381933	1.76827	0.183596	0.229364	X
Lyve1	0.202695	-0.526183	0.438255	2.23505	0.134912	0.181091	X
Ccl24	0.596564	-0.534786	0.294066	3.35519	0.0669935	0.104943	X
Slc40a1	0.411819	-0.570661	0.327685	3.53824	0.059969	0.094963	X
Ly6d	0.0428423	-0.571964	1.43046	0.249924			X
Serpina3g	0.0825307	-0.70994	0.69967	1.11953	0.29002	0.334226	X
Fcna	0.123201	-0.734982	0.539599	1.8848	0.169789	0.215825	X
AY036118	2.01378	-0.988832	0.197444	26.0877			X
Ccl5	0.404103	-1.01696	0.55881	3.47503			X
Ltb	0.0540793	-1.02743	0.815003	1.66473	0.196966	0.242066	X
Lyz1	0.170614	-1.05739	0.712808	2.85651			X
Plac8	0.152707	-1.18928	0.868221	2.09296			X
Ly6c2	0.205801	-2.00644	0.858397	6.40637			X
