# Supplementary material for: The meningeal transcriptional response to traumatic brain injury and aging
Source: eLife. 2023 Jan 3;12:e81154. doi: 10.7554/eLife.81154 (PMC9810333; doi:10.7554/eLife.81154)
Supplement: Figure 2—source data 4. [file elife-81154-fig2-data4.xlsx]

## Sheet: Sheet1
Ifnar1			Irf5			Ifnb1			Ifi203
Sham	TBI		Sham	TBI		Sham	TBI		Sham	TBI
1.07509	1.8113		0.72406	1.83963		0.825431	2.2786		1.07305	2.26116
0.942014	1.40399		0.980266	1.31528		0.836579	2.97684		1.03415	1.67039
1.05841	1.68409		1.48416	1.54768		0.756179	1.37916		1.05835	2.12407
0.866159	1.86912		0.93927	1.4389		1.06109	2.30174		0.955059	1.66196
1.05834	1.56357		0.872249	1.47828		1.52072	0.931716		0.879387	1.54999
