# Supplementary material for: The meningeal transcriptional response to traumatic brain injury and aging
Source: eLife. 2023 Jan 3;12:e81154. doi: 10.7554/eLife.81154 (PMC9810333; doi:10.7554/eLife.81154)
Supplement: Figure 2—source data 5. — Tables depicting the top 10 most significant cluster-defining genes for macrophage populations. Raw data for top cluster defining genes for each cell population. [file elife-81154-fig2-data5.xlsx]

## Sheet: Sheet1
	p_val	avg_log2FC	pct.1	pct.2	p_val_adj	cluster	gene		Ferritin Expressing			Anti-Inflammatory			Resolution Phase			Inflammatory 1			Inflammatory 2
Ftl1	1.32073e-92	1.29086	1	0.94	2.2846e-88	0	Ftl1		Gene	P_adj		Gene	P_adj		Gene	P_adj		Gene	P_adj		Gene	P_adj
Fth1	2.25994e-57	0.837287	0.998	0.949	3.90925e-53	0	Fth1		Ftl1	2.28e-88		Mrc1	3.93e-58		F11r	3.81e-71		Napsa	2.45e-60		Ccr7	2.23e-235
Pf4	2.55266e-42	1.33447	0.828	0.607	4.41559e-38	0	Pf4		Fth1	3.91e-53		C5ar1	9.21e-56		Olfml3	1.73e-67		S100a6	4.68e-57		Cacnb3	7.88e-201
Rps29	5.19224e-39	0.94056	0.949	0.885	8.98154e-35	0	Rps29		Pf4	4.42e-38		Stab1	3.55e-51		Ctss	1.81e-66		Capg	4.86e-46		Nudt17	2.44e-164
Ccl8	2.12288e-38	3.21004	0.429	0.135	3.67215e-34	0	Ccl8		Rps29	8.98e-35		Nrros	3.14e-46		Hexb	8.61e-59		S100a4	2.96e-45		Socs2	2.16e-159
Selenop	3.09953e-38	1.10197	0.915	0.81	5.36157e-34	0	Selenop		Ccl8	3.67e-34		Pmp22	9.12e-45		Tgfbr1	8.97e-56		Lgals3	8.75e-39		Spint2	7.69e-148
Rplp1	1.74707e-36	0.869674	0.954	0.886	3.02208e-32	0	Rplp1		Selenop	5.36e-34		Slc9a9	6.64e-44		Slamf9	7.6e-48		Fgr	9.46e-39		Mreg	2.6e-137
Cbr2	1.47009e-33	1.32809	0.729	0.464	2.54295e-29	0	Cbr2		Rplp1	3.02e-32		Fcrls	1.59e-42		Psap	2.32e-44		Vim	2.93e-34		Slco5a1	1.21e-128
Tyrobp	1.02413e-28	0.646541	0.947	0.859	1.77155e-24	0	Tyrobp		Cbr2	2.54e-29		Maf	2.14e-42		Mafb	1.25e-41		Tnip3	3.09e-33		Gm10851	8.54e-120
Igfbp4	7.33428e-27	1.34762	0.676	0.558	1.26868e-22	0	Igfbp4		Tyrobp	1.77e-24		Dab2	3.78e-42		H2-Eb1	1.35e-41		Ccr2	2.56e-32		Apol7c	8.22e-118
Tmsb4x	8.33401e-27	0.501031	0.99	0.948	1.44162e-22	0	Tmsb4x		Igfbp4	1.27e-22		Rab11fip5	1.18e-41		Lair1	4.44e-41		Alcam	2.63e-30		Serpinb6b	4.47e-113
Rpl41	1.16026e-25	0.617502	0.966	0.923	2.00702e-21	0	Rpl41		*Each graph depicts top 10 cluster-defining genes
Cox8a	4.85224e-22	0.906173	0.772	0.805	8.39341e-18	0	Cox8a
Cd209f	1.03257e-21	1.67963	0.31	0.102	1.78614e-17	0	Cd209f
Gng5	6.49602e-21	0.978332	0.746	0.815	1.12368e-16	0	Gng5
Fau	4.29951e-19	0.546767	0.976	0.91	7.4373e-15	0	Fau
Clta	4.33314e-18	0.91043	0.76	0.838	7.49546e-14	0	Clta
Rps24	4.8271e-17	0.541377	0.964	0.921	8.34992e-13	0	Rps24
Fcer1g	5.56066e-17	0.548087	0.944	0.889	9.61884e-13	0	Fcer1g
Rpl35a	8.08441e-17	0.534866	0.937	0.893	1.39844e-12	0	Rpl35a
Cst3	9.7063e-17	0.473559	0.981	0.948	1.67899e-12	0	Cst3
Gm42418	1.95888e-16	0.611493	0.998	1	3.38847e-12	0	Gm42418
Rps3a1	4.28722e-16	0.591442	0.932	0.874	7.41604e-12	0	Rps3a1
Rpl30	4.95649e-16	0.554808	0.913	0.863	8.57373e-12	0	Rpl30
Rpl37	1.2255e-15	0.544349	0.923	0.891	2.11987e-11	0	Rpl37
Ppia	8.93975e-15	0.521945	0.915	0.889	1.5464e-10	0	Ppia
Gabarap	9.22094e-15	0.75526	0.707	0.802	1.59504e-10	0	Gabarap
Serf2	1.3358e-14	0.666019	0.809	0.86	2.31067e-10	0	Serf2
Hbb-bs	3.15772e-14	1.22076	0.535	0.448	5.46222e-10	0	Hbb-bs
Tomm20	3.37971e-14	0.266333	0.16	0.443	5.84623e-10	0	Tomm20
Rps28	5.00472e-14	0.60662	0.879	0.866	8.65717e-10	0	Rps28
Rpl38	9.29162e-14	0.500291	0.877	0.87	1.60726e-09	0	Rpl38
Rps21	9.95222e-14	0.576832	0.879	0.887	1.72153e-09	0	Rps21
Cuedc2	3.66082e-13	0.300467	0.174	0.457	6.33249e-09	0	Cuedc2
Ly6e	6.85471e-13	0.753743	0.797	0.799	1.18573e-08	0	Ly6e
Snu13	7.65855e-13	0.371039	0.196	0.499	1.32478e-08	0	Snu13
S100a13	1.39252e-12	0.318854	0.203	0.507	2.40879e-08	0	S100a13
Ndufa8	1.1595e-11	0.279206	0.16	0.414	2.00571e-07	0	Ndufa8
Coa3	1.29085e-11	0.333536	0.189	0.474	2.23291e-07	0	Coa3
F13a1	1.4199e-11	0.835617	0.613	0.521	2.45615e-07	0	F13a1
Rps20	2.09111e-11	0.528431	0.91	0.885	3.61721e-07	0	Rps20
Cmpk1	2.36153e-11	0.288134	0.184	0.451	4.08498e-07	0	Cmpk1
Banf1	2.4518e-11	0.301055	0.189	0.463	4.24113e-07	0	Banf1
Rpl21	2.73794e-11	0.46713	0.908	0.874	4.73608e-07	0	Rpl21
Psma2	3.76046e-11	0.33781	0.245	0.566	6.50485e-07	0	Psma2
Vkorc1	4.14866e-11	0.292255	0.186	0.456	7.17635e-07	0	Vkorc1
Gas6	5.09307e-11	1.03218	0.547	0.47	8.81e-07	0	Gas6
Blvrb	5.28414e-11	1.08958	0.593	0.623	9.14051e-07	0	Blvrb
Rpl23	5.53036e-11	0.452532	0.93	0.884	9.56642e-07	0	Rpl23
Leprot	5.54911e-11	0.297385	0.184	0.444	9.59885e-07	0	Leprot
Cct5	5.78679e-11	0.289108	0.199	0.474	1.001e-06	0	Cct5
Ahsa1	5.83612e-11	0.326093	0.162	0.41	1.00953e-06	0	Ahsa1
Rpl35	6.26047e-11	0.50086	0.864	0.86	1.08294e-06	0	Rpl35
Oat	7.05789e-11	0.281724	0.133	0.354	1.22087e-06	0	Oat
Fam96a	7.67931e-11	0.347229	0.169	0.423	1.32837e-06	0	Fam96a
Mrpl20	7.95057e-11	0.255877	0.133	0.352	1.37529e-06	0	Mrpl20
Usf2	8.11493e-11	0.2808	0.208	0.493	1.40372e-06	0	Usf2
Chmp2a	8.43028e-11	0.275955	0.22	0.512	1.45827e-06	0	Chmp2a
Ier3ip1	8.70127e-11	0.27989	0.165	0.409	1.50515e-06	0	Ier3ip1
Metap2	9.6063e-11	0.327153	0.215	0.506	1.6617e-06	0	Metap2
Rps8	1.03465e-10	0.439186	0.937	0.904	1.78973e-06	0	Rps8
Top1	1.36772e-10	0.319149	0.218	0.502	2.36588e-06	0	Top1
Dnajc15	1.55022e-10	0.276049	0.136	0.354	2.68157e-06	0	Dnajc15
Ufc1	1.63458e-10	0.252022	0.179	0.432	2.82749e-06	0	Ufc1
Pet100	2.0964e-10	0.287803	0.148	0.372	3.62635e-06	0	Pet100
Rps4x	2.29355e-10	0.488415	0.903	0.871	3.96739e-06	0	Rps4x
Aurkaip1	2.51684e-10	0.335495	0.16	0.398	4.35364e-06	0	Aurkaip1
Psmc5	2.78298e-10	0.374512	0.148	0.376	4.814e-06	0	Psmc5
Paics	2.85876e-10	0.284927	0.145	0.365	4.94508e-06	0	Paics
Dynlrb1	3.09872e-10	0.289028	0.203	0.477	5.36016e-06	0	Dynlrb1
Krtcap2	3.66131e-10	0.334853	0.242	0.55	6.33333e-06	0	Krtcap2
Fam103a1	4.36278e-10	0.306623	0.133	0.346	7.54674e-06	0	Fam103a1
Tpt1	4.7181e-10	0.473594	0.937	0.899	8.16137e-06	0	Tpt1
Gpsm3	4.76996e-10	0.374039	0.252	0.57	8.25108e-06	0	Gpsm3
Ube2l3	4.79878e-10	0.283663	0.184	0.434	8.30094e-06	0	Ube2l3
1110008F13Rik	4.98106e-10	0.292925	0.223	0.507	8.61624e-06	0	1110008F13Rik
Vti1b	5.29211e-10	0.291893	0.177	0.418	9.15429e-06	0	Vti1b
Gnpda1	5.7086e-10	0.338499	0.14	0.351	9.87474e-06	0	Gnpda1
Map1lc3b	6.71891e-10	0.260248	0.225	0.511	1.16224e-05	0	Map1lc3b
Esd	6.94593e-10	0.264577	0.23	0.517	1.20151e-05	0	Esd
Hspa9	7.61904e-10	0.302128	0.116	0.307	1.31794e-05	0	Hspa9
Rpl34	8.80517e-10	0.45064	0.893	0.867	1.52312e-05	0	Rpl34
Mpc2	1.00892e-09	0.37476	0.182	0.43	1.74523e-05	0	Mpc2
Rpl11	1.01655e-09	0.415331	0.884	0.878	1.75843e-05	0	Rpl11
1810058I24Rik	1.23238e-09	0.390385	0.191	0.442	2.13177e-05	0	1810058I24Rik
Cwc15	1.25047e-09	0.320877	0.208	0.474	2.16306e-05	0	Cwc15
Llph	1.2677e-09	0.358551	0.186	0.434	2.19287e-05	0	Llph
Prdx1	1.29835e-09	0.842254	0.683	0.809	2.24589e-05	0	Prdx1
Dad1	1.39495e-09	0.349068	0.264	0.588	2.41298e-05	0	Dad1
Txn1	1.48566e-09	0.300968	0.22	0.494	2.56989e-05	0	Txn1
Samm50	1.5111e-09	0.275225	0.111	0.296	2.6139e-05	0	Samm50
Ndufb4	1.72893e-09	0.341832	0.264	0.579	2.9907e-05	0	Ndufb4
Tpr	1.83048e-09	0.301873	0.315	0.649	3.16636e-05	0	Tpr
Lamtor5	1.88334e-09	0.308244	0.15	0.361	3.25781e-05	0	Lamtor5
Psmb3	1.89978e-09	0.318853	0.274	0.594	3.28624e-05	0	Psmb3
Bag1	2.02675e-09	0.285181	0.155	0.372	3.50587e-05	0	Bag1
Mea1	2.11852e-09	0.338993	0.133	0.336	3.66461e-05	0	Mea1
Bola2	2.33672e-09	0.268609	0.179	0.414	4.04205e-05	0	Bola2
Ssrp1	2.4248e-09	0.278122	0.128	0.323	4.19441e-05	0	Ssrp1
Igf1	2.86776e-09	1.08375	0.467	0.393	4.96066e-05	0	Igf1
Ndufa12	2.91692e-09	0.377472	0.148	0.359	5.04569e-05	0	Ndufa12
Hsd17b10	3.27651e-09	0.30738	0.092	0.258	5.66771e-05	0	Hsd17b10
Rrp1	3.52782e-09	0.341281	0.179	0.417	6.10243e-05	0	Rrp1
Snap23	3.65802e-09	0.323925	0.184	0.417	6.32765e-05	0	Snap23
Rer1	3.75443e-09	0.403246	0.232	0.512	6.49441e-05	0	Rer1
Cfdp1	3.89029e-09	0.314428	0.131	0.327	6.72942e-05	0	Cfdp1
Prkar1a	4.267e-09	0.40716	0.247	0.541	7.38107e-05	0	Prkar1a
Rab11a	4.45425e-09	0.306798	0.23	0.504	7.70496e-05	0	Rab11a
Fundc2	4.59283e-09	0.270687	0.136	0.333	7.94467e-05	0	Fundc2
Rps12	4.84592e-09	0.521484	0.843	0.846	8.38247e-05	0	Rps12
Ghitm	5.43944e-09	0.30018	0.196	0.44	9.40914e-05	0	Ghitm
Rps11	5.69877e-09	0.449469	0.925	0.873	9.85773e-05	0	Rps11
Rpl6	6.28893e-09	0.444669	0.857	0.87	0.000108786	0	Rpl6
Pcbd2	7.49046e-09	0.251036	0.107	0.278	0.00012957	0	Pcbd2
Ndufb5	8.15973e-09	0.300581	0.218	0.485	0.000141147	0	Ndufb5
Mrps36	8.74534e-09	0.275997	0.121	0.302	0.000151277	0	Mrps36
Psmc3	8.88325e-09	0.307647	0.199	0.441	0.000153662	0	Psmc3
Apoe	9.01795e-09	0.380634	0.949	0.857	0.000155993	0	Apoe
Ggh	9.28848e-09	0.279129	0.16	0.374	0.000160672	0	Ggh
Hmox1	1.02426e-08	0.330278	0.16	0.367	0.000177177	0	Hmox1
Gnb1	1.1764e-08	0.254627	0.126	0.309	0.000203494	0	Gnb1
Chmp3	1.25844e-08	0.328579	0.157	0.367	0.000217684	0	Chmp3
Bnip3l	1.27318e-08	0.325187	0.203	0.449	0.000220234	0	Bnip3l
Trappc2l	1.3762e-08	0.262068	0.167	0.382	0.000238055	0	Trappc2l
Iscu	1.6484e-08	0.254424	0.259	0.536	0.000285141	0	Iscu
Atp5e	1.66094e-08	0.710302	0.68	0.805	0.000287309	0	Atp5e
Itm2b	1.80802e-08	0.398742	0.947	0.928	0.000312751	0	Itm2b
Rplp2	2.01282e-08	0.455579	0.85	0.86	0.000348178	0	Rplp2
St13	2.08147e-08	0.346933	0.211	0.462	0.000360053	0	St13
Cox14	2.14552e-08	0.360347	0.215	0.47	0.000371133	0	Cox14
Cndp2	2.26525e-08	0.261921	0.264	0.543	0.000391842	0	Cndp2
Polr2i	2.37368e-08	0.299669	0.119	0.295	0.0004106	0	Polr2i
Rpl13	2.50256e-08	0.400635	0.944	0.903	0.000432892	0	Rpl13
Rnf5	2.5438e-08	0.292092	0.138	0.328	0.000440026	0	Rnf5
2410015M20Rik	2.57042e-08	0.386754	0.201	0.444	0.000444631	0	2410015M20Rik
Rps2	2.7059e-08	0.428245	0.874	0.87	0.000468066	0	Rps2
Anp32b	2.73793e-08	0.365916	0.264	0.553	0.000473607	0	Anp32b
Hpgd	2.79701e-08	0.82357	0.642	0.673	0.000483827	0	Hpgd
Ndufs5	2.92953e-08	0.308205	0.203	0.443	0.00050675	0	Ndufs5
Gtf2h5	2.96431e-08	0.255921	0.153	0.348	0.000512766	0	Gtf2h5
Sec11c	3.26127e-08	0.330272	0.211	0.461	0.000564134	0	Sec11c
Ctnnb1	3.62467e-08	0.352268	0.211	0.45	0.000626996	0	Ctnnb1
Dek	4.0251e-08	0.30391	0.235	0.491	0.000696262	0	Dek
Eif3i	4.15922e-08	0.297418	0.232	0.493	0.000719461	0	Eif3i
Mrpl57	4.40007e-08	0.284273	0.131	0.312	0.000761125	0	Mrpl57
Rpl39	4.42228e-08	0.408616	0.893	0.865	0.000764965	0	Rpl39
Tmem14c	4.80584e-08	0.283088	0.276	0.573	0.000831315	0	Tmem14c
Sf3b5	4.84186e-08	0.376013	0.242	0.517	0.000837545	0	Sf3b5
Folr2	5.1686e-08	0.996877	0.351	0.241	0.000894065	0	Folr2
Pld3	5.47531e-08	0.273305	0.177	0.385	0.000947119	0	Pld3
Higd1a	5.50651e-08	0.261257	0.116	0.284	0.000952517	0	Higd1a
Oaz1	5.55508e-08	0.636197	0.722	0.846	0.000960918	0	Oaz1
Arpc1a	5.56349e-08	0.394034	0.215	0.461	0.000962373	0	Arpc1a
Phb	5.71822e-08	0.292443	0.136	0.315	0.000989137	0	Phb
Rpl36	6.11713e-08	0.488272	0.85	0.854	0.00105814	0	Rpl36
Eif2s2	6.52075e-08	0.311605	0.225	0.468	0.00112796	0	Eif2s2
Rnaseh2c	6.76061e-08	0.306147	0.145	0.332	0.00116945	0	Rnaseh2c
Ppp1r18	7.59662e-08	0.255412	0.324	0.643	0.00131406	0	Ppp1r18
Timm17b	7.59973e-08	0.252631	0.107	0.264	0.0013146	0	Timm17b
Rab5c	7.62133e-08	0.295227	0.252	0.521	0.00131834	0	Rab5c
Mrps24	8.01941e-08	0.4021	0.213	0.459	0.0013872	0	Mrps24
Rnf10	8.23535e-08	0.300667	0.148	0.333	0.00142455	0	Rnf10
Blvra	8.40829e-08	0.340717	0.165	0.366	0.00145447	0	Blvra
Cuta	8.47116e-08	0.344847	0.225	0.481	0.00146534	0	Cuta
Ninj1	1.00433e-07	1.18319	0.484	0.472	0.00173728	0	Ninj1
Gclm	1.00939e-07	0.275156	0.107	0.261	0.00174605	0	Gclm
Rabac1	1.18241e-07	0.252303	0.312	0.637	0.00204533	0	Rabac1
Denr	1.19078e-07	0.260519	0.128	0.299	0.0020598	0	Denr
Rpl22	1.29216e-07	0.525742	0.76	0.823	0.00223518	0	Rpl22
Slc25a4	1.34888e-07	0.337857	0.191	0.409	0.00233329	0	Slc25a4
Ndufs7	1.41947e-07	0.325455	0.264	0.547	0.00245539	0	Ndufs7
Rpl19	1.49628e-07	0.366974	0.91	0.867	0.00258827	0	Rpl19
Rpl9	1.5764e-07	0.358234	0.896	0.883	0.00272686	0	Rpl9
Ptp4a3	1.58669e-07	0.25625	0.107	0.258	0.00274466	0	Ptp4a3
Rtraf	1.82205e-07	0.286431	0.281	0.57	0.00315178	0	Rtraf
Acat1	1.82438e-07	0.328428	0.155	0.341	0.00315581	0	Acat1
Msrb1	1.8705e-07	0.434867	0.119	0.28	0.00323559	0	Msrb1
Sec14l1	1.89659e-07	0.270824	0.172	0.368	0.00328072	0	Sec14l1
Eif4e	1.99357e-07	0.26838	0.123	0.287	0.00344848	0	Eif4e
Ptms	1.99907e-07	0.253967	0.308	0.608	0.00345799	0	Ptms
Stub1	2.17919e-07	0.257845	0.208	0.435	0.00376956	0	Stub1
H2afj	2.23278e-07	0.370524	0.312	0.63	0.00386227	0	H2afj
Pdcd5	2.24762e-07	0.398213	0.215	0.457	0.00388793	0	Pdcd5
Dmac1	2.30226e-07	0.381794	0.203	0.429	0.00398245	0	Dmac1
Slirp	2.30417e-07	0.42497	0.136	0.312	0.00398575	0	Slirp
Fam174a	2.57919e-07	0.414653	0.259	0.531	0.00446148	0	Fam174a
Atp6v1e1	2.71452e-07	0.283257	0.208	0.435	0.00469557	0	Atp6v1e1
Nars	3.09611e-07	0.417276	0.228	0.468	0.00535565	0	Nars
Snrpd2	3.47966e-07	0.404454	0.211	0.444	0.00601911	0	Snrpd2
Adipor1	3.48382e-07	0.301548	0.274	0.556	0.00602632	0	Adipor1
Cox7b	3.52566e-07	0.355864	0.281	0.569	0.00609868	0	Cox7b
Ndufc2	3.77963e-07	0.303502	0.32	0.634	0.006538	0	Ndufc2
AI413582	3.87235e-07	0.346505	0.201	0.423	0.00669839	0	AI413582
Eps15	3.99848e-07	0.282717	0.271	0.525	0.00691657	0	Eps15
Rpl27a	4.05987e-07	0.43839	0.881	0.874	0.00702276	0	Rpl27a
Trf	4.15163e-07	0.276322	0.237	0.469	0.00718148	0	Trf
Lst1	4.47923e-07	0.779431	0.603	0.698	0.00774817	0	Lst1
Commd1	4.48461e-07	0.276754	0.138	0.309	0.00775748	0	Commd1
Mdh1	4.5416e-07	0.416527	0.271	0.551	0.00785606	0	Mdh1
Taldo1	5.16329e-07	0.258822	0.305	0.602	0.00893145	0	Taldo1
Bst2	5.55188e-07	0.680353	0.646	0.754	0.00960364	0	Bst2
Rpl28	6.01389e-07	0.442833	0.872	0.863	0.0104028	0	Rpl28
Nutf2	6.04187e-07	0.308165	0.133	0.299	0.0104512	0	Nutf2
Caprin1	6.05299e-07	0.358071	0.174	0.366	0.0104705	0	Caprin1
Smdt1	6.13891e-07	0.355076	0.322	0.642	0.0106191	0	Smdt1
Nme2	6.21143e-07	0.33857	0.262	0.523	0.0107445	0	Nme2
1810037I17Rik	6.22214e-07	0.368452	0.254	0.521	0.0107631	0	1810037I17Rik
Sumo1	6.45595e-07	0.457911	0.24	0.491	0.0111675	0	Sumo1
Rpl24	6.49355e-07	0.460507	0.797	0.836	0.0112325	0	Rpl24
Cd300ld3	7.01447e-07	0.327426	0.153	0.327	0.0121336	0	Cd300ld3
Gatm	7.66036e-07	0.251148	0.245	0.474	0.0132509	0	Gatm
Med28	8.25399e-07	0.425944	0.266	0.543	0.0142777	0	Med28
Hspe1	8.61764e-07	0.291107	0.298	0.584	0.0149068	0	Hspe1
C1d	9.24426e-07	0.299566	0.128	0.289	0.0159907	0	C1d
Ifitm3	9.32432e-07	0.592684	0.722	0.746	0.0161292	0	Ifitm3
Ndufa11	9.52561e-07	0.452932	0.218	0.449	0.0164774	0	Ndufa11
Pdrg1	9.6782e-07	0.316772	0.109	0.252	0.0167414	0	Pdrg1
Gnas	1.0712e-06	0.338594	0.31	0.608	0.0185297	0	Gnas
Ndufb6	1.16316e-06	0.461525	0.184	0.385	0.0201203	0	Ndufb6
Ccdc47	1.18618e-06	0.261782	0.131	0.284	0.0205186	0	Ccdc47
Pgk1	1.23977e-06	0.415837	0.153	0.327	0.0214456	0	Pgk1
Mrpl42	1.28337e-06	0.381573	0.22	0.448	0.0221998	0	Mrpl42
Atp6v0e	1.36046e-06	0.313993	0.354	0.679	0.0235332	0	Atp6v0e
Rpl32	1.45293e-06	0.364998	0.884	0.871	0.0251328	0	Rpl32
Zmat2	1.48375e-06	0.461257	0.15	0.321	0.0256658	0	Zmat2
Hdlbp	1.51052e-06	0.362579	0.169	0.352	0.0261289	0	Hdlbp
Ywhab	1.5564e-06	0.334614	0.295	0.583	0.0269225	0	Ywhab
Hba-a1	1.57938e-06	1.39099	0.344	0.277	0.0273201	0	Hba-a1
Rpl36al	1.66764e-06	0.376475	0.249	0.504	0.0288469	0	Rpl36al
Qdpr	1.68756e-06	0.410992	0.177	0.366	0.0291914	0	Qdpr
Idh2	1.89429e-06	0.267142	0.223	0.435	0.0327674	0	Idh2
Mpc1	1.89796e-06	0.400511	0.203	0.411	0.0328309	0	Mpc1
Dnajc19	1.89869e-06	0.367362	0.218	0.441	0.0328435	0	Dnajc19
Mlf2	2.07187e-06	0.423859	0.274	0.541	0.0358392	0	Mlf2
Rnf130	2.08895e-06	0.34614	0.22	0.441	0.0361347	0	Rnf130
Ndufb7	2.14653e-06	0.446037	0.274	0.543	0.0371307	0	Ndufb7
Sh3bgrl	2.19388e-06	0.391509	0.249	0.493	0.0379497	0	Sh3bgrl
Gm11808	2.73482e-06	0.416215	0.211	0.421	0.047307	0	Gm11808
Mrpl28	2.82742e-06	0.37409	0.155	0.322	0.0489086	0	Mrpl28
Use1	2.89586e-06	0.382024	0.169	0.35	0.0500925	0	Use1
Eef1d	3.48641e-06	0.317577	0.344	0.665	0.060308	0	Eef1d
Ehd1	3.81707e-06	0.256372	0.167	0.335	0.0660277	0	Ehd1
Ctsb	4.40443e-06	0.379051	0.835	0.897	0.0761878	0	Ctsb
Bzw1	4.50417e-06	0.399366	0.245	0.477	0.0779132	0	Bzw1
Cltb	4.81954e-06	0.301521	0.128	0.275	0.0833683	0	Cltb
Renbp	4.84602e-06	0.361926	0.153	0.315	0.0838264	0	Renbp
Ap1b1	4.86035e-06	0.252738	0.199	0.386	0.0840744	0	Ap1b1
Aif1	5.45656e-06	0.668869	0.642	0.765	0.0943876	0	Aif1
Gstp1	6.09449e-06	0.27658	0.131	0.274	0.105422	0	Gstp1
Plekhb2	6.51547e-06	0.443372	0.136	0.288	0.112705	0	Plekhb2
2610507B11Rik	6.61097e-06	0.341404	0.196	0.383	0.114357	0	2610507B11Rik
Ubb	7.39777e-06	0.401512	0.867	0.898	0.127967	0	Ubb
Wfdc17	7.78811e-06	1.30259	0.506	0.538	0.134719	0	Wfdc17
Ndufb9	7.91308e-06	0.542558	0.281	0.557	0.13688	0	Ndufb9
Rpl18a	7.98779e-06	0.331168	0.869	0.87	0.138173	0	Rpl18a
Ndufb11	8.4895e-06	0.415369	0.32	0.626	0.146851	0	Ndufb11
Ccdc124	9.19794e-06	0.429875	0.155	0.319	0.159106	0	Ccdc124
Rps3	1.04752e-05	0.353338	0.843	0.852	0.1812	0	Rps3
Pfdn5	1.11808e-05	0.730131	0.642	0.778	0.193406	0	Pfdn5
Sem1	1.128e-05	0.589706	0.637	0.781	0.195122	0	Sem1
Fkbp2	1.18607e-05	0.465577	0.228	0.44	0.205166	0	Fkbp2
Akr1b3	1.25014e-05	0.419024	0.286	0.549	0.21625	0	Akr1b3
0610012G03Rik	1.3429e-05	0.415688	0.225	0.436	0.232294	0	0610012G03Rik
Rpl8	1.38362e-05	0.416974	0.804	0.851	0.239339	0	Rpl8
Tmem258	1.4457e-05	0.385933	0.312	0.605	0.250078	0	Tmem258
Selenom	1.45031e-05	0.324875	0.131	0.269	0.250875	0	Selenom
Txndc17	1.46644e-05	0.255469	0.259	0.492	0.253664	0	Txndc17
Smim10l1	1.56009e-05	0.357745	0.145	0.294	0.269864	0	Smim10l1
Rpl36a	1.65042e-05	0.561645	0.692	0.807	0.285489	0	Rpl36a
Clec4n	1.68018e-05	1.12465	0.349	0.295	0.290638	0	Clec4n
Ndufs6	1.73316e-05	0.511091	0.162	0.326	0.299803	0	Ndufs6
Hba-a2	1.90139e-05	1.16404	0.312	0.248	0.328902	0	Hba-a2
Timm13	2.05476e-05	0.504481	0.247	0.48	0.355432	0	Timm13
Bloc1s1	2.13406e-05	0.525425	0.264	0.509	0.369149	0	Bloc1s1
Eif4g2	2.30591e-05	0.331525	0.312	0.581	0.398877	0	Eif4g2
Park7	2.34282e-05	0.481468	0.317	0.61	0.405262	0	Park7
Akr1a1	2.3497e-05	0.838588	0.596	0.761	0.406452	0	Akr1a1
Rps26	2.36121e-05	0.334977	0.872	0.859	0.408442	0	Rps26
Rps16	2.41157e-05	0.34899	0.93	0.872	0.417154	0	Rps16
Rad23b	2.45181e-05	0.522419	0.172	0.336	0.424114	0	Rad23b
Rps9	2.50835e-05	0.322062	0.893	0.868	0.433895	0	Rps9
Polr2m	2.53174e-05	0.511095	0.121	0.254	0.43794	0	Polr2m
Creg1	2.61443e-05	0.531158	0.32	0.613	0.452245	0	Creg1
Pkig	2.66506e-05	0.562038	0.223	0.428	0.461002	0	Pkig
Nenf	3.14238e-05	0.455423	0.257	0.489	0.543568	0	Nenf
Rps27a	3.36428e-05	0.344514	0.913	0.91	0.581954	0	Rps27a
Srp9	3.50841e-05	0.443049	0.288	0.546	0.606884	0	Srp9
Calm3	3.77944e-05	0.480948	0.286	0.539	0.653768	0	Calm3
Polr2k	3.94384e-05	0.383645	0.165	0.32	0.682206	0	Polr2k
Atp5g1	3.99347e-05	0.36508	0.327	0.607	0.69079	0	Atp5g1
Brk1	4.13609e-05	0.364508	0.324	0.602	0.715462	0	Brk1
Sptssa	4.25492e-05	0.407522	0.283	0.531	0.736017	0	Sptssa
Ndufb10	4.295e-05	0.50022	0.295	0.556	0.742949	0	Ndufb10
Mrpl18	4.51017e-05	0.448041	0.16	0.313	0.78017	0	Mrpl18
Higd2a	4.75448e-05	0.431407	0.262	0.493	0.82243	0	Higd2a
Sumo3	4.8909e-05	0.487086	0.148	0.291	0.846028	0	Sumo3
Dap	4.97292e-05	0.384208	0.15	0.293	0.860215	0	Dap
Ndufa5	5.08956e-05	0.525724	0.218	0.412	0.880393	0	Ndufa5
Camk1	5.32879e-05	0.392152	0.329	0.61	0.921775	0	Camk1
Hcfc1r1	5.57592e-05	0.511983	0.237	0.454	0.964523	0	Hcfc1r1
Cox4i1	5.68697e-05	0.490256	0.683	0.82	0.983732	0	Cox4i1
Sirt2	6.15621e-05	0.470711	0.206	0.384	1	0	Sirt2
Smim11	6.19202e-05	0.409545	0.165	0.319	1	0	Smim11
Fundc1	6.19654e-05	0.424076	0.138	0.273	1	0	Fundc1
Rbx1	6.24821e-05	0.324719	0.329	0.602	1	0	Rbx1
Ppp1ca	6.25674e-05	0.288273	0.363	0.65	1	0	Ppp1ca
Snrpf	7.26439e-05	0.516748	0.257	0.479	1	0	Snrpf
Ywhaz	7.57224e-05	0.258333	0.38	0.671	1	0	Ywhaz
Pkm	8.13751e-05	0.348204	0.349	0.64	1	0	Pkm
Atp5o.1	9.74528e-05	0.583658	0.288	0.53	1	0	Atp5o.1
Plscr3	9.76628e-05	0.361299	0.136	0.261	1	0	Plscr3
Dbi	9.985e-05	0.368115	0.363	0.65	1	0	Dbi
Anp32a	0.000100417	0.450125	0.344	0.628	1	0	Anp32a
Tmem160	0.000114038	0.421078	0.206	0.382	1	0	Tmem160
Pfdn1	0.000124748	0.480301	0.155	0.296	1	0	Pfdn1
Pebp1	0.00012891	0.570899	0.278	0.521	1	0	Pebp1
Snx3	0.000135098	0.798471	0.571	0.745	1	0	Snx3
Epn1	0.000141207	0.359176	0.334	0.609	1	0	Epn1
Stard3nl	0.000151746	0.48275	0.274	0.502	1	0	Stard3nl
Cox7c	0.000171434	0.632195	0.615	0.777	1	0	Cox7c
Ybx1	0.00018364	0.599176	0.625	0.784	1	0	Ybx1
Rgs10	0.000185078	0.566133	0.644	0.78	1	0	Rgs10
Skp1a	0.000209055	0.479549	0.308	0.572	1	0	Skp1a
Cox7a2l	0.000210738	0.342622	0.351	0.642	1	0	Cox7a2l
Rps10	0.000232737	0.330576	0.862	0.884	1	0	Rps10
Tln1	0.000238276	0.296935	0.404	0.71	1	0	Tln1
Rnf7	0.000239333	0.531417	0.262	0.476	1	0	Rnf7
Rpl22l1	0.000252089	0.38465	0.324	0.573	1	0	Rpl22l1
Ubxn1	0.000256409	0.58026	0.315	0.573	1	0	Ubxn1
Rpl29	0.00027336	0.393904	0.801	0.84	1	0	Rpl29
Slc48a1	0.000278209	0.417963	0.133	0.252	1	0	Slc48a1
Hmgn2	0.000287844	0.45576	0.215	0.385	1	0	Hmgn2
Ptpn18	0.000304374	0.634956	0.622	0.759	1	0	Ptpn18
Eif3k	0.000304434	0.306032	0.38	0.669	1	0	Eif3k
Mrpl23	0.00032708	0.457695	0.291	0.511	1	0	Mrpl23
Dstn	0.000327304	0.510232	0.262	0.474	1	0	Dstn
Rpl10	0.000362686	0.345119	0.893	0.859	1	0	Rpl10
Rpl26	0.000372973	0.397433	0.782	0.842	1	0	Rpl26
Rpl7a	0.000379953	0.373073	0.746	0.834	1	0	Rpl7a
Eef1a1	0.00038914	0.279976	0.961	0.925	1	0	Eef1a1
H2afv	0.000416246	0.601688	0.235	0.425	1	0	H2afv
Anapc11	0.000430087	0.540991	0.298	0.538	1	0	Anapc11
Aldh2	0.000449832	0.929298	0.504	0.636	1	0	Aldh2
Ccnd1	0.00045643	0.309535	0.332	0.534	1	0	Ccnd1
Mrps33	0.000461463	0.528608	0.247	0.441	1	0	Mrps33
Uap1l1	0.000482363	0.39445	0.15	0.276	1	0	Uap1l1
Uqcc2	0.000496881	0.567969	0.235	0.419	1	0	Uqcc2
Twf1	0.000579858	0.302731	0.157	0.28	1	0	Twf1
Stx12	0.000692805	0.342526	0.14	0.255	1	0	Stx12
Zfp706	0.00073117	0.622155	0.32	0.579	1	0	Zfp706
Ndufaf8	0.00073449	0.565588	0.182	0.322	1	0	Ndufaf8
Selenok	0.00078643	0.391171	0.373	0.659	1	0	Selenok
Ndufv3	0.000790673	0.483942	0.305	0.54	1	0	Ndufv3
Serp1	0.000793734	0.476943	0.337	0.588	1	0	Serp1
Zeb2os	0.000795551	0.534333	0.206	0.364	1	0	Zeb2os
Rps5	0.000846583	0.303132	0.879	0.852	1	0	Rps5
Cox7a2	0.000996039	0.415908	0.363	0.653	1	0	Cox7a2
Rps14	0.000998083	0.357622	0.821	0.86	1	0	Rps14
Rps17	0.00102739	0.649581	0.588	0.743	1	0	Rps17
Srp14	0.00103664	0.514319	0.305	0.541	1	0	Srp14
Rpl37a	0.00109211	0.354351	0.855	0.886	1	0	Rpl37a
Atp5k	0.00125961	0.546252	0.286	0.508	1	0	Atp5k
Myl6	0.00127222	0.359834	0.707	0.82	1	0	Myl6
Usmg5	0.0013192	0.528886	0.361	0.645	1	0	Usmg5
Tuba1b	0.00143838	0.293412	0.4	0.669	1	0	Tuba1b
Atpif1	0.0015595	0.691973	0.588	0.781	1	0	Atpif1
Gpx3	0.00163988	1.15223	0.271	0.236	1	0	Gpx3
Tbca	0.00165452	0.468034	0.346	0.615	1	0	Tbca
Snx6	0.001908	0.39043	0.346	0.585	1	0	Snx6
Nsa2	0.00195958	0.363109	0.412	0.695	1	0	Nsa2
1500011K16Rik	0.00202909	0.42095	0.148	0.259	1	0	1500011K16Rik
Lamtor1	0.00213421	0.465886	0.324	0.576	1	0	Lamtor1
Cyb5r3	0.00227249	0.537755	0.15	0.262	1	0	Cyb5r3
Pfn1	0.00239487	0.253348	0.869	0.86	1	0	Pfn1
Rnase4	0.00240643	0.259685	0.339	0.546	1	0	Rnase4
Txn2	0.002475	0.658567	0.298	0.528	1	0	Txn2
Cd164	0.00254669	0.444949	0.199	0.335	1	0	Cd164
Minos1	0.00291529	0.552279	0.291	0.508	1	0	Minos1
Tmem256	0.0030431	0.554337	0.351	0.617	1	0	Tmem256
Sec61b	0.00308658	0.304623	0.409	0.694	1	0	Sec61b
Dcxr	0.00322533	0.514983	0.172	0.293	1	0	Dcxr
Rps23	0.00329844	0.361136	0.782	0.844	1	0	Rps23
Naca	0.00372282	0.429685	0.654	0.809	1	0	Naca
Rpl7	0.00392063	0.403202	0.724	0.816	1	0	Rpl7
Edf1	0.00394017	0.424337	0.363	0.621	1	0	Edf1
Slc25a39	0.00402614	0.616526	0.247	0.424	1	0	Slc25a39
Sumo2	0.00410705	0.265836	0.45	0.739	1	0	Sumo2
Rps13	0.00426813	0.272954	0.84	0.865	1	0	Rps13
Ctsl	0.00454863	0.455585	0.298	0.488	1	0	Ctsl
Ltc4s	0.00459661	0.801573	0.387	0.376	1	0	Ltc4s
Rps15a	0.00526586	0.308202	0.855	0.859	1	0	Rps15a
Cfl1	0.00557644	0.332793	0.734	0.846	1	0	Cfl1
Romo1	0.00612136	0.603824	0.283	0.482	1	0	Romo1
Ndufa1	0.00615182	0.591433	0.293	0.505	1	0	Ndufa1
Lamtor4	0.00631375	0.56988	0.349	0.602	1	0	Lamtor4
Cltc	0.00660843	0.570384	0.593	0.736	1	0	Cltc
Trmt112	0.00672714	0.412508	0.409	0.692	1	0	Trmt112
Mcfd2	0.00696979	0.567202	0.184	0.306	1	0	Mcfd2
Calm2	0.00705429	0.640027	0.547	0.718	1	0	Calm2
Anapc13	0.00707834	0.615407	0.213	0.357	1	0	Anapc13
D8Ertd738e	0.00715664	0.523225	0.385	0.667	1	0	D8Ertd738e
Aes	0.00739959	0.629397	0.208	0.345	1	0	Aes
Ap2s1	0.00784252	0.633864	0.329	0.566	1	0	Ap2s1
Ndufc1	0.00791833	0.713939	0.288	0.487	1	0	Ndufc1
Nek7	0.00801082	0.549575	0.16	0.263	1	0	Nek7
Hmgn1	0.0085772	0.582733	0.295	0.491	1	0	Hmgn1
Atp5j2	0.00991263	0.565689	0.564	0.774	1	0	Atp5j2
Mrc1	2.27216e-62	1.17625	0.991	0.622	3.93038e-58	1	Mrc1
C5ar1	5.32197e-60	1.22421	0.782	0.257	9.20595e-56	1	C5ar1
Stab1	2.05034e-55	0.996615	0.936	0.446	3.54667e-51	1	Stab1	https://www.ncbi.nlm.nih.gov/pmc/articles/PMC4995933/	https://jcs.biologists.org/content/122/18/3365
Nrros	1.81574e-50	0.886639	0.844	0.358	3.14088e-46	1	Nrros
Pmp22	5.27281e-49	0.844947	0.617	0.168	9.12091e-45	1	Pmp22
Slc9a9	3.84144e-48	0.698989	0.69	0.215	6.64492e-44	1	Slc9a9
Fcrls	9.18716e-47	0.988095	0.926	0.456	1.5892e-42	1	Fcrls
Maf	1.23516e-46	0.93475	0.923	0.473	2.13658e-42	1	Maf
Dab2	2.18305e-46	0.930906	0.945	0.545	3.77624e-42	1	Dab2
Rab11fip5	6.81491e-46	0.65542	0.466	0.096	1.17884e-41	1	Rab11fip5
Mgl2	1.62107e-44	1.12271	0.853	0.406	2.80413e-40	1	Mgl2
Csf1r	3.09716e-42	0.789214	0.969	0.724	5.35747e-38	1	Csf1r
Pltp	1.1042e-41	0.951973	0.942	0.545	1.91004e-37	1	Pltp
Wwp1	2.2737e-41	0.594597	0.883	0.369	3.93305e-37	1	Wwp1
Nrp1	7.19569e-40	0.660648	0.724	0.29	1.24471e-35	1	Nrp1
Stk17b	1.86158e-39	0.825254	0.681	0.28	3.22016e-35	1	Stk17b
Clec4a1	3.46677e-39	0.769922	0.791	0.344	5.99682e-35	1	Clec4a1
Lrrc25	1.29862e-38	0.846499	0.788	0.374	2.24635e-34	1	Lrrc25
Serinc3	1.58985e-38	0.738714	0.954	0.576	2.75012e-34	1	Serinc3
Cd93	1.64331e-38	0.868981	0.543	0.173	2.8426e-34	1	Cd93
Ap2a2	1.91768e-38	0.524052	0.666	0.24	3.3172e-34	1	Ap2a2
Tcn2	1.01781e-37	0.587901	0.687	0.264	1.76061e-33	1	Tcn2
Slco2b1	3.27386e-37	0.667403	0.623	0.218	5.66312e-33	1	Slco2b1
Trf1	3.49555e-37	0.637995	0.699	0.286	6.04659e-33	1	Trf
Ehd4	3.62719e-37	0.798664	0.917	0.567	6.27432e-33	1	Ehd4
Stard8	1.1909e-36	0.505891	0.512	0.144	2.06001e-32	1	Stard8
Itsn1	1.20478e-36	0.484889	0.592	0.178	2.08403e-32	1	Itsn1
Ap1b11	2.49988e-36	0.468868	0.626	0.219	4.32429e-32	1	Ap1b1
C1qc	3.25027e-36	0.635471	0.988	0.839	5.62232e-32	1	C1qc
P2ry6	3.25035e-36	0.706489	0.902	0.463	5.62245e-32	1	P2ry6
Cd14	6.54958e-36	0.688515	0.807	0.371	1.13295e-31	1	Cd14
Dse	7.22578e-36	0.58688	0.663	0.261	1.24992e-31	1	Dse
Dclre1c	1.06935e-35	0.468965	0.509	0.15	1.84976e-31	1	Dclre1c
Ctsb1	9.05919e-35	0.705636	0.991	0.837	1.56706e-30	1	Ctsb
Itm2b1	2.56136e-34	0.623822	0.979	0.918	4.43064e-30	1	Itm2b
Mfsd11	2.67811e-34	0.495297	0.457	0.121	4.63259e-30	1	Mfsd11
Gas61	2.95725e-34	0.616156	0.84	0.375	5.11544e-30	1	Gas6
Tmem37	3.76825e-34	0.633617	0.518	0.168	6.51832e-30	1	Tmem37
Pla2g7	3.96209e-34	0.656855	0.758	0.339	6.85363e-30	1	Pla2g7
Scamp5	4.28982e-34	0.46717	0.399	0.093	7.42054e-30	1	Scamp5
Gpr34	4.61085e-34	0.668634	0.62	0.24	7.97585e-30	1	Gpr34
Rnase41	4.69359e-34	0.666756	0.804	0.364	8.11897e-30	1	Rnase4
Eps8	1.01639e-33	0.594381	0.5	0.161	1.75815e-29	1	Eps8
Il10rb	1.15672e-33	0.588485	0.663	0.292	2.00089e-29	1	Il10rb
Cfp	1.66332e-33	0.683881	0.752	0.329	2.87721e-29	1	Cfp
Adgre1	3.30424e-33	0.771194	0.89	0.51	5.71567e-29	1	Adgre1
F13a11	5.24274e-33	0.708065	0.862	0.443	9.0689e-29	1	F13a1
Bank1	1.02133e-32	0.323894	0.414	0.104	1.7667e-28	1	Bank1
Ifitm2	1.75215e-32	0.735289	0.896	0.556	3.03087e-28	1	Ifitm2
Clec10a	2.70477e-32	0.623832	0.663	0.257	4.67872e-28	1	Clec10a
Cd302	4.41938e-32	0.540011	0.758	0.364	7.64465e-28	1	Cd302
Pf41	5.81577e-32	0.704	0.936	0.59	1.00601e-27	1	Pf4
Cltc1	8.8732e-32	0.654	0.929	0.605	1.53489e-27	1	Cltc
Lyl1	1.02022e-31	0.646356	0.644	0.27	1.76478e-27	1	Lyl1
Abca9	1.20885e-31	0.608731	0.684	0.292	2.09107e-27	1	Abca9
Hacd4	1.29313e-31	0.678028	0.684	0.305	2.23686e-27	1	Hacd4
Cebpd	2.0064e-31	0.675385	0.644	0.274	3.47068e-27	1	Cebpd
Cbr21	2.97065e-31	0.700207	0.871	0.439	5.13863e-27	1	Cbr2
Cd163	5.05136e-31	0.621143	0.482	0.141	8.73784e-27	1	Cd163
Sbf2	6.56871e-31	0.415044	0.439	0.124	1.13625e-26	1	Sbf2
Irf2bp2	8.84761e-31	0.407024	0.571	0.207	1.53046e-26	1	Irf2bp2
Rsrp1	1.02625e-30	0.701736	0.929	0.593	1.77521e-26	1	Rsrp1
Abca1	1.07146e-30	0.639294	0.595	0.229	1.85341e-26	1	Abca1
Fcgr3	1.09456e-30	0.694804	0.926	0.607	1.89337e-26	1	Fcgr3
C3ar1	1.37569e-30	0.749266	0.804	0.385	2.37966e-26	1	C3ar1
Serpinf1	1.59237e-30	0.636141	0.54	0.199	2.75449e-26	1	Serpinf1
Ifngr1	5.3013e-30	0.635419	0.899	0.502	9.17018e-26	1	Ifngr1
Nisch	1.12607e-29	0.507791	0.66	0.296	1.94787e-25	1	Nisch
Aplp2	1.9867e-29	0.624917	0.647	0.284	3.4366e-25	1	Aplp2
Eps151	2.05311e-29	0.452189	0.718	0.345	3.55147e-25	1	Eps15
Timp2	6.53302e-29	0.524707	0.727	0.337	1.13008e-24	1	Timp2
Zfp36l1	1.20025e-28	0.514064	0.893	0.513	2.0762e-24	1	Zfp36l1
Selenop1	1.72617e-28	0.593651	0.972	0.8	2.98594e-24	1	Selenop
Ltc4s1	1.75944e-28	0.647993	0.669	0.278	3.04349e-24	1	Ltc4s
Hfe	2.21439e-28	0.551439	0.644	0.302	3.83045e-24	1	Hfe
Tnfrsf1a	2.64345e-28	0.476621	0.727	0.353	4.57264e-24	1	Tnfrsf1a
Txnip	2.79346e-28	0.663977	0.923	0.585	4.83213e-24	1	Txnip
Ctsc	3.99225e-28	0.624955	0.969	0.697	6.90579e-24	1	Ctsc
Scamp2	6.4934e-28	0.577725	0.801	0.452	1.12323e-23	1	Scamp2
Snx61	1.40643e-27	0.554749	0.764	0.417	2.43284e-23	1	Snx6
Igf11	1.48829e-27	0.380729	0.736	0.306	2.57444e-23	1	Igf1
Tmcc1	1.59138e-27	0.345898	0.525	0.19	2.75278e-23	1	Tmcc1
Fli1	1.9348e-27	0.454824	0.564	0.234	3.34682e-23	1	Fli1
Snx8	2.45989e-27	0.342379	0.482	0.168	4.25511e-23	1	Snx8
Sh3gl1	3.39511e-27	0.412217	0.414	0.13	5.87285e-23	1	Sh3gl1
B4galt6	3.9352e-27	0.473333	0.426	0.134	6.8071e-23	1	B4galt6
Cmah	5.12041e-27	0.364342	0.313	0.071	8.85728e-23	1	Cmah
Zfp36l2	6.54697e-27	0.525053	0.822	0.426	1.1325e-22	1	Zfp36l2
Sult1a1	6.62086e-27	0.392623	0.58	0.232	1.14528e-22	1	Sult1a1
Rnf1301	6.86934e-27	0.396763	0.632	0.276	1.18826e-22	1	Rnf130
Snx2	8.53209e-27	0.543987	0.837	0.493	1.47588e-22	1	Snx2
Idh21	1.05882e-26	0.438198	0.629	0.273	1.83155e-22	1	Idh2
Fcgrt	2.16923e-26	0.548758	0.868	0.499	3.75234e-22	1	Fcgrt
Selenbp1	2.3918e-26	0.497327	0.383	0.115	4.13734e-22	1	Selenbp1
Rab24	2.86814e-26	0.389811	0.518	0.199	4.9613e-22	1	Rab24
Slc3a2	3.24776e-26	0.500169	0.635	0.295	5.61798e-22	1	Slc3a2
Ptgs1	3.31228e-26	0.394808	0.469	0.16	5.72958e-22	1	Ptgs1
Rnf150	3.58708e-26	0.385583	0.411	0.126	6.20492e-22	1	Rnf150
Mpp1	4.86229e-26	0.389678	0.672	0.301	8.41078e-22	1	Mpp1
Mtss1	5.3176e-26	0.391503	0.485	0.172	9.19839e-22	1	Mtss1
Cfh	5.96681e-26	0.614856	0.666	0.319	1.03214e-21	1	Cfh
Rab3il1	9.31406e-26	0.439722	0.696	0.328	1.61115e-21	1	Rab3il1
Tm9sf2	1.13363e-25	0.408925	0.598	0.273	1.96095e-21	1	Tm9sf2
Clcn5	1.18722e-25	0.383764	0.319	0.077	2.05366e-21	1	Clcn5
Igfbp41	1.22541e-25	0.392598	0.908	0.488	2.11972e-21	1	Igfbp4
Tnfaip8l2	1.24326e-25	0.502233	0.706	0.359	2.15059e-21	1	Tnfaip8l2
Ncoa4	1.88375e-25	0.348644	0.583	0.238	3.25851e-21	1	Ncoa4
Slc43a2	1.98905e-25	0.433993	0.482	0.18	3.44066e-21	1	Slc43a2
Hmox11	3.59304e-25	0.370871	0.537	0.216	6.21523e-21	1	Hmox1
Clec4a2	4.1593e-25	0.456793	0.831	0.46	7.19476e-21	1	Clec4a2
B3galnt1	4.19978e-25	0.36424	0.371	0.107	7.26478e-21	1	B3galnt1
Rnasel	4.50891e-25	0.44783	0.399	0.122	7.7995e-21	1	Rnasel
Slc29a1	4.59821e-25	0.297336	0.577	0.245	7.95398e-21	1	Slc29a1
Dhrs3	4.91476e-25	0.418881	0.638	0.295	8.50155e-21	1	Dhrs3
Man1a	6.70262e-25	0.453078	0.411	0.14	1.15942e-20	1	Man1a
Cd300a	6.97236e-25	0.51139	0.586	0.259	1.20608e-20	1	Cd300a
Ms4a6b	7.24172e-25	0.514264	0.819	0.436	1.25267e-20	1	Ms4a6b
Asah1	8.93586e-25	0.500455	0.844	0.492	1.54572e-20	1	Asah1
Etv5	9.1941e-25	0.412666	0.337	0.095	1.59039e-20	1	Etv5
Dok2	9.34668e-25	0.299768	0.433	0.14	1.61679e-20	1	Dok2
Grn	1.0846e-24	0.521352	0.966	0.716	1.87614e-20	1	Grn
Ninj11	1.50288e-24	0.386102	0.745	0.381	2.59969e-20	1	Ninj1
Ets2	1.65219e-24	0.502574	0.261	0.055	2.85795e-20	1	Ets2
Cd300ld	2.10814e-24	0.461919	0.537	0.221	3.64666e-20	1	Cd300ld
Trim47	2.65389e-24	0.505601	0.448	0.166	4.5907e-20	1	Trim47
Gna12	3.06039e-24	0.25591	0.488	0.179	5.29386e-20	1	Gna12
Hip1	3.14258e-24	0.411297	0.414	0.139	5.43603e-20	1	Hip1
Lgmn	3.24317e-24	0.612031	0.942	0.679	5.61003e-20	1	Lgmn
Prdx4	3.58596e-24	0.442922	0.506	0.205	6.203e-20	1	Prdx4
Tmem106a	6.95936e-24	0.442695	0.718	0.366	1.20383e-19	1	Tmem106a
Ctsl1	9.86127e-24	0.345303	0.69	0.333	1.7058e-19	1	Ctsl
Lamp2	1.02355e-23	0.495369	0.764	0.426	1.77054e-19	1	Lamp2
Myo5a	1.07108e-23	0.45179	0.675	0.342	1.85275e-19	1	Myo5a
Iqgap2	1.3291e-23	0.358027	0.377	0.118	2.29907e-19	1	Iqgap2
Slc7a8	1.49744e-23	0.401324	0.383	0.126	2.59027e-19	1	Slc7a8
Fcgr2b	1.52441e-23	0.53491	0.871	0.483	2.63692e-19	1	Fcgr2b
Vsir	2.20102e-23	0.500294	0.779	0.396	3.80733e-19	1	Vsir
Lrp6	2.25602e-23	0.258613	0.42	0.134	3.90246e-19	1	Lrp6
Adrb2	2.72491e-23	0.493375	0.433	0.159	4.71354e-19	1	Adrb2
Glul	3.84261e-23	0.35097	0.868	0.498	6.64695e-19	1	Glul
Ndfip1	8.01622e-23	0.442593	0.73	0.409	1.38664e-18	1	Ndfip1
Pepd	8.03695e-23	0.341704	0.564	0.26	1.39023e-18	1	Pepd
P2ry12	1.01556e-22	0.366769	0.482	0.179	1.75671e-18	1	P2ry12
Ppp3ca	1.15834e-22	0.285211	0.497	0.206	2.00369e-18	1	Ppp3ca
App	1.30924e-22	0.502857	0.822	0.488	2.26472e-18	1	App
Atraid	1.39622e-22	0.444224	0.466	0.187	2.41518e-18	1	Atraid
Folr21	1.62214e-22	0.552162	0.512	0.194	2.80597e-18	1	Folr2
Man1c1	2.26989e-22	0.334535	0.405	0.141	3.92645e-18	1	Man1c1
Ang	2.52568e-22	0.388501	0.525	0.214	4.36892e-18	1	Ang
Cd63	2.93285e-22	0.518309	0.877	0.532	5.07324e-18	1	Cd63
Blvrb1	2.93581e-22	0.302594	0.893	0.516	5.07837e-18	1	Blvrb
Tsc22d3	3.19178e-22	0.513482	0.623	0.302	5.52114e-18	1	Tsc22d3
Rhob	3.19696e-22	0.546386	0.583	0.259	5.5301e-18	1	Rhob
Ebi3	4.33527e-22	0.385159	0.58	0.269	7.49914e-18	1	Ebi3
Ccl24	1.25435e-21	0.369137	0.353	0.101	2.16978e-17	1	Ccl24
Nucb1	1.45635e-21	0.358079	0.525	0.233	2.51919e-17	1	Nucb1
Glmp	1.55157e-21	0.469484	0.678	0.347	2.68391e-17	1	Glmp
Alox5	1.57032e-21	0.385447	0.365	0.122	2.71635e-17	1	Alox5
Tmem59	1.76122e-21	0.466645	0.813	0.469	3.04656e-17	1	Tmem59
Srgap2	2.06473e-21	0.33735	0.574	0.257	3.57157e-17	1	Srgap2
Rnpep	2.24415e-21	0.357639	0.65	0.33	3.88192e-17	1	Rnpep
Borcs6	2.38725e-21	0.356616	0.408	0.154	4.12947e-17	1	Borcs6
Etv1	2.50101e-21	0.299152	0.267	0.063	4.32624e-17	1	Etv1
Cd48	3.70247e-21	0.460852	0.721	0.395	6.40454e-17	1	Cd48
Wdfy3	3.83784e-21	0.280521	0.365	0.118	6.63869e-17	1	Wdfy3
Gas7	4.18615e-21	0.330401	0.399	0.141	7.24119e-17	1	Gas7
Hmox2	4.22795e-21	0.390629	0.739	0.417	7.3135e-17	1	Hmox2
Hspa5	6.35108e-21	0.533633	0.871	0.523	1.09861e-16	1	Hspa5
Rac3	6.65405e-21	0.294106	0.359	0.119	1.15102e-16	1	Rac3
Cd36	6.87964e-21	0.48598	0.528	0.224	1.19004e-16	1	Cd36
Ppp1r21	7.06811e-21	0.358549	0.42	0.159	1.22264e-16	1	Ppp1r21
Wasf2	7.66969e-21	0.373719	0.742	0.405	1.3267e-16	1	Wasf2
Sirpa	7.92361e-21	0.391823	0.791	0.441	1.37063e-16	1	Sirpa
Rap1b	8.76601e-21	0.423809	0.785	0.452	1.51635e-16	1	Rap1b
Rbm47	1.14076e-20	0.345682	0.402	0.154	1.97329e-16	1	Rbm47
Nr3c1	1.17368e-20	0.356643	0.567	0.265	2.03024e-16	1	Nr3c1
Acap2	1.20055e-20	0.403702	0.528	0.246	2.07671e-16	1	Acap2
Itgam	1.23327e-20	0.42159	0.396	0.149	2.1333e-16	1	Itgam
Atp6ap1	1.28167e-20	0.437188	0.758	0.425	2.21704e-16	1	Atp6ap1
Rock2	1.35024e-20	0.261406	0.408	0.153	2.33565e-16	1	Rock2
Rin2	1.61949e-20	0.338654	0.423	0.158	2.8014e-16	1	Rin2
Mon2	1.69707e-20	0.295127	0.279	0.077	2.93558e-16	1	Mon2
Plbd2	1.78791e-20	0.365619	0.506	0.231	3.09272e-16	1	Plbd2
Cep68	4.84798e-20	0.269003	0.288	0.084	8.38604e-16	1	Cep68
Prrc2a	4.86699e-20	0.382344	0.482	0.219	8.41892e-16	1	Prrc2a
Tubb2a	4.96604e-20	0.405494	0.69	0.371	8.59026e-16	1	Tubb2a
Calr	5.38948e-20	0.406165	0.773	0.41	9.32273e-16	1	Calr
Cd33	6.48085e-20	0.370792	0.62	0.292	1.12106e-15	1	Cd33
Canx	7.10537e-20	0.313896	0.807	0.473	1.22909e-15	1	Canx
Ahnak	7.99026e-20	0.41588	0.693	0.353	1.38216e-15	1	Ahnak
Tspan4	8.07212e-20	0.347533	0.319	0.101	1.39632e-15	1	Tspan4
Sft2d1	8.56512e-20	0.358748	0.742	0.411	1.48159e-15	1	Sft2d1
Mfsd1	9.84406e-20	0.387701	0.571	0.284	1.70283e-15	1	Mfsd1
Rgs18	9.86038e-20	0.372397	0.356	0.125	1.70565e-15	1	Rgs18
Twf11	1.05588e-19	0.261106	0.436	0.171	1.82647e-15	1	Twf1
Scpep1	1.27755e-19	0.372863	0.644	0.332	2.2099e-15	1	Scpep1
Fxyd2	1.3038e-19	0.356508	0.405	0.147	2.25531e-15	1	Fxyd2
Tpp1	1.32473e-19	0.424921	0.626	0.332	2.29152e-15	1	Tpp1
Slc25a45	1.51521e-19	0.462349	0.35	0.129	2.621e-15	1	Slc25a45
Ctsf	1.8187e-19	0.30657	0.359	0.12	3.14599e-15	1	Ctsf
Frmd4b	1.84896e-19	0.290382	0.528	0.241	3.19833e-15	1	Frmd4b
Lyz2	1.99377e-19	0.484528	0.982	0.89	3.44883e-15	1	Lyz2
Ptprj	2.17057e-19	0.378091	0.534	0.252	3.75465e-15	1	Ptprj
Atxn7l3b	2.25359e-19	0.266688	0.613	0.311	3.89826e-15	1	Atxn7l3b
Saraf	2.3186e-19	0.280538	0.589	0.287	4.01071e-15	1	Saraf
Dhrs7	2.58828e-19	0.38062	0.411	0.171	4.47721e-15	1	Dhrs7
Lipa	3.10904e-19	0.482302	0.598	0.3	5.37802e-15	1	Lipa
Rnf141	3.21868e-19	0.278666	0.405	0.157	5.56768e-15	1	Rnf141
C1qa	3.52209e-19	0.44829	0.997	0.841	6.0925e-15	1	C1qa
Paox	3.59702e-19	0.301905	0.362	0.126	6.22212e-15	1	Paox
Pla2g15	4.74127e-19	0.352646	0.589	0.286	8.20145e-15	1	Pla2g15
Ctsa	5.46984e-19	0.484841	0.911	0.609	9.46174e-15	1	Ctsa
C1qb	5.63563e-19	0.470891	0.972	0.843	9.74852e-15	1	C1qb
Ms4a4a	6.41448e-19	0.424126	0.534	0.235	1.10958e-14	1	Ms4a4a
Rab1a	6.59222e-19	0.254635	0.574	0.279	1.14032e-14	1	Rab1a
Atp6v1a	6.69292e-19	0.401726	0.445	0.189	1.15774e-14	1	Atp6v1a
Msr1	7.77114e-19	0.289525	0.325	0.107	1.34425e-14	1	Msr1
Ifi27	9.07564e-19	0.323288	0.555	0.266	1.5699e-14	1	Ifi27
Mid1ip1	1.09613e-18	0.287423	0.368	0.137	1.89608e-14	1	Mid1ip1
Tsc22d4	1.10259e-18	0.297317	0.748	0.409	1.90725e-14	1	Tsc22d4
Lman1	1.11524e-18	0.321102	0.429	0.178	1.92915e-14	1	Lman1
Tanc2	1.44684e-18	0.311388	0.337	0.113	2.50275e-14	1	Tanc2
Rabac11	1.62496e-18	0.314676	0.767	0.448	2.81086e-14	1	Rabac1
Atp2b1	1.65883e-18	0.360473	0.798	0.468	2.86944e-14	1	Atp2b1
Mitf	1.74646e-18	0.348069	0.411	0.168	3.02103e-14	1	Mitf
Plxnb2	1.83134e-18	0.283191	0.537	0.252	3.16786e-14	1	Plxnb2
Cndp21	2.24251e-18	0.276189	0.678	0.372	3.8791e-14	1	Cndp2
Sesn1	2.27286e-18	0.293017	0.488	0.215	3.9316e-14	1	Sesn1
Tlr7	2.89673e-18	0.293097	0.316	0.107	5.01076e-14	1	Tlr7
Fh1	3.32484e-18	0.270257	0.429	0.183	5.75131e-14	1	Fh1
Clec4a3	3.83117e-18	0.353158	0.684	0.361	6.62716e-14	1	Clec4a3
St3gal6	4.18422e-18	0.367167	0.475	0.211	7.23787e-14	1	St3gal6
Rpn1	4.1924e-18	0.337474	0.629	0.322	7.25201e-14	1	Rpn1
Zfhx3	4.19841e-18	0.272317	0.583	0.276	7.2624e-14	1	Zfhx3
Rab14	5.26263e-18	0.298829	0.807	0.494	9.10329e-14	1	Rab14
Fam46a	5.71681e-18	0.458555	0.479	0.214	9.88894e-14	1	Fam46a
Trim41	5.75317e-18	0.342186	0.35	0.131	9.95184e-14	1	Trim41
Atp6v0b	5.92911e-18	0.398563	0.893	0.589	1.02562e-13	1	Atp6v0b
Fam212a	6.07795e-18	0.30405	0.288	0.091	1.05136e-13	1	Fam212a
Aoah	6.11812e-18	0.260281	0.472	0.207	1.05831e-13	1	Aoah
Maf1	6.13121e-18	0.264407	0.509	0.241	1.06058e-13	1	Maf1
Rbfa	9.38996e-18	0.296213	0.475	0.22	1.62428e-13	1	Rbfa
Entpd1	1.05542e-17	0.256539	0.546	0.253	1.82567e-13	1	Entpd1
Manf	1.07002e-17	0.398264	0.567	0.296	1.85091e-13	1	Manf
Lrp1	1.13043e-17	0.301518	0.601	0.3	1.95542e-13	1	Lrp1
Pura	1.47703e-17	0.269314	0.319	0.112	2.55497e-13	1	Pura
Gpr160	1.64872e-17	0.269864	0.399	0.163	2.85196e-13	1	Gpr160
Ier3	1.8689e-17	0.529001	0.261	0.077	3.23282e-13	1	Ier3
Snx31	1.93099e-17	0.255657	0.896	0.615	3.34022e-13	1	Snx3
Nfic	1.9373e-17	0.292034	0.543	0.273	3.35114e-13	1	Nfic
Hsp90b1	1.9447e-17	0.416815	0.917	0.596	3.36394e-13	1	Hsp90b1
Ppp1cc	1.96657e-17	0.271146	0.497	0.231	3.40177e-13	1	Ppp1cc
Cd1641	2.00069e-17	0.2502	0.488	0.221	3.4608e-13	1	Cd164
Tgfbr2	2.12066e-17	0.284095	0.69	0.372	3.66831e-13	1	Tgfbr2
G3bp2	2.21268e-17	0.272952	0.672	0.378	3.8275e-13	1	G3bp2
Calm21	2.26833e-17	0.388376	0.871	0.589	3.92376e-13	1	Calm2
Atp6ap2	3.43602e-17	0.398185	0.595	0.31	5.94362e-13	1	Atp6ap2
Rpn2	3.66945e-17	0.271796	0.681	0.363	6.34742e-13	1	Rpn2
Ech1	4.30752e-17	0.272176	0.571	0.295	7.45115e-13	1	Ech1
Hnrnph1	5.23386e-17	0.277149	0.445	0.198	9.05354e-13	1	Hnrnph1
Sema4a	6.08245e-17	0.297636	0.521	0.259	1.05214e-12	1	Sema4a
Cd68	6.28132e-17	0.473708	0.893	0.607	1.08654e-12	1	Cd68
Tnfaip8	6.47341e-17	0.330377	0.675	0.375	1.11977e-12	1	Tnfaip8
Laptm4a	7.48186e-17	0.393452	0.896	0.633	1.29421e-12	1	Laptm4a
Tmem50a	7.91776e-17	0.325956	0.856	0.541	1.36961e-12	1	Tmem50a
CAAA01147332.1	8.08005e-17	0.508357	0.583	0.319	1.39769e-12	1	CAAA01147332.1
Smpdl3b	8.39381e-17	0.402568	0.276	0.09	1.45196e-12	1	Smpdl3b
Mknk1	9.06734e-17	0.276477	0.408	0.174	1.56847e-12	1	Mknk1
Sgpl1	9.71448e-17	0.258727	0.426	0.189	1.68041e-12	1	Sgpl1
Ly96	9.87715e-17	0.312949	0.411	0.18	1.70855e-12	1	Ly96
Tmed10	1.04573e-16	0.374769	0.794	0.493	1.8089e-12	1	Tmed10
Sdf2	1.0677e-16	0.31337	0.405	0.177	1.84691e-12	1	Sdf2
Alox5ap	1.20837e-16	0.4289	0.933	0.592	2.09023e-12	1	Alox5ap
Zbtb7a	1.28968e-16	0.405986	0.448	0.217	2.23089e-12	1	Zbtb7a
Apoe1	1.53362e-16	0.388017	0.988	0.852	2.65286e-12	1	Apoe
Pros1	1.57267e-16	0.278244	0.334	0.125	2.72041e-12	1	Pros1
Gnai2	1.5747e-16	0.434669	0.877	0.585	2.72392e-12	1	Gnai2
Abhd12	1.68964e-16	0.279603	0.782	0.454	2.92274e-12	1	Abhd12
P2rx4	1.82178e-16	0.387762	0.601	0.324	3.15131e-12	1	P2rx4
Pxn	2.02603e-16	0.286443	0.356	0.142	3.50463e-12	1	Pxn
Tm2d3	2.08024e-16	0.323062	0.334	0.133	3.59839e-12	1	Tm2d3
Rassf4	2.25119e-16	0.31213	0.736	0.427	3.8941e-12	1	Rassf4
Pdia4	2.56649e-16	0.299361	0.518	0.26	4.43951e-12	1	Pdia4
Stard9	2.74205e-16	0.269667	0.405	0.171	4.7432e-12	1	Stard9
Selenof	2.82473e-16	0.250155	0.831	0.524	4.88622e-12	1	Selenof
Pdia6	3.17679e-16	0.32944	0.745	0.422	5.49521e-12	1	Pdia6
Lrmp	3.27825e-16	0.284599	0.365	0.145	5.67072e-12	1	Lrmp
Jak1	3.28187e-16	0.279187	0.589	0.317	5.67697e-12	1	Jak1
Adam15	3.38768e-16	0.294077	0.613	0.337	5.86001e-12	1	Adam15
Mfsd5	3.54928e-16	0.422652	0.405	0.188	6.13954e-12	1	Mfsd5
Gpr183	3.81721e-16	0.382358	0.479	0.234	6.60302e-12	1	Gpr183
Cd81	5.78146e-16	0.383765	0.902	0.584	1.00008e-11	1	Cd81
Dmac11	6.13422e-16	0.275688	0.549	0.287	1.0611e-11	1	Dmac1
Atp1a1	6.20706e-16	0.348653	0.521	0.261	1.0737e-11	1	Atp1a1
Map3k11	6.6781e-16	0.300282	0.39	0.169	1.15518e-11	1	Map3k11
Serpinb8	7.4966e-16	0.278446	0.304	0.111	1.29676e-11	1	Serpinb8
Hexa	7.86619e-16	0.34184	0.877	0.569	1.36069e-11	1	Hexa
Slc31a2	8.95629e-16	0.291992	0.328	0.125	1.54926e-11	1	Slc31a2
Mgat1	9.72463e-16	0.344881	0.402	0.175	1.68217e-11	1	Mgat1
Hk3	1.17736e-15	0.250519	0.325	0.125	2.03659e-11	1	Hk3
Klf2	1.48857e-15	0.537849	0.417	0.192	2.57492e-11	1	Klf2
Pld4	2.20362e-15	0.396658	0.917	0.605	3.81181e-11	1	Pld4
Grb2	2.5819e-15	0.33677	0.469	0.232	4.46617e-11	1	Grb2
Arhgef3	2.88947e-15	0.3474	0.261	0.087	4.9982e-11	1	Arhgef3
Unc93b1	3.15188e-15	0.398482	0.966	0.728	5.45213e-11	1	Unc93b1
Lamp1	3.16887e-15	0.421271	0.896	0.621	5.48151e-11	1	Lamp1
Prpf8	3.39276e-15	0.26363	0.482	0.241	5.86879e-11	1	Prpf8
Tex264	3.54131e-15	0.286087	0.362	0.157	6.12576e-11	1	Tex264
Rnaset2b	3.76587e-15	0.305587	0.362	0.155	6.51421e-11	1	Rnaset2b
Ppp5c	3.81872e-15	0.328809	0.301	0.115	6.60562e-11	1	Ppp5c
Il16	3.87892e-15	0.286713	0.46	0.223	6.70975e-11	1	Il16
Dok3	3.97299e-15	0.310775	0.491	0.244	6.87248e-11	1	Dok3
Rchy1	4.65725e-15	0.365673	0.374	0.164	8.05611e-11	1	Rchy1
Snrpb2	5.08098e-15	0.253401	0.512	0.26	8.78908e-11	1	Snrpb2
Fam105a	5.09759e-15	0.275839	0.663	0.349	8.81781e-11	1	Fam105a
Siglec1	5.16579e-15	0.329035	0.356	0.144	8.93578e-11	1	Siglec1
P2rx7	5.17426e-15	0.360471	0.353	0.151	8.95044e-11	1	P2rx7
Lpin2	6.48191e-15	0.343364	0.387	0.174	1.12124e-10	1	Lpin2
Cx3cr1	7.73206e-15	0.30266	0.788	0.44	1.33749e-10	1	Cx3cr1
Cryl1	8.45756e-15	0.325345	0.337	0.139	1.46299e-10	1	Cryl1
Naa20	8.51119e-15	0.259187	0.356	0.157	1.47227e-10	1	Naa20
Plod1	8.83527e-15	0.257685	0.337	0.137	1.52833e-10	1	Plod1
Slc11a1	9.81455e-15	0.253051	0.586	0.301	1.69772e-10	1	Slc11a1
Clec2d	1.14909e-14	0.357672	0.647	0.36	1.9877e-10	1	Clec2d
Tbxas1	1.21307e-14	0.297616	0.466	0.229	2.09838e-10	1	Tbxas1
Arrb2	1.91744e-14	0.262318	0.822	0.506	3.31679e-10	1	Arrb2
Wdfy2	1.91891e-14	0.25392	0.331	0.135	3.31934e-10	1	Wdfy2
Xbp1	1.98764e-14	0.279235	0.567	0.306	3.43821e-10	1	Xbp1
Zdhhc20	2.1599e-14	0.375509	0.39	0.18	3.73619e-10	1	Zdhhc20
Tgfbi	2.20491e-14	0.338539	0.847	0.506	3.81406e-10	1	Tgfbi
Eid1	2.4696e-14	0.255663	0.399	0.184	4.27191e-10	1	Eid1
Tm9sf4	2.82968e-14	0.378618	0.282	0.11	4.89477e-10	1	Tm9sf4
Emp3	3.67838e-14	0.426015	0.837	0.522	6.36285e-10	1	Emp3
Fkbp4	4.31797e-14	0.287383	0.426	0.204	7.46922e-10	1	Fkbp4
Os9	5.15754e-14	0.271322	0.528	0.279	8.92151e-10	1	Os9
Hsd17b12	5.31787e-14	0.32677	0.426	0.213	9.19886e-10	1	Hsd17b12
Tmem173	5.52114e-14	0.318798	0.472	0.249	9.55046e-10	1	Tmem173
Marcks	5.56974e-14	0.368771	0.89	0.599	9.63454e-10	1	Marcks
Ubtd1	5.63353e-14	0.270431	0.307	0.125	9.74488e-10	1	Ubtd1
Arl6ip1	6.91978e-14	0.274493	0.81	0.509	1.19698e-09	1	Arl6ip1
Lilra5	7.58403e-14	0.279603	0.411	0.18	1.31189e-09	1	Lilra5
Eng	8.52856e-14	0.288481	0.279	0.106	1.47527e-09	1	Eng
Zfp703	9.61692e-14	0.256216	0.261	0.095	1.66354e-09	1	Zfp703
Slfn2	9.89058e-14	0.289042	0.653	0.369	1.71087e-09	1	Slfn2
Ssr2	1.02816e-13	0.266696	0.46	0.235	1.77851e-09	1	Ssr2
Tm9sf3	1.03534e-13	0.278579	0.399	0.193	1.79093e-09	1	Tm9sf3
Degs1	1.07799e-13	0.327311	0.463	0.24	1.8647e-09	1	Degs1
Tifa	2.17932e-13	0.250137	0.439	0.223	3.76979e-09	1	Tifa
Klhl9	2.34512e-13	0.259574	0.288	0.113	4.05659e-09	1	Klhl9
Mindy2	2.53063e-13	0.293436	0.301	0.127	4.37748e-09	1	Mindy2
Rtn4	3.02431e-13	0.270864	0.782	0.469	5.23145e-09	1	Rtn4
Lfng	4.66002e-13	0.398843	0.34	0.158	8.0609e-09	1	Lfng
Tmed9	5.30867e-13	0.287575	0.663	0.386	9.18293e-09	1	Tmed9
Cebpa	6.12014e-13	0.284688	0.39	0.187	1.05866e-08	1	Cebpa
Ptp4a2	6.66153e-13	0.253644	0.712	0.431	1.15231e-08	1	Ptp4a2
Siglece	6.70588e-13	0.338277	0.454	0.229	1.15998e-08	1	Siglece
Tob2	8.04238e-13	0.347586	0.344	0.156	1.39117e-08	1	Tob2
Cmtm3	1.03513e-12	0.289536	0.518	0.289	1.79057e-08	1	Cmtm3
Crlf2	1.09606e-12	0.345836	0.577	0.336	1.89596e-08	1	Crlf2
Gaa	1.30699e-12	0.271939	0.325	0.146	2.26084e-08	1	Gaa
Pbrm1	1.34631e-12	0.268415	0.337	0.157	2.32885e-08	1	Pbrm1
Pdcd2l	1.57454e-12	0.278779	0.414	0.205	2.72364e-08	1	Pdcd2l
Peak1	1.87363e-12	0.290719	0.276	0.112	3.241e-08	1	Peak1
Orai1	1.88149e-12	0.31585	0.393	0.197	3.2546e-08	1	Orai1
Metrnl	3.07125e-12	0.28801	0.267	0.106	5.31265e-08	1	Metrnl
Cpsf2	3.13013e-12	0.289734	0.31	0.136	5.4145e-08	1	Cpsf2
Hnrnpab	4.24632e-12	0.37375	0.482	0.271	7.34528e-08	1	Hnrnpab
Clcn4	5.16866e-12	0.284494	0.294	0.124	8.94075e-08	1	Clcn4
Sh2b3	5.48101e-12	0.325297	0.313	0.143	9.48106e-08	1	Sh2b3
Unc50	7.29479e-12	0.253401	0.334	0.157	1.26185e-07	1	Unc50
Tmco1	7.63992e-12	0.285967	0.457	0.24	1.32155e-07	1	Tmco1
Dscr3	8.11045e-12	0.262742	0.258	0.104	1.40295e-07	1	Dscr3
Ppib	9.05415e-12	0.267292	0.868	0.554	1.56619e-07	1	Ppib
Dnase2a	1.7466e-11	0.314191	0.479	0.272	3.02127e-07	1	Dnase2a
Pigk	1.869e-11	0.269704	0.27	0.113	3.23299e-07	1	Pigk
Ptafr	1.93639e-11	0.28011	0.35	0.171	3.34957e-07	1	Ptafr
Pnpla2	2.24207e-11	0.268292	0.344	0.17	3.87833e-07	1	Pnpla2
Emc7	2.96478e-11	0.267565	0.439	0.242	5.12848e-07	1	Emc7
Ms4a6c	3.17933e-11	0.328162	0.868	0.577	5.49961e-07	1	Ms4a6c
Lman2	3.29591e-11	0.261531	0.509	0.299	5.70126e-07	1	Lman2
Sh3pxd2b	3.41167e-11	0.26561	0.27	0.116	5.9015e-07	1	Sh3pxd2b
Selenos	4.1877e-11	0.268845	0.469	0.264	7.24388e-07	1	Selenos
Bcap31	5.74167e-11	0.252875	0.555	0.336	9.93195e-07	1	Bcap31
Tram1	5.75114e-11	0.267631	0.457	0.259	9.94832e-07	1	Tram1
Ccl9	1.07097e-10	0.328043	0.445	0.242	1.85256e-06	1	Ccl9
Pdia3	1.07403e-10	0.297631	0.899	0.615	1.85786e-06	1	Pdia3
Nr1h2	1.40166e-10	0.283512	0.347	0.178	2.4246e-06	1	Nr1h2
Tspan31	2.04986e-10	0.275903	0.417	0.233	3.54585e-06	1	Tspan31
Pdlim5	2.48005e-10	0.25318	0.298	0.142	4.28999e-06	1	Pdlim5
Gm36161	3.37952e-10	0.276647	0.426	0.238	5.84589e-06	1	Gm36161
Mapkapk2	3.58709e-10	0.250051	0.353	0.183	6.20495e-06	1	Mapkapk2
Cebpg	5.17324e-10	0.251868	0.294	0.141	8.94868e-06	1	Cebpg
Dok1	5.25632e-10	0.271765	0.383	0.201	9.09238e-06	1	Dok1
Ccm2	7.95173e-10	0.310982	0.322	0.161	1.37549e-05	1	Ccm2
Igsf6	1.43026e-09	0.250749	0.374	0.202	2.47407e-05	1	Igsf6
Hmgcl	1.73086e-09	0.259017	0.313	0.162	2.99405e-05	1	Hmgcl
Larp4b	1.80103e-09	0.263746	0.313	0.158	3.11543e-05	1	Larp4b
Cysltr1	8.31088e-09	0.283168	0.337	0.184	0.000143762	1	Cysltr1
Bach1	9.65968e-09	0.27537	0.304	0.162	0.000167093	1	Bach1
Tnfrsf1b	1.12139e-08	0.269188	0.344	0.189	0.000193978	1	Tnfrsf1b
Ccr5	6.11471e-05	0.370761	0.34	0.224	1	1	Ccr5
F11r	2.2007e-75	1.31651	0.602	0.092	3.80676e-71	2	F11r
Olfml3	9.98532e-72	1.6676	0.619	0.105	1.72726e-67	2	Olfml3
Ctss	1.04538e-70	1.35331	0.974	0.8	1.8083e-66	2	Ctss
Hexb	4.97566e-63	1.95307	0.926	0.578	8.6069e-59	2	Hexb
Tgfbr1	5.18336e-60	1.64735	0.719	0.196	8.96617e-56	2	Tgfbr1
Slamf9	4.39467e-52	1.26239	0.762	0.259	7.60191e-48	2	Slamf9
Psap	1.34077e-48	1.15214	1	0.844	2.31926e-44	2	Psap
Mafb	7.24855e-46	1.20726	0.771	0.285	1.25385e-41	2	Mafb
H2-Eb1	7.79022e-46	1.21727	0.957	0.708	1.34755e-41	2	H2-Eb1
Lair1	2.5664e-45	1.1727	0.71	0.253	4.43937e-41	2	Lair1
Cyp4f18	3.04017e-45	1.04785	0.563	0.142	5.25889e-41	2	Cyp4f18
Tmem119	1.24711e-44	1.17631	0.424	0.078	2.15725e-40	2	Tmem119
H2-Ab1	9.77989e-44	1.19184	0.965	0.696	1.69172e-39	2	H2-Ab1
Lpcat2	1.01536e-42	1.07564	0.775	0.326	1.75637e-38	2	Lpcat2
AU020206	1.84254e-41	0.770783	0.437	0.086	3.18722e-37	2	AU020206
Apobec1	4.97297e-41	1.10929	0.766	0.335	8.60225e-37	2	Apobec1
Cx3cr11	9.67336e-41	1.1491	0.879	0.452	1.6733e-36	2	Cx3cr1
Klra2	6.40913e-40	0.731409	0.429	0.086	1.10865e-35	2	Klra2
H2-Aa	1.48965e-39	1.09976	0.948	0.729	2.57679e-35	2	H2-Aa
Cd74	2.23544e-39	1.11188	0.987	0.87	3.86686e-35	2	Cd74
Cd72	6.02507e-39	1.22239	0.658	0.239	1.04222e-34	2	Cd72
Lat2	5.78848e-38	0.928643	0.576	0.178	1.00129e-33	2	Lat2
Mpeg1	5.54485e-37	0.991033	0.87	0.447	9.59149e-33	2	Mpeg1
H2-DMb1	7.90129e-35	1.02629	0.879	0.509	1.36677e-30	2	H2-DMb1
Acvrl1	2.95301e-34	0.807493	0.571	0.191	5.10811e-30	2	Acvrl1
Pmepa1	1.39346e-33	1.07583	0.407	0.096	2.4104e-29	2	Pmepa1
Plxdc2	2.70784e-33	1.09975	0.364	0.077	4.68403e-29	2	Plxdc2
Susd3	8.89249e-33	0.86187	0.584	0.209	1.53822e-28	2	Susd3
Sirpb1a	6.91707e-32	0.888384	0.342	0.069	1.19651e-27	2	Sirpb1a
Lpar6	1.44766e-31	0.80888	0.519	0.168	2.50416e-27	2	Lpar6
Ramp1	3.1731e-31	0.668064	0.584	0.208	5.48883e-27	2	Ramp1
Abi3	1.96105e-30	0.624987	0.429	0.116	3.39222e-26	2	Abi3
Psen2	2.06304e-30	0.651465	0.463	0.134	3.56865e-26	2	Psen2
Cd9	1.82434e-29	0.9993	0.45	0.135	3.15574e-25	2	Cd9
Axl	2.02113e-29	0.778737	0.792	0.378	3.49615e-25	2	Axl
Ccr2	2.22593e-29	1.10043	0.68	0.285	3.85042e-25	2	Ccr2
Cybb	2.78589e-29	0.761134	0.879	0.507	4.81903e-25	2	Cybb
Sh2d1b1	7.19032e-29	0.471865	0.268	0.043	1.24378e-24	2	Sh2d1b1
Gngt2	1.66808e-28	0.772566	0.606	0.248	2.88544e-24	2	Gngt2
Cd811	1.25212e-27	0.892722	0.896	0.615	2.16592e-23	2	Cd81
Jun	1.44567e-27	1.0916	0.662	0.298	2.50072e-23	2	Jun
Ly86	1.71156e-27	0.746251	0.944	0.695	2.96065e-23	2	Ly86
Tnfsf13b	2.08702e-27	0.561863	0.294	0.058	3.61013e-23	2	Tnfsf13b
Plbd1	3.05441e-27	0.900874	0.753	0.36	5.28352e-23	2	Plbd1
Mmp14	3.92006e-27	0.662532	0.312	0.066	6.78092e-23	2	Mmp14
H2-DMa	8.35968e-27	0.7995	0.866	0.508	1.44606e-22	2	H2-DMa
Ppfia4	3.45985e-26	0.605759	0.602	0.249	5.98484e-22	2	Ppfia4
Bcl2a1b	1.73358e-25	0.560494	0.606	0.242	2.99875e-21	2	Bcl2a1b
Tmem86a	4.52795e-25	0.783196	0.589	0.251	7.83245e-21	2	Tmem86a
Cd300c2	8.23473e-25	0.717863	0.835	0.471	1.42444e-20	2	Cd300c2
Cadm1	8.28642e-25	0.734603	0.294	0.067	1.43338e-20	2	Cadm1
Abhd15	1.7576e-24	0.451466	0.255	0.048	3.04029e-20	2	Abhd15
Csf2ra	3.31757e-24	0.699418	0.779	0.417	5.73873e-20	2	Csf2ra
Itgb5	4.61687e-24	0.736691	0.602	0.263	7.98626e-20	2	Itgb5
Sirpb1b	7.71305e-24	0.485196	0.286	0.063	1.3342e-19	2	Sirpb1b
Dock10	1.14912e-23	0.691608	0.61	0.271	1.98774e-19	2	Dock10
Fyb	1.33366e-23	0.759736	0.909	0.588	2.30697e-19	2	Fyb
Slc11a11	1.67899e-23	0.732287	0.645	0.314	2.90432e-19	2	Slc11a1
Epb41l2	2.10617e-23	0.60616	0.502	0.193	3.64325e-19	2	Epb41l2
Gpr65	1.00358e-22	0.621709	0.589	0.253	1.73599e-18	2	Gpr65
Trem2	1.16749e-22	0.811402	0.779	0.465	2.01953e-18	2	Trem2
Cd141	1.19386e-22	0.815351	0.797	0.413	2.06515e-18	2	Cd14
Coro1a	1.60876e-22	0.739257	0.87	0.543	2.78283e-18	2	Coro1a
Tlr2	1.76467e-22	0.768369	0.532	0.224	3.05252e-18	2	Tlr2
Tle1	2.00035e-22	0.468749	0.26	0.055	3.46021e-18	2	Tle1
Fam105a1	2.36204e-22	0.6804	0.701	0.369	4.08586e-18	2	Fam105a
Unc93b11	2.85852e-22	0.644824	0.978	0.748	4.94466e-18	2	Unc93b1
Vsir1	3.15217e-22	0.660479	0.784	0.431	5.45263e-18	2	Vsir
Il10ra	4.66527e-22	0.755465	0.758	0.418	8.06998e-18	2	Il10ra
Cd52	1.01029e-21	0.652678	0.896	0.665	1.7476e-17	2	Cd52
Ifnar2	5.52802e-21	0.623013	0.823	0.489	9.56237e-17	2	Ifnar2
Gatm1	5.55451e-21	0.553786	0.675	0.336	9.60818e-17	2	Gatm
Fxyd5	9.8008e-21	0.721603	0.823	0.513	1.69534e-16	2	Fxyd5
Nfe2l2	1.41369e-20	0.696689	0.684	0.366	2.4454e-16	2	Nfe2l2
Bin2	3.30698e-20	0.500991	0.45	0.168	5.72041e-16	2	Bin2
Tifab	6.60998e-20	0.561311	0.519	0.219	1.1434e-15	2	Tifab
Zfp36	8.09712e-20	1.09563	0.667	0.348	1.40064e-15	2	Zfp36
Lilra51	9.45488e-20	0.673426	0.468	0.189	1.63551e-15	2	Lilra5
Fcgr4	9.50184e-20	0.544869	0.42	0.15	1.64363e-15	2	Fcgr4
Ppcdc	1.0778e-19	0.508718	0.294	0.082	1.86438e-15	2	Ppcdc
Selplg	1.43305e-19	0.46824	0.745	0.392	2.47889e-15	2	Selplg
Ptprc	1.66678e-19	0.612358	0.818	0.492	2.8832e-15	2	Ptprc
Tmcc3	2.19605e-19	0.43154	0.476	0.189	3.79873e-15	2	Tmcc3
Ctsz	2.76346e-19	0.59099	0.905	0.631	4.78024e-15	2	Ctsz
Junb	2.79386e-19	1.03552	0.632	0.326	4.83282e-15	2	Junb
Itgav	3.97007e-19	0.69205	0.325	0.103	6.86744e-15	2	Itgav
Hck	9.27778e-19	0.52037	0.662	0.343	1.60487e-14	2	Hck
Cxcl16	9.90111e-19	0.55132	0.823	0.481	1.71269e-14	2	Cxcl16
Ssh2	1.13988e-18	0.620018	0.636	0.323	1.97176e-14	2	Ssh2
Itgb2	1.20735e-18	0.5424	0.658	0.346	2.08847e-14	2	Itgb2
Laptm5	1.33624e-18	0.517474	0.944	0.784	2.31143e-14	2	Laptm5
Slamf7	2.43641e-18	0.468978	0.455	0.179	4.2145e-14	2	Slamf7
B3gnt8	2.54216e-18	0.450715	0.368	0.13	4.39742e-14	2	B3gnt8
Itga6	3.98358e-18	0.610833	0.351	0.12	6.8908e-14	2	Itga6
Pold4	4.2278e-18	0.490039	0.528	0.244	7.31324e-14	2	Pold4
Fmnl3	4.48945e-18	0.498341	0.255	0.067	7.76585e-14	2	Fmnl3
Camk1d	4.94095e-18	0.380948	0.541	0.244	8.54685e-14	2	Camk1d
Ctsh	4.95013e-18	0.542076	0.922	0.667	8.56274e-14	2	Ctsh
Cysltr11	7.39559e-18	0.491496	0.442	0.174	1.27929e-13	2	Cysltr1
Irf8	9.61123e-18	0.425422	0.719	0.389	1.66255e-13	2	Irf8
Ifnar1	9.63264e-18	0.762487	0.567	0.277	1.66625e-13	2	Ifnar1
Ms4a4c	9.66344e-18	0.315569	0.416	0.153	1.67158e-13	2	Ms4a4c
Irf5	1.23885e-17	0.520301	0.714	0.389	2.14296e-13	2	Irf5
Slc29a3	1.52324e-17	0.562159	0.528	0.25	2.6349e-13	2	Slc29a3
Ifngr11	1.57501e-17	0.582674	0.866	0.546	2.72445e-13	2	Ifngr1
Tagap	2.08868e-17	0.487431	0.277	0.08	3.61299e-13	2	Tagap
Cd84	3.62808e-17	0.517117	0.567	0.258	6.27585e-13	2	Cd84
Pld41	4.63694e-17	0.528528	0.922	0.633	8.02098e-13	2	Pld4
C3ar11	6.05978e-17	0.492618	0.766	0.432	1.04822e-12	2	C3ar1
Ccr51	8.00546e-17	0.504786	0.472	0.206	1.38478e-12	2	Ccr5
Itm2c	8.02207e-17	0.569538	0.823	0.523	1.38766e-12	2	Itm2c
Skil	9.56969e-17	0.577012	0.368	0.139	1.65536e-12	2	Skil
Runx3	1.81483e-16	0.530616	0.32	0.113	3.1393e-12	2	Runx3
Fes	2.00352e-16	0.411648	0.671	0.359	3.46568e-12	2	Fes
Fam129a	2.06933e-16	0.685791	0.494	0.232	3.57953e-12	2	Fam129a
Scimp	2.65962e-16	0.519763	0.381	0.147	4.6006e-12	2	Scimp
Gns	4.25447e-16	0.529116	0.688	0.378	7.35939e-12	2	Gns
Sema4d	5.41145e-16	0.463787	0.368	0.137	9.36072e-12	2	Sema4d
P2ry61	6.97986e-16	0.562971	0.866	0.512	1.20738e-11	2	P2ry6
Rhob1	1.1694e-15	0.533621	0.567	0.292	2.02283e-11	2	Rhob
Pou2f2	1.37206e-15	0.39307	0.606	0.31	2.37339e-11	2	Pou2f2
Tcirg1	1.45414e-15	0.441218	0.563	0.286	2.51538e-11	2	Tcirg1
Ncf4	1.46964e-15	0.308753	0.545	0.254	2.54218e-11	2	Ncf4
Dusp6	2.17042e-15	0.617837	0.433	0.187	3.7544e-11	2	Dusp6
Rcbtb2	4.44143e-15	0.415448	0.403	0.166	7.68278e-11	2	Rcbtb2
Inpp5d	5.11272e-15	0.393194	0.658	0.367	8.84398e-11	2	Inpp5d
Ptpre	5.56231e-15	0.275072	0.628	0.32	9.62168e-11	2	Ptpre
Siglece1	6.2707e-15	0.534838	0.502	0.239	1.08471e-10	2	Siglece
Tmem50b	6.68527e-15	0.365259	0.372	0.15	1.15642e-10	2	Tmem50b
Clec12a	8.54484e-15	0.474653	0.723	0.433	1.47809e-10	2	Clec12a
Apbb1ip	9.66974e-15	0.363871	0.688	0.396	1.67267e-10	2	Apbb1ip
Il1b	1.26341e-14	0.938548	0.277	0.092	2.18544e-10	2	Il1b
Rgs2	1.327e-14	0.423111	0.455	0.211	2.29545e-10	2	Rgs2
Arhgap45	1.37598e-14	0.431835	0.788	0.473	2.38016e-10	2	Arhgap45
Gm5086	1.64268e-14	0.364976	0.312	0.109	2.84151e-10	2	Gm5086
Fuca2	1.67869e-14	0.251354	0.372	0.147	2.90379e-10	2	Fuca2
Extl3	1.78303e-14	0.495132	0.255	0.081	3.08428e-10	2	Extl3
Shisa5	1.85788e-14	0.508649	0.753	0.443	3.21377e-10	2	Shisa5
Dok31	2.34663e-14	0.362852	0.532	0.257	4.0592e-10	2	Dok3
Tspan32	2.53595e-14	0.453144	0.303	0.11	4.38668e-10	2	Tspan32
Bmyc	2.90912e-14	0.328566	0.619	0.342	5.03219e-10	2	Bmyc
Vav1	3.38888e-14	0.431358	0.537	0.271	5.86209e-10	2	Vav1
Mef2a	4.11289e-14	0.42714	0.623	0.356	7.11448e-10	2	Mef2a
Calhm2	5.02499e-14	0.407947	0.368	0.148	8.69222e-10	2	Calhm2
Nfkbiz	6.469e-14	0.775518	0.26	0.084	1.11901e-09	2	Nfkbiz
Pilra	1.0911e-13	0.501589	0.325	0.125	1.88738e-09	2	Pilra
B4galnt1	1.24763e-13	0.390598	0.342	0.135	2.15814e-09	2	B4galnt1
Fos	1.34592e-13	0.962227	0.45	0.21	2.32818e-09	2	Fos
Plekhf2	2.01394e-13	0.36777	0.359	0.148	3.48371e-09	2	Plekhf2
Gm2a	2.15509e-13	0.366588	0.68	0.41	3.72787e-09	2	Gm2a
Elmo1	2.18092e-13	0.315489	0.472	0.221	3.77256e-09	2	Elmo1
Rtcb	2.26443e-13	0.427061	0.55	0.314	3.91702e-09	2	Rtcb
Rnase6	2.84329e-13	0.426928	0.325	0.125	4.91832e-09	2	Rnase6
Ncf1	3.61874e-13	0.374138	0.597	0.328	6.25969e-09	2	Ncf1
Klhl6	3.74392e-13	0.319091	0.39	0.172	6.47623e-09	2	Klhl6
Tmem176a	3.90662e-13	0.466858	0.896	0.699	6.75767e-09	2	Tmem176a
Dnajb14	4.05222e-13	0.418782	0.468	0.231	7.00953e-09	2	Dnajb14
BC017643	4.28844e-13	0.328163	0.407	0.184	7.41814e-09	2	BC017643
Lyn	4.61854e-13	0.359017	0.779	0.473	7.98915e-09	2	Lyn
Phf11b	4.74526e-13	0.299155	0.45	0.208	8.20835e-09	2	Phf11b
Ciita	8.20193e-13	0.421321	0.429	0.204	1.41877e-08	2	Ciita
Ugt1a7c	8.49609e-13	0.405478	0.364	0.153	1.46965e-08	2	Ugt1a7c
Gpr341	9.05626e-13	0.524818	0.554	0.289	1.56655e-08	2	Gpr34
Tm6sf1	1.80624e-12	0.362758	0.628	0.348	3.12444e-08	2	Tm6sf1
Tor3a	2.09641e-12	0.279003	0.403	0.18	3.62637e-08	2	Tor3a
Macf1	2.74018e-12	0.552129	0.528	0.285	4.73997e-08	2	Macf1
Stk10	2.87314e-12	0.422188	0.333	0.139	4.96995e-08	2	Stk10
Slamf8	3.10387e-12	0.324569	0.294	0.111	5.36908e-08	2	Slamf8
Mbnl2	3.20298e-12	0.445741	0.468	0.242	5.54052e-08	2	Mbnl2
Btg2	3.61224e-12	0.614446	0.597	0.327	6.24845e-08	2	Btg2
Tmem176b	3.70556e-12	0.38901	0.935	0.82	6.40988e-08	2	Tmem176b
Ppt1	4.02226e-12	0.336618	0.593	0.331	6.95771e-08	2	Ppt1
Basp1	4.65813e-12	0.509273	0.394	0.18	8.05763e-08	2	Basp1
Igsf8	6.41488e-12	0.436521	0.416	0.206	1.10965e-07	2	Igsf8
Lrrc251	7.12166e-12	0.370536	0.719	0.428	1.2319e-07	2	Lrrc25
Fmnl1	9.25019e-12	0.291253	0.619	0.339	1.6001e-07	2	Fmnl1
Rps6ka1	1.1725e-11	0.311934	0.563	0.311	2.02819e-07	2	Rps6ka1
Scarb2	1.32392e-11	0.309083	0.545	0.302	2.29012e-07	2	Scarb2
Plxna4os1	1.37737e-11	0.327088	0.273	0.102	2.38257e-07	2	Plxna4os1
Tgfb1	1.44936e-11	0.38213	0.671	0.405	2.5071e-07	2	Tgfb1
Prkcd	1.53017e-11	0.320989	0.745	0.456	2.64689e-07	2	Prkcd
Evl	1.53687e-11	0.264192	0.45	0.221	2.65848e-07	2	Evl
Cd481	1.56172e-11	0.34831	0.71	0.428	2.70145e-07	2	Cd48
Camk2d	2.29463e-11	0.287504	0.416	0.196	3.96925e-07	2	Camk2d
Cebpa1	2.32538e-11	0.32338	0.411	0.201	4.02244e-07	2	Cebpa
Plcg2	2.45496e-11	0.335704	0.351	0.16	4.24658e-07	2	Plcg2
Ppt2	2.60083e-11	0.365291	0.364	0.167	4.49891e-07	2	Ppt2
Esyt1	3.01912e-11	0.366224	0.364	0.173	5.22247e-07	2	Esyt1
BC028528	3.02026e-11	0.405064	0.433	0.221	5.22444e-07	2	BC028528
Fam49b	3.02087e-11	0.315288	0.714	0.447	5.22549e-07	2	Fam49b
Dapp1	3.36e-11	0.262261	0.407	0.194	5.81213e-07	2	Dapp1
Dgkz	3.47387e-11	0.451053	0.416	0.207	6.0091e-07	2	Dgkz
Milr1	3.6756e-11	0.279403	0.42	0.211	6.35805e-07	2	Milr1
Mapkapk3	3.75081e-11	0.253876	0.251	0.093	6.48815e-07	2	Mapkapk3
Igsf61	4.01178e-11	0.327859	0.42	0.208	6.93957e-07	2	Igsf6
2021-03-01	4.49188e-11	0.579012	0.364	0.173	7.77005e-07	2	2021-03-01
Ccdc12	4.55911e-11	0.3216	0.645	0.389	7.88635e-07	2	Ccdc12
Ier5	4.73883e-11	0.317557	0.502	0.266	8.19724e-07	2	Ier5
Cotl1	4.77505e-11	0.387465	0.766	0.493	8.25988e-07	2	Cotl1
Lcp2	5.81018e-11	0.350331	0.498	0.272	1.00504e-06	2	Lcp2
Clec5a	8.38539e-11	0.393075	0.281	0.116	1.4505e-06	2	Clec5a
Tmbim1	8.96256e-11	0.472883	0.359	0.172	1.55034e-06	2	Tmbim1
Efhd2	9.69397e-11	0.363124	0.74	0.488	1.67686e-06	2	Efhd2
Retreg1	9.70549e-11	0.326599	0.372	0.174	1.67886e-06	2	Retreg1
Il161	1.07504e-10	0.306618	0.472	0.243	1.85961e-06	2	Il16
Gsn	1.09182e-10	0.376731	0.597	0.345	1.88863e-06	2	Gsn
Soat1	1.3783e-10	0.374939	0.377	0.181	2.38419e-06	2	Soat1
Irak2	1.4151e-10	0.402691	0.316	0.139	2.44784e-06	2	Irak2
Gpi1	1.41745e-10	0.341806	0.792	0.535	2.4519e-06	2	Gpi1
Arl6ip5	1.83979e-10	0.329626	0.528	0.305	3.18247e-06	2	Arl6ip5
Chd9	1.97336e-10	0.271421	0.693	0.443	3.41351e-06	2	Chd9
Plekho1	1.98628e-10	0.284867	0.628	0.384	3.43586e-06	2	Plekho1
Rrbp1	2.09665e-10	0.37561	0.84	0.571	3.62679e-06	2	Rrbp1
Cmtm7	2.23033e-10	0.266191	0.792	0.51	3.85802e-06	2	Cmtm7
Pfkfb4	2.37781e-10	0.250804	0.359	0.168	4.11313e-06	2	Pfkfb4
Tgif1	2.6415e-10	0.386554	0.377	0.184	4.56927e-06	2	Tgif1
Fermt3	2.74264e-10	0.319906	0.68	0.431	4.74422e-06	2	Fermt3
Dcakd	3.18416e-10	0.263978	0.325	0.145	5.50797e-06	2	Dcakd
Lipa1	4.06376e-10	0.448022	0.567	0.334	7.0295e-06	2	Lipa
St3gal61	4.42794e-10	0.475398	0.455	0.24	7.65945e-06	2	St3gal6
Svbp	4.94888e-10	0.270271	0.455	0.25	8.56057e-06	2	Svbp
Mtdh	4.96736e-10	0.276208	0.688	0.422	8.59254e-06	2	Mtdh
Gmip	5.04146e-10	0.347972	0.433	0.229	8.72072e-06	2	Gmip
Asph	5.514e-10	0.322946	0.251	0.099	9.53812e-06	2	Asph
Ubc	5.55516e-10	0.381754	0.879	0.63	9.60932e-06	2	Ubc
Acer3	6.28238e-10	0.420005	0.407	0.214	1.08673e-05	2	Acer3
Daglb	6.80035e-10	0.360095	0.485	0.272	1.17633e-05	2	Daglb
Eef2	7.77347e-10	0.324658	0.909	0.743	1.34466e-05	2	Eef2
Gusb	7.92641e-10	0.323898	0.662	0.426	1.37111e-05	2	Gusb
Twf2	8.26813e-10	0.274901	0.593	0.355	1.43022e-05	2	Twf2
Tgfbi1	9.07356e-10	0.422822	0.818	0.544	1.56954e-05	2	Tgfbi
Herpud1	9.91151e-10	0.498698	0.532	0.315	1.71449e-05	2	Herpud1
Ntpcr	1.05132e-09	0.254235	0.675	0.421	1.81857e-05	2	Ntpcr
Ly9	1.14567e-09	0.367144	0.299	0.135	1.98179e-05	2	Ly9
Pla2g151	1.43586e-09	0.305179	0.554	0.322	2.48376e-05	2	Pla2g15
Myo1f	1.46005e-09	0.289655	0.55	0.314	2.5256e-05	2	Myo1f
Snx18	1.52091e-09	0.350575	0.351	0.17	2.63086e-05	2	Snx18
Mfsd10	1.53997e-09	0.314657	0.294	0.134	2.66385e-05	2	Mfsd10
Sp100	1.71856e-09	0.30683	0.524	0.296	2.97276e-05	2	Sp100
Creb5	1.76788e-09	0.374178	0.251	0.103	3.05808e-05	2	Creb5
Mapk14	1.93452e-09	0.343112	0.433	0.228	3.34633e-05	2	Mapk14
Sap30	2.25082e-09	0.25591	0.342	0.165	3.89347e-05	2	Sap30
Ier2	2.67281e-09	0.64853	0.446	0.245	4.62342e-05	2	Ier2
Gng10	2.72034e-09	0.265862	0.42	0.226	4.70565e-05	2	Gng10
Cd180	2.8286e-09	0.345455	0.368	0.186	4.89292e-05	2	Cd180
Asah11	2.85334e-09	0.333169	0.81	0.532	4.93571e-05	2	Asah1
Zfhx31	2.89303e-09	0.332591	0.532	0.316	5.00436e-05	2	Zfhx3
Sipa1	2.96721e-09	0.297677	0.485	0.274	5.13268e-05	2	Sipa1
Gpr1831	3.16726e-09	0.253577	0.472	0.258	5.47872e-05	2	Gpr183
Tkt	3.19768e-09	0.258805	0.645	0.388	5.53135e-05	2	Tkt
Bcap311	3.24134e-09	0.310459	0.576	0.352	5.60687e-05	2	Bcap31
Tmem1731	3.5172e-09	0.348441	0.476	0.269	6.08405e-05	2	Tmem173
Acsl1	3.7077e-09	0.4992	0.273	0.122	6.41357e-05	2	Acsl1
Rpl10a	4.46049e-09	0.353384	0.922	0.769	7.71575e-05	2	Rpl10a
Cttnbp2nl	4.72396e-09	0.327182	0.472	0.267	8.1715e-05	2	Cttnbp2nl
Csk	4.76373e-09	0.285761	0.571	0.35	8.24029e-05	2	Csk
Arhgap25	4.85048e-09	0.328995	0.303	0.145	8.39037e-05	2	Arhgap25
Man2b1	5.53183e-09	0.385406	0.866	0.614	9.56896e-05	2	Man2b1
Clec4b1	5.59958e-09	0.274064	0.463	0.254	9.68616e-05	2	Clec4b1
Ddost	5.93218e-09	0.282162	0.68	0.431	0.000102615	2	Ddost
Lgmn1	6.7048e-09	0.426514	0.909	0.711	0.00011598	2	Lgmn
Arl10	7.35268e-09	0.36677	0.338	0.168	0.000127187	2	Arl10
2810474O19Rik	7.7849e-09	0.348922	0.394	0.212	0.000134663	2	2810474O19Rik
Lgals3bp	8.06807e-09	0.262202	0.602	0.365	0.000139562	2	Lgals3bp
2021-03-02	8.20363e-09	0.343128	0.472	0.27	0.000141906	2	2021-03-02
Smim14	9.32059e-09	0.251776	0.567	0.349	0.000161228	2	Smim14
Chst12	9.75913e-09	0.266573	0.346	0.175	0.000168814	2	Chst12
Wsb1	1.02663e-08	0.388022	0.39	0.212	0.000177586	2	Wsb1
Adgre5	1.11598e-08	0.611467	0.273	0.127	0.000193043	2	Adgre5
Slc15a4	1.1933e-08	0.347293	0.338	0.173	0.000206416	2	Slc15a4
Arhgap17	1.46523e-08	0.310762	0.455	0.256	0.000253456	2	Arhgap17
Peli1	1.4975e-08	0.396894	0.411	0.233	0.000259038	2	Peli1
Adcy7	1.60255e-08	0.315362	0.39	0.202	0.000277209	2	Adcy7
Psen1	1.61024e-08	0.393485	0.286	0.137	0.000278539	2	Psen1
Tspan13	1.61888e-08	0.344958	0.281	0.135	0.000280035	2	Tspan13
Serinc1	2.1013e-08	0.350167	0.459	0.269	0.000363483	2	Serinc1
Rnf167	4.03349e-08	0.294003	0.329	0.17	0.000697713	2	Rnf167
Fgd2	5.28623e-08	0.255302	0.524	0.33	0.000914413	2	Fgd2
Plekho2	5.92768e-08	0.30721	0.385	0.212	0.00102537	2	Plekho2
Cebpg1	6.44209e-08	0.401661	0.303	0.153	0.00111435	2	Cebpg
Dnajc3	9.18069e-08	0.260968	0.537	0.337	0.00158808	2	Dnajc3
Ctsc1	1.56932e-07	0.314694	0.926	0.732	0.00271461	2	Ctsc
Ms4a6c1	1.67609e-07	0.302523	0.87	0.603	0.0028993	2	Ms4a6c
Fgl2	1.92484e-07	0.286504	0.342	0.178	0.00332958	2	Fgl2
H2-D1	1.93371e-07	0.258806	0.987	0.849	0.00334492	2	H2-D1
Snx1	1.99086e-07	0.260014	0.476	0.287	0.00344378	2	Snx1
Lrp11	2.00494e-07	0.28567	0.537	0.342	0.00346814	2	Lrp1
Dynll1	2.15686e-07	0.269411	0.684	0.452	0.00373094	2	Dynll1
Cyp27a1	2.33223e-07	0.290247	0.359	0.194	0.0040343	2	Cyp27a1
Adam17	2.48127e-07	0.333588	0.325	0.171	0.0042921	2	Adam17
C1qb1	2.54163e-07	0.297471	0.978	0.854	0.00439652	2	C1qb
Neurl3	3.02143e-07	0.267373	0.381	0.214	0.00522646	2	Neurl3
Cnppd1	3.06133e-07	0.301774	0.355	0.204	0.00529548	2	Cnppd1
Cd82	3.59251e-07	0.274598	0.307	0.161	0.00621433	2	Cd82
Tnrc18	5.44629e-07	0.268616	0.294	0.158	0.00942099	2	Tnrc18
Ms4a7	5.47053e-07	0.457311	0.887	0.641	0.00946293	2	Ms4a7
Cd83	5.60808e-07	0.42725	0.407	0.236	0.00970085	2	Cd83
Ctsa1	6.59345e-07	0.266331	0.874	0.645	0.0114053	2	Ctsa
Gm34084	7.12639e-07	0.347333	0.433	0.27	0.0123272	2	Gm34084
Hsp90b11	7.31905e-07	0.414558	0.87	0.636	0.0126605	2	Hsp90b1
Cebpzos	8.01559e-07	0.262656	0.333	0.187	0.0138654	2	Cebpzos
Prpf38b	8.54824e-07	0.287079	0.394	0.23	0.0147867	2	Prpf38b
Ckb	8.88891e-07	0.287907	0.788	0.556	0.015376	2	Ckb
Ucp2	9.12587e-07	0.258274	0.905	0.76	0.0157859	2	Ucp2
Themis2	1.01678e-06	0.290081	0.377	0.22	0.0175882	2	Themis2
Hsd17b11	1.023e-06	0.328294	0.277	0.146	0.0176959	2	Hsd17b11
Adrb21	1.11673e-06	0.270641	0.351	0.203	0.0193172	2	Adrb2
Lnpep	2.07784e-06	0.279396	0.407	0.253	0.0359424	2	Lnpep
Apoe2	2.35216e-06	0.434389	0.974	0.867	0.0406877	2	Apoe
Tbc1d9	2.89349e-06	0.250783	0.264	0.136	0.0500516	2	Tbc1d9
Adam10	3.79625e-06	0.254132	0.325	0.185	0.0656675	2	Adam10
Smc1a	4.11849e-06	0.337585	0.385	0.236	0.0712416	2	Smc1a
Pdia31	5.35409e-06	0.30088	0.87	0.648	0.092615	2	Pdia3
Elovl1	6.38853e-06	0.317326	0.342	0.211	0.110509	2	Elovl1
P2ry121	7.01613e-06	0.346718	0.377	0.231	0.121365	2	P2ry12
Zmiz1	7.108e-06	0.298584	0.437	0.275	0.122954	2	Zmiz1
Ppid	8.98299e-06	0.287452	0.251	0.135	0.155388	2	Ppid
Pid1	1.98282e-05	0.278076	0.675	0.469	0.342988	2	Pid1
Eed	2.1203e-05	0.313259	0.268	0.152	0.366769	2	Eed
Prkcb	2.20117e-05	0.256064	0.325	0.191	0.380758	2	Prkcb
Ggnbp2	2.95393e-05	0.271896	0.377	0.237	0.510971	2	Ggnbp2
Snx10	3.54438e-05	0.382599	0.364	0.239	0.613107	2	Snx10
Baz2b	3.63954e-05	0.318155	0.307	0.186	0.629567	2	Baz2b
Tra2a	4.08254e-05	0.275998	0.42	0.277	0.706197	2	Tra2a
Susd6	5.27057e-05	0.282486	0.268	0.155	0.911704	2	Susd6
Pnrc2	5.35743e-05	0.27263	0.286	0.171	0.926728	2	Pnrc2
Eif2ak2	0.000143595	0.275809	0.264	0.155	1	2	Eif2ak2
Hook3	0.00176589	0.316286	0.294	0.2	1	2	Hook3
Napsa	1.41412e-64	1.58607	0.54	0.069	2.44614e-60	3	Napsa
S100a6	2.70795e-61	2.67234	0.675	0.159	4.6842e-57	3	S100a6
Capg	2.81146e-50	1.64716	0.607	0.134	4.86326e-46	3	Capg
S100a4	1.71087e-49	1.18144	0.46	0.064	2.95946e-45	3	S100a4
Lgals3	5.05773e-43	1.54255	0.663	0.199	8.74886e-39	3	Lgals3
Fgr	5.46885e-43	0.960773	0.362	0.041	9.46002e-39	3	Fgr
Vim	1.69595e-38	1.67369	0.791	0.359	2.93365e-34	3	Vim
Tnip3	1.78386e-37	0.948303	0.27	0.024	3.08572e-33	3	Tnip3
Ccr21	1.48249e-36	1.38163	0.779	0.294	2.56441e-32	3	Ccr2
Alcam	1.52191e-34	0.931915	0.411	0.076	2.6326e-30	3	Alcam
Dna2	2.94895e-34	1.27552	0.288	0.034	5.1011e-30	3	Dna2
Olfm1	3.15242e-34	0.761355	0.356	0.056	5.45305e-30	3	Olfm1
Lsp1	5.02358e-34	1.09039	0.724	0.27	8.68979e-30	3	Lsp1
Plbd11	3.09475e-30	1.24176	0.773	0.381	5.35329e-26	3	Plbd1
Tmsb10	1.11923e-28	1.52151	0.822	0.554	1.93604e-24	3	Tmsb10
Slamf71	4.40785e-28	0.979095	0.571	0.179	7.62471e-24	3	Slamf7
Fxyd51	1.53535e-27	1.13752	0.859	0.527	2.65585e-23	3	Fxyd5
Coro2a	4.83003e-26	0.69719	0.252	0.036	8.35498e-22	3	Coro2a
Flna	1.65635e-25	1.09231	0.656	0.266	2.86515e-21	3	Flna
Crip1	5.46391e-24	1.27054	0.785	0.493	9.45148e-20	3	Crip1
Kcnn4	8.30614e-24	0.72348	0.325	0.069	1.4368e-19	3	Kcnn4
Naaa	2.52601e-22	1.25531	0.509	0.188	4.36948e-18	3	Naaa
Jarid2	4.34679e-22	0.847111	0.405	0.112	7.51908e-18	3	Jarid2
S100a10	1.5287e-21	0.90751	0.583	0.241	2.64435e-17	3	S100a10
H2afy	1.76465e-21	1.11318	0.601	0.241	3.05249e-17	3	H2afy
Anxa1	1.79032e-21	0.58388	0.337	0.08	3.09689e-17	3	Anxa1
Sirpb1a1	2.93133e-21	0.578052	0.35	0.085	5.07062e-17	3	Sirpb1a
Ccl91	4.1404e-20	0.906196	0.595	0.25	7.16207e-16	3	Ccl9
Anxa2	9.43321e-20	0.656711	0.564	0.22	1.63176e-15	3	Anxa2
Ciita1	9.64483e-20	1.10642	0.534	0.202	1.66836e-15	3	Ciita
Elmo2	6.94646e-19	0.763496	0.337	0.091	1.2016e-14	3	Elmo2
Csf2ra1	8.65973e-19	0.957186	0.798	0.437	1.49796e-14	3	Csf2ra
Slamf91	1.32052e-18	0.788585	0.656	0.306	2.28423e-14	3	Slamf9
Rnase61	1.48427e-18	0.855256	0.393	0.127	2.56748e-14	3	Rnase6
Acer31	2.1055e-18	0.795974	0.534	0.207	3.6421e-14	3	Acer3
Sema4d1	2.44567e-18	0.669195	0.429	0.143	4.23053e-14	3	Sema4d
Ahnak1	2.98495e-18	0.954897	0.73	0.399	5.16337e-14	3	Ahnak
Ms4a4c1	5.24857e-18	1.3426	0.442	0.165	9.07898e-14	3	Ms4a4c
Gpr132	5.48692e-18	0.413972	0.374	0.107	9.49128e-14	3	Gpr132
Zyx	1.0901e-17	0.964532	0.65	0.327	1.88566e-13	3	Zyx
Slfn1	1.58725e-17	0.680097	0.27	0.065	2.74563e-13	3	Slfn1
Cers6	5.39095e-17	0.901879	0.294	0.078	9.32526e-13	3	Cers6
Nupr1	9.07424e-17	0.457854	0.331	0.094	1.56966e-12	3	Nupr1
Emb	1.18866e-16	0.914871	0.466	0.183	2.05615e-12	3	Emb
Cbfa2t3	1.4281e-16	1.47934	0.399	0.139	2.47033e-12	3	Cbfa2t3
Actg1	1.43125e-16	0.546505	0.859	0.784	2.47577e-12	3	Actg1
Ptprc1	2.02397e-16	1.01234	0.847	0.508	3.50106e-12	3	Ptprc
S100a11	2.94617e-16	0.652511	0.613	0.305	5.09628e-12	3	S100a11
Rin3	3.538e-16	0.947346	0.374	0.122	6.12003e-12	3	Rin3
Cdkn1a	6.34194e-16	0.935104	0.344	0.107	1.09703e-11	3	Cdkn1a
Sirpb1b1	6.85764e-16	0.444021	0.288	0.077	1.18624e-11	3	Sirpb1b
Slamf81	1.11478e-15	0.657829	0.35	0.114	1.92834e-11	3	Slamf8
Cd521	1.31627e-15	0.944341	0.804	0.693	2.27688e-11	3	Cd52
Myadm	1.64475e-15	0.63686	0.442	0.166	2.84509e-11	3	Myadm
Cd44	1.89456e-15	0.75272	0.344	0.11	3.27722e-11	3	Cd44
Pfkp	2.70726e-15	0.685163	0.294	0.083	4.68302e-11	3	Pfkp
Slc1a5	3.76296e-15	0.707864	0.282	0.078	6.50916e-11	3	Slc1a5
Pim1	4.38888e-15	0.804343	0.337	0.11	7.59188e-11	3	Pim1
Daxx	5.9168e-15	0.940984	0.337	0.112	1.02349e-10	3	Daxx
Phf11b1	1.11456e-14	0.910946	0.503	0.215	1.92797e-10	3	Phf11b
Irf51	1.63607e-14	0.698976	0.718	0.409	2.83008e-10	3	Irf5
Slc38a1	3.67982e-14	0.751269	0.337	0.112	6.36536e-10	3	Slc38a1
Il2rg	4.95898e-14	0.754895	0.485	0.209	8.57804e-10	3	Il2rg
Coro1a1	6.20727e-14	0.765707	0.785	0.576	1.07373e-09	3	Coro1a
Ifi209	8.16783e-14	1.03017	0.331	0.117	1.41287e-09	3	Ifi209
Prkcd1	8.24619e-14	0.810161	0.785	0.468	1.42643e-09	3	Prkcd
Mcm6	8.46954e-14	0.748823	0.301	0.096	1.46506e-09	3	Mcm6
Rab7b	8.94512e-14	0.487902	0.454	0.183	1.54733e-09	3	Rab7b
Tubb6	1.11918e-13	0.369947	0.344	0.115	1.93596e-09	3	Tubb6
Emilin2	1.27484e-13	0.311159	0.276	0.079	2.20522e-09	3	Emilin2
H13	1.27862e-13	0.589732	0.607	0.298	2.21176e-09	3	H13
Pid11	1.47673e-13	0.686648	0.798	0.463	2.55445e-09	3	Pid1
Tap1	1.52398e-13	0.908849	0.54	0.26	2.63619e-09	3	Tap1
Iqgap1	2.04985e-13	0.720745	0.748	0.431	3.54583e-09	3	Iqgap1
Klra21	2.05615e-13	0.343752	0.35	0.119	3.55673e-09	3	Klra2
Nmi	2.23922e-13	0.494088	0.35	0.122	3.87341e-09	3	Nmi
Atic	2.26027e-13	0.394113	0.362	0.126	3.90982e-09	3	Atic
Pirb	2.97319e-13	0.644893	0.607	0.303	5.14303e-09	3	Pirb
Mcub	3.45627e-13	0.500155	0.515	0.239	5.97865e-09	3	Mcub
B4galnt11	3.48027e-13	0.464812	0.387	0.141	6.02018e-09	3	B4galnt1
Myo1g	3.52769e-13	0.600458	0.429	0.171	6.1022e-09	3	Myo1g
Runx31	4.905e-13	0.504691	0.35	0.122	8.48466e-09	3	Runx3
Themis21	6.24634e-13	0.517392	0.491	0.213	1.08049e-08	3	Themis2
Gng101	6.48875e-13	0.384841	0.509	0.225	1.12242e-08	3	Gng10
Nme21	6.6527e-13	0.441253	0.693	0.399	1.15078e-08	3	Nme2
Cybb1	6.7198e-13	0.768401	0.81	0.54	1.16239e-08	3	Cybb
Srsf7	9.51835e-13	0.558074	0.656	0.343	1.64648e-08	3	Srsf7
Gsn1	1.05212e-12	0.528467	0.656	0.352	1.81996e-08	3	Gsn
Lilr4b	1.12437e-12	0.658577	0.307	0.103	1.94494e-08	3	Lilr4b
Cycs	1.41341e-12	0.53255	0.589	0.303	2.44492e-08	3	Cycs
Icam1	1.44852e-12	0.950569	0.368	0.139	2.50566e-08	3	Icam1
Ddx39	1.57554e-12	0.416498	0.38	0.141	2.72537e-08	3	Ddx39
Clec4b11	2.00738e-12	0.888428	0.503	0.261	3.47236e-08	3	Clec4b1
Twf21	2.3881e-12	0.587276	0.65	0.361	4.13093e-08	3	Twf2
Tpm4	2.97195e-12	0.577791	0.589	0.309	5.14088e-08	3	Tpm4
Gm47283	3.27738e-12	0.627099	0.252	0.074	5.66921e-08	3	Gm47283
Tgtp2	3.39488e-12	0.549072	0.313	0.11	5.87246e-08	3	Tgtp2
Phf11d	4.07264e-12	0.902775	0.331	0.13	7.04485e-08	3	Phf11d
Glipr1	4.7346e-12	0.422755	0.374	0.144	8.18992e-08	3	Glipr1
Limd1	4.80223e-12	0.587483	0.393	0.158	8.3069e-08	3	Limd1
Cytip	4.84178e-12	0.359774	0.337	0.122	8.37531e-08	3	Cytip
Fam111a	5.90183e-12	0.549813	0.521	0.242	1.0209e-07	3	Fam111a
Siva1	6.22063e-12	0.351393	0.454	0.195	1.07604e-07	3	Siva1
Actr3	1.04883e-11	0.586819	0.84	0.695	1.81427e-07	3	Actr3
Plcg21	1.22488e-11	0.719621	0.399	0.165	2.1188e-07	3	Plcg2
Selplg1	1.44184e-11	0.430043	0.724	0.417	2.4941e-07	3	Selplg
Rbm3	1.76664e-11	0.500721	0.736	0.464	3.05594e-07	3	Rbm3
Plec	1.79595e-11	0.767259	0.258	0.084	3.10664e-07	3	Plec
Psap1	1.9274e-11	0.571972	0.969	0.858	3.33402e-07	3	Psap
Stat2	2.17985e-11	0.692111	0.362	0.144	3.77071e-07	3	Stat2
Adgre51	2.18506e-11	0.474219	0.337	0.126	3.77971e-07	3	Adgre5
Ccdc88a	2.19138e-11	1.05554	0.479	0.223	3.79065e-07	3	Ccdc88a
Sp1001	2.3688e-11	0.738243	0.564	0.304	4.09756e-07	3	Sp100
Zbp1	2.64455e-11	0.793121	0.362	0.154	4.57454e-07	3	Zbp1
H2-Ab11	2.68273e-11	0.599618	0.908	0.721	4.64059e-07	3	H2-Ab1
Edem1	3.21019e-11	0.535287	0.411	0.174	5.55298e-07	3	Edem1
Fgl21	3.32516e-11	0.765754	0.399	0.18	5.75186e-07	3	Fgl2
Tra2b	3.51636e-11	0.581458	0.564	0.286	6.0826e-07	3	Tra2b
Fam26f	3.65875e-11	0.921276	0.282	0.1	6.32891e-07	3	Fam26f
Wdr43	6.0571e-11	0.346586	0.252	0.079	1.04776e-06	3	Wdr43
Dennd1b	7.11296e-11	0.830526	0.258	0.086	1.2304e-06	3	Dennd1b
Lat21	8.44588e-11	0.358949	0.472	0.218	1.46097e-06	3	Lat2
H2-DMb11	8.46779e-11	0.59075	0.804	0.543	1.46476e-06	3	H2-DMb1
1700025G04Rik	1.07695e-10	0.430706	0.294	0.108	1.86291e-06	3	1700025G04Rik
Snx20	1.16304e-10	0.704175	0.558	0.29	2.01183e-06	3	Snx20
Tomm40	1.32522e-10	0.59334	0.319	0.122	2.29236e-06	3	Tomm40
Tkt1	1.49617e-10	0.503858	0.663	0.401	2.58808e-06	3	Tkt
Stat1	1.60654e-10	0.860167	0.546	0.291	2.779e-06	3	Stat1
Creb51	1.62062e-10	0.588793	0.288	0.107	2.80334e-06	3	Creb5
Diaph1	1.69907e-10	0.724008	0.429	0.2	2.93904e-06	3	Diaph1
Fam69a	1.72335e-10	0.309553	0.313	0.116	2.98105e-06	3	Fam69a
Sdc3	1.72371e-10	0.433907	0.595	0.32	2.98168e-06	3	Sdc3
Plekhm3	2.15193e-10	0.837713	0.252	0.086	3.72241e-06	3	Plekhm3
Ifi35	2.19216e-10	0.526761	0.442	0.207	3.792e-06	3	Ifi35
Samhd1	2.54542e-10	0.78272	0.724	0.482	4.40306e-06	3	Samhd1
Dock101	2.60454e-10	0.988133	0.552	0.301	4.50534e-06	3	Dock10
Ranbp1	2.65015e-10	0.32724	0.534	0.266	4.58423e-06	3	Ranbp1
Mrpl33	2.72433e-10	0.382827	0.613	0.342	4.71255e-06	3	Mrpl33
Cd91	2.98445e-10	0.496637	0.38	0.165	5.16249e-06	3	Cd9
Gbp2	3.2029e-10	1.08518	0.276	0.101	5.54038e-06	3	Gbp2
Irgm1	4.16226e-10	0.742154	0.325	0.138	7.19987e-06	3	Irgm1
Trim30a	4.34311e-10	0.58506	0.46	0.223	7.51271e-06	3	Trim30a
Bcl2a1d	4.80831e-10	0.457781	0.258	0.09	8.31742e-06	3	Bcl2a1d
Fam129a1	5.16072e-10	0.580254	0.497	0.248	8.92702e-06	3	Fam129a
Shisa51	5.42601e-10	0.519494	0.712	0.469	9.38591e-06	3	Shisa5
Xaf1	5.54057e-10	0.392802	0.387	0.165	9.58407e-06	3	Xaf1
BC0285281	6.52313e-10	0.507643	0.466	0.229	1.12837e-05	3	BC028528
Tmem219	7.03443e-10	0.415387	0.509	0.261	1.21682e-05	3	Tmem219
Slk	7.21919e-10	0.730392	0.282	0.106	1.24878e-05	3	Slk
Eif2s1	9.08626e-10	0.424061	0.454	0.218	1.57174e-05	3	Eif2s1
Ankrd44	9.1899e-10	0.959079	0.429	0.207	1.58967e-05	3	Ankrd44
Tank	1.03124e-09	0.357027	0.374	0.161	1.78384e-05	3	Tank
2021-09-09	1.14932e-09	0.610786	0.362	0.157	1.9881e-05	3	2021-09-09
Tagln2	1.15016e-09	0.531253	0.65	0.427	1.98955e-05	3	Tagln2
Ccdc86	1.27969e-09	0.274214	0.252	0.086	2.2136e-05	3	Ccdc86
Bak1	1.33817e-09	0.316533	0.325	0.13	2.31477e-05	3	Bak1
Tcirg11	1.63628e-09	0.579596	0.564	0.303	2.83044e-05	3	Tcirg1
Dck	1.83547e-09	0.460719	0.294	0.116	3.17499e-05	3	Dck
Lacc1	2.08886e-09	0.597455	0.417	0.194	3.61332e-05	3	Lacc1
Ncf41	2.32078e-09	0.301669	0.534	0.274	4.01448e-05	3	Ncf4
Rgs21	2.50498e-09	0.418489	0.466	0.224	4.33311e-05	3	Rgs2
Zmiz2	2.886e-09	0.568526	0.356	0.157	4.9922e-05	3	Zmiz2
Ezr	2.93614e-09	0.520607	0.282	0.112	5.07894e-05	3	Ezr
Lilrb4a	3.20692e-09	0.585498	0.301	0.12	5.54733e-05	3	Lilrb4a
H2-DMa1	3.34092e-09	0.565405	0.761	0.546	5.77912e-05	3	H2-DMa
Slc12a9	3.63833e-09	0.591057	0.35	0.155	6.29358e-05	3	Slc12a9
Pilra1	3.64476e-09	0.251036	0.331	0.136	6.30471e-05	3	Pilra
Rassf41	3.90254e-09	0.529825	0.761	0.47	6.75061e-05	3	Rassf4
Gpx1	4.96265e-09	0.70268	0.84	0.818	8.58439e-05	3	Gpx1
Nktr	4.98407e-09	0.562115	0.411	0.194	8.62144e-05	3	Nktr
Grk3	5.34568e-09	0.777903	0.331	0.142	9.24697e-05	3	Grk3
Sfpq	5.42649e-09	0.487126	0.479	0.238	9.38674e-05	3	Sfpq
Batf3	5.46403e-09	0.576943	0.405	0.199	9.45168e-05	3	Batf3
H2-Eb11	5.66964e-09	0.533628	0.908	0.73	9.80734e-05	3	H2-Eb1
Trim12c	5.88682e-09	0.381643	0.337	0.142	0.00010183	3	Trim12c
Taok3	5.9192e-09	0.651803	0.589	0.333	0.00010239	3	Taok3
Cd721	5.97665e-09	0.445172	0.521	0.285	0.000103384	3	Cd72
Pik3cd	6.10293e-09	0.729226	0.411	0.196	0.000105568	3	Pik3cd
Arhgap15	6.40025e-09	0.903746	0.436	0.217	0.000110711	3	Arhgap15
Tmpo	7.37135e-09	0.487369	0.288	0.116	0.00012751	3	Tmpo
Nudt21	7.49435e-09	0.264252	0.429	0.203	0.000129637	3	Nudt21
Atf3	7.53648e-09	0.545341	0.282	0.112	0.000130366	3	Atf3
Clic4	8.00922e-09	0.618011	0.472	0.249	0.000138544	3	Clic4
Eif4a1	8.08919e-09	0.527261	0.767	0.566	0.000139927	3	Eif4a1
Tspan131	8.25957e-09	0.502651	0.325	0.138	0.000142874	3	Tspan13
Mbnl1	8.34655e-09	0.786698	0.791	0.515	0.000144379	3	Mbnl1
9930111J21Rik2	8.96874e-09	0.529435	0.472	0.237	0.000155141	3	9930111J21Rik2
Gbp3	9.00743e-09	0.418666	0.282	0.116	0.00015581	3	Gbp3
Pdia61	9.06339e-09	0.465885	0.687	0.479	0.000156778	3	Pdia6
Lrrfip1	9.89594e-09	0.311266	0.405	0.189	0.00017118	3	Lrrfip1
Ccnl1	1.00394e-08	1.0269	0.485	0.262	0.000173662	3	Ccnl1
Sec24b	1.2008e-08	0.492475	0.282	0.112	0.000207715	3	Sec24b
Xrn2	1.27303e-08	0.565006	0.448	0.23	0.000220208	3	Xrn2
Ifi213	1.27502e-08	0.507471	0.276	0.112	0.000220552	3	Ifi213
Msn	1.29646e-08	0.486156	0.748	0.52	0.000224261	3	Msn
Bloc1s2	1.49051e-08	0.504308	0.319	0.135	0.000257828	3	Bloc1s2
Ifi211	1.62375e-08	0.938199	0.356	0.176	0.000280876	3	Ifi211
Dcp2	1.8651e-08	0.318962	0.301	0.124	0.000322625	3	Dcp2
Eif2ak21	2.12347e-08	0.425166	0.337	0.151	0.000367317	3	Eif2ak2
Lpl	2.18467e-08	0.768481	0.387	0.189	0.000377905	3	Lpl
Zc3hav1	2.21328e-08	0.419526	0.38	0.183	0.000382854	3	Zc3hav1
Gm2a1	2.29862e-08	0.562295	0.65	0.431	0.000397615	3	Gm2a
Itga4	2.37436e-08	0.867135	0.448	0.239	0.000410717	3	Itga4
Dock2	2.37971e-08	0.661827	0.558	0.306	0.000411643	3	Dock2
Btg1	2.45308e-08	0.4264	0.589	0.334	0.000424333	3	Btg1
Slfn21	2.48423e-08	0.515242	0.663	0.41	0.000429722	3	Slfn2
Ptpro	2.72591e-08	0.449345	0.454	0.223	0.000471527	3	Ptpro
Itgb21	2.95561e-08	0.436551	0.632	0.369	0.000511262	3	Itgb2
Ccnd11	3.30004e-08	0.574046	0.65	0.441	0.000570841	3	Ccnd1
Ccdc121	3.37019e-08	0.314821	0.656	0.403	0.000582975	3	Ccdc12
Svil	3.47025e-08	0.512794	0.313	0.134	0.000600284	3	Svil
Gm340841	3.51331e-08	0.334636	0.509	0.269	0.000607732	3	Gm34084
Rplp0	3.86452e-08	0.509325	0.84	0.846	0.000668484	3	Rplp0
Igtp	4.17002e-08	0.396115	0.288	0.125	0.000721329	3	Igtp
Stap1	4.36295e-08	0.455032	0.331	0.144	0.000754702	3	Stap1
Psma4	4.43545e-08	0.266402	0.546	0.32	0.000767243	3	Psma4
Hcls1	4.57656e-08	0.300867	0.742	0.469	0.000791654	3	Hcls1
Adar	4.87419e-08	0.284472	0.27	0.11	0.000843137	3	Adar
Ccr52	5.03493e-08	0.448236	0.448	0.226	0.000870942	3	Ccr5
Parp1	5.06506e-08	0.474261	0.436	0.218	0.000876154	3	Parp1
Dars	5.6845e-08	0.349294	0.393	0.188	0.000983304	3	Dars
Arcn1	5.86453e-08	0.324797	0.344	0.153	0.00101445	3	Arcn1
Il10ra1	6.66316e-08	0.375516	0.706	0.447	0.00115259	3	Il10ra
Ywhah	6.67902e-08	0.404826	0.773	0.559	0.00115534	3	Ywhah
Atf4	6.69634e-08	0.256539	0.362	0.165	0.00115833	3	Atf4
Rnf213	6.86165e-08	0.786451	0.436	0.242	0.00118693	3	Rnf213
Bach11	7.42766e-08	0.256204	0.374	0.173	0.00128484	3	Bach1
Cast	8.54044e-08	0.320471	0.35	0.16	0.00147733	3	Cast
Slc35c2	8.72924e-08	0.357289	0.35	0.162	0.00150998	3	Slc35c2
Macf11	8.86606e-08	0.584883	0.534	0.299	0.00153365	3	Macf1
Ptpn6	9.13146e-08	0.46352	0.712	0.468	0.00157956	3	Ptpn6
Cyp4f181	9.43082e-08	0.305644	0.393	0.194	0.00163134	3	Cyp4f18
H2-Aa1	1.03137e-07	0.449935	0.933	0.745	0.00178407	3	H2-Aa
BC005537	1.05412e-07	0.451645	0.552	0.319	0.00182341	3	BC005537
U2af2	1.05643e-07	0.427531	0.503	0.286	0.00182741	3	U2af2
Hpcal1	1.06773e-07	0.370042	0.491	0.266	0.00184697	3	Hpcal1
Parp9	1.12123e-07	0.541623	0.319	0.148	0.0019395	3	Parp9
Mcm3	1.28373e-07	0.381687	0.27	0.114	0.0022206	3	Mcm3
Ier51	1.54862e-07	0.372503	0.503	0.281	0.0026788	3	Ier5
Sp110	1.55083e-07	0.502641	0.423	0.225	0.00268263	3	Sp110
Zcchc7	1.60747e-07	0.518045	0.27	0.114	0.0027806	3	Zcchc7
Rbm25	1.75237e-07	0.316217	0.589	0.337	0.00303126	3	Rbm25
Eno1	1.80944e-07	0.390468	0.681	0.468	0.00312996	3	Eno1
Irf7	1.86109e-07	1.1979	0.405	0.223	0.00321932	3	Irf7
Fam49b1	1.86795e-07	0.482096	0.687	0.468	0.00323118	3	Fam49b
Fubp1	1.88701e-07	0.50701	0.442	0.227	0.00326416	3	Fubp1
Tifab1	1.93282e-07	0.358658	0.46	0.247	0.00334339	3	Tifab
Arhgap451	2.33507e-07	0.682691	0.748	0.498	0.0040392	3	Arhgap45
Dynll11	2.43678e-07	0.438638	0.675	0.468	0.00421514	3	Dynll1
Ube2j2	2.4494e-07	0.305794	0.344	0.165	0.00423698	3	Ube2j2
Esyt11	2.52125e-07	0.483757	0.368	0.184	0.00436126	3	Esyt1
Ddx58	2.54026e-07	0.563088	0.282	0.126	0.00439414	3	Ddx58
Hnrnpa1	2.59343e-07	0.268021	0.589	0.357	0.00448611	3	Hnrnpa1
Sod2	2.93751e-07	0.492812	0.362	0.183	0.00508131	3	Sod2
Isg15	3.13065e-07	1.46833	0.405	0.224	0.0054154	3	Isg15
Fbrsl1	3.40695e-07	0.383401	0.288	0.128	0.00589333	3	Fbrsl1
Jpt1	3.51107e-07	0.350534	0.736	0.491	0.00607345	3	Jpt1
Pstpip1	3.633e-07	0.359932	0.319	0.15	0.00628436	3	Pstpip1
Mob1a	3.65559e-07	0.282607	0.509	0.283	0.00632344	3	Mob1a
Cct2	3.92544e-07	0.282545	0.552	0.314	0.00679023	3	Cct2
Ppp2r2a	4.1089e-07	0.38126	0.307	0.144	0.00710757	3	Ppp2r2a
Sppl2a	4.99419e-07	0.429909	0.503	0.287	0.00863896	3	Sppl2a
Cd47	5.03581e-07	0.475324	0.687	0.467	0.00871095	3	Cd47
Cdc5l	5.39333e-07	0.459442	0.38	0.197	0.00932937	3	Cdc5l
Slfn8	5.61752e-07	0.363984	0.307	0.142	0.00971719	3	Slfn8
Irf2	5.8746e-07	0.260187	0.595	0.353	0.0101619	3	Irf2
Dnajc7	6.04092e-07	0.402462	0.479	0.262	0.0104496	3	Dnajc7
Trappc5	6.36732e-07	0.290411	0.325	0.154	0.0110142	3	Trappc5
Ddx18	6.37492e-07	0.418494	0.368	0.182	0.0110273	3	Ddx18
H2-T22	6.49304e-07	0.409651	0.485	0.273	0.0112317	3	H2-T22
Dok21	7.03949e-07	0.460258	0.368	0.193	0.0121769	3	Dok2
Zufsp	7.05581e-07	0.937464	0.331	0.163	0.0122051	3	Zufsp
Ifih1	7.25094e-07	0.517907	0.276	0.125	0.0125427	3	Ifih1
Set	7.47901e-07	0.255745	0.515	0.302	0.0129372	3	Set
Ifi204	7.80595e-07	0.689994	0.374	0.205	0.0135027	3	Ifi204
Mcl1	7.82105e-07	0.471208	0.485	0.274	0.0135289	3	Mcl1
Tapbp	7.89681e-07	0.398756	0.687	0.441	0.0136599	3	Tapbp
Ccnt2	8.33441e-07	0.477276	0.301	0.141	0.0144169	3	Ccnt2
Ifi47	8.73373e-07	0.808197	0.362	0.201	0.0151076	3	Ifi47
Dapp11	8.97027e-07	0.686062	0.393	0.209	0.0155168	3	Dapp1
Dtx3l	9.0932e-07	0.456071	0.319	0.157	0.0157294	3	Dtx3l
Parp14	9.3954e-07	0.932961	0.454	0.264	0.0162522	3	Parp14
Srgn	1.02972e-06	0.431517	0.706	0.484	0.017812	3	Srgn
Dnajb1	1.0452e-06	0.351904	0.393	0.201	0.0180799	3	Dnajb1
Fbl	1.09884e-06	0.251884	0.497	0.287	0.0190078	3	Fbl
Ppp4r3a	1.24303e-06	0.451426	0.288	0.132	0.0215019	3	Ppp4r3a
Rnf114	1.26565e-06	0.370391	0.337	0.169	0.0218931	3	Rnf114
Fes1	1.39858e-06	0.277227	0.626	0.385	0.0241926	3	Fes
Rpsa	1.45548e-06	0.271297	0.877	0.874	0.0251769	3	Rpsa
Sf3b1	1.51379e-06	0.457222	0.675	0.43	0.0261856	3	Sf3b1
Rbck1	1.55805e-06	0.252571	0.399	0.203	0.0269512	3	Rbck1
Psmb10	1.67738e-06	0.332991	0.583	0.366	0.0290154	3	Psmb10
Pbxip1	1.79172e-06	0.46812	0.294	0.141	0.0309932	3	Pbxip1
Noc2l	1.92457e-06	0.376763	0.307	0.147	0.0332911	3	Noc2l
Sec61a1	2.01419e-06	0.394727	0.399	0.218	0.0348414	3	Sec61a1
Cntrl	2.0546e-06	0.433149	0.276	0.125	0.0355405	3	Cntrl
Itpripl2	2.09449e-06	0.369958	0.35	0.18	0.0362305	3	Itpripl2
Rrbp11	2.10941e-06	0.444201	0.84	0.588	0.0364886	3	Rrbp1
Sbno2	2.21533e-06	0.550517	0.258	0.118	0.0383207	3	Sbno2
Gm26740	2.21863e-06	0.608054	0.368	0.201	0.0383779	3	Gm26740
Lrp12	2.22214e-06	0.252569	0.577	0.348	0.0384386	3	Lrp1
Trim28	2.3573e-06	0.333386	0.313	0.152	0.0407766	3	Trim28
Ccnd2	2.51709e-06	0.269368	0.276	0.13	0.0435405	3	Ccnd2
Efhd21	2.58255e-06	0.278346	0.736	0.505	0.0446729	3	Efhd2
Uvrag	2.65898e-06	0.667002	0.491	0.283	0.0459951	3	Uvrag
Sms	2.69607e-06	0.419205	0.252	0.111	0.0466366	3	Sms
Rel	2.70821e-06	0.420789	0.387	0.207	0.0468466	3	Rel
Oas1a	2.84569e-06	0.470767	0.405	0.239	0.0492247	3	Oas1a
Irf1	2.94128e-06	0.483974	0.423	0.239	0.0508783	3	Irf1
Fcgr41	2.97029e-06	0.430697	0.337	0.179	0.0513801	3	Fcgr4
Oasl2	2.97449e-06	0.727562	0.423	0.248	0.0514527	3	Oasl2
Clec12a1	3.10161e-06	0.314123	0.693	0.455	0.0536517	3	Clec12a
Camkk2	3.2076e-06	0.405842	0.252	0.112	0.0554851	3	Camkk2
Cdk2ap2	3.47815e-06	0.40956	0.466	0.275	0.060165	3	Cdk2ap2
Pitpna	3.52261e-06	0.309531	0.558	0.342	0.0609341	3	Pitpna
Mpeg11	3.7814e-06	0.382042	0.742	0.493	0.0654106	3	Mpeg1
Slfn5	3.96189e-06	0.714715	0.466	0.281	0.0685328	3	Slfn5
Syncrip	3.96569e-06	0.332726	0.337	0.17	0.0685984	3	Syncrip
Gm26917	4.00922e-06	1.22852	0.497	0.315	0.0693514	3	Gm26917
Ccng1	4.25977e-06	0.277411	0.331	0.169	0.0736855	3	Ccng1
Adam171	4.39115e-06	0.295979	0.344	0.177	0.0759582	3	Adam17
Parp12	4.54525e-06	0.327245	0.27	0.131	0.0786237	3	Parp12
Arfgef1	4.56072e-06	0.260693	0.276	0.128	0.0788914	3	Arfgef1
Pds5a	4.59457e-06	0.552456	0.258	0.119	0.0794768	3	Pds5a
Fus	4.62433e-06	0.360305	0.62	0.417	0.0799916	3	Fus
Tgs1	4.74863e-06	0.335796	0.417	0.229	0.0821419	3	Tgs1
Ttc14	4.8349e-06	0.600863	0.344	0.184	0.0836341	3	Ttc14
Lbr	4.83512e-06	0.280024	0.325	0.161	0.0836379	3	Lbr
Smarcc1	4.99775e-06	0.259004	0.27	0.124	0.086451	3	Smarcc1
Cops5	5.0615e-06	0.284745	0.282	0.134	0.0875539	3	Cops5
Dync1h1	5.33152e-06	0.350893	0.521	0.299	0.0922246	3	Dync1h1
Irak21	5.45272e-06	0.452742	0.307	0.152	0.0943211	3	Irak2
Mybbp1a	5.53022e-06	0.433035	0.313	0.159	0.0956617	3	Mybbp1a
Rap1a	5.61644e-06	0.29489	0.742	0.535	0.0971532	3	Rap1a
Gps2	5.72258e-06	0.344497	0.466	0.269	0.0989892	3	Gps2
Smg1	6.0009e-06	0.271692	0.387	0.206	0.103804	3	Smg1
Klhdc3	6.0131e-06	0.328516	0.276	0.133	0.104015	3	Klhdc3
Cd741	6.17108e-06	0.402236	0.939	0.885	0.106747	3	Cd74
Vamp2	6.54507e-06	0.437246	0.258	0.119	0.113217	3	Vamp2
Far1	6.60387e-06	0.417592	0.393	0.214	0.114234	3	Far1
Ccnd3	6.85899e-06	0.303243	0.411	0.236	0.118647	3	Ccnd3
Acadl	6.93293e-06	0.264731	0.405	0.228	0.119926	3	Acadl
Synj1	7.39511e-06	0.596279	0.368	0.211	0.127921	3	Synj1
Junb1	7.41999e-06	0.295392	0.577	0.353	0.128351	3	Junb
Mat2a	7.62085e-06	0.299086	0.515	0.31	0.131826	3	Mat2a
Myo1f1	7.66561e-06	0.264984	0.546	0.329	0.1326	3	Myo1f
Max	7.7866e-06	0.309017	0.411	0.228	0.134693	3	Max
Crk	7.94845e-06	0.266049	0.282	0.138	0.137492	3	Crk
Eml4	8.48971e-06	0.32954	0.282	0.137	0.146855	3	Eml4
Pa2g4	8.67525e-06	0.250815	0.509	0.311	0.150065	3	Pa2g4
Ankrd11	9.09095e-06	0.412713	0.417	0.237	0.157255	3	Ankrd11
Fmnl11	9.31801e-06	0.269185	0.583	0.362	0.161183	3	Fmnl1
Bax	9.37122e-06	0.300438	0.601	0.404	0.162103	3	Bax
Ehbp1l1	9.43992e-06	0.403464	0.46	0.265	0.163292	3	Ehbp1l1
Pold41	9.61569e-06	0.294584	0.466	0.271	0.166332	3	Pold4
Baz1a	9.70997e-06	0.592036	0.264	0.132	0.167963	3	Baz1a
Rasa4	1.01245e-05	0.566616	0.454	0.279	0.175134	3	Rasa4
Naa15	1.02826e-05	0.296714	0.294	0.148	0.177868	3	Naa15
Rpl4	1.07952e-05	0.268608	0.767	0.618	0.186735	3	Rpl4
Vasp	1.09868e-05	0.307438	0.466	0.286	0.190049	3	Vasp
Piezo1	1.11834e-05	0.27011	0.264	0.129	0.19345	3	Piezo1
Btf3	1.17532e-05	0.29258	0.755	0.643	0.203306	3	Btf3
Sf3b3	1.19645e-05	0.282854	0.356	0.188	0.206961	3	Sf3b3
Rassf1	1.20496e-05	0.613738	0.344	0.191	0.208433	3	Rassf1
Srsf3	1.20516e-05	0.267635	0.589	0.396	0.208469	3	Srsf3
Tor3a1	1.26939e-05	0.580972	0.35	0.202	0.21958	3	Tor3a
Rsrc2	1.28577e-05	0.452227	0.393	0.222	0.222412	3	Rsrc2
Rps6	1.29665e-05	0.303625	0.785	0.682	0.224295	3	Rps6
Adcy71	1.32297e-05	0.489992	0.38	0.215	0.228848	3	Adcy7
Xbp11	1.33804e-05	0.283162	0.558	0.346	0.231455	3	Xbp1
Ubl3	1.34432e-05	0.277113	0.479	0.281	0.23254	3	Ubl3
Hnrnpd	1.41774e-05	0.364626	0.282	0.144	0.24524	3	Hnrnpd
Tmem50b1	1.47883e-05	0.315503	0.325	0.171	0.255808	3	Tmem50b
Arhgef6	1.54649e-05	0.322557	0.448	0.256	0.267512	3	Arhgef6
Elf1	1.60245e-05	0.456985	0.454	0.271	0.277191	3	Elf1
Atxn2l	1.6747e-05	0.482794	0.344	0.188	0.289689	3	Atxn2l
Ppm1m	1.76989e-05	0.304623	0.313	0.163	0.306155	3	Ppm1m
Fnbp1l	1.92722e-05	0.29947	0.252	0.124	0.333371	3	Fnbp1l
Foxp1	1.96708e-05	0.312888	0.362	0.196	0.340265	3	Foxp1
Snrnp70	1.98037e-05	0.367615	0.65	0.42	0.342564	3	Snrnp70
Myh9	2.01699e-05	0.329496	0.755	0.539	0.348899	3	Myh9
Ptpre1	2.04029e-05	0.36855	0.558	0.349	0.352929	3	Ptpre
Mtdh1	2.08034e-05	0.369513	0.656	0.443	0.359857	3	Mtdh
Sash3	2.28761e-05	0.302388	0.313	0.165	0.395711	3	Sash3
Zc3h7a	2.43778e-05	0.589744	0.307	0.167	0.421687	3	Zc3h7a
Tardbp	2.4923e-05	0.399247	0.344	0.187	0.431117	3	Tardbp
D17Wsu92e	2.50965e-05	0.30194	0.264	0.131	0.434119	3	D17Wsu92e
Purb	2.56566e-05	0.331535	0.307	0.164	0.443808	3	Purb
Was	2.59149e-05	0.274494	0.497	0.295	0.448275	3	Was
Qrich1	2.61157e-05	0.290062	0.264	0.128	0.451749	3	Qrich1
Icosl	2.71985e-05	0.27701	0.294	0.154	0.470479	3	Icosl
Cep170	2.73361e-05	0.59289	0.362	0.207	0.472861	3	Cep170
Ywhag	2.76967e-05	0.289024	0.497	0.309	0.479097	3	Ywhag
Ptpn1	2.83852e-05	0.304795	0.552	0.347	0.491008	3	Ptpn1
Snhg20	2.84871e-05	0.527193	0.258	0.128	0.492769	3	Snhg20
Nsd3	2.97374e-05	0.521688	0.417	0.247	0.514397	3	Nsd3
Lrrfip2	3.02764e-05	0.384027	0.258	0.129	0.523721	3	Lrrfip2
Ifi203	3.45582e-05	0.877993	0.491	0.337	0.597787	3	Ifi203
Ptma	3.46809e-05	0.311384	0.822	0.803	0.59991	3	Ptma
Pabpc1	3.53966e-05	0.294036	0.828	0.694	0.612291	3	Pabpc1
Tor1aip2	3.59915e-05	0.350293	0.301	0.159	0.622582	3	Tor1aip2
Preb	4.03846e-05	0.338717	0.344	0.186	0.698573	3	Preb
Ak2	4.30611e-05	0.29055	0.387	0.221	0.744871	3	Ak2
Wsb11	4.38965e-05	0.35323	0.38	0.225	0.759322	3	Wsb1
Jund	4.44091e-05	0.258755	0.509	0.321	0.768189	3	Jund
Ms4a6c2	4.4556e-05	0.421479	0.798	0.631	0.77073	3	Ms4a6c
Smchd1	4.58349e-05	0.442595	0.411	0.239	0.792853	3	Smchd1
Rbpj	4.7598e-05	0.264532	0.515	0.33	0.82335	3	Rbpj
Ep300	5.1786e-05	0.282189	0.294	0.156	0.895794	3	Ep300
Srsf10	5.18724e-05	0.511291	0.374	0.214	0.897288	3	Srsf10
Sdf2l1	5.60616e-05	0.331016	0.577	0.379	0.969754	3	Sdf2l1
Ptp4a21	5.66515e-05	0.258862	0.693	0.475	0.979958	3	Ptp4a2
Rps19	6.09041e-05	0.289637	0.84	0.811	1	3	Rps19
H2-K1	6.26977e-05	0.334321	0.914	0.798	1	3	H2-K1
Khdrbs1	6.61251e-05	0.251192	0.546	0.35	1	3	Khdrbs1
Cnppd11	6.64216e-05	0.298311	0.374	0.21	1	3	Cnppd1
Dhx15	7.15799e-05	0.36017	0.436	0.261	1	3	Dhx15
Plek	7.18691e-05	0.325164	0.417	0.252	1	3	Plek
Hsp90aa1	7.30369e-05	0.30034	0.558	0.377	1	3	Hsp90aa1
Etv6	7.30528e-05	0.47726	0.411	0.254	1	3	Etv6
Zzef1	7.79247e-05	0.341364	0.252	0.128	1	3	Zzef1
Cnot6l	8.42318e-05	0.382014	0.258	0.133	1	3	Cnot6l
Ddx39b	8.4664e-05	0.374442	0.564	0.388	1	3	Ddx39b
Ppil2	8.86035e-05	0.530502	0.337	0.192	1	3	Ppil2
Kmt2a	8.86593e-05	0.594556	0.252	0.133	1	3	Kmt2a
Actr2	9.40782e-05	0.278006	0.663	0.425	1	3	Actr2
Klf13	9.57701e-05	0.383333	0.301	0.164	1	3	Klf13
Hnrnpul2	0.000100508	0.287134	0.429	0.248	1	3	Hnrnpul2
Mgl21	0.000102476	0.613064	0.65	0.503	1	3	Mgl2
Fip1l1	0.000104112	0.510833	0.313	0.178	1	3	Fip1l1
Vcpip1	0.000107521	0.331078	0.264	0.139	1	3	Vcpip1
Stk38	0.000110245	0.607258	0.436	0.261	1	3	Stk38
Zfp106	0.000111942	0.264416	0.387	0.229	1	3	Zfp106
Sharpin	0.000112782	0.373492	0.337	0.186	1	3	Sharpin
Lrch1	0.00011896	0.29391	0.252	0.133	1	3	Lrch1
Atf6	0.000120782	0.391935	0.313	0.176	1	3	Atf6
Ilk	0.000126268	0.288752	0.571	0.382	1	3	Ilk
Eif3a	0.000128554	0.269961	0.663	0.436	1	3	Eif3a
Tep1	0.000132317	0.443118	0.399	0.25	1	3	Tep1
Scimp1	0.000133437	0.34599	0.301	0.174	1	3	Scimp
Mndal	0.000145088	0.637471	0.509	0.335	1	3	Mndal
Sp140	0.000145098	0.26296	0.423	0.258	1	3	Sp140
Celf2	0.000145177	0.448538	0.62	0.422	1	3	Celf2
Pnn	0.000145275	0.51788	0.356	0.21	1	3	Pnn
Itch	0.000153087	0.517795	0.313	0.176	1	3	Itch
Chfr	0.000153481	0.363081	0.258	0.134	1	3	Chfr
Hypk	0.000154155	0.284391	0.276	0.147	1	3	Hypk
Hsp90b12	0.000157483	0.291815	0.816	0.659	1	3	Hsp90b1
Ppp1r12a	0.000164733	0.401209	0.442	0.284	1	3	Ppp1r12a
Trim25	0.000165805	0.295441	0.319	0.182	1	3	Trim25
Il6ra	0.000165871	0.470052	0.46	0.302	1	3	Il6ra
Srsf5	0.000169111	0.364413	0.577	0.378	1	3	Srsf5
Zcchc6	0.000188163	0.395883	0.448	0.287	1	3	Zcchc6
Luc7l3	0.000188622	0.410362	0.479	0.3	1	3	Luc7l3
Ifi27l2a	0.00018929	0.527377	0.736	0.691	1	3	Ifi27l2a
1110038F14Rik	0.000190066	0.278702	0.276	0.145	1	3	1110038F14Rik
Chchd3	0.000193103	0.323106	0.258	0.137	1	3	Chchd3
Tap2	0.000203163	0.367817	0.429	0.281	1	3	Tap2
Arf4	0.000217618	0.293887	0.521	0.36	1	3	Arf4
Fam46a1	0.000224225	0.569037	0.411	0.263	1	3	Fam46a
Apbb1ip1	0.000233054	0.300392	0.613	0.425	1	3	Apbb1ip
Baz1b	0.000249235	0.266495	0.319	0.181	1	3	Baz1b
Tlr21	0.000267825	0.426489	0.417	0.261	1	3	Tlr2
Rchy11	0.00028452	0.287081	0.344	0.2	1	3	Rchy1
Nfkbia	0.000286954	0.303937	0.54	0.357	1	3	Nfkbia
Madd	0.000294366	0.265562	0.258	0.138	1	3	Madd
Ascc3	0.00029441	0.420632	0.252	0.136	1	3	Ascc3
Colgalt1	0.000316067	0.284761	0.454	0.287	1	3	Colgalt1
Etnk1	0.000330243	0.51903	0.264	0.154	1	3	Etnk1
Birc6	0.000330836	0.29043	0.38	0.238	1	3	Birc6
Calr1	0.000332068	0.295685	0.632	0.485	1	3	Calr
Mbnl21	0.000333481	0.323797	0.423	0.262	1	3	Mbnl2
2021-03-05	0.000342218	0.302857	0.319	0.187	1	3	2021-03-05
Rasa3	0.000355719	0.299339	0.301	0.169	1	3	Rasa3
Prrc2c	0.000367488	0.265512	0.564	0.377	1	3	Prrc2c
Runx1	0.000374048	0.761559	0.436	0.295	1	3	Runx1
Phip	0.000377109	0.251525	0.368	0.223	1	3	Phip
Bcl10	0.000381274	0.2515	0.46	0.284	1	3	Bcl10
Eif2s3y	0.000381832	0.356542	0.294	0.169	1	3	Eif2s3y
Tor1aip1	0.000387134	0.325405	0.491	0.323	1	3	Tor1aip1
Lgals1	0.000393498	0.252519	0.681	0.534	1	3	Lgals1
Celf1	0.000395397	0.256876	0.325	0.189	1	3	Celf1
Sgk3	0.000424918	0.359326	0.325	0.196	1	3	Sgk3
Baz2b1	0.000452333	0.363806	0.325	0.191	1	3	Baz2b
Ccl6	0.000453345	0.506888	0.626	0.51	1	3	Ccl6
Neat1	0.000473939	0.674584	0.472	0.317	1	3	Neat1
Btg21	0.000499142	0.372238	0.54	0.353	1	3	Btg2
Sema4a1	0.000534518	0.266336	0.485	0.303	1	3	Sema4a
Usp4	0.000541113	0.350159	0.294	0.17	1	3	Usp4
Birc3	0.00054984	0.310783	0.288	0.173	1	3	Birc3
Krit1	0.000635255	0.354558	0.27	0.162	1	3	Krit1
Pdlim51	0.000643502	0.351047	0.288	0.166	1	3	Pdlim5
H2-T23	0.000689304	0.252462	0.564	0.403	1	3	H2-T23
Cnot4	0.000691129	0.451507	0.313	0.184	1	3	Cnot4
Alox5ap1	0.000744322	0.29622	0.798	0.663	1	3	Alox5ap
Dgkd	0.000760471	0.49409	0.393	0.246	1	3	Dgkd
Ddx23	0.000844949	0.296629	0.27	0.154	1	3	Ddx23
Ankrd12	0.000894713	0.541371	0.319	0.199	1	3	Ankrd12
Safb2	0.000953796	0.436664	0.35	0.218	1	3	Safb2
Coro7	0.000982749	0.428326	0.307	0.179	1	3	Coro7
Hnrnpr	0.00103574	0.286331	0.356	0.224	1	3	Hnrnpr
Nfkb1	0.00109273	0.312482	0.374	0.233	1	3	Nfkb1
Arhgap30	0.0011119	0.415226	0.515	0.367	1	3	Arhgap30
Tspo	0.00115925	0.278866	0.675	0.557	1	3	Tspo
Mlec	0.00121309	0.474396	0.325	0.199	1	3	Mlec
Ifitm31	0.00123354	0.667151	0.779	0.732	1	3	Ifitm3
Nadk	0.00128861	0.277085	0.442	0.292	1	3	Nadk
Akap9	0.00131202	0.258137	0.264	0.155	1	3	Akap9
Asap1	0.00135644	0.497464	0.319	0.207	1	3	Asap1
2021-03-11	0.00141219	0.302504	0.319	0.192	1	3	2021-03-01
Cbl	0.00146287	0.254483	0.521	0.338	1	3	Cbl
Rtp4	0.00150228	0.353063	0.417	0.287	1	3	Rtp4
Cbfb	0.001529	0.296392	0.258	0.153	1	3	Cbfb
Xiap	0.00155195	0.332944	0.331	0.208	1	3	Xiap
Sh3bp1	0.00169488	0.322586	0.405	0.26	1	3	Sh3bp1
Ccnl2	0.00177496	0.657994	0.35	0.231	1	3	Ccnl2
Ikbkb	0.00182703	0.412892	0.423	0.291	1	3	Ikbkb
Notch2	0.00186044	0.308207	0.276	0.175	1	3	Notch2
Tra2a1	0.001942	0.408681	0.423	0.285	1	3	Tra2a
Slc38a2	0.00201582	0.636174	0.368	0.248	1	3	Slc38a2
Fcgr2b1	0.00206307	0.344507	0.742	0.56	1	3	Fcgr2b
Arhgef2	0.00235052	0.36323	0.362	0.241	1	3	Arhgef2
Prpf38b1	0.00237721	0.308512	0.368	0.244	1	3	Prpf38b
Zfp36l21	0.00261194	0.270598	0.681	0.506	1	3	Zfp36l2
Csnk2a1	0.00272748	0.252754	0.252	0.147	1	3	Csnk2a1
Malat1	0.00273756	0.487338	0.988	0.796	1	3	Malat1
Luc7l2	0.00292425	0.313925	0.521	0.369	1	3	Luc7l2
Irf81	0.00297723	0.841587	0.589	0.429	1	3	Irf8
Dnajc31	0.00306761	0.259758	0.515	0.353	1	3	Dnajc3
Dock8	0.00318195	0.391713	0.546	0.39	1	3	Dock8
Naga	0.00349778	0.483804	0.325	0.215	1	3	Naga
Apobec3	0.00356743	0.364141	0.521	0.378	1	3	Apobec3
Trim8	0.00404774	0.280924	0.264	0.159	1	3	Trim8
Ddi2	0.0040582	0.387088	0.307	0.205	1	3	Ddi2
Myo9b	0.00412194	0.364882	0.356	0.233	1	3	Myo9b
Setd5	0.00485877	0.272941	0.301	0.191	1	3	Setd5
Wdr26	0.00486722	0.267808	0.307	0.196	1	3	Wdr26
Rbm39	0.00550921	0.380041	0.804	0.612	1	3	Rbm39
Crlf3	0.00569501	0.351224	0.417	0.288	1	3	Crlf3
Cebpz	0.00606826	0.352314	0.331	0.218	1	3	Cebpz
Kdm7a	0.0071816	0.342431	0.307	0.201	1	3	Kdm7a
Tm6sf11	0.00723641	0.286971	0.546	0.378	1	3	Tm6sf1
Tns3	0.00764108	0.255077	0.294	0.19	1	3	Tns3
Ddx50	0.00822101	0.397526	0.252	0.16	1	3	Ddx50
Son	0.00889308	0.273222	0.791	0.612	1	3	Son
Ifi207	0.00893373	0.428564	0.46	0.335	1	3	Ifi207
Hspa51	0.00985551	0.296316	0.736	0.595	1	3	Hspa5
Ccr7	1.28969e-239	4.99363	0.905	0.002	2.2309e-235	4	Ccr7
Cacnb3	4.55391e-205	3.32386	0.81	0.003	7.87736e-201	4	Cacnb3
Nudt17	1.41076e-168	2.53731	0.667	0.003	2.44033e-164	4	Nudt17
Socs2	1.24864e-163	2.66111	0.762	0.011	2.1599e-159	4	Socs2
Spint2	4.44753e-152	2.63727	0.714	0.01	7.69333e-148	4	Spint2
Mreg	1.50269e-141	1.31653	0.524	0	2.59936e-137	4	Mreg
Slco5a1	6.99353e-133	1.54056	0.492	0	1.20974e-128	4	Slco5a1
Gm10851	4.9364e-124	1.58436	0.476	0.001	8.53899e-120	4	Gm10851
Apol7c	4.75073e-122	3.2803	0.524	0.004	8.21782e-118	4	Apol7c
Serpinb6b	2.58434e-117	2.6921	0.54	0.007	4.47038e-113	4	Serpinb6b
Tnfrsf9	1.26119e-115	1.12861	0.429	0	2.18161e-111	4	Tnfrsf9
Gadd45b	7.47633e-115	3.09503	0.746	0.03	1.29326e-110	4	Gadd45b
Il4i1	1.58608e-114	3.066	0.762	0.032	2.7436e-110	4	Il4i1
Adora2a	7.10193e-114	1.35278	0.587	0.012	1.22849e-109	4	Adora2a
Slc4a8	2.58384e-111	2.28986	0.429	0.001	4.46953e-107	4	Slc4a8
Gm13546	7.71055e-107	1.85199	0.413	0.001	1.33377e-102	4	Gm13546
Net1	1.28554e-105	2.4833	0.635	0.02	2.22372e-101	4	Net1
Ccl22	6.41504e-105	2.79701	0.46	0.004	1.10967e-100	4	Ccl22
Adcy6	8.4244e-105	1.74267	0.556	0.012	1.45725e-100	4	Adcy6
H2-Eb2	2.0553e-103	1.38116	0.429	0.003	3.55525e-99	4	H2-Eb2
Ankrd33b	1.13928e-102	1.33268	0.397	0.001	1.97073e-98	4	Ankrd33b
Traf1	2.92596e-98	3.22961	0.825	0.058	5.06132e-94	4	Traf1
Tmem150c	3.34355e-94	1.13591	0.349	0	5.78368e-90	4	Tmem150c
Strip2	3.91301e-94	1.87767	0.381	0.002	6.76873e-90	4	Strip2
Dusp5	1.51027e-93	1.79793	0.556	0.017	2.61246e-89	4	Dusp5
Hmgn3	5.0394e-93	1.31602	0.508	0.012	8.71716e-89	4	Hmgn3
Glipr2	6.67115e-89	1.71297	0.46	0.009	1.15398e-84	4	Glipr2
Fscn1	7.47203e-87	4.89671	0.794	0.065	1.29251e-82	4	Fscn1
Flt3	8.16809e-87	1.41407	0.54	0.018	1.41292e-82	4	Flt3
Ly75	1.75712e-86	1.37266	0.365	0.003	3.03947e-82	4	Ly75
Tnfrsf4	1.9142e-86	1.47951	0.365	0.003	3.31118e-82	4	Tnfrsf4
Adam8	4.6499e-86	1.95233	0.54	0.018	8.04339e-82	4	Adam8
Il7r	3.28822e-83	1.78915	0.46	0.011	5.68796e-79	4	Il7r
Il15ra	9.40548e-83	1.58822	0.54	0.02	1.62696e-78	4	Il15ra
Nr4a3	4.95145e-82	1.511	0.349	0.003	8.56502e-78	4	Nr4a3
Lad1	2.00434e-81	0.934927	0.302	0	3.4671e-77	4	Lad1
Arpin	1.03838e-79	1.1834	0.492	0.016	1.79619e-75	4	Arpin
Ccl5	4.92604e-79	6.31454	0.762	0.067	8.52107e-75	4	Ccl5
Arc	6.19947e-79	1.10782	0.349	0.003	1.07239e-74	4	Arc
Bcl2l14	5.32738e-78	1.42469	0.333	0.003	9.21531e-74	4	Bcl2l14
Foxp4	2.65478e-76	1.29573	0.587	0.03	4.59224e-72	4	Foxp4
Mmp25	4.279e-76	1.58464	0.444	0.013	7.40182e-72	4	Mmp25
Stap2	3.74716e-73	0.620894	0.302	0.002	6.48183e-69	4	Stap2
Eno3	1.97347e-72	2.18548	0.587	0.035	3.4137e-68	4	Eno3
Bhlhe40	6.55125e-69	1.02904	0.365	0.008	1.13324e-64	4	Bhlhe40
Gm47662	1.05795e-68	1.15697	0.254	0	1.83003e-64	4	Gm47662
Adam23	1.49124e-68	1.38391	0.333	0.005	2.57955e-64	4	Adam23
Klrd1	2.68365e-68	1.56472	0.397	0.011	4.64217e-64	4	Klrd1
Spib	2.91825e-68	1.07968	0.333	0.005	5.04798e-64	4	Spib
Samsn1	1.50779e-66	2.95333	0.762	0.087	2.60818e-62	4	Samsn1
Arl5c	4.55325e-66	2.24047	0.762	0.08	7.87621e-62	4	Arl5c
Ramp3	1.93451e-65	1.10547	0.286	0.003	3.34631e-61	4	Ramp3
Tmtc2	2.07337e-65	1.54881	0.444	0.018	3.58652e-61	4	Tmtc2
Sema7a	2.4103e-65	0.578724	0.286	0.003	4.16933e-61	4	Sema7a
Il12b	9.09485e-65	1.71643	0.27	0.002	1.57323e-60	4	Il12b
Fabp5	2.1009e-64	3.58887	0.683	0.065	3.63414e-60	4	Fabp5
Cacna1s	2.67073e-64	0.563411	0.254	0.001	4.61982e-60	4	Cacna1s
2200002D01Rik	2.08699e-63	0.973091	0.302	0.004	3.61008e-59	4	2200002D01Rik
Rabgap1l	3.1312e-62	1.21475	0.556	0.035	5.41635e-58	4	Rabgap1l
Relb	3.90918e-62	2.96419	0.873	0.139	6.76209e-58	4	Relb
Vsig10	5.05595e-62	1.14942	0.317	0.006	8.74579e-58	4	Vsig10
Serpinb9	1.04054e-61	2.1755	0.603	0.049	1.79993e-57	4	Serpinb9
H2-Q6	2.68364e-61	2.33491	0.778	0.095	4.64217e-57	4	H2-Q6
Tmem123	8.29284e-61	4.00277	0.952	0.197	1.43449e-56	4	Tmem123
Gypc	1.32021e-60	0.905542	0.444	0.02	2.28371e-56	4	Gypc
4833407H14Rik	1.55162e-60	0.868673	0.254	0.002	2.684e-56	4	4833407H14Rik
Ass1	4.2665e-59	1.806	0.524	0.035	7.3802e-55	4	Ass1
4930523C07Rik	1.18495e-58	1.3604	0.619	0.054	2.04972e-54	4	4930523C07Rik
Cdkn2b	2.88204e-58	0.872647	0.27	0.003	4.98535e-54	4	Cdkn2b
Il2ra	2.95769e-58	0.694892	0.27	0.003	5.11621e-54	4	Il2ra
Zfp296	3.93241e-58	0.499919	0.27	0.003	6.80229e-54	4	Zfp296
Mxd1	4.14401e-58	1.42777	0.54	0.039	7.16831e-54	4	Mxd1
Slc7a11	3.72133e-57	0.865488	0.254	0.003	6.43716e-53	4	Slc7a11
Fam129c	3.92741e-57	0.549261	0.254	0.003	6.79364e-53	4	Fam129c
Mmp23	4.14486e-57	0.527586	0.254	0.003	7.16977e-53	4	Mmp23
Insl6	8.11623e-57	0.813275	0.349	0.011	1.40394e-52	4	Insl6
Mthfd2	1.32833e-55	1.63517	0.635	0.064	2.29775e-51	4	Mthfd2
Dpp4	2.7087e-55	1.35397	0.476	0.029	4.6855e-51	4	Dpp4
H2-M2	3.7609e-55	2.16117	0.349	0.012	6.50561e-51	4	H2-M2
Dusp2	5.14954e-54	1.10824	0.365	0.014	8.90768e-50	4	Dusp2
Cdc42ep3	2.15402e-53	1.27906	0.508	0.037	3.72602e-49	4	Cdc42ep3
Gnb4	2.17267e-53	1.64188	0.397	0.019	3.75828e-49	4	Gnb4
Vopp1	5.76255e-53	0.956943	0.397	0.019	9.96806e-49	4	Vopp1
Bcl2a1d1	1.20465e-52	1.79002	0.683	0.081	2.0838e-48	4	Bcl2a1d
Slc25a29	1.61824e-52	0.494155	0.27	0.005	2.79923e-48	4	Slc25a29
Avpi1	1.7971e-52	1.46713	0.571	0.052	3.10863e-48	4	Avpi1
Zmynd15	2.61343e-51	2.79122	0.683	0.088	4.52071e-47	4	Zmynd15
Cblb	7.01563e-51	1.68591	0.54	0.048	1.21356e-46	4	Cblb
Gpr68	9.41001e-50	0.992469	0.317	0.011	1.62774e-45	4	Gpr68
P2ry10	5.988e-49	0.712443	0.254	0.005	1.0358e-44	4	P2ry10
Birc2	3.07281e-48	2.20634	0.683	0.089	5.31535e-44	4	Birc2
H2-Q7	1.45115e-47	2.26964	0.841	0.166	2.51021e-43	4	H2-Q7
Myo1g1	4.75975e-47	2.40014	0.841	0.171	8.23341e-43	4	Myo1g
Stx11	7.07766e-47	0.958024	0.349	0.017	1.22429e-42	4	Stx11
Tbc1d4	9.4936e-47	2.05724	0.746	0.113	1.6422e-42	4	Tbc1d4
Papss2	2.36179e-46	0.800569	0.302	0.011	4.08543e-42	4	Papss2
Pmaip1	3.13373e-46	1.32884	0.524	0.049	5.42073e-42	4	Pmaip1
Mx1	1.38794e-44	1.79159	0.603	0.071	2.40085e-40	4	Mx1
Fam177a	2.20388e-44	0.481269	0.302	0.012	3.81227e-40	4	Fam177a
Cd200	4.52019e-43	0.947199	0.302	0.013	7.81902e-39	4	Cd200
Etv3	6.12992e-43	2.31416	0.746	0.134	1.06035e-38	4	Etv3
Cbfa2t31	1.32376e-42	1.75597	0.778	0.141	2.28984e-38	4	Cbfa2t3
Tmem39a	1.49074e-42	1.24636	0.524	0.055	2.57868e-38	4	Tmem39a
Tes	2.1982e-42	1.38748	0.619	0.084	3.80245e-38	4	Tes
Nfkb2	7.88688e-42	1.41198	0.746	0.13	1.36427e-37	4	Nfkb2
Nabp1	1.04607e-41	0.915022	0.476	0.044	1.80949e-37	4	Nabp1
Gatsl2	2.33113e-41	1.35819	0.413	0.031	4.03239e-37	4	Gatsl2
Id2	6.78861e-41	2.30454	0.683	0.111	1.17429e-36	4	Id2
AA467197	1.15538e-40	1.26291	0.254	0.008	1.99858e-36	4	AA467197
Lsp11	2.17492e-40	3.13898	0.921	0.297	3.76218e-36	4	Lsp1
Pcgf5	4.04586e-40	1.79132	0.556	0.07	6.99853e-36	4	Pcgf5
Pfkfb3	5.56757e-39	1.60385	0.603	0.085	9.63079e-35	4	Pfkfb3
Gpr1321	7.96517e-38	1.70552	0.667	0.114	1.37781e-33	4	Gpr132
Trim7	1.14912e-37	0.820503	0.27	0.012	1.98775e-33	4	Trim7
Bcl2a1a	3.88261e-37	1.64463	0.556	0.078	6.71613e-33	4	Bcl2a1a
Plxnc1	6.20987e-37	1.2706	0.619	0.092	1.07418e-32	4	Plxnc1
Cytip1	2.38716e-36	2.53054	0.651	0.123	4.12931e-32	4	Cytip
Arhgef40	4.85227e-36	1.07201	0.397	0.034	8.39345e-32	4	Arhgef40
Tbc1d8	5.44289e-36	1.56492	0.635	0.106	9.41511e-32	4	Tbc1d8
Poglut1	6.79794e-36	1.24316	0.508	0.064	1.17591e-31	4	Poglut1
Nup210	3.1904e-35	0.922377	0.333	0.023	5.51876e-31	4	Nup210
Pmvk	4.21591e-35	1.09974	0.556	0.077	7.29268e-31	4	Pmvk
Cyb561a3	4.88896e-35	1.02629	0.492	0.059	8.45693e-31	4	Cyb561a3
Icam11	1.45729e-34	1.38732	0.714	0.14	2.52082e-30	4	Icam1
Actn1	1.91209e-34	0.835397	0.397	0.036	3.30754e-30	4	Actn1
Gyg	6.84277e-34	2.74097	0.619	0.117	1.18366e-29	4	Gyg
Rgs1	1.063e-33	1.69181	0.429	0.046	1.83877e-29	4	Rgs1
Snn	1.76876e-33	0.851593	0.508	0.064	3.05961e-29	4	Snn
H2-Oa	8.48582e-33	0.688841	0.349	0.028	1.46788e-28	4	H2-Oa
Fam49a	9.58603e-33	1.36982	0.619	0.114	1.65819e-28	4	Fam49a
Rbpms	1.07941e-32	0.778335	0.46	0.055	1.86716e-28	4	Rbpms
Stat4	1.65009e-32	1.41896	0.286	0.018	2.85433e-28	4	Stat4
Fas	1.85107e-32	0.66643	0.333	0.026	3.20199e-28	4	Fas
S100a41	2.82715e-32	1.85337	0.556	0.092	4.8904e-28	4	S100a4
Cyfip2	4.79654e-32	0.71132	0.349	0.03	8.29705e-28	4	Cyfip2
Cd24a	7.94378e-32	0.844057	0.27	0.016	1.37412e-27	4	Cd24a
Btg11	1.06645e-31	2.2923	0.873	0.34	1.84474e-27	4	Btg1
Anxa3	1.53882e-31	2.3109	0.857	0.288	2.66185e-27	4	Anxa3
Rogdi	3.03546e-31	2.36492	0.81	0.268	5.25074e-27	4	Rogdi
Lrrc8c	1.4263e-30	1.31019	0.429	0.052	2.46722e-26	4	Lrrc8c
Mcemp1	3.00167e-30	1.14542	0.381	0.039	5.19229e-26	4	Mcemp1
Rnf115	3.53123e-30	1.34637	0.683	0.153	6.10832e-26	4	Rnf115
Kynu	6.92298e-30	0.446601	0.254	0.015	1.19754e-25	4	Kynu
Lrrk1	8.20852e-30	1.78844	0.746	0.179	1.41991e-25	4	Lrrk1
Sdhaf1	1.47929e-29	1.10212	0.587	0.108	2.55887e-25	4	Sdhaf1
Mob3a	1.63783e-29	1.05217	0.73	0.169	2.83311e-25	4	Mob3a
Csrnp1	5.56548e-29	0.971958	0.349	0.034	9.62716e-25	4	Csrnp1
Fam60a	1.1907e-28	0.815564	0.397	0.047	2.05968e-24	4	Fam60a
Sox4	1.21426e-28	0.721549	0.317	0.028	2.10043e-24	4	Sox4
Sh3bp4	1.22713e-28	0.468249	0.286	0.022	2.12268e-24	4	Sh3bp4
Clu	1.298e-28	2.71264	0.27	0.019	2.24528e-24	4	Clu
Hivep1	1.90443e-28	1.03774	0.492	0.074	3.29428e-24	4	Hivep1
Tmem19	3.28454e-28	1.28357	0.603	0.118	5.6816e-24	4	Tmem19
Stard7	6.46108e-28	1.02188	0.556	0.097	1.11764e-23	4	Stard7
Gbp5	1.21837e-27	0.61726	0.397	0.046	2.10753e-23	4	Gbp5
Syngr2	1.78063e-27	2.39868	0.905	0.472	3.08013e-23	4	Syngr2
Prr14	1.79701e-27	0.956905	0.54	0.098	3.10847e-23	4	Prr14
Spsb1	3.09896e-27	0.631105	0.254	0.018	5.36058e-23	4	Spsb1
Cnn2	8.42685e-27	2.14545	0.825	0.307	1.45768e-22	4	Cnn2
Tnfaip3	8.74079e-27	0.851919	0.349	0.038	1.51198e-22	4	Tnfaip3
Aldh1a2	1.47858e-26	0.727296	0.254	0.018	2.55765e-22	4	Aldh1a2
Cd831	1.91823e-26	1.95347	0.794	0.24	3.31816e-22	4	Cd83
S100a111	2.55198e-26	2.32382	0.81	0.321	4.41442e-22	4	S100a11
Csf2rb	2.61326e-26	1.70742	0.762	0.217	4.52041e-22	4	Csf2rb
Jak2	3.57852e-26	1.13787	0.46	0.07	6.19012e-22	4	Jak2
Csf2rb2	3.79043e-26	1.10808	0.524	0.092	6.55669e-22	4	Csf2rb2
Gbp21	4.18596e-26	1.14639	0.556	0.101	7.24088e-22	4	Gbp2
Clic41	4.2616e-26	2.06047	0.778	0.251	7.37171e-22	4	Clic4
Bri3bp	5.69816e-26	0.960864	0.492	0.083	9.85668e-22	4	Bri3bp
Slc2a6	6.37501e-26	0.597906	0.302	0.028	1.10275e-21	4	Slc2a6
Cd40	6.66105e-26	1.32818	0.524	0.094	1.15223e-21	4	Cd40
Ddhd1	9.84161e-26	1.25669	0.333	0.036	1.7024e-21	4	Ddhd1
Tm4sf5	1.19013e-25	0.902419	0.254	0.019	2.05868e-21	4	Tm4sf5
Gramd3	1.22474e-25	0.585409	0.349	0.039	2.11855e-21	4	Gramd3
Uap1	1.42032e-25	1.24771	0.54	0.105	2.45686e-21	4	Uap1
Nfkbia1	1.49957e-25	1.84005	0.857	0.356	2.59395e-21	4	Nfkbia
Birc31	2.01934e-25	1.19069	0.683	0.162	3.49305e-21	4	Birc3
Mir142hg	2.02641e-25	0.440771	0.302	0.028	3.50528e-21	4	Mir142hg
Traf2	3.25868e-25	0.654798	0.46	0.073	5.63687e-21	4	Traf2
Arhgap22	6.74613e-25	1.32101	0.587	0.129	1.16695e-20	4	Arhgap22
Sepsecs	7.4061e-25	1.00035	0.365	0.044	1.28111e-20	4	Sepsecs
Ift57	2.88158e-24	0.68279	0.333	0.038	4.98457e-20	4	Ift57
Ppp1r15a	3.91694e-24	0.715208	0.397	0.054	6.77552e-20	4	Ppp1r15a
Map4k4	5.42781e-24	1.83353	0.651	0.163	9.38903e-20	4	Map4k4
Pgap2	5.92648e-24	1.44121	0.683	0.191	1.02516e-19	4	Pgap2
Gfpt1	1.15835e-23	0.820663	0.508	0.092	2.00371e-19	4	Gfpt1
Tmem131l	2.25096e-23	1.06789	0.54	0.106	3.89371e-19	4	Tmem131l
Slc38a21	2.33175e-23	1.69095	0.762	0.237	4.03345e-19	4	Slc38a2
Csrp1	2.41399e-23	0.950744	0.46	0.08	4.17572e-19	4	Csrp1
Apobec31	2.63818e-23	1.48162	0.889	0.37	4.56352e-19	4	Apobec3
Rasal2	3.65947e-23	0.681531	0.254	0.022	6.33015e-19	4	Rasal2
Ogfrl1	5.39355e-23	0.928687	0.587	0.131	9.32977e-19	4	Ogfrl1
Prnp	7.54916e-23	0.670139	0.317	0.037	1.30585e-18	4	Prnp
Idi1	9.49383e-23	1.10976	0.317	0.039	1.64224e-18	4	Idi1
Cd441	1.16945e-22	1.28801	0.556	0.118	2.02292e-18	4	Cd44
Psme2	1.29406e-22	2.29069	0.889	0.539	2.23846e-18	4	Psme2
Ktn1	1.36459e-22	1.19589	0.619	0.144	2.36047e-18	4	Ktn1
Ccser2	3.86546e-22	0.944877	0.381	0.057	6.68648e-18	4	Ccser2
Iscu1	5.00953e-22	1.77237	0.873	0.422	8.66549e-18	4	Iscu
Gucd1	5.28308e-22	0.644958	0.413	0.067	9.13867e-18	4	Gucd1
Crip11	5.80607e-22	2.69118	0.889	0.512	1.00433e-17	4	Crip1
Gm12216	1.82626e-21	0.865407	0.286	0.033	3.15907e-17	4	Gm12216
Lactb	2.11079e-21	1.17645	0.46	0.09	3.65124e-17	4	Lactb
Phf11a	2.40063e-21	0.802355	0.413	0.07	4.15261e-17	4	Phf11a
Cd274	2.58622e-21	0.447442	0.254	0.024	4.47365e-17	4	Cd274
Ezh2	4.80859e-21	0.288916	0.333	0.043	8.31789e-17	4	Ezh2
Aebp2	5.05584e-21	1.08327	0.46	0.09	8.7456e-17	4	Aebp2
Mvp	5.39394e-21	1.33202	0.635	0.168	9.33043e-17	4	Mvp
Mmd	1.04414e-20	0.613075	0.46	0.084	1.80615e-16	4	Mmd
Fam32a	1.33895e-20	1.34279	0.794	0.301	2.31612e-16	4	Fam32a
Ppdpf	1.34522e-20	0.842322	0.556	0.127	2.32696e-16	4	Ppdpf
Actg11	1.63065e-20	2.3587	0.937	0.786	2.8207e-16	4	Actg1
Rftn1	2.13022e-20	1.05746	0.635	0.174	3.68485e-16	4	Rftn1
Casp3	2.13253e-20	1.04923	0.524	0.12	3.68885e-16	4	Casp3
Rab9	4.77063e-20	1.02444	0.524	0.123	8.25223e-16	4	Rab9
Pex16	5.35914e-20	0.640544	0.365	0.057	9.27025e-16	4	Pex16
Rel1	8.09972e-20	1.68136	0.683	0.207	1.40109e-15	4	Rel
Nup85	9.49798e-20	0.677757	0.429	0.078	1.64296e-15	4	Nup85
Rps191	1.10474e-19	1.44736	0.952	0.807	1.91098e-15	4	Rps19
Psmb8	1.14852e-19	1.51114	0.921	0.633	1.98671e-15	4	Psmb8
Cxcl161	1.18433e-19	1.54136	0.905	0.524	2.04866e-15	4	Cxcl16
Polr3c	1.44438e-19	1.08633	0.508	0.122	2.49849e-15	4	Polr3c
Laptm4b	1.511e-19	1.15069	0.317	0.045	2.61372e-15	4	Laptm4b
AW112010	1.56542e-19	2.42078	0.762	0.316	2.70786e-15	4	AW112010
Selplg2	1.74388e-19	2.04741	0.81	0.438	3.01657e-15	4	Selplg
Psme1	2.11942e-19	1.65332	0.921	0.639	3.66617e-15	4	Psme1
Marcksl1	2.20728e-19	1.78158	0.857	0.503	3.81815e-15	4	Marcksl1
B4galnt12	2.31772e-19	1.26883	0.556	0.152	4.00919e-15	4	B4galnt1
Batf31	3.639e-19	1.30162	0.651	0.204	6.29474e-15	4	Batf3
Gsr	3.78439e-19	0.291301	0.286	0.035	6.54624e-15	4	Gsr
Cd471	3.95376e-19	1.34445	0.905	0.474	6.83921e-15	4	Cd47
Vim1	4.29199e-19	2.09289	0.841	0.393	7.42428e-15	4	Vim
Pold1	6.6952e-19	0.379277	0.317	0.045	1.15814e-14	4	Pold1
Cdkn1a1	6.72948e-19	1.19205	0.508	0.118	1.16407e-14	4	Cdkn1a
Rasa2	8.1399e-19	0.841817	0.381	0.068	1.40804e-14	4	Rasa2
Tmsb101	8.34405e-19	1.84536	0.889	0.573	1.44335e-14	4	Tmsb10
Gsto1	8.88865e-19	0.751551	0.476	0.102	1.53756e-14	4	Gsto1
Nfkbib	8.92811e-19	0.833902	0.571	0.151	1.54438e-14	4	Nfkbib
Sbno21	9.72932e-19	1.36816	0.508	0.116	1.68298e-14	4	Sbno2
H2-K11	1.26931e-18	1.39149	0.968	0.805	2.19566e-14	4	H2-K1
Rgs3	1.43928e-18	0.404687	0.333	0.049	2.48967e-14	4	Rgs3
Clec2d1	1.5134e-18	1.4996	0.857	0.412	2.61788e-14	4	Clec2d
Icosl1	1.53478e-18	1.45498	0.556	0.152	2.65486e-14	4	Icosl
Rpsa1	1.81581e-18	1.7253	0.968	0.869	3.14099e-14	4	Rpsa
Irf11	1.88206e-18	1.4094	0.698	0.24	3.25559e-14	4	Irf1
Tspan3	1.94404e-18	2.11647	0.698	0.285	3.3628e-14	4	Tspan3
Chka	2.20975e-18	1.39822	0.381	0.07	3.82242e-14	4	Chka
Relt	2.50822e-18	0.741879	0.333	0.052	4.33873e-14	4	Relt
Uvrag1	2.83053e-18	1.50383	0.746	0.287	4.89626e-14	4	Uvrag
Hmga1	2.97063e-18	0.873817	0.619	0.185	5.1386e-14	4	Hmga1
Smarce1	3.57156e-18	0.901466	0.619	0.183	6.17808e-14	4	Smarce1
Lyst	3.97219e-18	0.875032	0.333	0.054	6.87109e-14	4	Lyst
Slc33a1	4.71602e-18	0.65528	0.302	0.043	8.15776e-14	4	Slc33a1
Haao	5.07364e-18	0.643755	0.254	0.03	8.77639e-14	4	Haao
Slamf72	6.01009e-18	1.27021	0.683	0.206	1.03962e-13	4	Slamf7
Vhl	6.08192e-18	0.636426	0.397	0.075	1.05205e-13	4	Vhl
Pbxip11	6.63035e-18	1.00885	0.54	0.141	1.14692e-13	4	Pbxip1
N4bp2l1	8.21706e-18	1.32727	0.524	0.134	1.42139e-13	4	N4bp2l1
Stat3	1.36348e-17	1.01892	0.698	0.255	2.35855e-13	4	Stat3
Mkl1	2.04263e-17	1.10163	0.54	0.141	3.53333e-13	4	Mkl1
Dok11	2.17854e-17	1.15418	0.651	0.227	3.76844e-13	4	Dok1
Map3k14	2.30841e-17	1.31247	0.429	0.095	3.99309e-13	4	Map3k14
Bcl2a1b1	2.95737e-17	1.32183	0.73	0.286	5.11565e-13	4	Bcl2a1b
Mif4gd	3.17616e-17	0.978187	0.619	0.196	5.49412e-13	4	Mif4gd
Ier52	3.32521e-17	1.32063	0.73	0.287	5.75194e-13	4	Ier5
Anxa21	3.66736e-17	1.74725	0.683	0.243	6.3438e-13	4	Anxa2
Nfat5	4.18432e-17	1.26593	0.508	0.123	7.23804e-13	4	Nfat5
Htra2	4.61851e-17	1.06063	0.651	0.215	7.9891e-13	4	Htra2
Zfc3h1	4.74146e-17	1.15305	0.556	0.155	8.20178e-13	4	Zfc3h1
S100a61	1.0571e-16	1.00746	0.667	0.203	1.82857e-12	4	S100a6
Swap70	1.07496e-16	1.18203	0.698	0.241	1.85947e-12	4	Swap70
H2-Q4	1.77576e-16	1.48119	0.746	0.307	3.0717e-12	4	H2-Q4
Nfkbie	1.96073e-16	0.936797	0.508	0.127	3.39167e-12	4	Nfkbie
Tapbpl	2.35812e-16	0.69568	0.476	0.115	4.07908e-12	4	Tapbpl
Fam96b	2.49103e-16	0.724087	0.698	0.237	4.30899e-12	4	Fam96b
Nostrin	2.83344e-16	1.07617	0.413	0.094	4.90128e-12	4	Nostrin
Itga41	4.14668e-16	1.36081	0.714	0.243	7.17293e-12	4	Itga4
Triobp	4.37629e-16	0.643403	0.46	0.11	7.57011e-12	4	Triobp
Dennd4a	4.79581e-16	0.74428	0.381	0.075	8.2958e-12	4	Dennd4a
H2-DMb2	5.83948e-16	0.90274	0.302	0.049	1.01011e-11	4	H2-DMb2
Tank1	5.84237e-16	0.705015	0.571	0.168	1.01061e-11	4	Tank
Nlrc5	7.71589e-16	0.352769	0.381	0.075	1.3347e-11	4	Nlrc5
Pik3r5	8.44326e-16	0.786453	0.413	0.09	1.46051e-11	4	Pik3r5
Ikbkb1	8.50701e-16	1.24113	0.746	0.285	1.47154e-11	4	Ikbkb
Phf11b2	1.21934e-15	0.994754	0.667	0.23	2.10921e-11	4	Phf11b
Trim35	1.34613e-15	0.806989	0.619	0.184	2.32853e-11	4	Trim35
Epsti1	1.42361e-15	2.57093	0.81	0.46	2.46256e-11	4	Epsti1
Klrk1	1.573e-15	0.756491	0.286	0.045	2.72098e-11	4	Klrk1
Hmgcs1	2.25335e-15	0.808237	0.365	0.075	3.89785e-11	4	Hmgcs1
Psmg4	2.49713e-15	0.951745	0.635	0.222	4.31953e-11	4	Psmg4
Pde4b	2.67915e-15	1.27188	0.651	0.221	4.6344e-11	4	Pde4b
Pygl	3.72769e-15	0.551162	0.286	0.047	6.44816e-11	4	Pygl
Tpm1	4.27239e-15	0.806004	0.571	0.173	7.39038e-11	4	Tpm1
Apool	4.50571e-15	0.574217	0.286	0.046	7.79397e-11	4	Apool
Nsmce3	7.78824e-15	1.04234	0.476	0.132	1.34721e-10	4	Nsmce3
Clptm1	1.13971e-14	0.819209	0.635	0.223	1.97148e-10	4	Clptm1
Adap1	1.16221e-14	0.51546	0.254	0.038	2.01039e-10	4	Adap1
Palld	1.5794e-14	0.397422	0.333	0.064	2.73205e-10	4	Palld
Il2rg1	1.69613e-14	0.840633	0.651	0.224	2.93397e-10	4	Il2rg
Gtpbp1	1.83159e-14	0.578458	0.333	0.065	3.16829e-10	4	Gtpbp1
Mrpl38	2.29916e-14	0.826429	0.46	0.121	3.97708e-10	4	Mrpl38
Pot1b	2.91314e-14	1.28824	0.397	0.095	5.03915e-10	4	Pot1b
Pla2g16	3.28688e-14	0.931247	0.508	0.155	5.68564e-10	4	Pla2g16
Arf41	3.51526e-14	0.913401	0.81	0.358	6.08069e-10	4	Arf4
Ctnna1	4.78908e-14	1.06995	0.698	0.268	8.28416e-10	4	Ctnna1
Ak21	5.39697e-14	1.03301	0.619	0.223	9.33568e-10	4	Ak2
Mtmr4	5.51711e-14	0.48171	0.302	0.055	9.54349e-10	4	Mtmr4
Tap11	5.85966e-14	1.06343	0.683	0.276	1.0136e-09	4	Tap1
Supt4a	7.11802e-14	1.02029	0.73	0.34	1.23128e-09	4	Supt4a
H2afz	8.98787e-14	1.5251	0.873	0.647	1.55472e-09	4	H2afz
Tbc1d1	9.87572e-14	1.00928	0.397	0.101	1.7083e-09	4	Tbc1d1
Inpp5b	1.10874e-13	0.64456	0.302	0.057	1.91789e-09	4	Inpp5b
Herc6	1.49448e-13	0.552704	0.397	0.088	2.58515e-09	4	Herc6
Mbp	1.50442e-13	0.393996	0.413	0.1	2.60235e-09	4	Mbp
Rab21	1.57719e-13	0.6872	0.365	0.081	2.72822e-09	4	Rab21
Ptger4	1.64984e-13	0.525764	0.333	0.07	2.8539e-09	4	Ptger4
[truncated: 684 more rows]
