# Supplementary material for: The meningeal transcriptional response to traumatic brain injury and aging
Source: eLife. 2023 Jan 3;12:e81154. doi: 10.7554/eLife.81154 (PMC9810333; doi:10.7554/eLife.81154)
Supplement: Figure 2—source data 6. [file elife-81154-fig2-data6.xlsx]

## Sheet: Sheet1
	sham count	TBI count	sham prop	TBI prop	p
Ferritin Expressing	172	241	0.421569	0.283863	<.00001
Anti-Inflammatory	70	256	0.171569	0.301531	<.00001
Resolution Phase	65	166	0.159314	0.195524	0.12114
Inflammatory 1	51	112	0.125	0.13192	0.72786
Inflammatory 2	27	36	0.0661765	0.0424028	0.0703
Dying Cells	23	38	0.0563725	0.0447585	0.36812
Total	408	849
