# Supplementary material for: The meningeal transcriptional response to traumatic brain injury and aging
Source: eLife. 2023 Jan 3;12:e81154. doi: 10.7554/eLife.81154 (PMC9810333; doi:10.7554/eLife.81154)
Supplement: Figure 3—figure supplement 1—source data 1. [file elife-81154-fig3-figsupp1-data1.xlsx]

## Sheet: Sheet1
test_ligand	auroc	aupr	aupr_corrected	pearson	rank
Apoe	0.584631	0.088432	0.0434376	0.0969165	1
Csf1	0.573153	0.0805718	0.0355774	0.0954587	2
Col4a1	0.590009	0.0732979	0.0283035	0.0724729	3
Nov	0.583087	0.0668356	0.0218412	0.0700632	4
Serping1	0.57724	0.0693392	0.0243449	0.0673717	5
Adam17	0.576135	0.067637	0.0226426	0.0653764	6
Tnfsf13	0.584013	0.0677921	0.0227978	0.0635304	7
Jam3	0.591263	0.0640116	0.0190172	0.0632827	8
Anxa1	0.569896	0.0679253	0.0229309	0.0632144	9
Gas6	0.570027	0.0714326	0.0264382	0.062653	10
Vegfa	0.549624	0.0665466	0.0215522	0.0620933	11
Cxcl12	0.564599	0.0644744	0.01948	0.0619947	12
Pgf	0.559143	0.072912	0.0279176	0.0596196	13
Tgfb3	0.567197	0.0616967	0.0167023	0.0572955	14
Hspg2	0.569932	0.0666874	0.021693	0.0562749	15
Agrn	0.565779	0.0698088	0.0248145	0.0557036	16
Gmfb	0.566944	0.0655755	0.0205812	0.055493	17
Icam1	0.562946	0.0647268	0.0197324	0.0549025	18
Vtn	0.554004	0.0736199	0.0286255	0.0542542	19
App	0.559115	0.0733478	0.0283534	0.053682	20
Adam12	0.562614	0.0677931	0.0227987	0.0532774	21
Yars	0.557603	0.0700966	0.0251022	0.0530562	22
Cxcl16	0.562598	0.0664091	0.0214147	0.0528944	23
Ctgf	0.563395	0.0635199	0.0185255	0.0524751	24
Efna5	0.55251	0.072107	0.0271126	0.0517619	25
Angpt2	0.564615	0.0630222	0.0180278	0.051537	26
H2-T23	0.563158	0.064227	0.0192326	0.0505437	27
Tgfb2	0.574458	0.068504	0.0235097	0.0499009	28
Pros1	0.558741	0.0634999	0.0185055	0.049758	29
Ptprf	0.561342	0.0616137	0.0166193	0.0494944	30
Thbs2	0.565483	0.059172	0.0141776	0.0494678	31
Timp1	0.564762	0.0615516	0.0165572	0.0486371	32
Tfpi	0.553002	0.0642288	0.0192345	0.0480264	33
Plat	0.561408	0.0624655	0.0174711	0.0471642	34
Efnb1	0.55595	0.0632137	0.0182193	0.0470462	35
Comp	0.559	0.0616313	0.016637	0.0470031	36
Itgb1	0.557954	0.0622159	0.0172215	0.0469534	37
Pkd1	0.556173	0.062209	0.0172147	0.0468394	38
Angpt1	0.577118	0.0624589	0.0174646	0.0464522	39
Nampt	0.555825	0.0614645	0.0164701	0.046295	40
Thbs1	0.566488	0.061343	0.0163486	0.046111	41
Hmgb1	0.560246	0.0634707	0.0184763	0.0460975	42
Pcdh7	0.556608	0.062772	0.0177776	0.0459253	43
Cx3cl1	0.554415	0.0623479	0.0173535	0.0458665	44
Rps19	0.550393	0.0678674	0.022873	0.045521	45
Copa	0.549646	0.0637589	0.0187646	0.0444033	46
Psen1	0.540077	0.0648989	0.0199045	0.0437858	47
Ttr	0.546411	0.0666278	0.0216334	0.0436035	48
Calm1	0.554698	0.0613592	0.0163649	0.0432492	49
Lrpap1	0.551897	0.0625649	0.0175705	0.0432222	50
Fn1	0.560779	0.0634409	0.0184465	0.0430573	51
Gpi1	0.555977	0.0623591	0.0173647	0.042928	52
Arf1	0.548032	0.0666012	0.0216068	0.0419458	53
Calr	0.556226	0.0687807	0.0237863	0.0409346	54
Serpine2	0.541972	0.0627673	0.017773	0.0402805	55
Col1a1	0.556222	0.0573784	0.012384	0.0400458	56
Ptn	0.553572	0.0621268	0.0171325	0.0396226	57
Fbn1	0.553538	0.0616291	0.0166348	0.0395747	58
Cdh5	0.55294	0.0582785	0.0132841	0.0395356	59
Penk	0.540045	0.0628241	0.0178297	0.0381387	60
Rspo3	0.546264	0.0587253	0.0137309	0.0378714	61
Grn	0.555083	0.0575377	0.0125433	0.0378616	62
Sema3f	0.549681	0.0635219	0.0185275	0.0368952	63
Kitl	0.549547	0.0588762	0.0138818	0.0367045	64
Lamb2	0.540507	0.0584623	0.0134679	0.0359468	65
Igf2	0.5507	0.060133	0.0151386	0.0358706	66
Rtn4	0.546393	0.0605988	0.0156045	0.0354314	67
Nenf	0.542706	0.0624189	0.0174245	0.0334232	68
Adam9	0.53515	0.0649519	0.0199576	0.0328533	69
Cldn11	0.533027	0.0624955	0.0175011	0.0302202	70
Aimp1	0.533085	0.0585602	0.0135658	0.0301613	71
Clec11a	0.530397	0.0605605	0.0155661	0.0276746	72
Jag1	0.551717	0.0592956	0.0143012	0.0260797	73
Manf	0.538537	0.0584649	0.0134706	0.0258608	74
Ptprm	0.532413	0.0527333	0.00773888	0.0240296	75
Ntn1	0.531167	0.0565764	0.011582	0.0239566	76
Mdk	0.534739	0.0560261	0.0110318	0.0231544	77
Hsp90b1	0.528116	0.0563298	0.0113354	0.0223932	78
Psap	0.514071	0.0608017	0.0158074	0.0219545	79
Nid1	0.534849	0.0526926	0.00769822	0.0212349	80
Nucb2	0.521752	0.0597186	0.0147242	0.020879	81
Cyr61	0.525203	0.0552386	0.0102443	0.0201807	82
Lama2	0.567594	0.0699183	0.0249239	0.0197142	83
Igf1	0.543597	0.0566143	0.0116199	0.0157055	84
Mif	0.551631	0.0572995	0.0123052	0.0155118	85
Fbrs	0.506439	0.0519637	0.00696933	0.00902306	86
Adam15	0.506203	0.0509379	0.00594353	0.00178658	87
Clstn1	0.487612	0.0517218	0.00672737	-0.00885895	88
Ptdss1	0.481817	0.0449782	-1.61322e-05	-0.0163423	89
