# Supplementary material for: The meningeal transcriptional response to traumatic brain injury and aging
Source: eLife. 2023 Jan 3;12:e81154. doi: 10.7554/eLife.81154 (PMC9810333; doi:10.7554/eLife.81154)
Supplement: Figure 3—source data 2. [file elife-81154-fig3-data2.xlsx]

## Sheet: Sheet1
	baseMean	log2FoldChange	lfcSE	stat	pvalue	padj	response
Lars2	11.4308	-1.52179	0.174513	90.6467	1.71758e-21	1.97865e-18	down
Srrm2	2.78373	-0.54958	0.17254	79.3871	5.10591e-19	2.94101e-16	down
Hbb-bs	2.118	-2.26349	0.308771	69.1942	8.92315e-17	3.42649e-14	down
Ube2d3	1.67312	-0.758961	0.211861	59.732	1.08695e-14	3.13041e-12	down
Prrc2c	1.55493	-0.312814	0.221365	57.7745	2.93961e-14	6.77287e-12	down
Hnrnpa2b1	3.47164	-0.308905	0.142996	54.4715	1.57716e-13	3.02816e-11	down
Rsrp1	2.38653	-0.158805	0.155279	48.474	3.34705e-12	4.81975e-10	down
Mef2a	1.1098	-0.718785	0.25113	45.158	1.81761e-11	2.09389e-09	down
Nfib	1.37137	-0.319449	0.225518	44.0273	3.23824e-11	3.10871e-09	down
Ddx5	4.42214	-0.558469	0.163329	42.4068	7.41333e-11	6.56935e-09	down
Rbms1	1.95558	-0.352772	0.208605	40.7837	1.70043e-10	1.35263e-08	down
Csnk1a1	1.59401	-0.240549	0.201215	40.7151	1.76124e-10	1.35263e-08	down
Sptbn1	2.32934	-0.560141	0.170907	40.1425	2.361e-10	1.69992e-08	down
Kmt2e	1.34599	-0.354566	0.200801	39.4457	3.37314e-10	2.15881e-08	down
Pafah1b1	1.08271	-0.157129	0.220548	38.5589	5.31258e-10	3.2211e-08	down
Hnrnpu	1.36437	-0.220486	0.224715	38.2726	6.15194e-10	3.37478e-08	down
Macf1	2.20085	-0.113149	0.225705	38.3217	5.9993e-10	3.37478e-08	down
Afdn	0.903263	-0.8565	0.272487	36.9577	1.20721e-09	6.04653e-08	down
Pnisr	2.43563	-0.801968	0.239395	36.8682	1.26389e-09	6.06669e-08	down
Rbm39	3.98482	-0.0692589	0.153878	35.3868	2.7031e-09	1.19768e-07	down
Sf3b1	1.394	-0.253661	0.218111	35.0837	3.15836e-09	1.34757e-07	down
Bicc1	1.43796	-0.405241	0.232223	34.46	4.35102e-09	1.67079e-07	down
Eif4a2	1.14297	-0.382089	0.195533	34.5262	4.20562e-09	1.67079e-07	down
Zbtb20	5.00082	-0.43959	0.178335	34.5234	4.21151e-09	1.67079e-07	down
Snrnp70	2.78374	-0.147353	0.202021	34.31	4.69962e-09	1.74644e-07	down
Rbm25	1.61734	-0.575152	0.260609	34.1672	5.05734e-09	1.82064e-07	down
Ube3a	0.829572	-0.0920392	0.267436	33.2861	7.95473e-09	2.61824e-07	down
Nktr	2.17478	-0.726737	0.254023	32.7666	1.03914e-08	3.27484e-07	down
Ddx17	2.68813	-0.551307	0.233148	32.7431	1.05181e-08	3.27484e-07	down
Bclaf1	1.49449	-0.649675	0.246021	32.3989	1.25559e-08	3.80641e-07	down
Hnrnpa3	1.11851	-0.470428	0.219112	32.3359	1.29696e-08	3.83101e-07	down
Thra	0.959929	-0.281082	0.200104	32.2799	1.33487e-08	3.84443e-07	down
Ahnak	2.28088	-0.383169	0.179106	30.9273	2.67874e-08	6.85757e-07	down
Rassf2	1.57735	-0.348802	0.229208	30.7244	2.97397e-08	7.2894e-07	down
Hnrnph1	1.74207	-0.123166	0.248282	30.3058	3.69014e-08	8.67559e-07	down
Top1	1.04342	-0.206639	0.230173	30.0644	4.17923e-08	9.62894e-07	down
Nsd1	1.3523	-0.510828	0.25994	29.4527	5.72988e-08	1.29428e-06	down
Rbm5	1.84702	-0.185746	0.248292	29.3338	6.09228e-08	1.32421e-06	down
Prkcd	0.795936	-0.210086	0.263252	28.8597	7.78148e-08	1.62987e-06	down
Selenok	0.874984	-0.050996	0.159616	28.699	8.45491e-08	1.70878e-06	down
Prrx1	1.70372	-0.342052	0.216279	28.5864	8.96104e-08	1.77985e-06	down
Lpp	0.962381	-0.33526	0.247723	28.4091	9.82028e-08	1.88549e-06	down
Wnk1	1.82414	-0.147347	0.231985	28.2919	1.04332e-07	1.97034e-06	down
Tln1	0.682125	-0.421385	0.234534	27.8248	1.32812e-07	2.46772e-06	down
Arhgap31	1.07079	-0.140315	0.255839	27.7029	1.41454e-07	2.58658e-06	down
Tpr	0.816281	-0.0093213	0.226063	27.4782	1.58875e-07	2.81575e-06	down
Foxp1	2.03552	-0.337985	0.192904	27.3347	1.71114e-07	2.98672e-06	down
Etnk1	1.22096	-0.136647	0.28754	27.2153	1.82013e-07	3.12954e-06	down
Ndufa4	1.0909	-0.0355242	0.165166	27.1268	1.90536e-07	3.18289e-06	down
Ttc3	1.3986	-0.241453	0.252526	27.0275	2.00578e-07	3.30095e-06	down
Tcf4	1.12507	-0.353014	0.256511	26.9299	2.10971e-07	3.42307e-06	down
Itch	1.18066	-0.600388	0.286773	26.8156	2.23823e-07	3.54268e-06	down
Pbx1	2.00739	-0.113674	0.236082	26.4002	2.77517e-07	4.26267e-06	down
Luc7l2	2.87728	-0.596175	0.21388	26.0709	3.29115e-07	4.73925e-06	down
Cd81	2.80913	-0.0367903	0.122318	26.0409	3.34259e-07	4.75391e-06	down
Srek1	1.38412	-0.271103	0.271949	25.9908	3.43049e-07	4.76135e-06	down
Pdgfrb	1.68285	-0.388806	0.244116	25.8643	3.66282e-07	5.0233e-06	down
Hp1bp3	0.754099	-0.264698	0.215884	25.8254	3.73733e-07	5.06519e-06	down
Ndufa2	0.542394	-0.277775	0.193797	25.7174	3.95239e-07	5.29437e-06	down
Dtx3	1.557	-0.082861	0.209201	25.3928	4.67654e-07	6.19238e-06	down
Eif4g2	1.06632	-0.248443	0.183965	25.11	5.41526e-07	7.00941e-06	down
Eif2s2	0.756379	-0.274964	0.225757	24.9602	5.85273e-07	7.4915e-06	down
Rrbp1	2.52744	-0.194988	0.157738	24.77	6.45965e-07	7.9108e-06	down
Mbnl1	1.71268	-0.494472	0.225082	24.8085	6.33173e-07	7.9108e-06	down
Fus	3.87064	-0.315538	0.198944	24.751	6.52366e-07	7.9108e-06	down
Mycbp2	1.98385	-0.357254	0.253672	24.5226	7.34424e-07	8.78066e-06	down
Cstb	0.394845	-0.0302171	0.234439	24.3559	8.00792e-07	9.30986e-06	down
Ttc14	1.50289	-0.140475	0.277351	24.1814	8.76751e-07	9.90213e-06	down
Cox4i1	1.4437	-0.018757	0.146515	24.1042	9.12597e-07	1.01088e-05	down
Nfat5	2.06055	-0.809879	0.25045	23.5478	1.21849e-06	1.29972e-05	down
Elob	0.944251	-0.0018945	0.157263	23.4034	1.31344e-06	1.36314e-05	down
Camk2d	1.37453	-0.35475	0.244762	23.3337	1.36193e-06	1.40084e-05	down
Srsf5	2.10549	-0.146536	0.214053	23.2643	1.41193e-06	1.43942e-05	down
Malat1	320.193	-0.901993	0.200728	23.2235	1.44222e-06	1.4574e-05	down
Rab14	1.05798	-0.207069	0.186879	23.0939	1.54281e-06	1.5062e-05	down
2810474O19Rik	0.935329	-0.852149	0.345578	23.0967	1.54053e-06	1.5062e-05	down
Nedd4	3.93521	-0.0603804	0.124189	23.1116	1.52862e-06	1.5062e-05	down
Mbnl2	1.39996	-0.220731	0.215282	22.9224	1.68678e-06	1.61931e-05	down
Zfhx3	0.908923	-0.380331	0.256069	22.7373	1.85729e-06	1.76826e-05	down
Pkd1	1.24998	-0.342615	0.237904	22.4011	2.21248e-06	2.07217e-05	down
Med28	0.275704	-0.00566364	0.267538	22.2071	2.44773e-06	2.25583e-05	down
Vps13a	1.18466	-0.458069	0.253623	22.1049	2.58145e-06	2.32331e-05	down
Ndufs5	0.403675	-0.687533	0.200978	22.0395	2.67092e-06	2.33098e-05	down
Cald1	3.70634	-0.422793	0.149822	21.9644	2.77756e-06	2.37019e-05	down
Sned1	1.90665	-0.870902	0.280948	21.8128	3.00587e-06	2.54615e-05	down
Cped1	1.46451	-0.289267	0.27405	21.4166	3.69557e-06	3.01936e-05	down
Phldb2	1.21586	-0.483646	0.256889	21.3691	3.78824e-06	3.07327e-05	down
Mtdh	1.15359	-0.223323	0.187163	21.2923	3.94304e-06	3.14645e-05	down
Son	6.50112	-0.214254	0.166329	21.2839	3.96037e-06	3.14645e-05	down
1110008F13Rik	0.239807	-0.266734	0.273408	21.1236	4.30594e-06	3.35165e-05	down
Fmo1	0.926374	-0.0676515	0.24389	20.8982	4.84353e-06	3.69519e-05	down
Atox1	0.626544	-0.0873387	0.207682	20.8169	5.0534e-06	3.81368e-05	down
Maf	1.31069	-0.30192	0.245699	20.7913	5.12143e-06	3.8311e-05	down
Ogt	2.00764	-0.412028	0.24925	20.6626	5.47753e-06	4.07104e-05	down
Rbp1	1.40646	-0.0572381	0.169425	20.6307	5.56959e-06	4.11293e-05	down
Gstm5	0.507239	-0.375696	0.229529	20.4222	6.21053e-06	4.52818e-05	down
Tra2a	1.54975	-0.0301371	0.259057	20.1952	6.99295e-06	5.06659e-05	down
Bnc2	1.24324	-0.161365	0.276607	20.134	7.22012e-06	5.19849e-05	down
Smarca2	0.938496	-0.16881	0.225611	20.1199	7.27369e-06	5.20453e-05	down
Il6st	0.869919	-0.613239	0.198938	20.0356	7.60144e-06	5.37231e-05	down
Sec31a	0.664296	-0.0829835	0.236485	19.9053	8.13763e-06	5.71619e-05	down
Sub1	0.665794	-0.0218099	0.19545	19.7414	8.86608e-06	6.02885e-05	down
Srsf7	1.16531	-0.20646	0.234951	19.7348	8.89673e-06	6.02885e-05	down
Atp6v0a1	1.04559	-0.154955	0.275005	19.2319	1.15763e-05	7.53439e-05	down
Foxd1	1.77388	-0.356355	0.221881	19.0882	1.24817e-05	8.03289e-05	down
Ndufb6	0.305728	-0.491538	0.232612	18.6893	1.53844e-05	9.57993e-05	down
Hectd1	0.753213	-0.0471241	0.239294	18.6524	1.56846e-05	9.71433e-05	down
Dad1	0.866989	-0.0750022	0.154045	18.538	1.6655e-05	0.000101745	down
Tmed10	0.968783	-0.170599	0.146455	18.4118	1.77954e-05	0.000107896	down
Sh3glb1	0.603999	-0.24091	0.232161	17.9727	2.24101e-05	0.000131192	down
C1qtnf5	0.310976	-0.383528	0.276813	17.9176	2.30682e-05	0.00013354	down
Sesn3	0.825959	-0.373233	0.239397	17.6793	2.61459e-05	0.000150601	down
Anxa2	1.67375	-0.0327397	0.155066	17.4545	2.94268e-05	0.000165764	down
Tgfb1i1	0.849407	-0.295854	0.236664	17.3549	3.10092e-05	0.000171743	down
Sh3pxd2a	1.48596	-0.26103	0.257584	17.357	3.09758e-05	0.000171743	down
Apbb2	0.816216	-0.132598	0.303193	17.2745	3.23498e-05	0.000177462	down
4931406P16Rik	0.98611	-0.130771	0.305016	17.275	3.23409e-05	0.000177462	down
Lima1	1.088	-0.159067	0.227354	17.13	3.49069e-05	0.000187036	down
Tra2b	0.81209	-0.154542	0.256075	17.1316	3.48768e-05	0.000187036	down
Arf1	0.635698	-0.0892305	0.180063	17.0016	3.73485e-05	0.000199192	down
Ube2b	0.815057	-0.361767	0.211648	16.8768	3.98861e-05	0.000209812	down
Gabarap	1.40897	-0.0693217	0.141558	16.8274	4.09381e-05	0.000214367	down
Lrp6	1.65411	-0.114954	0.20889	16.6195	4.5679e-05	0.000234921	down
Gpc6	1.25108	-0.254937	0.271819	16.4126	5.09456e-05	0.000256285	down
Grcc10	0.503505	-0.217794	0.201651	16.1932	5.71981e-05	0.000278026	down
Neo1	1.25458	-0.139123	0.220838	16.124	5.93273e-05	0.000287164	down
Gm42418	133.022	-0.51773	0.13413	16.0831	6.06222e-05	0.000290987	down
Hspa8	2.86231	-0.263331	0.138408	15.9772	6.41095e-05	0.000306449	down
Sptan1	0.8689	-0.0894183	0.244428	15.8804	6.74729e-05	0.00031726	down
S100a10	0.59569	-0.203837	0.232582	15.887	6.72384e-05	0.00031726	down
Ndfip1	0.781834	-0.0293299	0.172047	15.8456	6.87267e-05	0.000321842	down
B2m	1.29374	-0.346762	0.164195	15.752	7.22129e-05	0.000336003	down
Tmco1	0.324056	-0.140284	0.249217	15.2957	9.19274e-05	0.000413673	down
Rabac1	1.22257	-0.0663162	0.14226	15.2413	9.46093e-05	0.000422442	down
Kif1b	0.983709	-0.20192	0.254375	15.218	9.57866e-05	0.000426047	down
Hdlbp	0.839889	-0.14057	0.211993	15.1536	9.91072e-05	0.000435769	down
Dap	0.249957	-0.25832	0.288278	15.0423	0.000105131	0.000455304	down
Tmem30a	0.864271	-0.258149	0.200905	15.0151	0.000106654	0.000460169	down
Rpl10	2.22525	-0.185095	0.145075	14.9106	0.000112727	0.000477431	down
Wls	1.2047	-0.13413	0.200763	14.9137	0.000112542	0.000477431	down
Per3	1.02505	-0.185499	0.312047	14.9175	0.000112314	0.000477431	down
Prnp	0.632503	-0.227743	0.204063	14.8878	0.000114095	0.000481458	down
Klf3	0.707886	-0.0386988	0.300977	14.7455	0.000123042	0.000511711	down
Smim14	0.879669	-0.455478	0.179375	14.6605	0.000128715	0.000529571	down
Rpl17	1.39148	-0.25224	0.183799	14.6667	0.000128291	0.000529571	down
Clec2d	1.09567	-0.220244	0.26	14.6157	0.00013181	0.000534666	down
Cltc	0.690027	-0.131736	0.232886	14.6311	0.000130742	0.000534666	down
Mlec	0.714328	-0.46642	0.210713	14.5547	0.000136147	0.000548396	down
H3f3b	2.748	-0.0611434	0.117818	14.4614	0.000143061	0.000570265	down
Smdt1	0.544808	-0.477448	0.193622	14.3712	0.000150082	0.00059038	down
mt-Nd3	4.01799	-0.103471	0.175466	14.3306	0.000153351	0.00059885	down
Pcdh7	1.12797	-0.272261	0.260762	14.2706	0.000158318	0.000616155	down
Lrrc58	1.07536	-0.36825	0.187471	14.1807	0.000166069	0.000643219	down
Rpl14	1.14693	-0.120114	0.180423	14.1078	0.000172629	0.000660692	down
Rtn3	0.809072	-0.206652	0.196611	14.1105	0.000172381	0.000660692	down
Slc12a2	0.967487	-0.270138	0.24367	14.0956	0.000173747	0.000662768	down
Ubb	5.04256	-0.0222586	0.114673	14.0118	0.000181668	0.00068617	down
Ppia	2.92502	-0.0920824	0.135894	13.9894	0.000183844	0.00069212	down
Rps15a	1.6779	-0.0173377	0.180545	13.8977	0.000193038	0.000724365	down
Cfl1	0.806817	-0.0304423	0.184543	13.8415	0.000198891	0.000743904	down
Myh9	0.754065	-0.541534	0.230833	13.7824	0.000205251	0.00076274	down
Wdr83os	0.286388	-0.0455282	0.264857	13.7514	0.000208665	0.000772932	down
Ndufc1	0.389687	-0.0465746	0.246146	13.6762	0.000217191	0.000801935	down
Kcnq1ot1	4.34675	-0.634797	0.263403	13.604	0.00022571	0.000826215	down
Nr3c1	0.857252	-0.387933	0.209348	13.6022	0.000225918	0.000826215	down
Scd2	1.03157	-0.0924436	0.222438	13.5535	0.000231855	0.000842576	down
Degs1	0.534554	-0.394701	0.197006	13.4937	0.000239367	0.000867139	down
Manf	0.577116	-0.255887	0.210858	13.4435	0.000245859	0.000879595	down
Ebf1	2.31527	-0.35523	0.232928	13.3638	0.000256529	0.000906509	down
Sec61a1	0.789457	-0.30991	0.210579	13.2981	0.000265677	0.00093311	down
Txn1	0.329266	-0.324398	0.244646	13.2558	0.000271743	0.000950905	down
St13	0.621556	-0.0953611	0.229301	13.2209	0.000276842	0.000963509	down
Bcap31	0.847723	-0.0156537	0.167264	13.1083	0.000293993	0.00101098	down
mt-Nd6	0.829742	-0.494845	0.329057	13.0705	0.000299983	0.00102243	down
Clk1	2.37247	-0.0716813	0.223438	13.0048	0.000310697	0.00105582	down
Serbp1	0.73453	-0.00731115	0.204796	12.962	0.000317882	0.00107076	down
Mpp6	0.820533	-0.0806672	0.272157	12.82	0.000342931	0.00114842	down
Dclk1	0.786574	-0.186029	0.313223	12.7801	0.000350317	0.00115967	down
AY036118	2.36336	-0.903042	0.269835	12.7848	0.000349453	0.00115967	down
Rps17	0.63186	-0.0709932	0.204705	12.6617	0.000373232	0.00123199	down
Ddit4	0.344957	-1.07113	0.330204	12.6048	0.00038476	0.00126641	down
Dennd4a	0.823167	-0.400771	0.339225	12.49	0.000409132	0.00133898	down
Foxc1	0.567744	-0.178949	0.254528	12.4917	0.000408774	0.00133898	down
Pgam1	0.336575	-0.171843	0.254639	12.4439	0.000419357	0.00136469	down
Ubl5	0.682618	-0.0349474	0.188923	12.4257	0.000423462	0.00137416	down
Marcks	0.817078	-0.406166	0.249173	12.2986	0.000453289	0.00144651	down
Sdf2	0.461903	-0.127855	0.205372	12.2412	0.000467449	0.00148348	down
Foxp2	2.50305	-0.0312864	0.221255	12.0696	0.000512505	0.00160873	down
mt-Nd4	12.5059	-0.125085	0.138263	11.8568	0.000574517	0.00175091	down
Col4a1	0.962955	-0.267565	0.277936	11.7338	0.000613761	0.00185578	down
Ptms	1.14895	-0.387308	0.161444	11.6575	0.000639434	0.00192331	down
Hsp90ab1	3.80559	-0.376154	0.1166	11.49	0.000699704	0.00206682	down
Calm1	1.1213	-0.140716	0.166351	11.4357	0.00072046	0.00210652	down
Mat2a	0.618347	-0.5197	0.259389	11.3677	0.000747318	0.00217402	down
Mical2	0.612649	-0.251725	0.359545	11.3095	0.00077113	0.00223764	down
Ahnak2	0.579221	-0.218377	0.417178	11.1473	0.000841553	0.00242975	down
Arf4	0.920295	-0.257075	0.172456	10.9788	0.00092159	0.00263442	down
Klf9	1.27397	-0.0318815	0.208543	10.9296	0.000946408	0.00268538	down
Spats2l	0.545299	-0.27391	0.26014	10.8637	0.000980678	0.00277578	down
Zfp36l1	2.36635	-0.372749	0.177176	10.827	0.0010003	0.00282438	down
Six1	0.579422	-0.459347	0.263594	10.8176	0.00100542	0.00282638	down
Slc7a2	1.07641	-0.19429	0.259314	10.7698	0.00103169	0.00288473	down
Ctsh	0.924725	-0.0651344	0.189066	10.7157	0.00106231	0.00295599	down
Ctnnb1	0.876483	-0.347908	0.176816	10.6467	0.00110269	0.0030536	down
Itm2a	1.80014	-0.0205663	0.172792	10.6032	0.0011289	0.00311124	down
Fgfr1	1.09931	-0.273363	0.204938	10.5608	0.0011551	0.00316828	down
Arhgap20	0.430992	-0.394506	0.416667	10.5396	0.00116841	0.00319716	down
Rtraf	0.36493	-0.23448	0.230022	10.4989	0.00119445	0.00326067	down
Dnaja1	0.940906	-0.201009	0.178491	10.4848	0.00120363	0.00327796	down
mt-Nd5	7.24095	-0.186178	0.158214	10.4773	0.0012085	0.00327948	down
Col5a2	1.38051	-0.312541	0.22382	10.4413	0.00123227	0.00332351	down
Hivep3	0.835016	-0.0450203	0.342237	10.4333	0.00123766	0.00332351	down
Pgrmc1	0.756223	-0.317537	0.200939	10.2851	0.0013411	0.003568	down
Wfdc1	0.637445	-0.0718449	0.234393	10.2875	0.00133935	0.003568	down
Fat4	0.84274	-0.175474	0.302045	10.1396	0.00145121	0.003819	down
S100a11	1.0663	-0.0304174	0.204865	10.1385	0.00145202	0.003819	down
Eef1a1	5.35921	-0.0282797	0.128969	10.1321	0.00145711	0.0038207	down
Romo1	0.534947	-0.153674	0.206078	10.1142	0.00147134	0.00382615	down
Lamp2	1.08591	-0.29379	0.163052	10.1041	0.00147937	0.00383836	down
Rps23	1.30057	-0.00850218	0.179618	9.91694	0.00163765	0.00422051	down
Car13	1.19804	-0.304823	0.221778	9.66257	0.00188061	0.00479124	down
Oasl2	0.456507	-0.0676289	0.385001	9.54952	0.00200002	0.00507494	down
Tecr	0.761886	-0.101297	0.172133	9.40869	0.0021596	0.00544389	down
Tpm4	0.496366	-0.59444	0.228161	9.35467	0.00222418	0.00555804	down
Sppl2a	0.483325	-0.20693	0.273518	9.32373	0.00226205	0.00564044	down
Egfr	2.09593	-0.155981	0.210766	9.2872	0.0023076	0.0057169	down
Ptma	1.65386	-0.166216	0.15697	9.13708	0.0025048	0.00617887	down
Glg1	1.08306	-0.115944	0.208495	9.125	0.00252139	0.00620651	down
Map1b	2.51082	-0.361203	0.20603	9.10888	0.00254371	0.0062481	down
Slc4a4	0.811185	-0.313717	0.301785	9.08936	0.002571	0.0063017	down
Scara3	0.926672	-0.339861	0.235038	9.00133	0.00269784	0.00657063	down
Sec61g	0.963343	-0.0152598	0.184987	8.91385	0.00283016	0.00684946	down
Morf4l1	1.97413	-0.0437276	0.11631	8.8447	0.00293941	0.00706931	down
Ifitm3	1.69761	-0.0340024	0.186512	8.83278	0.00295868	0.00710083	down
Fkbp2	0.352941	-0.0809851	0.241748	8.81998	0.00297951	0.00713595	down
Ostc	0.471	-0.104981	0.209191	8.79304	0.00302383	0.00721211	down
Vcl	0.798879	-0.263272	0.313938	8.72182	0.00314424	0.00743772	down
P4ha1	0.623735	-0.0818302	0.216046	8.59323	0.00337415	0.00793269	down
Atp5d	0.830238	-0.0317426	0.177225	8.54573	0.00346333	0.00811493	down
Kifap3	0.611609	-0.273223	0.253618	8.44872	0.00365301	0.00851068	down
Mrfap1	0.607384	-0.344935	0.170529	8.43943	0.00367171	0.00851068	down
Uqcrq	0.50889	-0.0260205	0.211518	8.44833	0.00365379	0.00851068	down
Fat1	0.666546	-0.136134	0.29419	8.39291	0.00376687	0.00871371	down
Sparcl1	0.163147	-2.39675	0.935598	8.3482	0.0038607	0.0088773	down
Ntrk3	0.492368	-0.449833	0.344141	8.30126	0.00396176	0.00906325	down
Dpysl3	0.439317	-0.62819	0.279655	8.2997	0.00396517	0.00906325	down
Anapc11	0.51442	-0.145253	0.198831	8.27756	0.0040138	0.00915624	down
Ndrg1	0.792235	-0.349943	0.21597	8.19966	0.00418982	0.00952006	down
Plpp1	0.36522	-0.513286	0.258868	8.19564	0.00419911	0.0095224	down
Grb10	1.03914	-0.311524	0.244473	8.11338	0.00439398	0.0099058	down
Ogn	2.89955	-0.419555	0.168562	8.0374	0.00458211	0.0102897	down
Myl6	2.94414	-0.0718191	0.122781	8.01071	0.00465016	0.0104221	down
Rps12	1.53081	-0.0445245	0.189243	7.99697	0.00468558	0.0104608	down
Ndrg2	0.648552	-0.0147423	0.250486	7.96119	0.00477909	0.0105875	down
Cygb	0.717836	-0.561499	0.235814	7.8762	0.00500897	0.0110543	down
Sdc4	0.37248	-0.12391	0.258799	7.66652	0.00562549	0.0121359	down
Bace2	0.64462	-0.191217	0.222298	7.64444	0.00569476	0.0122432	down
Chmp2a	0.385138	-0.0150457	0.237281	7.62528	0.00575557	0.0123471	down
Rpl31	0.557693	-0.143784	0.217023	7.61111	0.00580096	0.0124214	down
Gstm1	0.626089	-0.0698668	0.266102	7.44354	0.00636644	0.0135566	down
Dkk3	0.486808	-0.0465083	0.310515	7.26607	0.00702693	0.0149355	down
Ralbp1	0.549668	-0.0544425	0.245298	7.25312	0.0070778	0.0150159	down
Rplp1	3.34865	-0.144809	0.136296	7.23055	0.00716733	0.01515	down
Fth1	8.36945	-0.0563432	0.124227	7.19581	0.0073074	0.0154178	down
Neat1	4.03588	-0.359338	0.232011	7.14242	0.00752813	0.0157967	down
Col11a1	0.723878	-0.24193	0.338832	7.11558	0.00764168	0.0159478	down
Gdi2	0.717707	-0.0567244	0.189333	7.07794	0.00780388	0.0161983	down
P4hb	0.958836	-0.142871	0.168114	7.00523	0.00812717	0.016839	down
Sf3b2	0.638441	-0.375158	0.194585	6.97339	0.00827308	0.0170799	down
Tpm1	1.62222	-0.061123	0.229148	6.91902	0.00852839	0.0175441	down
Pla2g4a	0.417059	-0.392404	0.326979	6.86982	0.00876635	0.0180015	down
Tmem158	0.178913	-0.71731	0.381815	6.83552	0.00893627	0.0183178	down
Abi3bp	1.33453	-0.425479	0.25085	6.71329	0.00956968	0.019512	down
Cd24a	0.164708	-2.1113	0.925446	6.67015	0.00980412	0.0198495	down
Pkdcc	0.948506	-0.161598	0.292678	6.6707	0.00980108	0.0198495	down
Rpl34	1.80261	-0.112063	0.172196	6.66388	0.00983865	0.0198844	down
Peg3	0.80518	-0.519461	0.398325	6.65033	0.00991376	0.0199313	down
Bmper	0.526301	-0.404337	0.326713	6.64349	0.00995186	0.0199731	down
Eef1g	0.431677	-0.181388	0.226277	6.53871	0.0105552	0.0211103	down
Rhoc	0.643239	-0.0926141	0.192525	6.35696	0.0116922	0.0230246	down
Tspan11	1.9424	-0.141524	0.173336	6.34527	0.0117695	0.0231373	down
Mmp14	1.12407	-0.322207	0.191788	6.29229	0.0121264	0.0237579	down
mt-Nd1	15.0492	-0.14206	0.137163	6.25748	0.012367	0.0241063	down
mt-Atp6	40.2801	-0.272984	0.128018	6.2517	0.0124074	0.0241073	down
Serpinb6a	0.491666	-0.15846	0.208335	6.19614	0.0128029	0.0247253	down
Plec	0.627798	-0.414784	0.266392	6.19578	0.0128055	0.0247253	down
Gja1	1.11208	-0.620677	0.261494	6.09649	0.013545	0.0260065	down
Sap18	0.487164	-0.0813876	0.210229	6.03314	0.0140397	0.0268222	down
Canx	1.08013	-0.24818	0.168081	5.99871	0.0143163	0.0272152	down
Pttg1ip	0.548666	-0.390936	0.198508	5.98141	0.0144574	0.0274228	down
Ndufb7	0.371354	-0.39757	0.224655	5.97561	0.0145051	0.0274381	down
Rpn2	0.930945	-0.081368	0.163088	5.95353	0.0146878	0.0277383	down
Fgfr2	0.63255	-0.485598	0.275482	5.93186	0.0148695	0.0280355	down
Fzd2	0.615045	-0.215074	0.236201	5.89198	0.01521	0.0285092	down
Cnbp	0.779826	-0.161797	0.164825	5.83748	0.0156883	0.0292442	down
Akr1a1	0.652767	-0.298307	0.173643	5.81996	0.0158453	0.0294892	down
Hmgcs2	0.572246	-0.113972	0.267833	5.70532	0.0169136	0.0312111	down
Calu	0.686538	-0.394195	0.199191	5.69214	0.017041	0.0313598	down
App	3.00539	-0.069559	0.143811	5.67165	0.0172412	0.0316272	down
Atxn7l3b	0.708186	-0.0852201	0.198945	5.60484	0.017911	0.0325448	down
Tmed9	0.695873	-0.297973	0.181332	5.52987	0.0186944	0.0337555	down
Srp14	0.546767	-0.302382	0.202284	5.49341	0.0190883	0.0343054	down
Akap12	0.727967	-0.529331	0.245337	5.44819	0.0195887	0.0350425	down
Atp5h	0.806787	-0.000312167	0.180427	5.35211	0.0206972	0.036852	down
Epas1	0.390653	-0.474959	0.284039	5.27187	0.0216728	0.0383518	down
Hmgb1	0.959008	-0.0963565	0.169567	5.25859	0.0218387	0.0385861	down
Saraf	0.838478	-0.278564	0.173936	5.19202	0.0226908	0.0398472	down
Rer1	0.476253	-0.0764567	0.206416	5.18071	0.022839	0.0400465	down
Gm973	0.668752	-0.549728	0.343919	5.04895	0.0246408	0.0425758	down
Igf2	0.197185	-0.55145	0.421331	5.04628	0.0246788	0.0425758	down
Ckap4	0.497145	-0.545763	0.237019	5.04563	0.0246881	0.0425758	down
Sh3bgrl3	0.398006	-0.249634	0.285052	5.00677	0.0252484	0.0432599	down
Adam33	0.379586	-0.0552319	0.475463	4.9835	0.0255901	0.0436092	down
Snrpb	0.488414	-0.103668	0.205447	4.97391	0.0257324	0.0437869	down
Gstm2	0.452765	-0.284814	0.250762	4.86999	0.0273277	0.0462858	down
Tax1bp1	0.953434	-0.228211	0.1717	4.85338	0.027592	0.046607	down
Errfi1	0.498275	-0.736344	0.444097	4.82489	0.0280517	0.0472449	down
Bst2	0.313121	-0.302059	0.33735	4.77374	0.028897	0.0485268	down
Cxcl14	0.158411	-0.261069	0.504595	4.74298	0.029418	0.0492581	down
Nav2	0.877147	-0.425716	0.38442	4.74027	0.0294644	0.0492641	down
Tcf25	1.61523	0.13663	0.203531	52.2189	4.96463e-13	8.17036e-11	up
Atp6v0c	1.00596	0.123744	0.176971	46.7415	8.09955e-12	1.03674e-09	up
Prdx1	1.22748	0.332811	0.167143	44.5451	2.48568e-11	2.60318e-09	up
Nisch	1.65465	0.289201	0.208026	39.4551	3.35697e-10	2.15881e-08	up
Ginm1	0.464944	0.276355	0.209539	37.0124	1.17378e-09	6.04653e-08	up
Ndufb11	0.714304	0.145754	0.174956	35.6912	2.31209e-09	1.06541e-07	up
Ptprs	1.25254	0.428743	0.27305	33.6597	6.56476e-09	2.2917e-07	up
Gng5	1.12449	0.350353	0.172499	33.5136	7.07667e-09	2.39774e-07	up
Chd9	1.1456	0.0270342	0.228094	31.7746	1.73146e-08	4.86498e-07	up
Sumo2	0.862683	0.270966	0.17586	31.6055	1.88897e-08	5.18118e-07	up
Selenof	1.05747	0.0903045	0.154391	31.5323	1.96148e-08	5.25494e-07	up
Ppib	1.69863	0.204841	0.137634	30.9421	2.65839e-08	6.85757e-07	up
Myl12a	1.04138	0.398688	0.177089	30.8387	2.80394e-08	7.02204e-07	up
Atp5g3	1.10698	0.311292	0.174064	30.5934	3.18166e-08	7.63599e-07	up
Lnpep	0.88682	0.0710923	0.258542	29.3565	6.02149e-08	1.32421e-06	up
Ifitm2	1.26032	0.0934084	0.173845	29.1546	6.68257e-08	1.42561e-06	up
Cbx5	0.875293	0.374427	0.278416	28.722	8.355e-08	1.70878e-06	up
Bloc1s1	0.4287	0.498749	0.256277	28.426	9.73503e-08	1.88549e-06	up
Dse	1.04825	0.480103	0.256488	27.5997	1.49203e-07	2.68566e-06	up
Wwp1	0.863287	0.140282	0.289679	27.1257	1.90642e-07	3.18289e-06	up
Cops6	0.189647	0.0999801	0.319517	26.8098	2.24493e-07	3.54268e-06	up
Eif3f	0.517725	0.226988	0.226508	26.5929	2.51171e-07	3.91012e-06	up
Nenf	1.34254	0.404673	0.162036	26.3206	2.89187e-07	4.32655e-06	up
Zic1	1.2136	0.0577998	0.23009	26.3325	2.87411e-07	4.32655e-06	up
Srsf11	1.9312	0.0368399	0.227647	26.1217	3.20557e-07	4.68195e-06	up
mt-Atp8	3.53185	0.572231	0.194602	26.1186	3.21072e-07	4.68195e-06	up
Ddx50	1.11648	0.11809	0.24917	26.0061	3.40338e-07	4.76135e-06	up
Atp5j	1.02182	0.15036	0.167576	25.277	4.96602e-07	6.50097e-06	up
Chd3	1.42474	0.108523	0.236093	24.7739	6.44631e-07	7.9108e-06	up
Pfn1	1.30764	0.205426	0.162924	24.784	6.41269e-07	7.9108e-06	up
Spcs1	0.88706	0.163188	0.163962	24.5098	7.39344e-07	8.78066e-06	up
Cox6b1	0.604174	0.223833	0.21208	24.4844	7.49124e-07	8.80602e-06	up
Cd302	1.02912	0.00935306	0.179255	24.3383	8.08147e-07	9.30986e-06	up
Cnpy2	0.649929	0.186103	0.189204	24.3116	8.19451e-07	9.34661e-06	up
Nop10	0.424819	0.125327	0.235514	24.1087	9.10494e-07	1.01088e-05	up
Nedd8	0.386033	0.329751	0.250428	24.057	9.35279e-07	1.02613e-05	up
Eif1	3.03475	0.0242419	0.111721	23.8757	1.02763e-06	1.11682e-05	up
Btf3	0.837672	0.263507	0.188217	23.6659	1.14594e-06	1.23376e-05	up
Rpl29	1.05248	0.394191	0.195411	23.4335	1.29309e-06	1.36314e-05	up
Hcfc1r1	0.366862	0.207209	0.246157	23.4128	1.30708e-06	1.36314e-05	up
D8Ertd738e	0.429487	0.0285996	0.214781	23.1981	1.46139e-06	1.46393e-05	up
Emp3	1.32916	0.00526996	0.173459	22.9513	1.66162e-06	1.60856e-05	up
Cox7a2	0.523533	0.0501889	0.205355	22.5992	1.99563e-06	1.8844e-05	up
Tpm3	0.712601	0.108487	0.229714	22.2206	2.43047e-06	2.25583e-05	up
Mxd4	1.33732	0.136273	0.1884	22.1684	2.49756e-06	2.28348e-05	up
Ndufa5	0.343026	0.630462	0.280373	22.1363	2.53968e-06	2.30371e-05	up
Mrps21	0.387094	0.558746	0.248889	22.0573	2.64637e-06	2.33098e-05	up
Ndufa13	1.10002	0.33351	0.163501	22.0488	2.6581e-06	2.33098e-05	up
Rpl27	0.796009	0.291478	0.207272	22.0556	2.64863e-06	2.33098e-05	up
Krtcap2	0.633667	0.0687543	0.197773	21.9653	2.77618e-06	2.37019e-05	up
Aldoa	1.44255	0.24744	0.155848	21.984	2.74926e-06	2.37019e-05	up
Tkt	0.354105	0.476985	0.267819	21.7766	3.06307e-06	2.57566e-05	up
Uqcrb	0.556372	0.329559	0.219416	21.5993	3.35969e-06	2.80461e-05	up
Itm2b	9.12627	0.294113	0.106787	21.5116	3.51687e-06	2.9147e-05	up
Rpl24	1.4889	0.276632	0.17116	21.4924	3.55228e-06	2.92302e-05	up
Clic1	0.846387	0.112718	0.178698	21.3267	3.87306e-06	3.12012e-05	up
Chd4	0.686221	0.17184	0.291921	21.2702	3.9889e-06	3.1474e-05	up
Rpl18	1.91008	0.266363	0.159743	21.1806	4.17973e-06	3.27554e-05	up
Psma2	0.338309	0.563517	0.278276	20.9821	4.63587e-06	3.58424e-05	up
Celf2	0.917164	0.0410959	0.282408	20.9532	4.70629e-06	3.61443e-05	up
Calm3	0.44935	0.831634	0.263904	20.8125	5.06504e-06	3.81368e-05	up
Pebp1	0.525048	0.276335	0.220652	20.4853	6.00897e-06	4.40913e-05	up
Tmem59	1.29414	0.29621	0.147695	20.0627	7.49432e-06	5.3293e-05	up
Rps3	1.50173	0.349328	0.184604	19.8722	8.27972e-06	5.78075e-05	up
Pmepa1	1.19161	0.0354119	0.225938	19.8443	8.40138e-06	5.83036e-05	up
Nme2	0.393224	0.339796	0.24003	19.8164	8.52477e-06	5.88056e-05	up
Tuba1b	0.993866	0.0286541	0.170683	19.7402	8.87175e-06	6.02885e-05	up
H3f3a	1.19375	0.176905	0.175947	19.5829	9.63262e-06	6.48934e-05	up
Tomm7	0.445075	0.708487	0.272943	19.4219	1.04797e-05	7.00531e-05	up
Rchy1	0.901437	0.234392	0.252988	19.4146	1.05201e-05	7.00531e-05	up
Fkbp1a	0.424353	0.00620932	0.229186	19.3034	1.1151e-05	7.38273e-05	up
Rpl4	0.598692	0.0850396	0.21649	19.2865	1.12497e-05	7.4055e-05	up
Ctsl	1.89398	0.331878	0.146335	19.2332	1.15685e-05	7.53439e-05	up
Tubb4b	0.494374	0.214143	0.237222	19.1063	1.23634e-05	8.00147e-05	up
Rpl7	1.02879	0.100448	0.203548	18.9331	1.35385e-05	8.56942e-05	up
Capzb	0.454759	0.244563	0.227583	18.9449	1.34549e-05	8.56942e-05	up
Rpl15	1.28385	0.10788	0.178735	18.9354	1.35223e-05	8.56942e-05	up
Laptm4a	3.697	0.0637663	0.102396	18.7331	1.50354e-05	9.46488e-05	up
Rpl37	2.45565	0.485895	0.166115	18.6914	1.53674e-05	9.57993e-05	up
Rpl3	1.20953	0.169283	0.186259	18.5962	1.61543e-05	9.95173e-05	up
Slc25a5	0.319544	0.451667	0.319171	18.5337	1.66926e-05	0.000101745	up
Pcbp2	1.84515	0.262409	0.147441	18.3896	1.80041e-05	0.00010859	up
Sat1	0.940263	0.0514461	0.303197	18.3718	1.8173e-05	0.000109038	up
Gabarapl2	0.438477	0.351319	0.231988	18.082	2.11592e-05	0.000126298	up
Ddr2	1.6602	0.0835348	0.211099	18.0395	2.16367e-05	0.000128482	up
Rpl22	1.00746	0.494924	0.213997	18.002	2.20668e-05	0.000130364	up
Fdx1	0.295789	0.811043	0.339055	17.9706	2.24348e-05	0.000131192	up
Rps25	0.521424	0.307408	0.239165	17.9237	2.29946e-05	0.00013354	up
Eef1b2	0.685166	0.332474	0.224583	17.6375	2.67269e-05	0.000153181	up
Uqcr11	0.762332	0.486093	0.204108	17.5613	2.78192e-05	0.000158652	up
Ltbp3	1.1058	0.238004	0.254986	17.5387	2.81512e-05	0.000159755	up
Rpl7a	1.1516	0.191457	0.18107	17.4499	2.94979e-05	0.000165764	up
Rps4x	2.4385	0.439602	0.171206	17.3951	3.0361e-05	0.000169786	up
Nfia	1.09803	0.397265	0.245808	17.2492	3.27834e-05	0.000178988	up
Rpl8	1.74254	0.20219	0.164287	17.2033	3.35858e-05	0.000182504	up
Dcaf8	0.928796	0.256799	0.301206	17.1936	3.37571e-05	0.000182574	up
Actr3	0.467437	0.42755	0.326521	16.9641	3.8094e-05	0.000202232	up
Nfix	1.3983	0.0578591	0.191183	16.9149	3.90931e-05	0.000206584	up
Lrpap1	0.877808	0.290831	0.188466	16.7862	4.18354e-05	0.000218074	up
Ndufc2	0.546851	0.154811	0.204545	16.7213	4.32924e-05	0.000224653	up
Atp6v1g1	0.40756	0.286029	0.235146	16.6833	4.41688e-05	0.000228172	up
Vkorc1	0.634484	0.0628553	0.208708	16.5843	4.65337e-05	0.000238252	up
Anxa5	1.27161	0.255801	0.162288	16.4285	5.052e-05	0.00025546	up
Bsg	2.93956	0.137405	0.135687	16.427	5.05598e-05	0.00025546	up
Tmem258	0.455494	0.139288	0.219756	16.4289	5.05083e-05	0.00025546	up
Dync1i2	0.703502	0.221107	0.287921	16.3748	5.19711e-05	0.000258821	up
Rpl11	2.08709	0.307987	0.155408	16.3705	5.20906e-05	0.000258821	up
Trmt112	0.488399	0.279903	0.218504	16.3693	5.21237e-05	0.000258821	up
Rps21	3.05391	0.20841	0.132847	16.3136	5.36767e-05	0.000265389	up
Fis1	0.505994	0.292103	0.219667	16.2714	5.4887e-05	0.000270213	up
2410015M20Rik	0.238404	0.475542	0.321562	16.2413	5.57643e-05	0.000273364	up
Abca1	1.13151	0.280975	0.267752	16.2171	5.64824e-05	0.000275711	up
Sec61b	0.576912	0.0165793	0.207104	16.0899	6.04041e-05	0.000290987	up
Nr2f2	0.838925	0.115416	0.339894	15.9449	6.52116e-05	0.000309151	up
Psma3	0.843515	0.0631861	0.194863	15.9527	6.49453e-05	0.000309151	up
Ergic3	1.01942	0.323944	0.171295	15.7488	7.23341e-05	0.000336003	up
Uqcc2	0.256787	0.00274363	0.286453	15.7354	7.28484e-05	0.000337034	up
Nxf1	0.944932	0.0558975	0.202665	15.7133	7.37051e-05	0.000339633	up
Hmgn2	0.426991	0.40508	0.255667	15.4161	8.62503e-05	0.000392729	up
Atp5b	0.948945	0.172869	0.173659	15.4281	8.57052e-05	0.000392729	up
Rps14	1.4382	0.157749	0.17644	15.4185	8.61426e-05	0.000392729	up
Sec62	1.32348	0.282532	0.15024	15.3497	8.9333e-05	0.000405164	up
H2afv	0.476507	0.595501	0.244818	15.3223	9.06379e-05	0.00040947	up
Ost4	0.866555	0.257161	0.17552	15.2537	9.39938e-05	0.000421326	up
Actg1	3.77741	0.266695	0.130431	15.1999	9.67104e-05	0.000428501	up
Zfp36l2	0.657202	0.158504	0.280055	15.1854	9.74518e-05	0.000430132	up
Skp1a	0.664503	0.00519336	0.195495	15.1026	0.000101822	0.000446004	up
Cryab	0.371414	0.328984	0.311333	15.0754	0.000103303	0.000449599	up
Reep5	1.39656	0.0430464	0.149247	15.0732	0.000103423	0.000449599	up
Lrp1	5.17438	0.414847	0.154817	14.9973	0.000107664	0.000462796	up
Selenom	1.25705	0.248653	0.161331	14.967	0.000109406	0.000468533	up
Ndufv3	0.463064	0.191417	0.234739	14.8788	0.000114643	0.000482004	up
Gapdh	0.851265	0.0223054	0.190097	14.8183	0.000118378	0.000495897	up
Tm2d2	0.519922	0.00778615	0.198599	14.7652	0.000121761	0.000508222	up
Flna	0.97811	0.0642831	0.255813	14.7003	0.000126024	0.000522228	up
Cox6a1	0.740908	0.0633953	0.180084	14.6287	0.000130904	0.000534666	up
Mif	0.500782	0.27268	0.251475	14.6181	0.000131645	0.000534666	up
Serf2	1.89361	0.0451736	0.128512	14.5695	0.000135084	0.000546022	up
Fxyd5	6.94743	0.230538	0.130152	14.5355	0.00013754	0.000550381	up
Rplp2	1.64396	0.114762	0.167971	14.5348	0.000137595	0.000550381	up
Rpl9	2.7839	0.290289	0.145972	14.4161	0.000146545	0.000582136	up
Rps9	1.8811	0.149792	0.169119	14.3967	0.000148065	0.000586155	up
Ldha	0.711343	0.457236	0.219747	14.3702	0.000150157	0.00059038	up
Rpl27a	1.94964	0.200216	0.162295	14.3636	0.000150686	0.000590444	up
Pfdn5	0.75136	0.258307	0.196518	14.177	0.000166388	0.000643219	up
Cd63	2.42964	0.176179	0.131935	14.1265	0.000170916	0.000658511	up
Slit2	1.56279	0.0551654	0.261035	14.0247	0.000180428	0.000685983	up
Mrc2	2.56927	0.0332924	0.178085	14.0162	0.000181238	0.00068617	up
Arhgap45	0.131497	16.8911	108.119	13.8015	0.000203173	0.000757461	up
Ubc	1.73111	0.0219292	0.132319	13.6578	0.000219334	0.000807261	up
Tmed3	0.666765	0.68785	0.226219	13.5539	0.000231807	0.000842576	up
Rpl32	1.62586	0.275269	0.20082	13.478	0.000241382	0.000868984	up
Oat	1.18601	0.0784785	0.167692	13.4779	0.000241385	0.000868984	up
Atp5c1	0.636959	0.186368	0.195652	13.4614	0.000243528	0.000873969	up
Gpx4	1.01806	0.0784908	0.172521	13.4327	0.000247271	0.000881906	up
Ndufb9	0.537832	0.053115	0.196855	13.3923	0.000252664	0.000898362	up
Ndufa1	0.340221	0.477352	0.28454	13.3852	0.000253615	0.000898969	up
Ptp4a2	0.931731	0.169497	0.22214	13.3388	0.000259974	0.000915871	up
Eif4a1	0.803228	0.359009	0.213139	13.2513	0.000272395	0.000950905	up
Atp6v1f	0.472407	0.190996	0.242827	13.1715	0.000284242	0.000983324	up
Islr	1.87632	0.0976246	0.15936	13.177	0.000283411	0.000983324	up
Abcd3	0.826507	0.532806	0.287457	13.1262	0.000291194	0.00100436	up
Snrpd2	0.290173	0.134587	0.286697	13.1021	0.000294968	0.00101132	up
Ndufb10	0.465829	0.0199192	0.210169	13.0724	0.000299685	0.00102243	up
Sptssa	0.366122	0.250799	0.244069	12.9946	0.000312394	0.00105789	up
Atp6v0e	0.738119	0.0664218	0.177378	12.9901	0.000313142	0.00105789	up
Cops9	0.384859	0.822469	0.289172	12.9391	0.000321793	0.00108078	up
Rpl36	1.97134	0.205258	0.170655	12.8087	0.000345018	0.00115206	up
S100a1	0.602933	0.0268597	0.240266	12.7957	0.000347424	0.00115674	up
Cox5b	0.804246	0.282691	0.197957	12.4776	0.000411856	0.00134408	up
Smpdl3a	0.818835	0.111452	0.186898	12.4141	0.000426095	0.00137883	up
Atp6v0b	0.995545	0.0258915	0.198242	12.3977	0.000429868	0.00138714	up
Rps5	1.90789	0.252392	0.175951	12.3509	0.00044077	0.00141439	up
Psmb3	0.431398	0.238333	0.225673	12.3538	0.000440085	0.00141439	up
Maged2	0.463501	0.262391	0.246978	12.323	0.000447419	0.00143174	up
Psmb5	0.349508	0.449064	0.275638	12.2651	0.000461518	0.0014687	up
Prkar1a	0.676286	0.061428	0.218346	12.1871	0.000481199	0.00152292	up
Dpm3	0.60261	0.0277471	0.196667	12.1049	0.000502885	0.00158664	up
Ndufa3	0.66756	0.344579	0.200425	12.1005	0.000504088	0.00158664	up
Tubb5	0.942601	0.231894	0.180573	12.0631	0.000514305	0.00161	up
Myl12b	0.704316	0.358664	0.206023	12.0544	0.000516711	0.00161315	up
Cyb5a	0.436581	0.0775329	0.233229	11.9846	0.000536408	0.00167011	up
Fau	3.19803	0.0317192	0.14294	11.9789	0.000538062	0.00167075	up
Rps27	2.01398	0.185968	0.1599	11.968	0.000541214	0.00167602	up
Rps18	1.05631	0.0705706	0.194919	11.93	0.000552363	0.00170596	up
Rcn1	0.475602	0.124593	0.272937	11.9078	0.000559005	0.00172185	up
Lamb2	1.40922	0.441898	0.227187	11.8953	0.000562747	0.00172876	up
Pid1	1.54669	0.0940361	0.247556	11.8814	0.000566958	0.00173706	up
Rpl39	2.20716	0.262036	0.173765	11.8618	0.000572957	0.00175078	up
Hint1	0.728173	0.373943	0.200822	11.8215	0.00058551	0.0017797	up
Rps7	1.64704	0.30731	0.19532	11.7831	0.000597709	0.001812	up
Tmem176b	1.83972	0.113063	0.149445	11.666	0.000636536	0.00191961	up
Rps16	2.2898	0.219023	0.168342	11.6411	0.000645093	0.00193126	up
Zic4	1.38589	0.0909245	0.295504	11.6402	0.00064543	0.00193126	up
Tubb2a	0.737121	0.286141	0.236964	11.6195	0.000652632	0.00194775	up
Auts2	2.97707	0.0362162	0.229043	11.5934	0.000661855	0.00196745	up
Ctsd	2.06547	0.11718	0.142474	11.5912	0.000662648	0.00196745	up
Ramp2	1.97424	0.167893	0.170286	11.5731	0.000669132	0.00198159	up
Rps13	1.55682	0.152271	0.181917	11.4798	0.000703549	0.00207286	up
Calm2	0.954409	0.18988	0.167463	11.4641	0.00070955	0.00208521	up
Rpl26	1.28242	0.139678	0.19096	11.4534	0.000713622	0.00209184	up
Rps10	2.42431	0.156122	0.163211	11.427	0.000723843	0.00211106	up
Ypel3	0.665431	0.788025	0.250776	11.1846	0.000824803	0.00238737	up
Rps27a	2.54139	0.214206	0.157613	11.0627	0.000880836	0.00253681	up
Mdh1	0.437535	0.321891	0.259699	11.056	0.000884011	0.0025396	up
Hmgn1	0.750759	0.293516	0.205629	11.0431	0.000890166	0.00255092	up
Rgs7bp	0.771032	0.444085	0.294072	10.9598	0.000931117	0.00265507	up
Ndufa7	0.733788	0.357052	0.202236	10.9468	0.000937637	0.00266706	up
Ftl1	5.03669	0.276973	0.128473	10.8166	0.00100592	0.00282638	up
Psmb1	0.451124	0.235735	0.23632	10.7889	0.00102109	0.00286203	up
Rplp0	2.19758	0.157101	0.169236	10.7503	0.00104264	0.0029083	up
Naca	1.10466	0.270588	0.182744	10.7062	0.00106777	0.00296403	up
Rpl19	2.54392	0.258241	0.150952	10.6129	0.00112301	0.00310243	up
Mrpl52	0.443544	0.317011	0.236949	10.5904	0.00113677	0.00312544	up
Ndufs7	0.447617	0.0834057	0.219638	10.4752	0.00120988	0.00327948	up
Stub1	0.716755	0.133564	0.206955	10.4509	0.00122588	0.00331506	up
Aldh2	1.19427	0.274183	0.164339	10.4365	0.0012355	0.00332351	up
Rps29	2.09425	0.294874	0.16785	10.3676	0.00128248	0.00343586	up
Ddost	0.807667	0.320337	0.185621	10.3145	0.00131991	0.00352793	up
Selenop	1.67192	0.51835	0.192561	10.2657	0.0013553	0.00359747	up
Cdon	0.768365	0.354386	0.284455	10.2066	0.0013994	0.00370468	up
Atp5g2	0.821828	0.00836437	0.179354	10.203	0.00140212	0.00370468	up
Ank2	3.90321	0.00610559	0.210717	10.1268	0.00146127	0.0038207	up
Cox8a	1.67748	0.0474279	0.149494	10.1251	0.00146261	0.0038207	up
Col16a1	1.13886	0.390248	0.255799	10.1167	0.00146935	0.00382615	up
Rps2	2.3371	0.236134	0.152333	10.0543	0.00151995	0.0039348	up
Lsp1	0.418348	0.143974	0.407662	9.96625	0.00159436	0.00411816	up
Col1a1	16.729	0.573268	0.175804	9.89629	0.00165613	0.00425861	up
Rps26	1.94055	0.138099	0.168061	9.88108	0.00166987	0.00428439	up
Rpl13	3.65685	0.176704	0.141103	9.81352	0.00173233	0.00443477	up
Glmp	0.624998	0.504863	0.208591	9.66478	0.00187834	0.00479124	up
Sdf4	0.920222	0.563344	0.188989	9.6592	0.00188405	0.00479124	up
Rps28	1.79939	0.304746	0.175825	9.48615	0.00207029	0.0052417	up
Chchd2	0.811224	0.428653	0.200623	9.45044	0.00211099	0.00533302	up
Mdh2	0.511302	0.385111	0.221054	9.39536	0.00217535	0.00547162	up
Nrp1	1.298	0.0512197	0.241288	9.38441	0.00218838	0.00549241	up
Acer3	0.554014	0.375169	0.347822	9.35822	0.00221987	0.00555804	up
Kdelr1	0.591794	0.0784819	0.196539	9.30548	0.0022847	0.0056846	up
Ahcyl2	1.03649	0.22354	0.284169	9.29079	0.00230309	0.0057169	up
Sem1	0.843161	0.120536	0.169956	9.19556	0.00242603	0.0059974	up
Serpinh1	3.78363	0.185628	0.136171	9.0387	0.00264324	0.00646499	up
Rps11	1.90537	0.064017	0.1734	9.0189	0.00267202	0.00652154	up
Cyba	0.642642	0.279271	0.231978	8.97902	0.00273098	0.00663731	up
Uqcrh	0.663228	0.061884	0.210856	8.97088	0.00274317	0.00665291	up
Uqcr10	0.525874	0.111122	0.230461	8.87904	0.00288464	0.00696667	up
Usmg5	0.557188	0.0299437	0.224624	8.8653	0.00290642	0.0070046	up
Tspo	0.433002	0.366983	0.267177	8.7956	0.00301958	0.00721211	up
Arl6ip5	0.426461	0.134687	0.228671	8.78453	0.00303796	0.00723085	up
Rpl28	2.30783	0.0304382	0.154768	8.75499	0.00308755	0.00733374	up
Rpl21	2.73808	0.171521	0.157171	8.72743	0.00313457	0.0074301	up
S100b	0.581277	0.120765	0.239474	8.64753	0.00327505	0.00773126	up
Vdac1	0.628962	0.120396	0.219488	8.59736	0.00336651	0.00793091	up
Snx2	0.580586	0.229236	0.253927	8.54446	0.00346575	0.00811493	up
Rps8	3.58416	0.188471	0.145394	8.44297	0.00366457	0.00851068	up
Loxl1	1.51744	0.587456	0.205932	8.44413	0.00366224	0.00851068	up
Rpl35	1.60454	0.169232	0.17309	8.3763	0.00380145	0.00877489	up
Rpl23	2.38744	0.051456	0.160038	8.37291	0.00380855	0.00877489	up
Tm4sf1	0.565591	0.0703374	0.286047	8.33262	0.00389394	0.0089359	up
Rpl30	2.26341	0.0812873	0.160482	8.20071	0.0041874	0.00952006	up
Rbm3	0.610732	0.0772778	0.236292	8.1757	0.00424553	0.00960875	up
Tmbim6	1.60749	0.105181	0.129948	8.13129	0.00435078	0.00982765	up
Fcer1g	0.316809	3.25637	1.1488	8.0506	0.00454887	0.010235	up
Rpl38	1.8147	0.251546	0.172953	8.00504	0.00466475	0.0104345	up
1500015O10Rik	4.15921	0.223659	0.185376	7.98035	0.00472877	0.0105368	up
Rps3a1	2.40858	0.0652267	0.160443	7.97148	0.00475202	0.0105496	up
Cd9	1.13669	0.138226	0.239326	7.97117	0.00475281	0.0105496	up
H2afj	0.432385	0.281826	0.237207	7.90987	0.00491658	0.0108712	up
Fkbp7	0.60111	0.0769577	0.219255	7.85727	0.00506167	0.0111068	up
2010107E04Rik	0.455774	0.196498	0.245755	7.85761	0.00506072	0.0111068	up
H2-Ab1	0.336306	2.1303	0.741159	7.86375	0.00504357	0.0111068	up
Ndufb4	0.595407	0.290506	0.215632	7.82778	0.00514492	0.011268	up
H2-DMb1	0.173729	0.608341	0.442355	7.81756	0.00517409	0.0113103	up
Atp5g1	0.442373	0.0600151	0.239428	7.76533	0.00532586	0.0116201	up
Serpinf1	4.77662	0.342601	0.164417	7.74315	0.00539166	0.0117414	up
Fcgrt	2.01796	0.210896	0.135908	7.7217	0.0054561	0.0118593	up
Rpl36a	0.963705	0.374717	0.210177	7.71726	0.00546952	0.0118661	up
Tpt1	3.11814	0.0209691	0.143592	7.70035	0.00552102	0.0119432	up
Gstp1	1.11776	0.101649	0.170453	7.69879	0.00552579	0.0119432	up
Mrc1	0.071398	16.4383	108.216	7.64389	0.00569648	0.0122432	up
Grn	1.29303	0.449213	0.170815	7.48242	0.00623042	0.0133162	up
Tma7	0.464126	0.135193	0.22076	7.44785	0.00635121	0.0135493	up
Tpi1	0.563502	0.329751	0.223881	7.2495	0.00709207	0.0150185	up
Rpl18a	1.92245	0.212334	0.180496	7.18606	0.0073472	0.0154734	up
Arl6ip1	0.73038	0.138105	0.184773	7.17357	0.00739853	0.0155531	up
Rpl41	5.95916	0.257755	0.116798	7.12275	0.00761118	0.0159242	up
Cebpd	1.07653	0.680555	0.298943	7.12149	0.00761652	0.0159242	up
Rpl13a	0.347243	0.208512	0.265605	7.10971	0.00766676	0.0159713	up
Rps6	0.695952	0.162145	0.244371	7.0802	0.00779401	0.0161983	up
Adam12	0.55169	0.919341	0.500128	6.98261	0.00823057	0.0170226	up
Eef1d	0.542849	0.138707	0.223693	6.93894	0.00843391	0.0173808	up
Minos1	0.573616	0.247603	0.221653	6.74886	0.00938076	0.0191947	up
Cox5a	0.449349	0.303878	0.255972	6.73536	0.00945203	0.0193063	up
Pcolce	3.85321	0.339693	0.159607	6.69882	0.00964766	0.0196362	up
Park7	0.497982	0.323927	0.227739	6.69079	0.0096912	0.0196901	up
Hnrnpf	0.47681	0.0661525	0.21847	6.65905	0.00986537	0.0199035	up
Ncl	0.66893	0.0972531	0.23	6.65041	0.00991329	0.0199313	up
Lmo4	3.16983	0.244632	0.174838	6.62292	0.0100675	0.02017	up
Lrp10	0.761307	0.19596	0.203734	6.50826	0.0107375	0.0214377	up
Erp29	0.570556	0.254816	0.206189	6.49518	0.0108168	0.0215587	up
Cpz	2.21745	0.482194	0.216877	6.47589	0.0109348	0.0217562	up
H2-Aa	0.823256	1.28981	0.515074	6.3896	0.0114791	0.0227829	up
mt-Nd2	16.0789	0.0434872	0.137311	6.38786	0.0114903	0.0227829	up
Rnase4	0.479402	0.0135562	0.226616	6.38121	0.0115334	0.0228291	up
Slc25a3	1.09629	0.408253	0.17294	6.37285	0.011588	0.0228976	up
Tmed2	0.604017	0.0070236	0.192184	6.35757	0.0116882	0.0230246	up
Npm1	0.608518	0.0916652	0.227046	6.3413	0.0117958	0.0231496	up
G3bp2	0.559348	0.10527	0.231508	6.26626	0.0123059	0.0240686	up
Rpl22l1	0.936146	0.325797	0.192986	6.25882	0.0123577	0.0241063	up
Hspb1	0.475859	0.683185	0.389513	6.25141	0.0124094	0.0241073	up
Sqstm1	1.07778	0.187522	0.164465	6.23212	0.0125453	0.0243303	up
Cdkn1c	0.876465	0.411077	0.255809	6.19469	0.0128134	0.0247253	up
Iscu	0.434427	0.150547	0.237307	6.19002	0.0128473	0.0247492	up
Vdac2	0.381121	0.268801	0.253034	6.17663	0.0129449	0.0248956	up
1810058I24Rik	0.282944	0.166091	0.292423	6.08034	0.0136694	0.0262016	up
Eef2	1.56822	0.223987	0.159056	6.04523	0.0139439	0.0266834	up
Cd151	0.752858	0.00975371	0.185099	6.02722	0.0140869	0.0268677	up
Tmem176a	0.565333	0.022992	0.266199	6.02376	0.0141145	0.0268759	up
Cox7b	0.434143	0.393604	0.265976	5.9795	0.0144731	0.0274228	up
Fam180a	0.313502	0.997442	0.487576	5.90687	0.0150819	0.0283895	up
Col1a2	15.4723	0.387917	0.157003	5.90211	0.0151228	0.0284199	up
Egr1	0.677839	1.31448	0.548556	5.89085	0.0152197	0.0285092	up
Cystm1	0.394719	0.0424903	0.300915	5.88592	0.0152625	0.0285428	up
Cited2	0.305441	0.0478809	0.310526	5.85322	0.0155486	0.0290307	up
Phlda3	0.217148	0.183245	0.378246	5.79808	0.0160437	0.0298101	up
Rpl10a	1.6405	0.17931	0.169603	5.74662	0.0165204	0.0306466	up
Rpl35a	2.56846	0.0735357	0.151628	5.73273	0.0166515	0.0308402	up
Ywhaz	0.945937	0.246556	0.173174	5.72373	0.0167371	0.0309488	up
Lamp1	0.95272	0.261474	0.173057	5.70329	0.0169331	0.0312111	up
Prdx5	0.433172	0.213954	0.248107	5.68563	0.0171044	0.0314262	up
Apoe	4.87975	0.445345	0.195802	5.66065	0.0173497	0.0317252	up
C1qtnf2	0.265199	0.326025	0.354303	5.66137	0.0173426	0.0317252	up
Hexa	0.778917	0.388229	0.219699	5.62381	0.0177181	0.0323474	up
Cfh	1.44985	0.40424	0.31398	5.61337	0.0178239	0.0324378	up
Atp5e	1.07627	0.126627	0.183679	5.61454	0.0178121	0.0324378	up
Cdh11	3.82531	0.113647	0.17279	5.58359	0.0181295	0.0328901	up
Junb	0.300337	1.17041	0.524703	5.54705	0.0185118	0.0335308	up
Ctsk	0.643516	0.581587	0.267622	5.53282	0.018663	0.0337517	up
Sparc	12.8014	0.358738	0.159848	5.51727	0.0188297	0.0339464	up
Crtap	0.869055	0.411088	0.199034	5.50325	0.0189811	0.034166	up
Emc7	0.610447	0.0571054	0.195358	5.48903	0.0191361	0.0343377	up
Dusp1	0.555011	0.952937	0.413133	5.44809	0.0195897	0.0350425	up
Ikbip	0.408468	0.27347	0.248526	5.44504	0.019624	0.0350494	up
Atp1b1	3.21521	0.450269	0.210605	5.38456	0.0203157	0.0362286	up
Msx1	0.720458	0.425016	0.250066	5.34705	0.0207574	0.036902	up
Dbi	0.445548	0.208612	0.258327	5.33002	0.0209612	0.0372069	up
Itm2c	1.79312	0.101267	0.162999	5.32406	0.0210329	0.0372769	up
Swi5	0.876692	0.126656	0.182403	5.25076	0.0219371	0.0387007	up
Adamts9	1.21983	0.100275	0.358309	5.2454	0.0220049	0.0387609	up
Atp5o.1	0.467636	0.141009	0.229611	5.23812	0.0220972	0.0388641	up
Rpl6	2.16821	0.187034	0.154557	5.15577	0.0231692	0.0405637	up
H2-Eb1	0.634249	1.17414	0.544814	5.13531	0.0234439	0.0409478	up
Csf1r	0.0452424	15.9942	108.311	5.13414	0.0234597	0.0409478	up
Slc9b2	0.355602	0.738543	0.429214	5.12992	0.0235168	0.0409854	up
Adamts2	1.63417	0.160475	0.194417	5.10809	0.0238146	0.0414417	up
Fndc3a	0.507787	0.0925365	0.273771	5.10032	0.0239215	0.0415649	up
Ywhae	0.723363	0.306945	0.188797	5.09257	0.0240285	0.0416881	up
Rbbp7	0.498086	0.126597	0.225063	5.07696	0.0242458	0.0420018	up
Atp5j2	0.939842	0.119691	0.163616	5.04058	0.0247602	0.0426364	up
Lamtor2	0.350288	0.507082	0.288206	5.03428	0.0248504	0.0427278	up
Ociad1	0.483386	0.345669	0.232836	5.01442	0.025137	0.0431562	up
Olfml3	1.90621	0.378822	0.216495	5.00442	0.0252827	0.0432599	up
Smpd1	0.499621	0.0906028	0.229805	5.00255	0.02531	0.0432599	up
G0s2	1.18501	0.0658317	0.260234	4.98778	0.025527	0.0435661	up
Ndufa11	0.473138	0.0232059	0.225573	4.9633	0.0258907	0.0439912	up
Rack1	0.774359	0.0967243	0.201412	4.91934	0.0265577	0.045058	up
Tomm20	0.432293	0.177557	0.236969	4.86785	0.0273616	0.0462858	up
Actb	6.1181	0.0547265	0.114068	4.83935	0.0278174	0.0469189	up
Shisa5	0.415817	0.300816	0.253137	4.78181	0.0287618	0.0483703	up
Wfdc2	0.189023	0.776775	0.584928	4.76138	0.0291051	0.0488051	up
Crispld1	1.63128	-0.0500903	0.248782	0.795743	0.372369	0.412867	X
Ptpn18	0.0815755	-0.0943968	0.874108	0.133026	0.715315	0.730535	X
Col3a1	4.26756	0.0931558	0.207812	0.78183	0.376582	0.416336	X
Tmeff2	0.870661	-0.0701216	0.263425	0.14373	0.704601	0.72087	X
Cavin2	0.202487	-0.472028	0.442581	1.22578	0.268229	0.316674	X
Hspe1	0.433818	0.03209	0.240594	0.942076	0.331745	0.376151	X
Aox3	0.33613	0.451821	0.670666	1.72594	0.18893	0.237606	X
Bzw1	2.31183	0.0171831	0.181556	4.54408	0.0330327	0.0543988	X
Fzd7	0.660397	0.128496	0.276885	3.17214	0.0749043	0.108132	X
Fn1	1.71438	-0.241555	0.265498	0.886534	0.346418	0.388204	X
Rpl37a	2.3415	-0.053626	0.152683	3.24814	0.0715047	0.103876	X
Igfbp2	0.706345	0.272859	0.401811	0.646092	0.421513	0.459398	X
Igfbp5	26.6614	-0.0252275	0.183946	0.0277904	0.867603	0.870626	X
Arpc2	0.663375	-0.195993	0.197515	4.16061	0.0413745	0.065652	X
Chpf	0.579374	0.141298	0.244972	3.25935	0.0710175	0.103298	X
Kcne4	0.39135	-0.0210123	0.347174	1.13751	0.286178	0.332671	X
Serpine2	0.358188	0.67167	0.554342	2.86425	0.090568	0.127168	X
Nppc	0.158896	-0.0200852	0.673261	0.325453	0.568349	0.599028	X
Col6a3	0.695924	0.020549	0.446769	3.90169	0.0482375	0.0743904	X
Ramp1	0.154954	0.269612	0.614864	1.00921			X
Pam	1.34199	0.0879331	0.216189	0.255009	0.61357	0.638146	X
Prelp	0.812129	0.136861	0.231832	4.11325	0.0425486	0.0672373	X
Fmod	2.2239	0.33935	0.2791	2.59901	0.106931	0.146823	X
Btg2	0.326985	-0.0708931	0.412481	2.82225	0.0929658	0.130129	X
Prg4	0.147043	-0.018454	1.1386	0.00423915	0.948087	0.948087	X
Glul	1.83158	-0.0524176	0.172273	0.810315	0.368027	0.408446	X
Myoc	1.1294	1.6185	0.773595	3.6197			X
Mpc2	0.492781	-0.041698	0.208841	1.90057	0.168014	0.216018	X
Creg1	0.482677	-0.0753734	0.238219	0.434145	0.509962	0.545981	X
Ildr2	0.599436	0.237493	0.352525	2.95111	0.0858186	0.121304	X
Atp1a2	0.789629	0.598427	1.10435	0.262839			X
Tagln2	0.440347	0.0980753	0.269906	3.0816	0.0791828	0.113034	X
Marc2	0.511498	0.22457	0.226569	2.52983	0.111712	0.152152	X
Itih5	1.12269	0.136858	0.257353	2.22649	0.135662	0.179842	X
Vim	1.3326	-0.581729	0.301877	3.96287	0.0465145	0.072314	X
Npdc1	0.804608	0.358277	0.191987	3.77349	0.0520708	0.0788247	X
Ptgds	12.7971	-0.139047	0.862373	0.0266577			X
Edf1	0.473694	-0.0161299	0.219945	3.90226	0.0482211	0.0743904	X
Surf4	0.522255	-0.19619	0.211219	1.61035	0.204442	0.253517	X
Slc25a25	0.640721	0.283029	0.335622	3.38263	0.0658869	0.0971852	X
Rpl12	0.766564	0.410317	0.227611	3.53861	0.0599558	0.0897001	X
Hspa5	2.36942	-0.185098	0.147523	1.74732	0.186214	0.23496	X
Gsn	4.76626	-0.42806	0.244099	3.30518			X
Nr4a2	0.534443	-0.321667	0.557852	0.951359	0.329374	0.374569	X
Slc4a10	4.87925	-0.260208	0.194208	4.10627	0.0427246	0.0673307	X
Ssb	0.478928	-0.17314	0.220995	1.48526	0.222953	0.273819	X
Cybrd1	0.249443	0.475723	0.43481	1.2973	0.254708	0.304697	X
Nfe2l2	0.584636	-0.000719481	0.234026	2.16753	0.140952	0.186212	X
Serping1	2.34574	0.0352873	0.211027	1.12106	0.28969	0.336414	X
Mdk	1.73743	0.0333598	0.180456	3.25966	0.0710039	0.103298	X
Creb3l1	0.353956	0.257961	0.317719	0.861358	0.353359	0.394065	X
Cat	0.55086	-0.0445013	0.244556	0.673974	0.411669	0.44952	X
Thbs1	2.52032	0.055675	0.26562	0.131639	0.716739	0.73134	X
Pdia3	2.51893	0.0817871	0.124321	3.84757	0.0498182	0.076216	X
Fbln7	0.317749	0.380596	0.385933	1.56651	0.210715	0.260454	X
Cpxm1	1.87514	-0.00643381	0.217166	0.0973343	0.755052	0.766361	X
Ddrgk1	0.484596	-0.223959	0.226088	2.25399	0.13327	0.177079	X
Slc23a2	4.41773	0.21259	0.203011	4.06403	0.0438058	0.0686589	X
Dstn	0.468194	-0.0136506	0.252719	0.00656185	0.935438	0.93625	X
Thbd	1.23739	-0.135216	0.239645	0.737449	0.390479	0.429639	X
Cst3	11.9364	0.257517	0.1613	3.19079	0.0740541	0.107174	X
Pygb	0.894026	-0.165427	0.207915	4.1023	0.042825	0.0673967	X
Id1	1.36172	0.188119	0.229984	1.22545	0.268293	0.316674	X
Scand1	0.609855	-0.00657962	0.196513	0.573401	0.448911	0.485127	X
Myl9	0.31157	-0.142373	0.352252	0.915348	0.3387	0.381783	X
Nnat	0.231369	1.03498	1.86698	0.273858			X
Lbp	1.14026	0.398384	0.218942	3.37303	0.0662716	0.0976277	X
Snhg11	5.01239	0.0948909	0.31299	0.940226	0.33222	0.37632	X
Serinc3	0.559351	-0.19299	0.218331	3.14888	0.0759791	0.109273	X
Wisp2	0.2776	-0.134288	0.518396	0.135574	0.712721	0.728531	X
Ywhab	0.543103	-0.012229	0.228105	2.38165	0.122768	0.165027	X
Matn4	1.16285	-0.612795	0.497027	1.9195	0.165912	0.213792	X
Ctsa	0.616366	-0.0575755	0.189652	0.256505	0.612531	0.638007	X
Pltp	0.347387	0.580575	0.420021	2.10895	0.14644	0.191485	X
Sulf2	1.00323	0.00427542	0.228144	1.76376	0.184156	0.232619	X
Ptgis	0.858846	0.153619	0.234235	2.95452	0.0856379	0.121198	X
Gnas	5.56558	-0.0256144	0.140757	0.371107	0.542402	0.574836	X
Ctsz	0.763205	-0.118186	0.181994	3.28699	0.069831	0.101959	X
Psma7	0.561072	0.120452	0.204118	2.57737	0.108402	0.148665	X
Tspan7	0.227516	0.73068	0.600991	1.69139	0.193418	0.242436	X
Timp1	0.342243	-0.780912	0.318413	14.3217			X
Gpc3	0.904606	-0.137887	0.237476	0.374305	0.540667	0.573525	X
Bgn	4.24486	0.248136	0.160247	3.85433	0.0496179	0.0760103	X
Ssr4	0.794482	0.245894	0.190333	2.46127	0.116684	0.158142	X
Atp6ap1	0.885069	-0.0597647	0.168303	0.625157	0.429137	0.466824	X
Maged1	0.957447	0.24859	0.182942	2.07896	0.149342	0.195058	X
Efnb1	0.509141	-0.0450869	0.247235	0.218826	0.639936	0.660579	X
Tnmd	0.234645	0.431729	0.573331	1.33432	0.248039	0.297646	X
Tceal9	0.409467	0.0178945	0.252576	1.2032	0.272684	0.32087	X
Tsc22d3	1.30075	-0.205714	0.195777	1.43911	0.230283	0.281919	X
Chrdl1	0.558258	0.317708	0.437479	2.32247	0.127517	0.170814	X
Tmsb4x	3.22153	0.127828	0.165225	2.99334	0.0836075	0.119055	X
Prps2	0.495474	0.00452238	0.279812	0.149073	0.699423	0.717328	X
Car2	0.159433	-2.00413	1.10293	4.11571			X
Cp	1.6719	-0.0275863	0.301434	1.23742	0.265969	0.316199	X
Cldn11	1.34779	0.186331	0.267175	1.68992	0.193612	0.242436	X
Slc7a11	0.413767	0.105103	1.18334	0.148584	0.699893	0.717328	X
Lhfp	0.596369	-0.0759829	0.242643	0.916227	0.338467	0.381783	X
Pfn2	0.894256	0.171197	0.214026	4.40443	0.0358458	0.0583253	X
Selenot	0.491261	-0.187797	0.223803	0.947767	0.330288	0.375239	X
Sfrp2	0.4056	-1.00788	0.614706	3.34193			X
Crabp2	0.192542	0.0568788	0.436912	1.78872	0.181082	0.229996	X
Lmna	0.50499	-0.184946	0.237695	3.95742	0.0466652	0.0724505	X
Ssr2	0.403126	-0.0557637	0.238149	4.27746	0.0386211	0.0621389	X
Slc50a1	0.857768	0.210982	0.207868	3.80364	0.0511412	0.0776215	X
S100a6	1.12806	0.245347	0.324856	0.729736			X
Ctss	0.112726	2.19286	1.17046	3.17333	0.0748497	0.108132	X
Ecm1	0.534103	-0.387231	0.275988	2.00932	0.156335	0.203731	X
Txnip	0.880468	-0.027651	0.224959	0.333949	0.563343	0.594296	X
Atp1a1	0.829796	0.0256958	0.196065	0.386234	0.534285	0.568326	X
Slc16a1	0.511696	0.12868	0.288385	0.217274	0.641125	0.661214	X
Atp5f1	0.646684	-0.114848	0.203515	1.93461	0.164255	0.212132	X
Palmd	0.683927	-0.0497901	0.27693	4.31694	0.0377348	0.0611057	X
Cnn3	0.727474	-0.0714182	0.18798	3.41754	0.064507	0.0956105	X
F3	1.30478	0.331665	0.31492	1.77135	0.183215	0.231839	X
1810037I17Rik	0.616387	-0.0655466	0.218386	0.883202	0.347326	0.388843	X
Emcn	0.0836189	-0.11417	1.10573	0.396039	0.529142	0.563896	X
Ddit4l	0.218953	0.264643	0.419109	1.57064	0.210115	0.259992	X
H2afz	0.457983	0.0259216	0.260501	1.68491	0.194273	0.242908	X
Cyr61	1.5775	0.250686	0.470253	0.273025	0.60131	0.627454	X
Rps20	2.52307	0.2083	0.17528	3.68877	0.0547801	0.0823846	X
Penk	1.88532	0.196485	0.410162	0.425734	0.51409	0.549168	X
Sdcbp	0.498055	-0.18734	0.211018	1.16591	0.280243	0.326923	X
Slc26a7	1.10778	0.0576483	0.213473	1.90823	0.16716	0.21516	X
Pnrc1	0.59104	-0.138362	0.222424	4.04463	0.0443122	0.0693582	X
Cntfr	0.683919	0.177489	0.239227	0.721576	0.395627	0.433647	X
Il11ra1	1.03768	-0.0750789	0.199405	1.0424	0.307263	0.352206	X
Vcp	0.904347	0.0491891	0.166784	1.85028	0.173751	0.222155	X
Clta	0.660633	0.215509	0.208915	1.46011	0.226913	0.278089	X
Anp32b	0.326111	-0.0492841	0.273023	1.08532	0.29751	0.343763	X
Tnc	0.227674	4.8338	2.47923	3.31866	0.0684977	0.100522	X
Pappa	0.461661	-0.304113	0.462663	1.40809	0.235373	0.286325	X
Adamtsl1	1.45603	-0.0417674	0.269077	2.54278	0.1108	0.151593	X
Hacd4	0.263466	-0.144165	0.336441	3.78724	0.0516447	0.0782825	X
Jun	0.675281	0.763843	0.506535	4.16892	0.0411721	0.0655114	X
Plpp3	7.62412	0.0941973	0.139222	1.77036	0.183338	0.231839	X
Ybx1	0.676593	-0.315789	0.202247	2.4493	0.117577	0.159165	X
Col8a2	1.16272	0.277283	0.225382	1.92221	0.165613	0.213647	X
Laptm5	0.126792	0.0752121	0.822	0.0377188	0.846009	0.851925	X
Atpif1	0.682032	0.0763151	0.228113	0.109966	0.740183	0.752595	X
Cd52	0.165049	1.1869	0.921912	1.38383	0.239449	0.28945	X
Tmem50a	0.928223	0.0128429	0.16616	0.284747	0.593607	0.619977	X
Clic4	2.17302	0.224249	0.255614	0.87757	0.348868	0.389812	X
Fuca1	0.536913	0.274573	0.227062	2.19141	0.138782	0.183767	X
Id3	3.43643	0.122144	0.147448	4.00146	0.0454609	0.0710596	X
C1qb	0.2433	1.18196	1.00932	1.06969	0.301016	0.346771	X
C1qc	0.240433	1.78947	1.09882	2.26556	0.132278	0.175964	X
C1qa	0.238567	1.03348	1.00455	1.08851	0.296801	0.343288	X
Cdc42	1.05433	-0.248934	0.146562	2.98122	0.0842359	0.119654	X
Alpl	1.98417	0.124567	0.210593	0.380642	0.53726	0.570436	X
Nbl1	1.42096	-0.0243451	0.200408	1.30032	0.254155	0.304526	X
Mfap2	1.20675	0.243675	0.23718	4.53045	0.0332968	0.0547189	X
Dhrs3	0.574049	0.568707	0.279305	4.62419	0.0315241	0.052103	X
Eno1	0.441592	-0.169272	0.238496	2.04858	0.152348	0.19876	X
Mxra8	1.70573	0.0793361	0.168874	3.2908	0.0696692	0.101851	X
Isg15	0.308196	-1.89258	0.431094	20.9467			X
Fgl2	2.11637	-0.0323477	0.197257	2.36301	0.124242	0.166815	X
Rheb	0.445028	0.0636492	0.228558	2.46578	0.11635	0.157874	X
Emilin1	1.50934	0.0825656	0.178543	4.09698	0.0429599	0.0675169	X
Slc5a6	0.825957	0.2201	0.255905	1.17665	0.278039	0.325509	X
Atraid	0.596607	0.127531	0.208963	1.06779	0.301444	0.346917	X
Ywhah	0.521236	0.0190904	0.230628	0.0848164	0.770873	0.780357	X
Htra3	1.42711	0.1931	0.20832	0.900134	0.342746	0.384837	X
Hs3st1	0.300132	0.328043	0.456391	0.581231	0.44583	0.48225	X
Shisa3	1.84963	0.207136	0.199311	1.87288	0.171146	0.2198	X
Igfbp7	5.22827	0.249778	0.172407	2.96163	0.0852621	0.120932	X
Pf4	0.0910816	2.8486	1.73339	2.42339	0.119536	0.161626	X
Anxa3	0.51589	0.259404	0.300993	1.19006	0.275318	0.32309	X
Plac8	0.0586063	1.0352	1.80716	0.470353			X
Spp1	0.965293	-0.489959	0.933746	0.30933			X
Rpl5	0.692943	-0.0640824	0.223744	3.73404	0.0533142	0.0806011	X
Fam69a	0.312162	0.121411	0.309641	1.03403	0.309215	0.353739	X
Dynll1	1.1308	-0.193953	0.174734	1.24464	0.264579	0.314871	X
Arpc3	0.47217	-0.242782	0.219178	4.25182	0.0392083	0.0629081	X
Eln	0.560391	-0.102887	0.467212	3.06349	0.0800693	0.114158	X
Por	0.80408	0.00425718	0.233254	1.10739	0.292651	0.339168	X
Gnb2	0.928523	0.188634	0.170353	1.47062	0.225248	0.276343	X
Arpc1a	0.440851	0.0539468	0.250027	0.115009	0.734512	0.747489	X
Arpc1b	0.822052	0.041767	0.183553	1.39435	0.237671	0.288207	X
Flt1	0.0743939	-1.71792	1.2303	2.48772	0.114738	0.156055	X
Alox5ap	0.0708164	1.37255	1.25488	1.29952	0.254301	0.304526	X
Gng11	0.514429	0.137132	0.351935	0.880163	0.348157	0.389395	X
Arf5	0.828899	-0.173498	0.16476	1.62237	0.202761	0.251975	X
Mest	0.150878	-0.605917	0.520021	1.41535	0.234169	0.285464	X
Ptn	1.35106	0.175585	0.267092	0.929995	0.334864	0.378571	X
Ndufb2	0.417779	0.0777429	0.232811	3.3589	0.0668427	0.0983433	X
Pdia4	0.517484	-0.0726353	0.216313	0.286367	0.592558	0.619443	X
Rarres2	0.460129	-0.00908351	0.298424	0.0559589	0.813001	0.820839	X
Abcg2	0.914137	-0.162999	0.23111	1.4042	0.236022	0.28651	X
St3gal5	0.457947	-0.0970026	0.253688	0.251915	0.61573	0.639604	X
Vamp8	0.495962	0.143759	0.236256	2.63811	0.104328	0.143935	X
Tmsb10	2.69803	0.266796	0.185977	3.43276	0.0639152	0.0951296	X
Snrpg	0.315536	0.043458	0.277416	1.03795	0.308298	0.353041	X
Rpn1	0.749857	-0.0475176	0.184112	0.0717397	0.78882	0.797124	X
Slc6a6	2.95743	0.0883145	0.200805	2.6638	0.102655	0.142138	X
Cxcl12	1.57781	-0.0540624	0.266243	4.11019	0.0426256	0.0672666	X
M6pr	0.632498	0.220015	0.226788	1.02785	0.310664	0.355044	X
Mfap5	0.975304	0.075878	0.279316	1.22616	0.268155	0.316674	X
Mlf2	0.522998	-0.000579425	0.208099	0.0512161	0.820961	0.828149	X
Tnfrsf1a	0.629586	0.216512	0.203827	1.70494	0.191643	0.240755	X
Mgp	21.015	0.0938165	0.155889	1.0609	0.30301	0.34837	X
Arhgdib	0.343696	0.438405	0.335523	3.57955	0.058495	0.0877425	X
Mgst1	0.298291	-0.135677	0.306435	3.97599	0.0461532	0.0720441	X
Ldhb	0.320545	0.336919	0.353436	1.05583	0.304168	0.349353	X
Tmtc1	0.711183	0.142559	0.254412	3.84291	0.0499567	0.0763265	X
Selenow	0.957867	-0.0681515	0.172865	0.788612	0.37452	0.414455	X
Bcam	0.122543	0.240397	0.920574	0.103091	0.748151	0.760026	X
Rps19	1.39172	-0.165586	0.193479	3.27304	0.0704271	0.102699	X
Cyp2f2	0.269174	-0.0711446	0.553706	0.447926	0.503321	0.539405	X
Ltbp4	0.730199	-0.138399	0.31354	3.88982	0.0485797	0.0748179	X
Pld3	0.523922	0.0043114	0.216314	1.73162	0.188205	0.236953	X
Ech1	0.502682	0.0622575	0.226882	0.288343	0.591284	0.618674	X
Eif3k	0.525255	0.0490949	0.219963	0.907016	0.340908	0.383521	X
Spint2	0.13041	0.827952	0.782863	1.8567	0.173006	0.221694	X
Capns1	0.567307	-0.0756813	0.197221	0.171269	0.678986	0.697141	X
Tyrobp	0.206277	0.275481	0.858582	0.360045	0.548481	0.580745	X
Fxyd1	0.602889	0.36623	0.241271	3.16318	0.0753162	0.108455	X
Fxyd3	0.0794971	1.01394	2.10022	0.247608			X
Gpi1	0.666606	0.140164	0.207377	2.89182	0.0890305	0.125383	X
Clec11a	2.09712	0.200866	0.210486	3.72323	0.0536606	0.0810184	X
Rcn3	1.43928	0.243186	0.184578	3.10491	0.0780566	0.111842	X
Tmem86a	0.508212	0.0993063	0.24804	4.63561	0.0313151	0.0519064	X
Selenos	0.616484	-0.235124	0.201703	1.68387	0.194411	0.242908	X
Adamtsl3	0.532144	0.058759	0.43554	1.16524	0.280382	0.326923	X
Cemip	1.02267	0.10998	0.442725	0.323331	0.569613	0.5993	X
Ctsc	0.0652058	0.45276	0.93989	0.300182	0.583769	0.613037	X
Prss23	1.0129	-0.255506	0.41063	0.560069	0.454233	0.489959	X
Spcs2	0.692453	-0.383724	0.173733	4.66911	0.0307098	0.0510501	X
Ucp2	0.320018	-0.275456	0.335227	2.64614	0.103802	0.143553	X
Cavin3	0.785363	-0.028279	0.199172	4.26064	0.0390053	0.0626695	X
Adm	0.0966586	0.12292	0.712789	0.425171	0.514368	0.549168	X
Eif3c	0.476374	0.0753624	0.235271	0.397683	0.528288	0.563507	X
Nupr1	0.495951	-1.16216	0.301355	16.0611			X
Coro1a	0.06942	1.56888	1.23736	2.53232	0.111536	0.152152	X
Htra1	1.8334	0.377503	0.203074	4.1412	0.0418515	0.0663177	X
Cpxm2	1.47555	0.076271	0.25138	0.0926174	0.760876	0.770914	X
Taldo1	0.385186	0.0577047	0.261405	1.99944	0.157357	0.204831	X
Ifitm10	1.86466	0.0922544	0.289834	3.30247	0.0691757	0.101258	X
H19	2.27139	0.0218619	0.270355	0.24457	0.620925	0.643839	X
Plagl1	0.923291	0.0659684	0.349332	3.30402	0.0691108	0.101258	X
Perp	0.46538	-0.114806	0.287884	2.6442	0.103929	0.143556	X
Ifngr1	0.373486	0.46474	0.314442	2.29817	0.129527	0.172903	X
Moxd1	0.187207	0.9851	1.30117	0.525193	0.468635	0.505021	X
Ctgf	0.763005	0.211168	0.398399	1.35873	0.243758	0.29312	X
Rspo3	1.99725	0.122141	0.191225	0.429495	0.512237	0.547908	X
Fam26e	0.650254	-0.36005	0.226573	2.54087	0.110934	0.151596	X
Snx3	0.571512	-0.217206	0.192538	1.42589	0.232436	0.284253	X
Serinc1	0.753417	-0.230692	0.193821	2.30898	0.128629	0.171903	X
Psap	3.73831	0.170858	0.110353	2.40742	0.120762	0.162901	X
Srgn	0.301283	0.511234	0.448044	1.37246	0.24139	0.291185	X
Slc16a9	0.585631	-0.0812575	0.305436	0.383877	0.535536	0.56913	X
Chchd10	0.123397	-0.301597	0.718414	0.931404	0.334498	0.378529	X
Col6a2	3.59074	0.122378	0.151168	0.735409	0.391136	0.429951	X
Col6a1	2.92582	0.151055	0.156107	1.01098	0.314669	0.359265	X
Cnn2	0.557356	0.442662	0.28143	2.57395	0.108636	0.14881	X
Rps15	0.859957	0.0470927	0.191744	0.58475	0.444456	0.481216	X
Oaz1	1.71425	0.125645	0.141723	1.40977	0.235095	0.286289	X
Timm13	0.364795	-0.0201834	0.252253	3.43062	0.063998	0.09513	X
Gadd45b	0.363109	-0.287156	0.352902	0.908689	0.340462	0.383395	X
Nfic	0.879984	0.149005	0.191661	1.0013	0.316997	0.361207	X
Aes	0.474776	-0.000376028	0.239673	1.54758	0.213493	0.263323	X
Timp3	1.39312	0.212047	0.224554	3.13397	0.0766767	0.110139	X
Hsp90b1	3.01154	0.0960432	0.130542	1.37068	0.241695	0.291248	X
Igf1	1.25676	-0.182959	0.252069	3.41634	0.0645541	0.0956105	X
Dcn	9.43616	-0.253202	0.233682	1.26663	0.260401	0.310671	X
Lum	1.65932	0.14577	0.477382	0.129185	0.719279	0.733282	X
Epyc	0.183167	0.678211	0.907883	0.590175	0.442351	0.479387	X
Csrp2	1.58701	0.148247	0.202935	1.16665	0.280091	0.326923	X
Phlda1	0.270402	0.2117	0.441483	0.344046	0.557503	0.589755	X
Ptprb	0.0375561	-2.38747	1.81479	2.46776	0.116203	0.157861	X
Lyz2	0.469823	1.15189	0.628903	3.62142	0.0570401	0.0856716	X
Tmbim4	0.456034	-0.00547448	0.225082	3.40255	0.0650958	0.0962649	X
Ptges3	0.489921	-0.023346	0.224243	0.834991	0.360833	0.401623	X
Gas6	3.12562	0.37796	0.20177	3.48541	0.061912	0.0923867	X
Angpt2	0.43307	-0.141142	0.3195	0.222658	0.637022	0.658161	X
Plat	0.416114	-0.302458	0.350144	3.2419	0.0717772	0.10414	X
Tcim	0.368137	0.399093	0.426422	1.18889	0.275554	0.32309	X
Pdgfrl	0.935232	-0.00774572	0.209577	0.0240356	0.876794	0.879084	X
Slc25a4	1.08806	0.0893417	0.161021	2.62772	0.105012	0.144533	X
Hpgd	0.281002	0.172993	0.474898	0.790043	0.374087	0.414373	X
Cpe	1.01568	0.0923164	0.223627	0.184366	0.667648	0.686723	X
Cilp2	0.520328	0.416661	0.465227	2.52949	0.111736	0.152152	X
Cope	0.661869	0.358086	0.211464	4.07128	0.0436183	0.0684581	X
Comp	1.39435	0.396256	0.524587	0.570096	0.450221	0.486087	X
Jund	0.450632	0.0859669	0.28984	1.79837	0.17991	0.229012	X
Plvap	0.0354171	-2.31934	1.50829	3.56067	0.0591639	0.0886304	X
Klf2	1.00528	0.499546	0.260439	4.29603	0.0382014	0.0615497	X
Hhip	0.392227	0.386527	0.458918	1.85407	0.173311	0.221838	X
Ier2	0.211513	0.137823	0.476767	0.318847	0.572302	0.601543	X
Calr	1.17804	-0.24506	0.158644	2.81834	0.0931927	0.130289	X
Prdx2	0.664247	-0.526726	0.211744	7.28029			X
Mmp2	0.913928	0.0723472	0.261923	0.226098	0.634432	0.656663	X
Mt1	1.17035	-0.776664	0.223915	18.1633			X
Psmd7	0.468224	-0.371506	0.203525	3.21239	0.0730825	0.105901	X
Crispld2	0.397496	-0.134982	0.44472	0.391566	0.531477	0.565861	X
Foxc2	1.0001	0.274027	0.222628	4.63734	0.0312834	0.0519064	X
Map1lc3b	0.556632	0.304526	0.220875	2.23862	0.134601	0.178642	X
Itgb1	1.07363	-0.0503172	0.17397	4.47975	0.0342987	0.0560455	X
Kcnk5	0.577491	0.318054	0.302585	2.80358	0.0940539	0.131174	X
Rps24	3.47997	0.201404	0.159385	1.79342	0.18051	0.229522	X
Gdf10	2.37041	0.267432	0.215271	2.15406	0.142194	0.187637	X
Ptgdr	0.534534	-0.190902	0.28902	2.31955	0.127757	0.170936	X
Psme1	0.582895	0.0938908	0.210946	0.291112	0.589509	0.617939	X
Psme2	0.476502	-0.0584323	0.211284	3.96364	0.0464932	0.072314	X
Gjb2	0.514519	0.434855	0.374397	4.52264	0.0334492	0.054891	X
Gjb6	1.1049	0.421408	0.290407	2.14696	0.142852	0.18786	X
Ctsb	1.69408	0.157	0.154198	2.90185	0.0884778	0.124757	X
Scara5	0.306253	-0.422403	0.577256	2.77029	0.096029	0.133606	X
Clu	1.54068	0.695092	0.400686	3.32513			X
Bnip3l	0.426273	-0.265999	0.265873	2.34792	0.12545	0.168241	X
Pdlim2	0.54921	0.0581724	0.24048	3.70422	0.0542751	0.0818389	X
Lcp1	0.125209	1.32287	0.965947	3.41592	0.0645703	0.0956105	X
Tsc22d1	2.23824	0.061303	0.155736	2.94094	0.0863603	0.12192	X
Kctd12	1.56389	-0.259032	0.226957	1.42069	0.23329	0.284693	X
Dnajc3	1.60432	-0.105038	0.143963	0.832995	0.361408	0.401874	X
Tm9sf2	0.85052	0.000427828	0.191266	1.95596	0.161946	0.209812	X
Itgbl1	0.618612	0.145924	0.316701	2.96005	0.0853452	0.120932	X
Sept7	0.878197	-0.214586	0.16922	4.50483	0.0337993	0.0553866	X
Aplp2	1.87742	0.10169	0.159416	1.23244	0.266934	0.316309	X
Srpr	0.94983	0.0701885	0.169791	0.179865	0.671489	0.690058	X
Tbrg1	0.48323	-0.221751	0.22344	4.1623	0.0413332	0.065652	X
Atp5l	0.981248	0.145851	0.181435	1.80006	0.179705	0.229012	X
Mpzl2	0.424507	-0.373912	0.288948	1.77247	0.183077	0.231839	X
Tagln	0.179642	-0.279375	0.703774	0.198294	0.656101	0.67545	X
Rdx	0.680398	0.0616891	0.219254	0.0953942	0.757428	0.768096	X
Psma4	0.358422	0.0622515	0.253965	1.21531	0.270283	0.318696	X
Rcn2	0.925965	0.202433	0.176301	1.78365	0.181701	0.230529	X
Tspan3	0.934072	0.0277505	0.163752	3.86491	0.0493058	0.0757338	X
Nptn	1.01182	0.0180243	0.186578	3.44253	0.0635382	0.0946908	X
Pkm	0.99068	0.043407	0.168188	1.74384	0.186653	0.235256	X
Thsd4	0.322462	0.297963	0.399687	1.37499	0.240956	0.290966	X
Aldh1a2	0.156833	-0.234512	0.778611	0.124465			X
Elovl5	0.538712	-0.244795	0.209925	2.38485	0.122516	0.164882	X
Gsta4	0.45645	0.391334	0.366663	2.11452	0.145908	0.191006	X
Col12a1	7.21976	0.264205	0.180245	2.61836	0.105633	0.145214	X
Col6a5	0.212146	0.135538	0.906476	0.023243	0.878827	0.880355	X
Gnai2	0.389217	0.450994	0.275341	3.82643	0.0504501	0.0768764	X
Dag1	0.481197	-0.0685169	0.243402	1.07463	0.299901	0.345832	X
Rhoa	1.61088	-0.128124	0.126892	3.39991	0.0652001	0.0962956	X
Gpx1	1.16706	-1.09329	0.203175	29.3026			X
Cmtm7	0.254738	0.680792	0.436161	2.75715	0.0968206	0.134544	X
Tgfbr2	0.709447	-0.175798	0.193066	1.11412	0.291187	0.337813	X
Cx3cr1	0.0152506	14.3826	108.664	1.34618	0.245947	0.295444	X
Rpsa	2.59164	0.233957	0.164019	4.60018	0.0319685	0.0527618	X
Clec3b	0.168154	0.652903	1.06555	0.298361	0.584912	0.613678	X
Xbp1	0.656047	0.0695821	0.225153	2.27513	0.131464	0.175083	X
Aebp1	2.9125	0.174343	0.177138	1.86071	0.172543	0.221347	X
Igfbp3	0.0611925	-1.76411	1.39524	2.31978			X
B3gnt2	0.416641	0.0653087	0.284084	1.0051	0.316079	0.360518	X
Cct4	0.299451	-0.0573326	0.277206	0.644883	0.421948	0.459437	X
Efemp1	2.00445	-0.231465	0.177731	4.71221	0.0299491	0.050002	X
Hba-a1	1.39064	-3.906	0.458122	102.649			X
4930469K13Rik	0.0442247	-1.08645	3.41567	0.132369			X
Pttg1	0.425866	0.0410955	0.24953	0.323273	0.569647	0.5993	X
Gpx3	5.00871	0.324751	0.36894	0.756131	0.384542	0.424729	X
Slc47a1	5.13168	0.325279	0.206323	2.88356	0.0894878	0.125873	X
Mfap4	5.04642	0.490648	0.241809	4.62927	0.0314309	0.0520236	X
Pmp22	0.790639	0.185498	0.206472	2.40913	0.120629	0.162901	X
Atp1b2	0.462662	-0.0351466	0.314978	0.122442	0.726401	0.739888	X
Tmem256	0.544959	-0.162832	0.200166	1.26604	0.26051	0.310671	X
Eif5a	0.604013	0.0339509	0.20232	3.32379	0.0682843	0.100336	X
Slc16a11	0.292953	0.325431	0.49157	0.875794	0.349356	0.389979	X
Rpl23a	0.562828	-0.0793382	0.230218	3.69083	0.0547123	0.0823846	X
Vtn	0.844162	0.498751	0.678815	0.519905	0.470882	0.506969	X
Wfdc17	0.0302027	15.5641	108.403	3.97011	0.0463148	0.0721985	X
Scpep1	0.385154	0.19303	0.268934	1.24714	0.264099	0.314625	X
Tmem100	0.196505	0.257139	0.463355	2.13587	0.143889	0.188793	X
Chad	0.390548	0.730273	1.31742	0.241845			X
Copz2	0.561909	0.158809	0.241876	4.22584	0.039813	0.0637894	X
Igfbp4	3.52888	0.165436	0.188933	0.976519	0.32306	0.367752	X
Cavin1	0.650977	-0.0532996	0.204381	0.270214	0.603188	0.628844	X
Kcnj2	0.45481	0.282922	0.395615	1.98086	0.1593	0.206892	X
Timp2	1.45075	-0.183778	0.174984	1.64577	0.199535	0.248234	X
Lgals3bp	0.518273	-0.16357	0.245313	1.14297	0.285025	0.331665	X
Gaa	1.16677	0.102525	0.177206	0.341597	0.558909	0.5907	X
Arhgdia	0.56826	0.194668	0.213615	1.23429	0.266574	0.316309	X
Nid1	1.48807	0.0193659	0.216116	3.9054	0.0481312	0.0743904	X
Epdr1	0.511689	0.334144	0.242331	4.48107	0.0342723	0.0560455	X
Sfrp4	3.36733	0.121877	0.260544	0.590762	0.442125	0.479387	X
Serpinb9	0.386323	0.138836	0.33146	1.07609	0.299573	0.3458	X
Aspn	0.283587	-0.86099	0.443907	4.13862	0.0419154	0.0663276	X
Gadd45g	0.63727	0.296282	0.339855	0.750675	0.386263	0.426221	X
B230219D22Rik	0.601323	-0.103801	0.21293	2.63514	0.104523	0.144031	X
Tgfbi	1.07664	0.0951542	0.238034	1.19403	0.274519	0.322699	X
Hnrnpk	1.01488	-0.0626692	0.165214	0.2066	0.649445	0.669196	X
Ntrk2	0.705878	-0.0256389	0.301935	1.65961	0.197656	0.246335	X
Gas1	2.98442	0.211063	0.183855	1.51081	0.219016	0.269558	X
Nr2f1	0.656606	0.149333	0.418942	4.54294	0.0330548	0.0543988	X
Cox7c	1.06428	0.180071	0.187636	4.69122	0.0303171	0.0505431	X
Nsa2	0.441484	-0.0729658	0.282082	1.10553	0.293057	0.339298	X
Hexb	0.495056	0.21248	0.243468	4.68395	0.0304457	0.0506842	X
Gpx8	0.579926	0.0646246	0.218175	1.1882	0.275692	0.32309	X
Emb	2.26441	0.205165	0.177371	4.3155	0.0377667	0.0611057	X
Rhob	0.821657	0.225413	0.229232	1.95702	0.161833	0.209812	X
Pdia6	1.02829	0.139794	0.17867	0.621256	0.430581	0.467952	X
Id2	1.73924	-0.0428556	0.177293	0.916468	0.338404	0.381783	X
Slc26a4	0.059103	-2.29597	2.04644	1.55992	0.211677	0.261363	X
Tspan13	1.25466	-0.0371793	0.20995	4.33795	0.0372717	0.06056	X
Coch	0.0909275	0.0586734	1.64144	0.0554434			X
Nfkbia	0.450869	-0.265741	0.247327	2.16827	0.140885	0.186212	X
Smoc1	2.098	0.114905	0.18354	0.610207	0.43471	0.471994	X
Npc2	0.810045	0.274716	0.188862	3.83787	0.0501072	0.076455	X
Pgf	0.22377	-0.0835055	0.390177	2.14049	0.143456	0.188439	X
Fos	0.312078	1.32333	0.665907	3.94254	0.0470795	0.0729955	X
Lgmn	0.269386	0.248395	0.374441	0.447863	0.503351	0.539405	X
Ifi27	1.09047	0.160983	0.178215	1.94309	0.163333	0.211178	X
Ifi27l2a	0.205769	-0.151874	0.557177	0.289518	0.590529	0.618445	X
Meg3	2.3669	0.163046	0.408569	1.4062	0.235689	0.286406	X
Hsp90aa1	0.815064	-0.3799	0.205705	4.19971	0.040431	0.0645104	X
Ckb	1.00973	0.164107	0.253746	1.1695	0.279503	0.326891	X
Crip2	0.113333	-0.958652	0.605358	4.42864	0.0353407	0.0576665	X
Crip1	0.463196	0.287173	0.38439	0.681017	0.409237	0.447287	X
Oxct1	0.488495	-0.0494716	0.225658	0.0482994	0.826049	0.832554	X
Npr3	0.561392	0.0138716	0.371008	1.42322	0.232874	0.284487	X
Sdc2	0.471072	-0.213313	0.224231	4.22347	0.0398686	0.0637898	X
Cpq	0.844803	0.185202	0.18291	1.20545	0.272235	0.32067	X
Matn2	0.417881	0.0511799	0.366337	1.66933	0.196348	0.245063	X
Cox6c	1.0442	-0.0257168	0.168767	3.82378	0.0505302	0.0768967	X
Pabpc1	1.23356	-0.687856	0.205327	14.5755			X
Eif3h	0.445163	0.107111	0.245656	4.17485	0.0410281	0.0653726	X
Nov	0.912744	-0.0492041	0.353232	0.0368273	0.847817	0.852772	X
Col14a1	1.50986	0.278644	0.263246	1.79991	0.179723	0.229012	X
Ly6e	1.6922	-0.057487	0.212285	3.88379	0.0487544	0.0749867	X
Ly6a	0.179234	-0.455464	0.677874	0.905146	0.341406	0.383707	X
Ly6c1	0.0353326	-0.93569	1.8484	0.491127	0.483425	0.519987	X
Cyc1	0.389573	-0.203968	0.243778	0.670651	0.412825	0.450354	X
Rac2	0.0688853	0.697198	1.17269	0.338954	0.560434	0.591769	X
Lgals1	0.474278	-0.260869	0.276362	5.44495			X
H1f0	0.32305	0.218478	0.337813	0.812906	0.367262	0.407991	X
Rbx1	0.643849	0.14808	0.195421	1.48617	0.222812	0.273819	X
Ndufa6	0.702802	0.0357446	0.197726	0.0334343	0.854915	0.858642	X
Fbln1	3.34804	0.149853	0.178002	0.730617	0.392683	0.43124	X
Slc38a1	1.20376	-0.215186	0.246054	4.21323	0.0401099	0.0640868	X
Slc38a2	22.9794	-0.184252	0.151466	2.70681	0.0999208	0.138518	X
Nr4a1	0.686257	0.768617	0.465854	2.86316	0.0906296	0.127168	X
Krt18	0.0269844	0.804629	2.38744	0.254718	0.613772	0.638146	X
Igfbp6	2.6719	0.171769	0.207269	2.85689	0.0909835	0.12751	X
Hnrnpa1	0.378218	0.326814	0.295051	1.23127	0.267161	0.316309	X
AU021092	0.0570125	16.1365	108.296	2.2897	0.130235	0.173647	X
Ap2m1	0.511549	0.082482	0.204797	2.81467	0.0934058	0.130429	X
Ppp1r2	0.820642	0.146307	0.232176	4.29672	0.0381859	0.0615497	X
Apod	4.89625	-0.480283	0.322493	2.40298			X
Itgb5	0.567665	0.00277701	0.2409	1.54489	0.213891	0.263532	X
Mylk	1.63555	-0.169668	0.32971	4.32636	0.0375265	0.060888	X
Fstl1	2.50007	0.0095763	0.161462	1.05252	0.304927	0.349876	X
Boc	1.20019	0.282468	0.222256	4.4215	0.0354888	0.0578261	X
Ccdc80	1.24759	0.237559	0.26758	1.15623	0.28225	0.328768	X
Cd47	0.77383	-0.207608	0.17756	1.38748	0.238831	0.289006	X
Alcam	0.852195	0.120161	0.45668	0.706143	0.400727	0.438819	X
Col8a1	1.58442	0.00887058	0.283452	1.38813	0.238722	0.289006	X
Epha3	0.438761	0.357079	0.47196	1.65858	0.197795	0.246335	X
Cxadr	0.314477	-0.521742	0.509658	1.62067	0.202998	0.251997	X
Adamts1	0.571415	-0.215829	0.385992	0.721717	0.395581	0.433647	X
Ifnar2	0.502669	-0.0755036	0.212372	0.453737	0.500565	0.53746	X
Pigp	0.393936	0.002465	0.243063	3.16363	0.0752955	0.108455	X
Ezr	0.364971	0.348196	0.306075	1.98334	0.159039	0.206787	X
Fndc1	0.703821	0.217614	0.343846	2.12825	0.144605	0.189517	X
Smoc2	0.937797	-0.0857607	0.270879	0.740657	0.389451	0.429059	X
Thbs2	1.26055	-0.243332	0.20677	3.49973	0.0613789	0.0917102	X
Cdkn1a	0.317583	-0.270649	0.386846	0.886731	0.346365	0.388204	X
Pi16	0.231812	0.328307	0.861035	0.144684	0.703668	0.720556	X
Tapbp	1.1329	-0.152955	0.167245	3.10016	0.0782844	0.11189	X
H2-K1	1.29669	0.242618	0.216591	1.69469	0.192984	0.242176	X
H2-D1	1.86131	0.117062	0.181179	0.453657	0.500603	0.53746	X
H2-T23	0.390421	-0.0662755	0.276807	0.690262	0.406075	0.444253	X
Gm26917	11.7118	-0.962784	0.299023	13.1166			X
Ccnd3	0.504061	-0.238835	0.214521	1.28957	0.256127	0.306077	X
Cyp1b1	0.688788	0.257211	0.325475	3.92885	0.0474643	0.0734931	X
Cox7a2l	0.340391	0.261269	0.291661	4.30839	0.0379248	0.0612754	X
Epcam	0.0449143	0.139979	2.1645	0.0365761	0.848331	0.852772	X
Ttr	1.88431	0.794098	0.346305	7.86517			X
Lox	0.463476	-0.0278459	0.287629	0.249784	0.617227	0.640581	X
Ppic	0.587374	-0.143134	0.214784	1.23406	0.266619	0.316309	X
Cd74	2.52209	1.325	0.376561	10.5424			X
Slc26a2	1.27451	0.0457139	0.312005	0.740254	0.38958	0.429059	X
Lman1	0.747269	0.126464	0.186999	1.84216	0.174698	0.223117	X
Atp5a1	0.809622	0.043529	0.177592	0.238432	0.625341	0.647835	X
Ppp1ca	0.380908	0.0104053	0.2418	0.858321	0.354209	0.394631	X
Cd248	0.301835	-0.363859	0.344012	2.98338	0.0841237	0.119643	X
Efemp2	0.745029	0.174713	0.198502	0.945712	0.330813	0.375465	X
Slc3a2	0.906867	-0.237985	0.220282	3.10233	0.0781803	0.11188	X
Rfk	0.674616	0.0740747	0.2628	0.22419	0.635866	0.657556	X
Pcsk5	0.496661	0.0358804	0.353208	3.81221	0.0508804	0.0773275	X
Anxa1	0.437478	0.128197	0.273606	6.91454			X
Il33	0.545027	-0.0546329	0.281451	0.0807971	0.77622	0.78508	X
Acta2	0.12134	-0.999906	1.53768	0.545556			X
Ifit1	0.142534	-0.760742	0.629218	2.14795	0.142761	0.18786	X
Rbp4	0.266796	0.255573	0.853699	0.262283			X
Ndufb8	0.396946	-0.143581	0.223831	3.11918	0.0773758	0.111005	X
Sfr1	0.502331	0.353172	0.2386	2.40261	0.121133	0.163211	X
Add3	0.872498	-0.0408246	0.196534	1.95458	0.162094	0.209812	X
mt-Co1	48.5193	-0.0295154	0.125104	1.60068	0.205808	0.254936	X
mt-Co2	37.9062	-0.154077	0.126301	3.85863	0.0494907	0.0759165	X
mt-Co3	57.9614	-0.154805	0.12173	2.71342	0.0995076	0.138112	X
mt-Nd4l	31.7712	0.0956563	0.1317	2.7768	0.0956391	0.133224	X
mt-Cytb	63.4898	-0.0984766	0.127299	1.36037	0.243473	0.293083	X
Atp6v1g3	0.0749397	16.57	108.212	2.08006			X
Cldn7	0.0349445	15.5431	108.418	2.14985	0.142584	0.18786	X
