# Supplementary material for: The meningeal transcriptional response to traumatic brain injury and aging
Source: eLife. 2023 Jan 3;12:e81154. doi: 10.7554/eLife.81154 (PMC9810333; doi:10.7554/eLife.81154)
Supplement: Figure 3—source data 3. [file elife-81154-fig3-data3.xlsx]

## Sheet: Sheet1
Sham	TBI
4.45443	6.866
4.46825	5.9465
4.538	4.2457
3.7388	6.38123
3.94968	6.2262
