# Supplementary material for: The meningeal transcriptional response to traumatic brain injury and aging
Source: eLife. 2023 Jan 3;12:e81154. doi: 10.7554/eLife.81154 (PMC9810333; doi:10.7554/eLife.81154)
Supplement: Figure 3—source data 4. [file elife-81154-fig3-data4.xlsx]

## Sheet: Sheet1
source	term_name	term_id	adjusted_p_value	negative_log10_of_adjusted_p_value	term_size	query_size	intersection_size	effective_domain_size	intersections
KEGG	Parkinson disease	KEGG:05012	1.95e-30	29.7103	241	227	51	8480	COX5B,ATP5C1,TUBB4B,ATP5G3,ATP5E,NDUFB11,SLC25A5,NDUFA1,COX7B,UQCRH,PARK7,COX6A1,UBC,SEM1,NDUFA5,NDUFA3,CALM3,COX6B1,NDUFC2,NDUFS7,UQCR11,ATP5B,NDUFA13,VDAC2,PSMB5,COX5A,COX7A2,UQCR10,RPS27A,VDAC1,ATP5G1,PSMB3,PSMA2,TUBB2A,UQCRB,PSMA3,NDUFB9,TUBA1B,ATP5G2,NDUFB4,ATP5J,PSMB1,NDUFB10,DUSP1,NDUFV3,NDUFA7,TUBB5,NDUFA11,COX8A,MT-ND2,MT-ATP8
KEGG	Oxidative phosphorylation	KEGG:00190	1.73e-29	28.7626	127	227	39	8480	COX5B,ATP5C1,ATP5G3,ATP5E,NDUFB11,NDUFA1,COX7B,ATP6V1G1,UQCRH,ATP6V0B,COX6A1,ATP5J2,NDUFA5,ATP6V1F,NDUFA3,COX6B1,NDUFC2,NDUFS7,UQCR11,ATP5B,NDUFA13,COX5A,COX7A2,UQCR10,ATP5G1,UQCRB,NDUFB9,ATP5G2,NDUFB4,ATP5J,ATP6V0C,NDUFB10,ATP6V0E,NDUFV3,NDUFA7,NDUFA11,COX8A,MT-ND2,MT-ATP8
KEGG	Prion disease	KEGG:05020	1.45e-25	24.8377	261	227	48	8480	COX5B,ATP5C1,TUBB4B,ATP5G3,ATP5E,NDUFB11,SLC25A5,NDUFA1,COX7B,UQCRH,COX6A1,SEM1,NDUFA5,NDUFA3,COX6B1,NDUFC2,NDUFS7,UQCR11,ATP5B,NDUFA13,CYBA,VDAC2,PSMB5,COX5A,COX7A2,UQCR10,VDAC1,ATP5G1,PSMB3,PSMA2,TUBB2A,UQCRB,PSMA3,NDUFB9,TUBA1B,ATP5G2,NDUFB4,ATP5J,PSMB1,NDUFB10,NDUFV3,NDUFA7,TUBB5,NDUFA11,EGR1,COX8A,MT-ND2,MT-ATP8
KEGG	Huntington disease	KEGG:05016	2.36e-21	20.627	293	227	46	8480	COX5B,ATP5C1,TUBB4B,ATP5G3,ATP5E,NDUFB11,SLC25A5,NDUFA1,COX7B,UQCRH,COX6A1,SEM1,NDUFA5,NDUFA3,COX6B1,NDUFC2,NDUFS7,UQCR11,ATP5B,NDUFA13,VDAC2,PSMB5,COX5A,COX7A2,UQCR10,VDAC1,ATP5G1,PSMB3,PSMA2,TUBB2A,UQCRB,PSMA3,NDUFB9,TUBA1B,ATP5G2,NDUFB4,ATP5J,PSMB1,NDUFB10,NDUFV3,NDUFA7,TUBB5,NDUFA11,COX8A,MT-ND2,MT-ATP8
KEGG	Alzheimer disease	KEGG:05010	4.4e-21	20.3563	357	227	50	8480	COX5B,ATP5C1,TUBB4B,ATP5G3,ATP5E,NDUFB11,SLC25A5,NDUFA1,COX7B,UQCRH,COX6A1,SEM1,NDUFA5,GAPDH,NDUFA3,CALM3,APOE,COX6B1,NDUFC2,NDUFS7,UQCR11,LRP1,ATP5B,NDUFA13,VDAC2,PSMB5,COX5A,COX7A2,UQCR10,VDAC1,ATP5G1,PSMB3,PSMA2,TUBB2A,UQCRB,PSMA3,NDUFB9,TUBA1B,ATP5G2,NDUFB4,ATP5J,PSMB1,NDUFB10,NDUFV3,NDUFA7,TUBB5,NDUFA11,COX8A,MT-ND2,MT-ATP8
KEGG	Amyotrophic lateral sclerosis	KEGG:05014	5.7e-21	20.2445	359	227	50	8480	COX5B,ATP5C1,TUBB4B,ATP5G3,ATP5E,NDUFB11,NDUFA1,COX7B,UQCRH,COX6A1,ACTB,SEM1,NDUFA5,NDUFA3,COX6B1,NDUFC2,NDUFS7,UQCR11,ATP5B,NDUFA13,GABARAPL2,PSMB5,COX5A,COX7A2,UQCR10,SQSTM1,VDAC1,PFN1,ATP5G1,PSMB3,ACTG1,PSMA2,TUBB2A,UQCRB,PSMA3,NDUFB9,TUBA1B,ATP5G2,NDUFB4,ATP5J,PSMB1,NDUFB10,NDUFV3,NDUFA7,TUBB5,NDUFA11,COX8A,NXF1,MT-ND2,MT-ATP8
KEGG	Thermogenesis	KEGG:04714	8.06e-18	17.0935	221	227	37	8480	COX5B,ATP5C1,ATP5G3,ATP5E,NDUFB11,NDUFA1,COX7B,RPS6,UQCRH,COX6A1,ACTB,ATP5J2,NDUFA5,NDUFA3,COX6B1,NDUFC2,NDUFS7,UQCR11,ATP5B,NDUFA13,COX5A,COX7A2,UQCR10,ATP5G1,ACTG1,UQCRB,NDUFB9,ATP5G2,NDUFB4,ATP5J,NDUFB10,NDUFV3,NDUFA7,NDUFA11,COX8A,MT-ND2,MT-ATP8
KEGG	Non-alcoholic fatty liver disease	KEGG:04932	5.51e-11	10.2591	146	227	24	8480	COX5B,NDUFB11,NDUFA1,COX7B,UQCRH,COX6A1,NDUFA5,NDUFA3,COX6B1,NDUFC2,NDUFS7,UQCR11,NDUFA13,COX5A,COX7A2,UQCR10,UQCRB,NDUFB9,NDUFB4,NDUFB10,NDUFV3,NDUFA7,NDUFA11,COX8A
KEGG	Phagosome	KEGG:04145	9.27e-08	7.03283	173	227	22	8480	MRC1,TUBB4B,DYNC1I2,SEC61B,ATP6V1G1,ATP6V0B,ACTB,ATP6V1F,LAMP1,CYBA,MRC2,ACTG1,TUBB2A,CTSL,TUBA1B,ATP6V0C,ATP6V0E,H2-DMB1,H2-AB1,H2-AA,H2-EB1,TUBB5
KEGG	Cardiac muscle contraction	KEGG:04260	2.41071e-05	4.61786	83	227	13	8480	COX5B,ATP1B1,COX7B,TPM3,UQCRH,COX6A1,COX6B1,UQCR11,COX5A,COX7A2,UQCR10,UQCRB,COX8A
KEGG	Retrograde endocannabinoid signaling	KEGG:04723	0.000556845	3.25427	143	227	15	8480	NDUFB11,NDUFA1,GNG5,NDUFA5,NDUFA3,NDUFC2,NDUFS7,NDUFA13,NDUFB9,NDUFB4,NDUFB10,NDUFV3,NDUFA7,NDUFA11,MT-ND2
KEGG	Rheumatoid arthritis	KEGG:05323	0.00122964	2.91022	84	227	11	8480	CTSK,ATP6V1G1,ATP6V0B,ATP6V1F,CTSL,ATP6V0C,ATP6V0E,H2-DMB1,H2-AB1,H2-AA,H2-EB1
KEGG	Cholesterol metabolism	KEGG:04979	0.0275565	1.55978	49	227	7	8480	ABCA1,LRPAP1,APOE,LRP1,VDAC2,VDAC1,TSPO
KEGG	Asthma	KEGG:05310	0.0419816	1.37694	25	227	5	8480	FCER1G,H2-DMB1,H2-AB1,H2-AA,H2-EB1
