# Supplementary material for: The meningeal transcriptional response to traumatic brain injury and aging
Source: eLife. 2023 Jan 3;12:e81154. doi: 10.7554/eLife.81154 (PMC9810333; doi:10.7554/eLife.81154)
Supplement: Figure 4—source data 1. [file elife-81154-fig4-data1.xlsx]

## Sheet: Sheet1
Cell Population	Direction	Number	Reorder
T Cells	Downregulated	286	1
B Cells	Downregulated	158	2
Dendritic Cells	Downregulated	149	3
NK Cells	Downregulated	0	4
Neutrophils	Downregulated	0	5
Plasmacytoid Dendritic Cells	Downregulated	0	6
T Cells	Upregulated	151	1
B Cells	Upregulated	103	2
Dendritic Cells	Upregulated	183	3
NK Cells	Upregulated	4	4
Neutrophils	Upregulated	0	5
Plasmacytoid Dendritic Cells	Upregulated	0	6
