# Supplementary material for: The meningeal transcriptional response to traumatic brain injury and aging
Source: eLife. 2023 Jan 3;12:e81154. doi: 10.7554/eLife.81154 (PMC9810333; doi:10.7554/eLife.81154)
Supplement: Figure 4—source data 2. — Tables depicting the top 10 most significant cluster-defining genes for T cell populations. Raw data for top cluster defining genes for each cell population. [file elife-81154-fig4-data2.xlsx]

## Sheet: Sheet1
p_val	avg_log2FC	pct.1	pct.2	p_val_adj	cluster	gene			CD8+ T Cells			Th2 Cells			Th17 Cells			NK/NKT Cells
Ms4a6b	4.07466e-48	1.61009	0.744	0.232	7.04834e-44	0	Ms4a6b		Gene	P_adj		Gene	P_adj		Gene	P_adj		Gene	P_adj
Ifi27l2a	4.9665e-48	2.40177	0.593	0.089	8.59105e-44	0	Ifi27l2a		Ms4a6b	7.05e-44		Lpcat2	1.37e-68		Cd163l1	5.42e-83		Fcer1g	2.81e-71
Ms4a4b	2.01765e-47	1.44754	0.903	0.327	3.49013e-43	0	Ms4a4b		Ifi27l2a	8.59e-44		Rnf128	1.59e-66		Tcrg-V6	1.71e-82		Klrb1c	9.32e-55
Lck	6.64385e-46	1.23869	0.895	0.379	1.14925e-41	0	Lck		Ms4a4b	3.49e-43		Il1rl1	4.82e-65		Blk	8.14e-79		Cd7	6.33e-53
Slfn1	4.41802e-43	1.50279	0.484	0.049	7.64229e-39	0	Slfn1		Lck	1.15e-41		Cd81	9.43e-59		Rorc	1.13e-64		Tyrobp	7.32e-52
Cd3e	2.85953e-41	1.25769	0.911	0.301	4.94641e-37	0	Cd3e		Slfn1	7.64e-39		Gata3	2.7e-45		Kcnk1	2.72e-64		Xcl1	2.03e-50
Cd3g	4.49472e-40	1.35058	0.88	0.334	7.77497e-36	0	Cd3g		Cd3e	4.95e-37		Ltb4r1	3.69e-45		Aqp3	5.93e-64		Ncr1	1.61e-48
Cd2	1.08409e-36	1.28537	0.74	0.249	1.87526e-32	0	Cd2		Cd3g	7.77e-36		Cysltr1	3.73e-43		Actn2	3.92e-61		Klrd1	1.95e-39
Cd3d	8.78332e-36	1.18659	0.857	0.316	1.51934e-31	0	Cd3d		Cd2	1.88e-32		Arg1	4.02e-41		Sox13	4.85e-54		Klrk1	3.62e-37
Cd28	1.58694e-35	1.23616	0.523	0.098	2.7451e-31	0	Cd28		Cd3d	1.52e-31		Slc7a8	1.32e-40		Serpinb1a	1.41e-52		Klre1	5.7e-36
Gimap4	6.99528e-28	1.10297	0.76	0.294	1.21004e-23	0	Gimap4		Cd28	2.75e-31		Ccdc184	2.55e-40		Ly6g5b	2.54e-50		Cd160	5.71e-32
Trac	7.90418e-28	1.25734	0.492	0.122	1.36726e-23	0	Trac		*Each graph depicts top 10 cluster-defining genes
Rac2	5.33205e-27	0.87616	0.907	0.755	9.22339e-23	0	Rac2
Gm8369	1.01747e-25	0.981934	0.298	0.027	1.76001e-21	0	Gm8369
Cxcr3	3.62765e-25	1.12799	0.64	0.247	6.27511e-21	0	Cxcr3
Gimap7	5.13094e-25	1.24292	0.57	0.207	8.87551e-21	0	Gimap7
Cd5	1.1333e-24	1.10568	0.457	0.125	1.96038e-20	0	Cd5
Ly6c2	8.07827e-24	1.71591	0.504	0.149	1.39738e-19	0	Ly6c2
Fyb	1.63043e-23	0.778957	0.752	0.374	2.82032e-19	0	Fyb
Cd40lg	1.84494e-23	1.22503	0.318	0.047	3.19138e-19	0	Cd40lg
Itgb1	3.58558e-23	1.12287	0.698	0.347	6.20234e-19	0	Itgb1
Cd8b1	5.44077e-22	2.03426	0.283	0.036	9.41145e-18	0	Cd8b1
Sh2d1a	3.00156e-21	0.991351	0.36	0.08	5.1921e-17	0	Sh2d1a
AW112010	3.50374e-21	0.961324	0.857	0.601	6.06077e-17	0	AW112010
Cd4	1.20104e-20	0.974689	0.267	0.031	2.07756e-16	0	Cd4
Epsti1	5.36163e-19	0.904529	0.593	0.267	9.27455e-15	0	Epsti1
Nkg7	3.09024e-18	0.976208	0.655	0.272	5.34549e-14	0	Nkg7
Gramd3	4.17454e-18	0.771111	0.326	0.078	7.22112e-14	0	Gramd3
Cd52	6.77311e-18	0.737255	0.922	0.808	1.17161e-13	0	Cd52
Cd6	5.16125e-17	1.00728	0.287	0.062	8.92794e-13	0	Cd6
Coro1a	5.88671e-17	0.57356	0.922	0.829	1.01828e-12	0	Coro1a
Lsp1	1.04951e-15	0.786475	0.798	0.555	1.81545e-11	0	Lsp1
Gimap6	1.57212e-15	0.692096	0.779	0.486	2.71945e-11	0	Gimap6
Cd247	5.59655e-15	0.534258	0.496	0.207	9.68091e-11	0	Cd247
Tmsb10	5.75558e-15	0.537983	0.957	0.891	9.956e-11	0	Tmsb10
Ccl5	1.18476e-14	1.79513	0.531	0.256	2.0494e-10	0	Ccl5
Actb	1.57388e-14	0.532441	0.977	0.913	2.7225e-10	0	Actb
Hcst	1.32932e-13	0.655962	0.826	0.67	2.29946e-09	0	Hcst
Slfn2	3.21119e-13	0.697777	0.729	0.512	5.55471e-09	0	Slfn2
Gm2682	4.37276e-13	0.71987	0.384	0.145	7.564e-09	0	Gm2682
Dgka	4.70909e-13	0.612876	0.5	0.227	8.14578e-09	0	Dgka
Cnp	7.22269e-13	0.78647	0.453	0.216	1.24938e-08	0	Cnp
Lat	9.10045e-13	0.63684	0.76	0.559	1.5742e-08	0	Lat
Arhgdib	9.3774e-13	0.55179	0.884	0.757	1.6221e-08	0	Arhgdib
Arl4c	9.45987e-13	0.711461	0.353	0.131	1.63637e-08	0	Arl4c
Myl12b	1.24248e-12	0.579808	0.872	0.666	2.14924e-08	0	Myl12b
Cd48	2.19635e-12	0.665357	0.605	0.372	3.79925e-08	0	Cd48
Crip1	2.37078e-12	0.711507	0.845	0.653	4.10098e-08	0	Crip1
Hopx	3.21863e-12	0.585016	0.372	0.147	5.56758e-08	0	Hopx
Ifi47	3.46908e-12	0.786042	0.64	0.421	6.00082e-08	0	Ifi47
Ehd3	8.91775e-12	0.564837	0.264	0.08	1.54259e-07	0	Ehd3
Psmb8	9.10268e-12	0.626083	0.849	0.682	1.57458e-07	0	Psmb8
Atp1b3	1.59662e-11	0.807584	0.519	0.296	2.76183e-07	0	Atp1b3
Il2rb	2.17751e-11	0.482228	0.663	0.356	3.76666e-07	0	Il2rb
Cnn2	2.38937e-11	0.603612	0.826	0.644	4.13314e-07	0	Cnn2
Gimap3	2.58197e-11	0.569693	0.86	0.666	4.46629e-07	0	Gimap3
Lgals1	3.56046e-11	0.718062	0.671	0.396	6.15888e-07	0	Lgals1
Il21r	4.39429e-11	0.840229	0.341	0.14	7.60125e-07	0	Il21r
Sp100	5.63995e-11	0.46911	0.698	0.474	9.75599e-07	0	Sp100
Dusp2	8.31176e-11	0.591129	0.388	0.165	1.43777e-06	0	Dusp2
Tcf7	1.18925e-10	0.693853	0.357	0.156	2.05717e-06	0	Tcf7
Sit1	1.4486e-10	0.514462	0.252	0.078	2.50579e-06	0	Sit1
Actg1	2.65935e-10	0.552988	0.919	0.82	4.60015e-06	0	Actg1
Npc2	3.06533e-10	0.622801	0.597	0.41	5.30241e-06	0	Npc2
Fau	4.8303e-10	0.369957	0.957	0.869	8.35545e-06	0	Fau
Fam78a	7.85314e-10	0.553714	0.264	0.094	1.35844e-05	0	Fam78a
Psmb9	1.07062e-09	0.537826	0.593	0.372	1.85196e-05	0	Psmb9
Ppp1r18	1.50511e-09	0.559626	0.752	0.588	2.60355e-05	0	Ppp1r18
Rnf138	1.76767e-09	0.51675	0.326	0.143	3.05772e-05	0	Rnf138
2010111I01Rik	4.49434e-09	0.494962	0.275	0.107	7.77432e-05	0	2010111I01Rik
Klf2	5.20452e-09	1.20559	0.298	0.134	9.00278e-05	0	Klf2
Ccnd3	6.8841e-09	0.425055	0.651	0.432	0.000119081	0	Ccnd3
Thy1	3.56494e-08	0.48309	0.837	0.677	0.000616663	0	Thy1
Il16	4.67677e-08	0.504723	0.562	0.372	0.000808988	0	Il16
Igtp	5.55156e-08	0.737267	0.337	0.167	0.000960309	0	Igtp
Pfdn5	5.82439e-08	0.411023	0.822	0.655	0.0010075	0	Pfdn5
Pfn1	6.99774e-08	0.387665	0.938	0.851	0.00121047	0	Pfn1
Twf2	8.08362e-08	0.561966	0.422	0.252	0.00139831	0	Twf2
Lyst	9.13388e-08	0.731896	0.298	0.134	0.00157998	0	Lyst
Cdc42se1	9.64611e-08	0.553205	0.481	0.305	0.00166858	0	Cdc42se1
Dnajc15	1.06458e-07	0.52777	0.469	0.29	0.00184151	0	Dnajc15
Ctsw	1.33003e-07	0.292317	0.601	0.341	0.00230069	0	Ctsw
Add3	1.43871e-07	0.569412	0.318	0.151	0.00248868	0	Add3
Leprotl1	1.90549e-07	0.569236	0.64	0.468	0.00329611	0	Leprotl1
Rps13	2.14574e-07	0.332736	0.915	0.833	0.0037117	0	Rps13
Rpl24	2.30699e-07	0.390961	0.911	0.791	0.00399064	0	Rpl24
Bin2	2.55202e-07	0.584745	0.601	0.445	0.00441448	0	Bin2
Stat1	2.66809e-07	0.291586	0.477	0.272	0.00461527	0	Stat1
Rhog	2.69583e-07	0.461188	0.554	0.385	0.00466325	0	Rhog
Stk17b	2.74484e-07	0.396391	0.698	0.521	0.00474802	0	Stk17b
Ass1	2.82515e-07	0.66185	0.337	0.176	0.00488694	0	Ass1
Prkca	3.06396e-07	0.380251	0.275	0.122	0.00530003	0	Prkca
Fkbp1a	4.65649e-07	0.538433	0.562	0.388	0.0080548	0	Fkbp1a
Ptpn22	6.10551e-07	0.335193	0.453	0.274	0.0105613	0	Ptpn22
Lef1	8.96114e-07	0.526541	0.291	0.143	0.015501	0	Lef1
2021-09-01	9.20586e-07	0.421039	0.81	0.675	0.0159243	0	2021-09-01
Wipf1	9.45684e-07	0.387178	0.492	0.33	0.0163584	0	Wipf1
Gmfg	1.16533e-06	0.474393	0.636	0.494	0.0201578	0	Gmfg
Ubb	1.19449e-06	0.320828	0.922	0.878	0.0206624	0	Ubb
Gpi1	1.34158e-06	0.38897	0.667	0.523	0.0232066	0	Gpi1
Tmem9b	1.34314e-06	0.457395	0.384	0.225	0.0232336	0	Tmem9b
Gnai2	1.37491e-06	0.455938	0.601	0.452	0.0237831	0	Gnai2
Itgb2	1.41235e-06	0.419043	0.69	0.526	0.0244308	0	Itgb2
Rps27	1.90587e-06	0.330592	0.934	0.84	0.0329677	0	Rps27
Saraf	2.57421e-06	0.410949	0.593	0.448	0.0445286	0	Saraf
Cotl1	2.66399e-06	0.472193	0.612	0.454	0.0460817	0	Cotl1
2021-09-09	3.11948e-06	0.506303	0.5	0.339	0.0539608	0	2021-09-09
Abracl	3.52508e-06	0.498878	0.488	0.336	0.0609769	0	Abracl
9930111J21Rik2	3.59766e-06	0.466979	0.267	0.134	0.0622324	0	9930111J21Rik2
Jpt1	3.98807e-06	0.390914	0.624	0.452	0.0689856	0	Jpt1
Gm26740	4.22313e-06	0.297975	0.395	0.227	0.0730517	0	Gm26740
Myl12a	5.05881e-06	0.391151	0.725	0.599	0.0875074	0	Myl12a
Trbc2	5.49802e-06	0.501942	0.535	0.388	0.0951048	0	Trbc2
Mrpl52	5.84388e-06	0.400282	0.558	0.403	0.101087	0	Mrpl52
Kif21b	6.07104e-06	0.485838	0.333	0.189	0.105017	0	Kif21b
Itga4	6.71228e-06	0.277764	0.55	0.37	0.116109	0	Itga4
Rps15a	9.14741e-06	0.33212	0.953	0.831	0.158232	0	Rps15a
Rpl13a	1.15119e-05	0.360861	0.733	0.626	0.199133	0	Rpl13a
Ifi208	1.41592e-05	0.487771	0.291	0.16	0.244925	0	Ifi208
Rpl27	1.54674e-05	0.306304	0.876	0.757	0.267555	0	Rpl27
Capza1	1.68053e-05	0.316378	0.585	0.437	0.290698	0	Capza1
Hsd11b1	1.91427e-05	0.361163	0.306	0.169	0.331131	0	Hsd11b1
Ifi27	1.94906e-05	0.441331	0.376	0.241	0.337149	0	Ifi27
Tpst2	1.9675e-05	0.374598	0.422	0.265	0.340339	0	Tpst2
Clta	2.20166e-05	0.328155	0.671	0.537	0.380843	0	Clta
Cfl1	2.3176e-05	0.300012	0.891	0.791	0.400898	0	Cfl1
Polr1d	2.34492e-05	0.384059	0.647	0.49	0.405625	0	Polr1d
Tbx21	2.40278e-05	0.351361	0.275	0.147	0.415633	0	Tbx21
Ifitm10	2.48158e-05	0.408963	0.306	0.171	0.429263	0	Ifitm10
Adgre5	2.64146e-05	0.330169	0.566	0.408	0.456919	0	Adgre5
Psma2	2.68952e-05	0.369367	0.574	0.443	0.465233	0	Psma2
Vasp	2.94276e-05	0.327002	0.574	0.432	0.509038	0	Vasp
Frmd8	3.15335e-05	0.354458	0.275	0.149	0.545466	0	Frmd8
1810037I17Rik	3.38746e-05	0.292125	0.523	0.379	0.585963	0	1810037I17Rik
Ptpn18	3.41234e-05	0.321675	0.841	0.731	0.590266	0	Ptpn18
Gbp7	3.43022e-05	0.350579	0.349	0.205	0.593359	0	Gbp7
Ctsa	3.54129e-05	0.474563	0.337	0.205	0.612573	0	Ctsa
Ypel3	3.64151e-05	0.443726	0.64	0.499	0.629908	0	Ypel3
Psme2	3.70131e-05	0.35064	0.729	0.597	0.640252	0	Psme2
Cox7a2l	3.70462e-05	0.365154	0.612	0.463	0.640824	0	Cox7a2l
Calm1	3.70803e-05	0.339693	0.857	0.737	0.641414	0	Calm1
Pttg1	4.08592e-05	0.491748	0.376	0.252	0.706782	0	Pttg1
Cytip	4.45431e-05	0.377377	0.492	0.345	0.770507	0	Cytip
Cd27	4.6233e-05	0.401906	0.391	0.256	0.799738	0	Cd27
Sub1	5.25149e-05	0.364798	0.76	0.628	0.908403	0	Sub1
Arpc1b	5.35362e-05	0.298152	0.845	0.699	0.926069	0	Arpc1b
Fyn	5.50613e-05	0.278978	0.364	0.223	0.952451	0	Fyn
Gapdh	5.59874e-05	0.349663	0.771	0.648	0.96847	0	Gapdh
Eif3k	5.89662e-05	0.309767	0.705	0.566	1	0	Eif3k
Stk38	6.01512e-05	0.494867	0.368	0.236	1	0	Stk38
Pglyrp1	6.57939e-05	0.308455	0.314	0.178	1	0	Pglyrp1
Grap	7.12358e-05	0.414186	0.372	0.254	1	0	Grap
Ddx24	7.21357e-05	0.427225	0.523	0.396	1	0	Ddx24
Anxa6	7.4667e-05	0.296584	0.64	0.488	1	0	Anxa6
Gimap9	7.6483e-05	0.403348	0.438	0.312	1	0	Gimap9
Foxp1	9.00153e-05	0.332034	0.399	0.256	1	0	Foxp1
Mcl1	9.40648e-05	0.369247	0.279	0.158	1	0	Mcl1
Ucp2	9.7652e-05	0.343201	0.818	0.702	1	0	Ucp2
Prkch	0.000102287	0.388609	0.422	0.285	1	0	Prkch
Aph1a	0.000103858	0.323635	0.333	0.207	1	0	Aph1a
S100a11	0.000132466	0.369994	0.748	0.617	1	0	S100a11
Chmp4b	0.000174731	0.388048	0.329	0.22	1	0	Chmp4b
Tsc22d3	0.000180318	0.39805	0.314	0.194	1	0	Tsc22d3
Capzb	0.000186176	0.275425	0.733	0.615	1	0	Capzb
Ly6a	0.000189621	0.352613	0.663	0.503	1	0	Ly6a
Gng5	0.000195033	0.278285	0.764	0.673	1	0	Gng5
Ppp4c	0.000200017	0.260773	0.55	0.41	1	0	Ppp4c
Hmgb2	0.000214075	0.515903	0.616	0.526	1	0	Hmgb2
Ctss	0.000236055	0.25174	0.314	0.194	1	0	Ctss
Mettl23	0.000248814	0.439919	0.434	0.31	1	0	Mettl23
Sh3kbp1	0.000307566	0.291021	0.461	0.334	1	0	Sh3kbp1
Pycard	0.000315338	0.297957	0.372	0.249	1	0	Pycard
Pla2g16	0.000321124	0.298438	0.484	0.352	1	0	Pla2g16
Cap1	0.000333097	0.318499	0.597	0.492	1	0	Cap1
Lpxn	0.000480752	0.32171	0.353	0.241	1	0	Lpxn
Sash3	0.000482561	0.351498	0.465	0.361	1	0	Sash3
Atp6v1d	0.000496908	0.460794	0.329	0.225	1	0	Atp6v1d
Psmd4	0.000572203	0.313905	0.461	0.352	1	0	Psmd4
Clec2i	0.000572746	0.357832	0.279	0.171	1	0	Clec2i
Rbm3	0.000598643	0.319664	0.713	0.575	1	0	Rbm3
Apbb1ip	0.000658918	0.257422	0.667	0.592	1	0	Apbb1ip
Cmc1	0.000664539	0.27517	0.26	0.16	1	0	Cmc1
Ripor2	0.000695359	0.463103	0.26	0.16	1	0	Ripor2
Sars	0.000767355	0.343868	0.38	0.269	1	0	Sars
H2-T22	0.000791387	0.329849	0.57	0.445	1	0	H2-T22
Hmgn2	0.000793601	0.338867	0.345	0.236	1	0	Hmgn2
Lbh	0.000795451	0.289703	0.329	0.22	1	0	Lbh
Rab8a	0.000868849	0.297953	0.453	0.354	1	0	Rab8a
Cox17	0.000968244	0.288523	0.403	0.294	1	0	Cox17
Nfatc1	0.00118166	0.359721	0.256	0.16	1	0	Nfatc1
Eif3f	0.00119357	0.258812	0.798	0.702	1	0	Eif3f
Arl6ip1	0.00120071	0.25469	0.744	0.657	1	0	Arl6ip1
Wdr1	0.0012562	0.264216	0.605	0.492	1	0	Wdr1
Rap1b	0.00127243	0.277617	0.504	0.392	1	0	Rap1b
Btg1	0.00142014	0.260558	0.698	0.595	1	0	Btg1
Gimap1	0.00144639	0.301788	0.702	0.581	1	0	Gimap1
Arpc4	0.00151824	0.254783	0.597	0.492	1	0	Arpc4
Cox6b1	0.00164543	0.360041	0.671	0.595	1	0	Cox6b1
Ywhah	0.00166771	0.263948	0.558	0.454	1	0	Ywhah
Mrps16	0.00173967	0.319017	0.376	0.283	1	0	Mrps16
Elob	0.00175341	0.297614	0.779	0.646	1	0	Elob
Ccdc85b	0.00194774	0.255048	0.333	0.238	1	0	Ccdc85b
S100a10	0.00204631	0.320858	0.864	0.753	1	0	S100a10
Vsir	0.00207619	0.29226	0.357	0.245	1	0	Vsir
1110008P14Rik	0.00231097	0.264734	0.283	0.189	1	0	1110008P14Rik
Mkrn1	0.00234995	0.319716	0.326	0.234	1	0	Mkrn1
Cox6c	0.00270479	0.265313	0.756	0.664	1	0	Cox6c
Fam107b	0.00278895	0.288928	0.45	0.343	1	0	Fam107b
Srp72	0.00285137	0.2679	0.26	0.171	1	0	Srp72
Lasp1	0.00290456	0.325501	0.349	0.256	1	0	Lasp1
Vamp8	0.00303031	0.347224	0.488	0.405	1	0	Vamp8
S100a13	0.00314982	0.266034	0.562	0.465	1	0	S100a13
Supt4a	0.00320085	0.313877	0.453	0.361	1	0	Supt4a
Dazap2	0.00330356	0.288245	0.558	0.481	1	0	Dazap2
Psmb1	0.00330813	0.270111	0.612	0.512	1	0	Psmb1
Cmtm7	0.00332506	0.291492	0.422	0.318	1	0	Cmtm7
Mxd4	0.00337731	0.336017	0.329	0.241	1	0	Mxd4
Tpm4	0.00362231	0.353328	0.368	0.276	1	0	Tpm4
Scamp3	0.00363889	0.340936	0.391	0.298	1	0	Scamp3
Nol7	0.00392928	0.262755	0.504	0.385	1	0	Nol7
Smc4	0.00405094	0.455281	0.326	0.247	1	0	Smc4
Ly9	0.00408877	0.279502	0.302	0.207	1	0	Ly9
Brk1	0.00420725	0.356692	0.399	0.316	1	0	Brk1
Mrpl58	0.00432887	0.268531	0.275	0.189	1	0	Mrpl58
Smarcd2	0.00460469	0.279071	0.26	0.176	1	0	Smarcd2
D8Ertd738e	0.00489795	0.272077	0.547	0.465	1	0	D8Ertd738e
Dnajb1	0.00516571	0.269494	0.384	0.285	1	0	Dnajb1
Nans	0.00541063	0.363061	0.264	0.189	1	0	Nans
Pdap1	0.00592303	0.2754	0.333	0.243	1	0	Pdap1
Cntrl	0.00597609	0.27666	0.26	0.178	1	0	Cntrl
Rcbtb2	0.00608865	0.316811	0.287	0.207	1	0	Rcbtb2
Higd1a	0.00616446	0.286722	0.419	0.332	1	0	Higd1a
Trim12a	0.00622843	0.264102	0.279	0.196	1	0	Trim12a
Ptpn1	0.00850721	0.366936	0.341	0.263	1	0	Ptpn1
Wasf2	0.00854256	0.328219	0.384	0.301	1	0	Wasf2
H2afv	0.00877493	0.279305	0.481	0.408	1	0	H2afv
Mrpl54	0.00914042	0.316371	0.26	0.183	1	0	Mrpl54
Lpcat2	7.90878e-73	1.92785	0.718	0.055	1.36806e-68	1	Lpcat2
Rnf128	9.18798e-71	1.98802	0.669	0.044	1.58934e-66	1	Rnf128
Il1rl1	2.78513e-69	1.55982	0.735	0.063	4.81772e-65	1	Il1rl1
Cd81	5.45074e-63	1.80984	0.74	0.105	9.42869e-59	1	Cd81
Gata3	1.56361e-49	1.73947	0.823	0.268	2.70472e-45	1	Gata3
Ltb4r1	2.13078e-49	1.4732	0.702	0.12	3.68583e-45	1	Ltb4r1
Cysltr1	2.159e-47	1.51989	0.47	0.032	3.73463e-43	1	Cysltr1
Arg1	2.32183e-45	1.59014	0.409	0.015	4.01631e-41	1	Arg1
Slc7a8	7.61893e-45	1.27762	0.431	0.021	1.31792e-40	1	Slc7a8
Ccdc184	1.47128e-44	1.329	0.359	0.004	2.54501e-40	1	Ccdc184
Ppp1cc	6.71477e-42	1.51176	0.823	0.359	1.16152e-37	1	Ppp1cc
Dach2	1.00747e-32	1.12082	0.287	0.008	1.74272e-28	1	Dach2
1810011H11Rik	1.30963e-32	1.28034	0.409	0.051	2.2654e-28	1	1810011H11Rik
Mdfic	4.52116e-32	1.11193	0.68	0.221	7.82071e-28	1	Mdfic
Itm2b	9.9474e-32	0.798215	0.983	0.865	1.7207e-27	1	Itm2b
Itm2c	3.55753e-31	1.1658	0.829	0.428	6.15382e-27	1	Itm2c
Zcchc10	3.95034e-31	1.01998	0.398	0.049	6.8333e-27	1	Zcchc10
Ptgir	1.18892e-30	1.0085	0.298	0.015	2.0566e-26	1	Ptgir
H2-Oa	1.57194e-30	1.14351	0.365	0.042	2.71914e-26	1	H2-Oa
Rplp1	2.25679e-29	0.777792	0.978	0.844	3.90379e-25	1	Rplp1
Slc6a13	8.60064e-29	1.08844	0.365	0.048	1.48774e-24	1	Slc6a13
Tspan13	9.30888e-29	1.14989	0.685	0.262	1.61025e-24	1	Tspan13
Rps8	3.06794e-27	0.671458	0.972	0.871	5.30692e-23	1	Rps8
Pard3	3.15235e-27	1.01596	0.276	0.017	5.45294e-23	1	Pard3
Lztfl1	1.20693e-26	1.16855	0.448	0.095	2.08775e-22	1	Lztfl1
Gm42031	2.28504e-26	1.23252	0.558	0.175	3.95267e-22	1	Gm42031
Lmo4	8.52241e-25	1.24082	0.47	0.118	1.47421e-20	1	Lmo4
Plxdc2	8.67956e-24	0.750955	0.282	0.027	1.50139e-19	1	Plxdc2
Ar	9.05882e-24	0.953422	0.442	0.101	1.56699e-19	1	Ar
Il9r	1.23956e-23	0.805499	0.254	0.019	2.14419e-19	1	Il9r
Il17rb	3.50868e-23	0.929063	0.276	0.027	6.06931e-19	1	Il17rb
Il7r	4.75486e-23	0.797076	0.89	0.456	8.22496e-19	1	Il7r
Il2ra	7.7428e-23	0.731528	0.464	0.112	1.33935e-18	1	Il2ra
Txnip	8.17373e-23	1.07416	0.878	0.616	1.41389e-18	1	Txnip
Ahcyl2	2.79043e-22	0.973113	0.431	0.106	4.82689e-18	1	Ahcyl2
Ccr2	8.85745e-22	1.11306	0.657	0.272	1.53216e-17	1	Ccr2
Ly6a1	1.28869e-21	0.974808	0.862	0.458	2.22918e-17	1	Ly6a
Rps19	1.2942e-21	0.711959	0.961	0.8	2.23871e-17	1	Rps19
Rps3a1	2.04071e-21	0.60358	0.972	0.867	3.53003e-17	1	Rps3a1
Ptma	3.32899e-21	0.659096	0.967	0.8	5.75848e-17	1	Ptma
Elovl5	1.35138e-20	0.922137	0.508	0.171	2.33761e-16	1	Elovl5
Rpl37a	2.35159e-20	0.609563	0.983	0.848	4.06777e-16	1	Rpl37a
Emb	7.06745e-20	0.661027	0.735	0.344	1.22253e-15	1	Emb
Rps24	7.11246e-20	0.542695	0.961	0.869	1.23031e-15	1	Rps24
Inpp4b	1.32121e-19	0.758385	0.812	0.454	2.28543e-15	1	Inpp4b
Rps29	2.63709e-19	0.602502	0.972	0.835	4.56165e-15	1	Rps29
Serinc3	3.9197e-19	0.789077	0.74	0.378	6.78031e-15	1	Serinc3
Bmp7	6.53962e-19	0.905343	0.359	0.086	1.13122e-14	1	Bmp7
Rps20	8.05545e-19	0.590382	0.972	0.837	1.39343e-14	1	Rps20
Rpl8	1.56337e-18	0.563076	0.967	0.852	2.70432e-14	1	Rpl8
Skp1a	1.60159e-18	0.902353	0.768	0.485	2.77043e-14	1	Skp1a
Nfkb1	2.60388e-18	0.834712	0.541	0.209	4.5042e-14	1	Nfkb1
Bzw2	4.28843e-18	0.95247	0.453	0.16	7.41813e-14	1	Bzw2
Rarg	1.69611e-17	0.745966	0.431	0.127	2.93393e-13	1	Rarg
Rpl21	2.4231e-17	0.540804	0.967	0.852	4.19148e-13	1	Rpl21
Rpl35	3.11087e-17	0.594626	0.934	0.797	5.38119e-13	1	Rpl35
Tmem176b	3.74984e-17	0.357326	0.657	0.236	6.48648e-13	1	Tmem176b
Slc3a2	4.12173e-17	0.860126	0.586	0.276	7.12977e-13	1	Slc3a2
Aldoa	7.23206e-17	0.847746	0.862	0.69	1.251e-12	1	Aldoa
Sptssa	1.34045e-16	0.896028	0.691	0.375	2.3187e-12	1	Sptssa
Rpl9	1.38378e-16	0.483974	0.978	0.857	2.39366e-12	1	Rpl9
Prnp	1.50126e-16	0.755179	0.254	0.044	2.59688e-12	1	Prnp
Rps10	1.68454e-16	0.513977	0.967	0.842	2.91392e-12	1	Rps10
Rpl26	2.56167e-16	0.601608	0.923	0.757	4.43119e-12	1	Rpl26
Glul	4.70705e-16	0.915641	0.453	0.169	8.14226e-12	1	Glul
Rps7	6.27203e-16	0.538083	0.95	0.816	1.08494e-11	1	Rps7
Rpl23	8.39524e-16	0.50379	0.961	0.846	1.45221e-11	1	Rpl23
Tnfsf11	9.66018e-16	0.762842	0.381	0.112	1.67102e-11	1	Tnfsf11
Ptpn13	1.15609e-15	0.335011	0.331	0.076	1.99981e-11	1	Ptpn13
Rpl13	1.23203e-15	0.45297	0.983	0.892	2.13116e-11	1	Rpl13
Rpl35a	1.27722e-15	0.505744	0.978	0.84	2.20933e-11	1	Rpl35a
Mns1	1.89277e-15	0.742654	0.298	0.07	3.27411e-11	1	Mns1
Ly6e	3.75807e-15	0.535445	0.961	0.871	6.50071e-11	1	Ly6e
Rps27a	1.24727e-14	0.464436	0.961	0.859	2.15753e-10	1	Rps27a
Gpr65	1.37483e-14	0.732287	0.448	0.171	2.37818e-10	1	Gpr65
Rps21	2.48927e-14	0.47864	0.972	0.856	4.30595e-10	1	Rps21
Cish	5.05478e-14	0.821947	0.552	0.253	8.74377e-10	1	Cish
Xlr4a	5.15274e-14	0.698395	0.331	0.099	8.91321e-10	1	Xlr4a
Rps18	5.68928e-14	0.560794	0.945	0.768	9.84131e-10	1	Rps18
Tspan32	8.1034e-14	0.546487	0.674	0.348	1.40173e-09	1	Tspan32
Rps9	1.77127e-13	0.511127	0.945	0.831	3.06395e-09	1	Rps9
Rpl7	3.83442e-13	0.51391	0.934	0.795	6.63277e-09	1	Rpl7
Gm2a	6.08145e-13	0.680886	0.464	0.19	1.05197e-08	1	Gm2a
Cnot6l	1.2571e-12	0.611406	0.569	0.289	2.17453e-08	1	Cnot6l
Rps26	1.51062e-12	0.502608	0.972	0.8	2.61307e-08	1	Rps26
Myo6	1.51458e-12	1.08669	0.293	0.089	2.61993e-08	1	Myo6
Glb1	1.86426e-12	0.648608	0.282	0.078	3.22479e-08	1	Glb1
St3gal6	2.6643e-12	0.702672	0.569	0.289	4.60871e-08	1	St3gal6
Rplp2	3.84696e-12	0.450669	0.989	0.831	6.65447e-08	1	Rplp2
4930523C07Rik	3.90342e-12	0.615863	0.586	0.325	6.75213e-08	1	4930523C07Rik
Rps6	4.46132e-12	0.539953	0.884	0.762	7.71719e-08	1	Rps6
Rpl36a	4.66327e-12	0.501502	0.923	0.779	8.06653e-08	1	Rpl36a
Rpl10a	7.38863e-12	0.46439	0.972	0.84	1.27808e-07	1	Rpl10a
Capg	9.79832e-12	0.427547	0.597	0.274	1.69491e-07	1	Capg
Id2	1.12069e-11	0.5351	0.928	0.652	1.93857e-07	1	Id2
Rps5	1.16138e-11	0.456964	0.961	0.819	2.00896e-07	1	Rps5
Rnaseh2c	1.24653e-11	0.725164	0.564	0.327	2.15625e-07	1	Rnaseh2c
Rps28	1.26115e-11	0.455196	0.945	0.812	2.18154e-07	1	Rps28
Rpl15	1.50529e-11	0.468296	0.939	0.795	2.60386e-07	1	Rpl15
Coro2a	1.63022e-11	0.416942	0.448	0.188	2.81995e-07	1	Coro2a
Tcrg-C4	1.6993e-11	0.746122	0.387	0.154	2.93945e-07	1	Tcrg-C4
Rps4x	2.07502e-11	0.438593	0.961	0.842	3.58937e-07	1	Rps4x
Dtnbp1	3.07059e-11	0.813973	0.337	0.127	5.31151e-07	1	Dtnbp1
Aff4	3.94373e-11	0.419595	0.436	0.183	6.82187e-07	1	Aff4
Rpl19	4.29239e-11	0.409624	0.934	0.848	7.42497e-07	1	Rpl19
Junb	7.01032e-11	0.865758	0.68	0.456	1.21264e-06	1	Junb
Rpl38	7.60199e-11	0.448536	0.961	0.84	1.31499e-06	1	Rpl38
Rpl28	1.03255e-10	0.458225	0.961	0.825	1.7861e-06	1	Rpl28
Ldha	1.10689e-10	0.584585	0.845	0.643	1.91469e-06	1	Ldha
Samsn1	1.75094e-10	0.6462	0.481	0.243	3.02877e-06	1	Samsn1
Gpx4	2.09497e-10	0.566324	0.807	0.58	3.62389e-06	1	Gpx4
Cox10	2.18349e-10	0.448288	0.254	0.074	3.777e-06	1	Cox10
Rps2	2.49881e-10	0.402064	0.972	0.84	4.32245e-06	1	Rps2
Ier2	2.57142e-10	0.723271	0.619	0.384	4.44804e-06	1	Ier2
Tcrg-C1	4.10981e-10	0.825885	0.304	0.106	7.10915e-06	1	Tcrg-C1
Rpl17	4.84414e-10	0.453678	0.967	0.821	8.37939e-06	1	Rpl17
Sec11c	4.99822e-10	0.63145	0.685	0.451	8.64591e-06	1	Sec11c
Ramp1	6.82925e-10	0.361244	0.613	0.314	1.18132e-05	1	Ramp1
Tusc3	7.20951e-10	0.574364	0.387	0.177	1.2471e-05	1	Tusc3
Rpl39	8.48784e-10	0.407309	0.961	0.812	1.46823e-05	1	Rpl39
Rps271	1.2603e-09	0.382732	0.956	0.846	2.18007e-05	1	Rps27
Ebpl	1.28974e-09	0.564645	0.343	0.141	2.23099e-05	1	Ebpl
Bmyc	1.45927e-09	0.536787	0.298	0.116	2.52424e-05	1	Bmyc
Rpl5	1.67167e-09	0.529025	0.873	0.751	2.89165e-05	1	Rpl5
Rps3	1.8566e-09	0.392783	0.972	0.842	3.21154e-05	1	Rps3
Faah	2.28939e-09	0.443975	0.414	0.186	3.96018e-05	1	Faah
Rbfa	2.94713e-09	0.433039	0.354	0.15	5.09795e-05	1	Rbfa
Kcnn4	3.22683e-09	0.478401	0.481	0.253	5.58178e-05	1	Kcnn4
Cd200r1	3.92997e-09	0.508479	0.271	0.091	6.79806e-05	1	Cd200r1
Tnfrsf25	4.10077e-09	0.448619	0.337	0.131	7.0935e-05	1	Tnfrsf25
Cfdp1	4.32689e-09	0.556899	0.431	0.222	7.48465e-05	1	Cfdp1
Ltb	4.48653e-09	0.522342	0.934	0.778	7.76081e-05	1	Ltb
Psap	4.71954e-09	0.423092	0.796	0.599	8.16386e-05	1	Psap
Rcn1	4.80505e-09	0.434298	0.276	0.099	8.31177e-05	1	Rcn1
Rpl36	4.84858e-09	0.385922	0.945	0.819	8.38707e-05	1	Rpl36
Plscr1	5.37923e-09	0.58592	0.265	0.095	9.305e-05	1	Plscr1
Skap1	5.49134e-09	0.486842	0.829	0.644	9.49891e-05	1	Skap1
Rpsa	5.54561e-09	0.35462	0.983	0.873	9.5928e-05	1	Rpsa
Ivns1abp	7.82868e-09	0.442551	0.337	0.143	0.00013542	1	Ivns1abp
Lamp1	7.83154e-09	0.494477	0.331	0.141	0.00013547	1	Lamp1
Nedd4	7.93376e-09	0.47296	0.436	0.219	0.000137238	1	Nedd4
Rpl32	8.04587e-09	0.381806	0.972	0.812	0.000139177	1	Rpl32
Rpl30	8.48656e-09	0.359842	0.967	0.852	0.000146801	1	Rpl30
Rtf1	1.02701e-08	0.633768	0.47	0.259	0.000177653	1	Rtf1
Eef1b2	1.18853e-08	0.465943	0.906	0.728	0.000205592	1	Eef1b2
Rpl14	1.19573e-08	0.424993	0.917	0.783	0.000206838	1	Rpl14
Ptpn9	1.89741e-08	0.479467	0.254	0.089	0.000328213	1	Ptpn9
Wls	1.95284e-08	0.420772	0.293	0.114	0.000337801	1	Wls
Rpl41	2.02265e-08	0.332623	0.967	0.871	0.000349879	1	Rpl41
Rpl27a	2.14189e-08	0.351065	0.945	0.842	0.000370504	1	Rpl27a
Spcs2	2.18365e-08	0.482281	0.702	0.517	0.000377727	1	Spcs2
Rps15	3.99675e-08	0.418801	0.917	0.757	0.000691357	1	Rps15
Tbca	4.20346e-08	0.532939	0.685	0.481	0.000727114	1	Tbca
Mdh1	5.1032e-08	0.537623	0.669	0.458	0.000882751	1	Mdh1
Sgf29	6.4225e-08	0.419817	0.348	0.165	0.00111096	1	Sgf29
Prdx6	6.67589e-08	0.416306	0.68	0.46	0.00115479	1	Prdx6
Il2rg	6.93758e-08	0.437619	0.917	0.743	0.00120006	1	Il2rg
Galnt12	7.31836e-08	0.292621	0.343	0.152	0.00126593	1	Galnt12
Rpl11	7.64025e-08	0.334659	0.945	0.844	0.00132161	1	Rpl11
Tnfrsf18	9.81697e-08	0.480904	0.602	0.388	0.00169814	1	Tnfrsf18
Rps11	1.08973e-07	0.345067	0.978	0.848	0.00188502	1	Rps11
Rpl22l1	1.09662e-07	0.534882	0.796	0.629	0.00189693	1	Rpl22l1
Rpl29	1.53707e-07	0.361613	0.945	0.793	0.00265882	1	Rpl29
Gnas	1.55505e-07	0.526094	0.674	0.485	0.00268993	1	Gnas
Atp5g2	2.15245e-07	0.429008	0.878	0.692	0.00372331	1	Atp5g2
Gnb2	2.30897e-07	0.442789	0.785	0.601	0.00399406	1	Gnb2
Chn2	2.56235e-07	0.299587	0.282	0.12	0.00443235	1	Chn2
Tpt1	3.42998e-07	0.345975	0.945	0.817	0.00593317	1	Tpt1
Ppp1r9b	5.18442e-07	0.519618	0.425	0.228	0.00896802	1	Ppp1r9b
Ppia	5.84125e-07	0.329852	0.967	0.84	0.0101042	1	Ppia
Eya2	6.33499e-07	0.298876	0.271	0.118	0.0109583	1	Eya2
Nfkbia	6.43505e-07	0.601567	0.597	0.394	0.0111313	1	Nfkbia
Gabarapl2	7.6497e-07	0.380911	0.735	0.58	0.0132325	1	Gabarapl2
Rpl18	8.60165e-07	0.320638	0.956	0.852	0.0148791	1	Rpl18
Selenok	1.02468e-06	0.473024	0.652	0.485	0.0177248	1	Selenok
Rps14	1.02947e-06	0.32699	0.934	0.831	0.0178078	1	Rps14
Tuba1b	1.2775e-06	0.49753	0.558	0.361	0.0220983	1	Tuba1b
Spint2	1.3163e-06	0.460687	0.431	0.26	0.0227693	1	Spint2
Pole4	1.52468e-06	0.518159	0.547	0.357	0.0263739	1	Pole4
CAAA01147332.1	1.6225e-06	0.588734	0.359	0.202	0.0280661	1	CAAA01147332.1
Samhd1	1.66258e-06	0.397505	0.663	0.483	0.0287593	1	Samhd1
Bhlhe40	2.07064e-06	0.470927	0.282	0.131	0.0358179	1	Bhlhe40
Mif4gd	2.67294e-06	0.358323	0.398	0.219	0.0462366	1	Mif4gd
Rpl12	2.6917e-06	0.341466	0.923	0.76	0.046561	1	Rpl12
M6pr	2.84929e-06	0.437217	0.541	0.356	0.049287	1	M6pr
Usp3	3.08462e-06	0.261212	0.343	0.177	0.0533578	1	Usp3
Rora	3.28556e-06	0.402897	0.42	0.238	0.0568336	1	Rora
Rexo2	3.34241e-06	0.463781	0.53	0.352	0.0578171	1	Rexo2
Ywhab	4.09662e-06	0.424764	0.691	0.542	0.0708633	1	Ywhab
Rpl18a	4.1492e-06	0.287406	0.978	0.842	0.0717729	1	Rpl18a
Adipor2	4.47345e-06	0.286139	0.293	0.143	0.0773817	1	Adipor2
Eef1a1	4.58126e-06	0.273515	0.983	0.914	0.0792467	1	Eef1a1
Alad	5.16961e-06	0.494307	0.254	0.12	0.089424	1	Alad
Swi5	5.84871e-06	0.461832	0.552	0.376	0.101171	1	Swi5
Rpl10	6.81593e-06	0.344509	0.95	0.804	0.117902	1	Rpl10
Rad50	6.9199e-06	0.551065	0.315	0.163	0.1197	1	Rad50
Mesd	1.04038e-05	0.432703	0.287	0.146	0.179964	1	Mesd
Rpl6	1.07706e-05	0.277101	0.945	0.831	0.18631	1	Rpl6
Pttg1ip	1.28663e-05	0.348922	0.309	0.162	0.222561	1	Pttg1ip
Emp3	1.34975e-05	0.394287	0.729	0.572	0.23348	1	Emp3
Rabac1	1.36609e-05	0.391688	0.718	0.589	0.236306	1	Rabac1
Cct4	1.3928e-05	0.398082	0.514	0.359	0.240927	1	Cct4
Rps6ka1	1.41802e-05	0.413967	0.436	0.272	0.245289	1	Rps6ka1
Selenof	1.60897e-05	0.408709	0.68	0.51	0.278319	1	Selenof
Pdha1	1.97627e-05	0.498742	0.359	0.219	0.341855	1	Pdha1
Mtdh	2.04999e-05	0.346786	0.536	0.371	0.354607	1	Mtdh
Fam104a	2.55576e-05	0.349595	0.475	0.306	0.442096	1	Fam104a
Socs1	2.75173e-05	0.542181	0.575	0.409	0.475994	1	Socs1
Limd2	2.87424e-05	0.346667	0.862	0.702	0.497186	1	Limd2
Ighm	3.1782e-05	0.282706	0.58	0.407	0.549765	1	Ighm
Eef1g	3.42767e-05	0.435316	0.669	0.529	0.592919	1	Eef1g
Icos	3.44206e-05	0.507282	0.381	0.222	0.595408	1	Icos
Rps16	3.46468e-05	0.273323	0.967	0.848	0.599321	1	Rps16
Eif1	4.04451e-05	0.273835	0.95	0.85	0.699619	1	Eif1
Cnbp	4.48696e-05	0.334402	0.79	0.66	0.776154	1	Cnbp
Eef1d	4.707e-05	0.342883	0.785	0.616	0.814217	1	Eef1d
Vars	4.86995e-05	0.271927	0.392	0.247	0.842404	1	Vars
Rpl3	5.2904e-05	0.285952	0.928	0.802	0.915134	1	Rpl3
Ssr4	5.47816e-05	0.332771	0.564	0.413	0.947612	1	Ssr4
Naca	5.87359e-05	0.278891	0.917	0.757	1	1	Naca
Csk	6.48955e-05	0.377976	0.619	0.445	1	1	Csk
Pebp1	6.64646e-05	0.361422	0.591	0.43	1	1	Pebp1
Ctsz	6.79925e-05	0.484812	0.293	0.171	1	1	Ctsz
Hnrnpa1	7.11492e-05	0.372209	0.525	0.361	1	1	Hnrnpa1
Slc25a3	7.54368e-05	0.36642	0.746	0.612	1	1	Slc25a3
Eif5a	7.87422e-05	0.277751	0.773	0.616	1	1	Eif5a
Fth1	8.00315e-05	0.306097	0.928	0.821	1	1	Fth1
Pink1	9.10408e-05	0.302089	0.387	0.236	1	1	Pink1
Atp5g1	9.10524e-05	0.32634	0.619	0.468	1	1	Atp5g1
Acp5	9.83747e-05	0.435354	0.431	0.291	1	1	Acp5
Rpl7a	9.84853e-05	0.303249	0.912	0.774	1	1	Rpl7a
Pigx	0.000101172	0.404194	0.37	0.232	1	1	Pigx
Serp1	0.000116579	0.396254	0.381	0.247	1	1	Serp1
BC005624	0.000120723	0.322919	0.376	0.241	1	1	BC005624
Stt3b	0.000132345	0.404119	0.265	0.143	1	1	Stt3b
Ppdpf	0.000151427	0.392736	0.459	0.325	1	1	Ppdpf
Lsm8	0.000154082	0.311711	0.354	0.224	1	1	Lsm8
Zbtb7a	0.000156622	0.30703	0.425	0.285	1	1	Zbtb7a
Trir	0.000160922	0.389792	0.486	0.359	1	1	Trir
Ppie	0.000161379	0.308428	0.287	0.162	1	1	Ppie
Sp3	0.000162952	0.265673	0.271	0.148	1	1	Sp3
Eif1b	0.000169721	0.425272	0.381	0.257	1	1	Eif1b
Tmem147	0.000180847	0.468714	0.265	0.152	1	1	Tmem147
Ptpn2	0.000201226	0.297745	0.343	0.209	1	1	Ptpn2
Rps17	0.000201886	0.284141	0.773	0.625	1	1	Rps17
Wdr83os	0.00021095	0.339637	0.514	0.371	1	1	Wdr83os
Uba52	0.00023011	0.325711	0.807	0.641	1	1	Uba52
Spcs3	0.00025424	0.313012	0.271	0.154	1	1	Spcs3
Hsp90aa1	0.000278383	0.39362	0.624	0.494	1	1	Hsp90aa1
Ywhaz	0.000283127	0.269716	0.845	0.705	1	1	Ywhaz
Eapp	0.000314421	0.302357	0.32	0.198	1	1	Eapp
Rps12	0.000339618	0.260045	0.934	0.785	1	1	Rps12
Polr2g	0.000357778	0.350362	0.32	0.202	1	1	Polr2g
Pdrg1	0.000370026	0.327709	0.348	0.221	1	1	Pdrg1
Iscu	0.000389157	0.391037	0.42	0.291	1	1	Iscu
Snrpd3	0.000407688	0.314472	0.591	0.466	1	1	Snrpd3
Rack1	0.000420742	0.280812	0.895	0.77	1	1	Rack1
Cdc42se2	0.000431333	0.45671	0.436	0.312	1	1	Cdc42se2
Cpne3	0.000451386	0.309534	0.271	0.154	1	1	Cpne3
Rpn2	0.000466111	0.29963	0.536	0.395	1	1	Rpn2
Cnpy2	0.000487568	0.535865	0.287	0.175	1	1	Cnpy2
Atp5o.1	0.000519735	0.283411	0.547	0.433	1	1	Atp5o.1
Eif3f1	0.000527824	0.272543	0.862	0.694	1	1	Eif3f
Uqcr11	0.000565343	0.328546	0.552	0.416	1	1	Uqcr11
Selenow	0.000601104	0.252076	0.812	0.652	1	1	Selenow
Eif4b	0.000613163	0.271257	0.486	0.35	1	1	Eif4b
Cox7a2	0.000621792	0.353511	0.641	0.508	1	1	Cox7a2
Ier5	0.000635206	0.31873	0.387	0.262	1	1	Ier5
Nr3c1	0.00066678	0.330588	0.42	0.289	1	1	Nr3c1
Sf3b4	0.000780577	0.381326	0.365	0.257	1	1	Sf3b4
Tnfaip8l2	0.000805848	0.28394	0.376	0.251	1	1	Tnfaip8l2
Polr2e	0.000810689	0.363141	0.425	0.312	1	1	Polr2e
Edf1	0.000879966	0.289156	0.724	0.595	1	1	Edf1
Laptm4a	0.000891517	0.317121	0.508	0.384	1	1	Laptm4a
Ndufa5	0.000917248	0.345032	0.464	0.35	1	1	Ndufa5
Slc25a4	0.000983136	0.386686	0.414	0.293	1	1	Slc25a4
Pla2g161	0.00100192	0.308786	0.486	0.371	1	1	Pla2g16
Trmt112	0.00113013	0.29902	0.696	0.565	1	1	Trmt112
Dap3	0.00124018	0.286415	0.265	0.162	1	1	Dap3
Sumo1	0.00124136	0.311767	0.575	0.454	1	1	Sumo1
Smdt1	0.00125368	0.312757	0.525	0.413	1	1	Smdt1
Chrac1	0.00126725	0.402265	0.315	0.213	1	1	Chrac1
Capza2	0.00130963	0.275962	0.481	0.357	1	1	Capza2
Klhl24	0.00131809	0.329433	0.254	0.158	1	1	Klhl24
Tomm5	0.00135799	0.362377	0.409	0.295	1	1	Tomm5
Rps25	0.00138545	0.288755	0.796	0.643	1	1	Rps25
Mrpl33	0.00149131	0.31515	0.536	0.416	1	1	Mrpl33
Ddb1	0.00153261	0.364016	0.282	0.181	1	1	Ddb1
Smim11	0.00153604	0.308439	0.354	0.247	1	1	Smim11
Cetn2	0.00157791	0.347763	0.32	0.213	1	1	Cetn2
1810022K09Rik	0.00161597	0.279853	0.414	0.297	1	1	1810022K09Rik
Emc4	0.00164055	0.304074	0.254	0.162	1	1	Emc4
Txnl1	0.00168043	0.286426	0.365	0.251	1	1	Txnl1
Tmem258	0.00173546	0.295955	0.63	0.506	1	1	Tmem258
Ddit4	0.00180642	0.351129	0.365	0.266	1	1	Ddit4
Gtf2h5	0.00201089	0.345112	0.354	0.247	1	1	Gtf2h5
Abhd16a	0.00206978	0.253983	0.276	0.171	1	1	Abhd16a
Dnaja1	0.00213754	0.2815	0.74	0.631	1	1	Dnaja1
Impdh2	0.00213769	0.37103	0.331	0.23	1	1	Impdh2
Gm16286	0.00218155	0.375062	0.392	0.291	1	1	Gm16286
Cmtm6	0.00225709	0.433983	0.276	0.184	1	1	Cmtm6
Batf	0.0022867	0.319488	0.254	0.162	1	1	Batf
Hk1	0.0023981	0.300436	0.287	0.186	1	1	Hk1
Klk8	0.00274568	0.282208	0.387	0.276	1	1	Klk8
Lsm12	0.00277862	0.310189	0.309	0.207	1	1	Lsm12
Nop10	0.00284083	0.313516	0.635	0.523	1	1	Nop10
Churc1	0.00305768	0.31902	0.414	0.314	1	1	Churc1
Htatsf1	0.0033721	0.316347	0.26	0.167	1	1	Htatsf1
Atp5f1	0.00339499	0.254861	0.657	0.529	1	1	Atp5f1
4933434E20Rik	0.00353415	0.269151	0.254	0.156	1	1	4933434E20Rik
Aes	0.00356487	0.300917	0.47	0.359	1	1	Aes
Nipbl	0.00381612	0.252667	0.514	0.405	1	1	Nipbl
Vapa	0.00397179	0.290033	0.431	0.331	1	1	Vapa
Gid8	0.00462497	0.289449	0.254	0.163	1	1	Gid8
Retreg2	0.00462969	0.284608	0.276	0.183	1	1	Retreg2
Qdpr	0.00483303	0.260045	0.304	0.205	1	1	Qdpr
Cmpk1	0.00492737	0.299255	0.309	0.215	1	1	Cmpk1
Ndufv1	0.00540872	0.324271	0.271	0.184	1	1	Ndufv1
Set	0.00606661	0.259126	0.492	0.386	1	1	Set
Clns1a	0.00609567	0.252986	0.26	0.177	1	1	Clns1a
Prdx5	0.00615449	0.262646	0.464	0.38	1	1	Prdx5
Spr	0.00664059	0.253925	0.265	0.179	1	1	Spr
Sfr1	0.00692357	0.330896	0.398	0.308	1	1	Sfr1
Tmed10	0.00749413	0.317811	0.42	0.329	1	1	Tmed10
Rbbp7	0.00785593	0.293916	0.42	0.331	1	1	Rbbp7
Ndufa3	0.00830868	0.261979	0.702	0.589	1	1	Ndufa3
Rnf7	0.00851651	0.298999	0.337	0.255	1	1	Rnf7
Ndufa6	0.00882	0.27066	0.619	0.504	1	1	Ndufa6
Fcer1g	1.62197e-75	3.57998	0.738	0.062	2.80569e-71	2	Fcer1g
Klrb1c	5.38647e-59	2.23238	0.623	0.05	9.31751e-55	2	Klrb1c
Cd7	3.65972e-57	3.12037	0.697	0.092	6.33058e-53	2	Cd7
Tyrobp	4.23086e-56	3.32363	0.557	0.041	7.31855e-52	2	Tyrobp
Xcl1	1.17484e-54	2.62413	0.844	0.169	2.03223e-50	2	Xcl1
Ncr1	9.28163e-53	2.13853	0.434	0.01	1.60554e-48	2	Ncr1
Klrd1	1.12946e-43	1.98603	0.721	0.14	1.95374e-39	2	Klrd1
Klrk1	2.09434e-41	1.77313	0.746	0.161	3.6228e-37	2	Klrk1
Klre1	3.29725e-40	1.41835	0.467	0.041	5.70359e-36	2	Klre1
Cd160	3.29926e-36	1.38264	0.5	0.063	5.70705e-32	2	Cd160
Nkg71	1.97295e-33	1.56165	0.869	0.316	3.41281e-29	2	Nkg7
Ctsw1	1.00345e-32	1.55942	0.885	0.342	1.73577e-28	2	Ctsw
Slamf7	1.48835e-32	1.25278	0.5	0.077	2.57454e-28	2	Slamf7
Cd244	2.60433e-32	0.890367	0.279	0.009	4.50496e-28	2	Cd244
Il2rb1	1.22412e-31	1.42535	0.902	0.378	2.11749e-27	2	Il2rb
Anxa2	1.19298e-30	1.44924	0.787	0.27	2.06362e-26	2	Anxa2
Klra7	3.86929e-28	1.57044	0.262	0.012	6.69309e-24	2	Klra7
Klrb1f	5.38245e-28	1.26598	0.303	0.022	9.31056e-24	2	Klrb1f
Efhd2	3.95539e-27	1.25782	0.713	0.224	6.84203e-23	2	Efhd2
Klrc1	3.07324e-26	1.56535	0.426	0.07	5.31609e-22	2	Klrc1
Klrc2	2.33853e-24	1.24774	0.287	0.026	4.0452e-20	2	Klrc2
Txk	2.80236e-24	0.900436	0.607	0.159	4.84753e-20	2	Txk
Samd3	1.24015e-23	0.891177	0.393	0.063	2.14521e-19	2	Samd3
Ccl51	1.53688e-23	0.853354	0.779	0.268	2.65849e-19	2	Ccl5
Gm19585	1.73156e-23	0.856857	0.5	0.106	2.99525e-19	2	Gm19585
Pglyrp11	1.4884e-22	1.23435	0.566	0.157	2.57464e-18	2	Pglyrp1
Gimap41	1.99836e-22	1.04689	0.869	0.379	3.45677e-18	2	Gimap4
Atp1b1	7.23771e-20	0.898682	0.336	0.056	1.25198e-15	2	Atp1b1
AC163354.1	3.13803e-19	1.00941	0.287	0.039	5.42817e-15	2	AC163354.1
Serpina3g	4.01801e-17	1.13124	0.451	0.126	6.95036e-13	2	Serpina3g
Ccr5	8.41116e-16	0.528026	0.369	0.084	1.45496e-11	2	Ccr5
Tmsb101	7.41974e-15	0.663281	0.951	0.908	1.28347e-10	2	Tmsb10
Evl	7.31427e-14	0.946066	0.705	0.364	1.26522e-09	2	Evl
Anxa1	9.78178e-14	1.10448	0.41	0.137	1.69205e-09	2	Anxa1
Cst7	1.41525e-13	0.623275	0.484	0.159	2.44809e-09	2	Cst7
AW1120101	6.0747e-13	0.870011	0.869	0.658	1.0508e-08	2	AW112010
Tbx211	8.79857e-13	0.571138	0.443	0.142	1.52198e-08	2	Tbx21
Rgs3	1.01338e-12	0.705366	0.434	0.144	1.75294e-08	2	Rgs3
Ms4a4b1	1.00963e-11	0.636885	0.902	0.462	1.74646e-07	2	Ms4a4b
Tnfrsf1a	2.66159e-11	0.507887	0.402	0.133	4.60401e-07	2	Tnfrsf1a
Hvcn1	3.30682e-11	0.599246	0.328	0.099	5.72013e-07	2	Hvcn1
Prf1	3.49619e-11	0.65677	0.262	0.065	6.04771e-07	2	Prf1
Ugcg	3.92384e-11	0.519719	0.303	0.082	6.78746e-07	2	Ugcg
Arsb	4.68655e-11	0.414549	0.32	0.091	8.1068e-07	2	Arsb
Fasl	6.48544e-11	0.508991	0.352	0.111	1.12185e-06	2	Fasl
Dennd4a	6.70475e-11	0.330361	0.377	0.12	1.15979e-06	2	Dennd4a
Stat4	1.10105e-10	0.629212	0.615	0.287	1.90459e-06	2	Stat4
Ppp3cc	1.17082e-10	0.507739	0.385	0.13	2.02529e-06	2	Ppp3cc
Rbpms	1.34816e-10	0.475438	0.254	0.062	2.33205e-06	2	Rbpms
Ptpn6	1.48117e-10	0.561605	0.492	0.198	2.56213e-06	2	Ptpn6
Cd9	2.97577e-10	0.474528	0.336	0.104	5.14749e-06	2	Cd9
Grina	3.38508e-10	0.682391	0.533	0.238	5.85552e-06	2	Grina
B4galnt1	3.93687e-10	0.813246	0.811	0.53	6.81e-06	2	B4galnt1
Lrmp	6.63074e-10	0.53218	0.369	0.128	1.14698e-05	2	Lrmp
Itm2a	6.65591e-10	0.512116	0.254	0.067	1.15134e-05	2	Itm2a
Lpcat4	7.46253e-10	0.419366	0.344	0.111	1.29087e-05	2	Lpcat4
Hopx1	8.02224e-10	0.523628	0.459	0.181	1.38769e-05	2	Hopx
Sytl3	1.16212e-09	0.442489	0.254	0.068	2.01023e-05	2	Sytl3
Myo1f	1.1777e-09	0.470005	0.402	0.15	2.03718e-05	2	Myo1f
Pbdc1	1.80797e-09	0.415561	0.303	0.092	3.12743e-05	2	Pbdc1
2021-09-11	2.05381e-09	0.672881	0.361	0.126	3.55268e-05	2	2021-09-11
Epsti11	4.75062e-09	0.613615	0.639	0.333	8.21762e-05	2	Epsti1
Zyx	5.09445e-09	0.652394	0.779	0.492	8.81238e-05	2	Zyx
Ifitm101	7.08621e-09	0.572469	0.426	0.178	0.000122577	2	Ifitm10
Lgals3bp	7.60438e-09	0.549048	0.467	0.2	0.000131541	2	Lgals3bp
Dusp21	9.78254e-09	0.757732	0.459	0.202	0.000169218	2	Dusp2
Ezr	1.87803e-08	0.422317	0.639	0.33	0.000324861	2	Ezr
Arpc1b1	2.90184e-08	0.457514	0.902	0.721	0.000501961	2	Arpc1b
Cd21	5.24592e-08	0.403043	0.705	0.371	0.000907439	2	Cd2
Adgre51	5.56515e-08	0.519831	0.721	0.412	0.00096266	2	Adgre5
Cd271	6.44706e-08	0.42114	0.541	0.256	0.00111521	2	Cd27
Npm3	6.8536e-08	0.554332	0.541	0.268	0.00118554	2	Npm3
Ly6c21	8.78458e-08	0.767404	0.484	0.236	0.00151956	2	Ly6c2
Pfn11	9.25661e-08	0.363891	0.91	0.877	0.00160121	2	Pfn1
Cd521	1.03877e-07	0.469282	0.893	0.841	0.00179686	2	Cd52
Gimap5	1.18573e-07	0.554782	0.631	0.361	0.00205107	2	Gimap5
Cxcr31	1.277e-07	0.409225	0.656	0.335	0.00220895	2	Cxcr3
Rasa1	1.39172e-07	0.266935	0.303	0.106	0.00240739	2	Rasa1
Bin1	1.3991e-07	0.618288	0.352	0.144	0.00242016	2	Bin1
Nhp2	1.40909e-07	0.488905	0.393	0.169	0.00243745	2	Nhp2
Hpcal1	1.54372e-07	0.330584	0.41	0.178	0.00267032	2	Hpcal1
Litaf	1.61393e-07	0.473569	0.279	0.097	0.00279178	2	Litaf
Il18rap	1.63026e-07	0.445455	0.336	0.135	0.00282002	2	Il18rap
Dnajc151	1.69323e-07	0.383689	0.59	0.306	0.00292896	2	Dnajc15
Nme1	1.85164e-07	0.300873	0.311	0.115	0.00320296	2	Nme1
Arpc3	2.02345e-07	0.528685	0.852	0.615	0.00350017	2	Arpc3
Phgdh	2.02794e-07	0.316498	0.377	0.156	0.00350794	2	Phgdh
Mvb12a	2.07975e-07	0.537728	0.426	0.193	0.00359755	2	Mvb12a
Snx5	2.31951e-07	0.40576	0.492	0.234	0.0040123	2	Snx5
Jpt11	2.79311e-07	0.416888	0.77	0.462	0.00483153	2	Jpt1
Ctsd	2.99289e-07	0.544041	0.861	0.626	0.00517709	2	Ctsd
Ipcef1	4.57314e-07	0.461347	0.287	0.109	0.00791062	2	Ipcef1
Icam1	1.91908e-06	0.427562	0.303	0.121	0.0331962	2	Icam1
Ywhaq	1.92523e-06	0.300947	0.402	0.178	0.0333026	2	Ywhaq
Zfp512	2.18642e-06	0.340441	0.27	0.106	0.0378207	2	Zfp512
Gimap61	2.46611e-06	0.520311	0.787	0.552	0.0426588	2	Gimap6
Nop101	2.70509e-06	0.48784	0.738	0.513	0.0467926	2	Nop10
Atraid	2.79792e-06	0.323614	0.303	0.125	0.0483984	2	Atraid
Snrpa1	2.88358e-06	0.283583	0.303	0.125	0.0498802	2	Snrpa1
Pabpc1	3.2639e-06	0.372237	0.91	0.822	0.056459	2	Pabpc1
Mrpl12	3.27777e-06	0.344581	0.377	0.169	0.0566989	2	Mrpl12
Slc25a5	3.43566e-06	0.534496	0.73	0.532	0.0594301	2	Slc25a5
Tmem256	3.54019e-06	0.31108	0.443	0.215	0.0612382	2	Tmem256
Fh1	3.68203e-06	0.321155	0.27	0.104	0.0636918	2	Fh1
Glrx3	5.51608e-06	0.332246	0.492	0.26	0.0954171	2	Glrx3
Psmc5	5.83539e-06	0.335971	0.41	0.198	0.100941	2	Psmc5
Eef1e1	6.04985e-06	0.267212	0.279	0.109	0.10465	2	Eef1e1
Peli1	7.06249e-06	0.35777	0.574	0.32	0.122167	2	Peli1
Golga7	7.75997e-06	0.35623	0.369	0.173	0.134232	2	Golga7
Clec2i1	8.71785e-06	0.334621	0.377	0.176	0.150801	2	Clec2i
Il4ra	9.42062e-06	0.347455	0.27	0.109	0.162958	2	Il4ra
Eif5a1	1.0052e-05	0.662984	0.795	0.627	0.173879	2	Eif5a
Tpi1	1.11773e-05	0.358344	0.385	0.191	0.193345	2	Tpi1
Mrps23	1.12888e-05	0.313145	0.393	0.193	0.195273	2	Mrps23
Fundc2	1.22792e-05	0.29414	0.418	0.198	0.212405	2	Fundc2
Phb2	1.23194e-05	0.4184	0.566	0.335	0.2131	2	Phb2
Hsd11b11	1.23337e-05	0.286978	0.385	0.185	0.213349	2	Hsd11b1
Snrpd1	1.33964e-05	0.416253	0.492	0.277	0.23173	2	Snrpd1
BC005537	1.38621e-05	0.34945	0.377	0.179	0.239786	2	BC005537
Ptpn221	1.50632e-05	0.31614	0.549	0.296	0.260564	2	Ptpn22
Minos1	1.57716e-05	0.351649	0.549	0.313	0.272817	2	Minos1
Fam162a	1.66379e-05	0.369776	0.393	0.191	0.287803	2	Fam162a
Higd1a1	1.78568e-05	0.339826	0.566	0.321	0.308887	2	Higd1a
Strap	1.9092e-05	0.429675	0.443	0.227	0.330253	2	Strap
Pgk1	2.56979e-05	0.487312	0.492	0.303	0.444523	2	Pgk1
Uqcrc2	2.59458e-05	0.363878	0.516	0.279	0.44881	2	Uqcrc2
Ywhae	2.68707e-05	0.367478	0.607	0.366	0.464809	2	Ywhae
Ddx47	3.08614e-05	0.281486	0.393	0.188	0.533841	2	Ddx47
Mrps36	3.2585e-05	0.421883	0.344	0.171	0.563655	2	Mrps36
Ahnak	3.30336e-05	0.257999	0.787	0.496	0.571415	2	Ahnak
Capzb1	3.35319e-05	0.361262	0.828	0.622	0.580035	2	Capzb
B3gnt2	3.51691e-05	0.271008	0.279	0.121	0.608354	2	B3gnt2
Ran	3.6236e-05	0.53496	0.746	0.55	0.62681	2	Ran
Adora2a	3.8109e-05	0.294672	0.279	0.123	0.659209	2	Adora2a
Hnrnpab	3.8334e-05	0.453466	0.516	0.318	0.663102	2	Hnrnpab
Uchl5	3.93272e-05	0.34223	0.254	0.109	0.680281	2	Uchl5
Apol7e	4.29323e-05	0.327141	0.262	0.115	0.742643	2	Apol7e
Mylip	4.57928e-05	0.505655	0.344	0.174	0.792123	2	Mylip
Slc25a39	4.76487e-05	0.252405	0.393	0.2	0.824227	2	Slc25a39
Pycard1	4.82048e-05	0.350341	0.467	0.258	0.833847	2	Pycard
Mef2a	4.95984e-05	0.276971	0.352	0.174	0.857954	2	Mef2a
Cycs	5.04217e-05	0.439282	0.574	0.374	0.872194	2	Cycs
Cnot8	5.90242e-05	0.252505	0.311	0.142	1	2	Cnot8
Zmat2	5.96378e-05	0.315966	0.385	0.197	1	2	Zmat2
Plp2	5.99721e-05	0.290876	0.418	0.226	1	2	Plp2
Acot7	6.5214e-05	0.365494	0.402	0.222	1	2	Acot7
Itgb11	6.98388e-05	0.254946	0.713	0.426	1	2	Itgb1
Ssr41	8.39019e-05	0.433035	0.648	0.41	1	2	Ssr4
Lta4h	8.68617e-05	0.386338	0.484	0.28	1	2	Lta4h
Rpl37	8.73705e-05	0.277822	0.91	0.855	1	2	Rpl37
Atp5e	8.76043e-05	0.340843	0.877	0.742	1	2	Atp5e
Atp5g3	9.16029e-05	0.373401	0.836	0.667	1	2	Atp5g3
Nptn	9.33094e-05	0.361098	0.361	0.185	1	2	Nptn
Ostf1	9.62683e-05	0.349031	0.59	0.362	1	2	Ostf1
Cblb	9.66578e-05	0.268569	0.352	0.178	1	2	Cblb
Ndufaf4	9.84599e-05	0.442817	0.287	0.135	1	2	Ndufaf4
Sephs2	9.86093e-05	0.289056	0.295	0.14	1	2	Sephs2
Sap18	0.000110166	0.285584	0.689	0.446	1	2	Sap18
Rwdd1	0.000111581	0.271993	0.508	0.287	1	2	Rwdd1
Mrpl17	0.000112218	0.354064	0.311	0.15	1	2	Mrpl17
Acp1	0.00011545	0.358954	0.303	0.152	1	2	Acp1
Sipa1	0.000121992	0.352869	0.508	0.299	1	2	Sipa1
Pgam1	0.000122214	0.357177	0.451	0.258	1	2	Pgam1
Ppm1g	0.00012576	0.297837	0.541	0.321	1	2	Ppm1g
Vsir1	0.000125971	0.254969	0.451	0.251	1	2	Vsir
Kdm5b	0.000126848	0.277176	0.303	0.144	1	2	Kdm5b
Eif3j1	0.000127948	0.287279	0.328	0.162	1	2	Eif3j1
Pomp	0.000132789	0.332941	0.607	0.393	1	2	Pomp
Nudt21	0.000133546	0.297733	0.434	0.246	1	2	Nudt21
Snrpa	0.000138072	0.307992	0.336	0.169	1	2	Snrpa
U2af2	0.000164376	0.270906	0.549	0.332	1	2	U2af2
Slbp	0.000189008	0.261368	0.418	0.232	1	2	Slbp
Actg11	0.000192997	0.305697	0.943	0.838	1	2	Actg1
Btf3	0.000193085	0.31079	0.869	0.706	1	2	Btf3
Eed	0.000195655	0.301241	0.328	0.164	1	2	Eed
Borcs8	0.000196782	0.274522	0.311	0.152	1	2	Borcs8
Abracl1	0.000197143	0.277102	0.566	0.356	1	2	Abracl
Nfatc11	0.000207768	0.309707	0.328	0.168	1	2	Nfatc1
Uqcr10	0.000213031	0.261008	0.639	0.427	1	2	Uqcr10
Reep5	0.000214848	0.346095	0.672	0.46	1	2	Reep5
Aggf1	0.00021982	0.307277	0.311	0.152	1	2	Aggf1
Txnrd1	0.000231082	0.318812	0.336	0.176	1	2	Txnrd1
Rbbp71	0.000232004	0.27177	0.533	0.316	1	2	Rbbp7
Polr2i	0.000246262	0.285408	0.328	0.164	1	2	Polr2i
Hnrnpa11	0.000256129	0.354138	0.566	0.369	1	2	Hnrnpa1
Lck1	0.00027301	0.270773	0.811	0.516	1	2	Lck
Sdcbp	0.000295732	0.333243	0.557	0.345	1	2	Sdcbp
Prpf19	0.000304251	0.369488	0.393	0.209	1	2	Prpf19
Cib1	0.000307275	0.300348	0.328	0.164	1	2	Cib1
Npm1	0.000333154	0.515811	0.779	0.696	1	2	Npm1
H2afz	0.000334077	0.33471	0.746	0.564	1	2	H2afz
Rpl101	0.000340814	0.294133	0.902	0.829	1	2	Rpl10
Bud31	0.000345132	0.318229	0.27	0.132	1	2	Bud31
Dkc1	0.000356412	0.304484	0.27	0.135	1	2	Dkc1
Mmgt2	0.00036234	0.41336	0.311	0.159	1	2	Mmgt2
Cuta	0.000386876	0.304222	0.533	0.338	1	2	Cuta
Mxd41	0.000422956	0.304742	0.426	0.241	1	2	Mxd4
Rpl23a	0.000431619	0.281422	0.82	0.682	1	2	Rpl23a
Nbeal2	0.000449597	0.325912	0.311	0.162	1	2	Nbeal2
Uqcrq	0.000450384	0.280226	0.623	0.419	1	2	Uqcrq
Llph	0.000474444	0.311321	0.557	0.354	1	2	Llph
Zmiz1	0.000496019	0.320908	0.344	0.185	1	2	Zmiz1
Cox5a	0.000500691	0.294465	0.754	0.55	1	2	Cox5a
Tmed9	0.000523321	0.25236	0.623	0.407	1	2	Tmed9
Supt16	0.000538408	0.317035	0.369	0.209	1	2	Supt16
Limd1	0.000555333	0.441645	0.262	0.128	1	2	Limd1
Pdia4	0.000574046	0.315457	0.467	0.284	1	2	Pdia4
Pqbp1	0.000578693	0.358808	0.262	0.13	1	2	Pqbp1
Bub3	0.000593648	0.257361	0.492	0.291	1	2	Bub3
Eif3a	0.000600954	0.271064	0.582	0.385	1	2	Eif3a
Rpl4	0.000630557	0.279986	0.869	0.716	1	2	Rpl4
Mapk1	0.000641721	0.317191	0.5	0.296	1	2	Mapk1
Serf2	0.000715514	0.26821	0.869	0.812	1	2	Serf2
Drg1	0.00076139	0.258708	0.344	0.188	1	2	Drg1
Hadhb	0.000773519	0.362445	0.41	0.246	1	2	Hadhb
Lsm4	0.000777888	0.353803	0.623	0.429	1	2	Lsm4
Tbcb	0.00083906	0.291936	0.393	0.219	1	2	Tbcb
1110008P14Rik1	0.000849877	0.252356	0.361	0.195	1	2	1110008P14Rik
Polr2f	0.000908831	0.286995	0.451	0.27	1	2	Polr2f
Eif4a1	0.00092827	0.363754	0.77	0.585	1	2	Eif4a1
Jund	0.000943959	0.36439	0.631	0.439	1	2	Jund
Rps22	0.000944313	0.307626	0.902	0.868	1	2	Rps2
Paics	0.00095936	0.334487	0.352	0.2	1	2	Paics
Pa2g4	0.000976545	0.395588	0.492	0.345	1	2	Pa2g4
Mrpl30	0.000977524	0.260238	0.525	0.338	1	2	Mrpl30
Rheb	0.000996694	0.37476	0.418	0.251	1	2	Rheb
Psme21	0.000997279	0.43861	0.779	0.617	1	2	Psme2
Eif1ax	0.000998412	0.428991	0.303	0.171	1	2	Eif1ax
Rps121	0.00101676	0.307516	0.893	0.809	1	2	Rps12
Arl2bp	0.00110637	0.312822	0.328	0.181	1	2	Arl2bp
Rpl151	0.00111537	0.260943	0.885	0.821	1	2	Rpl15
Abr	0.00115042	0.284629	0.262	0.138	1	2	Abr
Bcl2	0.00116382	0.350574	0.615	0.424	1	2	Bcl2
Slc25a31	0.00117034	0.277992	0.82	0.61	1	2	Slc25a3
Dusp5	0.00119038	0.258802	0.279	0.144	1	2	Dusp5
Rps171	0.00139103	0.344897	0.811	0.632	1	2	Rps17
Atp5a1	0.0014563	0.278934	0.713	0.568	1	2	Atp5a1
Maea	0.00146108	0.315134	0.328	0.186	1	2	Maea
Anp32e	0.00155357	0.293731	0.393	0.234	1	2	Anp32e
Dbnl	0.0015876	0.259765	0.516	0.321	1	2	Dbnl
Oxct1	0.00164383	0.362121	0.303	0.166	1	2	Oxct1
Vps29	0.00167617	0.252347	0.352	0.21	1	2	Vps29
Eif3b	0.00171548	0.386048	0.41	0.246	1	2	Eif3b
Cox8a	0.00172227	0.283556	0.877	0.757	1	2	Cox8a
Max	0.00173314	0.27704	0.393	0.226	1	2	Max
Exosc5	0.00178221	0.310622	0.328	0.188	1	2	Exosc5
Arl6ip5	0.00181425	0.378829	0.639	0.444	1	2	Arl6ip5
Mtch2	0.00181965	0.301239	0.385	0.227	1	2	Mtch2
Gspt1	0.00190902	0.398025	0.336	0.202	1	2	Gspt1
2021-09-07	0.00194534	0.358026	0.639	0.451	1	2	2021-09-07
Chd4	0.00197929	0.299164	0.623	0.426	1	2	Chd4
Acadvl	0.00221547	0.262346	0.27	0.142	1	2	Acadvl
Tomm20	0.0022539	0.250307	0.533	0.347	1	2	Tomm20
Sec61b	0.00226405	0.320763	0.754	0.607	1	2	Sec61b
Farsa	0.00228786	0.25173	0.254	0.133	1	2	Farsa
Ddx18	0.0023102	0.26165	0.41	0.239	1	2	Ddx18
Dbi	0.00234907	0.292162	0.385	0.239	1	2	Dbi
Psmd2	0.00238882	0.342622	0.459	0.289	1	2	Psmd2
Suclg1	0.00260806	0.27066	0.385	0.234	1	2	Suclg1
Eif3d	0.00268067	0.294477	0.443	0.289	1	2	Eif3d
Eif3h	0.00275387	0.292146	0.828	0.643	1	2	Eif3h
Txnl11	0.00292028	0.265277	0.41	0.253	1	2	Txnl1
Sfxn1	0.00298399	0.258073	0.279	0.154	1	2	Sfxn1
Ddx39	0.00300743	0.266955	0.385	0.227	1	2	Ddx39
U2af1	0.00333317	0.331425	0.475	0.323	1	2	U2af1
Psma4	0.00335148	0.25406	0.434	0.272	1	2	Psma4
Map2k2	0.00342852	0.348492	0.541	0.362	1	2	Map2k2
Srgn	0.00374828	0.447129	0.828	0.72	1	2	Srgn
Fbl	0.00436406	0.338336	0.475	0.342	1	2	Fbl
Zc3h13	0.00444537	0.259273	0.336	0.202	1	2	Zc3h13
Uqcc2	0.00502892	0.266587	0.467	0.313	1	2	Uqcc2
Mif	0.00512821	0.436189	0.631	0.538	1	2	Mif
Ptpre	0.00533396	0.317705	0.254	0.142	1	2	Ptpre
Cisd2	0.00546372	0.313293	0.32	0.19	1	2	Cisd2
Sumo2	0.00551639	0.252456	0.836	0.684	1	2	Sumo2
Eny2	0.00555674	0.250187	0.295	0.173	1	2	Eny2
Calm2	0.00574267	0.420279	0.672	0.549	1	2	Calm2
Ptma1	0.00586392	0.332531	0.885	0.834	1	2	Ptma
Ndufv11	0.00651159	0.28401	0.311	0.185	1	2	Ndufv1
Chmp1a	0.00664548	0.254391	0.336	0.209	1	2	Chmp1a
Nop58	0.00894514	0.385305	0.32	0.207	1	2	Nop58
Malat1	1.58028e-24	1.88686	0.977	0.994	2.73357e-20	3	Malat1
mt-Co1	8.73783e-12	0.792233	0.943	0.99	1.51147e-07	3	mt-Co1
mt-Atp6	2.47353e-11	0.768874	0.908	0.976	4.27871e-07	3	mt-Atp6
mt-Co3	2.73845e-11	0.803674	0.92	0.987	4.73697e-07	3	mt-Co3
mt-Cytb	3.33021e-11	0.750939	0.931	0.976	5.76059e-07	3	mt-Cytb
mt-Co2	4.73479e-11	0.659227	0.966	0.971	8.19023e-07	3	mt-Co2
Gm26917	1.06789e-10	1.9216	0.655	0.502	1.84723e-06	3	Gm26917
Rbm39	5.71828e-09	0.838223	0.759	0.869	9.89148e-05	3	Rbm39
Macf1	1.16478e-07	1.82312	0.552	0.447	0.00201484	3	Macf1
Hbb-bs	6.6268e-07	1.54631	0.598	0.526	0.011463	3	Hbb-bs
Gm42418	6.82633e-07	0.468779	1	1	0.0118082	3	Gm42418
Son	1.606e-06	1.19655	0.667	0.755	0.0277805	3	Son
Ptpn131	3.86134e-06	1.85012	0.276	0.123	0.0667935	3	Ptpn13
AC149090.1	4.41442e-06	1.8329	0.437	0.295	0.0763607	3	AC149090.1
Ptprc	5.74918e-06	1.31054	0.678	0.792	0.0994493	3	Ptprc
Arhgap45	2.0421e-05	1.00664	0.678	0.845	0.353243	3	Arhgap45
mt-Nd1	6.30692e-05	0.646583	0.736	0.876	1	3	mt-Nd1
AY036118	6.8283e-05	0.98055	0.172	0.466	1	3	AY036118
Tes	7.37591e-05	0.320573	0.138	0.424	1	3	Tes
Tapbp	0.00019636	0.288761	0.218	0.555	1	3	Tapbp
Fam49b	0.00029484	0.283746	0.138	0.395	1	3	Fam49b
Cst3	0.000329669	0.394285	0.195	0.5	1	3	Cst3
Srsf2	0.000397142	0.304412	0.126	0.365	1	3	Srsf2
Lman2	0.000432077	0.330704	0.126	0.368	1	3	Lman2
Lamtor1	0.000546618	0.459749	0.08	0.277	1	3	Lamtor1
Itm2c1	0.00059829	0.410179	0.241	0.571	1	3	Itm2c
Fmnl1	0.000640457	0.308247	0.207	0.513	1	3	Fmnl1
Smarce1	0.000686997	0.347937	0.08	0.273	1	3	Smarce1
Irf2	0.000766779	0.425178	0.149	0.398	1	3	Irf2
Sf3b2	0.000786639	0.265991	0.253	0.605	1	3	Sf3b2
Sec13	0.000865414	0.281372	0.092	0.289	1	3	Sec13
Aff41	0.000931558	1.57125	0.333	0.235	1	3	Aff4
Hspa4	0.00105808	0.468055	0.172	0.435	1	3	Hspa4
Tespa1	0.00108568	1.51206	0.471	0.468	1	3	Tespa1
mt-Nd2	0.00134188	0.644539	0.701	0.873	1	3	mt-Nd2
Pag1	0.00142056	1.751	0.276	0.176	1	3	Pag1
Mtch21	0.00148233	0.32718	0.092	0.277	1	3	Mtch2
Hcls1	0.00150124	0.323902	0.172	0.426	1	3	Hcls1
Brd2	0.00155473	0.4082	0.161	0.405	1	3	Brd2
2021-09-06	0.00167321	0.294986	0.161	0.402	1	3	2021-09-06
Mbnl1	0.00167331	1.3926	0.563	0.679	1	3	Mbnl1
Pdcd4	0.00190113	0.25405	0.161	0.4	1	3	Pdcd4
Dnajc7	0.00190239	0.307534	0.115	0.313	1	3	Dnajc7
Tnrc6b	0.00196147	1.42986	0.379	0.305	1	3	Tnrc6b
Tap2	0.00202252	0.402746	0.218	0.51	1	3	Tap2
Hnrnpc	0.00205195	0.354362	0.126	0.332	1	3	Hnrnpc
Wipf11	0.00207127	0.277419	0.172	0.419	1	3	Wipf1
Smc1a	0.00223177	0.423877	0.115	0.308	1	3	Smc1a
Clec2d	0.00233884	0.336089	0.264	0.582	1	3	Clec2d
mt-Nd4l	0.00234536	0.409088	0.77	0.942	1	3	mt-Nd4l
Sh3kbp11	0.00262647	0.273837	0.172	0.41	1	3	Sh3kbp1
Hnrnpdl	0.00269763	0.475736	0.138	0.35	1	3	Hnrnpdl
Srrm2	0.00271231	1.17974	0.575	0.769	1	3	Srrm2
Sf1	0.00278497	0.476711	0.172	0.415	1	3	Sf1
Tmem30a	0.00323436	0.274172	0.138	0.34	1	3	Tmem30a
Utrn	0.00335835	1.39222	0.356	0.29	1	3	Utrn
Tnfaip8	0.00340256	0.355514	0.161	0.385	1	3	Tnfaip8
Ubac2	0.00342674	0.297258	0.103	0.281	1	3	Ubac2
Tecpr1	0.0035169	0.262115	0.184	0.416	1	3	Tecpr1
Ddrgk1	0.00392101	0.336035	0.126	0.318	1	3	Ddrgk1
Hnrnpl	0.00456738	0.629393	0.184	0.424	1	3	Hnrnpl
Eif2s1	0.00463208	0.26475	0.115	0.294	1	3	Eif2s1
Pim1	0.00465569	0.553084	0.149	0.356	1	3	Pim1
Gps2	0.0048168	0.37505	0.149	0.355	1	3	Gps2
Top2b	0.0052417	0.355303	0.161	0.371	1	3	Top2b
Caprin1	0.00533238	0.566634	0.115	0.292	1	3	Caprin1
Inpp4b1	0.00561167	1.29233	0.506	0.552	1	3	Inpp4b
Gimap51	0.00582356	0.337143	0.195	0.437	1	3	Gimap5
Pdia3	0.00595598	0.363218	0.368	0.765	1	3	Pdia3
H2-Ke6	0.00595949	0.542121	0.161	0.369	1	3	H2-Ke6
Mif4gd1	0.00623119	0.391032	0.115	0.285	1	3	Mif4gd
Cyfip2	0.00644103	0.422569	0.172	0.39	1	3	Cyfip2
Cd164	0.0064817	0.337893	0.126	0.305	1	3	Cd164
Tram1	0.00664109	0.502053	0.184	0.411	1	3	Tram1
Esyt1	0.00668135	0.394518	0.253	0.535	1	3	Esyt1
Mat2a	0.00675415	0.318609	0.138	0.326	1	3	Mat2a
Srsf3	0.0068077	0.460194	0.253	0.55	1	3	Srsf3
Csde1	0.00688742	0.275157	0.115	0.284	1	3	Csde1
Kbtbd11	0.00698699	0.266521	0.103	0.263	1	3	Kbtbd11
Def6	0.00711583	0.498157	0.161	0.366	1	3	Def6
Dars	0.0071166	0.350091	0.103	0.265	1	3	Dars
Ptpn21	0.00720886	0.28656	0.103	0.263	1	3	Ptpn2
Il7r1	0.00729893	1.1749	0.529	0.573	1	3	Il7r
Ankrd10	0.00740405	0.285176	0.103	0.263	1	3	Ankrd10
Ccar1	0.00741449	0.463392	0.115	0.284	1	3	Ccar1
Skap11	0.00744866	0.35334	0.356	0.739	1	3	Skap1
Gatad2b	0.00791992	0.399417	0.126	0.3	1	3	Gatad2b
Rnf167	0.00794021	0.398141	0.184	0.408	1	3	Rnf167
Spn	0.00800607	0.317952	0.161	0.363	1	3	Spn
Hp1bp3	0.00830332	0.290295	0.207	0.444	1	3	Hp1bp3
Snw1	0.00872913	0.406495	0.126	0.3	1	3	Snw1
Rinl	0.00884679	1.26644	0.506	0.608	1	3	Rinl
BC0056241	0.00950311	0.341961	0.126	0.297	1	3	BC005624
Khdrbs1	0.00951552	0.357665	0.195	0.424	1	3	Khdrbs1
Rrbp1	0.00953868	0.3018	0.149	0.334	1	3	Rrbp1
Tbrg1	0.00953886	0.476783	0.161	0.36	1	3	Tbrg1
Tra2b	0.00956951	0.670856	0.218	0.471	1	3	Tra2b
Dcun1d5	0.00965013	0.2838	0.103	0.256	1	3	Dcun1d5
Rpn1	0.00994833	0.422973	0.149	0.337	1	3	Rpn1
Cd281	0.00995797	0.261943	0.115	0.273	1	3	Cd28
Cd163l1	3.13298e-87	3.64485	0.729	0.015	5.41942e-83	4	Cd163l1
Tcrg-V6	9.86405e-87	3.44407	0.593	0.002	1.70628e-82	4	Tcrg-V6
Blk	4.70598e-83	2.76589	0.661	0.011	8.1404e-79	4	Blk
Rorc	6.52785e-69	1.97246	0.525	0.006	1.12919e-64	4	Rorc
Kcnk1	1.57393e-68	1.80418	0.492	0.003	2.72259e-64	4	Kcnk1
Aqp3	3.42671e-68	1.9091	0.644	0.023	5.92752e-64	4	Aqp3
Actn2	2.26895e-65	2.22732	0.644	0.028	3.92483e-61	4	Actn2
Sox13	2.80544e-58	1.32928	0.407	0.002	4.85285e-54	4	Sox13
Serpinb1a	8.15816e-57	2.52416	0.729	0.06	1.4112e-52	4	Serpinb1a
Ly6g5b	1.46708e-54	2.01519	0.627	0.039	2.53775e-50	4	Ly6g5b
Il17re	2.21495e-53	1.39883	0.407	0.005	3.83143e-49	4	Il17re
Il23r	2.286e-51	1.6625	0.424	0.008	3.95432e-47	4	Il23r
Trdc	1.43937e-50	2.59374	0.661	0.052	2.48983e-46	4	Trdc
Jaml	1.71911e-45	2.15493	0.746	0.091	2.97371e-41	4	Jaml
Trdv4	3.87004e-44	4.41541	0.678	0.082	6.6944e-40	4	Trdv4
Ckb	1.6534e-43	2.82697	0.881	0.187	2.86005e-39	4	Ckb
Tns4	4.32117e-43	1.11486	0.322	0.003	7.47475e-39	4	Tns4
Il1r1	5.70215e-39	1.30329	0.322	0.006	9.86358e-35	4	Il1r1
Sdc1	1.64368e-38	1.29569	0.305	0.005	2.84324e-34	4	Sdc1
Ppp1r14c	2.00424e-38	1.0203	0.254	0	3.46694e-34	4	Ppp1r14c
Lrrc25	7.91495e-37	0.905316	0.356	0.012	1.36913e-32	4	Lrrc25
Igf1r	2.13412e-36	1.72139	0.492	0.037	3.6916e-32	4	Igf1r
Tmem176a	5.19233e-35	2.60574	0.864	0.238	8.98169e-31	4	Tmem176a
Tmem176b1	1.97733e-34	2.28271	0.949	0.289	3.42038e-30	4	Tmem176b
Selenop	7.07929e-32	2.34031	0.831	0.224	1.22458e-27	4	Selenop
Abi3bp	4.9221e-30	0.907079	0.271	0.008	8.51425e-26	4	Abi3bp
Tcrg-C11	6.0538e-30	2.11465	0.661	0.111	1.04719e-25	4	Tcrg-C1
Prelid2	8.60418e-28	1.22679	0.424	0.04	1.48835e-23	4	Prelid2
Ramp11	2.6367e-27	2.01566	0.898	0.344	4.56097e-23	4	Ramp1
S100a6	1.70019e-25	2.11924	0.949	0.573	2.94098e-21	4	S100a6
Capg1	3.12771e-25	2.05515	0.847	0.312	5.41031e-21	4	Capg
Smox	5.95322e-25	1.28989	0.39	0.039	1.02979e-20	4	Smox
Ramp3	1.50541e-24	0.993875	0.305	0.02	2.60406e-20	4	Ramp3
Ifngr1	1.57887e-24	1.98439	0.949	0.546	2.73112e-20	4	Ifngr1
Il18r1	1.59914e-23	1.71261	0.627	0.13	2.7662e-19	4	Il18r1
Rgcc	2.51406e-23	1.59003	0.559	0.105	4.34882e-19	4	Rgcc
S100a4	1.07423e-22	1.74538	0.847	0.321	1.85821e-18	4	S100a4
Avpi1	1.96162e-21	0.871604	0.305	0.026	3.39322e-17	4	Avpi1
Coro2b	2.81278e-21	0.834283	0.271	0.019	4.86555e-17	4	Coro2b
Nr1d1	5.2418e-21	1.01632	0.39	0.048	9.06726e-17	4	Nr1d1
Clnk	5.77099e-21	1.18353	0.39	0.048	9.98265e-17	4	Clnk
Krt83	9.18062e-21	1.23645	0.475	0.076	1.58806e-16	4	Krt83
Zbtb16	1.44633e-20	1.20315	0.356	0.04	2.50186e-16	4	Zbtb16
Gpx1	1.77131e-20	1.84005	0.881	0.503	3.06401e-16	4	Gpx1
Maf	9.82997e-20	1.7707	0.746	0.233	1.70039e-15	4	Maf
Dkkl1	2.0653e-19	0.904778	0.39	0.052	3.57256e-15	4	Dkkl1
Rnase4	9.37039e-19	0.878463	0.339	0.04	1.62089e-14	4	Rnase4
Pdcd1	1.98795e-17	1.89292	0.492	0.103	3.43876e-13	4	Pdcd1
Prrt1	2.06468e-17	1.14395	0.492	0.102	3.57148e-13	4	Prrt1
F2r	1.20415e-16	1.17054	0.492	0.11	2.08294e-12	4	F2r
Podnl1	6.47836e-16	1.24194	0.559	0.144	1.12063e-11	4	Podnl1
Plxnd1	1.06417e-15	0.869487	0.271	0.031	1.84079e-11	4	Plxnd1
S100a111	1.76585e-15	1.39981	0.864	0.647	3.05456e-11	4	S100a11
Cxcr6	3.16551e-15	1.26187	0.949	0.605	5.4757e-11	4	Cxcr6
Rln3	5.2251e-15	1.49048	0.356	0.062	9.03838e-11	4	Rln3
Bcl2a1b	1.62108e-14	1.1587	0.542	0.144	2.80415e-10	4	Bcl2a1b
Psap1	2.24363e-14	1.20149	0.932	0.623	3.88102e-10	4	Psap
Trgv2	3.19124e-14	1.35447	0.424	0.088	5.5202e-10	4	Trgv2
Cd3e1	3.41332e-14	1.19137	0.898	0.489	5.90436e-10	4	Cd3e
Osbpl3	7.63363e-14	1.12638	0.508	0.137	1.32047e-09	4	Osbpl3
Cd2471	4.78654e-13	1.3807	0.678	0.279	8.27976e-09	4	Cd247
Smco4	6.83762e-13	1.00308	0.525	0.159	1.18277e-08	4	Smco4
Cyp4f16	1.76058e-12	0.951868	0.305	0.052	3.04546e-08	4	Cyp4f16
Ero1l	5.15359e-12	0.868988	0.475	0.131	8.91468e-08	4	Ero1l
S100a101	2.09654e-11	0.889244	0.932	0.781	3.62659e-07	4	S100a10
Stk24	3.40565e-11	0.90767	0.712	0.33	5.8911e-07	4	Stk24
Itm2b1	3.54121e-11	0.71865	0.966	0.889	6.12559e-07	4	Itm2b
Parp1	4.92795e-11	1.00355	0.441	0.125	8.52437e-07	4	Parp1
Pxdc1	5.3502e-11	0.866424	0.322	0.068	9.25477e-07	4	Pxdc1
Gpr183	6.72934e-11	0.737297	0.576	0.198	1.16404e-06	4	Gpr183
Trpv2	1.42715e-10	0.913428	0.508	0.164	2.46869e-06	4	Trpv2
Lgals11	2.72485e-10	1.02923	0.814	0.468	4.71345e-06	4	Lgals1
Itgb7	2.85899e-10	0.793508	0.949	0.64	4.94547e-06	4	Itgb7
Cd3d1	4.90004e-10	0.938341	0.881	0.48	8.47609e-06	4	Cd3d
Il7r2	6.84667e-10	0.693684	0.966	0.531	1.18434e-05	4	Il7r
Il12rb1	1.85746e-09	1.04477	0.305	0.071	3.21304e-05	4	Il12rb1
Agtrap	2.08293e-09	0.815291	0.339	0.088	3.60306e-05	4	Agtrap
Tspo	2.23733e-09	0.828864	0.864	0.681	3.87013e-05	4	Tspo
Cd3g1	2.77182e-09	1.00049	0.831	0.506	4.79469e-05	4	Cd3g
Lipa	3.20381e-09	0.656531	0.373	0.105	5.54195e-05	4	Lipa
Ltb4r11	5.75642e-09	0.838316	0.61	0.238	9.95746e-05	4	Ltb4r1
Manf	6.69878e-09	1.02458	0.644	0.299	0.000115875	4	Manf
Gbp8	6.70769e-09	0.854621	0.441	0.142	0.00011603	4	Gbp8
Clic4	7.84018e-09	0.663429	0.288	0.068	0.000135619	4	Clic4
Ap3s1	1.00393e-08	0.975917	0.441	0.156	0.00017366	4	Ap3s1
Sdf2l1	1.09217e-08	1.08966	0.458	0.173	0.000188924	4	Sdf2l1
Plp21	1.14539e-08	1.04138	0.542	0.233	0.000198129	4	Plp2
Cry1	1.27564e-08	0.617877	0.254	0.056	0.000220659	4	Cry1
BC004004	2.15465e-08	0.779902	0.441	0.151	0.000372711	4	BC004004
Gstp1	2.92591e-08	1.12943	0.797	0.616	0.000506124	4	Gstp1
Impa1	3.23705e-08	0.702986	0.508	0.198	0.000559945	4	Impa1
Tax1bp1	3.4493e-08	0.74003	0.797	0.478	0.00059666	4	Tax1bp1
Zfp36l1	3.65064e-08	1.08326	0.831	0.534	0.000631487	4	Zfp36l1
Selplg	4.92911e-08	0.693163	0.915	0.761	0.000852638	4	Selplg
Sla	5.45865e-08	0.72336	0.661	0.313	0.000944238	4	Sla
Tmem109	6.06859e-08	0.576605	0.407	0.13	0.00104974	4	Tmem109
Lat1	9.58386e-08	0.83238	0.881	0.61	0.00165782	4	Lat
Nav2	1.11666e-07	0.708727	0.288	0.076	0.00193159	4	Nav2
Smyd2	1.2469e-07	0.593961	0.271	0.069	0.00215688	4	Smyd2
Wbp1	1.38144e-07	0.897997	0.458	0.182	0.00238961	4	Wbp1
Tbl1x	1.46618e-07	1.0175	0.441	0.167	0.0025362	4	Tbl1x
Clint1	1.542e-07	0.708167	0.525	0.219	0.00266735	4	Clint1
Tmem64	1.82347e-07	0.457001	0.339	0.099	0.00315424	4	Tmem64
Kif1b	1.94376e-07	0.635254	0.356	0.113	0.00336231	4	Kif1b
Rarg1	2.05729e-07	1.00197	0.458	0.182	0.00355869	4	Rarg
Nadk	3.40468e-07	0.821516	0.39	0.142	0.00588941	4	Nadk
Surf4	4.02585e-07	0.564193	0.475	0.193	0.00696391	4	Surf4
Ikzf3	4.5274e-07	0.840699	0.644	0.347	0.00783149	4	Ikzf3
Ccr21	4.98848e-07	0.714482	0.678	0.343	0.00862908	4	Ccr2
Ly6e1	9.22911e-07	0.555443	0.983	0.886	0.0159645	4	Ly6e
Snx14	1.252e-06	0.349616	0.254	0.066	0.0216572	4	Snx14
Laptm5	1.29298e-06	0.762137	0.932	0.844	0.0223659	4	Laptm5
Tmem59	1.61467e-06	0.554529	0.797	0.526	0.0279306	4	Tmem59
Lysmd2	1.89256e-06	0.57538	0.339	0.114	0.0327376	4	Lysmd2
Fxyd5	2.06922e-06	0.619483	0.898	0.802	0.0357934	4	Fxyd5
Comt	2.22133e-06	0.703518	0.339	0.122	0.0384246	4	Comt
Cep63	2.51842e-06	0.791395	0.271	0.083	0.0435636	4	Cep63
Vsir2	2.52859e-06	0.727627	0.525	0.264	0.0437396	4	Vsir
Mical1	2.64843e-06	0.605729	0.373	0.14	0.0458125	4	Mical1
Dap	2.65743e-06	0.717091	0.508	0.23	0.0459682	4	Dap
Abhd8	2.70513e-06	0.530342	0.627	0.323	0.0467934	4	Abhd8
2021-03-02	2.74943e-06	0.727108	0.39	0.142	0.0475596	4	2021-03-02
Camk4	2.76521e-06	0.336512	0.441	0.171	0.0478326	4	Camk4
Vim	3.14811e-06	0.697185	0.814	0.58	0.0544561	4	Vim
Anxa21	3.23082e-06	0.672249	0.644	0.333	0.0558867	4	Anxa2
Tagln2	3.30872e-06	0.687905	0.864	0.685	0.0572343	4	Tagln2
Tmem123	3.36976e-06	0.745539	0.475	0.221	0.0582902	4	Tmem123
Slc6a131	3.46326e-06	0.337418	0.339	0.11	0.0599075	4	Slc6a13
Plin3	3.58389e-06	0.439476	0.254	0.074	0.0619942	4	Plin3
Rexo21	3.91488e-06	0.686012	0.644	0.375	0.0677197	4	Rexo2
P4hb	4.06816e-06	0.536919	0.593	0.298	0.0703711	4	P4hb
1810058I24Rik	4.32428e-06	0.785498	0.576	0.312	0.0748014	4	1810058I24Rik
Cd82	4.34738e-06	0.811927	0.797	0.548	0.0752009	4	Cd82
Ppp1r14b	4.39499e-06	0.679666	0.271	0.086	0.0760246	4	Ppp1r14b
Fgl2	4.4451e-06	0.56445	0.678	0.361	0.0768913	4	Fgl2
Cst71	4.54525e-06	0.828899	0.441	0.194	0.0786237	4	Cst7
Tnfsf14	4.58111e-06	0.622359	0.373	0.14	0.0792441	4	Tnfsf14
Sat1	4.84784e-06	0.932148	0.576	0.295	0.0838579	4	Sat1
Tasp1	5.18663e-06	0.514686	0.424	0.177	0.0897184	4	Tasp1
Pkp3	5.22093e-06	0.871277	0.542	0.296	0.0903117	4	Pkp3
Abhd17a	5.55508e-06	0.482052	0.288	0.093	0.0960918	4	Abhd17a
Tmem154	6.23076e-06	0.770604	0.373	0.154	0.10778	4	Tmem154
Akirin1	6.3592e-06	0.526596	0.407	0.171	0.110001	4	Akirin1
Rtf2	6.60127e-06	0.767319	0.492	0.228	0.114189	4	Rtf2
Clic1	7.69298e-06	0.534648	0.881	0.773	0.133073	4	Clic1
Pgam11	7.75261e-06	0.830904	0.542	0.269	0.134105	4	Pgam1
Cers4	8.00612e-06	0.767951	0.508	0.25	0.13849	4	Cers4
Lsp11	8.09313e-06	0.63536	0.814	0.628	0.139995	4	Lsp1
Cd1641	1.10271e-05	0.706462	0.508	0.262	0.190747	4	Cd164
Tex264	1.11733e-05	0.59677	0.373	0.15	0.193275	4	Tex264
Mmd	1.147e-05	0.693472	0.271	0.091	0.198407	4	Mmd
Odc1	1.49695e-05	0.674981	0.339	0.131	0.258943	4	Odc1
Tuba4a	1.57448e-05	0.723447	0.508	0.258	0.272353	4	Tuba4a
Dctn1	2.28758e-05	0.720236	0.305	0.117	0.395705	4	Dctn1
Rora1	2.39974e-05	0.592905	0.525	0.262	0.415106	4	Rora
Diaph1	2.40809e-05	0.778045	0.542	0.302	0.416552	4	Diaph1
Rasgrp1	2.8959e-05	0.350649	0.559	0.292	0.500933	4	Rasgrp1
Xbp1	3.13591e-05	0.56035	0.458	0.222	0.542449	4	Xbp1
Tmbim6	3.31638e-05	0.49014	0.915	0.761	0.573667	4	Tmbim6
Bcl2a1d	3.35632e-05	0.451791	0.305	0.111	0.580577	4	Bcl2a1d
Rnf166	3.49325e-05	0.675242	0.525	0.299	0.604262	4	Rnf166
Vamp4	3.65424e-05	0.571596	0.441	0.211	0.63211	4	Vamp4
D10Jhu81e	4.37983e-05	0.623803	0.39	0.17	0.757623	4	D10Jhu81e
Arf5	4.65121e-05	0.525696	0.797	0.644	0.804567	4	Arf5
Sptssa1	4.67864e-05	0.715978	0.661	0.437	0.809311	4	Sptssa
Prr13	4.69606e-05	0.605166	0.746	0.559	0.812324	4	Prr13
Ucp21	4.7931e-05	0.619854	0.847	0.735	0.829111	4	Ucp2
Nfatc2	5.55103e-05	0.610207	0.305	0.117	0.960218	4	Nfatc2
Ftl1	5.82579e-05	0.473095	0.932	0.778	1	4	Ftl1
Abtb1	5.90079e-05	0.476328	0.271	0.099	1	4	Abtb1
Acat1	6.25565e-05	0.610417	0.441	0.216	1	4	Acat1
Fam129a	6.32551e-05	0.436751	0.508	0.256	1	4	Fam129a
Smpdl3a	7.30189e-05	0.593199	0.678	0.414	1	4	Smpdl3a
Cd96	7.40294e-05	0.789154	0.407	0.198	1	4	Cd96
Serpinb6a	7.69049e-05	0.358177	0.356	0.147	1	4	Serpinb6a
Cyth4	7.70353e-05	0.498476	0.61	0.353	1	4	Cyth4
Thy11	8.60405e-05	0.582077	0.847	0.725	1	4	Thy1
Lcp1	8.85496e-05	0.705194	0.966	0.781	1	4	Lcp1
Tnfaip81	9.63067e-05	0.498773	0.576	0.338	1	4	Tnfaip8
Mgat5	9.63369e-05	0.610177	0.373	0.168	1	4	Mgat5
Rabac11	9.769e-05	0.571905	0.814	0.605	1	4	Rabac1
Pdia41	0.00010051	0.90242	0.508	0.298	1	4	Pdia4
Crip11	0.000101868	0.559482	0.847	0.711	1	4	Crip1
Hspa5	0.000104546	1.4487	0.797	0.542	1	4	Hspa5
Pdia31	0.000107391	0.861391	0.847	0.704	1	4	Pdia3
Cdk2ap2	0.000110065	0.757058	0.695	0.512	1	4	Cdk2ap2
Rbl2	0.000112262	0.566314	0.542	0.299	1	4	Rbl2
Bsg	0.000115648	0.627986	0.678	0.435	1	4	Bsg
Cfl11	0.000126746	0.417262	0.932	0.818	1	4	Cfl1
Timm23	0.000131155	0.552597	0.492	0.279	1	4	Timm23
Slc35c2	0.000131518	0.495355	0.288	0.113	1	4	Slc35c2
Sit11	0.000136039	0.532565	0.305	0.127	1	4	Sit1
Cmtm61	0.000138217	0.574496	0.407	0.19	1	4	Cmtm6
Lax1	0.000144336	0.547946	0.424	0.207	1	4	Lax1
Il2ra1	0.000145274	0.411897	0.407	0.184	1	4	Il2ra
Riox2	0.000152893	0.342698	0.271	0.105	1	4	Riox2
Hsp90b1	0.00016927	1.18171	0.814	0.671	1	4	Hsp90b1
Nars	0.000174721	0.564253	0.458	0.231	1	4	Nars
Dnajc3	0.000179847	0.686083	0.712	0.458	1	4	Dnajc3
Fbxo6	0.000181863	0.512854	0.254	0.096	1	4	Fbxo6
Retreg21	0.00018432	0.483764	0.39	0.19	1	4	Retreg2
Cox6a1	0.000185982	0.47791	0.763	0.576	1	4	Cox6a1
Lypla2	0.000195688	0.452229	0.61	0.358	1	4	Lypla2
1500011K16Rik	0.00019602	0.462481	0.288	0.114	1	4	1500011K16Rik
Zap70	0.000197911	0.682205	0.644	0.418	1	4	Zap70
Nucb1	0.00020234	0.462372	0.475	0.244	1	4	Nucb1
Fkbp1a1	0.000215931	0.549701	0.661	0.432	1	4	Fkbp1a
Pdia6	0.000260425	1.06764	0.559	0.352	1	4	Pdia6
Fnbp1	0.000287776	0.384947	0.559	0.313	1	4	Fnbp1
Ostc	0.000293744	0.553107	0.576	0.347	1	4	Ostc
Tnfsf111	0.000317601	0.603586	0.356	0.165	1	4	Tnfsf11
Oaz1	0.000319257	0.434223	0.915	0.833	1	4	Oaz1
Ahnak1	0.000324767	0.383354	0.78	0.525	1	4	Ahnak
Rpn21	0.000327946	0.75821	0.61	0.415	1	4	Rpn2
Bri3bp	0.000334097	0.486969	0.271	0.114	1	4	Bri3bp
Ppp2r1a	0.000342796	0.592679	0.576	0.361	1	4	Ppp2r1a
Scp2	0.000344212	0.473506	0.644	0.418	1	4	Scp2
Piezo1	0.000362593	0.421694	0.271	0.11	1	4	Piezo1
Slc25a41	0.000374156	0.413273	0.542	0.304	1	4	Slc25a4
Trp53i13	0.000378679	0.483095	0.254	0.097	1	4	Trp53i13
Creb3	0.000382316	0.490484	0.288	0.122	1	4	Creb3
Ddost	0.000393502	0.390102	0.627	0.387	1	4	Ddost
St6galnac3	0.000397108	0.404236	0.373	0.168	1	4	St6galnac3
Ddx181	0.000437169	0.546491	0.458	0.252	1	4	Ddx18
Fam96a	0.000463939	0.569187	0.441	0.235	1	4	Fam96a
Mrps12	0.000497601	0.446583	0.39	0.198	1	4	Mrps12
St3gal61	0.000497952	0.374932	0.576	0.341	1	4	St3gal6
Bmyc1	0.000499475	0.412451	0.322	0.148	1	4	Bmyc
Ccdc107	0.000512016	0.377532	0.373	0.177	1	4	Ccdc107
Ubl3	0.000512828	0.463621	0.305	0.139	1	4	Ubl3
Tnfrsf251	0.000513541	0.383034	0.356	0.168	1	4	Tnfrsf25
Cox5a1	0.000541152	0.439928	0.78	0.568	1	4	Cox5a
Taf12	0.000562859	0.437734	0.305	0.14	1	4	Taf12
Sigirr	0.000597141	0.375302	0.288	0.122	1	4	Sigirr
Card19	0.000597771	0.545698	0.39	0.21	1	4	Card19
Galnt1	0.000629674	0.345123	0.339	0.156	1	4	Galnt1
Snx2	0.000652943	0.282563	0.39	0.191	1	4	Snx2
Sla2	0.000661423	0.323467	0.407	0.201	1	4	Sla2
Krtcap2	0.000665839	0.505483	0.729	0.549	1	4	Krtcap2
Arf6	0.000700545	0.545257	0.492	0.292	1	4	Arf6
Ddx21	0.00071602	0.441733	0.441	0.247	1	4	Ddx21
Galnt121	0.000749416	0.574824	0.373	0.185	1	4	Galnt12
Eif4e3	0.00075009	0.330349	0.288	0.125	1	4	Eif4e3
Anxa5	0.000764966	0.502158	0.508	0.313	1	4	Anxa5
Fis1	0.00079121	0.469147	0.729	0.515	1	4	Fis1
Bscl2	0.00082647	0.390189	0.39	0.202	1	4	Bscl2
Herpud1	0.00082704	0.700758	0.508	0.302	1	4	Herpud1
Ndufs5	0.000843836	0.482257	0.593	0.37	1	4	Ndufs5
Sec11c1	0.000857634	0.528177	0.712	0.492	1	4	Sec11c
Ndufs7	0.00085831	0.328021	0.593	0.364	1	4	Ndufs7
Prkx	0.000859908	0.565737	0.271	0.119	1	4	Prkx
Cnp1	0.000902166	0.426356	0.492	0.285	1	4	Cnp
Rnh1	0.000911301	0.647553	0.525	0.306	1	4	Rnh1
Crot	0.000917532	0.472723	0.356	0.179	1	4	Crot
Ppdpf1	0.000954207	0.379472	0.559	0.341	1	4	Ppdpf
Prdx61	0.000973755	0.766487	0.661	0.503	1	4	Prdx6
Ppt2	0.000983158	0.517619	0.271	0.128	1	4	Ppt2
Eif11	0.00102336	0.352763	0.966	0.867	1	4	Eif1
Uqcr111	0.00105761	0.441195	0.678	0.431	1	4	Uqcr11
Cdk4	0.00106009	0.439778	0.559	0.326	1	4	Cdk4
Psenen	0.00109768	0.486233	0.661	0.491	1	4	Psenen
Ptprcap	0.00112017	0.468904	0.898	0.767	1	4	Ptprcap
Camk2d	0.00112107	0.554619	0.39	0.204	1	4	Camk2d
Tnfrsf1a1	0.00115889	0.309799	0.339	0.165	1	4	Tnfrsf1a
Nfic	0.00120568	0.350854	0.271	0.119	1	4	Nfic
Park7	0.00125939	0.530893	0.678	0.549	1	4	Park7
Ngdn	0.00126982	0.324566	0.424	0.221	1	4	Ngdn
Npc21	0.00130017	0.417518	0.729	0.455	1	4	Npc2
Znrf1	0.00132	0.283163	0.356	0.174	1	4	Znrf1
Hspbp1	0.00133058	0.404581	0.322	0.159	1	4	Hspbp1
2021-03-02	0.00135781	0.472422	0.475	0.282	1	4	2021-03-02
Vdac1	0.00138312	0.351247	0.407	0.219	1	4	Vdac1
Ppp1ca	0.00144429	0.417921	0.814	0.647	1	4	Ppp1ca
Rab5b	0.00148659	0.282377	0.254	0.106	1	4	Rab5b
Cenpx	0.00154587	0.468205	0.492	0.282	1	4	Cenpx
Mospd3	0.00156881	0.486288	0.271	0.125	1	4	Mospd3
Cd44	0.0016389	0.683251	0.407	0.239	1	4	Cd44
Mpc1	0.00168703	0.519751	0.475	0.295	1	4	Mpc1
Rnf114	0.00177912	0.450596	0.407	0.231	1	4	Rnf114
Arl6ip11	0.00178285	0.372824	0.814	0.677	1	4	Arl6ip1
Aurkaip1	0.00180422	0.321947	0.559	0.338	1	4	Aurkaip1
Parl	0.00182319	0.615283	0.254	0.117	1	4	Parl
Lmnb1	0.00187517	0.433726	0.271	0.125	1	4	Lmnb1
Pkm	0.00197168	0.385416	0.797	0.668	1	4	Pkm
Pfkp	0.00206379	0.442489	0.339	0.182	1	4	Pfkp
Tmco1	0.0020777	0.778287	0.39	0.227	1	4	Tmco1
Ndufa4	0.00214223	0.410121	0.814	0.665	1	4	Ndufa4
Lsm7	0.00225852	0.501583	0.525	0.344	1	4	Lsm7
Slain2	0.002289	0.507461	0.254	0.12	1	4	Slain2
Pdrg11	0.00229871	0.444057	0.424	0.238	1	4	Pdrg1
Rpn11	0.00245102	0.50569	0.475	0.299	1	4	Rpn1
Hikeshi	0.00262653	0.416648	0.271	0.128	1	4	Hikeshi
Tmed3	0.00279216	0.388732	0.305	0.153	1	4	Tmed3
Atox1	0.00283357	0.407949	0.61	0.415	1	4	Atox1
Arl1	0.002866	0.46862	0.373	0.196	1	4	Arl1
Calr	0.00289794	0.732368	0.576	0.392	1	4	Calr
Tmem50a	0.00292699	0.422193	0.729	0.631	1	4	Tmem50a
2021-09-12	0.00293641	0.38029	0.831	0.715	1	4	2021-09-01
Ppib	0.00299114	0.354594	0.797	0.637	1	4	Ppib
Fam50a	0.00311658	0.396817	0.356	0.193	1	4	Fam50a
Bin11	0.00314368	0.328842	0.322	0.167	1	4	Bin1
Sesn1	0.00342237	0.484301	0.356	0.199	1	4	Sesn1
Wbp11	0.00347523	0.38495	0.373	0.21	1	4	Wbp11
Cyb5a	0.00348649	0.605458	0.475	0.323	1	4	Cyb5a
Pigt	0.00351422	0.410177	0.305	0.159	1	4	Pigt
Pycr2	0.00352801	0.454029	0.271	0.133	1	4	Pycr2
Susd3	0.00354475	0.283445	0.288	0.14	1	4	Susd3
R3hdm4	0.00363497	0.338696	0.441	0.253	1	4	R3hdm4
Pcmtd1	0.00364292	0.428002	0.373	0.202	1	4	Pcmtd1
AI467606	0.00369813	0.481611	0.593	0.386	1	4	AI467606
Arl6ip51	0.00376611	0.471741	0.627	0.465	1	4	Arl6ip5
Anapc13	0.003944	0.381544	0.339	0.187	1	4	Anapc13
Ap3d1	0.00409594	0.405302	0.305	0.157	1	4	Ap3d1
Spag7	0.00411586	0.353622	0.288	0.145	1	4	Spag7
Ndufa13	0.00414368	0.360493	0.797	0.636	1	4	Ndufa13
Fth11	0.00415225	0.305937	0.932	0.841	1	4	Fth1
Stub1	0.00427386	0.518568	0.508	0.306	1	4	Stub1
Fam102a	0.00428056	0.274649	0.525	0.324	1	4	Fam102a
Anxa11	0.0043491	0.45177	0.508	0.33	1	4	Anxa11
Jtb	0.00442819	0.403805	0.458	0.285	1	4	Jtb
Zpr1	0.00459539	0.308931	0.254	0.125	1	4	Zpr1
Serf21	0.00481076	0.287773	0.915	0.813	1	4	Serf2
Klf6	0.00503101	0.427754	0.508	0.336	1	4	Klf6
Atic	0.00508618	0.612026	0.339	0.199	1	4	Atic
Tcrg-C41	0.00513771	0.623165	0.356	0.201	1	4	Tcrg-C4
Txnrd11	0.00517477	0.37465	0.339	0.191	1	4	Txnrd1
Tspyl1	0.00528282	0.353065	0.322	0.168	1	4	Tspyl1
Rcbtb21	0.00530103	0.465857	0.39	0.222	1	4	Rcbtb2
Atp6v1h	0.00541245	0.568688	0.288	0.154	1	4	Atp6v1h
Echs1	0.00544737	0.350975	0.254	0.125	1	4	Echs1
Fkbp3	0.00556015	0.364102	0.644	0.458	1	4	Fkbp3
Sf3b6	0.00558472	0.485659	0.644	0.454	1	4	Sf3b6
Znhit1	0.00563564	0.343129	0.271	0.133	1	4	Znhit1
Rbck1	0.00569147	0.250885	0.458	0.275	1	4	Rbck1
Lmo41	0.00588177	0.60348	0.339	0.196	1	4	Lmo4
Fkbp2	0.0059948	0.399483	0.305	0.164	1	4	Fkbp2
Denr	0.00603649	0.443307	0.339	0.191	1	4	Denr
Ptpn61	0.00608862	0.609195	0.373	0.238	1	4	Ptpn6
Capns1	0.00611153	0.402139	0.678	0.469	1	4	Capns1
Rheb1	0.00613028	0.347487	0.424	0.267	1	4	Rheb
Blmh	0.00656061	0.291241	0.305	0.159	1	4	Blmh
Nek7	0.00664399	0.494298	0.322	0.185	1	4	Nek7
Spint21	0.0067547	0.341809	0.458	0.29	1	4	Spint2
Aup1	0.00682501	0.284034	0.678	0.471	1	4	Aup1
Tex261	0.00709001	0.413092	0.356	0.207	1	4	Tex261
Mrpl4	0.00717529	0.398842	0.441	0.276	1	4	Mrpl4
Eloa	0.0071819	0.295403	0.271	0.14	1	4	Eloa
Canx	0.00724523	0.888435	0.492	0.333	1	4	Canx
Cirbp	0.00725919	0.358643	0.441	0.273	1	4	Cirbp
Slc39a7	0.00727411	0.282239	0.305	0.165	1	4	Slc39a7
Ppil4	0.00746526	0.333253	0.305	0.16	1	4	Ppil4
Cited2	0.0075654	0.367449	0.373	0.225	1	4	Cited2
Mbnl2	0.00759745	0.277574	0.271	0.139	1	4	Mbnl2
Lsm2	0.00776344	0.324361	0.339	0.187	1	4	Lsm2
Pgk11	0.00781018	0.413372	0.475	0.323	1	4	Pgk1
Ech1	0.00785597	0.351747	0.525	0.34	1	4	Ech1
Nelfb	0.00790694	0.302892	0.407	0.248	1	4	Nelfb
Hexb	0.007999	0.294361	0.254	0.131	1	4	Hexb
Snx1	0.00809998	0.409412	0.373	0.222	1	4	Snx1
Tor1aip2	0.00859436	0.447784	0.254	0.137	1	4	Tor1aip2
Nme2	0.00862735	0.305408	0.576	0.4	1	4	Nme2
Rwdd11	0.00864888	0.492974	0.458	0.313	1	4	Rwdd1
Mppe1	0.00874035	0.691996	0.288	0.151	1	4	Mppe1
Elovl1	0.00892632	0.428614	0.288	0.16	1	4	Elovl1
Snrpd2	0.00898452	0.346433	0.559	0.398	1	4	Snrpd2
Ilk	0.00900522	0.401829	0.424	0.258	1	4	Ilk
Ythdf2	0.00908369	0.465091	0.356	0.224	1	4	Ythdf2
Tmem160	0.00918319	0.41234	0.458	0.302	1	4	Tmem160
CAAA01147332.11	0.00919677	0.309698	0.39	0.228	1	4	CAAA01147332.1
Kbtbd111	0.00927617	0.511545	0.39	0.23	1	4	Kbtbd11
Apol7e1	0.00936623	0.31816	0.254	0.13	1	4	Apol7e
Gemin7	0.0098582	0.304867	0.373	0.218	1	4	Gemin7
