# Supplementary material for: The meningeal transcriptional response to traumatic brain injury and aging
Source: eLife. 2023 Jan 3;12:e81154. doi: 10.7554/eLife.81154 (PMC9810333; doi:10.7554/eLife.81154)
Supplement: Figure 4—source data 3. — Tables depicting the top 10 most significant cluster-defining genes for B cell populations. Raw data for top cluster defining genes for each cell population. [file elife-81154-fig4-data3.xlsx]

## Sheet: Sheet1
	p_val	avg_log2FC	pct.1	pct.2	p_val_adj	cluster	gene
Ms4a1	2.63161e-89	1.77473	0.989	0.586	4.55215e-85	0	Ms4a1		Gene	P_adj		Gene	P_adj		Gene	P_adj		Gene	P_adj
Ly6d	1.23816e-51	1.12549	0.976	0.861	2.14177e-47	0	Ly6d		Ms4a1	4.55e-85		H2-Aa	6.73e-85		Rag1	7.91e-81		Ccnd2	3.11e-31
Tmsb4x	3.00798e-46	0.736436	0.973	0.915	5.20321e-42	0	Tmsb4x		Ly6d	2.14e-47		H2-Eb1	4.71e-84		Xrcc6	1.88e-80		Srm	4.07e-29
Cd79a	5.64479e-46	0.655414	0.992	0.969	9.76436e-42	0	Cd79a		Tmsb4x	5.2e-42		Rps24	1.96e-71		Smarca4	2.09e-71		Mettl1	2e-27
Pld4	1.84904e-42	1.42032	0.676	0.24	3.19847e-38	0	Pld4		Cd79a	9.76e-42		H2-Ab1	2.82e-67		Atp1b1	2.64e-71		Myc	2.83e-21
Cd79b	2.4895e-42	0.622388	0.989	0.963	4.30634e-38	0	Cd79b		Pld4	3.2e-38		Rps27	5.73e-62		Tifa	2.3e-70		Apex1	3.94e-21
Hck	1.55401e-41	1.3632	0.692	0.251	2.68812e-37	0	Hck		Cd79b	4.31e-38		Shisa5	6.17e-62		Dnajc7	1.39e-65		Wnt10a	4.34e-19
Iglc1	3.13086e-40	1.3807	0.77	0.346	5.41576e-36	0	Iglc1		Hck	2.69e-37		Rps21	9.44e-62		Arl5c	1.69e-65		Nop16	5.69e-19
Crip1	3.66996e-36	1.35789	0.876	0.638	6.34829e-32	0	Crip1		Iglc1	5.42e-36		Sell	1.99e-60		Il7r	1.14e-64		Grwd1	1.38e-18
Ptpn6	3.39003e-34	0.966462	0.886	0.573	5.86408e-30	0	Ptpn6		Crip1	6.35e-32		Gimap3	3.4e-57		Rag2	9.65e-53		Bcl3	3.79e-18
Cd37	3.09453e-33	0.577222	0.989	0.948	5.35292e-29	0	Cd37		Ptpn6	5.86e-30		Gimap4	4.33e-55		Fam53b	3.2e-51		Mrto4	3.33e-17
Pfn1	7.07564e-32	0.650607	0.965	0.896	1.22394e-27	0	Pfn1		*Each graph depicts top 10 cluster-defining genes
Cd24a	4.25707e-31	0.916492	0.914	0.607	7.36388e-27	0	Cd24a
Tnfrsf13c	5.04629e-31	0.98766	0.841	0.526	8.72907e-27	0	Tnfrsf13c
Ucp2	4.57055e-28	0.740241	0.943	0.764	7.90613e-24	0	Ucp2
Ighm	3.57485e-27	0.691682	0.986	0.952	6.18377e-23	0	Ighm
Spib	3.57731e-24	0.788331	0.859	0.607	6.18802e-20	0	Spib
Rnase6	6.13315e-24	0.977081	0.67	0.35	1.06091e-19	0	Rnase6
Gga2	1.11626e-23	0.938792	0.641	0.34	1.93091e-19	0	Gga2
Napsa	3.88615e-23	0.729081	0.892	0.66	6.72225e-19	0	Napsa
Dusp10	4.71506e-22	1.00208	0.319	0.068	8.1561e-18	0	Dusp10
Actb	1.91896e-21	0.429389	0.995	0.963	3.31941e-17	0	Actb
Fgd2	3.0763e-20	1.01261	0.416	0.149	5.32138e-16	0	Fgd2
Serpinb1a	1.29587e-19	0.875556	0.603	0.306	2.2416e-15	0	Serpinb1a
Ehd4	4.30401e-19	0.950595	0.43	0.157	7.44508e-15	0	Ehd4
Cfl1	1.41005e-18	0.485902	0.959	0.87	2.43911e-14	0	Cfl1
H3f3a	1.677e-18	0.403428	0.976	0.93	2.90087e-14	0	H3f3a
Hvcn1	4.78428e-18	0.71841	0.722	0.441	8.27584e-14	0	Hvcn1
Lynx1	6.38667e-18	0.889661	0.43	0.164	1.10477e-13	0	Lynx1
Txndc5	1.02156e-17	0.887453	0.581	0.308	1.7671e-13	0	Txndc5
Siglecg	1.50732e-17	0.618649	0.886	0.708	2.60736e-13	0	Siglecg
Tnfrsf13b	2.86129e-17	0.762342	0.657	0.406	4.94946e-13	0	Tnfrsf13b
Gnai2	4.48421e-17	0.771853	0.73	0.518	7.75678e-13	0	Gnai2
Ctsz	5.11224e-17	0.771882	0.692	0.449	8.84316e-13	0	Ctsz
Rac2	6.97023e-17	0.500112	0.941	0.834	1.20571e-12	0	Rac2
Cfp	9.52463e-17	0.926389	0.349	0.11	1.64757e-12	0	Cfp
Pold4	2.00679e-16	0.672052	0.754	0.513	3.47135e-12	0	Pold4
Cd52	2.25431e-16	0.577113	0.938	0.785	3.8995e-12	0	Cd52
Treml2	4.5135e-16	0.703223	0.451	0.193	7.80745e-12	0	Treml2
Sdc4	1.05871e-15	0.725305	0.581	0.323	1.83135e-11	0	Sdc4
Lsp1	1.25198e-15	0.623663	0.892	0.768	2.16568e-11	0	Lsp1
Atp2a3	1.7538e-15	0.724888	0.527	0.277	3.03373e-11	0	Atp2a3
Irf8	1.87716e-15	0.626396	0.732	0.484	3.24712e-11	0	Irf8
Acp5	1.91003e-15	0.814949	0.524	0.288	3.30397e-11	0	Acp5
Myl12b	7.52232e-15	0.533598	0.881	0.714	1.30121e-10	0	Myl12b
Nedd4	8.31054e-15	0.746097	0.343	0.124	1.43756e-10	0	Nedd4
Vim	9.67738e-15	0.701118	0.73	0.487	1.67399e-10	0	Vim
Plac8	1.01213e-14	0.820507	0.578	0.317	1.75079e-10	0	Plac8
Srpk3	1.11314e-14	0.77537	0.441	0.201	1.9255e-10	0	Srpk3
Map4k1	1.45246e-14	0.724273	0.586	0.35	2.51246e-10	0	Map4k1
Arpc5l	1.61993e-14	0.627172	0.773	0.588	2.80215e-10	0	Arpc5l
Cyba	2.01499e-14	0.499634	0.903	0.723	3.48552e-10	0	Cyba
Cyth4	2.13576e-14	0.674511	0.37	0.141	3.69443e-10	0	Cyth4
Msn	4.90836e-14	0.59677	0.803	0.634	8.49049e-10	0	Msn
Cnn3	5.07457e-14	0.644648	0.559	0.313	8.77799e-10	0	Cnn3
Mcl1	8.91163e-14	0.638766	0.568	0.319	1.54153e-09	0	Mcl1
4930426D05Rik	1.36767e-13	0.656361	0.381	0.155	2.36579e-09	0	4930426D05Rik
Lyn	1.49118e-13	0.566359	0.781	0.576	2.57944e-09	0	Lyn
Btg1	1.50914e-13	0.488434	0.922	0.764	2.61052e-09	0	Btg1
Pou2f2	2.24872e-13	0.637944	0.692	0.439	3.88984e-09	0	Pou2f2
Them6	6.55307e-13	0.752771	0.389	0.174	1.13355e-08	0	Them6
Scd1	9.42049e-13	0.782963	0.492	0.275	1.62956e-08	0	Scd1
Pdlim2	1.00227e-12	0.658226	0.308	0.114	1.73373e-08	0	Pdlim2
Cib1	2.1462e-12	0.584356	0.632	0.42	3.71249e-08	0	Cib1
Lyl1	3.04523e-12	0.662191	0.432	0.219	5.26763e-08	0	Lyl1
Irf5	6.29527e-12	0.644495	0.516	0.3	1.08896e-07	0	Irf5
Ncf4	1.1701e-11	0.604179	0.595	0.383	2.02404e-07	0	Ncf4
Prr5	1.19834e-11	0.569962	0.346	0.147	2.07288e-07	0	Prr5
Ly6e	1.5711e-11	0.322184	0.986	0.961	2.71769e-07	0	Ly6e
Emid1	1.78287e-11	0.743304	0.297	0.116	3.08401e-07	0	Emid1
Dusp2	2.68555e-11	0.782428	0.597	0.412	4.64546e-07	0	Dusp2
Pmf1	3.03938e-11	0.632547	0.419	0.211	5.25752e-07	0	Pmf1
Vpreb3	3.27191e-11	0.29819	0.927	0.658	5.65974e-07	0	Vpreb3
Abi3	4.32406e-11	0.685428	0.422	0.219	7.47976e-07	0	Abi3
Hcls1	4.43839e-11	0.577817	0.619	0.4	7.67753e-07	0	Hcls1
Cd180	4.5106e-11	0.566431	0.438	0.23	7.80243e-07	0	Cd180
Rasgrp1	4.56316e-11	0.612191	0.365	0.172	7.89335e-07	0	Rasgrp1
Cd72	5.64638e-11	0.64788	0.768	0.596	9.76711e-07	0	Cd72
Samd9l	6.24444e-11	0.512924	0.376	0.176	1.08016e-06	0	Samd9l
Klf2	6.55764e-11	0.43669	0.862	0.756	1.13434e-06	0	Klf2
Igkc	7.55087e-11	0.653797	0.873	0.768	1.30615e-06	0	Igkc
Capzb	1.23347e-10	0.499707	0.757	0.586	2.13365e-06	0	Capzb
Actg1	1.91169e-10	0.42604	0.949	0.855	3.30684e-06	0	Actg1
Fermt3	1.9171e-10	0.539165	0.551	0.337	3.31619e-06	0	Fermt3
Cd53	2.65217e-10	0.505591	0.684	0.489	4.58773e-06	0	Cd53
Ywhaz	4.60577e-10	0.425895	0.862	0.772	7.96707e-06	0	Ywhaz
Fam3c	5.4232e-10	0.514241	0.392	0.197	9.38105e-06	0	Fam3c
Cyb561a3	7.24849e-10	0.527344	0.584	0.391	1.25384e-05	0	Cyb561a3
Atp6v0e	9.11825e-10	0.463718	0.665	0.478	1.57728e-05	0	Atp6v0e
Rogdi	2.31971e-09	0.493466	0.278	0.116	4.01264e-05	0	Rogdi
Ddx58	2.60338e-09	0.483685	0.316	0.147	4.50334e-05	0	Ddx58
Bcl11a	2.64475e-09	0.440096	0.543	0.34	4.57489e-05	0	Bcl11a
Gnas	2.7617e-09	0.482808	0.657	0.472	4.77719e-05	0	Gnas
Card11	3.53766e-09	0.552478	0.362	0.186	6.11945e-05	0	Card11
Coro1a	4.95811e-09	0.302641	0.949	0.892	8.57653e-05	0	Coro1a
Tgfb1	9.25163e-09	0.490298	0.638	0.447	0.000160035	0	Tgfb1
Nrm	9.51427e-09	0.492957	0.508	0.308	0.000164578	0	Nrm
Oaz1	1.13768e-08	0.276788	0.957	0.87	0.000196797	0	Oaz1
Unc93b1	1.22925e-08	0.358654	0.878	0.778	0.000212636	0	Unc93b1
Capg	1.32875e-08	0.423479	0.605	0.395	0.000229847	0	Capg
Arpc2	1.64229e-08	0.38994	0.846	0.729	0.000284083	0	Arpc2
Lat2	2.37222e-08	0.504263	0.327	0.161	0.000410347	0	Lat2
Arhgap30	2.71044e-08	0.447197	0.597	0.404	0.000468852	0	Arhgap30
Man2b1	4.8607e-08	0.417658	0.481	0.311	0.000840804	0	Man2b1
2021-09-01	5.64789e-08	0.419446	0.649	0.493	0.000976971	0	2021-09-01
Gngt2	6.24591e-08	0.551354	0.373	0.213	0.00108042	0	Gngt2
Sp140	6.87781e-08	0.600017	0.441	0.282	0.00118972	0	Sp140
Fcgr2b	7.60643e-08	0.359641	0.341	0.172	0.00131576	0	Fcgr2b
Cd74	7.6777e-08	0.322357	0.997	0.851	0.00132809	0	Cd74
Stx7	1.03074e-07	0.422995	0.441	0.263	0.00178298	0	Stx7
Hspa5	1.08673e-07	0.538245	0.632	0.455	0.00187982	0	Hspa5
Sorl1	1.31636e-07	0.4484	0.359	0.19	0.00227705	0	Sorl1
Rassf4	1.52632e-07	0.665782	0.278	0.139	0.00264022	0	Rassf4
Rasgrp2	1.8364e-07	0.424901	0.581	0.395	0.00317661	0	Rasgrp2
Iglc3	1.95538e-07	0.408491	0.846	0.7	0.00338241	0	Iglc3
Kctd12	2.01486e-07	0.473472	0.327	0.18	0.0034853	0	Kctd12
Pkib	2.10941e-07	0.418092	0.292	0.143	0.00364886	0	Pkib
Myo1g	2.16605e-07	0.487348	0.441	0.277	0.00374684	0	Myo1g
Psmb8	2.71648e-07	0.351737	0.778	0.627	0.00469896	0	Psmb8
Plcg2	3.60419e-07	0.49529	0.519	0.354	0.00623453	0	Plcg2
Vav1	4.10153e-07	0.485409	0.443	0.277	0.00709483	0	Vav1
Gm42031	4.41608e-07	0.271402	0.784	0.631	0.00763893	0	Gm42031
Ptprc	4.42484e-07	0.330664	0.735	0.582	0.00765409	0	Ptprc
Sema4d	4.5433e-07	0.379993	0.295	0.151	0.00785899	0	Sema4d
Heatr6	6.80941e-07	0.468387	0.362	0.215	0.0117789	0	Heatr6
Ptprcap	7.32159e-07	0.282542	0.908	0.805	0.0126649	0	Ptprcap
Stat1	7.40973e-07	0.373924	0.384	0.222	0.0128173	0	Stat1
Tmem123	8.79284e-07	0.449431	0.584	0.433	0.0152098	0	Tmem123
Ly86	9.07105e-07	0.326062	0.722	0.553	0.0156911	0	Ly86
Sp100	9.31661e-07	0.433501	0.689	0.538	0.0161159	0	Sp100
Susd3	9.57742e-07	0.376826	0.395	0.236	0.016567	0	Susd3
Pten	1.02116e-06	0.470379	0.384	0.23	0.0176641	0	Pten
Dbnl	1.03297e-06	0.322421	0.649	0.466	0.0178682	0	Dbnl
Ppp1ca	1.03375e-06	0.365416	0.841	0.729	0.0178819	0	Ppp1ca
Mtpn	1.08351e-06	0.360845	0.508	0.346	0.0187425	0	Mtpn
Tbc1d10c	1.14435e-06	0.315246	0.527	0.358	0.019795	0	Tbc1d10c
Wipf1	1.23335e-06	0.529155	0.341	0.203	0.0213345	0	Wipf1
Id3	1.28973e-06	0.584476	0.489	0.331	0.0223097	0	Id3
Reep5	1.41604e-06	0.3514	0.578	0.431	0.0244946	0	Reep5
Prdx5	1.46621e-06	0.433488	0.53	0.375	0.0253625	0	Prdx5
Jakmip1	1.73955e-06	0.452246	0.343	0.203	0.0300908	0	Jakmip1
Ifi27l2a	1.74065e-06	0.70572	0.603	0.491	0.0301098	0	Ifi27l2a
Ppm1m	1.83402e-06	0.434288	0.257	0.13	0.0317249	0	Ppm1m
B3gnt5	2.04388e-06	0.371048	0.359	0.211	0.0353551	0	B3gnt5
Ccnd2	2.06176e-06	0.349663	0.254	0.12	0.0356643	0	Ccnd2
Jarid2	2.91546e-06	0.404488	0.284	0.151	0.0504317	0	Jarid2
Cuta	3.01388e-06	0.466602	0.378	0.238	0.052134	0	Cuta
Ikzf3	3.28676e-06	0.278425	0.762	0.642	0.0568544	0	Ikzf3
Plgrkt	3.40185e-06	0.43507	0.343	0.209	0.0588452	0	Plgrkt
AI467606	3.64936e-06	0.40228	0.454	0.298	0.0631266	0	AI467606
Plp2	3.8474e-06	0.500232	0.359	0.224	0.0665524	0	Plp2
Csk	4.36478e-06	0.402766	0.722	0.58	0.0755019	0	Csk
Pml	4.5536e-06	0.465455	0.397	0.255	0.0787682	0	Pml
Cnn2	4.57998e-06	0.342658	0.659	0.489	0.0792245	0	Cnn2
Ogfr	6.40801e-06	0.428244	0.257	0.137	0.110846	0	Ogfr
Hsp90b1	6.72433e-06	0.3217	0.781	0.677	0.116318	0	Hsp90b1
Tcof1	7.26901e-06	0.404927	0.381	0.242	0.125739	0	Tcof1
Pold1	9.37293e-06	0.39055	0.346	0.205	0.162133	0	Pold1
Psmb9	9.86954e-06	0.360216	0.5	0.344	0.170723	0	Psmb9
Serf2	1.01887e-05	0.313983	0.889	0.81	0.176244	0	Serf2
Smdt1	1.11015e-05	0.338934	0.586	0.418	0.192034	0	Smdt1
Iglc2	1.21863e-05	0.550211	0.697	0.613	0.210798	0	Iglc2
Slc25a4	1.25627e-05	0.462828	0.368	0.24	0.217309	0	Slc25a4
Nfu1	1.28398e-05	0.422008	0.284	0.164	0.222103	0	Nfu1
Scand1	1.35858e-05	0.263654	0.651	0.516	0.235007	0	Scand1
Ndufa13	1.47781e-05	0.324587	0.659	0.545	0.255631	0	Ndufa13
Map4k2	1.54506e-05	0.384573	0.365	0.234	0.267265	0	Map4k2
Mlec	1.63688e-05	0.377301	0.268	0.151	0.283147	0	Mlec
Sh3bgrl3	1.66961e-05	0.254635	0.911	0.805	0.288809	0	Sh3bgrl3
Fam43a	1.68616e-05	0.435333	0.289	0.168	0.291671	0	Fam43a
Selenow	1.82689e-05	0.261407	0.819	0.696	0.316016	0	Selenow
Rchy1	1.88969e-05	0.280535	0.457	0.311	0.326878	0	Rchy1
Psap	2.15587e-05	0.269594	0.824	0.702	0.372923	0	Psap
Cd22	2.26913e-05	0.37723	0.451	0.308	0.392515	0	Cd22
Gpsm3	2.29646e-05	0.323675	0.486	0.34	0.397241	0	Gpsm3
Samhd1	2.47606e-05	0.327731	0.622	0.497	0.42831	0	Samhd1
Taok3	2.51135e-05	0.397717	0.365	0.234	0.434413	0	Taok3
Psmb10	2.53795e-05	0.419181	0.516	0.375	0.439015	0	Psmb10
Arhgap4	2.56651e-05	0.322826	0.403	0.267	0.443955	0	Arhgap4
Ncf1	2.98635e-05	0.266389	0.422	0.273	0.516578	0	Ncf1
Iglv3	3.22015e-05	1.60964	0.262	0.157	0.557022	0	Iglv3
Flna	3.35659e-05	0.313533	0.384	0.255	0.580623	0	Flna
Ostf1	3.35688e-05	0.264762	0.565	0.424	0.580673	0	Ostf1
Snx2	3.44093e-05	0.280013	0.705	0.582	0.595212	0	Snx2
Arpc1b	3.6964e-05	0.281286	0.838	0.741	0.639403	0	Arpc1b
Itpr3	3.7791e-05	0.502532	0.262	0.153	0.653709	0	Itpr3
Cnpy3	3.88576e-05	0.285898	0.265	0.151	0.672159	0	Cnpy3
1110008P14Rik	3.91012e-05	0.35053	0.335	0.209	0.676373	0	1110008P14Rik
Ifi47	3.9511e-05	0.434357	0.297	0.186	0.683461	0	Ifi47
Calr	4.97836e-05	0.373825	0.492	0.36	0.861157	0	Calr
Trp53i11	5.0244e-05	0.345305	0.414	0.288	0.86912	0	Trp53i11
Snap29	5.17352e-05	0.300386	0.384	0.251	0.894916	0	Snap29
Ctsb	5.2421e-05	0.320982	0.435	0.302	0.906779	0	Ctsb
A630001G21Rik	5.65702e-05	0.449081	0.308	0.199	0.978552	0	A630001G21Rik
Rubcn	6.14567e-05	0.351538	0.33	0.211	1	0	Rubcn
Smim20	6.427e-05	0.409504	0.335	0.222	1	0	Smim20
Fam49b	6.85547e-05	0.316317	0.554	0.433	1	0	Fam49b
Grk6	7.91731e-05	0.301063	0.346	0.219	1	0	Grk6
Hhex	7.9185e-05	0.441817	0.3	0.193	1	0	Hhex
Nol7	8.43513e-05	0.311805	0.662	0.538	1	0	Nol7
Map3k1	8.6757e-05	0.362151	0.303	0.19	1	0	Map3k1
Ostc	9.45319e-05	0.330171	0.405	0.282	1	0	Ostc
Tsc22d3	0.000108102	0.315095	0.578	0.458	1	0	Tsc22d3
Tmem160	0.000109668	0.270524	0.322	0.203	1	0	Tmem160
9930111J21Rik2	0.000118205	0.326682	0.319	0.207	1	0	9930111J21Rik2
Cdk2ap2	0.000134536	0.378033	0.576	0.47	1	0	Cdk2ap2
Lrp10	0.000135806	0.332498	0.441	0.333	1	0	Lrp10
Tnfaip8	0.000137384	0.426185	0.462	0.335	1	0	Tnfaip8
Dennd5b	0.000137404	0.336109	0.259	0.155	1	0	Dennd5b
Spi1	0.000144085	0.306039	0.524	0.398	1	0	Spi1
Cotl1	0.000146559	0.405587	0.416	0.292	1	0	Cotl1
Parvg	0.000147678	0.410878	0.308	0.207	1	0	Parvg
Purb	0.000148491	0.270285	0.254	0.147	1	0	Purb
Tmem14c	0.000151737	0.344944	0.451	0.323	1	0	Tmem14c
Acd	0.000165426	0.262143	0.262	0.157	1	0	Acd
Bst2	0.000168335	0.315439	0.297	0.186	1	0	Bst2
Tfeb	0.00017313	0.414867	0.284	0.182	1	0	Tfeb
Lbh	0.000180919	0.324727	0.465	0.344	1	0	Lbh
Limd2	0.000182125	0.289844	0.851	0.766	1	0	Limd2
Hmgn1	0.000186119	0.322996	0.659	0.528	1	0	Hmgn1
Sla	0.000191833	0.514959	0.343	0.251	1	0	Sla
Erp29	0.000207535	0.255634	0.711	0.605	1	0	Erp29
Sh2b3	0.000219375	0.280094	0.257	0.155	1	0	Sh2b3
St3gal1	0.000259715	0.358536	0.276	0.174	1	0	St3gal1
Was	0.000267865	0.283907	0.411	0.292	1	0	Was
Psenen	0.000298389	0.26424	0.57	0.455	1	0	Psenen
Rab24	0.000309445	0.323916	0.319	0.207	1	0	Rab24
Sp110	0.000377304	0.360123	0.338	0.23	1	0	Sp110
Vasp	0.000401965	0.332308	0.378	0.269	1	0	Vasp
Gm30211	0.000410494	0.492495	0.541	0.472	1	0	Gm30211
B3gnt8	0.00043202	0.341061	0.373	0.255	1	0	B3gnt8
Ifi35	0.000437282	0.319894	0.292	0.19	1	0	Ifi35
Mdh1	0.000457457	0.36971	0.573	0.48	1	0	Mdh1
Rhof	0.000502194	0.33686	0.251	0.157	1	0	Rhof
Ptp4a3	0.000509829	0.269801	0.63	0.505	1	0	Ptp4a3
Ncf2	0.000518748	0.330211	0.359	0.251	1	0	Ncf2
Bcap31	0.000586676	0.272223	0.438	0.329	1	0	Bcap31
Prorsd1	0.000625261	0.309691	0.278	0.18	1	0	Prorsd1
Rap1b	0.000625816	0.343872	0.381	0.277	1	0	Rap1b
Polr2j	0.000635298	0.400411	0.341	0.251	1	0	Polr2j
Ptp4a2	0.000835646	0.350577	0.443	0.342	1	0	Ptp4a2
Myo1c	0.000869288	0.266933	0.427	0.323	1	0	Myo1c
Myl12a	0.000880455	0.253	0.678	0.559	1	0	Myl12a
Pqbp1	0.0010005	0.344606	0.346	0.246	1	0	Pqbp1
Atox1	0.00102607	0.27253	0.508	0.387	1	0	Atox1
Manf	0.00123149	0.320631	0.384	0.275	1	0	Manf
Tap2	0.00124919	0.281491	0.349	0.248	1	0	Tap2
Copz1	0.00126578	0.310875	0.327	0.238	1	0	Copz1
Snapc5	0.00128787	0.315714	0.273	0.184	1	0	Snapc5
Hip1r	0.00129782	0.391579	0.259	0.172	1	0	Hip1r
Bin1	0.00138312	0.27647	0.465	0.36	1	0	Bin1
Gm2a	0.00143481	0.34167	0.376	0.284	1	0	Gm2a
Gimap9	0.00148715	0.300743	0.327	0.228	1	0	Gimap9
S100a11	0.00149999	0.300131	0.641	0.565	1	0	S100a11
Stk10	0.00159	0.359508	0.303	0.215	1	0	Stk10
Scp2	0.00164073	0.288985	0.416	0.311	1	0	Scp2
Osbpl9	0.00187975	0.26973	0.357	0.248	1	0	Osbpl9
Nedd8	0.0021762	0.274475	0.632	0.538	1	0	Nedd8
Sec13	0.00269684	0.257129	0.389	0.286	1	0	Sec13
Cd40	0.00313698	0.370708	0.33	0.242	1	0	Cd40
Selenoh	0.00334979	0.288512	0.314	0.23	1	0	Selenoh
Minos1	0.00371702	0.264151	0.376	0.286	1	0	Minos1
Wdr1	0.00423103	0.29971	0.519	0.433	1	0	Wdr1
Sdf4	0.00452402	0.288937	0.365	0.275	1	0	Sdf4
Nedd9	0.00453832	0.26557	0.338	0.257	1	0	Nedd9
Dmxl1	0.0052412	0.311431	0.284	0.201	1	0	Dmxl1
Aldh2	0.0052852	0.255069	0.57	0.505	1	0	Aldh2
Anxa6	0.00531942	0.287688	0.386	0.302	1	0	Anxa6
Cdkn2d	0.00558432	0.279818	0.319	0.236	1	0	Cdkn2d
Tmem208	0.00583952	0.301317	0.262	0.193	1	0	Tmem208
Trim12c	0.00752256	0.276617	0.276	0.201	1	0	Trim12c
Srp9	0.00808864	0.253436	0.484	0.418	1	0	Srp9
Tnfaip8l2	0.00822427	0.265365	0.286	0.207	1	0	Tnfaip8l2
Sdhaf2	0.00907942	0.29148	0.259	0.193	1	0	Sdhaf2
Stxbp2	0.00913969	0.412508	0.273	0.205	1	0	Stxbp2
Slc50a1	0.00932795	0.25835	0.443	0.36	1	0	Slc50a1
Ppp3ca	0.00942184	0.280187	0.397	0.325	1	0	Ppp3ca
Lsm7	0.00991413	0.278887	0.368	0.28	1	0	Lsm7
H2-Aa	3.88881e-89	2.48066	0.981	0.527	6.72687e-85	1	H2-Aa
H2-Eb1	2.72234e-88	2.28855	0.981	0.473	4.7091e-84	1	H2-Eb1
Rps24	1.13198e-75	1.17413	0.991	0.925	1.9581e-71	1	Rps24
H2-Ab1	1.63025e-71	1.84589	0.976	0.559	2.82001e-67	1	H2-Ab1
Rps27	3.31366e-66	1.19421	0.981	0.917	5.73197e-62	1	Rps27
Shisa5	3.56514e-66	1.87267	0.91	0.388	6.16697e-62	1	Shisa5
Rps21	5.45953e-66	1.13622	0.976	0.905	9.44389e-62	1	Rps21
Sell	1.15191e-64	1.86436	0.651	0.092	1.99257e-60	1	Sell
Gimap3	1.96346e-61	1.6875	0.519	0.041	3.3964e-57	1	Gimap3
Gimap4	2.50202e-59	1.60689	0.439	0.019	4.328e-55	1	Gimap4
Rpsa	4.00319e-59	1.02725	0.976	0.927	6.92471e-55	1	Rpsa
Rpl13	8.2742e-57	0.890628	0.986	0.934	1.43127e-52	1	Rpl13
Rpl21	2.18767e-49	0.827423	0.976	0.919	3.78423e-45	1	Rpl21
Rps16	5.72203e-49	0.755702	0.981	0.939	9.89797e-45	1	Rps16
Rpl18a	1.1942e-48	0.836795	0.995	0.925	2.06573e-44	1	Rpl18a
Fau	2.28914e-48	0.70567	0.976	0.958	3.95975e-44	1	Fau
Rps20	2.15185e-47	0.843986	0.976	0.927	3.72228e-43	1	Rps20
Rps15a	5.85931e-47	0.86298	0.976	0.919	1.01354e-42	1	Rps15a
Pglyrp1	1.58582e-46	1.39153	0.363	0.019	2.74315e-42	1	Pglyrp1
Fcer2a	1.91649e-46	1.54428	0.642	0.144	3.31514e-42	1	Fcer2a
Rps29	9.75613e-46	0.951282	0.976	0.897	1.68762e-41	1	Rps29
Ly6a	3.09748e-45	2.06682	0.462	0.059	5.35802e-41	1	Ly6a
Rpl30	5.78699e-44	0.786711	0.981	0.93	1.00103e-39	1	Rpl30
Gimap6	2.29339e-43	1.44849	0.792	0.345	3.96711e-39	1	Gimap6
Cd741	1.66402e-42	1.02158	0.995	0.888	2.87843e-38	1	Cd74
Rps5	3.74427e-41	0.814753	0.967	0.9	6.47683e-37	1	Rps5
Rpl37a	4.01341e-41	0.878438	0.991	0.913	6.9424e-37	1	Rpl37a
Rpl23	1.25084e-40	0.746051	0.976	0.911	2.1637e-36	1	Rpl23
Gpr183	3.83265e-40	1.44112	0.387	0.041	6.62973e-36	1	Gpr183
Ms4a4c	7.80911e-40	1.41364	0.481	0.084	1.35082e-35	1	Ms4a4c
Ighd	1.20751e-39	1.4172	0.731	0.267	2.08874e-35	1	Ighd
Rpl9	2.37046e-39	0.683655	0.962	0.931	4.10042e-35	1	Rpl9
Rpl38	3.27386e-39	0.909945	0.972	0.889	5.66311e-35	1	Rpl38
Rps7	3.95127e-39	0.71457	0.972	0.92	6.8349e-35	1	Rps7
Rps10	2.92977e-37	0.674628	0.972	0.914	5.06792e-33	1	Rps10
Rpl36	4.66149e-37	0.834864	0.943	0.899	8.06345e-33	1	Rpl36
Rpl8	1.92834e-36	0.703064	0.976	0.924	3.33565e-32	1	Rpl8
Rpl35a	4.55752e-36	0.626903	0.981	0.934	7.8836e-32	1	Rpl35a
Rpl27a	3.58763e-34	0.663254	0.976	0.917	6.20589e-30	1	Rpl27a
Itgb7	1.79339e-33	1.24388	0.34	0.039	3.10221e-29	1	Itgb7
Rps8	1.35714e-32	0.555171	0.981	0.959	2.34758e-28	1	Rps8
Rpl39	4.56134e-32	0.681651	0.976	0.897	7.89021e-28	1	Rpl39
H2-Ob	5.70783e-32	1.23683	0.778	0.398	9.8734e-28	1	H2-Ob
Rps2	8.84378e-32	0.72832	0.972	0.881	1.5298e-27	1	Rps2
H2-DMb2	2.72571e-31	1.10519	0.877	0.474	4.71493e-27	1	H2-DMb2
Gimap7	2.88126e-31	1.09553	0.401	0.07	4.98401e-27	1	Gimap7
Rpl34	6.39544e-31	0.61423	0.972	0.911	1.10628e-26	1	Rpl34
Rps19	1.06744e-30	0.653427	0.981	0.908	1.84646e-26	1	Rps19
Rps13	3.87894e-30	0.59147	0.967	0.925	6.7098e-26	1	Rps13
Rpl19	1.54431e-29	0.58661	0.981	0.922	2.67135e-25	1	Rpl19
Eef1a1	3.59186e-29	0.554798	1	0.963	6.2132e-25	1	Eef1a1
Ltb	8.07192e-29	0.968899	0.892	0.451	1.39628e-24	1	Ltb
B4galnt1	8.66646e-28	1.28899	0.425	0.106	1.49912e-23	1	B4galnt1
Rplp1	8.7631e-28	0.728056	0.972	0.888	1.51584e-23	1	Rplp1
Rpl37	1.30885e-27	0.598845	0.967	0.925	2.26405e-23	1	Rpl37
Rplp2	1.19462e-26	0.688395	0.953	0.877	2.06645e-22	1	Rplp2
Rpl17	4.19136e-26	0.644678	0.976	0.914	7.25021e-22	1	Rpl17
Rps3	1.12006e-25	0.565646	0.976	0.911	1.93748e-21	1	Rps3
Rps28	1.63782e-25	0.645793	0.962	0.9	2.8331e-21	1	Rps28
Rpl32	4.29139e-25	0.565742	0.967	0.905	7.42325e-21	1	Rpl32
H2-Eb2	1.07071e-24	0.876768	0.274	0.036	1.85211e-20	1	H2-Eb2
Rps18	1.91243e-24	0.754773	0.934	0.813	3.30812e-20	1	Rps18
Rpl35	2.23592e-24	0.60284	0.962	0.897	3.86769e-20	1	Rpl35
Rps27a	6.28712e-24	0.533625	0.976	0.922	1.08755e-19	1	Rps27a
Rps4x	5.74043e-23	0.486349	0.958	0.919	9.92979e-19	1	Rps4x
Rpl36a	8.20409e-23	0.687792	0.934	0.824	1.41914e-18	1	Rpl36a
H2-Oa	1.20517e-22	1.14952	0.623	0.295	2.08471e-18	1	H2-Oa
Fcmr	2.1733e-22	0.877169	0.896	0.605	3.75938e-18	1	Fcmr
H2-DMa	4.82151e-22	0.969295	0.712	0.357	8.34026e-18	1	H2-DMa
Cd55	5.07295e-22	0.849333	0.599	0.251	8.77519e-18	1	Cd55
Gm8369	9.51565e-22	0.963711	0.373	0.098	1.64602e-17	1	Gm8369
Rpl14	1.25287e-21	0.697105	0.934	0.821	2.16721e-17	1	Rpl14
Rpl26	3.91651e-21	0.615463	0.972	0.885	6.77478e-17	1	Rpl26
Tuba1b	4.20069e-21	0.95497	0.387	0.109	7.26634e-17	1	Tuba1b
Rpl11	1.77177e-20	0.468305	0.981	0.928	3.0648e-16	1	Rpl11
Bmyc	2.83079e-20	0.932093	0.34	0.087	4.89671e-16	1	Bmyc
Fxyd5	6.54275e-20	0.888665	0.335	0.083	1.13177e-15	1	Fxyd5
Rpl3	1.26712e-19	0.622753	0.943	0.835	2.19186e-15	1	Rpl3
Rpl18	5.07314e-19	0.46278	0.967	0.941	8.77552e-15	1	Rpl18
Rpl22	5.54228e-19	0.609267	0.953	0.869	9.58704e-15	1	Rpl22
Rpl6	1.00809e-18	0.461659	0.972	0.927	1.7438e-14	1	Rpl6
Tpt1	1.8389e-18	0.494837	0.953	0.895	3.18093e-14	1	Tpt1
Rps23	4.14741e-18	0.581588	0.92	0.863	7.1742e-14	1	Rps23
Rabac1	1.22913e-17	0.906914	0.547	0.27	2.12614e-13	1	Rabac1
Ctss	1.25533e-17	0.785522	0.783	0.534	2.17147e-13	1	Ctss
H2-DMb1	2.08887e-17	0.764416	0.297	0.073	3.61332e-13	1	H2-DMb1
Rpl10a	1.07938e-16	0.520009	0.958	0.872	1.86711e-12	1	Rpl10a
Add3	1.2313e-16	0.860745	0.566	0.281	2.12991e-12	1	Add3
Lcp1	2.01363e-16	0.740401	0.783	0.523	3.48318e-12	1	Lcp1
Clec2i	2.47132e-16	0.738058	0.283	0.067	4.27489e-12	1	Clec2i
Gmfg	6.15393e-16	0.805729	0.651	0.354	1.06451e-11	1	Gmfg
Rps14	1.06283e-15	0.488019	0.972	0.895	1.83848e-11	1	Rps14
Rps15	1.44293e-15	0.652367	0.892	0.782	2.49599e-11	1	Rps15
Fchsd2	3.3739e-15	0.554762	0.476	0.2	5.83618e-11	1	Fchsd2
2021-03-01	7.45869e-15	0.743798	0.354	0.12	1.2902e-10	1	2021-03-01
Ccr7	1.09717e-14	1.03278	0.566	0.317	1.89789e-10	1	Ccr7
Stap1	1.32916e-14	0.86053	0.42	0.178	2.29919e-10	1	Stap1
Cr2	1.40865e-14	0.758871	0.255	0.064	2.43669e-10	1	Cr2
Ctsh	2.26147e-14	0.678097	0.604	0.324	3.9119e-10	1	Ctsh
Rpl29	3.38213e-14	0.477019	0.948	0.891	5.85041e-10	1	Rpl29
Gimap1	3.80545e-14	0.687647	0.736	0.487	6.58267e-10	1	Gimap1
Cxcr5	2.32725e-13	0.723092	0.387	0.153	4.02568e-09	1	Cxcr5
Srgn	2.79607e-13	0.704919	0.825	0.666	4.83663e-09	1	Srgn
Gpr18	3.91215e-13	0.757882	0.5	0.254	6.76724e-09	1	Gpr18
Rasgrp3	4.42835e-13	0.764638	0.269	0.081	7.66016e-09	1	Rasgrp3
Mef2c	4.73052e-13	0.686974	0.741	0.513	8.18286e-09	1	Mef2c
Gimap5	5.35502e-13	0.705898	0.278	0.086	9.26312e-09	1	Gimap5
Rps12	9.22956e-13	0.511005	0.953	0.881	1.59653e-08	1	Rps12
Rps11	1.13409e-12	0.404742	0.967	0.911	1.96175e-08	1	Rps11
Il2rg	1.20744e-12	0.727636	0.712	0.527	2.08864e-08	1	Il2rg
Helz2	1.93773e-12	0.765771	0.349	0.134	3.35188e-08	1	Helz2
Pde4b	2.52141e-12	0.643268	0.575	0.326	4.36154e-08	1	Pde4b
Stk17b	2.55092e-12	0.770105	0.642	0.404	4.41258e-08	1	Stk17b
Apoe	4.1166e-12	0.839596	0.292	0.103	7.12089e-08	1	Apoe
Ppdpf	8.98475e-12	0.724167	0.698	0.496	1.55418e-07	1	Ppdpf
Ier2	9.32816e-12	0.821139	0.406	0.181	1.61359e-07	1	Ier2
Rpl24	9.82942e-12	0.48707	0.929	0.861	1.70029e-07	1	Rpl24
Ripor2	1.27078e-11	0.545405	0.547	0.3	2.19819e-07	1	Ripor2
Fth1	1.32538e-11	0.392314	0.972	0.939	2.29264e-07	1	Fth1
Rpl12	1.35212e-11	0.548306	0.915	0.811	2.33889e-07	1	Rpl12
Arhgdib	1.45847e-11	0.461266	0.929	0.867	2.52286e-07	1	Arhgdib
Calhm2	2.05713e-11	0.758209	0.274	0.098	3.55842e-07	1	Calhm2
Iglc21	2.62127e-11	0.415713	0.925	0.559	4.53427e-07	1	Iglc2
Trim59	3.11406e-11	0.70043	0.274	0.095	5.3867e-07	1	Trim59
Bank1	5.58463e-11	0.601623	0.717	0.463	9.66029e-07	1	Bank1
Cd83	5.98524e-11	0.746575	0.302	0.114	1.03533e-06	1	Cd83
Gm11808	6.73144e-11	0.757194	0.552	0.334	1.1644e-06	1	Gm11808
Pfdn5	6.89891e-11	0.606739	0.807	0.685	1.19337e-06	1	Pfdn5
Uba52	7.84551e-11	0.637489	0.769	0.63	1.35712e-06	1	Uba52
Mif4gd	1.29847e-10	0.691026	0.547	0.326	2.2461e-06	1	Mif4gd
Trim34a	1.58541e-10	0.659825	0.264	0.097	2.74244e-06	1	Trim34a
Tubb4b	2.02544e-10	0.741433	0.547	0.337	3.50361e-06	1	Tubb4b
Iglc31	1.37763e-09	0.474801	0.91	0.715	2.38302e-05	1	Iglc3
Rpl5	1.70859e-09	0.476294	0.901	0.788	2.95552e-05	1	Rpl5
Fam69a	3.10045e-09	0.621635	0.316	0.139	5.36317e-05	1	Fam69a
Klf3	3.11158e-09	0.596667	0.363	0.176	5.3824e-05	1	Klf3
Rpl15	3.38414e-09	0.364009	0.962	0.875	5.85388e-05	1	Rpl15
Cd69	3.44399e-09	0.666802	0.274	0.106	5.95742e-05	1	Cd69
Eef1b2	5.05475e-09	0.480438	0.873	0.75	8.74371e-05	1	Eef1b2
Man1a	5.62639e-09	0.543727	0.354	0.173	9.73253e-05	1	Man1a
Ppp1r18	8.73533e-09	0.588153	0.552	0.36	0.000151104	1	Ppp1r18
Ptpn18	1.00019e-08	0.544	0.679	0.496	0.000173013	1	Ptpn18
Cyp4f18	1.95767e-08	0.550957	0.41	0.217	0.000338638	1	Cyp4f18
Trim35	2.5404e-08	0.715655	0.33	0.172	0.000439438	1	Trim35
Ier5	5.70867e-08	0.622958	0.5	0.318	0.000987486	1	Ier5
Rpl13a	6.9168e-08	0.532031	0.698	0.569	0.00119647	1	Rpl13a
Arhgap45	6.96707e-08	0.454807	0.792	0.674	0.00120516	1	Arhgap45
Rps26	7.90938e-08	0.291404	0.967	0.91	0.00136816	1	Rps26
Lmo2	1.05552e-07	0.60119	0.259	0.117	0.00182584	1	Lmo2
Rpl41	1.76737e-07	0.263308	0.991	0.941	0.0030572	1	Rpl41
Rps6	1.82894e-07	0.416896	0.873	0.793	0.0031637	1	Rps6
Rplp0	1.86627e-07	0.286245	0.967	0.916	0.00322827	1	Rplp0
Macf1	2.06387e-07	0.306253	0.453	0.273	0.00357008	1	Macf1
Hsp90aa1	3.67986e-07	0.507564	0.618	0.448	0.00636541	1	Hsp90aa1
Capg1	9.45972e-07	0.534525	0.608	0.446	0.0163634	1	Capg
Prkd2	1.06525e-06	0.461032	0.34	0.187	0.0184267	1	Prkd2
Rabep2	1.08551e-06	0.52882	0.283	0.144	0.0187772	1	Rabep2
Rpl27	1.12558e-06	0.341397	0.92	0.847	0.0194703	1	Rpl27
Cd521	1.38563e-06	0.267483	0.981	0.808	0.0239686	1	Cd52
Emp3	1.51596e-06	0.53898	0.542	0.382	0.026223	1	Emp3
Rpl7	1.62645e-06	0.294428	0.953	0.894	0.0281343	1	Rpl7
Ptges3	1.9626e-06	0.452982	0.439	0.281	0.0339491	1	Ptges3
Cmah	7.43509e-06	0.271182	0.354	0.195	0.128612	1	Cmah
Crlf3	8.69109e-06	0.553756	0.472	0.326	0.150339	1	Crlf3
Lrrk2	8.79193e-06	0.348516	0.259	0.131	0.152083	1	Lrrk2
Arhgef1	8.82665e-06	0.418609	0.689	0.548	0.152683	1	Arhgef1
Gstp1	8.95814e-06	0.48298	0.481	0.332	0.154958	1	Gstp1
Dnaja1	8.98039e-06	0.480069	0.646	0.538	0.155343	1	Dnaja1
Rpl31	9.07764e-06	0.408982	0.788	0.708	0.157025	1	Rpl31
Dnajb1	9.44998e-06	0.550234	0.368	0.225	0.163466	1	Dnajb1
Zfp36l1	1.81215e-05	0.35917	0.708	0.569	0.313465	1	Zfp36l1
Rpl4	2.15014e-05	0.329707	0.854	0.777	0.371932	1	Rpl4
Bin2	2.42334e-05	0.439762	0.278	0.154	0.41919	1	Bin2
Cnn21	2.63873e-05	0.442992	0.651	0.534	0.456448	1	Cnn2
Rpl22l1	2.80826e-05	0.368156	0.722	0.596	0.485773	1	Rpl22l1
Dgka	4.12336e-05	0.439207	0.264	0.148	0.713258	1	Dgka
Eif1	4.55005e-05	0.257754	0.967	0.895	0.787067	1	Eif1
Cox20	4.58718e-05	0.453331	0.283	0.167	0.793491	1	Cox20
Coro1a1	5.88669e-05	0.280327	0.953	0.905	1	1	Coro1a
Eef1d	6.37853e-05	0.360632	0.665	0.537	1	1	Eef1d
Adipor1	7.44381e-05	0.393919	0.354	0.222	1	1	Adipor1
Eif4a2	9.32777e-05	0.283238	0.5	0.36	1	1	Eif4a2
Pxk	0.000124787	0.416248	0.481	0.345	1	1	Pxk
Sh3bp5	0.000131414	0.398691	0.467	0.337	1	1	Sh3bp5
Tmod3	0.0001343	0.387021	0.486	0.348	1	1	Tmod3
Tsc22d31	0.000184271	0.488542	0.599	0.48	1	1	Tsc22d3
Map2k1	0.000197934	0.439057	0.283	0.175	1	1	Map2k1
Grcc10	0.000202394	0.406079	0.665	0.53	1	1	Grcc10
Fcrl1	0.000244367	0.468316	0.34	0.229	1	1	Fcrl1
Sh3bgrl31	0.000346258	0.311404	0.906	0.833	1	1	Sh3bgrl3
Ets1	0.000349172	0.318895	0.561	0.44	1	1	Ets1
Tcp11l2	0.000365454	0.300564	0.415	0.289	1	1	Tcp11l2
Tspan32	0.000366331	0.393045	0.415	0.295	1	1	Tspan32
Jak1	0.000412803	0.374973	0.458	0.349	1	1	Jak1
S100a10	0.000431677	0.355457	0.726	0.624	1	1	S100a10
Rbms1	0.000466247	0.312417	0.259	0.154	1	1	Rbms1
AB124611	0.000508876	0.320841	0.358	0.242	1	1	AB124611
Cd81	0.000544423	0.309559	0.642	0.515	1	1	Cd81
Krtcap2	0.00068666	0.267391	0.604	0.466	1	1	Krtcap2
Eno1	0.00069934	0.350211	0.519	0.412	1	1	Eno1
Lmbrd1	0.000763067	0.295593	0.358	0.253	1	1	Lmbrd1
Tgfbr2	0.000782449	0.290433	0.392	0.273	1	1	Tgfbr2
Tubb5	0.000840661	0.336521	0.642	0.54	1	1	Tubb5
Card6	0.000867458	0.312158	0.269	0.165	1	1	Card6
Grap	0.000934664	0.387667	0.42	0.309	1	1	Grap
Ubc	0.000966601	0.334596	0.712	0.654	1	1	Ubc
Akna	0.000968459	0.452842	0.283	0.184	1	1	Akna
Cybb	0.00106332	0.252603	0.316	0.204	1	1	Cybb
Dad1	0.00121236	0.283222	0.557	0.446	1	1	Dad1
Ost4	0.00128981	0.372415	0.557	0.46	1	1	Ost4
Ubl3	0.00137458	0.359598	0.34	0.237	1	1	Ubl3
Fkbp3	0.00162524	0.331051	0.363	0.259	1	1	Fkbp3
Snx3	0.00218535	0.336206	0.528	0.441	1	1	Snx3
Snrpg	0.0028553	0.306221	0.59	0.491	1	1	Snrpg
Hexb	0.00322846	0.313132	0.425	0.326	1	1	Hexb
Tspo	0.0035772	0.258315	0.505	0.406	1	1	Tspo
Il4ra	0.00368469	0.345945	0.283	0.193	1	1	Il4ra
Ndufs7	0.00504828	0.303876	0.41	0.326	1	1	Ndufs7
Cdc42se2	0.00514654	0.263097	0.368	0.275	1	1	Cdc42se2
Rhof1	0.00517098	0.263044	0.264	0.176	1	1	Rhof
Eif5	0.00517289	0.326834	0.495	0.423	1	1	Eif5
Hspa8	0.00578049	0.271476	0.925	0.9	1	1	Hspa8
Snx5	0.00589488	0.270601	0.542	0.448	1	1	Snx5
Hint1	0.00627817	0.29781	0.552	0.468	1	1	Hint1
Txnip	0.00788257	0.275115	0.613	0.512	1	1	Txnip
Rap1b1	0.0092528	0.278748	0.387	0.301	1	1	Rap1b
Rag1	4.57344e-85	2.19899	0.549	0.009	7.91114e-81	2	Rag1
Xrcc6	1.08805e-84	2.62911	0.728	0.09	1.8821e-80	2	Xrcc6
Smarca4	1.20698e-75	2.65548	0.853	0.247	2.08784e-71	2	Smarca4
Atp1b1	1.52726e-75	2.51652	0.87	0.23	2.64186e-71	2	Atp1b1
Tifa	1.329e-74	2.44221	0.712	0.111	2.2989e-70	2	Tifa
Dnajc7	8.02975e-70	2.57863	0.957	0.637	1.38899e-65	2	Dnajc7
Arl5c	9.76157e-70	2.48616	0.815	0.232	1.68856e-65	2	Arl5c
Il7r	6.56427e-69	2.25468	0.5	0.021	1.13549e-64	2	Il7r
Rag2	5.58071e-57	1.57089	0.364	0.003	9.65351e-53	2	Rag2
Fam53b	1.85075e-55	2.05706	0.696	0.152	3.20143e-51	2	Fam53b
Cecr2	3.84332e-55	1.9863	0.587	0.088	6.64817e-51	2	Cecr2
Sox4	3.15367e-53	2.06952	0.609	0.111	5.45523e-49	2	Sox4
Pafah1b3	6.143e-53	1.83149	0.891	0.469	1.06262e-48	2	Pafah1b3
Myb	8.51923e-50	1.88583	0.511	0.067	1.47366e-45	2	Myb
Ebf1	1.9038e-49	1.37828	0.984	0.915	3.29319e-45	2	Ebf1
Vpreb31	8.84323e-49	1.49847	0.957	0.725	1.5297e-44	2	Vpreb3
Mgst1	1.14163e-47	1.64189	0.5	0.067	1.97478e-43	2	Mgst1
Sec63	1.36423e-47	1.73839	0.565	0.102	2.35984e-43	2	Sec63
Cplx2	1.31969e-45	1.73012	0.516	0.082	2.2828e-41	2	Cplx2
Slc12a3	1.40888e-45	1.55946	0.326	0.01	2.43709e-41	2	Slc12a3
AL611986.1	1.71809e-44	1.38879	0.353	0.019	2.97195e-40	2	AL611986.1
Bcl7a	2.50518e-42	1.87451	0.696	0.23	4.33345e-38	2	Bcl7a
Uchl1	7.78131e-39	1.57979	0.38	0.042	1.34601e-34	2	Uchl1
Bach2	4.48052e-38	1.60021	0.739	0.281	7.75041e-34	2	Bach2
Gm37065	1.06679e-36	1.4317	0.451	0.075	1.84534e-32	2	Gm37065
Chchd10	2.03932e-36	1.29251	0.908	0.634	3.52762e-32	2	Chchd10
Bcl2l1	1.0283e-35	1.33574	0.283	0.015	1.77875e-31	2	Bcl2l1
Stambpl1	7.29334e-34	1.42482	0.554	0.151	1.2616e-29	2	Stambpl1
Capsl	1.5367e-33	1.149	0.255	0.01	2.65818e-29	2	Capsl
Il2ra	1.99575e-33	1.37446	0.326	0.034	3.45224e-29	2	Il2ra
Litaf	2.78508e-31	1.23746	0.413	0.075	4.81764e-27	2	Litaf
Spns3	5.61814e-31	1.3604	0.413	0.082	9.71826e-27	2	Spns3
Tmsb10	7.5249e-30	0.890134	0.962	0.945	1.30166e-25	2	Tmsb10
Lrmp	4.66432e-29	1.26226	0.832	0.484	8.06834e-25	2	Lrmp
Coq7	5.19726e-29	1.85324	0.516	0.163	8.99022e-25	2	Coq7
Cd93	3.99669e-28	1.39519	0.408	0.088	6.91347e-24	2	Cd93
Selenop	1.15115e-27	1.45137	0.435	0.105	1.99125e-23	2	Selenop
Pgls	1.22768e-27	1.29124	0.793	0.52	2.12365e-23	2	Pgls
Ezh2	3.1484e-27	1.2991	0.332	0.052	5.44611e-23	2	Ezh2
Ypel3	1.71747e-26	1.10846	0.859	0.589	2.97087e-22	2	Ypel3
Socs1	6.28858e-26	1.29269	0.321	0.051	1.0878e-21	2	Socs1
Tcf3	8.77104e-26	1.16611	0.81	0.564	1.51721e-21	2	Tcf3
Herpud1	1.17018e-24	1.27433	0.685	0.338	2.02418e-20	2	Herpud1
Serinc5	1.17381e-24	1.40812	0.424	0.111	2.03045e-20	2	Serinc5
Arntl	1.24295e-24	1.29214	0.31	0.051	2.15006e-20	2	Arntl
Hmga1	1.58099e-24	1.35109	0.533	0.203	2.7348e-20	2	Hmga1
Myl4	1.12395e-23	1.45395	0.391	0.099	1.9442e-19	2	Myl4
Elof1	6.19183e-23	1.20887	0.543	0.218	1.07106e-18	2	Elof1
Idh2	9.17983e-23	1.19485	0.397	0.105	1.58793e-18	2	Idh2
Lmo4	1.30776e-22	1.13359	0.451	0.132	2.26216e-18	2	Lmo4
Slc1a5	2.79164e-22	1.20125	0.696	0.381	4.82898e-18	2	Slc1a5
Cnp	4.65111e-22	1.06643	0.837	0.728	8.04548e-18	2	Cnp
Klhl6	6.24614e-22	1.25444	0.625	0.314	1.08046e-17	2	Klhl6
Hmgb1	2.53959e-21	1.01198	0.832	0.707	4.39298e-17	2	Hmgb1
Gas7	3.46574e-21	0.925404	0.293	0.054	5.99503e-17	2	Gas7
Irf4	3.51519e-21	1.10295	0.386	0.103	6.08058e-17	2	Irf4
Cdc42ep3	3.54273e-20	1.14939	0.435	0.143	6.12822e-16	2	Cdc42ep3
Zeb2	4.95653e-20	1.18017	0.56	0.235	8.5738e-16	2	Zeb2
Tmem131l	7.01166e-20	1.11251	0.641	0.327	1.21288e-15	2	Tmem131l
Akap12	9.35741e-20	1.27957	0.5	0.197	1.61864e-15	2	Akap12
Dok3	3.22835e-19	0.952825	0.821	0.567	5.58441e-15	2	Dok3
B3gnt2	4.43981e-19	1.24569	0.554	0.251	7.67998e-15	2	B3gnt2
Ddah2	8.229e-19	1.12361	0.37	0.106	1.42345e-14	2	Ddah2
Btg2	2.10919e-18	1.08364	0.734	0.493	3.64847e-14	2	Btg2
Rgs2	6.6202e-18	1.05657	0.457	0.178	1.14516e-13	2	Rgs2
Sec11c	1.56185e-17	1.00943	0.707	0.493	2.70169e-13	2	Sec11c
Desi1	2.13274e-17	1.02432	0.342	0.1	3.68921e-13	2	Desi1
Rhoh	6.07228e-17	1.09484	0.652	0.405	1.05038e-12	2	Rhoh
C1galt1	6.42953e-17	1.01198	0.326	0.091	1.11218e-12	2	C1galt1
Rpl28	6.68066e-17	0.539341	0.929	0.927	1.15562e-12	2	Rpl28
Neil1	1.30117e-16	0.910647	0.261	0.057	2.25076e-12	2	Neil1
Lgals9	1.71731e-16	1.13896	0.647	0.408	2.9706e-12	2	Lgals9
Ptma	1.78633e-16	0.571578	0.967	0.951	3.08999e-12	2	Ptma
Asf1a	6.64498e-16	1.13332	0.386	0.141	1.14945e-11	2	Asf1a
Hes6	7.30864e-16	0.995829	0.565	0.286	1.26425e-11	2	Hes6
Npc2	1.53153e-15	1.10375	0.62	0.389	2.64925e-11	2	Npc2
Txndc11	2.00581e-15	1.11015	0.457	0.199	3.46965e-11	2	Txndc11
Cyfip2	7.12066e-15	0.957946	0.668	0.398	1.23173e-10	2	Cyfip2
Fcrla	9.45748e-15	0.966815	0.788	0.637	1.63595e-10	2	Fcrla
Slamf7	1.29338e-14	1.0262	0.342	0.115	2.23729e-10	2	Slamf7
Nipbl	1.5238e-14	1.00866	0.603	0.338	2.63587e-10	2	Nipbl
Rrm2b	1.88863e-14	1.07722	0.402	0.16	3.26695e-10	2	Rrm2b
Tcf12	2.21125e-14	1.05982	0.364	0.133	3.82502e-10	2	Tcf12
Prep	2.33936e-14	1.04557	0.326	0.109	4.04663e-10	2	Prep
Hist1h1e	1.10419e-13	0.966888	0.462	0.212	1.91004e-09	2	Hist1h1e
Fam129c	1.1707e-13	0.83099	0.712	0.426	2.02508e-09	2	Fam129c
B4galt1	1.50174e-13	1.06121	0.261	0.072	2.59772e-09	2	B4galt1
Dck	3.11227e-13	0.86295	0.299	0.094	5.38361e-09	2	Dck
Cxcr4	7.06514e-13	0.824339	0.321	0.108	1.22213e-08	2	Cxcr4
Top1	1.22727e-12	1.00038	0.554	0.327	2.12293e-08	2	Top1
Csrp2	1.23708e-12	0.780786	0.424	0.178	2.1399e-08	2	Csrp2
Trp53inp1	1.36021e-12	0.962446	0.364	0.148	2.35289e-08	2	Trp53inp1
Pou2af1	1.6708e-12	0.830699	0.723	0.546	2.89015e-08	2	Pou2af1
Ftl1	1.95084e-12	0.527142	0.924	0.888	3.37456e-08	2	Ftl1
Klhl24	2.48124e-12	0.800905	0.609	0.372	4.29205e-08	2	Klhl24
Cbfa2t3	3.98728e-12	0.930346	0.467	0.229	6.8972e-08	2	Cbfa2t3
Paip2	5.4464e-12	0.727129	0.679	0.49	9.42117e-08	2	Paip2
Hibadh	1.49682e-11	0.773759	0.397	0.179	2.5892e-07	2	Hibadh
Apobec1	3.80682e-11	0.798583	0.348	0.146	6.58504e-07	2	Apobec1
Map1lc3b	7.9454e-11	0.727831	0.636	0.45	1.3744e-06	2	Map1lc3b
Mpc2	1.30797e-10	0.958984	0.446	0.238	2.26253e-06	2	Mpc2
Selplg	1.63171e-10	0.903627	0.353	0.154	2.82253e-06	2	Selplg
Cerk	1.83092e-10	0.861672	0.543	0.314	3.16713e-06	2	Cerk
Ywhae	1.9641e-10	0.700679	0.668	0.472	3.3975e-06	2	Ywhae
Gmfg1	2.39303e-10	0.78251	0.609	0.378	4.13947e-06	2	Gmfg
Cpm	2.64927e-10	1.01332	0.402	0.202	4.58271e-06	2	Cpm
Ccnd3	3.17916e-10	0.991635	0.603	0.42	5.4993e-06	2	Ccnd3
Polm	3.21887e-10	0.917913	0.397	0.196	5.56801e-06	2	Polm
Naca	3.89711e-10	0.51119	0.886	0.849	6.74123e-06	2	Naca
H3f3b	5.83617e-10	0.448438	0.967	0.943	1.00954e-05	2	H3f3b
Serinc3	9.64334e-10	0.645362	0.734	0.577	1.66811e-05	2	Serinc3
Zfp706	1.09093e-09	0.610313	0.793	0.692	1.8871e-05	2	Zfp706
Gpat3	1.33178e-09	0.690589	0.272	0.1	2.30372e-05	2	Gpat3
Ivd	1.95869e-09	0.74685	0.299	0.12	3.38813e-05	2	Ivd
Mpp1	2.0094e-09	0.675999	0.326	0.142	3.47585e-05	2	Mpp1
Kdm5b	3.4002e-09	0.813676	0.288	0.121	5.88167e-05	2	Kdm5b
Pycard	3.71855e-09	0.852914	0.511	0.33	6.43236e-05	2	Pycard
Ndufs5	3.73298e-09	0.691268	0.505	0.317	6.45731e-05	2	Ndufs5
Elf1	4.12264e-09	0.693596	0.679	0.528	7.13134e-05	2	Elf1
Clint1	5.415e-09	0.784568	0.304	0.138	9.36687e-05	2	Clint1
Pim1	6.55069e-09	0.789161	0.315	0.136	0.000113314	2	Pim1
Mzb1	1.07675e-08	0.841792	0.652	0.514	0.000186257	2	Mzb1
Fbxl12	1.17719e-08	0.73011	0.31	0.138	0.00020363	2	Fbxl12
Marcks	1.39373e-08	0.774588	0.402	0.208	0.000241087	2	Marcks
Uqcrh	1.59512e-08	0.515898	0.793	0.719	0.000275923	2	Uqcrh
Blnk	1.72685e-08	0.700194	0.701	0.617	0.000298711	2	Blnk
Pabpc1	1.85005e-08	0.462556	0.891	0.834	0.000320021	2	Pabpc1
Sptbn1	2.8095e-08	0.809063	0.457	0.259	0.000485987	2	Sptbn1
Il16	4.04571e-08	0.762994	0.603	0.441	0.000699828	2	Il16
Maf1	4.68285e-08	0.67065	0.549	0.344	0.000810039	2	Maf1
Arid5a	4.77257e-08	0.641986	0.321	0.151	0.000825559	2	Arid5a
Cox7a2l	4.85635e-08	0.643345	0.658	0.528	0.000840052	2	Cox7a2l
Srp14	5.42966e-08	0.72911	0.647	0.514	0.000939223	2	Srp14
Cdip1	5.83814e-08	0.667977	0.255	0.105	0.00100988	2	Cdip1
Ubald2	5.9656e-08	0.689697	0.489	0.315	0.00103193	2	Ubald2
Cript	6.64606e-08	0.658339	0.413	0.229	0.00114964	2	Cript
Tspan13	1.42392e-07	0.861307	0.457	0.288	0.0024631	2	Tspan13
Pkig	1.54174e-07	0.578266	0.734	0.583	0.00266691	2	Pkig
H13	1.63359e-07	0.670568	0.375	0.202	0.00282579	2	H13
Btf3	1.72666e-07	0.43635	0.821	0.819	0.00298678	2	Btf3
Txn1	1.79958e-07	0.790395	0.408	0.244	0.00311292	2	Txn1
Trim11	1.83584e-07	0.68531	0.375	0.205	0.00317563	2	Trim11
Lgals1	1.96284e-07	0.813701	0.272	0.124	0.00339533	2	Lgals1
Cd1d1	3.01161e-07	0.73931	0.321	0.158	0.00520948	2	Cd1d1
Snrpe	3.07793e-07	0.497103	0.728	0.607	0.0053242	2	Snrpe
Rtraf	3.31117e-07	0.55279	0.565	0.398	0.00572767	2	Rtraf
Mindy2	3.65602e-07	0.672211	0.332	0.17	0.00632418	2	Mindy2
Vbp1	4.26061e-07	0.586617	0.283	0.133	0.00737	2	Vbp1
Fis1	4.69758e-07	0.512133	0.69	0.584	0.00812588	2	Fis1
Mrpl43	6.00265e-07	0.543982	0.554	0.374	0.0103834	2	Mrpl43
Tmem108	6.28822e-07	0.687042	0.293	0.138	0.0108774	2	Tmem108
Cxxc5	7.60451e-07	0.546892	0.418	0.238	0.0131543	2	Cxxc5
Cox6c	7.77399e-07	0.501257	0.696	0.628	0.0134474	2	Cox6c
Eif3f	7.9693e-07	0.386016	0.853	0.864	0.0137853	2	Eif3f
Gpd1l	1.0181e-06	0.675117	0.304	0.16	0.0176111	2	Gpd1l
Mtss1	1.04088e-06	0.508449	0.549	0.368	0.0180052	2	Mtss1
Adam19	1.05216e-06	0.904049	0.304	0.161	0.0182003	2	Adam19
Aff1	1.26158e-06	0.788358	0.31	0.163	0.0218228	2	Aff1
Blvrb	1.44656e-06	0.697696	0.543	0.41	0.0250226	2	Blvrb
BC035044	1.44908e-06	0.587179	0.408	0.244	0.0250662	2	BC035044
Cd38	1.47625e-06	0.673465	0.446	0.288	0.0255362	2	Cd38
Rbm38	1.51384e-06	0.655487	0.533	0.386	0.0261864	2	Rbm38
Psmb3	1.55022e-06	0.460721	0.685	0.552	0.0268157	2	Psmb3
Prdx2	1.69731e-06	0.720643	0.489	0.369	0.02936	2	Prdx2
B2m	1.70943e-06	0.411369	0.859	0.858	0.0295698	2	B2m
Hnrnpm	1.73705e-06	0.637085	0.538	0.375	0.0300475	2	Hnrnpm
Ppp2r5a	1.80195e-06	0.661199	0.288	0.143	0.0311702	2	Ppp2r5a
Psap1	1.87827e-06	0.42146	0.832	0.734	0.0324902	2	Psap
Mylip	2.01102e-06	0.615012	0.435	0.275	0.0347867	2	Mylip
Ube2e3	2.15539e-06	0.587275	0.266	0.124	0.0372839	2	Ube2e3
Cdc25b	2.16663e-06	0.7286	0.293	0.148	0.0374784	2	Cdc25b
Eif4g2	2.17211e-06	0.548772	0.625	0.472	0.0375731	2	Eif4g2
Atp13a2	2.22718e-06	0.59772	0.364	0.206	0.0385257	2	Atp13a2
Ube2i	2.31107e-06	0.521311	0.69	0.561	0.0399769	2	Ube2i
Mxd4	2.41463e-06	0.686224	0.38	0.226	0.0417683	2	Mxd4
Sfpq	2.456e-06	0.63368	0.484	0.335	0.0424839	2	Sfpq
Arid1b	2.94046e-06	0.703559	0.261	0.126	0.050864	2	Arid1b
Acin1	3.15304e-06	0.626171	0.571	0.436	0.0545413	2	Acin1
Chchd2	3.18215e-06	0.563438	0.712	0.593	0.0550449	2	Chchd2
Pik3ap1	3.3453e-06	0.715549	0.37	0.232	0.057867	2	Pik3ap1
Adam10	3.40054e-06	0.84003	0.293	0.16	0.0588225	2	Adam10
Tra2a	3.41632e-06	0.601888	0.457	0.297	0.0590955	2	Tra2a
Wwp2	3.52214e-06	0.451883	0.304	0.155	0.060926	2	Wwp2
Plekha2	3.57187e-06	0.502768	0.63	0.498	0.0617862	2	Plekha2
Phip	4.02502e-06	0.429303	0.473	0.3	0.0696248	2	Phip
Gm13012	4.28648e-06	0.496225	0.288	0.145	0.0741475	2	Gm13012
H3f3a1	5.23401e-06	0.27036	0.935	0.954	0.0905379	2	H3f3a
Tes	6.18326e-06	0.624222	0.261	0.132	0.106958	2	Tes
H2afv	6.18988e-06	0.772032	0.571	0.468	0.107073	2	H2afv
Clta	6.43093e-06	0.356397	0.842	0.762	0.111242	2	Clta
Imp3	6.58862e-06	0.565547	0.451	0.296	0.11397	2	Imp3
Mob4	7.85422e-06	0.569313	0.364	0.217	0.135862	2	Mob4
Rnf7	8.75431e-06	0.485861	0.402	0.244	0.151432	2	Rnf7
Cox7a2	9.2314e-06	0.487316	0.647	0.544	0.159685	2	Cox7a2
Pdha1	1.18212e-05	0.603659	0.277	0.151	0.204484	2	Pdha1
Frg1	1.21188e-05	0.655003	0.397	0.259	0.20963	2	Frg1
Tomm22	1.47521e-05	0.439736	0.571	0.43	0.255182	2	Tomm22
Oaz11	1.5288e-05	0.311135	0.902	0.909	0.264452	2	Oaz1
Tspan14	1.59682e-05	0.581711	0.299	0.161	0.276219	2	Tspan14
Baz2a	1.6112e-05	0.417399	0.359	0.203	0.278706	2	Baz2a
Calm1	2.1102e-05	0.410025	0.864	0.861	0.365022	2	Calm1
Sqstm1	2.17036e-05	0.500017	0.565	0.425	0.375429	2	Sqstm1
Arpc5	2.40022e-05	0.429618	0.761	0.661	0.41519	2	Arpc5
Pim2	2.42207e-05	0.700633	0.266	0.145	0.41897	2	Pim2
Syk	2.50133e-05	0.455594	0.734	0.634	0.43268	2	Syk
Cpsf6	2.85236e-05	0.421726	0.38	0.236	0.4934	2	Cpsf6
Brd3	3.11297e-05	0.576109	0.326	0.19	0.538482	2	Brd3
Clk3	3.12289e-05	0.433049	0.266	0.138	0.540197	2	Clk3
Atox11	3.37724e-05	0.555725	0.527	0.416	0.584196	2	Atox1
Cpsf2	3.51796e-05	0.556208	0.418	0.291	0.608537	2	Cpsf2
Sem1	3.53597e-05	0.41459	0.755	0.667	0.611652	2	Sem1
Cox7c	3.59401e-05	0.410404	0.745	0.674	0.621692	2	Cox7c
Cmtm7	3.61677e-05	0.479784	0.679	0.584	0.625629	2	Cmtm7
Calm2	4.42114e-05	0.491975	0.668	0.52	0.764768	2	Calm2
Slc12a6	4.44212e-05	0.563113	0.332	0.196	0.768398	2	Slc12a6
Atp6v0c	4.71512e-05	0.521865	0.592	0.465	0.815622	2	Atp6v0c
Ppp2r1a	4.77868e-05	0.524842	0.418	0.284	0.826616	2	Ppp2r1a
Vps72	5.57221e-05	0.418753	0.299	0.166	0.96388	2	Vps72
Thoc7	5.98248e-05	0.494106	0.283	0.157	1	2	Thoc7
Cox5b	6.42663e-05	0.364458	0.701	0.605	1	2	Cox5b
Ube2a	6.46143e-05	0.596443	0.375	0.256	1	2	Ube2a
Bloc1s1	6.50393e-05	0.504851	0.429	0.299	1	2	Bloc1s1
Hnrnpk	6.77076e-05	0.397831	0.821	0.764	1	2	Hnrnpk
Sema4b	7.16722e-05	0.524568	0.326	0.202	1	2	Sema4b
Dnajb6	7.33765e-05	0.527892	0.408	0.28	1	2	Dnajb6
H2afz	7.84055e-05	0.486342	0.641	0.564	1	2	H2afz
Pdhb	8.13972e-05	0.410801	0.397	0.263	1	2	Pdhb
Nop53	8.1923e-05	0.474765	0.467	0.333	1	2	Nop53
Cox8a	8.4231e-05	0.419448	0.788	0.779	1	2	Cox8a
Slc30a5	8.56546e-05	0.512539	0.342	0.212	1	2	Slc30a5
Cdkn1b	8.80881e-05	0.518496	0.364	0.232	1	2	Cdkn1b
Zranb2	9.45345e-05	0.563626	0.359	0.238	1	2	Zranb2
Ddx5	0.000100584	0.416272	0.842	0.807	1	2	Ddx5
Dazap1	0.00010958	0.449486	0.342	0.209	1	2	Dazap1
Atp5j2	0.000111121	0.442845	0.674	0.602	1	2	Atp5j2
Ndufa6	0.000113565	0.440324	0.668	0.546	1	2	Ndufa6
Skap2	0.000115374	0.450242	0.272	0.154	1	2	Skap2
Hmgb2	0.000124531	0.614959	0.37	0.245	1	2	Hmgb2
Ube2d2a	0.000126985	0.545549	0.592	0.472	1	2	Ube2d2a
B9d2	0.000127806	0.577171	0.288	0.172	1	2	B9d2
Rcsd1	0.000129337	0.47305	0.549	0.425	1	2	Rcsd1
Mapk1	0.00013401	0.595198	0.44	0.317	1	2	Mapk1
Ndufs2	0.000136278	0.485595	0.457	0.329	1	2	Ndufs2
Hnrnpu	0.000137262	0.539003	0.62	0.568	1	2	Hnrnpu
Coro7	0.000141091	0.466103	0.272	0.154	1	2	Coro7
Rbm3	0.000141902	0.500438	0.717	0.644	1	2	Rbm3
Top2b	0.00014528	0.544764	0.511	0.405	1	2	Top2b
Eif3e	0.000151768	0.482346	0.565	0.456	1	2	Eif3e
Glul	0.000155584	0.481615	0.337	0.221	1	2	Glul
Jund	0.000161506	0.590966	0.603	0.516	1	2	Jund
Atp5a1	0.000167468	0.431034	0.696	0.637	1	2	Atp5a1
Wasf2	0.000169265	0.501716	0.543	0.432	1	2	Wasf2
Ttc5	0.000171196	0.472715	0.283	0.167	1	2	Ttc5
Tia1	0.000174555	0.438261	0.359	0.229	1	2	Tia1
H2-Q4	0.000189974	0.535027	0.538	0.429	1	2	H2-Q4
Arpc3	0.000200554	0.366351	0.799	0.767	1	2	Arpc3
Psmd8	0.000217937	0.446852	0.516	0.395	1	2	Psmd8
Stk4	0.000220196	0.486799	0.516	0.405	1	2	Stk4
Atp1b3	0.000232432	0.683464	0.293	0.181	1	2	Atp1b3
Nemf	0.000240611	0.464336	0.277	0.163	1	2	Nemf
Cux1	0.000251476	0.529551	0.478	0.345	1	2	Cux1
Spg21	0.000251713	0.684448	0.304	0.197	1	2	Spg21
Fam107b	0.000280266	0.446971	0.489	0.389	1	2	Fam107b
Ssna1	0.000285575	0.472315	0.38	0.257	1	2	Ssna1
Rbbp4	0.000309199	0.347721	0.467	0.348	1	2	Rbbp4
Becn1	0.00031998	0.395075	0.348	0.232	1	2	Becn1
Glyr1	0.000352794	0.511886	0.321	0.205	1	2	Glyr1
Ech1	0.000378793	0.444157	0.348	0.227	1	2	Ech1
Srsf5	0.000380228	0.489414	0.44	0.317	1	2	Srsf5
Gm420311	0.000383157	0.604875	0.734	0.688	1	2	Gm42031
Slamf6	0.000389687	0.612195	0.473	0.366	1	2	Slamf6
Rere	0.00040524	0.251926	0.391	0.257	1	2	Rere
Supt4a	0.000417787	0.439501	0.565	0.477	1	2	Supt4a
Ik	0.000454038	0.384904	0.321	0.208	1	2	Ik
Smarce1	0.000464881	0.382259	0.359	0.245	1	2	Smarce1
Snrpf	0.000465113	0.705501	0.489	0.42	1	2	Snrpf
Psma6	0.000507751	0.476934	0.424	0.321	1	2	Psma6
Ikzf1	0.000537551	0.459217	0.462	0.336	1	2	Ikzf1
Commd3	0.000559176	0.558251	0.304	0.197	1	2	Commd3
Atxn10	0.00055944	0.379081	0.288	0.176	1	2	Atxn10
Itpr2	0.000579799	0.478044	0.283	0.173	1	2	Itpr2
Akr1a1	0.000604768	0.472936	0.467	0.363	1	2	Akr1a1
Bzw1	0.000613608	0.395604	0.533	0.41	1	2	Bzw1
Cat	0.000669652	0.52684	0.38	0.263	1	2	Cat
Ogt	0.000687715	0.308556	0.31	0.197	1	2	Ogt
Eif4e2	0.000743474	0.369756	0.261	0.158	1	2	Eif4e2
Zfand6	0.000787662	0.462823	0.326	0.223	1	2	Zfand6
Dpp4	0.000789004	0.388267	0.283	0.175	1	2	Dpp4
Zmiz1	0.000796416	0.462535	0.266	0.166	1	2	Zmiz1
Ssh2	0.00080325	0.430415	0.321	0.208	1	2	Ssh2
Trir	0.000815767	0.526443	0.467	0.38	1	2	Trir
Ncor1	0.000829684	0.505089	0.37	0.254	1	2	Ncor1
Csnk1a1	0.000845346	0.350154	0.484	0.374	1	2	Csnk1a1
Smdt11	0.000859571	0.364121	0.565	0.471	1	2	Smdt1
Ap2s1	0.000860875	0.469057	0.418	0.299	1	2	Ap2s1
Psmb1	0.000861569	0.438063	0.603	0.535	1	2	Psmb1
Mrpl34	0.000863619	0.461905	0.359	0.256	1	2	Mrpl34
Hnrnpl	0.000870318	0.304764	0.554	0.429	1	2	Hnrnpl
Dgkd	0.000896895	0.336483	0.527	0.429	1	2	Dgkd
Esd	0.000956904	0.443388	0.457	0.356	1	2	Esd
Nol71	0.000966065	0.398209	0.636	0.58	1	2	Nol7
Pin4	0.000996122	0.351847	0.299	0.193	1	2	Pin4
Foxp1	0.00101715	0.283547	0.777	0.741	1	2	Foxp1
Scaf11	0.00104873	0.438498	0.533	0.425	1	2	Scaf11
Sdhb	0.00105364	0.409147	0.516	0.411	1	2	Sdhb
Ppp4r3b	0.0010554	0.506338	0.375	0.263	1	2	Ppp4r3b
Chtop	0.00107337	0.397003	0.332	0.223	1	2	Chtop
Vcp	0.00109867	0.446659	0.467	0.381	1	2	Vcp
Arf4	0.00111637	0.443443	0.457	0.347	1	2	Arf4
Eif3h	0.00119313	0.378494	0.75	0.713	1	2	Eif3h
Gdi2	0.00123897	0.389742	0.668	0.584	1	2	Gdi2
Cst3	0.00128448	0.466909	0.652	0.598	1	2	Cst3
Erp291	0.00128983	0.40399	0.701	0.637	1	2	Erp29
Sdhd	0.00132739	0.337637	0.293	0.19	1	2	Sdhd
Tram1	0.00134867	0.452156	0.511	0.395	1	2	Tram1
Atg101	0.00141442	0.434234	0.283	0.181	1	2	Atg101
Gtf2b	0.0014522	0.464261	0.255	0.161	1	2	Gtf2b
E2f2	0.00147469	0.661496	0.326	0.224	1	2	E2f2
Rac1	0.00148516	0.483545	0.288	0.19	1	2	Rac1
Cdc26	0.00151469	0.446565	0.326	0.226	1	2	Cdc26
Ndufa11	0.00155018	0.46841	0.5	0.411	1	2	Ndufa11
Sf3b1	0.00157122	0.325208	0.663	0.616	1	2	Sf3b1
Cbx1	0.00158664	0.373735	0.435	0.33	1	2	Cbx1
Ppp1r35	0.00162352	0.55275	0.277	0.188	1	2	Ppp1r35
Ccar1	0.00169126	0.396719	0.375	0.275	1	2	Ccar1
Mplkip	0.00169164	0.420438	0.266	0.172	1	2	Mplkip
Hnrnpul1	0.00170704	0.438176	0.342	0.244	1	2	Hnrnpul1
Skp1a	0.00178081	0.392404	0.527	0.429	1	2	Skp1a
Syf2	0.00178286	0.332539	0.516	0.408	1	2	Syf2
Ifi209	0.00180439	0.444041	0.397	0.293	1	2	Ifi209
Fbxl5	0.00190452	0.569059	0.326	0.235	1	2	Fbxl5
Dctn3	0.00209774	0.398932	0.413	0.314	1	2	Dctn3
Rbm6	0.00214944	0.26188	0.266	0.166	1	2	Rbm6
Safb	0.00216373	0.367725	0.326	0.224	1	2	Safb
Pcbp2	0.00219176	0.27108	0.837	0.773	1	2	Pcbp2
Ccm2	0.00222745	0.483822	0.538	0.45	1	2	Ccm2
Psmd3	0.00240052	0.382306	0.272	0.184	1	2	Psmd3
Dcaf8	0.00244232	0.345945	0.288	0.191	1	2	Dcaf8
Hnrnph1	0.00247653	0.345462	0.391	0.29	1	2	Hnrnph1
Mrps26	0.00249538	0.421047	0.288	0.2	1	2	Mrps26
Bub3	0.002521	0.463414	0.38	0.281	1	2	Bub3
Anapc16	0.00260634	0.322447	0.304	0.202	1	2	Anapc16
Mrpl49	0.0027126	0.334399	0.266	0.17	1	2	Mrpl49
Ppp1cb	0.00272616	0.408376	0.261	0.169	1	2	Ppp1cb
Dhx9	0.0027679	0.336807	0.38	0.274	1	2	Dhx9
Pin1	0.00281438	0.343308	0.299	0.206	1	2	Pin1
Slc9a3r1	0.00287146	0.376837	0.408	0.305	1	2	Slc9a3r1
Aimp1	0.00288174	0.341677	0.391	0.281	1	2	Aimp1
Foxo1	0.00293646	0.487875	0.44	0.353	1	2	Foxo1
Ubl5	0.00316746	0.310227	0.69	0.652	1	2	Ubl5
Rtn4	0.00326629	0.354499	0.272	0.181	1	2	Rtn4
Fgfr1op2	0.0035235	0.360543	0.413	0.323	1	2	Fgfr1op2
Mef2d	0.00360351	0.377248	0.31	0.211	1	2	Mef2d
Bloc1s2	0.00363246	0.5183	0.321	0.242	1	2	Bloc1s2
Dusp11	0.00366307	0.351485	0.408	0.317	1	2	Dusp11
Gnb2	0.003758	0.270074	0.696	0.638	1	2	Gnb2
Swi5	0.00383302	0.402811	0.489	0.395	1	2	Swi5
Rps27l	0.00393292	0.472028	0.386	0.299	1	2	Rps27l
Sh3glb1	0.00393458	0.378959	0.543	0.462	1	2	Sh3glb1
Cuedc2	0.00411993	0.429258	0.353	0.272	1	2	Cuedc2
Ndufb3	0.00417572	0.380282	0.408	0.315	1	2	Ndufb3
Ppp1cc	0.00421552	0.416251	0.424	0.327	1	2	Ppp1cc
Psmc3	0.00422887	0.358595	0.391	0.29	1	2	Psmc3
Rab11b	0.0042357	0.338417	0.5	0.396	1	2	Rab11b
Sat1	0.00437678	0.326972	0.429	0.326	1	2	Sat1
Cox5a	0.00441011	0.31857	0.609	0.516	1	2	Cox5a
Arf1	0.00444926	0.29487	0.674	0.596	1	2	Arf1
Ssu72	0.00454898	0.444064	0.408	0.314	1	2	Ssu72
Stx5a	0.00455081	0.359938	0.277	0.19	1	2	Stx5a
Iscu	0.00463283	0.350234	0.375	0.277	1	2	Iscu
Mcrs1	0.00474185	0.306275	0.266	0.181	1	2	Mcrs1
Cnot2	0.00494488	0.288372	0.288	0.203	1	2	Cnot2
Rbm17	0.00500663	0.409262	0.359	0.271	1	2	Rbm17
Mrpl18	0.00504815	0.36056	0.397	0.317	1	2	Mrpl18
Mrpl57	0.00507124	0.441346	0.364	0.272	1	2	Mrpl57
Ndufb5	0.00509223	0.399257	0.489	0.393	1	2	Ndufb5
Cnot8	0.00541137	0.384531	0.299	0.217	1	2	Cnot8
Gm42418	0.00545688	0.250815	1	1	1	2	Gm42418
Ifi27	0.0056166	0.482977	0.255	0.178	1	2	Ifi27
Maz	0.0056628	0.419614	0.283	0.194	1	2	Maz
Gpcpd1	0.0058247	0.311686	0.391	0.299	1	2	Gpcpd1
Pnrc1	0.00617503	0.28339	0.576	0.516	1	2	Pnrc1
Ubap2l	0.00627781	0.310098	0.37	0.272	1	2	Ubap2l
Arpc1a	0.00629103	0.31671	0.304	0.214	1	2	Arpc1a
Eif3k	0.00645417	0.317641	0.701	0.656	1	2	Eif3k
Ewsr1	0.00648883	0.316373	0.5	0.422	1	2	Ewsr1
Luc7l3	0.00657007	0.391589	0.386	0.306	1	2	Luc7l3
Cdkn2d1	0.00665739	0.357864	0.342	0.253	1	2	Cdkn2d
Cct7	0.00694911	0.326307	0.44	0.354	1	2	Cct7
Eif4h	0.00727786	0.394506	0.375	0.293	1	2	Eif4h
Cox17	0.00763165	0.337378	0.386	0.299	1	2	Cox17
Hp1bp3	0.00772571	0.477409	0.304	0.223	1	2	Hp1bp3
Ptprcap1	0.00773759	0.259211	0.842	0.852	1	2	Ptprcap
Ankrd11	0.00776574	0.374604	0.332	0.238	1	2	Ankrd11
Papola	0.00778737	0.37023	0.397	0.318	1	2	Papola
Chmp5	0.00834666	0.398919	0.272	0.187	1	2	Chmp5
Dynlrb1	0.00842968	0.381697	0.391	0.303	1	2	Dynlrb1
Ddx24	0.00873186	0.401426	0.446	0.372	1	2	Ddx24
Mdm2	0.00887831	0.350838	0.255	0.179	1	2	Mdm2
Atp5f1	0.00888008	0.350082	0.614	0.559	1	2	Atp5f1
Pdap1	0.00888744	0.294572	0.315	0.227	1	2	Pdap1
Psmd4	0.00903486	0.39322	0.397	0.314	1	2	Psmd4
Nudt21	0.00909896	0.395771	0.375	0.294	1	2	Nudt21
Gdi1	0.00915819	0.516562	0.37	0.287	1	2	Gdi1
Uqcrq	0.00939073	0.408379	0.505	0.416	1	2	Uqcrq
Ufm1	0.00963579	0.381131	0.266	0.191	1	2	Ufm1
Hdac7	0.00977277	0.283739	0.261	0.173	1	2	Hdac7
Ccnd21	1.79835e-35	2.11997	0.768	0.137	3.11078e-31	3	Ccnd2
Srm	2.35039e-33	1.35323	0.482	0.044	4.06571e-29	3	Srm
Mettl1	1.15886e-31	1.02603	0.375	0.025	2.0046e-27	3	Mettl1
Myc	1.63373e-25	1.29012	0.357	0.031	2.82603e-21	3	Myc
Apex1	2.27942e-25	1.26516	0.536	0.08	3.94295e-21	3	Apex1
Wnt10a	2.5094e-23	1.16423	0.357	0.036	4.34076e-19	3	Wnt10a
Nop16	3.29127e-23	1.04768	0.536	0.083	5.69325e-19	3	Nop16
Grwd1	7.961e-23	0.926681	0.339	0.033	1.37709e-18	3	Grwd1
Bcl3	2.18856e-22	1.17096	0.696	0.153	3.78577e-18	3	Bcl3
Mrto4	1.92768e-21	1.03538	0.518	0.087	3.3345e-17	3	Mrto4
Cfp1	1.15635e-20	1.38262	0.696	0.179	2.00026e-16	3	Cfp
Ranbp1	1.04539e-19	1.35669	0.714	0.198	1.80831e-15	3	Ranbp1
Rcl1	5.93471e-19	0.677299	0.339	0.04	1.02659e-14	3	Rcl1
Tsr1	1.27181e-18	0.735346	0.286	0.029	2.19999e-14	3	Tsr1
Nhp2	2.1236e-18	1.10799	0.679	0.167	3.67341e-14	3	Nhp2
Grn	3.72135e-18	1.35167	0.732	0.226	6.4372e-14	3	Grn
Eif5a	4.40501e-18	1.32784	0.982	0.705	7.61979e-14	3	Eif5a
Nfkbid	9.63578e-18	2.2784	0.464	0.088	1.6668e-13	3	Nfkbid
Hspa9	1.03431e-17	1.00665	0.643	0.156	1.78915e-13	3	Hspa9
Psme2	1.41404e-17	1.57327	0.875	0.455	2.44601e-13	3	Psme2
Timm8a1	3.47482e-17	0.810541	0.339	0.046	6.01075e-13	3	Timm8a1
Hsp90ab1	4.36828e-17	1.12437	1	0.902	7.55625e-13	3	Hsp90ab1
Shmt2	2.54008e-16	0.845183	0.411	0.07	4.39383e-12	3	Shmt2
C1qbp	6.43708e-16	1.44608	0.661	0.212	1.11349e-11	3	C1qbp
Npm1	1.60642e-15	1.18298	0.946	0.689	2.77879e-11	3	Npm1
Gar1	1.82399e-15	0.892596	0.464	0.095	3.15513e-11	3	Gar1
Atp5g1	1.86247e-15	1.18243	0.875	0.405	3.2217e-11	3	Atp5g1
Ppa1	7.75263e-15	0.665609	0.286	0.038	1.34105e-10	3	Ppa1
Mif	8.60516e-15	1.60905	0.821	0.418	1.48852e-10	3	Mif
Ppia	9.20474e-15	0.907158	1	0.908	1.59224e-10	3	Ppia
Psmd1	1.98888e-14	0.665421	0.554	0.128	3.44036e-10	3	Psmd1
Rps22	2.64357e-14	1.05299	0.964	0.9	4.57285e-10	3	Rps2
Pno1	2.75629e-14	0.676367	0.357	0.06	4.76783e-10	3	Pno1
Gnl3	4.92953e-14	1.15483	0.375	0.072	8.52711e-10	3	Gnl3
Cd831	6.9183e-14	1.35585	0.518	0.136	1.19673e-09	3	Cd83
Tbl3	8.02298e-14	0.652328	0.411	0.08	1.38781e-09	3	Tbl3
Dctpp1	1.17464e-13	0.96	0.375	0.073	2.03189e-09	3	Dctpp1
Atic	1.55897e-13	0.881745	0.536	0.139	2.6967e-09	3	Atic
Phgdh	2.89378e-13	1.18625	0.554	0.168	5.00565e-09	3	Phgdh
Bzw2	3.15203e-13	0.721297	0.393	0.078	5.45238e-09	3	Bzw2
Fbl	2.7169e-12	1.1375	0.732	0.305	4.69969e-08	3	Fbl
Pa2g4	3.56479e-12	1.23358	0.768	0.351	6.16637e-08	3	Pa2g4
Il4i1	5.3701e-12	2.22957	0.518	0.163	9.28919e-08	3	Il4i1
G3bp1	7.07806e-12	0.910162	0.804	0.34	1.22436e-07	3	G3bp1
Hnrnpa1	7.08461e-12	0.988576	0.893	0.501	1.2255e-07	3	Hnrnpa1
Nop2	7.59813e-12	0.54377	0.339	0.065	1.31432e-07	3	Nop2
Hspd1	7.72068e-12	1.13003	0.714	0.269	1.33552e-07	3	Hspd1
Hspe1	1.01309e-11	1.15652	0.857	0.514	1.75245e-07	3	Hspe1
Phb	2.59381e-11	0.85247	0.589	0.189	4.48676e-07	3	Phb
Wdr46	2.6991e-11	0.63839	0.339	0.069	4.6689e-07	3	Wdr46
Nme2	2.87421e-11	1.14224	0.696	0.299	4.97182e-07	3	Nme2
Ssrp1	3.5523e-11	0.915626	0.768	0.301	6.14476e-07	3	Ssrp1
Mybbp1a	4.14041e-11	0.859985	0.536	0.168	7.16209e-07	3	Mybbp1a
Ppan	5.59615e-11	0.942592	0.446	0.123	9.68022e-07	3	Ppan
Cd522	7.35084e-11	0.902215	0.964	0.843	1.27155e-06	3	Cd52
Snrpa1	8.42632e-11	0.757843	0.482	0.139	1.45759e-06	3	Snrpa1
Eif2s1	9.54354e-11	0.687382	0.661	0.216	1.65084e-06	3	Eif2s1
Timm10	1.16939e-10	0.87246	0.357	0.084	2.02282e-06	3	Timm10
Ldha	1.30981e-10	0.995813	0.893	0.427	2.26571e-06	3	Ldha
Ybx1	1.68002e-10	0.987717	0.946	0.668	2.9061e-06	3	Ybx1
Polr2f	1.96472e-10	0.738212	0.571	0.184	3.39857e-06	3	Polr2f
Bhlhe40	2.04759e-10	0.562701	0.268	0.049	3.54192e-06	3	Bhlhe40
Arhgap24	2.28504e-10	0.729137	0.482	0.144	3.95267e-06	3	Arhgap24
Znhit6	2.30899e-10	0.582856	0.286	0.055	3.99409e-06	3	Znhit6
Hsd17b12	2.41744e-10	0.692318	0.375	0.089	4.18169e-06	3	Hsd17b12
Rrs1	2.47622e-10	0.867258	0.375	0.094	4.28337e-06	3	Rrs1
Grap1	3.30773e-10	0.9579	0.732	0.309	5.72172e-06	3	Grap
Nop58	5.49497e-10	0.792298	0.5	0.152	9.5052e-06	3	Nop58
Ftsj3	7.12262e-10	0.748808	0.446	0.128	1.23207e-05	3	Ftsj3
Nolc1	7.1973e-10	0.747931	0.411	0.112	1.24499e-05	3	Nolc1
Atad3a	7.32624e-10	0.595947	0.286	0.058	1.26729e-05	3	Atad3a
Hnrnpa2b1	7.77578e-10	0.712229	1	0.886	1.34505e-05	3	Hnrnpa2b1
Snrpd1	8.40256e-10	0.893929	0.625	0.238	1.45348e-05	3	Snrpd1
Mrpl17	1.4279e-09	0.774816	0.518	0.173	2.46998e-05	3	Mrpl17
Eif4a1	1.48378e-09	1.16325	0.821	0.503	2.56665e-05	3	Eif4a1
Gng10	1.61331e-09	0.666361	0.464	0.138	2.79071e-05	3	Gng10
Wdr12	1.86987e-09	0.738087	0.321	0.075	3.23451e-05	3	Wdr12
Rexo2	2.08781e-09	0.598763	0.429	0.119	3.6115e-05	3	Rexo2
Ncl	2.18447e-09	1.02384	0.821	0.482	3.77869e-05	3	Ncl
Tomm40	2.80586e-09	0.762972	0.482	0.154	4.85358e-05	3	Tomm40
Atp5g3	3.41418e-09	0.738719	0.946	0.674	5.90585e-05	3	Atp5g3
Uqcc2	3.53688e-09	0.716673	0.554	0.186	6.11809e-05	3	Uqcc2
Rrp15	4.61971e-09	0.662298	0.286	0.065	7.99118e-05	3	Rrp15
Naxe	5.21319e-09	0.501342	0.482	0.143	9.01778e-05	3	Naxe
Mtfr1l	5.51889e-09	0.577942	0.411	0.114	9.54658e-05	3	Mtfr1l
Bri3bp	5.63883e-09	0.692616	0.393	0.112	9.75404e-05	3	Bri3bp
Prmt1	9.4242e-09	0.737233	0.679	0.275	0.00016302	3	Prmt1
Heatr1	9.436e-09	0.484877	0.268	0.056	0.000163224	3	Heatr1
Cct3	9.52921e-09	0.723599	0.661	0.251	0.000164836	3	Cct3
Eif5b	1.05557e-08	0.755169	0.607	0.247	0.000182592	3	Eif5b
Polr1c	1.09487e-08	0.496389	0.304	0.07	0.000189391	3	Polr1c
Hmgn2	1.22088e-08	0.78521	0.661	0.29	0.000211188	3	Hmgn2
Lsm2	1.39739e-08	0.659979	0.464	0.148	0.000241721	3	Lsm2
Ran	1.43252e-08	0.786233	0.911	0.523	0.000247797	3	Ran
Ube2l3	1.49863e-08	0.592282	0.625	0.228	0.000259234	3	Ube2l3
Fam136a	1.82539e-08	0.620719	0.268	0.06	0.000315756	3	Fam136a
Utp14a	1.93171e-08	0.535721	0.429	0.128	0.000334147	3	Utp14a
Ola1	2.0225e-08	0.551621	0.536	0.186	0.000349852	3	Ola1
Nob1	2.42478e-08	0.533199	0.429	0.127	0.000419438	3	Nob1
Lsm4	2.68503e-08	0.844054	0.786	0.383	0.000464457	3	Lsm4
Banf1	2.78744e-08	0.715936	0.839	0.439	0.000482171	3	Banf1
Mcm6	2.96242e-08	0.832043	0.286	0.068	0.00051244	3	Mcm6
Aprt	3.01004e-08	0.669212	0.464	0.148	0.000520677	3	Aprt
Cd24a1	3.13e-08	0.870115	0.911	0.728	0.000541428	3	Cd24a
Gm10131	4.3107e-08	0.51077	0.286	0.068	0.000745664	3	Gm10131
Ddx39b	4.3936e-08	0.699448	0.875	0.434	0.000760004	3	Ddx39b
Lyar	4.90378e-08	0.772697	0.411	0.13	0.000848256	3	Lyar
Actb1	4.99015e-08	0.474017	1	0.975	0.000863196	3	Actb
Impdh2	5.78471e-08	0.840475	0.518	0.207	0.00100064	3	Impdh2
Ak2	6.54307e-08	0.542291	0.679	0.262	0.00113182	3	Ak2
Eif3i	6.85772e-08	0.8657	0.768	0.4	0.00118625	3	Eif3i
Set	6.95896e-08	0.812093	0.696	0.314	0.00120376	3	Set
Fkbp4	7.37366e-08	0.643345	0.643	0.262	0.0012755	3	Fkbp4
Arl8b	7.5207e-08	0.533815	0.429	0.134	0.00130093	3	Arl8b
Gtpbp4	8.40364e-08	0.678141	0.446	0.152	0.00145366	3	Gtpbp4
Tomm7	8.5044e-08	0.668468	0.839	0.444	0.00147109	3	Tomm7
Poldip2	8.53793e-08	0.396435	0.321	0.083	0.00147689	3	Poldip2
Snx12	8.81129e-08	0.38927	0.321	0.084	0.00152418	3	Snx12
Mbd3	9.40231e-08	0.485223	0.464	0.148	0.00162641	3	Mbd3
Dkc1	1.0449e-07	0.751854	0.464	0.164	0.00180747	3	Dkc1
Timm50	1.14968e-07	0.382111	0.375	0.105	0.00198872	3	Timm50
Junb	1.40328e-07	0.803453	0.679	0.31	0.0024274	3	Junb
U2af1	1.42677e-07	0.635872	0.714	0.341	0.00246803	3	U2af1
Wdr77	1.62317e-07	0.487398	0.304	0.08	0.00280777	3	Wdr77
Nol8	1.6409e-07	0.503829	0.321	0.089	0.00283843	3	Nol8
Rpl141	1.69449e-07	0.616268	0.964	0.841	0.00293112	3	Rpl14
Anp32b	1.77755e-07	0.765458	0.786	0.424	0.00307481	3	Anp32b
Cfdp1	1.99971e-07	0.616226	0.536	0.193	0.0034591	3	Cfdp1
Mrps17	2.20114e-07	0.563268	0.464	0.159	0.00380753	3	Mrps17
Icam1	2.23792e-07	0.989524	0.321	0.097	0.00387115	3	Icam1
Eif1a	2.30309e-07	0.472099	0.304	0.084	0.00398388	3	Eif1a
Rps25	2.47602e-07	0.611383	0.964	0.74	0.00428302	3	Rps25
Hspa81	2.53674e-07	0.707546	1	0.9	0.00438806	3	Hspa8
Mrpl42	2.65025e-07	0.541277	0.482	0.172	0.0045844	3	Mrpl42
Pfn11	2.65273e-07	0.540327	0.964	0.923	0.00458869	3	Pfn1
Eef1b21	2.68804e-07	0.533993	0.964	0.768	0.00464976	3	Eef1b2
Aen	2.72337e-07	0.516704	0.304	0.082	0.00471089	3	Aen
Cct5	2.95967e-07	0.76468	0.75	0.418	0.00511964	3	Cct5
Dnajc19	2.97766e-07	0.417087	0.5	0.174	0.00515076	3	Dnajc19
Cox6c1	2.99052e-07	0.657712	0.893	0.625	0.005173	3	Cox6c
Eif3b	2.99974e-07	0.593947	0.518	0.197	0.00518896	3	Eif3b
Ift20	3.17157e-07	0.616408	0.464	0.171	0.00548618	3	Ift20
Syncrip	3.75614e-07	0.490057	0.464	0.162	0.00649738	3	Syncrip
Hnrnpa3	3.93904e-07	0.644931	0.946	0.714	0.00681374	3	Hnrnpa3
Dynlt3	4.31961e-07	0.433619	0.375	0.115	0.00747207	3	Dynlt3
Txn2	4.58865e-07	0.675633	0.679	0.33	0.00793745	3	Txn2
Snrpf1	4.91539e-07	0.579969	0.804	0.409	0.00850264	3	Snrpf
Rps121	5.25334e-07	0.560078	0.964	0.895	0.00908723	3	Rps12
Ptpn61	6.07931e-07	0.584859	0.946	0.693	0.010516	3	Ptpn6
Smarcb1	6.39112e-07	0.545487	0.571	0.222	0.0110554	3	Smarcb1
Sdhaf1	6.4345e-07	0.526516	0.321	0.095	0.0111304	3	Sdhaf1
Cct8	6.61737e-07	0.555781	0.75	0.365	0.0114467	3	Cct8
Sfxn1	7.08528e-07	0.496065	0.411	0.139	0.0122561	3	Sfxn1
Tcof11	7.15783e-07	0.532805	0.643	0.279	0.0123816	3	Tcof1
Pepd	7.41625e-07	0.482411	0.304	0.087	0.0128286	3	Pepd
Trim28	7.85596e-07	0.564578	0.429	0.151	0.0135892	3	Trim28
Pigt	7.86581e-07	0.547793	0.554	0.215	0.0136063	3	Pigt
Ruvbl2	8.0298e-07	0.52921	0.357	0.113	0.01389	3	Ruvbl2
Lzic	8.30106e-07	0.512735	0.321	0.095	0.0143592	3	Lzic
Rpl7l1	8.9317e-07	0.606937	0.536	0.216	0.0154501	3	Rpl7l1
Rplp11	9.00026e-07	0.491641	0.982	0.903	0.0155686	3	Rplp1
Cox5a1	9.22913e-07	0.634918	0.839	0.514	0.0159645	3	Cox5a
Mtx2	9.66051e-07	0.473589	0.304	0.089	0.0167107	3	Mtx2
Fam129c1	9.70443e-07	0.653296	0.804	0.465	0.0167867	3	Fam129c
Mrps18b	9.85415e-07	0.446204	0.321	0.094	0.0170457	3	Mrps18b
Prdx51	1.01709e-06	0.730139	0.786	0.418	0.0175936	3	Prdx5
Clpp	1.06495e-06	0.411008	0.375	0.118	0.0184214	3	Clpp
Snrpd3	1.07273e-06	0.665774	0.732	0.399	0.0185561	3	Snrpd3
Hnrnpd	1.11694e-06	0.5866	0.429	0.158	0.0193209	3	Hnrnpd
Ostc1	1.11913e-06	0.680604	0.696	0.31	0.0193586	3	Ostc
Dtymk	1.21243e-06	0.443233	0.357	0.112	0.0209726	3	Dtymk
Psmb81	1.21567e-06	0.553787	0.964	0.674	0.0210287	3	Psmb8
Nudc	1.21723e-06	0.616091	0.571	0.25	0.0210557	3	Nudc
Cct2	1.22163e-06	0.65586	0.786	0.45	0.0211318	3	Cct2
Sumo2	1.25104e-06	0.573294	0.929	0.716	0.0216404	3	Sumo2
Swap70	1.28527e-06	0.635278	0.786	0.463	0.0222326	3	Swap70
Mrps28	1.28547e-06	0.371053	0.357	0.112	0.0222361	3	Mrps28
Afg3l2	1.36151e-06	0.36594	0.286	0.079	0.0235514	3	Afg3l2
Cox7b	1.37565e-06	0.708412	0.696	0.412	0.0237961	3	Cox7b
Cpsf1	1.42241e-06	0.517931	0.321	0.095	0.0246048	3	Cpsf1
Pebp1	1.44088e-06	0.69597	0.732	0.391	0.0249243	3	Pebp1
Atp5b	1.4436e-06	0.603736	0.929	0.665	0.0249714	3	Atp5b
Nop10	1.46889e-06	0.712024	0.857	0.469	0.0254088	3	Nop10
Rps17	1.47112e-06	0.688717	0.929	0.694	0.0254475	3	Rps17
Sms	1.53884e-06	0.585737	0.536	0.22	0.0266188	3	Sms
Rpl33	1.5616e-06	0.535184	0.964	0.854	0.0270126	3	Rpl3
Trmt6	1.56568e-06	0.364928	0.286	0.079	0.0270831	3	Trmt6
Polr2h	1.71243e-06	0.491352	0.304	0.089	0.0296217	3	Polr2h
Psmb5	1.84586e-06	0.586561	0.786	0.402	0.0319296	3	Psmb5
Srpk1	1.906e-06	0.520394	0.286	0.083	0.0329701	3	Srpk1
Wdr43	2.00655e-06	0.448195	0.304	0.092	0.0347092	3	Wdr43
Vps4a	2.14557e-06	0.360927	0.375	0.122	0.0371141	3	Vps4a
Pum3	2.17988e-06	0.473461	0.339	0.108	0.0377076	3	Pum3
Rpn1	2.32045e-06	0.411458	0.607	0.243	0.0401391	3	Rpn1
Prdx1	2.67797e-06	0.577352	0.821	0.514	0.0463236	3	Prdx1
Ndufa4	2.75112e-06	0.556665	0.929	0.637	0.0475889	3	Ndufa4
Zbtb8os	3.18524e-06	0.364026	0.411	0.143	0.0550983	3	Zbtb8os
Fkbp31	3.30461e-06	0.658144	0.571	0.265	0.0571632	3	Fkbp3
Trp53	3.39152e-06	0.701897	0.661	0.319	0.0586666	3	Trp53
Srsf2	3.53485e-06	0.59855	0.696	0.345	0.0611459	3	Srsf2
Psma7	3.57931e-06	0.608182	0.75	0.407	0.061915	3	Psma7
Rplp21	3.58296e-06	0.500057	0.982	0.89	0.0619781	3	Rplp2
Hck1	4.00465e-06	0.557914	0.768	0.419	0.0692724	3	Hck
Lrpprc	4.4345e-06	0.338394	0.268	0.075	0.0767081	3	Lrpprc
Slc25a5	4.44133e-06	0.680815	0.911	0.624	0.0768261	3	Slc25a5
Rsl1d1	4.55814e-06	0.36259	0.446	0.164	0.0788467	3	Rsl1d1
Slc35a4	4.65779e-06	0.438617	0.321	0.102	0.0805704	3	Slc35a4
Ifi471	4.67566e-06	0.629177	0.5	0.216	0.0808796	3	Ifi47
Ppie	4.68809e-06	0.444432	0.339	0.11	0.0810945	3	Ppie
Dap3	5.00075e-06	0.368469	0.375	0.128	0.0865029	3	Dap3
Fcer2a1	5.09463e-06	0.68949	0.554	0.247	0.088127	3	Fcer2a
Pes1	5.60147e-06	0.477684	0.464	0.179	0.0968942	3	Pes1
Nsun2	5.70809e-06	0.728597	0.375	0.137	0.0987385	3	Nsun2
Rftn1	5.75898e-06	0.699147	0.429	0.168	0.0996188	3	Rftn1
Rpl22l11	6.12819e-06	0.710783	0.875	0.61	0.106005	3	Rpl22l1
Pdcd5	6.15029e-06	0.568087	0.589	0.275	0.106388	3	Pdcd5
Atp5j	6.43443e-06	0.622065	0.911	0.582	0.111303	3	Atp5j
Pam16	6.47644e-06	0.418837	0.357	0.122	0.112029	3	Pam16
Cd401	6.88013e-06	0.705725	0.554	0.261	0.119013	3	Cd40
2310033P09Rik	7.16397e-06	0.478728	0.339	0.115	0.123922	3	2310033P09Rik
Naa10	7.16604e-06	0.391215	0.286	0.089	0.123958	3	Naa10
Ifi351	7.39068e-06	0.577022	0.5	0.216	0.127844	3	Ifi35
Pbdc1	7.54048e-06	0.4839	0.357	0.127	0.130435	3	Pbdc1
Cyba1	7.78974e-06	0.625181	0.964	0.789	0.134747	3	Cyba
Ehd1	8.16548e-06	0.568769	0.482	0.194	0.141247	3	Ehd1
Atf6b	8.55813e-06	0.495858	0.464	0.181	0.148039	3	Atf6b
Stoml2	8.67935e-06	0.461399	0.375	0.136	0.150135	3	Stoml2
Rsl24d1	8.741e-06	0.399005	0.411	0.152	0.151202	3	Rsl24d1
Smu1	8.88008e-06	0.374689	0.5	0.194	0.153608	3	Smu1
Pgk1	8.92062e-06	0.616	0.571	0.287	0.154309	3	Pgk1
Pkm	9.0673e-06	0.569378	0.821	0.497	0.156846	3	Pkm
Pomp	9.17187e-06	0.6481	0.714	0.415	0.158655	3	Pomp
Gapdh	9.26392e-06	0.607197	0.786	0.548	0.160247	3	Gapdh
Cs	9.30659e-06	0.390844	0.554	0.226	0.160985	3	Cs
Iah1	9.42018e-06	0.418938	0.411	0.154	0.16295	3	Iah1
Nip7	9.44888e-06	0.519385	0.429	0.169	0.163447	3	Nip7
Mrps5	9.48562e-06	0.3877	0.357	0.122	0.164082	3	Mrps5
Fcmr1	9.55724e-06	0.463644	0.929	0.66	0.165321	3	Fcmr
2010309G21Rik	9.56478e-06	0.652614	0.464	0.207	0.165452	3	2010309G21Rik
Ndufv1	9.5724e-06	0.389535	0.446	0.171	0.165583	3	Ndufv1
Tmed9	9.86209e-06	0.691921	0.732	0.407	0.170594	3	Tmed9
Ddx18	1.00594e-05	0.455684	0.464	0.183	0.174008	3	Ddx18
Strap	1.01957e-05	0.463895	0.554	0.241	0.176364	3	Strap
Faim	1.02034e-05	0.335858	0.321	0.103	0.176499	3	Faim
Fcf1	1.02469e-05	0.439182	0.429	0.158	0.177252	3	Fcf1
Chmp1a	1.09047e-05	0.31277	0.429	0.152	0.188629	3	Chmp1a
Gtf2f1	1.10673e-05	0.457793	0.357	0.124	0.191442	3	Gtf2f1
Tnfrsf13c1	1.12136e-05	0.736151	0.911	0.645	0.193973	3	Tnfrsf13c
Sik1	1.22365e-05	0.659086	0.304	0.103	0.211667	3	Sik1
Wdr18	1.36685e-05	0.339402	0.268	0.08	0.236438	3	Wdr18
Nfkbie	1.37479e-05	0.57362	0.5	0.227	0.237811	3	Nfkbie
Rce1	1.38603e-05	0.365487	0.286	0.092	0.239755	3	Rce1
Sssca1	1.40964e-05	0.476264	0.339	0.12	0.243839	3	Sssca1
Cops7a	1.46494e-05	0.377248	0.268	0.082	0.253405	3	Cops7a
Uqcrq1	1.47751e-05	0.619536	0.679	0.418	0.25558	3	Uqcrq
Npm3	1.54036e-05	0.506194	0.446	0.182	0.266451	3	Npm3
Wdr61	1.55655e-05	0.311435	0.411	0.151	0.269253	3	Wdr61
Rilpl2	1.57491e-05	0.742435	0.375	0.153	0.272427	3	Rilpl2
Fnbp1	1.58671e-05	0.385107	0.375	0.139	0.274468	3	Fnbp1
Ndufb2	1.6171e-05	0.464652	0.536	0.235	0.279725	3	Ndufb2
Bst21	1.69056e-05	0.346052	0.518	0.215	0.292433	3	Bst2
2021-09-06	1.89261e-05	0.522657	0.536	0.242	0.327383	3	2021-09-06
Mif4gd1	2.05372e-05	0.604461	0.714	0.358	0.355252	3	Mif4gd
Erg28	2.15081e-05	0.365692	0.339	0.119	0.372047	3	Erg28
Pmpca	2.23034e-05	0.304261	0.286	0.09	0.385805	3	Pmpca
2410004B18Rik	2.31481e-05	0.384996	0.268	0.084	0.400415	3	2410004B18Rik
Mdh2	2.43333e-05	0.538465	0.714	0.407	0.420917	3	Mdh2
Rplp01	2.4742e-05	0.414135	0.982	0.925	0.427987	3	Rplp0
Pop7	2.61458e-05	0.424637	0.375	0.146	0.45227	3	Pop7
Imp4	2.62395e-05	0.415629	0.339	0.123	0.45389	3	Imp4
Ak6	2.63493e-05	0.387535	0.321	0.11	0.45579	3	Ak6
Capza1	2.65457e-05	0.533206	0.786	0.404	0.459188	3	Capza1
Rwdd1	2.66915e-05	0.450136	0.536	0.23	0.461709	3	Rwdd1
Emc4	2.75278e-05	0.358545	0.339	0.12	0.476176	3	Emc4
Glrx3	2.84485e-05	0.398782	0.589	0.26	0.492102	3	Glrx3
Mrpl16	2.92485e-05	0.40406	0.286	0.095	0.505941	3	Mrpl16
Mea1	3.05204e-05	0.348505	0.571	0.238	0.527942	3	Mea1
Wdr83os	3.06738e-05	0.632355	0.589	0.296	0.530595	3	Wdr83os
Rbm31	3.07966e-05	0.571971	0.929	0.641	0.53272	3	Rbm3
Cks2	3.10134e-05	0.387992	0.268	0.087	0.53647	3	Cks2
Psmd2	3.17016e-05	0.39715	0.554	0.242	0.548374	3	Psmd2
Prkcd	3.29256e-05	0.640218	0.714	0.417	0.569547	3	Prkcd
Noc2l	3.33212e-05	0.657035	0.268	0.09	0.57639	3	Noc2l
Sdf2l1	3.35119e-05	0.33832	0.304	0.102	0.57969	3	Sdf2l1
Hnrnpab	3.37131e-05	0.493486	0.625	0.311	0.583168	3	Hnrnpab
2810004N23Rik	3.59699e-05	0.373928	0.268	0.088	0.622207	3	2810004N23Rik
Uqcr10	3.62822e-05	0.486402	0.786	0.41	0.627609	3	Uqcr10
Utp18	3.69547e-05	0.452574	0.268	0.087	0.639242	3	Utp18
Marcksl1	4.00584e-05	0.505791	0.357	0.138	0.69293	3	Marcksl1
Ddx56	4.06392e-05	0.289479	0.268	0.085	0.702977	3	Ddx56
Ddx21	4.07714e-05	0.343191	0.446	0.179	0.705265	3	Ddx21
Rps261	4.20208e-05	0.34451	0.982	0.92	0.726875	3	Rps26
Pabpc11	4.24699e-05	0.522217	0.929	0.841	0.734645	3	Pabpc1
Wdr33	4.25999e-05	0.315226	0.554	0.238	0.736893	3	Wdr33
Prps2	4.32045e-05	0.380466	0.321	0.115	0.747351	3	Prps2
Polr2l	4.3541e-05	0.439624	0.304	0.108	0.753172	3	Polr2l
Gramd3	4.3956e-05	0.53113	0.321	0.123	0.760351	3	Gramd3
Stxbp21	4.47952e-05	0.433871	0.5	0.216	0.774867	3	Stxbp2
Parl	4.51561e-05	0.465271	0.286	0.097	0.781111	3	Parl
Exosc5	4.53993e-05	0.377571	0.429	0.174	0.785317	3	Exosc5
Eif3g	4.85255e-05	0.448281	0.518	0.235	0.839393	3	Eif3g
Tcerg1	4.91306e-05	0.363928	0.411	0.169	0.849861	3	Tcerg1
Mrpl30	4.93183e-05	0.376538	0.679	0.335	0.853109	3	Mrpl30
Snrpa	4.98878e-05	0.344977	0.518	0.225	0.862959	3	Snrpa
Mrpl23	4.99306e-05	0.545232	0.554	0.295	0.863699	3	Mrpl23
Sdad1	5.04687e-05	0.441825	0.286	0.099	0.873007	3	Sdad1
Sec61b	5.08223e-05	0.451857	0.875	0.621	0.879124	3	Sec61b
Med8	5.14503e-05	0.379751	0.357	0.134	0.889987	3	Med8
Brix1	5.22074e-05	0.409699	0.429	0.173	0.903083	3	Brix1
Cycs	5.35829e-05	0.708039	0.607	0.345	0.926877	3	Cycs
Cfl11	5.37614e-05	0.378353	0.982	0.903	0.929965	3	Cfl1
Anapc11	5.4135e-05	0.464527	0.589	0.276	0.936427	3	Anapc11
Caprin1	5.4728e-05	0.382849	0.554	0.248	0.946685	3	Caprin1
Idh3a	5.48896e-05	0.438883	0.357	0.136	0.94948	3	Idh3a
Prpf19	5.58885e-05	0.485392	0.536	0.24	0.96676	3	Prpf19
Timm23	5.63876e-05	0.404841	0.482	0.207	0.975393	3	Timm23
Txndc17	5.64486e-05	0.346777	0.446	0.184	0.976448	3	Txndc17
Taf7	5.75248e-05	0.371213	0.411	0.162	0.995064	3	Taf7
Ssr2	5.86254e-05	0.472705	0.5	0.231	1	3	Ssr2
Lsm3	5.91472e-05	0.485463	0.464	0.202	1	3	Lsm3
Alkbh1	6.09629e-05	0.545729	0.304	0.112	1	3	Alkbh1
Denr	6.11818e-05	0.582918	0.411	0.176	1	3	Denr
Rps27l1	6.28649e-05	0.516313	0.589	0.299	1	3	Rps27l
BC0350441	6.39844e-05	0.489507	0.554	0.26	1	3	BC035044
Ndufs4	6.43756e-05	0.473131	0.536	0.247	1	3	Ndufs4
Pgam1	6.4971e-05	0.395494	0.571	0.269	1	3	Pgam1
Dnttip2	6.53085e-05	0.263685	0.357	0.134	1	3	Dnttip2
Ythdf2	6.54686e-05	0.449996	0.446	0.192	1	3	Ythdf2
Cyb561a31	7.04866e-05	0.546668	0.768	0.454	1	3	Cyb561a3
Anapc161	7.1503e-05	0.415884	0.482	0.206	1	3	Anapc16
2410015M20Rik	7.19612e-05	0.507516	0.571	0.287	1	3	2410015M20Rik
Parvg1	7.33661e-05	0.422745	0.518	0.232	1	3	Parvg
Tomm20	7.37082e-05	0.530814	0.589	0.287	1	3	Tomm20
Traf2	7.48088e-05	0.278984	0.304	0.107	1	3	Traf2
Hnrnpf	7.89892e-05	0.405627	0.964	0.744	1	3	Hnrnpf
Nedd41	7.91974e-05	0.533297	0.446	0.203	1	3	Nedd4
Ier3ip1	8.08734e-05	0.461175	0.464	0.206	1	3	Ier3ip1
Ddx39	8.40686e-05	0.558246	0.589	0.295	1	3	Ddx39
Psmg2	8.62959e-05	0.277585	0.268	0.09	1	3	Psmg2
Morf4l2	8.74996e-05	0.302559	0.321	0.119	1	3	Morf4l2
Ubap2l1	8.80025e-05	0.430128	0.571	0.274	1	3	Ubap2l
Usmg5	9.04018e-05	0.481648	0.857	0.501	1	3	Usmg5
Gtf2h5	9.24322e-05	0.43173	0.554	0.269	1	3	Gtf2h5
Ppil1	9.49835e-05	0.345129	0.375	0.149	1	3	Ppil1
Aldoa	9.69282e-05	0.483743	0.875	0.61	1	3	Aldoa
Ctsz1	9.76737e-05	0.429096	0.875	0.532	1	3	Ctsz
Atp5o.1	0.000102655	0.488769	0.696	0.407	1	3	Atp5o.1
Noc4l	0.000104056	0.365682	0.286	0.102	1	3	Noc4l
Mettl16	0.000109053	0.33301	0.286	0.103	1	3	Mettl16
Nifk	0.000120786	0.281439	0.286	0.1	1	3	Nifk
Esf1	0.000125184	0.282571	0.304	0.112	1	3	Esf1
Naa15	0.000125331	0.273972	0.339	0.129	1	3	Naa15
Ruvbl1	0.000125417	0.389214	0.286	0.105	1	3	Ruvbl1
Cnbp	0.00012838	0.496097	0.893	0.661	1	3	Cnbp
Psma5	0.000131716	0.344491	0.589	0.286	1	3	Psma5
Pdap11	0.000135467	0.426385	0.5	0.228	1	3	Pdap1
Szrd1	0.000139835	0.360658	0.464	0.202	1	3	Szrd1
Higd1a	0.000140054	0.513054	0.446	0.203	1	3	Higd1a
Tkt	0.000143125	0.579867	0.661	0.405	1	3	Tkt
Fam162a	0.000143511	0.250565	0.268	0.092	1	3	Fam162a
Rpsa1	0.000148065	0.355637	0.982	0.936	1	3	Rpsa
Ccnh	0.000148564	0.32527	0.357	0.142	1	3	Ccnh
Tra2b	0.000150924	0.46436	0.786	0.465	1	3	Tra2b
Ebna1bp2	0.000151848	0.347789	0.411	0.171	1	3	Ebna1bp2
Atp5e	0.000152464	0.360288	0.964	0.802	1	3	Atp5e
Rpl10a1	0.000153746	0.369278	1	0.886	1	3	Rpl10a
Atp5g2	0.000156468	0.611349	0.911	0.711	1	3	Atp5g2
Lcp11	0.000157299	0.478433	0.893	0.566	1	3	Lcp1
Mrpl54	0.00015851	0.371205	0.518	0.247	1	3	Mrpl54
Cdc37	0.000158926	0.425871	0.714	0.376	1	3	Cdc37
Rpl7a	0.000159015	0.382594	0.982	0.867	1	3	Rpl7a
Trmt1	0.000164953	0.32698	0.339	0.133	1	3	Trmt1
Senp1	0.000168461	0.266058	0.357	0.139	1	3	Senp1
Pop5	0.000177395	0.320518	0.411	0.171	1	3	Pop5
Cdk4	0.000180168	0.514747	0.464	0.23	1	3	Cdk4
Swi51	0.000180192	0.391073	0.714	0.394	1	3	Swi5
Tardbp	0.000184971	0.432194	0.411	0.173	1	3	Tardbp
Dph3	0.000187335	0.405833	0.446	0.202	1	3	Dph3
Cdc5l	0.000196777	0.383536	0.554	0.269	1	3	Cdc5l
Psmd31	0.000197903	0.284886	0.446	0.186	1	3	Psmd3
Ndufc1	0.000203641	0.46427	0.607	0.327	1	3	Ndufc1
Elob	0.000204884	0.37139	0.893	0.605	1	3	Elob
Psmb4	0.00020892	0.440123	0.625	0.322	1	3	Psmb4
Zfp330	0.000209125	0.311989	0.286	0.105	1	3	Zfp330
Rps6ka1	0.000211803	0.436997	0.304	0.122	1	3	Rps6ka1
Nol12	0.000214348	0.251221	0.268	0.093	1	3	Nol12
Atp5h	0.000221932	0.4313	0.893	0.61	1	3	Atp5h
Myl12a1	0.000224292	0.489297	0.821	0.596	1	3	Myl12a
Tbc1d1	0.000224531	0.357537	0.446	0.202	1	3	Tbc1d1
Park7	0.000235548	0.650245	0.661	0.442	1	3	Park7
Lsm1	0.000239977	0.490309	0.375	0.166	1	3	Lsm1
Ndufb6	0.000247341	0.445214	0.554	0.276	1	3	Ndufb6
Nfkb2	0.000249752	0.437416	0.518	0.25	1	3	Nfkb2
Usp39	0.000254728	0.335926	0.321	0.129	1	3	Usp39
Eif4a3	0.000254755	0.444277	0.536	0.27	1	3	Eif4a3
Mrpl41	0.000256548	0.260979	0.375	0.153	1	3	Mrpl41
Cxcr51	0.000257399	0.383001	0.429	0.196	1	3	Cxcr5
Canx	0.000263438	0.366231	0.589	0.306	1	3	Canx
Eef1g	0.000276481	0.574968	0.804	0.572	1	3	Eef1g
Mthfsl	0.000280412	0.369959	0.286	0.11	1	3	Mthfsl
Samm50	0.00028283	0.319578	0.393	0.167	1	3	Samm50
Psmd9	0.000292165	0.487789	0.304	0.129	1	3	Psmd9
Rrp36	0.000297688	0.337364	0.304	0.118	1	3	Rrp36
Asna1	0.000302897	0.415801	0.393	0.168	1	3	Asna1
Cox6b1	0.000303513	0.429708	0.821	0.606	1	3	Cox6b1
Hspa4	0.000307738	0.401783	0.661	0.349	1	3	Hspa4
Ncf11	0.00031491	0.388409	0.607	0.319	1	3	Ncf1
Bola2	0.000326959	0.341812	0.464	0.21	1	3	Bola2
Polr2c	0.00032794	0.290282	0.411	0.177	1	3	Polr2c
Sumo3	0.000331934	0.384267	0.304	0.123	1	3	Sumo3
Dcps	0.000338025	0.33641	0.464	0.213	1	3	Dcps
Paics	0.000339068	0.479367	0.393	0.183	1	3	Paics
Nedd91	0.000341823	0.258158	0.554	0.274	1	3	Nedd9
Sp1101	0.000345161	0.472699	0.518	0.26	1	3	Sp110
Sin3b	0.000352176	0.417908	0.5	0.255	1	3	Sin3b
Dennd4b	0.000353387	0.482139	0.321	0.134	1	3	Dennd4b
Fubp1	0.000355826	0.401787	0.571	0.309	1	3	Fubp1
Cdkn2aipnl	0.000355853	0.31703	0.411	0.174	1	3	Cdkn2aipnl
Klhl14	0.000358267	0.281809	0.339	0.143	1	3	Klhl14
Taf1d	0.000366934	0.374035	0.339	0.146	1	3	Taf1d
Erh	0.00037814	0.523179	0.321	0.141	1	3	Erh
Ppid	0.00039437	0.310665	0.304	0.12	1	3	Ppid
Psme3	0.000407198	0.374549	0.321	0.129	1	3	Psme3
Smarcc2	0.00040783	0.311485	0.304	0.119	1	3	Smarcc2
Dhps	0.000408187	0.447767	0.304	0.124	1	3	Dhps
Ncf41	0.00041243	0.382383	0.768	0.454	1	3	Ncf4
Abce1	0.000417123	0.266565	0.304	0.118	1	3	Abce1
Ndufs6	0.000417135	0.406349	0.446	0.211	1	3	Ndufs6
Ezr	0.00042045	0.392393	0.821	0.538	1	3	Ezr
Tuba1b1	0.000430602	0.678597	0.357	0.166	1	3	Tuba1b
Eef1a11	0.000438766	0.306611	0.982	0.971	1	3	Eef1a1
Supt16	0.000444054	0.256898	0.429	0.196	1	3	Supt16
St13	0.000444219	0.312612	0.5	0.242	1	3	St13
Dbi	0.000447177	0.250167	0.5	0.228	1	3	Dbi
Lmnb1	0.000451939	0.453449	0.357	0.154	1	3	Lmnb1
Gspt1	0.000454549	0.284356	0.375	0.158	1	3	Gspt1
Mrps7	0.000461454	0.333878	0.464	0.208	1	3	Mrps7
Jtb	0.000481375	0.362948	0.536	0.269	1	3	Jtb
Pgd	0.000484653	0.275413	0.357	0.156	1	3	Pgd
Anp32a	0.000493297	0.430931	0.875	0.514	1	3	Anp32a
Impa1	0.000496448	0.399541	0.446	0.211	1	3	Impa1
Hnrnpdl	0.000496616	0.444038	0.571	0.307	1	3	Hnrnpdl
Twistnb	0.0005173	0.428743	0.446	0.217	1	3	Twistnb
Nr2c2ap	0.000524842	0.360484	0.321	0.134	1	3	Nr2c2ap
Edf1	0.000526662	0.410763	0.839	0.571	1	3	Edf1
Ndufa12	0.000536417	0.559998	0.482	0.251	1	3	Ndufa12
Atp5j21	0.000557695	0.47568	0.839	0.602	1	3	Atp5j2
Emc6	0.000561202	0.399634	0.536	0.267	1	3	Emc6
Napsa1	0.000588753	0.325865	0.964	0.747	1	3	Napsa
Snrpc	0.00059345	0.384747	0.589	0.304	1	3	Snrpc
Samsn1	0.000602142	0.349308	0.286	0.117	1	3	Samsn1
H2afz1	0.000613016	0.428458	0.804	0.565	1	3	H2afz
Mrpl21	0.000631468	0.332492	0.357	0.156	1	3	Mrpl21
Fus	0.000638549	0.324623	0.732	0.45	1	3	Fus
Trmt112	0.000643892	0.464567	0.804	0.605	1	3	Trmt112
Hnrnpr	0.000655103	0.37442	0.482	0.225	1	3	Hnrnpr
Nme1	0.000673113	0.271916	0.268	0.105	1	3	Nme1
Rps27a1	0.00069453	0.287207	0.982	0.932	1	3	Rps27a
Parp1	0.000707372	0.386389	0.679	0.404	1	3	Parp1
Ndufaf8	0.000725989	0.288086	0.393	0.172	1	3	Ndufaf8
Tagln2	0.000735108	0.428067	0.714	0.414	1	3	Tagln2
Ndufab1	0.000755281	0.404978	0.518	0.269	1	3	Ndufab1
Chmp2a	0.00075595	0.396105	0.482	0.245	1	3	Chmp2a
Gripap1	0.000773118	0.266946	0.375	0.168	1	3	Gripap1
Rrp1	0.000773788	0.371353	0.625	0.361	1	3	Rrp1
Eif2ak1	0.000779701	0.284255	0.339	0.144	1	3	Eif2ak1
Crtc2	0.000783241	0.351943	0.286	0.119	1	3	Crtc2
Atp5f11	0.000795877	0.351442	0.821	0.553	1	3	Atp5f1
Ptges31	0.00080162	0.389703	0.589	0.301	1	3	Ptges3
Scamp2	0.000804252	0.355516	0.482	0.242	1	3	Scamp2
Ndufa7	0.000810756	0.366446	0.786	0.498	1	3	Ndufa7
Tsfm	0.00081889	0.286406	0.268	0.105	1	3	Tsfm
Eif3a	0.000820594	0.309696	0.679	0.391	1	3	Eif3a
Cmtm6	0.000843356	0.392515	0.357	0.158	1	3	Cmtm6
Cops6	0.00086572	0.261977	0.571	0.272	1	3	Cops6
Chchd3	0.000868859	0.250679	0.393	0.178	1	3	Chchd3
Hmgn11	0.000875323	0.414353	0.839	0.567	1	3	Hmgn1
Ptbp1	0.000896572	0.337678	0.5	0.26	1	3	Ptbp1
Hsph1	0.000901671	0.45821	0.286	0.122	1	3	Hsph1
Rps181	0.000917535	0.424638	0.946	0.836	1	3	Rps18
Ndufc2	0.000931091	0.359003	0.571	0.299	1	3	Ndufc2
Tgif1	0.000972721	0.361804	0.268	0.109	1	3	Tgif1
Rpia	0.000994874	0.345523	0.446	0.22	1	3	Rpia
Dynlrb11	0.00100096	0.324158	0.571	0.305	1	3	Dynlrb1
Snrpb	0.00103284	0.360027	0.821	0.571	1	3	Snrpb
Rpl411	0.00104093	0.288191	0.982	0.951	1	3	Rpl41
Srsf11	0.00108515	0.317318	0.714	0.442	1	3	Srsf11
Edem1	0.00109748	0.258525	0.286	0.117	1	3	Edem1
Rps61	0.00110495	0.306986	0.982	0.801	1	3	Rps6
Nutf2	0.00111899	0.260929	0.375	0.168	1	3	Nutf2
Hypk	0.00112237	0.336337	0.375	0.176	1	3	Hypk
Slc25a39	0.0011269	0.443014	0.321	0.147	1	3	Slc25a39
Actg11	0.00113019	0.453861	0.982	0.89	1	3	Actg1
Itgb1bp1	0.00114265	0.393473	0.304	0.13	1	3	Itgb1bp1
Mrpl38	0.00115027	0.491083	0.321	0.146	1	3	Mrpl38
Cd1801	0.00116546	0.372875	0.554	0.304	1	3	Cd180
Gfer	0.00116599	0.307891	0.268	0.11	1	3	Gfer
Tdg	0.00119475	0.305599	0.268	0.11	1	3	Tdg
1810022K09Rik	0.00119485	0.37896	0.554	0.309	1	3	1810022K09Rik
Fam49b1	0.00122451	0.365411	0.75	0.467	1	3	Fam49b
Cstb	0.00122813	0.310808	0.464	0.227	1	3	Cstb
Htatsf1	0.0012297	0.31613	0.286	0.12	1	3	Htatsf1
Arl6ip1	0.00123066	0.309722	0.911	0.619	1	3	Arl6ip1
Ddx27	0.00123375	0.330764	0.339	0.158	1	3	Ddx27
Cox5b1	0.00128361	0.38261	0.821	0.612	1	3	Cox5b
Bag1	0.00135197	0.310392	0.446	0.215	1	3	Bag1
2021-09-07	0.00139185	0.367237	0.643	0.366	1	3	2021-09-07
Ly861	0.0013991	0.450034	0.893	0.607	1	3	Ly86
Polr2e	0.00140362	0.344023	0.571	0.306	1	3	Polr2e
Llph	0.00143042	0.448917	0.571	0.324	1	3	Llph
Ahsa1	0.00143235	0.275833	0.571	0.3	1	3	Ahsa1
Sptssa	0.0014674	0.447708	0.446	0.232	1	3	Sptssa
Polr2j1	0.00148901	0.294957	0.536	0.272	1	3	Polr2j
Rab7	0.00149123	0.350266	0.518	0.281	1	3	Rab7
Lsm71	0.00151524	0.358334	0.554	0.301	1	3	Lsm7
2310011J03Rik	0.00154076	0.268307	0.393	0.183	1	3	2310011J03Rik
Mrpl11	0.00155971	0.336545	0.286	0.127	1	3	Mrpl11
Pim21	0.00157372	0.36748	0.339	0.159	1	3	Pim2
Serbp1	0.00159505	0.472183	0.821	0.581	1	3	Serbp1
Mrpl12	0.00163378	0.477982	0.393	0.198	1	3	Mrpl12
Smarca5	0.00165473	0.338887	0.518	0.276	1	3	Smarca5
Farsa	0.00168801	0.280318	0.321	0.144	1	3	Farsa
Abracl	0.00169033	0.403263	0.589	0.341	1	3	Abracl
Psmd7	0.00170431	0.361253	0.464	0.236	1	3	Psmd7
Atp5k	0.0017057	0.353423	0.607	0.334	1	3	Atp5k
Fundc2	0.00173293	0.28268	0.393	0.189	1	3	Fundc2
Psmc5	0.00180813	0.262711	0.554	0.289	1	3	Psmc5
Uqcrfs1	0.00190511	0.369589	0.714	0.449	1	3	Uqcrfs1
Get4	0.001913	0.312683	0.304	0.138	1	3	Get4
Phb2	0.0019294	0.447257	0.625	0.404	1	3	Phb2
Ogdh	0.00195458	0.339019	0.375	0.187	1	3	Ogdh
Atxn7l3b	0.00195683	0.31669	0.607	0.33	1	3	Atxn7l3b
Atp6v1b2	0.00203418	0.379663	0.411	0.207	1	3	Atp6v1b2
Polr2g	0.00207066	0.40037	0.482	0.262	1	3	Polr2g
Nfyb	0.00210499	0.260981	0.357	0.167	1	3	Nfyb
Suclg1	0.00212591	0.264702	0.429	0.215	1	3	Suclg1
Exosc8	0.00213355	0.277642	0.268	0.112	1	3	Exosc8
Babam2	0.0022055	0.333344	0.286	0.127	1	3	Babam2
Psmd14	0.00225716	0.311027	0.429	0.215	1	3	Psmd14
Selenos	0.00228926	0.554586	0.464	0.252	1	3	Selenos
Tmem1231	0.00238564	0.470638	0.75	0.481	1	3	Tmem123
Ubfd1	0.00243826	0.318107	0.268	0.114	1	3	Ubfd1
Srebf2	0.00243869	0.286025	0.304	0.141	1	3	Srebf2
Tpi1	0.00250139	0.393133	0.357	0.178	1	3	Tpi1
Nedd81	0.00250497	0.36191	0.786	0.565	1	3	Nedd8
Ddx54	0.00252503	0.537237	0.589	0.374	1	3	Ddx54
Cacybp	0.00253318	0.333733	0.571	0.325	1	3	Cacybp
Naa50	0.00259197	0.611702	0.268	0.123	1	3	Naa50
Cyfip21	0.0026863	0.252748	0.696	0.439	1	3	Cyfip2
Dpp3	0.002754	0.344173	0.304	0.141	1	3	Dpp3
Gm8186	0.00276136	0.45444	0.304	0.147	1	3	Gm8186
Rps151	0.00279346	0.370741	0.946	0.799	1	3	Rps15
Colgalt1	0.00280084	0.264141	0.411	0.206	1	3	Colgalt1
Mphosph10	0.00289358	0.28474	0.321	0.149	1	3	Mphosph10
Eml4	0.00291424	0.253121	0.482	0.269	1	3	Eml4
Rad23a	0.00292639	0.418515	0.304	0.153	1	3	Rad23a
Vps4b	0.00293972	0.251563	0.446	0.226	1	3	Vps4b
Nop56	0.00296969	0.360954	0.339	0.166	1	3	Nop56
Mat2a	0.00301999	0.259673	0.5	0.27	1	3	Mat2a
Cct71	0.00305432	0.311045	0.607	0.356	1	3	Cct7
Pole4	0.00306606	0.341606	0.5	0.275	1	3	Pole4
Pfdn1	0.00306886	0.275962	0.375	0.186	1	3	Pfdn1
Prkar1a	0.00308034	0.276429	0.679	0.408	1	3	Prkar1a
Ube2a1	0.00308289	0.303745	0.5	0.266	1	3	Ube2a
Dcaf12	0.00308605	0.287365	0.518	0.263	1	3	Dcaf12
Vdac2	0.00316108	0.268171	0.714	0.4	1	3	Vdac2
Coa3	0.00334618	0.309153	0.5	0.261	1	3	Coa3
Ccdc124	0.00356032	0.275493	0.429	0.22	1	3	Ccdc124
Eprs	0.00357091	0.270301	0.321	0.156	1	3	Eprs
Usp16	0.00366243	0.406913	0.357	0.174	1	3	Usp16
Eif3d	0.0037158	0.256039	0.536	0.304	1	3	Eif3d
Prpf8	0.00376648	0.28872	0.482	0.267	1	3	Prpf8
Polr2k	0.00382401	0.296159	0.482	0.256	1	3	Polr2k
Gtf3c6	0.00399711	0.484518	0.304	0.152	1	3	Gtf3c6
Psmb31	0.004028	0.285131	0.875	0.56	1	3	Psmb3
Atxn101	0.00403711	0.27529	0.375	0.188	1	3	Atxn10
Sec61g	0.004103	0.269208	0.893	0.614	1	3	Sec61g
Mrpl28	0.00418993	0.305524	0.393	0.198	1	3	Mrpl28
Capza2	0.00419348	0.358094	0.732	0.452	1	3	Capza2
Ube2i1	0.00432961	0.364086	0.893	0.567	1	3	Ube2i
Bcar3	0.00433668	0.442742	0.286	0.136	1	3	Bcar3
Srp19	0.00441221	0.325234	0.464	0.25	1	3	Srp19
Lsm6	0.00442941	0.252531	0.518	0.292	1	3	Lsm6
Tomm5	0.00451948	0.307016	0.482	0.263	1	3	Tomm5
Kpnb1	0.00466596	0.263061	0.321	0.159	1	3	Kpnb1
Gstp11	0.00467219	0.362399	0.607	0.353	1	3	Gstp1
Pet100	0.00472352	0.305655	0.446	0.238	1	3	Pet100
Rbm8a	0.00476346	0.469661	0.429	0.248	1	3	Rbm8a
Sf3b3	0.00477413	0.447683	0.464	0.248	1	3	Sf3b3
Fam104a	0.00477764	0.346381	0.429	0.237	1	3	Fam104a
Mdh11	0.00483148	0.279978	0.768	0.503	1	3	Mdh1
Nfatc1	0.00483857	0.431099	0.268	0.128	1	3	Nfatc1
Ndufa1	0.00488401	0.457229	0.625	0.35	1	3	Ndufa1
Gltp	0.00490936	0.276779	0.357	0.183	1	3	Gltp
Eif4e	0.00491503	0.445263	0.321	0.162	1	3	Eif4e
Mrpl51	0.00508088	0.258025	0.375	0.187	1	3	Mrpl51
Me2	0.0051181	0.255073	0.304	0.141	1	3	Me2
Psmd11	0.00513361	0.406506	0.464	0.276	1	3	Psmd11
2010107E04Rik	0.0053069	0.341641	0.786	0.555	1	3	2010107E04Rik
Ms4a11	0.00531022	0.270834	0.964	0.747	1	3	Ms4a1
Hspa51	0.00537858	0.317965	0.732	0.518	1	3	Hspa5
Akr1b3	0.00555854	0.327505	0.571	0.353	1	3	Akr1b3
Mrps14	0.0055895	0.300945	0.571	0.338	1	3	Mrps14
Uchl3	0.00565572	0.36329	0.429	0.252	1	3	Uchl3
Emg1	0.00572874	0.257245	0.679	0.413	1	3	Emg1
Puf60	0.00573289	0.319442	0.661	0.42	1	3	Puf60
Psmd12	0.00576088	0.256002	0.393	0.208	1	3	Psmd12
Pdrg1	0.00588924	0.308099	0.357	0.181	1	3	Pdrg1
Hprt	0.00602675	0.283079	0.375	0.198	1	3	Hprt
Exosc4	0.00604847	0.305725	0.286	0.133	1	3	Exosc4
Vcp1	0.00616346	0.271797	0.643	0.383	1	3	Vcp
Tufm	0.00625839	0.322558	0.429	0.238	1	3	Tufm
Eif4g1	0.00633392	0.394189	0.482	0.29	1	3	Eif4g1
Dhx15	0.00636521	0.320125	0.5	0.281	1	3	Dhx15
Bzw11	0.00650488	0.274026	0.661	0.42	1	3	Bzw1
Pou2f21	0.00653874	0.308564	0.768	0.533	1	3	Pou2f2
Trappc5	0.00667142	0.330532	0.446	0.251	1	3	Trappc5
Psma4	0.00674536	0.348512	0.446	0.25	1	3	Psma4
Etf1	0.006845	0.335601	0.286	0.136	1	3	Etf1
Dmac1	0.0069843	0.326369	0.339	0.182	1	3	Dmac1
Pkib1	0.00724214	0.263235	0.375	0.196	1	3	Pkib
Jpt1	0.00781097	0.257275	0.821	0.55	1	3	Jpt1
Dad11	0.00781246	0.258977	0.732	0.455	1	3	Dad1
Prrc2a	0.0078204	0.400346	0.482	0.284	1	3	Prrc2a
Fnbp4	0.0080736	0.269751	0.339	0.176	1	3	Fnbp4
Tpm3	0.0080852	0.255439	0.875	0.646	1	3	Tpm3
Nars	0.00809087	0.254535	0.321	0.164	1	3	Nars
Dusp21	0.00823287	0.37685	0.696	0.478	1	3	Dusp2
Alkbh7	0.00834777	0.288274	0.268	0.129	1	3	Alkbh7
Skp1a1	0.00853856	0.257686	0.679	0.434	1	3	Skp1a
Snrpd2	0.0087253	0.27019	0.625	0.393	1	3	Snrpd2
Yipf4	0.00905883	0.281658	0.446	0.242	1	3	Yipf4
Ndufb4	0.00915434	0.297714	0.536	0.332	1	3	Ndufb4
2210016F16Rik	0.00949282	0.419388	0.286	0.156	1	3	2210016F16Rik
Cops9	0.00949776	0.26308	0.518	0.294	1	3	Cops9
Rac21	0.00973156	0.261719	0.946	0.876	1	3	Rac2
Rpl51	0.00982016	0.314974	0.964	0.806	1	3	Rpl5
Ndufb7	0.00993517	0.379411	0.607	0.373	1	3	Ndufb7
Malat1	2.76921e-18	2.41146	1	0.996	4.79018e-14	4	Malat1
Gm26917	3.01679e-14	2.97114	0.774	0.315	5.21845e-10	4	Gm26917
Ptprc1	8.91088e-13	2.01977	0.871	0.64	1.5414e-08	4	Ptprc
Gm16867	4.96977e-11	2.11341	0.387	0.075	8.59671e-07	4	Gm16867
Cd551	1.74945e-08	2.41691	0.645	0.326	0.00030262	4	Cd55
Cmah1	2.41461e-08	2.54995	0.548	0.223	0.000417679	4	Cmah
mt-Co3	2.47609e-08	1.05905	0.968	0.99	0.000428314	4	mt-Co3
St6gal1	5.38184e-08	2.60025	0.581	0.27	0.000930951	4	St6gal1
mt-Cytb	1.52352e-07	0.96885	0.968	0.989	0.00263538	4	mt-Cytb
Grap2	1.8109e-07	2.18949	0.387	0.113	0.0031325	4	Grap2
Gm38394	2.4983e-07	1.76517	0.258	0.05	0.00432156	4	Gm38394
Arhgap451	3.79156e-07	1.56441	0.774	0.701	0.00655865	4	Arhgap45
Cd371	4.62805e-07	0.861533	1	0.965	0.00800561	4	Cd37
mt-Co1	4.72113e-07	0.71237	0.968	0.993	0.00816661	4	mt-Co1
Macf11	4.93768e-07	2.64961	0.581	0.308	0.00854119	4	Macf1
Xpr1	1.0437e-06	1.80553	0.29	0.069	0.0180539	4	Xpr1
Ikzf31	2.14143e-06	1.68349	0.742	0.692	0.0370425	4	Ikzf3
Mdm4	3.52269e-06	2.19029	0.387	0.136	0.0609355	4	Mdm4
Fchsd21	3.78984e-06	2.50421	0.516	0.259	0.0655566	4	Fchsd2
Zufsp	6.98974e-06	2.06263	0.452	0.195	0.120908	4	Zufsp
mt-Nd2	6.99065e-06	1.51941	0.839	0.864	0.120924	4	mt-Nd2
mt-Nd4l	7.6804e-06	1.16709	0.903	0.956	0.132856	4	mt-Nd4l
Malt1	9.73968e-06	1.9849	0.484	0.234	0.168477	4	Malt1
Traf3ip3	2.26077e-05	2.0487	0.516	0.294	0.391067	4	Traf3ip3
Mbnl1	2.5814e-05	1.72966	0.645	0.495	0.44653	4	Mbnl1
Adcy7	4.1293e-05	1.74831	0.323	0.111	0.714286	4	Adcy7
Ralgps2	5.06348e-05	1.90679	0.677	0.628	0.87588	4	Ralgps2
Trim7	6.47423e-05	2.11276	0.258	0.075	1	4	Trim7
mt-Nd1	6.60216e-05	1.33261	0.839	0.906	1	4	mt-Nd1
Nsd1	7.89791e-05	1.95211	0.516	0.319	1	4	Nsd1
Ash1l	8.27799e-05	2.01329	0.484	0.274	1	4	Ash1l
Ighd1	8.65869e-05	1.71465	0.581	0.375	1	4	Ighd
Lyst	8.72083e-05	2.05153	0.258	0.078	1	4	Lyst
Hbb-bs	9.24082e-05	1.33002	0.677	0.566	1	4	Hbb-bs
Tet3	9.31439e-05	1.56776	0.355	0.142	1	4	Tet3
Chd2	0.000101671	2.14011	0.452	0.241	1	4	Chd2
Etnk1	0.000158063	1.76061	0.452	0.246	1	4	Etnk1
Msi2	0.000189697	1.61753	0.355	0.152	1	4	Msi2
Tmem245	0.000191047	1.90726	0.258	0.083	1	4	Tmem245
A430078G23Rik	0.000208008	1.82837	0.419	0.214	1	4	A430078G23Rik
Bank11	0.000225829	1.60243	0.613	0.523	1	4	Bank1
Pag1	0.000227151	2.06958	0.355	0.153	1	4	Pag1
Slc12a61	0.000229694	1.82715	0.419	0.218	1	4	Slc12a6
Fus1	0.000232503	1.62635	0.581	0.465	1	4	Fus
Rcsd11	0.000286538	1.42673	0.581	0.446	1	4	Rcsd1
mt-Atp6	0.000375145	1.02639	0.968	0.985	1	4	mt-Atp6
Atf7ip	0.000504819	1.85694	0.484	0.315	1	4	Atf7ip
Hivep2	0.00053726	1.6126	0.258	0.091	1	4	Hivep2
Son	0.000563507	0.952871	0.71	0.734	1	4	Son
Lpp	0.000628113	1.70683	0.258	0.092	1	4	Lpp
Srcap	0.00067653	1.79259	0.258	0.094	1	4	Srcap
Phip1	0.000684527	1.98586	0.484	0.332	1	4	Phip
Napsa2	0.000906702	1.03177	0.71	0.763	1	4	Napsa
Kcnq1ot1	0.00111375	1.80906	0.355	0.176	1	4	Kcnq1ot1
Tnrc6b	0.00114385	1.9003	0.419	0.248	1	4	Tnrc6b
Zfp62	0.00119502	1.64031	0.258	0.1	1	4	Zfp62
Tmem131l1	0.00132509	1.5556	0.516	0.391	1	4	Tmem131l
Dock2	0.00140162	1.60218	0.484	0.353	1	4	Dock2
R3hdm1	0.0014271	1.81614	0.29	0.125	1	4	R3hdm1
mt-Co2	0.00148163	0.836193	0.935	0.99	1	4	mt-Co2
Siglecg1	0.00169835	0.928377	0.71	0.788	1	4	Siglecg
Hectd1	0.00178618	1.849	0.419	0.266	1	4	Hectd1
Lrrk21	0.00178634	1.6344	0.323	0.157	1	4	Lrrk2
Foxp11	0.00187034	1.07192	0.677	0.752	1	4	Foxp1
Bdp1	0.00198687	1.8673	0.323	0.161	1	4	Bdp1
Akap13	0.0022088	1.34774	0.548	0.451	1	4	Akap13
Smg6	0.00221436	1.84181	0.323	0.162	1	4	Smg6
Glg1	0.00225929	1.60246	0.355	0.191	1	4	Glg1
Slc9a7	0.00237183	1.7869	0.29	0.133	1	4	Slc9a7
Dmxl11	0.00302055	1.40769	0.387	0.231	1	4	Dmxl1
Rlf	0.0034651	1.42708	0.29	0.137	1	4	Rlf
Hba-a1	0.00401083	1.36471	0.516	0.394	1	4	Hba-a1
2021-03-11	0.00421665	1.74438	0.323	0.173	1	4	2021-03-01
Arhgap15	0.00435255	1.83528	0.419	0.292	1	4	Arhgap15
Pcm1	0.00442334	1.60135	0.323	0.172	1	4	Pcm1
Zcchc7	0.00532843	1.89388	0.323	0.176	1	4	Zcchc7
Nktr	0.00539813	1.60808	0.355	0.21	1	4	Nktr
Dgkd1	0.00542136	1.53391	0.516	0.448	1	4	Dgkd
Myo1e	0.00544986	1.70716	0.355	0.21	1	4	Myo1e
Ktn1	0.00643945	1.94779	0.355	0.219	1	4	Ktn1
Hnrnph11	0.00668876	1.68298	0.419	0.308	1	4	Hnrnph1
Mef2c1	0.00679271	1.50368	0.581	0.569	1	4	Mef2c
Chst3	0.00775574	1.39983	0.452	0.352	1	4	Chst3
Birc6	0.00819037	1.70174	0.387	0.262	1	4	Birc6
Rnf111	0.00891111	1.59157	0.29	0.155	1	4	Rnf111
Tmem167	0.00910973	0.292117	0.065	0.307	1	4	Tmem167
Mkl1	0.00991327	1.6128	0.258	0.128	1	4	Mkl1
