# Supplementary material for: The meningeal transcriptional response to traumatic brain injury and aging
Source: eLife. 2023 Jan 3;12:e81154. doi: 10.7554/eLife.81154 (PMC9810333; doi:10.7554/eLife.81154)
Supplement: Figure 4—source data 4. [file elife-81154-fig4-data4.xlsx]

## Sheet: Sheet1
Lymphocyte Activation	Survival	AR	Cell Adhesion	CS	Immune Breaks	Proteasome	Inflammatory Response
Ppia	Gimap1	Cd247	Fermt3	Il2rg	Cfl1	Psma3	Il2rg
Il2rg	Gimap6	Trgv2	Adgre5	Mif	Socs1	Psme2	Mif
Adgre5	Arrb2		Itgb1		Prdx6	Psmb3	Fermt3
Mif			Selplg		Txnip	Psmb8	Adgre5
Arrb2					Cish	Sem1	Itgb1
Lat					Cd52		Selplg
Cd48							Cd247
							Trgv2
							Ppia
							Arrb2
							Lat
							Cd48
							Gimap1
							Gimap6
