# Supplementary material for: The meningeal transcriptional response to traumatic brain injury and aging
Source: eLife. 2023 Jan 3;12:e81154. doi: 10.7554/eLife.81154 (PMC9810333; doi:10.7554/eLife.81154)
Supplement: Figure 4—source data 5. [file elife-81154-fig4-data5.xlsx]

## Sheet: Sheet1
	baseMean	log2FoldChange	lfcSE	stat	pvalue	padj	response
Rpl7	4.92514	-0.105062	0.0570113	7.25991	0.00705109	0.0176166	down
Stk17b	1.06109	-0.155759	0.140827	5.75734	0.0164199	0.0355879	down
Sf3b1	1.85996	-0.0479795	0.149511	77.7156	1.18995e-18	4.10931e-17	down
Eef1b2	2.09866	-0.148711	0.0830073	13.4424	0.000246002	0.00102765	down
Rpl37a	9.01935	-0.226127	0.0647395	13.6648	0.000218512	0.00092778	down
Ncl	0.998296	-0.0575978	0.141053	9.2624	0.00233907	0.00700369	down
Cd55	1.2626	-0.301258	0.221402	35.335	2.77598e-09	2.61447e-08	down
Btg2	1.10833	-0.229725	0.153943	29.0521	7.04582e-08	5.44737e-07	down
Ptprc	2.63566	-0.289769	0.133501	78.5401	7.83925e-19	2.90052e-17	down
Tpr	1.10893	-0.0389249	0.147616	27.265	1.77398e-07	1.2588e-06	down
Ralgps2	2.46796	-0.456078	0.152468	99.6426	1.82533e-23	2.3638e-21	down
4930523C07Rik	1.24138	-0.336602	0.170234	55.0329	1.18529e-13	1.91868e-12	down
Sell	0.786341	-0.379327	0.276787	18.9357	1.35197e-05	7.61216e-05	down
Atp1b1	0.897761	-0.644422	0.298647	19.8159	8.52693e-06	4.85379e-05	down
Ifi203	1.11177	-0.0433112	0.171765	25.9628	3.48052e-07	2.43636e-06	down
H3f3a	11.0366	-0.0646011	0.0489424	10.9936	0.000914264	0.00316612	down
Rpl12	3.32295	-0.0877348	0.0803404	9.03762	0.0026448	0.00774014	down
Rpl35	7.17708	-0.047433	0.0567585	14.6013	0.000132821	0.000598271	down
Cytip	1.30309	-0.0225517	0.132899	19.9447	7.97138e-06	4.63952e-05	down
Pdia3	0.961116	-0.0296237	0.142921	18.7274	1.50802e-05	8.31014e-05	down
Dusp2	1.27284	-0.211519	0.158284	10.9544	0.0009338	0.00320337	down
Rbm39	3.36396	-0.246341	0.0951135	95.6015	1.40498e-22	1.45556e-20	down
Scand1	1.08401	-0.230192	0.119799	7.84439	0.00509788	0.0135421	down
Samhd1	1.46342	-0.220822	0.132014	40.6748	1.79792e-10	2.11664e-09	down
Serinc3	1.40867	-0.268884	0.132696	39.5503	3.19722e-10	3.52375e-09	down
Pkig	1.39765	-0.0127669	0.126634	21.2749	3.97917e-06	2.39675e-05	down
Gnas	1.05378	-0.280019	0.125298	14.0951	0.000173799	0.000762949	down
Rpl10	6.70343	-0.0895395	0.0525053	24.8363	6.24114e-07	4.25383e-06	down
Msn	2.12409	-0.228718	0.100424	15.986	6.38112e-05	0.000308918	down
Tmsb4x	20.2195	-0.00966159	0.0476928	13.3755	0.000254935	0.00105645	down
Rpl22l1	1.29634	-0.162848	0.112017	6.18616	0.0128753	0.0292045	down
Rps27	12.0044	-0.169539	0.0704779	8.33284	0.00389347	0.0107278	down
Mcl1	0.918282	-0.080454	0.148059	19.8446	8.40004e-06	4.83469e-05	down
Txnip	1.24374	-0.232036	0.143966	14.8409	0.000116969	0.000536196	down
Cd2	0.83523	-0.0817184	0.168409	7.21824	0.00721662	0.017801	down
Rpl34	9.56465	-0.0111173	0.0548574	8.09575	0.00443691	0.0121604	down
Bank1	2.13478	-0.119603	0.148269	76.4268	2.28525e-18	7.39849e-17	down
Lyn	1.9337	-0.100412	0.113897	28.4959	9.38973e-08	7.0491e-07	down
Rps20	13.8446	-0.0200323	0.060228	5.17162	0.0229588	0.0459412	down
Dnaja1	1.20806	-0.310097	0.137139	5.17073	0.0229706	0.0459412	down
Clta	1.76648	-0.0629592	0.0903811	9.17079	0.00245909	0.00732073	down
Pax5	1.36971	-0.329855	0.150963	48.5719	3.18396e-12	4.45755e-11	down
Laptm5	2.09556	-0.00494058	0.108808	14.1917	0.000165093	0.000737226	down
Sh3bgrl3	3.55129	-0.156449	0.0709109	16.7924	4.17006e-05	0.000209718	down
Rsrp1	2.44889	-0.118382	0.112547	55.2659	1.05281e-13	1.75921e-12	down
Kmt2e	1.2931	-0.114099	0.142393	39.5034	3.27487e-10	3.53413e-09	down
Rpl9	10.3089	-0.0469687	0.0512062	5.97795	0.0144859	0.0322046	down
Rplp0	7.77417	-0.0902551	0.0556117	15.7175	7.35415e-05	0.000349491	down
Hvcn1	1.49656	-0.0228418	0.121463	10.7564	0.00103917	0.0034954	down
Ubc	1.48964	-0.225934	0.106476	7.04218	0.00796122	0.019181	down
Actb	26.0393	-0.120337	0.0423081	12.3448	0.000442207	0.00172228	down
Arpc1b	2.07156	-0.0972194	0.0842967	7.24551	0.00710786	0.0176166	down
Gimap1	1.43084	-0.184585	0.132163	32.8608	9.89986e-09	8.27117e-08	down
Tax1bp1	1.08132	-0.223689	0.134448	37.5637	8.84746e-10	8.81343e-09	down
Foxp1	3.03125	-0.367166	0.134279	90.8828	1.52436e-21	1.12803e-19	down
Arpc4	0.873492	-0.00662147	0.118182	5.68136	0.017146	0.03655	down
Rpl32	8.6786	-0.104207	0.0572559	14.6052	0.00013255	0.000598271	down
Grcc10	1.14009	-0.259518	0.114858	5.1778	0.0228773	0.0459412	down
Chd4	1.12986	-0.389216	0.187552	56.2412	6.41049e-14	1.10688e-12	down
H2afj	0.841188	-0.210708	0.136919	5.70277	0.0169382	0.036414	down
Rps9	9.6813	-0.296626	0.0505886	41.5591	1.14361e-10	1.44039e-09	down
Rpl28	7.7142	-0.116416	0.0510893	18.5955	1.61605e-05	8.8117e-05	down
Rps5	9.10347	-0.042389	0.0636752	7.98049	0.00472841	0.0128911	down
Rps19	9.08558	-0.250444	0.0560749	27.4867	1.58181e-07	1.13802e-06	down
Cd79a	19.4363	-0.138445	0.0488414	9.92515	0.00163036	0.00511833	down
Arhgef1	1.76888	-0.185496	0.149188	71.2079	3.21499e-17	8.76508e-16	down
Pou2f2	1.6152	-0.160656	0.125696	21.4835	3.5688e-06	2.17487e-05	down
Pafah1b3	1.11611	-0.0846269	0.151893	8.56109	0.00343423	0.00966811	down
Cox6b1	0.941258	-0.0546145	0.110554	8.88348	0.00287763	0.00828118	down
Siglecg	3.14309	-0.121844	0.113045	68.442	1.30665e-16	3.38421e-15	down
Napsa	3.08599	-0.206731	0.0879217	30.5512	3.25169e-08	2.63184e-07	down
Rps11	9.22905	-0.133335	0.0570571	13.2928	0.000266426	0.00108668	down
Cd37	8.65884	-0.126455	0.0720852	72.1813	1.96304e-17	5.64918e-16	down
Cib1	0.972091	-0.0171446	0.13876	7.37665	0.00660763	0.0168608	down
Iqgap1	1.82384	-0.135709	0.128666	67.9212	1.70163e-16	4.00656e-15	down
Hbb-bt	0.64468	-2.42573	0.343666	68.096	1.55727e-16	3.84126e-15	down
Rpl27a	8.24088	-0.120982	0.0577943	14.1459	0.000169167	0.000748963	down
Swap70	1.56943	-0.0403944	0.153128	54.7471	1.37083e-13	2.15179e-12	down
Rps13	8.83036	-0.0653274	0.0513301	10.3956	0.00126319	0.00416771	down
Rps15a	11.5613	-0.175131	0.0596671	15.5159	8.18123e-05	0.000385261	down
Gga2	1.08447	-0.0518568	0.1299	9.41255	0.00215506	0.00652818	down
Fus	1.24342	-0.364023	0.184132	75.5978	3.47746e-18	1.0596e-16	down
Rps12	5.62798	-0.0280651	0.0708221	10.2012	0.00140351	0.00454228	down
Cnn2	1.2398	-0.169509	0.112156	6.48973	0.0108499	0.0250904	down
Arhgap45	2.53479	-0.0959086	0.133323	67.2713	2.36599e-16	5.32863e-15	down
Hsp90b1	2.50319	-0.0912499	0.122979	29.9836	4.35716e-08	3.47232e-07	down
Atp5b	1.25053	-0.109137	0.0994368	6.65741	0.00987445	0.0232498	down
Rpl41	14.8081	-0.0102338	0.0450698	8.89123	0.00286544	0.00828118	down
Rps26	9.68254	-0.0451722	0.0500043	23.9627	9.8218e-07	6.35962e-06	down
Fam129c	1.12944	-0.179513	0.173814	18.1183	2.07591e-05	0.000112013	down
Klf2	3.58385	-0.200294	0.094348	7.62383	0.0057602	0.0150696	down
Cox4i1	1.88595	-0.096161	0.0806813	7.14834	0.00750333	0.0183336	down
Irf8	1.58324	-0.129745	0.120689	6.54567	0.010514	0.0244226	down
Rpl13	13.4571	-0.0408397	0.0575921	5.09867	0.0239441	0.0475213	down
Rpl15	4.78645	-0.0743771	0.0583773	17.7599	2.50611e-05	0.000133832	down
Blk	1.19704	-0.375512	0.146628	37.1046	1.11958e-09	1.09423e-08	down
Lcp1	1.84246	-0.249773	0.118108	13.8132	0.000201918	0.000871612	down
Tpt1	9.12133	-0.310193	0.0572753	41.0341	1.49593e-10	1.80207e-09	down
Ets1	1.18035	-0.208858	0.158591	39.4552	3.35666e-10	3.54847e-09	down
Rps25	1.95777	-0.0747522	0.0830135	9.73636	0.00180658	0.00550477	down
Rplp1	7.89811	-0.112768	0.0643701	8.64518	0.00327928	0.00933333	down
Rpl4	2.28979	-0.295836	0.0854898	16.3669	5.21895e-05	0.000255039	down
Ctsh	0.850012	-0.118059	0.151894	8.95146	0.00277247	0.00806821	down
Rpl29	4.98416	-0.0137642	0.0650106	6.90743	0.00858383	0.0204904	down
Rpsa	10.626	-0.0135212	0.0642089	5.15851	0.0231327	0.0460874	down
Lars2	6.60327	-0.732459	0.157235	27.8866	1.28636e-07	9.385e-07	down
Bcl11a	1.09353	-0.249918	0.157047	40.212	2.27844e-10	2.56572e-09	down
Ebf1	8.28195	-0.567962	0.121691	54.6175	1.46427e-13	2.23086e-12	down
Cyfip2	0.912484	-0.299629	0.175548	41.8911	9.64991e-11	1.24966e-09	down
Rack1	3.39883	-0.125034	0.0692764	7.85856	0.00505806	0.0135055	down
Tnfrsf13b	0.966957	-0.339906	0.124394	8.80541	0.00300339	0.00859535	down
Rpl26	5.13834	-0.162237	0.0641011	10.4872	0.00120206	0.00401722	down
Pfn1	9.222	-0.0440852	0.0524753	15.7235	7.3307e-05	0.000349491	down
Rpl23	10.382	-0.0594992	0.0561879	9.14854	0.00248917	0.00736793	down
Rpl19	10.8554	-0.0588126	0.0505933	10.8264	0.00100063	0.00338776	down
Ikzf3	2.52809	-0.335369	0.132346	100.891	9.71819e-24	1.67801e-21	down
Rpl27	3.39532	-0.0105689	0.0649003	5.68375	0.0171227	0.03655	down
Limd2	2.7457	-0.116734	0.0816352	5.02294	0.0250136	0.0494544	down
H3f3b	6.10642	-0.129564	0.0638138	11.469	0.000707676	0.00256347	down
Syk	2.16204	-0.232186	0.149617	91.9628	8.83191e-22	7.62488e-20	down
Mef2c	2.3932	-0.215374	0.154001	62.7228	2.37943e-15	4.93019e-14	down
Rps23	4.76904	-0.273001	0.0686714	24.3756	7.92664e-07	5.33246e-06	down
Zfp36l1	1.58394	-0.0408166	0.122279	8.40609	0.00373966	0.0104148	down
Eif5	0.80704	-0.0685796	0.152068	13.1431	0.000288587	0.00116788	down
Pld4	1.1081	-0.198868	0.143682	6.44702	0.0111138	0.0255865	down
Ighd	1.51211	-0.347607	0.204105	32.9529	9.44212e-09	8.01806e-08	down
Ighm	9.41547	-0.181776	0.0900511	38.3723	5.84563e-10	5.93732e-09	down
Ly6e	11.965	-0.0281004	0.0502461	7.90528	0.00492907	0.0132293	down
Myh9	1.46642	-0.45213	0.133397	33.8408	5.98099e-09	5.43536e-08	down
Rac2	3.68469	-0.0467495	0.0643177	12.5417	0.000397966	0.00156172	down
Apobec3	2.4728	-0.241645	0.114356	58.7819	1.76156e-14	3.25889e-13	down
Iglc1	1.99631	-0.317351	0.142159	5.25398	0.0218967	0.0448319	down
Cd47	1.30742	-0.247287	0.123088	17.0415	3.65713e-05	0.000185725	down
Son	2.60532	-0.121269	0.13299	106.418	5.97123e-25	1.59754e-22	down
Srrm2	2.08102	-0.237386	0.132673	106.354	6.16813e-25	1.59754e-22	down
Rps10	10.2736	-0.0306554	0.0532431	10.374	0.001278	0.00418988	down
Rpl10a	5.09963	-0.109669	0.0630825	10.8623	0.000981443	0.00334465	down
Srsf3	1.21757	-0.147433	0.122322	21.1193	4.31567e-06	2.56956e-05	down
Rps18	4.21962	-0.195961	0.0780024	18.7767	1.46952e-05	8.18507e-05	down
H2-DMa	1.02472	-0.312797	0.133618	6.30525	0.0120381	0.0275917	down
H2-Ab1	5.56776	-0.259287	0.127609	5.25834	0.0218418	0.0448319	down
Ltb	2.95041	-0.337515	0.131483	6.58388	0.0102906	0.0241201	down
Ddx39b	0.843269	-0.041034	0.145343	10.3514	0.00129377	0.00421492	down
Gm26917	3.07886	-2.10677	0.315877	51.1307	8.64147e-13	1.27894e-11	down
Gm42418	80.6445	-0.525432	0.110186	22.6003	1.99452e-06	1.27551e-05	down
Ccnd3	0.908876	-0.11742	0.169771	28.7073	8.41874e-08	6.4131e-07	down
Myl12b	2.17309	-0.0977404	0.0822955	6.56077	0.0104251	0.0243253	down
Rps14	5.37336	-0.180765	0.0621097	11.2484	0.000796937	0.00284699	down
Rpl17	7.65694	-0.0947119	0.0618556	7.19819	0.0072977	0.0179157	down
Malat1	63.5619	-1.02478	0.145276	47.0695	6.85149e-12	9.33966e-11	down
Rasgrp2	0.972296	-0.133896	0.141195	7.35082	0.0067032	0.0170209	down
Ms4a1	7.74724	-0.0467188	0.0860669	5.96814	0.0145667	0.0322458	down
mt-Co1	28.6663	-0.211059	0.107632	21.6095	3.34185e-06	2.06081e-05	down
mt-Co2	19.9735	-0.280954	0.106846	38.8305	4.62257e-10	4.78898e-09	down
mt-Atp6	21.189	-0.528671	0.11436	48.8128	2.81591e-12	4.05178e-11	down
mt-Co3	26.0499	-0.165476	0.109123	24.2608	8.41343e-07	5.51666e-06	down
mt-Nd4l	10.2045	-0.0531168	0.115666	65.6229	5.46013e-16	1.17848e-14	down
mt-Cytb	19.178	-0.26096	0.107505	41.518	1.16788e-10	1.44039e-09	down
mt-Nd2	6.10909	0.0175427	0.131458	87.3419	9.12947e-21	5.91133e-19	up
mt-Nd4	3.90144	0.0623697	0.133462	84.5906	3.67e-20	2.11229e-18	up
mt-Atp8	1.72869	0.574546	0.200103	83.3339	6.93004e-20	3.58976e-18	up
mt-Nd1	7.10086	0.199113	0.125577	81.8518	1.46684e-19	6.9075e-18	up
Ube2d3	1.53737	0.049301	0.136089	80.1298	3.50598e-19	1.51342e-17	up
mt-Nd5	2.83644	0.249109	0.14816	78.6239	7.51352e-19	2.90052e-17	up
Ddx5	2.75198	0.163497	0.104587	62.0313	3.38046e-15	6.73492e-14	up
Ttr	0.598939	1.78905	0.261868	59.131	1.47519e-14	2.83018e-13	up
Mndal	1.12013	0.168183	0.159157	57.4475	3.47118e-14	6.20024e-13	up
Morf4l1	1.59711	0.0577834	0.105904	42.6462	6.55905e-11	8.71176e-10	up
Unc93b1	2.95835	0.0385664	0.0950734	40.498	1.96818e-10	2.2656e-09	up
H2-D1	7.55405	0.262899	0.0634416	36.368	1.63366e-09	1.56711e-08	up
Hnrnpa2b1	3.68983	0.0786528	0.0790604	34.0382	5.40416e-09	4.99885e-08	up
Cd19	2.1403	0.0461933	0.0964867	33.5454	6.96189e-09	6.21769e-08	up
Snx2	1.46251	0.139119	0.108329	33.4689	7.24142e-09	6.35772e-08	up
Blnk	1.37814	0.101005	0.121185	33.0671	8.90315e-09	7.68638e-08	up
Sp100	1.65899	0.0252871	0.124534	30.5671	3.22524e-08	2.63184e-07	up
Tra2b	0.943603	0.219762	0.14582	29.2566	6.34009e-08	4.97601e-07	up
Tmbim6	1.57494	0.0655867	0.102454	28.0193	1.20113e-07	8.88839e-07	up
Tpm3	1.52787	0.0167876	0.103499	25.8294	3.72965e-07	2.57594e-06	up
Hnrnpu	1.27679	0.00813131	0.134955	24.2976	8.25424e-07	5.48166e-06	up
Actr3	2.09029	0.0610471	0.0889849	21.819	2.99623e-06	1.88308e-05	up
Clec2d	1.04334	0.283788	0.160177	21.8055	3.01729e-06	1.88308e-05	up
Dok3	1.24018	0.391089	0.138501	21.0797	4.40569e-06	2.59335e-05	up
H2-K1	5.81122	0.111753	0.0784809	17.6019	2.72314e-05	0.000143937	up
Gdi2	1.13926	0.0533093	0.119514	17.4105	3.01165e-05	0.000157579	up
Rps4x	11.9346	0.0200824	0.0475601	17.2765	3.23157e-05	0.000167396	up
Zfp36	1.03851	0.281787	0.147509	17.1392	3.47372e-05	0.000178157	up
Tgfb1	1.15969	0.179602	0.145401	16.7156	4.34232e-05	0.000216281	up
Psap	2.1878	0.172673	0.104841	16.455	4.9819e-05	0.000245774	up
H2-Q7	0.686936	0.25828	0.189622	15.2844	9.24778e-05	0.000431563	up
Id3	0.888488	0.631519	0.164197	14.9138	0.000112539	0.000520495	up
Prkcd	0.815953	0.0322268	0.161097	14.0376	0.000179191	0.000780007	up
Ldha	0.67689	0.456856	0.137512	13.7641	0.000207257	0.000887265	up
Rpl39	9.05257	0.0447749	0.0586112	13.5255	0.000235348	0.000991139	up
Dynll1	1.91416	0.305728	0.0908797	13.3536	0.000257933	0.00106039	up
Hnrnpa3	2.00321	0.155785	0.0946842	12.9495	0.000320014	0.00128502	up
Hnrnpk	1.81624	0.211284	0.0881741	12.8325	0.000340644	0.00135734	up
Il2rg	1.31867	0.202912	0.114862	12.5837	0.000389115	0.00153864	up
Ighv14-4	0.0651194	18.0781	71.9755	12.2884	0.000455793	0.00176195	up
Smim14	1.35019	0.0590571	0.113974	12.1257	0.000497305	0.0019019	up
Psme2	0.749739	0.168212	0.137516	12.1181	0.00049934	0.0019019	up
Rpl14	3.31138	3.56632e-05	0.0749402	11.8936	0.000563259	0.0021297	up
Dbnl	0.989861	0.266406	0.125481	11.8255	0.000584244	0.00219303	up
Junb	0.660992	0.43598	0.177527	11.8012	0.000591939	0.00220593	up
Cst3	1.34612	0.189344	0.133525	11.6655	0.000636708	0.00235582	up
Pgls	1.04131	0.162649	0.138963	11.5778	0.000667427	0.00245197	up
Ubb	7.00771	0.163701	0.0480508	11.5486	0.000678001	0.00247327	up
Tcf3	1.29293	0.181103	0.129408	11.3418	0.000757827	0.00272607	up
Serbp1	1.16523	0.0879173	0.117451	11.1651	0.000833508	0.00291728	up
Cnbp	1.36408	0.314744	0.100856	11.1711	0.000830802	0.00291728	up
Fam49b	0.896748	0.19984	0.128832	11.1783	0.000827593	0.00291728	up
Rpl38	6.47944	0.207692	0.0689693	10.9884	0.00091683	0.00316612	up
Gapdh	0.995735	0.0349616	0.11466	10.4561	0.00122245	0.00405914	up
Dnajc7	2.41537	0.264643	0.140561	10.1903	0.00141179	0.00454228	up
Rpl37	9.80202	0.108034	0.0532614	10.0866	0.00149354	0.00477564	up
Lrmp	1.09956	0.155032	0.154587	10.0429	0.00152939	0.00486028	up
Slc25a5	1.10394	0.260372	0.106574	9.93468	0.00162194	0.00511833	up
Arhgdia	1.20245	0.0247765	0.109587	9.85329	0.00169528	0.00529009	up
Rpl3	3.99547	0.0623847	0.0730312	9.81458	0.00173134	0.00537026	up
Hmgb1	1.59845	0.208782	0.100622	9.76402	0.00177961	0.00545465	up
Ppia	6.69418	0.0877289	0.0626656	9.76523	0.00177843	0.00545465	up
Eif5a	1.66599	0.221701	0.0984621	9.29904	0.00229274	0.00690488	up
Eif3i	0.568337	0.275141	0.147149	9.09416	0.00256427	0.00754711	up
Cd52	8.9994	0.0763982	0.0688487	8.63319	0.00330094	0.00934364	up
Cd79b	12.5324	0.0100171	0.0531707	8.41612	0.00371909	0.0104134	up
Apoe	0.417939	0.956512	0.353537	8.34206	0.00387377	0.0107278	up
Sec61b	1.03657	0.0089792	0.106152	7.93164	0.00485778	0.0131693	up
Actg1	6.26156	0.163408	0.0786451	7.9229	0.00488129	0.0131693	up
Rps3	7.62039	0.0387172	0.0513373	7.78839	0.00525832	0.013897	up
Rps27a	9.70258	0.055637	0.0510667	7.6567	0.00565619	0.0148726	up
Rpl7a	3.49263	0.0942556	0.0660276	7.58668	0.00588012	0.015306	up
Sdc4	0.875723	0.272228	0.14979	7.50778	0.00614331	0.0159112	up
Rpl22	5.00642	0.0561095	0.0660386	7.45133	0.00633896	0.0163362	up
Cd72	2.11816	0.0135936	0.13903	7.39145	0.00655345	0.0168054	up
Mdh1	0.743482	0.192632	0.130961	7.28658	0.00694717	0.0175543	up
Atp5g1	0.598356	0.230711	0.147252	7.27736	0.0069829	0.0175589	up
Rpl6	7.80544	0.123449	0.0510689	7.25195	0.0070824	0.0176166	up
Uqcrh	1.53401	0.239803	0.0984966	7.13685	0.00755158	0.0183649	up
Cd83	0.350855	0.739518	0.280088	7.06021	0.00788149	0.0190776	up
B2m	3.1109	0.171521	0.0755501	6.94837	0.00838955	0.0201194	up
Gpx1	2.42287	0.227422	0.0871566	6.79636	0.00913437	0.0217046	up
Itm2b	2.14334	0.105228	0.0870049	6.70259	0.0096273	0.0227714	up
Rpl21	11.0165	0.0216577	0.0553244	6.26446	0.0123184	0.0281098	up
Atp5g2	1.50369	0.106314	0.0969166	6.18128	0.0129109	0.0292045	up
Rps2	6.53863	0.0643276	0.0745932	6.16221	0.0130508	0.0293927	up
Hcls1	0.879041	0.000723953	0.134627	6.09456	0.0135598	0.0304069	up
Myl12a	1.01196	0.0843741	0.109242	6.01706	0.0141682	0.0316342	up
Rpl24	4.21649	0.00319533	0.067988	5.96023	0.0146322	0.032253	up
Rps8	15.0604	0.0943224	0.0452004	5.92181	0.0149546	0.032824	up
Elob	1.0563	0.194321	0.107022	5.87895	0.0153229	0.0334906	up
Ctss	1.45276	0.121726	0.108925	5.81902	0.0158538	0.0345053	up
Pkm	0.929905	0.150141	0.126125	5.70241	0.0169417	0.036414	up
Rpl5	2.51434	0.160825	0.0808351	5.59753	0.0179858	0.0381831	up
Erp29	1.37215	0.112968	0.108974	5.57929	0.0181741	0.0384252	up
Rps7	9.70654	0.00521166	0.0526993	5.56387	0.0183349	0.0386075	up
Hck	1.12232	0.287045	0.140602	5.4055	0.0200734	0.0420972	up
Gm42031	2.32861	0.247604	0.123135	5.36347	0.0205628	0.0429497	up
Rpl36	6.64027	0.0213748	0.0687001	5.34342	0.0208006	0.043272	up
Serp1	1.83361	0.201014	0.0906147	5.31614	0.0211287	0.0437788	up
Arpc5l	1.63054	0.0479055	0.104077	5.27805	0.0215959	0.0445685	up
Ybx1	1.33744	0.0758036	0.106255	5.24646	0.0219915	0.0448487	up
2010309G21Rik	0.547964	0.164403	0.252515	5.20534	0.0225176	0.0457416	up
Ezr	1.26869	0.10975	0.114015	5.19444	0.0226592	0.0458496	up
Ptpn18	0.99141	-0.0837133	0.122702	0.464625	0.495471	0.554103	X
Cox5b	1.06249	0.0258861	0.110948	0.465166	0.49522	0.554103	X
Rpl31	1.60927	0.0884987	0.0960323	3.12211	0.0772368	0.122726	X
Stat1	0.577415	0.0795096	0.207806	2.97686	0.0844627	0.129443	X
Hspe1	1.01574	-0.0473834	0.127173	4.60123	0.0319491	0.0608443	X
Arpc2	2.09248	-0.0253321	0.0798353	0.383598	0.535684	0.586648	X
Ptma	8.34169	0.0157633	0.0604013	0.0953616	0.757469	0.784737	X
Fcmr	2.84784	-0.0628745	0.105268	3.72127	0.0537235	0.0910058	X
Snrpe	0.955269	-0.0968895	0.113553	2.07001	0.150221	0.211452	X
Arpc5	1.31728	-0.0109139	0.102473	0.858222	0.354237	0.418937	X
Fcrla	1.65496	0.0294614	0.121252	3.45028	0.063241	0.103667	X
Tagln2	0.869679	0.00942701	0.159968	0.159151	0.689939	0.7264	X
Atp5c1	1.0324	0.0136754	0.113008	0.0261484	0.871538	0.886949	X
Vim	1.91498	0.175714	0.13171	1.91228	0.166711	0.230899	X
Hspa5	1.3803	0.107548	0.147661	3.72825	0.0534993	0.0910058	X
Atp5g3	1.35951	-0.0201465	0.0973191	4.00386	0.0453962	0.08165	X
Nop10	0.763255	0.22564	0.135581	4.06278	0.0438382	0.0793993	X
Serf2	2.92796	0.0558939	0.0677001	1.74767	0.18617	0.247907	X
Snx5	0.793535	-0.193744	0.137111	2.00935	0.156332	0.218275	X
Ctsz	1.06132	-0.0372676	0.112023	0.451708	0.501525	0.558688	X
Atp5e	2.2365	-0.0300386	0.0780302	4.22848	0.039751	0.0730177	X
Rps21	8.73913	-0.00840569	0.0662029	3.82866	0.0503832	0.0869949	X
Ppdpf	1.03974	-0.0719432	0.11924	0.575332	0.448148	0.511323	X
Rbm3	1.45699	0.11279	0.107637	1.37794	0.240452	0.30603	X
Cfp	0.462622	0.313177	0.23523	3.38807	0.0656699	0.106636	X
Rpl36a	3.49047	0.105814	0.0805276	4.26805	0.0388356	0.0718458	X
Tsc22d3	1.27534	-0.245053	0.150615	3.45517	0.0630542	0.103667	X
Rps3a1	13.9769	0.0173796	0.0363409	1.75068	0.185791	0.247907	X
Pmf1	0.487875	-0.114682	0.189191	1.03015	0.310124	0.376217	X
S100a11	1.14627	-0.0250025	0.116762	3.85539	0.0495865	0.0864843	X
S100a10	1.29333	0.033641	0.115156	0.58844	0.443023	0.506592	X
Phgdh	0.261105	0.239637	0.257428	1.0664	0.30176	0.369531	X
Cd53	1.21555	0.0136159	0.115423	3.83431	0.0502136	0.0869949	X
H2afz	0.930237	0.026354	0.125806	3.54873	0.059591	0.0993744	X
Gng5	1.25847	0.0146079	0.100023	0.0295704	0.863469	0.882203	X
Anp32b	0.699145	0.134267	0.138506	1.30797	0.252762	0.317024	X
Rps6	2.74343	-0.0695516	0.0790539	3.06123	0.0801809	0.126242	X
Prdx1	0.786306	0.0782876	0.12654	1.60983	0.204516	0.268201	X
Rpl11	7.62588	0.000465325	0.0493265	1.77182	0.183157	0.247907	X
Cdc42	1.84652	0.1516	0.0849482	4.55248	0.032871	0.0621431	X
Capzb	1.31028	-0.021044	0.0983791	2.73838	0.097964	0.14582	X
Eno1	0.651525	-0.130187	0.147629	2.25246	0.133403	0.19142	X
Park7	0.645299	-0.04431	0.143442	0.630389	0.427213	0.491769	X
Plac8	0.866296	-0.116878	0.169522	1.60151	0.205689	0.269058	X
Cox6a1	0.85196	-0.0562901	0.121383	0.638393	0.424293	0.489496	X
Ddx54	0.562966	-0.0883053	0.170563	0.314352	0.575022	0.623141	X
Aldh2	0.792311	-0.0124	0.124952	2.17175	0.140566	0.200588	X
Arpc3	1.68459	-0.0278841	0.0855019	1.47688	0.224263	0.288847	X
Ran	0.964969	0.212375	0.117635	3.95792	0.0466512	0.0830423	X
Chchd2	0.995576	0.076924	0.114193	0.505615	0.477043	0.538363	X
Gnb2	1.16037	0.0119335	0.109743	0.271015	0.602652	0.650361	X
Atp5j2	1.08294	0.062579	0.110728	0.494184	0.482067	0.542849	X
Sem1	1.37797	0.0289692	0.101596	2.0993	0.147367	0.208569	X
Ndufa4	1.18891	0.179708	0.102146	3.35054	0.067183	0.107742	X
Gimap6	1.03785	0.0452146	0.144117	2.60884	0.10627	0.155502	X
Igkv2-137	0.434811	1.09173	1.31067	0.698625	0.403246	0.470198	X
Igkv1-135	2.69141	0.0500029	1.04786	0.00240998			X
Igkv17-127	1.05628	-0.681185	1.3543	0.247046	0.619163	0.664029	X
Igkv14-126	0.526854	-0.753708	2.7949	0.0707369			X
Igkv1-122	0.576635	-0.296433	2.82789	0.0109235			X
Igkv17-121	0.673192	-3.096	1.13008	5.86277			X
Igkv9-120	1.80944	-1.56165	1.46345	1.04613			X
Igkv1-117	2.89645	-0.463786	1.1729	0.154315			X
Igkv2-112	0.289695	-0.134012	2.62299	0.0026366			X
Igkv14-111	0.424536	-0.4716	1.68917	0.0771187			X
Igkv1-110	1.35123	-0.841967	1.25324	0.438227			X
Igkv2-109	0.550071	0.0381486	0.902292	0.00250326			X
Igkv16-104	0.201609	-1.75577	2.75792	0.372746			X
Igkv15-103	0.474349	-0.761741	1.89793	0.157209			X
Igkv10-96	1.03323	-1.12216	1.05302	1.08973	0.296531	0.363988	X
Igkv10-94	0.268531	-0.0799934	2.59758	0.00102325			X
Igkv19-93	1.54337	0.364139	0.797987	0.212849			X
Igkv4-91	0.18892	-19.3595	80.9804	6.76435			X
Igkv13-85	0.359072	0.206238	1.65094	0.0158695			X
Igkv13-84	0.216871	-0.654108	1.46092	0.202696	0.652554	0.69267	X
Igkv4-80	0.136363	-18.8977	80.9767	8.18762			X
Igkv4-72	0.262957	-0.209997	1.66475	0.0169284	0.89648	0.906986	X
Igkv4-68	0.122514	-1.81699	2.28393	0.583962			X
Igkv4-59	0.209076	0.107559	1.94091	0.0033093			X
Igkv4-57	0.310306	0.43005	1.91289	0.0515164			X
Igkv4-55	0.258543	0.920622	1.85531	0.250899			X
Igkv4-50	0.141298	1.29759	2.12147	0.371007			X
Igkv5-48	0.967886	0.088661	1.30806	0.00486207			X
Igkv12-46	1.07144	-0.128048	1.1983	0.0115846			X
Igkv5-45	0.12018	2.53265	1.69221	2.21635			X
Igkv12-44	1.96717	-1.47924	1.02294	1.95288			X
Igkv5-43	0.431109	0.964133	1.46958	0.43909	0.507562	0.562117	X
Igkv12-41	0.271243	1.08829	2.89162	0.14334			X
Igkv6-32	0.400673	-0.155774	1.86514	0.00694732			X
Igkv8-30	0.66031	-0.387137	1.4519	0.0708555			X
Igkv8-28	0.482141	0.802453	1.44079	0.315007			X
Igkv8-27	0.584257	0.480381	1.94916	0.0617008			X
Igkv8-24	0.888226	1.19284	1.39492	0.738847			X
Igkv6-23	0.721059	1.22883	1.78361	0.478788			X
Igkv8-21	0.240131	1.49669	2.92502	0.262625			X
Igkv6-17	0.905425	1.95929	2.00162	0.940686	0.332102	0.398214	X
Igkv6-15	1.57203	-1.13898	1.33442	0.693897	0.404842	0.470198	X
Igkv3-12	1.17257	0.134085	1.81736	0.00548685			X
Igkv3-10	0.545757	0.77862	2.35221	0.11053			X
Igkv3-7	0.503195	0.247667	2.171	0.0132284			X
Igkv3-5	0.369135	0.210251	2.45064	0.00746701			X
Igkv3-4	0.67494	1.51469	2.58182	0.343415			X
Igkv3-2	0.901365	1.04062	1.49861	0.487074			X
Gm30211	2.35977	-0.028911	0.181028	0.979109	0.322419	0.389308	X
Igkc	5.13645	-0.0778935	0.0955091	0.729752	0.392964	0.460532	X
Capg	1.01122	0.0815206	0.125431	1.12828	0.288142	0.355375	X
Tmsb10	18.2145	-0.0380504	0.0428516	2.87855	0.0897665	0.135962	X
Snrpg	0.810491	0.134939	0.131084	1.18174	0.277002	0.343271	X
Hnrnpf	1.84712	0.0716792	0.0838201	0.75551	0.384737	0.452941	X
Ptpn6	2.65145	0.011629	0.0852956	1.75346	0.185442	0.247907	X
Ccnd2	0.466239	-0.0410492	0.277202	0.240603	0.623771	0.667589	X
Arhgdib	4.01094	-0.0939456	0.0628295	2.78869	0.0949315	0.142123	X
Selenow	1.68401	-0.0229963	0.092192	1.7554	0.185199	0.247907	X
Rps16	11.98	-0.0577068	0.0516512	4.17641	0.0409904	0.0750284	X
Gmfg	0.782915	-0.133488	0.189129	3.38193	0.0659148	0.1067	X
Eif3k	1.16854	0.100364	0.103938	1.82881	0.176269	0.240282	X
Map4k1	0.793846	0.115995	0.129352	0.86344	0.352778	0.418167	X
Nfkbid	0.455176	0.827536	0.460299	3.66238	0.0556541	0.0936	X
Spib	2.17151	0.0161128	0.111852	2.07079	0.150144	0.211452	X
Il4i1	0.533941	0.161549	0.285269	0.392055	0.531221	0.583201	X
Rpl13a	1.23463	-0.00225812	0.113728	0.00461852	0.945818	0.953178	X
Ftl1	4.69488	-0.0648698	0.0712293	3.79984	0.0512575	0.0882107	X
Rpl18	8.77826	0.0368006	0.04942	0.598115	0.439298	0.50456	X
Rps17	1.55003	-0.161788	0.0970159	3.97365	0.0462174	0.0825538	X
Ucp2	3.65344	-0.105411	0.085714	1.96704	0.160763	0.223258	X
Hbb-bs	3.28598	-2.09627	0.197229	116.159			X
Eif3f	2.82083	-0.0153485	0.071551	0.142578	0.705732	0.741519	X
Arl6ip1	1.31662	-0.00153189	0.104351	4.42892	0.0353348	0.0665579	X
Coro1a	5.59106	-0.098763	0.0584261	3.19719	0.0737648	0.11757	X
Ypel3	1.15872	-0.0422447	0.127548	4.06467	0.0437892	0.0793993	X
Aldoa	1.35367	0.12606	0.106374	2.66206	0.102768	0.151426	X
Sept1	0.996909	-0.0256899	0.119545	1.0624	0.302669	0.36977	X
Taldo1	0.915371	0.153675	0.116852	3.87679	0.0489582	0.0856769	X
Rplp2	5.36544	-0.0429648	0.0666583	3.01154	0.0826735	0.128218	X
Lsp1	2.8111	0.147425	0.0769495	4.31405	0.0377989	0.0706852	X
Cd81	1.05483	0.171469	0.120505	4.35622	0.0368741	0.0692058	X
Cd24a	3.3538	0.0147278	0.116102	2.62452	0.105224	0.154409	X
Srgn	1.72699	-0.0499269	0.107816	1.34094	0.246868	0.312659	X
Mif	0.737641	0.156644	0.160328	3.70657	0.0541987	0.0914493	X
Chchd10	1.84744	-0.0624176	0.134646	0.705096	0.401077	0.468979	X
Vpreb3	4.63356	0.0686913	0.132393	0.356449	0.550485	0.601485	X
Gpx4	0.878462	-0.0262258	0.125819	0.0975891	0.754742	0.78348	X
Atp5d	1.11201	-0.0348137	0.103966	3.76873	0.0522193	0.0892726	X
Rps15	2.37229	0.146358	0.0882296	2.84754	0.0915136	0.138204	X
Oaz1	4.17893	0.0168695	0.0580601	0.18912	0.66365	0.701573	X
Eef2	5.02959	0.0599761	0.0580688	1.86798	0.171707	0.235926	X
Slc25a3	1.36488	-0.00594114	0.102309	1.20753	0.271823	0.339287	X
Btg1	2.85548	-0.0718448	0.0823159	3.03176	0.0816495	0.127442	X
Nap1l1	0.81973	-0.0863373	0.146774	3.35218	0.067116	0.107742	X
Cct2	0.668126	-0.198396	0.142738	2.065	0.150715	0.211573	X
Naca	3.08351	0.0369925	0.0673629	2.98802	0.0838826	0.128935	X
Myl6	2.04911	0.0413316	0.0810304	0.514407	0.473237	0.535233	X
Fcer2a	0.815607	-0.0110344	0.218581	1.26367	0.260957	0.326512	X
Ndufa13	0.996895	0.0546246	0.116953	0.994198	0.318719	0.385739	X
Uba52	1.29567	0.21769	0.108055	4.02637	0.0447942	0.080848	X
Rpl18a	11.7197	-0.00106254	0.0597831	2.75241	0.0971079	0.144962	X
Calr	0.763673	-0.120925	0.153475	1.72078	0.189593	0.251818	X
Cyba	3.11924	-0.0412364	0.0734534	0.489815	0.48401	0.543855	X
Rps24	18.4507	-0.0106362	0.0635469	3.5414	0.0598548	0.0993744	X
Rnase6	1.04084	-0.0554815	0.129552	2.32903	0.126981	0.183284	X
Psme1	1.35436	0.214357	0.105924	4.84996	0.0276467	0.0538731	X
Nedd8	0.91727	0.0929457	0.117541	1.11944	0.29004	0.356866	X
Tmem123	0.936687	0.0525753	0.136947	1.49395	0.221605	0.286978	X
Ubl5	1.18742	-0.0622967	0.107977	1.61583	0.203674	0.267775	X
Acp5	0.649712	-0.197201	0.153955	3.24538	0.071625	0.114512	X
Hspa8	5.26135	0.0429484	0.0810435	0.54724	0.459448	0.520774	X
Atp5l	1.23677	-0.061153	0.106603	0.679083	0.409903	0.47395	X
Pou2af1	0.962379	0.180091	0.127394	3.01324	0.0825869	0.128218	X
Cox5a	0.778478	0.0944278	0.126302	3.90391	0.0481739	0.0848778	X
Csk	1.40868	-0.0244387	0.102248	1.41814	0.23371	0.298918	X
Anp32a	0.8615	0.207497	0.121209	3.83285	0.0502575	0.0869949	X
Ppib	0.961425	0.0787841	0.112605	1.97221	0.160213	0.223093	X
Eef1a1	16.9598	-0.0378026	0.0523084	4.23686	0.0395551	0.0729166	X
Cox7a2	0.812033	-0.0265193	0.12414	0.5494	0.458563	0.520774	X
Gnai2	1.1892	-0.0174326	0.11326	0.337137	0.561487	0.61103	X
Rhoa	2.19946	-0.104322	0.0785425	3.54414	0.059756	0.0993744	X
Shisa5	2.12626	-0.0878029	0.151694	3.72013	0.0537602	0.0910058	X
Tma7	0.993759	-0.0122562	0.112924	0.162476	0.686887	0.724659	X
Cmtm7	1.13036	0.0666162	0.119013	4.57484	0.0324448	0.0615619	X
Sec61g	1.13071	0.120962	0.108222	1.50521	0.219871	0.285447	X
Hba-a1	2.0946	-2.37916	0.249266	103.103			X
Hba-a2	1.57386	-2.20363	0.255119	85.9047			X
Npm1	1.65009	0.0358196	0.103554	4.28053	0.0385512	0.0718328	X
Hint1	0.782642	0.204572	0.134311	2.33945	0.126134	0.183018	X
Rnf187	0.705839	0.185913	0.142395	2.70653	0.0999382	0.147908	X
Arf1	1.00312	0.0856986	0.113981	0.687086	0.407157	0.471829	X
Eif4a1	0.886929	0.151487	0.132792	2.23504	0.134913	0.193053	X
Gabarap	1.35148	0.114271	0.101549	1.39014	0.238381	0.304141	X
Ywhae	0.734793	0.211987	0.135657	2.708	0.0998463	0.147908	X
Rpl23a	1.48436	-0.104614	0.100712	2.66002	0.102899	0.151426	X
Lgals9	0.650495	0.246761	0.16213	2.36657	0.12396	0.180368	X
Slfn2	1.11577	-0.0517098	0.151424	3.48422	0.0619566	0.102209	X
Wfdc21	0.295936	-0.469649	0.36807	1.86952	0.17153	0.235926	X
Nme2	0.462442	0.150327	0.177627	3.10683	0.0779644	0.123503	X
Ccr7	0.819689	-0.0880448	0.185012	0.438476	0.507859	0.562117	X
Eif1	4.41819	0.0231804	0.0587866	1.03145	0.309818	0.376217	X
Cnp	1.9938	0.0908235	0.105453	0.747737	0.387194	0.454799	X
Grn	0.406706	0.262304	0.220712	1.47397	0.22472	0.288847	X
Atp5h	1.07286	0.0905588	0.108033	1.64107	0.200179	0.264434	X
Sumo2	1.51529	0.156972	0.0932024	3.91971	0.047723	0.0843704	X
Mif4gd	0.673568	0.183537	0.14877	1.76485	0.184021	0.247907	X
Serpinb1a	1.0236	-0.196722	0.149491	1.77599	0.182642	0.247907	X
Ly86	1.48581	-0.0815378	0.107987	3.77414	0.0520508	0.0892726	X
Txndc5	0.833177	0.0873812	0.142595	0.391692	0.531411	0.583201	X
Nol7	0.993324	0.0400636	0.1169	0.124056	0.724676	0.759883	X
Cox7c	1.32879	0.0668022	0.099505	1.47875	0.22397	0.288847	X
Nsa2	1.3191	-0.0608746	0.106494	0.407685	0.523147	0.577804	X
Btf3	2.06074	0.0122318	0.0801922	2.81164	0.0935824	0.140509	X
Nfkbia	1.48554	0.131052	0.120708	3.03221	0.0816265	0.127442	X
Rps29	7.71343	0.000193366	0.0667689	2.93915	0.086456	0.131718	X
Calm1	3.13667	0.0947865	0.0730422	2.28936	0.130264	0.187435	X
Ifi27l2a	2.25917	0.272367	0.176391	3.0017	0.083177	0.128563	X
Hsp90aa1	0.962047	-0.208108	0.145161	2.05688	0.15152	0.212128	X
2010107E04Rik	0.891106	0.0257472	0.118115	3.5264	0.0603986	0.0999568	X
Crip1	3.64119	-0.179091	0.116351	3.03113	0.0816811	0.127442	X
Ighv2-2	0.453663	-1.30026	1.16329	1.18238	0.276873	0.343271	X
Ighv5-4	0.370698	-1.49014	1.63427	0.761867			X
Ighv2-9-1	0.212502	-0.639266	1.93995	0.106743			X
Ighv5-17	0.336698	1.12406	1.54271	0.538688			X
Ighv4-1	0.191185	0.383082	1.78096	0.0463833	0.829481	0.850833	X
Ighv14-2	0.157217	0.26258	1.45429	0.037479	0.846493	0.866568	X
Ighv14-3	0.0904211	2.80252	2.08665	1.73167			X
Ighv9-1	0.239238	-2.15251	2.07261	0.96623	0.325622	0.392261	X
Ighv9-3	0.710575	-1.2547	1.23983	0.973237			X
Ighv7-3	0.352058	-0.465986	2.9167	0.0250651			X
Ighv3-6	0.996907	1.84237	1.02752	3.0799	0.0792653	0.125181	X
Ighv13-2	0.187108	-0.207456	2.0581	0.0100095			X
Ighv6-3	0.748833	0.899841	1.32981	0.462754	0.49634	0.554103	X
Ighv6-6	0.308666	0.772974	1.53334	0.26013	0.610031	0.655594	X
Ighv1-5	0.212353	1.67671	1.66906	1.02077			X
Ighv10-3	0.118718	1.65478	1.61106	1.05239	0.304958	0.37169	X
Ighv1-9	0.558434	1.38059	1.02099	1.86104	0.172505	0.236395	X
Ighv1-15	0.29034	-0.471177	1.89786	0.0611617			X
Ighv1-18	0.290085	0.322567	1.00504	0.116833	0.732495	0.764985	X
Ighv1-19	0.266066	-0.587422	1.66213	0.122847			X
Ighv1-22	0.192815	-0.0746159	1.58771	0.00430442	0.94769	0.95321	X
Ighv1-26	0.69441	0.0176876	0.759299	0.00587108	0.938924	0.948075	X
Ighv1-39	0.0712028	-1.53489	1.90322	0.642521			X
Ighv1-52	0.150659	2.18427	1.62852	1.75347	0.185441	0.247907	X
Ighv1-53	0.244133	0.0192985	1.16985	0.00264432	0.958988	0.962706	X
Ighv1-54	0.160097	-3.14922	2.58471	1.21462			X
Ighv1-55	0.128103	-0.863771	1.66246	0.264558	0.607006	0.653699	X
Ighv8-8	0.630113	-0.527203	1.49263	0.122	0.726876	0.76065	X
Ighv1-59	0.147661	0.605391	2.1546	0.0786667	0.779112	0.805549	X
Ighv1-63	0.0964908	1.20441	2.50415	0.235493	0.627481	0.670175	X
Ighv1-64	0.365392	-0.287882	1.24742	0.0541018	0.816074	0.84041	X
Ighv1-69	0.100157	-0.260009	2.04047	0.0165146			X
Ighv8-12	0.195322	-1.70923	1.73696	0.89782	0.343367	0.407945	X
Ighv1-72	0.246542	0.060856	1.09871	0.00906758			X
Ighv1-75	0.239727	0.0641953	1.64146	0.00187815	0.965432	0.9673	X
Ighv1-76	0.258636	-0.741278	1.65474	0.197729	0.65656	0.695497	X
Ighv1-78	0.234871	0.501782	1.63248	0.0983596	0.753807	0.78348	X
Ighv1-80	0.297187	-1.54956	1.32566	1.2949			X
Ighv1-81	0.216447	-0.907005	1.8126	0.246825			X
Ighv1-82	0.181423	0.517926	1.56384	0.10989	0.740269	0.771548	X
Sub1	1.30791	0.169672	0.103007	4.85093	0.0276313	0.0538731	X
Cct5	0.622167	0.165515	0.147316	1.31792	0.250965	0.315534	X
Rpl30	10.15	-0.0566818	0.0560315	4.61849	0.0316291	0.0604571	X
Cox6c	1.118	-0.051243	0.110514	3.65638	0.0558547	0.0936335	X
Pabpc1	2.71599	0.065057	0.0795743	1.34453	0.246237	0.312624	X
Ywhaz	2.55815	0.0585845	0.0842404	0.558199	0.454987	0.517985	X
Zfp706	1.41321	0.0435478	0.0949339	0.8549	0.35517	0.419084	X
Eif3e	0.678582	0.0313356	0.140284	0.0502456	0.822636	0.845487	X
Eif3h	1.39981	-0.0567815	0.0980432	1.19678	0.273966	0.341141	X
Ptp4a3	0.989371	-0.028884	0.128966	1.14132	0.285374	0.352801	X
Ly6d	13.7145	-0.159389	0.0806596	4.62572	0.031496	0.0604257	X
Ly6a	0.622332	-0.00328662	0.339429	0.000989927	0.9749	0.9749	X
Eef1d	0.921355	-0.0394057	0.118334	0.694305	0.404704	0.470198	X
Rpl8	8.19334	-0.0625352	0.0532768	4.84037	0.0278009	0.0539358	X
Ncf4	0.866004	-0.0496997	0.125566	0.205067	0.650661	0.692079	X
Rbx1	0.9515	-0.0441636	0.12043	1.68228	0.194622	0.257837	X
Tnfrsf13c	2.45187	0.0652492	0.100255	2.81202	0.0935608	0.140509	X
Pfdn5	1.53372	-0.00985452	0.0953143	2.12989	0.144451	0.205002	X
Pcbp2	1.85045	-0.0111807	0.0834177	0.0636372	0.800837	0.826362	X
Hnrnpa1	0.894937	0.0640689	0.130623	1.33752	0.247471	0.312659	X
Iglc3	3.69835	-0.0554284	0.08527	0.918582	0.337848	0.40231	X
Iglv1	6.28701	0.094882	0.575495	0.0273262	0.868703	0.885803	X
Iglc2	4.68806	-0.0179231	0.1198	0.0224905	0.88079	0.894606	X
Iglv3	1.50813	-0.217557	0.4005	0.304702	0.58095	0.62825	X
Iglv2	1.40907	0.353138	1.2923	0.0752983			X
Rpl35a	11.5323	-0.0568839	0.0472738	4.26934	0.0388061	0.0718458	X
Atp5j	0.975142	0.133419	0.114733	2.13805	0.143684	0.204474	X
Hmgn1	1.10832	0.0669285	0.110066	1.63783	0.200623	0.264434	X
Psmb1	0.776659	0.121838	0.123781	3.40229	0.0651059	0.106388	X
Atp6v0e	0.930975	-0.125834	0.118421	2.60105	0.106793	0.155828	X
Rps28	6.95052	0.0605258	0.0615694	3.36439	0.0666204	0.107506	X
H2-Oa	0.777853	-0.0620231	0.157018	1.84758	0.174065	0.237905	X
H2-DMb2	1.93639	-0.249416	0.11315	4.84885	0.0276646	0.0538731	X
Psmb8	1.54055	-0.000530363	0.0901818	0.944196	0.331201	0.398056	X
H2-Ob	1.2939	-0.0135876	0.14805	3.99509	0.045633	0.081792	X
H2-Aa	9.82819	-0.016574	0.149075	0.019214	0.889755	0.901943	X
H2-Eb1	7.31244	-0.0321867	0.150441	0.333043	0.563873	0.61234	X
Clic1	2.32098	0.0926221	0.0812664	1.9061	0.167397	0.231231	X
Tubb5	1.03993	0.0977506	0.132426	3.39544	0.0653771	0.106495	X
AY036118	1.13041	0.401041	0.265574	2.37447			X
Nfkbie	0.359932	0.225173	0.228913	2.32849	0.127025	0.183284	X
Hsp90ab1	5.57155	-0.0805785	0.0770456	1.75673	0.185032	0.247907	X
Cox7a2l	0.847573	0.148824	0.128213	1.42022	0.233368	0.298918	X
Reep5	0.869078	-0.106375	0.125447	1.5373	0.21502	0.27985	X
Paip2	0.710182	-0.0465567	0.135317	0.590442	0.442248	0.506592	X
Mzb1	1.04852	0.0870491	0.145956	0.354539	0.551555	0.601485	X
Cd74	74.6491	0.0920256	0.0733014	1.59423	0.206723	0.269729	X
Atp5a1	1.21806	-0.203017	0.104973	3.9407	0.0471313	0.0836096	X
Cdk2ap2	0.888736	-0.0667921	0.130781	0.931962	0.334354	0.399945	X
Ptprcap	2.85849	-0.0818419	0.0713263	1.33381	0.248128	0.312726	X
Ppp1ca	1.82869	0.0113564	0.0841626	2.95347	0.0856936	0.130942	X
Pold4	1.21529	-0.17848	0.108109	2.99752	0.083392	0.128563	X
Cfl1	4.7962	-0.0194637	0.0607243	3.89415	0.0484545	0.0850828	X
Fau	21.6863	-0.051729	0.0485088	4.90069	0.0268459	0.0528752	X
Ehd1	0.374399	0.223746	0.228494	4.72506	0.0297261	0.0574556	X
Trmt112	1.0807	0.121891	0.107861	2.88319	0.0895086	0.135962	X
Fermt3	0.777333	-0.0991986	0.142828	4.10967	0.0426387	0.0777707	X
Cox8a	2.0369	0.025047	0.0817468	0.393793	0.530312	0.583201	X
Eef1g	1.04259	0.0741945	0.114142	0.448868	0.502873	0.558988	X
Fth1	8.65441	-0.0268984	0.0572532	0.219515	0.63941	0.681511	X
Cyb561a3	0.878842	0.12607	0.131206	0.929131	0.335089	0.399945	X
Scd1	0.7193	-0.321502	0.16039	4.70584	0.0300603	0.0578856	X
