# Supplementary material for: The meningeal transcriptional response to traumatic brain injury and aging
Source: eLife. 2023 Jan 3;12:e81154. doi: 10.7554/eLife.81154 (PMC9810333; doi:10.7554/eLife.81154)
Supplement: Figure 5—source data 1. [file elife-81154-fig5-data1.xlsx]

## Sheet: Sheet1
young.sham.v.young.tbi.0.1.padj.dec	young.sham.v.young.tbi.0.1.padj.inc		aged.sham.v.aged.tbi.0.1.padj.dec	aged.sham.v.aged.tbi.0.1.padj.inc		young.sham.v.aged.sham.0.1.padj.dec	young.sham.v.aged.sham.aged.activated		young.tbi.v.aged.tbi.0.1.padj.dec	young.tbi.v.aged.tbi.0.1.padj.inc
Dnajb1	Gpx6		Tpd52l1	Cpa3		H19	Ighm		H19	Tspan32
Epha2	Vmo1		Slc5a5	Hmgn2		Scml2	Igkc		Wnt9a	Trim25
Zfp36l1	Podxl		Tspan33	Htra1		Ccnd2	Igkv4.55		Ccnd2	Itgb2
Egfl7	Ccl12		Folr1	Cd5l		Ckmt1	Ighg2b		Ins2	Cdh1
Amotl2	Synpo		Gnmt	Tmem160		Bcl6b	Trank1		Mnt	Alox12
Hlx	Shisal1		Lamb1	Rnf187		Egfl6	Ighv1.26		Ckmt1	Dazap2
Kcne4	Bpifb6		Dlgap1	Sap30l		Zfp385a	Atp1a2		Arvcf	Mx1
Jun	Bpifb4		Phyhip	Micu2		Grm6	Syt1		Fap	Lck
Rhob	Neat1		Crhr2	Pdlim2		Serpinf1	Scgn		Egfl6	Pparg
Dcc			Ddr1	Cma1		Mapk7	Jchain		Pdgfb	Cd52
Zfp467			Gys1	Snai2		Kctd10	Gpr158		Grasp	Sult5a1
Ighg2b			Arhgef18	Adam23		Col6a1	Tmem59l		Zfp385a	Car4
Igkv3.4			Stxbp2	Gnas		Pcbp3	Ly6c2		Myo18a	Lgals9
			Otx1	Mbnl1		Cfp	Igkv1.117		Loxl3	Itgb7
			Tuft1	Ptx3		Dpp9	H2.Q6		Serpinf1	Acap1
			Ttc25	Gclm		Rarg	Igha		Smarcb1	Folh1
			Slc16a12	Hacd4		Mef2d	Iglc1		Mmp14	Cpa3
			Zmynd10	Foxp2		Col1a1	Ache		N4bp3	Slc1a5
			Epn3	Itm2a		Fkbp10	C4b		Vps9d1	Vwf
			Cfap161	Tnmd		Smo	Igkv3.2		Kctd10	Grik3
			Ubxn11	Crtap		Rin2	Prrxl1		Sebox	Pnck
			Trpv4	Tpsb2		Nfix	Ptgds		Col6a1	Cd3g
			Piezo1	Nenf		Siae	Ighv1.53		Pcbp3	Hsf2bp
			Kif1a	Prrx2		Pdzd4	Cbln1		Calm1	Celf2
			Ceacam16	Taf10		Ltbp2	Sema5b		Dpp9	Napsa
			Pcolce2	Serpinb1a		Ppard	H2.Q7		Ckb	Use1
			Cltrn	P4ha3		Peg3	Ifit1		Rarg	Lcp2
			Lama5	Epha3		Zim1	Ighv3.6		Glmp	Il17ra
			Steap1	Gas1		Nr2f6	Igkv5.39		Mef2d	Cd36
			Steap2	Cd302		Ikzf4	Gm40849		Snd1	Slc2a3
			Stard13	Mcpt4		Tgfb1	Ildr2		Col18a1	Edar
			Sulf1	Insm1		Ccdc97	Ppp2r2b		Tubb6	Cd79a
			Tns4	Marcks		Fkbp7	Slc7a11		Col1a1	St8sia6
			Slc12a4	Cited4		Grin2d	Ifit2		Itga3	Cyp4f18
			Adora2b	Igkv4.70		Tmem39a	Ccl8		Nrip2	Prodh
			Dnah11	Foxd1		Lamb1	Ighv1.39		Tubb5	Ier3
			Slc25a39	Dact3		Dgcr2	Slc6a1		Jup	Cp
			Wwc1	Eid1		Csnk1g2	Cga		Fkbp10	Rps6ka1
			Cyb561	Ighv1.50		Abhd17a	Sptbn4		Ergic1	Dnase2a
			Lrriq1	Igkv5.43		Grik5	C130026I21Rik		Smo	Nqo1
			Slc6a15	Ighv1.54		Fcgrt	Ctss		Tspan33	Il7r
			Cfap54			Impdh1	Phactr1		Rin2	Gstm5
			Best3			Calr	Sgip1		Lrp3	Cacna1e
			Nav3			Akt2	Slc22a8		Folr1	Cacna1b
			Nsg2			Clec11a	Slc22a6		Nup214	Ctse
			Tcn2			Arhgef40	Tac4		Ltbp1	Cd33
			Ogdh			Sgce	Gimap3		Nacc1	Nkg7
			Arsg			Chn2	Gabrd		Nfix	Ly9
			Ace			Aqp1	Cd22		Uba1	Pgf
			Gas2l2			Cnn2	Scd1		Sipa1l2	Bcan
			Slc9a3r1			Ulk2	Adcyap1r1		Slc39a13	Chd5
			Tekt1			Ccl24	Ccl12		Sf3a1	Klf5
			Tac4			Chmp2b	H2.K1		Rhoc	Fcer1a
			Cfap52			Nid1	Snhg11		Ppard	Slc1a3
			Ston2			Cic	Irf7		Peg3	Hmox1
			Pfkp			Prkaca	Rgr		Zim1	Pafah1b3
			Fdft1			Dnajb1	Pou2af1		Metrn	Kit
			Cdc42bpb			Trim28	Ly6a		Snx9	Pan2
			Slc28a3			Reep5	Ighv1.80		Nr2f6	Ampd3
			Elovl7			Ephb3	Col23a1		Dyrk1b	Pdc
			Acox2			Rcn1	Iglv1		Ndufb2	Prg4
			Cab39l			Crkl	Oasl2		Tsc2	Pdk1
			Clu			Htra1	Slc13a3		Slc9a3r2	Itih3
			Slc22a17			Fbln1	Igkv6.17		Uck1	Prkag3
			Enpp2			Adamts4	Pappa2		Tgfb1	Slc4a1
			Cldn1			Neurl1a	Gm16505		Ccdc97	Atp1a2
			Mroh1			Epha2	Ifi211		Pex6	Mid1ip1
			Aifm3			Sulf2	Ifi213		Flii	Fhl2
			Spag6l			Ctnnb1	Enox1		Tmem39a	Pou2f2
			Maats1			Khsrp	Mpeg1		Adgre5	Mgst1
			Adamts1			Hnrnpa0	Otop3		Lamb1	Hipk1
			Clic6			Arid1a	Slco1a4		Ap2a2	Cd163
			Ldc1			Fgfrl1	H2.Q4		Med25	Derl3
			Sult1c2			Emc10	Igkv5.43		Atp5d	Ccl8
			Sult1c1			Dynll1	Tmem179		Ppp5c	Prr29
			Rsph1			G0s2	Acer2		Foxj2	Fam163b
			Rfx2			Kdelr3	Ass1		Sh3gl1	Trpm2
			Dtna			Adam19	Ppp1r1a		Dvl3	Mpo
			Psd2			Git1	Igkv4.59		Dlgap1	Apobec3
			Jakmip2			Scarf2	Sp100		Btbd2	Slc3a2
			Cidea			Ptprs	H2.Q5		Csnk1g2	Tnfrsf13b
			Mapk4			Zfp651	Doc2a		Prkcsh	Rbm25
			Fads3			Cad	Gm18194		Phyhip	Mcoln2
			Fads2			Pea15a	B2m		Crhr2	Adssl1
			Tmem132a			Clip3	Mx1		Ddr1	Vipr2
			Pip5k1b			Glis2	Dpp6		Crtc1	Sptbn4
			Pcx			Bicc1	Alcam		Sec14l2	Blk
			Gpr137			Hoxa2	Slc6a2		Mast2	Ankrd28
			Lgals12			Plekhg4	Slc6a13		Calr	Alx3
			Efhc2			Surf4	Rbp3		Akt2	Ptgds
			Itgb8			Lpl	Bin2		Col5a3	Slamf6
			Kdm5c			Srf	Trpm1		Angptl2	Cybb
			Rdh5			Rxra	Cd8a		Psap	Cd83
			Eps8l2			Chdh	Abcb1a		Eno2	Rxrg
			Myo5b			Sertad4	Igkv16.104		Gpx6	Fcgr1
			Ppm1f			Scube1	Syt4		Dnajb11	Ncf1
			Nfasc			Matn4	Ighv14.4		Clec11a	H2.M3
			F5			Rbpjl	Ighv1.18		Coro1c	Tubb1
			Prkcq			Mpp2	Igkv3.12		Arhgef40	H2.M2
			Spaca9			Traf4	Nnat		Arhgef18	Plgrkt
			Grb14			C1qtnf1	Trim30a		Aqp1	Cd274
			Abca2			Pigt	Sp110		Dlst	Slpi
			Stk39			Slc12a5	Aldoc		Plod3	Il13ra1
			Tyro3			Jph2	Map6		Nes	Rnd3
			Pcsk2			Gpx3	Sv2b		Hdgf	Aldoc
			Car2			Sep8	Cadps		Apba3	Crlf3
			Col9a3			Gid4	Rnf213		Sgta	Dhx58
			Mccc1			Chd3	Npy		Polr2a	Cyb5r3
			Slc6a17			Kdm6b	Crlf2		Letm1	Ikzf3
			Npr1			Ctdnep1	Ifi27l2a		Nid1	Slc13a3
			Sh3d19			Sparc	Osr1		Mprip	Slc2a4
			Cfap206			Copz2	Naip5		Cic	Ikzf1
			Brinp1			Slc22a5	Igkv4.57.1		Prkaca	Acsl1
			Ubap2			Scn1b	A530040E14Rik		Por	Smyd4
			Cachd1			Aoc3	AC167036.1		Reep5	Otop3
			Pomgnt1			Calm3	Ighv9.3		Ephb3	Cxcl16
			Vwa5b1			Rcn3	Prtn3		Rcn1	Ccl6
			Tinagl1			Hdac2	Ranbp3l		Naa60	Etnppl
			Slc4a2			Snx3	Aqp4		Napa	Dpep1
			Trp73			Reep3	Igkv2.109		Atp5g1	Gdpd2
			Ppp2r2c			Nts	Tchh		Cdcp3	Gyg
			Gabrb1			Dcbld1	Sel1l3		Htra1	Stxbp5
			Aass			Lama2	Ccn3		Crip2	Crybg1
			Ahcyl2			P4ha1	Igkv3.10		Cbfa2t3	Fabp7
			Slc13a4			Dcn	Epha5		Fbln1	Rspo3
			Tgfa			Epyc	Zc3hav1		Adamts4	Tmpo
			Aldh1l1			Epb41l2	Npr3		Neurl1a	Sgk1
			A2m			Nuak1	Ighv1.69		Rbm14	Myb
			Lrrc23			Igf1	Scg5		Nsmf	Ccn2
			Slco1c1			Sar1a	Gm31520		Aplp1	Ascl1
			Ldhb			Eif4ebp2	Bst2		Usp19	Srgn
			Thumpd3			Unc5b	Ms4a3		Tspan31	Plek
			Atp2b2			Slc16a7	Garnl3		Sulf2	Elane
			Oca2			Lrig3	Ifit3		Ctnnb1	Pcsk4
			Slc7a10			Grb10	H2.T23		Ppp2r1a	Dock2
			Sipa1l3			Prmt2	Selplg		Hapln4	Irak3
			Arl6ip1			Col6a2	Slc6a20a		Khsrp	Cyfip2
			Myh14			Pofut2	Nlrc5		Dio2	Rad50
			Myo7a			Slc36a2	Nebl		Ccdc124	Itk
			Cdr2			Kremen1	Cybb		Zmiz1	Havcr2
			Vwa3a			Smtn	Igkv4.80		Arid1a	Pttg1
			Cul4b			Sep4	Nkd2		Abhd8	Efemp1
			Igsf1			Rnf187	Cntn4		Emc10	Gria1
			Atp2b3			Sap30l	Rtp4		Clstn3	Nampt
			Atp11a			Galnt10	Slfn2		Ubc	Pik3cg
			Rab11fip1			Map2k6	Syk		Ubqln4	Tspan13
			Gpm6a			Rnf144a	Gm47393		Dynll1	Rgs9
			Sh3rf1			Id2	Rlbp1		Tmem184b	Abca8b
			Tbc1d9			Pxdn	Oas1a		Gnat2	Cmpk2
			Mt3			Mrc2	Lilr4b		Nav1	Bcap29
			Drc7			Tmem132e	Ptprc		Bcr	Grhl1
			Slc27a1			Grin2c	Igkv1.135		Zmynd10	Asic2
			Acad8			Rflnb	Irf4		Slc38a3	Gh
			Hyou1			Cacna1g	Slc1a3		Epn3	Slc13a5
			Dock6			Dlg4	Aox3		Kdelr3	Dlx4
			Fam81a			Vamp2	Cdh8		Adam19	Aloxe3
			Cgnl1			Acly	Mmp12		Exoc3l2	Stx8
			Elovl4			Stat5b	Tmem252		Pgam1	Coch
			Ooep			Adam11	Pdc		Git1	Nemf
			Car12			Dcakd	Cd53		Scarf2	Nfkbia
			Kif9			Fut8	Ighv1.81		Med15	Pygl
			Ttc21a			Tmx1	Ighv2.2		Tjap1	Srsf5
			Hemk1			Zfp36l1	Trem2		Cdh23	Rps6ka5
			Slc16a8			Papln	Slc2a1		Podnl1	Fbln5
			Atp1a1			Tgfb3	Adamtsl3		Adgrl1	Lgmn
			Ptprf			Ror2	Adssl1		Amotl1	Aldh6a1
			Myo5c			Msx2	Grin1		Ptprs	Meg3
			Clec18a			Pdlim7	Ctsg		Zfp651	Gpr132
			Gde1			Rhobtb3	Ighv5.12		Cad	Ryr2
			Slc16a2			Hapln1	Ighv1.19		Pea15a	Aoah
			Cdkl4			Vcan	Cd72		St3gal1	Scgn
			Kcnk1			Serinc5	Igkv3.5		Clip3	Irf4
			Foxj1			Zfyve16	Iglc2		Trpv4	Cap2
			Flvcr2			Nid2	Samsn1		Glis2	Dek
			Dynlrb2			Gdf10	Oas2		Bicc1	Id4
			Caskin2			Cnmd	Col25a1		Ube2z	Fam217a
			Mfrp			Tnfrsf10b	Neat1		Piezo1	Ly86
			Tjp3			Pdlim2	L1td1		Ankrd52	Syk
			Slc24a5			Hr	Cyp4a12b		Kif1a	Nkd2
			Crb2			Gfra2	Spn		Hoxa2	Mctp1
			Abca7			Efs	Meg3		Plekhg4	Cartpt
			Zdhhc23			Sdc2	Mapk12		Surf4	Ankra2
			Ccdc113			Retreg1	Gpr68		Actn1	Iqgap2
			Tmem184a			Myo10	Paqr5		Sirt2	Mtx3
			Acaa2			Lrp12	Cartpt		Gdi1	Erbin
			Slc39a12			Matn2	Ifit3b		Sash1	Fst
			Prr32			Sybu	Grem1		Pcolce2	Rgr
			Pacrg			Col14a1	Cd6		Atf6b	Bmp4
			Slc2a12			C1qtnf6	Ighv1.82		Notch4	Rnase4
			Shank2			Desi1	C3ar1		Prrt1	Galnt15
			Gdf7			Hdac7	Fendrr		Lama5	Zdhhc20
			Nek5			Vdr	Tnfsf10		Steap1	Lcp1
			Tmem237			Emp2	Sphk1		Steap2	Enox1
			Rilp			Hes1	Usp18		Hspa8	Epsti1
			F11r			Gpt	Sned1		Rxra	Fyb
			Kcnh2			Nectin3	Gucy1b1		Dstn	C6
			Pcp4l1			Ccdc80	Derl3		Chdh	Npr3
			Car14			Snai2	Ly6d		Stard13	Cma1
			Scube3			Boc	Ifitm3		Sertad4	Nadk2
			Ttll6			Mylk	Casp7		Slc25a5	Mtdh
			Six3			Ets2	Igkv6.15		Pls3	Eif3e
			Baiap2l1			Itsn1	Gpnmb		Mpped2	Fam49b
			Mycbpap			Enah	H2.T10		Ttll12	Parvg
			Whrn			Gzma	Ciart		Scube1	Slc38a2
			Prdm16			P3h3	Pdcd1		Sulf1	Pde1b
			Rsph4a			Kcnk5	Arhgap11a		Matn4	Ppp1r1a
			Strip2			Acy1	Myof		Rbpjl	Shisa9
			Capsl			Wfdc1	Ighv1.85		Cntnap1	Fgf12
			Orai2			Nfatc4	Ighv6.6		Med24	Atp13a3
			Tbc1d2			Pcbp4	Lair1		Mpp2	Tmem44
			Stk32a			Igf2r	Oas1b		C1qtnf1	Rogdi
			Maob			Thbs2	Ccdc85a		Timp2	Apod
			Ccdc114			Hsp90ab1	Ccr1		Zc3h18	Ly6g
			Cfap69			Ptk7	Gm4951		Tns4	Ly6c2
			Gm11992			Pgc	Igkv10.96		Elmo2	Mapk12
			Irgq			Foxp4	Il7r		Pgs1	Alcam
			Pla2g5			Nfya	H2.Q10		Pigt	Cxadr
			Ak7			Arhgap28	Olfr1372.ps1		Slc12a5	Samsn1
			Plekha6			Epb41l3	Thsd4		Slc12a4	Slc15a2
			Myrip			Wiz	Ltb		Myo1c	Son
			Arhgef11			Twsg1	Ifi44		Eya2	Soat2
			Acacb			Cacna1h	X2900052L18Rik		Ywhab	Cxcl13
			Cux2			Six2	Skap2		Ksr1	Serping1
			Dnali1			Dnase1l2	Zbp1		Gpx3	Scg5
			Ttc9			Mllt1	Mthfd1l		Anxa6	Ache
			Tmem108			Svil	Cytl1		2022-09-08	Mx2
			Mrap2			Pkdcc	Gfap		Gid4	Clec4n
			Crb3			Slc39a6	Slc8a1		Myo1b	Slc17a9
			Plppr4			Adamts10	Hhip		Chd3	Mmp25
			Ankrd45			Col11a2	Rab27a		Kdm6b	Pla2g7
			Cfap43			Prrc2a	Ighv2.3		Pip4k2b	Trem2
			Wdr72			Zfp521	Spock1		Ctdnep1	Treml1
			Dcaf12l1			Dpysl3	Slfn1		Sparc	Fgd2
			Defb11			Rab27b	Fgfbp1		Cog1	Myom1
			Fam186a			Sncaip	Cd5		Slc25a39	Clip4
			Iqub			Snx24	Gm42047		Sp2	Xdh
			Bdh1			Ppic	Hpcal4		Lsp1	Eif2ak2
			Vat1l			Prrc1	A730046J19Rik		Myh11	C3
			Cfap65			Pdgfrb	Phf24		Wwc1	Tpsab1
			Dusp18			Rab3il1	Gm8995		Fdxr	Map3k8
			Cldn2			Tmem132a	Vcam1		Pelp1	Cox7a2l
			Tmem72			Cemip2	Tspoap1		Ywhah	Syt4
			Nwd1			Cdc42bpg	Col13a1		Dalrd3	Psmb8
			Kmt2d			Ppp2r5b	Shtn1		Plod1	C2
			Msx1			Gpha2	Gria4		Scn1b	Stard4
			Elfn1			Tnfrsf25	Cxcl12		Map1s	Ltb
			Frmpd4			Il33	Tap1		Atp6v0a1	Aqp4
			Rd3			Pitpnm1	Naip2		Aoc3	Impact
			Polr1a			Lrp5	Wnt6		Calm3	Ppp2r2b
			Fzd4			Ltbp3	Slfn8		Rcn3	Pmaip1
			Vwa3b			Aldh18a1	St8sia6		Pdk4	Cndp2
			Slc29a4			Col17a1	Trim30d		Sema6a	Slc22a6
			Serpinb1b			Pycr1	Igkv12.44		Slc35e1	Anxa1
			Fhad1			Cbr2	Gabrr3		Snx3	Cd5
			Zfp579			Maged1	Sorbs1		Smpdl3a	Cd6
			Igfn1			Rfng	Vsig4		Ptprk	Ms4a7
			Trpm3			Kazald1	Pde1a		Lama2	Ms4a6b
			Ezr			Fgd1	Igkv12.41		P4ha1	Ms4a4d
			Dnah6			Maged2	Mapt		Epb41l2	Ms4a6d
			Glis3			Nab2	H2.M9		Nuak1	Ms4a2
			Aph1c			R3hdm2	Vipr2		Hsp90b1	Ms4a3
			Myh7			Gli1	Kcnt1		Igf1	Lpxn
			Spag16			Nptx1	Prg2		Sar1a	Trpm6
			Daw1			Fbxl16	Dcbld2		Eif4ebp2	Pcgf5
			Plxnb1			Sdc3	Cd3g		Pald1	Aldh3b1
			Gm14168			Crispld1	Nr6a1		Unc5b	Fermt3
			Car10			Clec3b	Ifi207		Slc16a7	Gpam
			Cndp1			Rassf3	Ide		Lrig3	Rbp4
			Abat			Rftn2	Nos1		Cand1	Maoa
			Itpk1			Col3a1	Sgms1		Rab1a	Kcnip2
			Sema3b			Cnga3	Isg15		Best3	Adpgk
			Kcnh1			Ctdsp1	Grap2		Grb10	Tro
			Syt17			Igfbp5	mt.Rnr2		Nav3	Sat1
			Kl			Obsl1	Oasl1		Csrp2	Padi3
			Frem1			Nppc	Cd52		Cabin1	Padi1
			Gckr			Bok	Psmb8		Ap3d1	Padi4
			Sntb1			Pam	Nrxn3		Hmg20b	Cd163l1
			Dnaic1			Rgl1	Bmp4		Ncln	Ifitm1
			Ttr			Mpzl1	D430041D05Rik		Col6a2	Ifitm3
			Pgk1			Dpt	Igkv9.124		Pofut2	Clybl
			Cnnm2			Prrx1	Prodh		Slc36a1	Cpeb1
			Rab3ip			Traf5	Bcan		Adarb1	Slco3a1
			Slc31a1			Ddr2	Coro1a		Slc36a2	Rpl14
			Col4a4			Ccdc3	Igkv8.27		Nsg2	Prkar1b
			Syngap1			Tnn	Cpeb1		Hcn2	Cplx2
			Slc4a5			Lypd6b	Ier3		Mgat1	Casp12
			Tlx2			St6galnac6	H2.DMb2		Flt4	Gria4
			Gmnc			Ak1	Eps8l1		Hnrnpab	Tfap2b
			Cgn			Slc25a25	Tmod2		Hspa4	Gsta3
			Rbm47			Dnm1	Cirbp		Jade2	Icos
			X2410004P03Rik			Nr4a2	Prr29		Kremen1	Cd28
			Fam189a2			Col5a1	Acsbg1		Tnip1	Slc9a2
			Tmprss11a			Gpsm1	Iqgap2		Tns3	Il18rap
			Sod3			Cat	Dhx58		Osbp2	Il18r1
			Drc1			Fbn1	Crmp1		Smtn	Il1r1
			Catip			Tspan18	Fgf12		Guk1	Eif5b
			Spint2			Sord	Fcgr1		Ogdh	Stat1
			Bhmt			Creb3l1	Mgarp		Aebp1	Zap70
			Itpripl1			Lrp4	Rsad2		Rnf187	Ogfrl1
			Klhdc7a			Dll4	Itpr3		Galnt10	Wnt10a
			Cfap74			Fbln7	Ceacam16		Myo19	Cyp27a1
			Kcnj13			Cpxm1	Gm14964		Llgl1	Ptprn
			Col4a3			Fam110a	Gpr31c		Tom1l1	Sp100
			BC021767			Angpt4	Ighv5.17		Stxbp4	Itm2c
			Prdm16os			Gnas	Lax1		Pdia6	Pdcd1
			Wipf3			Car3	Ifi204		Laptm4a	Rgs2
			Gm13110			Dok5	Ighv1.64		Map2k6	Ptprc
			Ak9			Map1lc3a	Gm43534		Rnf144a	Rassf5
			Six3os1			Slc2a10	Tlr7		Mboat2	Lamc2
			Ighv1.77			Postn	Oas3		Pxdn	Coq8a
			Tmem151b			Wwtr1	Plcb2		Mrc2	Kif26b
			Gm26684			Tsc22d2	Casp4		Cluh	Ifi211
			Gm26917			Mme	Gbp8		Tmem94	Slamf9
			Sowahc			Ptx3	Cyfip2		Galr2	Sell
			Gm28729			Olfml3	Dgkd		Tekt1	Nphs2
			Gm42793			Syt6	Itgb7		Mxra7	2022-03-01
			CT010467.1			Ptgfrn	Igkv1.88		Kif1c	Lamb3
			Gm44250			Hmgcs2	Parvg		Sec14l1	Fcgr2b
			Gm5737			Ampd2	Ikzf3		Mink1	Fmo4
			Gm19935			Slc27a3	Arhgap45		Slc46a1	Bmi1
			Gm34721			Col11a1	Kcnj10		Blmh	Pfkfb3
			X2900040C04Rik			Snx7	Ctsc		Rflnb	Lcn2
			Gm19500			Enpep	Vav1		Ankrd40	Gbgt1
						Dkk2	AU020206		Cacna1g	Cytip
						Ptgfr	Ighv1.77		Lrrc59	Fcnb
						Hcn3	Cd79a		Dlg4	Stom
						Lmna	Dclk3		Vamp2	Ifih1
						Epha7	Pglyrp1		Myh10	Egfl7
						Col15a1	Ms4a4b		Cfap52	Fcna
						Tnc	H2.D1		Acly	Grin1
						Ptprd	Ldha		Adam11	Arrdc1
						Dnaja1	Vmp1		Dcakd	2022-03-07
						Cntfr	Tal2		Ston2	Psd4
						Tesk1	Fcer1a		Sptb	Ly75
						Tpm2	Irak3		Bdkrb2	Hnmt
						Plpp3	Ighv1.5		Zfp36l1	Baz2b
						B4galt2	Vill		Pacs2	Dapl1
						Rnf11	Trpm6		Mta1	Itga4
						Nfia	Apobec1		Chga	Cybrd1
						Lrrc38	C1qa		Papln	Prg2
						Gpx7	Ptprn		Numb	Ube2l6
						P3h1	Sh3gl3		Tgfb3	Tfpi
						Ephb2	Apol11b		Esrrb	Pamr1
						Ptch2	AC147806.2		Vash1	Fgf7
						Hspg2	Dcdc2a		Cdc42bpb	Slc28a2
						Alpl	H2.Eb2		Sfrp4	Pacsin3
						Stmn1	Hp		Ror2	Spint1
						Map7d1	Plek		Cdk20	Adam33
						Slc9a1	Fam163b		Lman2	Rasgrp1
						Arhgef19	Sema3d		Pdlim7	Mal
						Cdk14	Itgb2		Dapk1	Zbp1
						Smarcd3	Nlrp5.ps		Hapln1	Fabp5
						Ski	Gm10499		Vcan	Sall4
						Plch2	Tspan8		F2rl1	Car1
						Mmp23	Ifitm1		Elovl7	Hps3
						Mxra8	Irf8		Serinc5	Mecom
						Adgra3	Pla2g7		Acox2	Slc7a11
						Sorcs2	Il18rap		Plpp1	Mbnl1
						Htra3	Ighv1.7		Dlg5	Bche
						Evc	Etnppl		Cdhr1	Tm4sf1
						Cgref1	Plac8		Nid2	Pfn2
						Emilin1	Msln		Zswim8	Ptpn22
						Fam114a1	Adam33		Samd4	Cd2
						Cxcl3	Adgrg5		Arf4	Dennd2d
						Shroom3	AW112010		Sema3g	Gask1b
						Ncor2	Lck		Nisch	Vcam1
						Srsf9	H2.M3		Gdf10	Lrat
						Foxp2	H2.T22		Extl3	Ifi44
						Actb	Nap1l5		Cab39l	Polr3gl
						Fscn1	Cxcl13		Spata13	Adgrl2
						Col1a2	Ccbe1		Mipep	Ccn1
						Auts2	Car4		Tsc22d1	Gem
						Gnb2	Thbs1		Sorbs3	Lmo4
						Pcolce	Lama1		Slc39a14	Gbp3
						Dlx5	Ptpn22		Hr	Cga
						Dync1i1	Jakmip3		Bmp1	Xpa
						Calu	Cd33		Dct	Coro2a
						Fkbp9	Igkv5.48		Gzme	Ugcg
						Zyx	Mlc1		Mettl3	Ptbp3
						Dusp11	Cd8b1		Lrp10	Wdr31
						Adamts9	H2.T.ps		Oxct1	Spink4
						Gxylt2	Nyap2		Drosha	Tal2
						Grip2	Slc16a11		Pdzd2	Cd72
						Mlf2	Tnfrsf11b		Slc22a17	Glipr2
						Ptms	Hk2		Efs	Plin2
						Plxnd1	Lrat		Jph4	Mllt3
						Lrp6	Ighv1.72		Sdc2	Hacd4
						Abcc9	Havcr2		Retreg1	Sgip1
						Sspn	Slc30a10		Myo10	Cdkn2c
						Srgap3	Sez6l		Matn2	Echdc2
						Tspan9	Igkv8.19		Col14a1	Lrp8
						Fkbp4	Per2		Asap1	Col9a2
						Mark4	Arhgap30		Zc3h7b	Ctps
						Dmpk	Cpne7		Enpp2	Slc2a1
						Kctd15	Plscr2		Parvb	Plk3
						Pcsk6	Rian		C1qtnf6	Pdzk1ip1
						Lrfn1	Dock3		Myh9	Sema3c
						Acan	Hmgb2		Srebf2	Trim63
						Sytl2	Igkv4.50		Hdac7	Smpdl3b
						Maz	Cyp4f18		Aco2	Trnau1ap
						Chrdl2	Cd2		Vdr	Rpl22
						Sh2b1	Fbxo2		Emp2	Acot7
						Pak1	H2.Q1		Bcl6	Espn
						Tgfb1i1	Nckap1l		Cldn1	Abcb1b
						Fgfr2	Arrdc3		Plec	Mad2l2
						Cpxm2	Icosl		Lynx1	Draxin
						Cckbr	Stxbp2		Lmf2	Prkcz
						Crym	Gclc		Shank3	Gabrd
						Tub	A530020G20Rik		Nectin3	Prxl2b
						Smarca1	Clic5		Ccdc80	Bst1
						Slc9a9	Sult1c2		Boc	Ablim2
						Cacna1f	Ptpn6		Spag6l	Khk
						Efnb1	Srarp		Maats1	Dpysl5
						Itm2a	Megf10		Fstl1	Sel1l3
						Tnmd	Igkv6.20		Itgb5	Rhoh
						Chrdl1	Ighv5.6		Mylk	Uchl1
						Lrch2	Iigp1		Ap2m1	Epha5
						Rs1	Xaf1		App	Stap1
						Morf4l2	C6		Adamts1	Plac8
						Grk1	Ighv1.9		Adamts5	Nos1
						Angpt2	Mlkl		Clic6	Afm
						Adgra2	Atp10a		Itsn1	Ppbp
						Tenm3	Slc23a2		Scaf4	Naaa
						Plpp5	Ighg1		Krt75	Acad10
						Pdgfrl	Mpo		Adcy6	P2rx7
						Hpgd	Impg2		Enah	Anxa3
						Ednra	Fam169b		Wnt10b	Oasl2
						Cdh11	Tmem37		Fmnl3	Oas1b
						Irx3	Clca3a1		Nckap5l	Ccz1
						Irx5	Pgf		Csad	Adcyap1r1
						St3gal2	C1qb		Map3k12	Herc6
						Cngb1	Fgf7		Sympk	Abcg2
						Mmp15	Chd5		Gzma	Herc3
						Pik3r2	Ccl5		P3h3	Malsu1
						Mbtps1	Hspa12a		Parp3	Gpnmb
						Rab3a	Serpine1		Creld2	Npy
						Comp	Apol9b		Wfdc1	Zc3hav1
						Cmtm3	Mndal		Agap3	Clec5a
						Bcar1	Ighv1.55		Nfatc4	Hpgds
						X2310022B05Rik	A530032D15Rik		Gnb3	Rab19
						Egln1	Apol9a		Pcbp4	Foxp1
						Sesn3	Nxph3		Synj2	Chl1
						Nectin1	Ighv1.58		Agpat4	Bhlhe40
						Oaf	Cacna1b		Igf2r	Usp18
						Clmp	Map3k8		Smoc2	Slc6a13
						Bace1	H2.M11		Tnfrsf12a	Mfap5
						Stt3a	Acap1		Paqr4	Gdf3
						C2cd2l	Kng2		Slc29a1	Clec4d
						Itga11	Igkv15.103		Hsp90ab1	Cd69
						Col12a1	Tubb2b		Ptk7	Kdm5a
						Loxl1	Fcgr4		Prph2	Plbd1
						Neo1	Fcgr2b		Foxp4	Arhgdib
						Impg1	Pde10a		Nfya	Slco1a4
						Tmed3	Dst		Brd4	Bhlhe41
						Tpm1	Anxa3		Pi16	Mtmr14
						Dapk2	Itgal		Mtch1	Cpne9
						Crtap	Trbc2		Rsph1	Tmtc1
						Pth1r	Gldn		Arhgap28	Slc6a1
						Amotl2	Gzmk		Epb41l3	Dennd5b
						Chsy1	Tspan10		Wiz	Clec2i
						Mdfi	Pirb		Atp6v0c	Zik1
						Tpcn1	Igkv9.120		Six2	Pglyrp1
						Heyl	Ms4a4d		Fam234a	Psd3
						Igdcc4	Alpk1		Rfx2	Trpm1
						Prr5l	Pbx3		Mllt1	Synm
						Arhgef17	Cd84		Svil	Cd22
						Lmo7	Syt10		Adamts10	Tyrobp
						Podxl2	Ccl7		Psd2	Sh3gl3
						Mgll	Ly9		Bin1	Klk10
						Ttc28	Pde1b		Bag6	Coro1a
						Duox1	Slc38a5		Prrc2a	Sult1a1
						Ptprf	Baz1a		Zfp521	Lat
						Lpp	Igkv4.79		Lama3	Dgat2
						Chst2	Pdzk1ip1		Dhx16	Acer3
						Prrg3	Ighd		Pcdh12	Rbbp6
						Antxr1	Sla		Arap3	Itgam
						Armcx2	Lcp2		Dpysl3	Itgax
						Rbfox2	Stat1		Jakmip2	Adm
						Igf2bp2	Gp5		Rab27b	Cd37
						Ndn	Gm5424		Cidea	Itgal
						Mtss2	Ighv1.50		Ppic	Trim30a
						Tpst1	Fabp7		Cxxc1	Chst15
						Scx	Hs3st3a1		Prrc1	Swap70
						Emid1	Begain		Pdgfrb	Stk33
						Loxl2	Ly75		Fth1	Sash3
						Gpc1	Treml1		Fads3	Rbm3
						Agpat1	Fcmr		Fads2	Pak3
						Fhod3	Cd37		Tmem132a	Phka2
						Fam53c	Slamf9		Cdc42bpg	Il2rg
						Slc24a1	Akr1b10		Ehd1	G6pdx
						Poglut3	Gm20486		Atg2a	Zcchc18
						Zfp395	Igkv1.110		Ppp2r5b	Cd209d
						Ppm1h	Cbs		Gpha2	Saraf
						Lrrn1	Oas1g		Tnfrsf25	Slc7a2
						Dbn1	Lrp11		Syvn1	Nr3c2
						Sema3f	Ifi203		Pitpnm1	Tlr3
						Prr7	Hhipl1		Cdk2ap2	Cbln1
						Ttyh2	Upk1b		Pip5k1b	Hp
						Plvap	Resp18		Peli3	Cep57
						Ano8	Tmem63c		Lrp5	St14
						Fam167a	Traf3ip3		Rela	Pdgfd
						Plekhh3	Zmynd15		Ltbp3	Trim29
						Lars2	Ifitm6		Gpr137	Pou2af1
						Epn1	Cxcl10		Bad	Dixdc1
						Lcat	Ch25h		Stip1	Il10ra
						Abi3bp	Cdkn2c		Mark2	Cd3e
						Ssc5d	Abcc4		Aldh18a1	Cd3d
						Sec31a	Slc5a5		Xpnpep1	Vps11
						X1810055G02Rik	Pnpla7		Trim8	Tmod2
						Reep6	Slc28a2		Afap1l2	Rab27a
						Acta2	Apobr		P4hb	Sltm
						Twist1	Foxf1		Arhgdia	Phip
						Cd276	Nphs2		Pycr1	Thsd4
						Rusc2	mt.Tp		Maged1	Gsta4
						Smug1	Il17ra		Fasn	Plscr1
						H1f2	Cyth4		Rfng	Plscr2
						Sh3bp4	Cacna1a		Got1	Plscr4
						Igfbp7	Ifi209		Kazald1	Tipin
						Fstl4	Igkv14.111		Gbf1	Tbx18
						X9530068E07Rik	Synm		Nfkb2	Nmnat3
						Siah2	Stxbp1		Sufu	Ngp
						Ppfibp2	Trpm2		Fgd1	Ptgs2
						Adamts2	Astn1		Banp	Acpp
						Ttyh3	Ramp1		Kdm5c	Uba7
						Cpz	Mmrn1		Itga7	Thsd7a
						Chst12	Gbp3		Rdh5	Malt1
						Alx1	Cd274		Gdf11	Oas2
						Tcaf1	Plscr4		Smarcc2	Lmo2
						Dner	Eogt		Faap100	Lama1
						Dchs1	Atp2a3		Pde6g	Abcc4
						Smad6	Adhfe1		Atp5b	Rims3
						Fzd8	Cyp2e1		R3hdm2	Vsx1
						Lrfn3	Ifih1		Gli1	Phldb2
						Asap3	Gpr183		Usp33	Gm9758
						Frem2	Tgtp2		Eps8l2	Rac2
						Pax1	Myzap		Cbx2	Wnt6
						Cavin3	Sgf29		Cbx8	Gstt2
						Setd7	Rac2		Gaa	Rtp4
						Mycn	Gm37795		Nptx1	Crlf2
						Syn1	Hpca		Uqcrc1	Cryzl2
						Mospd3	Aldh6a1		Sdc3	Casp4
						Mxd4	Lrrc27		Hadha	Tmem131l
						Spon2	Mir142hg		Hspa4l	Nrxn2
						Plekhg2	Gpr4		Crispld1	Tlr13
						Osbpl5	Dennd1c		Itih5	Tpsb2
						Wdtc1	Lsr		Clec3b	B3galt2
						Kcnk2	Gm27032		St8sia2	Vav1
						Slc20a2	Ggact		Hgs	Tspan8
						Ahdc1	Prkcz		Pdia4	Kif4
						Fermt2	Ccdc9b		Higd2a	Tmem132c
						N4bp2	Glipr1		Myo5b	Smc4
						D630003M21Rik	Fgr		Hspd1	Ramp1
						Dusp8	Lpar6		Trak2	Parp14
						Rara	Jaml		Col5a2	Gbp8
						Socs1	Bcl2		Col3a1	Ifit1
						Fkbp14	Rnf43		Map4k4	Scara3
						Cdon	Lrrc8d		Cnga3	Ly6d
						Pde4dip	Cap2		Tmem131	Ankrd12
						Tlcd2	Cpne9		Sema4c	Cd300a
						Gask1a	Igkv10.94		Ctdsp1	Cacna1a
						Sobp	Lepr		Ppm1f	Itga2b
						Spats2l	Clec12a		Igfbp5	Neurod1
						Satb2	Plin4		Obsl1	B3galt1
						Sgsm2	Ttyh1		Ptma	Cpne7
						Ankrd35	Akap6		Nppc	Dpp4
						Lasp1	Siglec1		Rnpepl1	Igsf6
						Trp53inp2	Gm26704		Pam	Baz1a
						Setd1b	Ms4a6b		Arl8a	Ccl5
						Olfml2b	Bmp6		Lrrn2	Arhgap5
						Ptov1	Tnfsf8		Ppfia4	Slfn8
						Rgs4	Fdft1		Atp2b4	Impg2
						Atf5	Abcb1b		Lhx4	Hpse
						Cul7	Prok2		Lamc1	Ccl12
						Fndc4	Slc22a2		Rgl1	Ccl7
						Shank1	Ostm1		Cdc42bpa	Cdcp1
						Lmx1b	Slfn5		Tagln2	Pcdh17
						Ost4	Gm44421		Copa	Chrna5
						Rap1gap2	Cmpk2		Mpzl1	Muc20
						Zfhx3	Csf2rb2		F5	Thrsp
						Ppp1r9b	Lrrc2		Sec16b	Isg15
						Zfp503	Gm5127		Bpnt1	Arhgap45
						Chad	Gsta3		Plxna2	Dok3
						En2	Ctxn3		Ddr2	Mlc1
						Whrn	Uchl1		Ccdc3	Tk2
						Runx2	Gm49769		Tnn	Syt1
						Dap	Spink4		Plxdc2	Dcdc2a
						Sec24d	Mro		Lypd6b	H2.Q4
						Lgi2	Ackr2		Pkn3	Tmem59l
						Prrc2b	Srsf5		Fam129b	Phf24
						Fut11	C1ra		St6galnac6	Rorb
						Hlx	Gm17019		Eng	Cdh8
						Prss23	Cd3e		Ralgds	Greb1
						Prrx2	Slco2b1		Dnm1	Upf3b
						Tnrc18	Creg2		X1700007K13Rik	H2.Aa
						Nrtn	Tubb1		Olfm1	Dnajc12
						Dse	Soat1		Col5a1	Fam135b
						Vasn	Rgs2		Hspa5	Slc6a20a
						Cercam	Mogat1		Gsn	Pnpla7
						Fgl2	Il2rg		Dab2ip	Wnt4
						Clstn1	F10		Grb14	C1qa
						Klhl42	Ceacam1		Notch1	Gtdc1
						Kcns1	Fcer1g		Entr1	C1qb
						Daam2	Slc43a3		Nacc2	Stag3
						Map3k10	Alox12		Itga6	Tmem71
						Mar9	Cytip		Caprin1	Scd1
						Zfp609	Ighv4.1		Cat	Mgarp
						Pitpnm3	Kbtbd11		Fbn1	Rsrp1
						Aipl1	Gm15222		Tspan18	Traf3ip3
						Col16a1	Flt3		Mapk8ip1	Tap1
						Iqsec3	Oosp1		Creb3l1	Mfsd2b
						Six5	Ighv1.76		Pdia3	Uvssa
						Szrd1	Htt		Lrp4	Ccn3
						Atp1a3	Lao1		Map1a	Serpine1
						Arhgef10l	Lrp8		Mkks	Vnn1
						Igsf21	Igkv8.21		Tyro3	H2.DMb2
						Npnt	Fcrl5		Spef1	Rgs22
						Elmo1	Myo18b		Mall	H2.DMa
						Ccdc8	Tmem154		Fbln7	Fam76b
						Atp1b2	Abcg2		Cpxm1	Ddx60
						Rap1gap	Dpp4		Pcsk2	Ccr7
						B4galnt3	Ccdc88c		Rrbp1	Snn
						Mdfic	Edn1		Snph	Arap2
						Fmod	Nos3		Fam110a	Acer2
						Coro2b	Lgals3bp		Angpt4	Smim3
						Kirrel	Sult1c1		Slc52a3	Rnf144b
						Rnf10	Chrnb4		Bpifb1	Cntln
						Tcf20	Gpr55		Atp9a	Rbm24
						Shisa4	Uimc1		Col9a3	Cd84
						Lman1	Pou2f2		Chrna4	Slamf7
						Fam222a	Mfsd2b		Zgpat	Ostm1
						Zbed3	Ctps		Raly	Camp
						Kdm5b	A630001G21Rik		Map1lc3a	Gmds
						Ctf1	BC051142		Epb41l1	Txnip
						Fbrs	Nrcam		Aar2	Fcrla
						Mfap4	Il9r		Src	Hdhd3
						Tbc1d8b	Igkv8.28		Slc2a10	Parp12
						Pwwp3b	Ighv1.42		Mccc1	C1s1
						Sem1	Napsa		Postn	Ciart
						Kcna4	Zc3h12d		Wwtr1	Ctss
						Shc1	Ankrd12		Olfml3	Pbx3
						Tceal9	Shisa9		Syt6	Pkhd1l1
						Trim46	Tlr13		Ptgfrn	Ptpn3
						Gpr153	Sigirr		Notch2	Vill
						Snai1	Cox8b		X1700013F07Rik	Ephx1
						Nrep	H2.K2		Ampd2	Gcnt1
						Sbk1	Slc7a2		Npr1	Garnl3
						Hic1	Mgst1		Slc27a3	Shfl
						Elfn2	X2210039B01Rik		Ints3	Rpl12
						Mdga1	Piwil4		Col11a1	Bmp6
						Ecm2	Grtp1		Prss12	St6galnac5
						Adamts3	Ighv14.2		Dkk2	2022-03-06
						Prr33	Gdpd2		Ptgfr	Nexn
						Zmym1	Atp10d		Zbtb7b	Prune2
						Cilp2	Mpped1		Hcn3	Rlbp1
						Irf2bp1	Igkv4.74		Lmna	Arid4b
						Trp53i13	Slc2a3		Sh3d19	Gimap3
						Aplnr	Dgat2		Pias3	Tnfsf10
						Sptssa	Setdb2		Ctsk	C130074G19Rik
						Shisa2	Rorb		Rap1gds1	Ppl
						X2510039O18Rik	Pamr1		Nfkb1	Mocos
						Dact1	Prxl2a		Pdlim5	Dock3
						Tceal3	Gm5547		Cfap206	Htatip2
						Zbtb7c	Slc13a4		Col15a1	Thap3
						Zfp354c	Klra2		Brinp1	Cpeb2
						Shb	Asic2		Tnc	Rhou
						H1f10	Dpysl5		Dnaja1	Rsbn1l
						Ubtd2	Gm18342		B4galt1	Ifi203
						Med26	Mfap5		Nol6	Saa3
						Adra2c	Ank3		Ubap2	Stat2
						Dipk2a	Ifi206		Cntfr	Thbs1
						Pou3f3	C3		Pigo	Fmo2
						Penk	Hap1		Rgp1	Gbp7
						Pid1	Parp14		Plpp3	Sema3d
						Col27a1	Slamf7		Ak4	Cdk6
						Basp1	Lfng		Cachd1	Ctsg
						Ifitm10	Ncf1		St3gal3	Arhgap9
						Slitrk6	Sh2d2a		B4galt2	Trim7
						B3gat1	Bmp8a		Pum1	Slc25a28
						Hs3st2	Slc22a3		Lrrc38	Cdh18
						Cmtr2	Fgfbp3		Gpx7	Cdh12
						C1qtnf2	Stk33		Kcnq4	Arglu1
						Zfp319	Apobec3		Hivep3	Milr1
						Prr12	Slc20a1		Ybx1	Gstm2
						Ddit4l	Itgam		P3h1	Slc26a7
						Slc39a3	Nampt		Ephb2	Abcb1a
						Ckap4	Wnt9b		Ptch2	Ofd1
						Ankrd33	Coro2a		Pomgnt1	Cd79b
						Samd14	Iglv3		Eif4g3	Ildr2
						Gap43	Lyn		Hspg2	Apobec1
						Kcne4	Fcrla		Alpl	Ppp1r14c
						Gm973	Zfp941		Tinagl1	Mthfd1l
						Adamts12	Clec4d		Rnf19b	Creg1
						Flrt1	Acsm4		Phc2	Rcsd1
						Pygo2	Gbp5		Sfpq	Cd53
						Ldlrad3	Abcc1		AU040320	Oard1
						Tenm4	Elane		Ncdn	Chil3
						Col6a3	Auh		Map7d1	Begain
						Frmd6	Bend6		Slc9a1	Padi6
						Omd	Spi1		Wasf2	Slc16a11
						Fam171b	Slc10a6		Ptpru	Rps19
						Mlec	Pik3r5		Arhgef19	Slc22a2
						Igf2	Ms4a4c		Cdk14	Mill2
						Nog	Dock2		Smarcd3	Pde9a
						Mex3d	Igsf6		Slc4a2	Pla2g2d
						Insc	Cldn5		Casz1	Arhgap11a
						Rnf24	Tlx2		Mthfr	Chd7
						Efna5	Ddx25		Mfn2	Car8
						Tada3	Lhfpl5		Trp73	Shtn1
						Agtr1a	Tnr		Ski	Cldn5
						Lix1l	Cd300lf		Plch2	Smpx
						Prokr1	Sh2d6		Mxra8	Irf8
						Cdc42ep1	Stmn2		Dvl1	H2.Ob
						Pheta2	Cxcr4		Adgra3	Fbxo2
						Armcx4	Rasd2		Sorcs2	Nlrp5.ps
						Lrrc4	Cxcr2		Htra3	Ggact
						Shisa3	Csf3r		Add1	Mpped1
						Sarm1	Syt5		Ppp2r2c	Prrxl1
						Il17d	Nkg7		Spata18	Pgm5
						Fzd2	Plscr1		Emilin1	Tspo
						Adra1b	Adrb2		Mapre3	Trem3
						Vstm4	Mx2		Fam114a1	Oasl1
						Emilin3	Rasal3		Crybb3	Oosp1
						Fam131a	Arhgdib		Shroom3	Elmod1
						Zfp623	Tfap2b		Pitpnm2	Bend6
						Gja1	Itga2b		Uso1	Grk3
						Selenon	Serpina3f		Mmp17	S100a14
						Gprc5c	Aanat		Aldh2	Ubash3a
						P4ha3	Pla2g4a		Camkk2	Grap2
						Bzw1	Apol10b		Ncor2	Esm1
						Pcdh1	H2.Eb1		Ulk1	Gzmk
						Irf2bp2	Stat2		Ints1	Rbm7
						Mical3	Psd4		Sppl3	Fcmr
						Pcbp1	Bche		Ube3b	Itpr3
						Mest	Cd163l1		Actb	Arrdc4
						Ostn	Scn3b		Fscn1	Id1
						Lrrc15	Icam1		Plbd2	Foxf1
						Mpp3	Slc9a2		Wasf3	Serpinb6b
						Robo2	Cd14		Hsph1	Zc3h6
						Nrk	Ampd3		Col1a2	Ppp2r3a
						Rnf157	Cyp27a1		Auts2	Sptssb
						C130021I20Rik	Naaladl1		Eln	B430306N03Rik
						Gas1	Cp		Ephb4	X2900005J15Rik
						Cyp2f2	Igkv14.130		Gnb2	Pcdhb14
						X2700081O15Rik	Cdh15		Pcolce	Vsig4
						Ebf4	Hdhd3		Tsc22d4	Ctla2a
						Sh3pxd2a	Nfkbiz		Dlx6	Snhg11
						Dusp7	Gm44829		Dlx5	Lacc1
						Mat2a	Gimap8		Dync1i1	Ackr2
						Cyhr1	Lcp1		Calu	Tlr7
						Cthrc1	Phf11d		Adamts9	Cnpy1
						Fgfr3	Lilra5		Lrig1	Serpinb1a
						Msi1	Dock5		Wbp1	Klk14
						P2ry10b	Ctnna1		Copg1	Cd300c2
						Bsx	Plekhh2		Rpn1	Tlr1
						Rhob	Gm12185		Gxylt2	Arhgef37
						Tle5	B130024G19Rik		Sec61a1	Cirbp
						Adam12	mt.Co1		Plxna1	Cxcr4
						Tmem119	Gm35572		Itpr1	Zfp956
						Nfic	Aldh1a1		A2m	Serpinb9
						Klf2	Cbx7		Mlf2	Clec14a
						Sertad3	Fmo6		Ptms	Ifit2
						Fat2	Ighv1.63		Plxnd1	Gpr158
						Maf	Srrm2		Lrrc23	Hpcal4
						Pprc1	Miat		Wnt5b	Chrm3
						Hmcn2	Gbp9		Ybx3	Gldn
						Gpc3	Clu		Emp1	Cd109
						Rras2	Col9a2		Wbp11	Pnma2
						Rtl6	Adcy1		Mgp	Vps13a
						Tmem150a	Hrct1		Slco1c1	Pilra
						St3gal5	Rabepk		Abcc9	Ccbe1
						Col8a2	Gm9758		Sspn	Tifa
						Pard6g	Ighv1.74		Srgap3	Bst2
						Myh1	Ighg3		Creld1	Nxph3
						Cd248	Rab44		Atp2b2	Mpeg1
						Gulp1	Csf2rb		Vgll4	Ltb4r1
						Ado	Adamts8		Cand2	Gpr156
						Gsk3a	Gdf3		Ltbr	Mipol1
						Megf6	Parp10		Tnfrsf1a	Cd24a
						Sep11	Igkv12.98		Tspan9	Kcne4
						Palld	Sox17		Fkbp4	Gpr68
						Adamts17	Pla1a		Strn4	Fam180a
						Smco4	Syn2		Mark4	Baiap3
						Tspan7	Hpse		Dmpk	Nxpe5
						Upf1	Igkv4.91		U2af2	Paxx
						Thra	Ubd		Oca2	Fgfbp3
						Kcp	Slc16a12		Slc7a10	Hs3st3a1
						Slc27a4	Crlf1		Kctd15	Slc38a9
						Eda	Tbx1		Pcsk6	Cd300lf
						Actg2	Tedc2		Crtc3	Diras2
						Gckr	Klf5		Furin	Gp5
						Kmt5c	Sirpb1c		Unc45a	Neurod4
						Dsc3	Ighv2.9		Sipa1l3	Fcrl5
						Nptx2	Il1r2		Acan	Selplg
						Atxn7l3	Lrrc8b		Sytl2	Crebrf
						Slc35e3	Clec2d		Prss23os	Fgfbp1
						Sp7	Gm12250		Arl6ip1	Scrt1
						Samd5	Inpp5d		Xylt1	Osr1
						Tnfrsf19	A530030E21Rik		Maz	Ranbp3l
						Mfap2	Car14		Chrdl2	Cxcr6
						Atp8b2	Ifi208		Sh2b1	Tmem252
						Bloc1s4	Acr		Myh14	Myof
						Tmem263	Cyp4v3		Myo7a	Lurap1l
						Retnla	Rin1		Parva	Arhgap30
						Ssbp3	Ighv10.3		Pak1	Ndnf
						Actg1	Cep85		Tgfb1i1	Hcar1
						Clip2	X1700030C10Rik.1		Nucb1	Upk1b
						Numbl	Dixdc1		Nomo1	Pls1
						Grm4	Rasgef1b		Bag3	Fzd9
						Bcl9l	Il18r1		Ubfd1	Gpr55
						Gng8	Irs2		Gga2	Mmp12
						Slc24a3	Msi2		Cdr2	Arhgap15
						Hmcn1	Pde5a		Vwa3a	Arl4c
						Capn6	Slc7a14		Usp9x	Grem2
						Pi15	Aim2		St5	Cxcr3
						Myl9	Serpinb6b		Tub	Lgals3
						Tcf15	Arhgef37		Rbm10	Gpr18
						Col8a1	Cxadr		Cdk16	Catsperz
						Zfp467	Crybg1		Glrx3	P2ry10
						Myadm	Gm30571		Mrgprf	Creg2
						Marcks	Igkv13.85		Cttn	Hs3st1
						Slc47a2	Sema3e		Igsf1	Commd3
						B3gnt9	Cacnb2		Cacna1f	Nyx
						Fat1	Sytl4		Efnb1	Ffar2
						Scn2b	Uhrf1bp1l		Itm2a	Tacstd2
						Serpinh1	H2.Ab1		Srpx2	Cd14
						Slc17a7	Itgb2l		Lrch2	Spn
						Mn1	Chd7		Rs1	Siglech
						Lactbl1	Gm8369		Bgn	Wdfy4
						Tmem200b	Abca7		Atp2b3	Wfdc21
						Pnmal2	Rogdi		Hcfc1	Rspo2
						Cited4	Soat2		Morf4l2	Lax1
						Syndig1l	Dock9		Tsc22d3	Slc6a7
						B3gat3	Mal		Mcf2l	Rgs14
						Fndc1	Adh7		Angpt2	Sema5b
						Cep170b	Nxpe3		Adgra2	Rasal3
						Prr16	Prnp		Col4a1	Pld4
						Il11ra1	Il12rb1		Col4a2	Gm14964
						Rbm15b	Vwf		Arhgef7	Fpr2
						Bglap	Ephx1		Gpat4	Cdc42se2
						Bglap2	Rhou		Adam9	Doc2a
						Fat3	Pcare		Tenm3	Tchh
						Chst14	Ipcef1		Fgfr1	Cebpe
						Pde11a	Paics		Plpp5	C130026I21Rik
						Gm23935	Grik3		Hpgd	Epha3
						Gm24270	Ikzf1		Ednra	Zmat1
						Ighv7.1	Pan2		Sh3rf1	Kcnt2
						Nrarp	Phf11c		Sall1	A630001G21Rik
						Foxd1	Rab19		Got2	Oas1a
						Dact3	Lmbr1l		Rfx1	Prkcb
						Col22a1	Nmb		Tbc1d9	Sv2b
						Slc8a3	Slc2a4		Irx3	Cd8b1
						Kdelr2	Enpp1		Irx5	E330013P04Rik
						Gm14597	Slc1a5		Mmp2	Aldh1a1
						H3c15	Saraf		St3gal2	Zfp943
						Brip1os	Bcap29		Mt3	Cbx7
						Zfp703	Ccl2		Drc7	Dennd4a
						Susd5	Adcy5		Cngb1	Nebl
						C430049B03Rik	Scara3		Mmp15	Slc39a8
						Zfp111	Zwint		Slc27a1	Lgals4
						Tmem250.ps	Zfyve28		Gse1	Cd8a
						Cbx6	Kcnmb2		Crispld2	Tmem179
						Ier5l	Gm38299		Usp10	Pkp3
						Gm16574	Syt7		Pik3r2	Krt15
						Cdk5r2	Psmb9		Mbtps1	Slfn5
						Srpx	Sptlc2		Rab3a	Cadps
						Myl6	Afm		Comp	Thnsl2
						Hspa1b	Hoxb4		Dctn1	Pla2r1
						Col6a5	Ndnf		Cdh5	Slc8a1
						Asmt	X5830411N06Rik		Smpd3	X5830411N06Rik
						Lrit3	Bbox1		Tmem231	Hmgb2
						Gm21887	Mapk11		Bcar1	Phactr1
						H1f0	F7		Aars	Lmntd1
						Snhg18	Ighv9.1		Acad8	Nyap2
						Gm26917	Nudt16		X2310022B05Rik	Cntn1
						Gm10535	Vrk1		Clmp	Smyd3
						Ptprv	Zfp385b		Rexo2	C1ra
						Pcdhgc3	Entpd1		Srpr	Slc6a2
						Gm43618	Itgax		Bace1	Map6
						Gm42517	Usp54		Hyou1	H2.Q5
						Gm43610	Igkv6.32		C2cd2l	Cd47
						Zfp862.ps	Adh1		Slc37a2	Epm2a
						Samd4b	Lpxn		Robo4	Lair1
						D030045P18Rik	Cyb5r3		Mcam	Unc80
						Gm47887	Ms4a6d		Pin1	Dach1
						Ntn3	Grrp1		Carm1	Ppp4r1l.ps
							Irgm1		Smarca4	Irs1
							Gpr182		Dock6	Clca3a1
							Slc25a28		Polr2m	S100a8
							Ptk2b		Myo1e	Sag
							Serpina1b		Fam81a	Otulinl
							Sncg		Cgnl1	H2.T22
							Nt5c1a		Itga11	Pla2g4a
							Hck		Sh3bgrl2	Spock1
									Dnaja4	Ms4a4b
									Ptpn9	Zfp981
									Pkm	Tmem154
									Chrna3	Dsg3
									Stra6	Capg
									Col12a1	Jakmip3
									Loxl1	Ide
									Neo1	Skap1
									Impg1	Slc35f3
									Car12	Trim12c
									Plod2	AB124611
									Dapk2	BC051142
									Smad3	Bcl2
									Copb2	Apol9a
									Map4	Trim30d
									Scap	Prtn3
									Kif9	Fam204a
									Pth1r	Cacnb2
									Stac	Rpl30
									Ttc21a	Gda
									Trak1	Fcer1g
									Ryk	Kcnt1
									Gnai2	Col13a1
									Atp2c1	Pirb
									Manf	Col25a1
									Hemk1	Fcgr4
									Eml4	Ifitm6
									Atxn2l	Zfp945
									Fam189b	Pde1a
									Cd59a	Skap2
									Inppl1	Slx1b
									Tpcn1	Atl2
									D430042O09Rik	Rpl3
									Heyl	Dcc
									Gtf3c1	H2.Q7
									Rnft2	H2.Eb1
									Pkd1	Mrps9
									Fbxw8	B2m
									Arhgef17	Arr3
									Cspg4	Slc4a4
									Fkbp1a	Olfr920
									Slc16a8	Mcpt4
									Chpf	Prpf40a
									Nfatc1	H2.K1
									Micall1	Cxcl12
									Lmo7	C1qtnf7
									Gas7	Dpp6
									Atg9a	Adgrg5
									Atp1a1	Btnl7.ps
									Card10	Cyp2d22
									Tie1	Sphk1
									Ttc28	Ccdc62
									Ptprm	Cd200r4
									Kctd17	Lhfpl5
									Ptprf	Trank1
									Kdm4a	Cytl1
									Chst2	Ifit3b
									Prrg3	Fabp4
									Arhgap44	Msln
									Snap91	Syt10
									Antxr1	Gm8995
									Eri3	Tmem117
									Armcx2	Luzp2
									Adamts15	BC023105
									Angptl1	Aox1
									Rbfox2	Col23a1
									Fa2h	Tnfrsf11b
									Igf2bp2	Slc22a8
									Ndn	Lin28b
									Qsox1	Ppcdc
									Arhgap39	Klk8
									BC034090	Mro
									Mtss2	Rab44
									Dysf	Chil1
									Ppp1r16a	Cntn4
									Ston1	Aox3
									Gde1	Hhip
									Tnks1bp1	Tacc1
									Slc16a2	Zfp979
									Kcnk1	Zfp987
									Zdhhc5	Trim12a
									Hdlbp	Oas1g
									Tpst1	Myo1h
									Pomt2	Serpinb5
									Sik3	Jchain
									Emid1	H2.K2
									Ccnd3	H2.T23
									Irf2bpl	Ppp1r3c
									Gas2l1	H2.Eb2
									Loxl2	S1pr3
									Vps18	Nnat
									Gpc1	Cst7
									Foxj1	Phf11d
									Agpat1	Apol9b
									Jdp2	D430041D05Rik
									Traf3ip1	Ptprz1
									Fhod3	Gstm6
									Fam53c	Selenbp1
									Cpne2	Slc7a14
									Cmip	Adgrv1
									Slc24a1	Ctxn3
									Pkd2	Lyz1
									Caskin2	Wfdc17
									Poglut3	X4930438A08Rik
									Gjc1	Fcho1
									Zfp395	Sp140
									Ppm1h	Sp110
									Lrrn1	X4930581F22Rik
									Dbn1	Rnf213
									Sema3f	Hs3st3b1
									Prr7	Adamtsl3
									Fras1	Lrrc8b
									Gns	Dgkd
									Ttyh2	Rabepk
									Mfrp	Treml2
									Mast4	Naip5
									Tle2	Setdb2
									Gna11	Lrrn4cl
									Plvap	Ncf4
									Ano8	Apcdd1
									Cactin	A530040E14Rik
									Tjp3	Gm10354
									Rnf44	Slfn2
									Rtkn	Slfn10.ps
									Dapk3	X1500011B03Rik
									Zbtb7a	Zfp951
									Fam167a	X4933439C10Rik
									Slc24a5	Gprasp2
									Epn1	Gm5127
									Sppl2b	Gm10499
									Lcat	H2.T.ps
									Abi3bp	H2.Q6
									Ssc5d	H2.D1
									Nat14	C4b
									Gdpd5	H2.Ab1
									Sec31a	2022-03-02
									Lzts2	Ifi204
									Pdzrn3	Ifi207
									X1810055G02Rik	Ifi213
									Crb2	Pappa2
									Myo1d	Gm4951
									Mbd3	Ppp1r12b
									Frmpd1	Fam169b
									Midn	Nlrc5
									Rubcn	Adh1
									Dagla	Amy1
									Dym	Mir100hg
									Acta2	Zfas1
									Twist1	Mgst2
									Palm	Zfp950
									Zhx3	Hpse2
									Cox8a	Ifit3
									Rnf126	Grem1
									Cd276	Fibin
									Rusc2	AW112010
									Tmem63b	Nxpe3
									Ptpn23	Fads2b
									Smug1	Ly6a
									Colec12	Tmem92
									Sostdc1	Dio3
									Sh3bp4	Ass1
									Igfbp7	Trbc1
									Fstl4	Trbc2
									X9530068E07Rik	Igkv17.121
									Lum	Igkv16.104
									Ppfibp2	Igkv15.103
									Adamts2	Igkv12.98
									Ndrg4	Igkv4.91
									Ttyh3	Igkv1.88
									Spg20	Igkv13.84
									Cpz	Igkv4.80
									Chst12	Igkv4.74
									Alx1	Igkv4.72
									Plxnb2	Igkv4.70
									Etl4	Igkv4.57.1
									Tbc1d9b	Igkv4.57
									Cc2d1a	Igkv5.48
									Tmem184a	Igkv12.46
									Ago2	Igkv5.39
									Tubb4b	Igkv6.32
									Dner	Igkv8.30
									Dchs1	Igkv8.27
									Smad6	Igkv8.24
									Slc39a12	Igkv8.21
									Bcorl1	Igkv3.10
									Zdhhc9	Igkc
									Tns2	Ighg2c
									Hk1	Ighg2b
									Ss18	Ighg1
									Frem2	Ighg3
									Pax1	Ighm
									Smpd1	Ighv7.3
									Cavin3	Ighv4.1
									Rab11fip3	Ighv14.4
									Socs5	Ighv3.6
									Setd7	Ighv6.3
									Mycn	Ighv8.12
									Islr	Trgc2
									Fam193a	Trac
									Syn1	Iglv1
									Mospd3	Iglc2
									Mxd4	Zfp984
									Tbcel	Bnip3
									Larp1	Hs3st4
									Actr1b	Cyp4a12b
									Ctbp1	X1810010H24Rik
									Best1	Slfn1
									Uggt1	Evi2a
									Fam168b	Ifi47
									Shank2	Naip2
									Plekhg2	Ifi27l2a
									Tob1	Prnp
									Osbpl5	Kcnip3
									Wdtc1	Cyp4v3
									Slc20a2	Ccdc82
									Gdf7	Zan
									Inf2	H2.T10
									Ahdc1	H2.Q1
									Fermt2	Igkv13.85
									Nek5	H2.DMb1
									Fam222b	Gm7061
									Slc16a9	Mir142hg
									D630003M21Rik	Xist
									Tgm2	Gm15857
									Iars	Nctc1
									Dusp8	BC064078
									Ankrd13b	L1td1
									Bicd2	Gm15892
									Scarb1	Ighe
									Rflna	Rasgef1b
									Wnk2	A530032D15Rik
									Rara	Gimap1
									Wipf2	Gm14027
									Rapgefl1	Gm16028
									Phf2	Mndal
									Fkbp14	Mir99ahg
									Tmem237	Gm765
									Ano2	F830016B08Rik
									Notch3	H2.Q2
									Rilp	Gm20486
									Gask1a	Ighv1.53
									Sobp	Gm5784
									Trpm4	Ighv1.64
									Kcnh2	Igkv3.12
									Sgsm2	Ighv2.3
									Ankrd35	Ighv5.16
									Lasp1	Ighv1.50
									Trp53inp2	Igkv1.117
									Setd1b	Igkv14.126
									Pmepa1	Igkv10.96
									Scaf1	Igkv5.43
									Mllt6	Ighv14.1
									Olfml2b	Ighv1.22
									Nos1ap	Ighv1.42
									Polr2l	Ighv1.81
									Rgs4	Ighv1.9
									Atf5	Ighv1.54
									Cul7	Igkv6.15
									Fndc4	Igkv9.120
									Reep2	X3110021N24Rik
									Ripor1	Igha
									Phrf1	Ighv1.82
									Nfe2l1	Ighv1.39
									Creb3l2	Ighv1.7
									Scube3	Ighv1.52
									Josd2	Igkv3.5
									Shank1	Igkv3.2
									Mvb12b	Ighv1.12
									Lmx1b	Ighv1.4
									Six3	Igkv1.122
									Rap1gap2	Ighv2.9.1
									Itpkb	Ighv5.17
									Baiap2l1	Ighv14.2
									Ccdc68	Ighv1.55
									Cnst	Gm21188
									Pdk2	Igkv6.23
									Ppp1r9b	Ighv14.3
									Myo16	Igkv3.1
									Zfp503	Igkv14.111
									Chad	Sirpb1a
									L3mbtl3	Igkv6.17
									Mycbpap	Ighv10.1
									Nrn1	Ighv1.75
									Itga9	Ighv1.72
									Whrn	Gm16505
									Runx2	Ighv11.2
									Dap	Lhx8
									Ciz1	Ighv1.78
									Ppp1r10	Igkv1.135
									Sec24d	Ighv1.19
									Lgi2	Igkv12.44
									Pomt1	Ighv9.3
									Prrc2b	Igkv10.94
									Fndc3b	Ighv1.5
									Rftn1	Igkv8.19
									Prdm16	Igkv9.124
									Wfs1	Ighv1.63
									Prrx2	Igkv3.4
									Tnrc18	Psmb9
									Rsph4a	Ighv9.1
									Ubald1	Igkv4.55
									Stub1	Igkv6.14
									Vasn	A530020G20Rik
									Zmynd8	Fendrr
									Kcne2	AU020206
									Capsl	X9930014A18Rik
									Tbc1d13	Gm26902
									Orai2	Mirt1
									Cercam	Gm26813
									Tbc1d2	Igkv19.93
									Zfp335	X1700030C10Rik.1
									Rapgef1	X1700047M11Rik
									Srrm3	Gm18342
									Fgl2	Ms4a4a
									Dag1	Sh2d1b1
									Clstn1	Ighv1.15
									Stk32a	Pcdha1
									Elavl1	Ighd
									Rbms2	Ighv8.8
									Bmf	A530030E21Rik
									Kcns1	Gbp5
									Emp3	Igkv2.109
									Gas8	Iglc1
									Lrp1	Gm43534
									Daam2	X5930430L01Rik
									Ndufa4l2	Gm31520
									Map3k10	Olfr1372.ps1
									Dtx3	Gm45828
									Os9	Gm45104
									Cfap69	A230057D06Rik
									Ltbp4	Gm8189
									Lrfn2	Gm42047
									2022-03-09	Gm47173
									Zfp609	Gm47445
									Pitpnm3	Lilr4b
									Aipl1	Pbld1
									Kazn	Lilrb4a
									Dok4	Gm47015
									Oaz2	Gm47393
									Hmgn1	Gm40849
									Col16a1	X4933429O19Rik
									Sh3pxd2b	Gm49492
									Camta2	Gm49769
									Hnrnpul1	Gm49760
									Spen	AC167036.1
									Cop1	AC147806.2
									Iqsec3
									Six5
									Szrd1
									Erf
									Crocc
									Atp1a3
									Mgl2
									Npnt
									Irgq
									Lrit1
									Ramp3
									Nacad
									Ostc
									Elmo1
									Iqsec2
									Ccdc8
									Nbl1
									Zmiz2
									Pla2g5
									Elovl6
									Ak7
									Atp1b2
									Rap1gap
									B4galnt3
									Mdfic
									Pik3r1
									Fmod
									Crx
									Sdk2
									Gcn1
									Coro2b
									Kirrel
									Rnf10
									Plekha6
									Tram2
									Efhc1
									Shisa4
									Lman1
									Rnpep
									Fam222a
									Pigs
									Arhgef11
									Zbed3
									Tmcc2
									Arsb
									Cmklr1
									Gucy2f
									Mrtfa
									Hps4
									Fbrs
									Adora1
									Mfap4
									Mybph
									Tbc1d8b
									Tbc1d10b
									Ubap2l
									Cux2
									Atxn2
									Shc1
									Dusp15
									Dnali1
									Ttc9
									Tmem108
									Mrap2
									Lgr6
									Gpr153
									Nrep
									Sbk1
									Ptgir
									Synpo
									Tuba1c
									Hic1
									X2510009E07Rik
									Elfn2
									Rai2
									Fbxl7
									Mdga1
									Adamts3
									Prr33
									Zfp469
									Cilp2
									Ccr10
									Rnf182
									Aplnr
									Marveld1
									Camsap3
									Shisa2
									Zfand3
									X2510039O18Rik
									Dact1
									Tceal3
									Zbtb7c
									Plppr4
									Tmem201
									Ankrd45
									Ubtd2
									Megf8
									Rnf216
									S1pr1
									Zfp574
									Dcaf12l1
									Rtn4rl1
									Adra2c
									Zfp423
									Defb11
									Fam186a
									Olfr1033
									Dipk2a
									Spred2
									Col27a1
									Basp1
									Tmem104
									Eif4g1
									B3gat1
									Rp1l1
									Igfals
									Tmem229b
									Iqub
									Slc25a23
									Gjb2
									Cmtr2
									Sox18
									C1qtnf2
									Zfp319
									Unc119b
									Prr12
									Hrk
									Cxxc5
									Kctd11
									Rhoj
									Slc39a3
									Ckap4
									Vat1l
									Spsb4
									Cfap65
									Ankrd33
									Dusp18
									Cldn2
									Neurl4
									Flrt2
									Wbp1l
									Flrt1
									Ccdc187
									Tenm4
									Tmem72
									Col6a3
									Nwd1
									Kmt2d
									Lhfp
									Omd
									Fam171b
									Msx1
									Inka2
									Phldb1
									Mlec
									Igf2
									Nog
									Ctxn1
									Pthlh
									Insc
									Hexim1
									Rnf24
									Efna5
									Elfn1
									Armcx3
									Agtr1a
									Sorl1
									Rd3
									Prokr1
									Cdc42ep1
									Sall2
									Zfpm1
									Armcx4
									Arhgap23
									Shisa3
									Sarm1
									Adra1b
									Maml1
									Emilin3
									Slc29a4
									Cdr2l
									Sgms2
									Gja1
									Selenon
									Serpinb1b
									Gprc5c
									Lingo3
									Bzw1
									X2900026A02Rik
									Pcdh1
									Ywhag
									Ppp1r37
									Ccdc157
									Fhad1
									Zfp579
									Trim32
									Pcbp1
									Nlgn2
									Rtl8c
									Mest
									Igfn1
									Klf13
									Mtcl1
									Ostn
									Lrrc15
									Mpp3
									Ezr
									Cherp
									Robo2
									Zfp608
									Nrk
									Dnah6
									Ctif
									Fbxo31
									Rnf157
									C130021I20Rik
									Cyp2f2
									Cfap300
									X2700081O15Rik
									Myh7
									Yap1
									Pom121
									Nrgn
									Ggcx
									Tnfaip6
									Sh3pxd2a
									Aldh7a1
									Txlna
									Mat2a
									Cyhr1
									Cthrc1
									Fgfr3
									Msi1
									Tle5
									Vapb
									Tmem119
									Fsd1l
									Actn4
									Nfic
									Wdr86
									Ntrk2
									Tns1
									Fat2
									Pprc1
									Zcchc24
									Rtl6
									Tcf7l1
									Tafa3
									Tmem150a
									St3gal5
									Col8a2
									Pard6g
									Lman1l
									Foxk1
									Ilrun
									Pcbp2
									Gulp1
									Sipa1
									Gm7536
									Gsk3a
									Sphk2
									Mpp7
									Prdm2
									Pkn1
									Megf6
									Itpk1
									Fgf18
									Sema3b
									2022-09-11
									Palld
									Adamts17
									Chsy3
									Kcnh1
									Tspan7
									Spock2
									Upf1
									Syt17
									Kl
									Kcnj14
									Frem1
									Hnrnpm
									2022-09-09
									Gzmd
									Zc3h4
									Slc27a4
									Eda
									Gckr
									Kmt5c
									Ptp4a3
									Taok2
									Atxn7l3
									Zdhhc8
									Casc4
									Gtf2i
									Ap2a1
									Sp7
									Sntb1
									Tnfrsf19
									Fam78b
									Mfap2
									Atp8b2
									Intu
									Zbtb40
									Cdh3
									Zcchc14
									Dlgap4
									Ppp1r1b
									Ttr
									Ssbp3
									Ppp4r1
									Rai1
									Hs6st2
									Gspt1
									Syt9
									Tubb4a
									Sim2
									Shisal1
									Actg1
									Clip2
									Numbl
									Grm4
									Bcl9l
									Sox11
									Chd4
									Slc24a3
									Brpf3
									Fbln2
									Cnnm2
									Rab3ip
									Krt2
									mt.Nd2
									mt.Nd4
									mt.Nd5
									mt.Cytb
									Ubr4
									Slc31a1
									Pomgnt2
									Wdr6
									Insyn1
									Hmcn1
									Capn6
									Syngap1
									Pi15
									Myl9
									Rtl8a
									Bpifb6
									Tcf15
									Col8a1
									Cenpb
									Slc4a5
									Gmnc
									Zfp467
									Myadm
									Flnc
									Celsr2
									Sf3b4
									Cgn
									Arid1b
									Tmem100
									Cacng7
									Slc47a2
									B3gnt9
									Gmppb
									Scn2b
									Serpinh1
									Tlnrd1
									Rgma
									Slc17a7
									Sox13
									Rbm47
									Pnmal2
									Bicra
									Yipf3
									Syndig1l
									Map3k5
									X2410004P03Rik
									Nt5dc2
									B3gat3
									Ganab
									Hnrnpul2
									Zhx2
									Fndc1
									2022-09-05
									Tuba1a
									Cep170b
									Tmprss11a
									Sod3
									Catip
									Mxra8os
									Il11ra1
									Ggh
									Spint2
									Ehd2
									Zfp628
									Bglap2
									Fat3
									Bpifb4
									Thbd
									Hspa12b
									Itpripl1
									Pde11a
									Wipf1
									Nynrin
									Zc3h3
									Gm23935
									Gm24270
									Sox4
									Acsf2
									Klhdc7a
									Dact3
									Eif5a
									Slc45a4
									Slc8a3
									Xirp1
									Kcnj13
									Nhsl2
									Tmsb10
									Gm14597
									H3c15
									Prdm16os
									Brip1os
									Zfp703
									Gm2415
									Gm15564
									Susd5
									Isoc2a
									C430049B03Rik
									Gm24187
									Cbx6
									Gm7162
									Cdk5r2
									Myl6
									Col6a5
									Ak9
									Gm3294
									Six3os1
									Gm20619
									Asmt
									D430019H16Rik
									Samd11
									Snhg18
									Gm26684
									Gm26917
									Gm10535
									Ptprv
									Sowahc
									Gm28729
									Gm7694
									Pcdhgc3
									AI506816
									Zfp862.ps
									Samd4b
									Gm31727
									Gm47887
									Gm47480
									Ntn3
									Gm19500
									AC151602.1
