# Supplementary material for: The meningeal transcriptional response to traumatic brain injury and aging
Source: eLife. 2023 Jan 3;12:e81154. doi: 10.7554/eLife.81154 (PMC9810333; doi:10.7554/eLife.81154)
Supplement: Figure 5—source data 2. — Data shows the number of differentially expressed genes in each comparison and whether each gene was differentially expressed in each comparison. [file elife-81154-fig5-data2.xlsx]

## Sheet: Sheet1
	Down FDR	Up FDR			aged.sham.v.aged.tbi.0.1.padj.dec.txt	young.sham.v.aged.sham.0.1.padj.dec.txt	young.sham.v.young.tbi.0.1.padj.dec.txt	young.tbi.v.aged.tbi.0.1.padj.dec.txt	name			aged.sham.v.aged.tbi.0.1.padj.inc.txt	young.sham.v.aged.sham.0.1.padj.inc.txt	young.sham.v.young.tbi.0.1.padj.inc.txt	young.tbi.v.aged.tbi.0.1.padj.inc.txt	name
Young TBI vs. Aged TBI	1697	1239
Young Sham vs. Aged Sham	879	893		Aar2	0	0	0	1	Aar2		A230057D06Rik	0	0	0	1	A230057D06Rik
Aged Sham vs. Aged TBI	323	41
Young Sham vs. Young TBI	13	9		Aars	0	0	0	1	Aars		AB124611	0	0	0	1	AB124611
				Abhd8	0	0	0	1	Abhd8		Abca8b	0	0	0	1	Abca8b
				AC151602.1	0	0	0	1	AC151602.1		Abl2	0	0	0	1	Abl2
				Aco2	0	0	0	1	Aco2		Ablim2	0	0	0	1	Ablim2
				Acsf2	0	0	0	1	Acsf2		Acad10	0	0	0	1	Acad10
				Actn1	0	0	0	1	Actn1		Acer3	0	0	0	1	Acer3
				Actn4	0	0	0	1	Actn4		Acpp	0	0	0	1	Acpp
				Actr1b	0	0	0	1	Actr1b		Acsl1	0	0	0	1	Acsl1
				Adam9	0	0	0	1	Adam9		Adgrl2	0	0	0	1	Adgrl2
				Adamts15	0	0	0	1	Adamts15		Adm	0	0	0	1	Adm
				Adamts5	0	0	0	1	Adamts5		Adpgk	0	0	0	1	Adpgk
				Adarb1	0	0	0	1	Adarb1		Aldh3b1	0	0	0	1	Aldh3b1
				Adcy6	0	0	0	1	Adcy6		Aloxe3	0	0	0	1	Aloxe3
				Add1	0	0	0	1	Add1		Alx3	0	0	0	1	Alx3
				Adgre5	0	0	0	1	Adgre5		Amy1	0	0	0	1	Amy1
				Adgrl1	0	0	0	1	Adgrl1		Ankra2	0	0	0	1	Ankra2
				Adora1	0	0	0	1	Adora1		Ankrd28	0	0	0	1	Ankrd28
				Aebp1	0	0	0	1	Aebp1		Anxa1	0	0	0	1	Anxa1
				Afap1l2	0	0	0	1	Afap1l2		Aoah	0	0	0	1	Aoah
				Agap3	0	0	0	1	Agap3		Aox1	0	0	0	1	Aox1
				Ago2	0	0	0	1	Ago2		Apcdd1	0	0	0	1	Apcdd1
				Agpat4	0	0	0	1	Agpat4		Apod	0	0	0	1	Apod
				AI506816	0	0	0	1	AI506816		Arap2	0	0	0	1	Arap2
				Ak4	0	0	0	1	Ak4		Arglu1	0	0	0	1	Arglu1
				Aldh2	0	0	0	1	Aldh2		Arhgap15	0	0	0	1	Arhgap15
				Aldh7a1	0	0	0	1	Aldh7a1		Arhgap19	0	0	0	1	Arhgap19
				Amotl1	0	0	0	1	Amotl1		Arhgap5	0	0	0	1	Arhgap5
				Angptl1	0	0	0	1	Angptl1		Arhgap9	0	0	0	1	Arhgap9
				Angptl2	0	0	0	1	Angptl2		Arid4b	0	0	0	1	Arid4b
				Ankrd13b	0	0	0	1	Ankrd13b		Arl4c	0	0	0	1	Arl4c
				Ankrd40	0	0	0	1	Ankrd40		Arr3	0	0	0	1	Arr3
				Ankrd52	0	0	0	1	Ankrd52		Arrdc1	0	0	0	1	Arrdc1
				Ano2	0	0	0	1	Ano2		Arrdc4	0	0	0	1	Arrdc4
				Anxa6	0	0	0	1	Anxa6		Ascl1	0	0	0	1	Ascl1
				Ap2a1	0	0	0	1	Ap2a1		Atl2	0	0	0	1	Atl2
				Ap2a2	0	0	0	1	Ap2a2		Atp13a3	0	0	0	1	Atp13a3
				Ap2m1	0	0	0	1	Ap2m1		AW011738	0	0	0	1	AW011738
				Ap3d1	0	0	0	1	Ap3d1		B3galt1	0	0	0	1	B3galt1
				Apba3	0	0	0	1	Apba3		B3galt2	0	0	0	1	B3galt2
				Aplp1	0	0	0	1	Aplp1		B430306N03Rik	0	0	0	1	B430306N03Rik
				App	0	0	0	1	App		Baiap3	0	0	0	1	Baiap3
				Arap3	0	0	0	1	Arap3		Baz2b	0	0	0	1	Baz2b
				Arf4	0	0	0	1	Arf4		BC023105	0	0	0	1	BC023105
				Arhgap23	0	0	0	1	Arhgap23		BC064078	0	0	0	1	BC064078
				Arhgap39	0	0	0	1	Arhgap39		Bhlhe40	0	0	0	1	Bhlhe40
				Arhgap44	0	0	0	1	Arhgap44		Bhlhe41	0	0	0	1	Bhlhe41
				Arhgdia	0	0	0	1	Arhgdia		Blk	0	0	0	1	Blk
				Arhgef7	0	0	0	1	Arhgef7		Bmi1	0	0	0	1	Bmi1
				Arid1b	0	0	0	1	Arid1b		Bnip3	0	0	0	1	Bnip3
				Arl8a	0	0	0	1	Arl8a		Bst1	0	0	0	1	Bst1
				Armcx3	0	0	0	1	Armcx3		Btnl7.ps	0	0	0	1	Btnl7.ps
				Arsb	0	0	0	1	Arsb		C130074G19Rik	0	0	0	1	C130074G19Rik
				Arvcf	0	0	0	1	Arvcf		C1qtnf7	0	0	0	1	C1qtnf7
				Asap1	0	0	0	1	Asap1		C1s1	0	0	0	1	C1s1
				Atf6b	0	0	0	1	Atf6b		C2	0	0	0	1	C2
				Atg2a	0	0	0	1	Atg2a		Cacna1e	0	0	0	1	Cacna1e
				Atg9a	0	0	0	1	Atg9a		Camp	0	0	0	1	Camp
				Atp2b4	0	0	0	1	Atp2b4		Capg	0	0	0	1	Capg
				Atp2c1	0	0	0	1	Atp2c1		Car1	0	0	0	1	Car1
				Atp5b	0	0	0	1	Atp5b		Car8	0	0	0	1	Car8
				Atp5d	0	0	0	1	Atp5d		Casp12	0	0	0	1	Casp12
				Atp5g1	0	0	0	1	Atp5g1		Catsperz	0	0	0	1	Catsperz
				Atp6v0a1	0	0	0	1	Atp6v0a1		Ccdc62	0	0	0	1	Ccdc62
				Atp6v0c	0	0	0	1	Atp6v0c		Ccdc82	0	0	0	1	Ccdc82
				Atp9a	0	0	0	1	Atp9a		Ccl6	0	0	0	1	Ccl6
				Atxn2	0	0	0	1	Atxn2		Ccn1	0	0	0	1	Ccn1
				Atxn2l	0	0	0	1	Atxn2l		Ccn2	0	0	0	1	Ccn2
				AU040320	0	0	0	1	AU040320		Ccr7	0	0	0	1	Ccr7
				B4galt1	0	0	0	1	B4galt1		Ccz1	0	0	0	1	Ccz1
				Bad	0	0	0	1	Bad		Cd109	0	0	0	1	Cd109
				Bag3	0	0	0	1	Bag3		Cd163	0	0	0	1	Cd163
				Bag6	0	0	0	1	Bag6		Cd200r4	0	0	0	1	Cd200r4
				Banp	0	0	0	1	Banp		Cd209d	0	0	0	1	Cd209d
				BC034090	0	0	0	1	BC034090		Cd24a	0	0	0	1	Cd24a
				Bcl6	0	0	0	1	Bcl6		Cd28	0	0	0	1	Cd28
				Bcorl1	0	0	0	1	Bcorl1		Cd300a	0	0	0	1	Cd300a
				Bcr	0	0	0	1	Bcr		Cd300c2	0	0	0	1	Cd300c2
				Bdkrb2	0	0	0	1	Bdkrb2		Cd36	0	0	0	1	Cd36
				Best1	0	0	0	1	Best1		Cd3d	0	0	0	1	Cd3d
				Bgn	0	0	0	1	Bgn		Cd47	0	0	0	1	Cd47
				Bicd2	0	0	0	1	Bicd2		Cd69	0	0	0	1	Cd69
				Bicra	0	0	0	1	Bicra		Cd79b	0	0	0	1	Cd79b
				Bin1	0	0	0	1	Bin1		Cd83	0	0	0	1	Cd83
				Blmh	0	0	0	1	Blmh		Cdc42se2	0	0	0	1	Cdc42se2
				Bmf	0	0	0	1	Bmf		Cdcp1	0	0	0	1	Cdcp1
				Bmp1	0	0	0	1	Bmp1		Cdh1	0	0	0	1	Cdh1
				Bpifb1	0	0	0	1	Bpifb1		Cdh12	0	0	0	1	Cdh12
				Bpifb4	0	0	0	1	Bpifb4		Cdh18	0	0	0	1	Cdh18
				Bpifb6	0	0	0	1	Bpifb6		Cdk6	0	0	0	1	Cdk6
				Bpnt1	0	0	0	1	Bpnt1		Cebpe	0	0	0	1	Cebpe
				Brd4	0	0	0	1	Brd4		Celf2	0	0	0	1	Celf2
				Brpf3	0	0	0	1	Brpf3		Cep57	0	0	0	1	Cep57
				Btbd2	0	0	0	1	Btbd2		Chil1	0	0	0	1	Chil1
				Bysl	0	0	0	1	Bysl		Chil3	0	0	0	1	Chil3
				Cabin1	0	0	0	1	Cabin1		Chl1	0	0	0	1	Chl1
				Cacng7	0	0	0	1	Cacng7		Chrm3	0	0	0	1	Chrm3
				Cactin	0	0	0	1	Cactin		Chrna5	0	0	0	1	Chrna5
				Calm1	0	0	0	1	Calm1		Chst15	0	0	0	1	Chst15
				Camkk2	0	0	0	1	Camkk2		Clec14a	0	0	0	1	Clec14a
				Camsap3	0	0	0	1	Camsap3		Clec2i	0	0	0	1	Clec2i
				Camta2	0	0	0	1	Camta2		Clec4n	0	0	0	1	Clec4n
				Cand1	0	0	0	1	Cand1		Clec5a	0	0	0	1	Clec5a
				Cand2	0	0	0	1	Cand2		Clip4	0	0	0	1	Clip4
				Caprin1	0	0	0	1	Caprin1		Clybl	0	0	0	1	Clybl
				Card10	0	0	0	1	Card10		Cndp2	0	0	0	1	Cndp2
				Carm1	0	0	0	1	Carm1		Cnpy1	0	0	0	1	Cnpy1
				Casc4	0	0	0	1	Casc4		Cntln	0	0	0	1	Cntln
				Casz1	0	0	0	1	Casz1		Cntn1	0	0	0	1	Cntn1
				Cbfa2t3	0	0	0	1	Cbfa2t3		Coch	0	0	0	1	Coch
				Cbx2	0	0	0	1	Cbx2		Commd3	0	0	0	1	Commd3
				Cbx8	0	0	0	1	Cbx8		Coq8a	0	0	0	1	Coq8a
				Cc2d1a	0	0	0	1	Cc2d1a		Cox7a2l	0	0	0	1	Cox7a2l
				Ccdc124	0	0	0	1	Ccdc124		Cpeb2	0	0	0	1	Cpeb2
				Ccdc157	0	0	0	1	Ccdc157		Crebrf	0	0	0	1	Crebrf
				Ccdc187	0	0	0	1	Ccdc187		Creg1	0	0	0	1	Creg1
				Ccdc68	0	0	0	1	Ccdc68		Crlf3	0	0	0	1	Crlf3
				Ccnd3	0	0	0	1	Ccnd3		Cryzl2	0	0	0	1	Cryzl2
				Ccr10	0	0	0	1	Ccr10		Cst7	0	0	0	1	Cst7
				Cd59a	0	0	0	1	Cd59a		Ctla2a	0	0	0	1	Ctla2a
				Cdc42bpa	0	0	0	1	Cdc42bpa		Ctse	0	0	0	1	Ctse
				Cdcp3	0	0	0	1	Cdcp3		Cxcl16	0	0	0	1	Cxcl16
				Cdh23	0	0	0	1	Cdh23		Cxcr3	0	0	0	1	Cxcr3
				Cdh3	0	0	0	1	Cdh3		Cxcr6	0	0	0	1	Cxcr6
				Cdh5	0	0	0	1	Cdh5		Cybrd1	0	0	0	1	Cybrd1
				Cdhr1	0	0	0	1	Cdhr1		Cyp2d22	0	0	0	1	Cyp2d22
				Cdk16	0	0	0	1	Cdk16		Dach1	0	0	0	1	Dach1
				Cdk20	0	0	0	1	Cdk20		Dapl1	0	0	0	1	Dapl1
				Cdk2ap2	0	0	0	1	Cdk2ap2		Dazap2	0	0	0	1	Dazap2
				Cdr2l	0	0	0	1	Cdr2l		Dcc	0	0	0	1	Dcc
				Celsr2	0	0	0	1	Celsr2		Ddx60	0	0	0	1	Ddx60
				Cenpb	0	0	0	1	Cenpb		Dek	0	0	0	1	Dek
				Cfap300	0	0	0	1	Cfap300		Dennd2d	0	0	0	1	Dennd2d
				Chd4	0	0	0	1	Chd4		Dennd4a	0	0	0	1	Dennd4a
				Cherp	0	0	0	1	Cherp		Dennd5b	0	0	0	1	Dennd5b
				Chga	0	0	0	1	Chga		Dio3	0	0	0	1	Dio3
				Chpf	0	0	0	1	Chpf		Diras2	0	0	0	1	Diras2
				Chrna3	0	0	0	1	Chrna3		Dlx4	0	0	0	1	Dlx4
				Chrna4	0	0	0	1	Chrna4		Dnajc12	0	0	0	1	Dnajc12
				Chsy3	0	0	0	1	Chsy3		Dnase2a	0	0	0	1	Dnase2a
				Ciz1	0	0	0	1	Ciz1		Dok3	0	0	0	1	Dok3
				Ckb	0	0	0	1	Ckb		Dpep1	0	0	0	1	Dpep1
				Clstn3	0	0	0	1	Clstn3		Draxin	0	0	0	1	Draxin
				Cluh	0	0	0	1	Cluh		Dsg3	0	0	0	1	Dsg3
				Cmip	0	0	0	1	Cmip		E330013P04Rik	0	0	0	1	E330013P04Rik
				Cmklr1	0	0	0	1	Cmklr1		Echdc2	0	0	0	1	Echdc2
				Cnst	0	0	0	1	Cnst		Edar	0	0	0	1	Edar
				Cntnap1	0	0	0	1	Cntnap1		Efemp1	0	0	0	1	Efemp1
				Cog1	0	0	0	1	Cog1		Egfl7	0	0	0	1	Egfl7
				Col18a1	0	0	0	1	Col18a1		Eif2ak2	0	0	0	1	Eif2ak2
				Col4a1	0	0	0	1	Col4a1		Eif3e	0	0	0	1	Eif3e
				Col4a2	0	0	0	1	Col4a2		Eif5b	0	0	0	1	Eif5b
				Col5a2	0	0	0	1	Col5a2		Elmod1	0	0	0	1	Elmod1
				Col5a3	0	0	0	1	Col5a3		Epm2a	0	0	0	1	Epm2a
				Colec12	0	0	0	1	Colec12		Epsti1	0	0	0	1	Epsti1
				Cop1	0	0	0	1	Cop1		Erbin	0	0	0	1	Erbin
				Copa	0	0	0	1	Copa		Esm1	0	0	0	1	Esm1
				Copb2	0	0	0	1	Copb2		Espn	0	0	0	1	Espn
				Copg1	0	0	0	1	Copg1		Etnk1	0	0	0	1	Etnk1
				Coro1c	0	0	0	1	Coro1c		Evi2a	0	0	0	1	Evi2a
				Cox8a	0	0	0	1	Cox8a		F830016B08Rik	0	0	0	1	F830016B08Rik
				Cpne2	0	0	0	1	Cpne2		Fabp4	0	0	0	1	Fabp4
				Creb3l2	0	0	0	1	Creb3l2		Fabp5	0	0	0	1	Fabp5
				Creld1	0	0	0	1	Creld1		Fads2b	0	0	0	1	Fads2b
				Creld2	0	0	0	1	Creld2		Fam135b	0	0	0	1	Fam135b
				Crip2	0	0	0	1	Crip2		Fam180a	0	0	0	1	Fam180a
				Crispld2	0	0	0	1	Crispld2		Fam204a	0	0	0	1	Fam204a
				Crocc	0	0	0	1	Crocc		Fam217a	0	0	0	1	Fam217a
				Crtc1	0	0	0	1	Crtc1		Fam49b	0	0	0	1	Fam49b
				Crtc3	0	0	0	1	Crtc3		Fam76b	0	0	0	1	Fam76b
				Crx	0	0	0	1	Crx		Fbln5	0	0	0	1	Fbln5
				Crybb3	0	0	0	1	Crybb3		Fcho1	0	0	0	1	Fcho1
				Csad	0	0	0	1	Csad		Fcna	0	0	0	1	Fcna
				Cspg4	0	0	0	1	Cspg4		Fcnb	0	0	0	1	Fcnb
				Csrp2	0	0	0	1	Csrp2		Fermt3	0	0	0	1	Fermt3
				Ctbp1	0	0	0	1	Ctbp1		Ffar2	0	0	0	1	Ffar2
				Ctif	0	0	0	1	Ctif		Fgd2	0	0	0	1	Fgd2
				Ctsk	0	0	0	1	Ctsk		Fhl2	0	0	0	1	Fhl2
				Cttn	0	0	0	1	Cttn		Fibin	0	0	0	1	Fibin
				Ctxn1	0	0	0	1	Ctxn1		Fmo2	0	0	0	1	Fmo2
				Cxxc1	0	0	0	1	Cxxc1		Fmo4	0	0	0	1	Fmo4
				Cxxc5	0	0	0	1	Cxxc5		Folh1	0	0	0	1	Folh1
				D430019H16Rik	0	0	0	1	D430019H16Rik		Foxp1	0	0	0	1	Foxp1
				D430042O09Rik	0	0	0	1	D430042O09Rik		Fpr2	0	0	0	1	Fpr2
				Dab2ip	0	0	0	1	Dab2ip		Fst	0	0	0	1	Fst
				Dag1	0	0	0	1	Dag1		Fyb	0	0	0	1	Fyb
				Dagla	0	0	0	1	Dagla		Fzd9	0	0	0	1	Fzd9
				Dalrd3	0	0	0	1	Dalrd3		G6pdx	0	0	0	1	G6pdx
				Dapk1	0	0	0	1	Dapk1		Galnt15	0	0	0	1	Galnt15
				Dapk3	0	0	0	1	Dapk3		Gask1b	0	0	0	1	Gask1b
				Dct	0	0	0	1	Dct		Gbgt1	0	0	0	1	Gbgt1
				Dctn1	0	0	0	1	Dctn1		Gbp7	0	0	0	1	Gbp7
				Dhx16	0	0	0	1	Dhx16		Gcnt1	0	0	0	1	Gcnt1
				Dio2	0	0	0	1	Dio2		Gda	0	0	0	1	Gda
				Dlg5	0	0	0	1	Dlg5		Gem	0	0	0	1	Gem
				Dlgap4	0	0	0	1	Dlgap4		Gh	0	0	0	1	Gh
				Dlst	0	0	0	1	Dlst		Gimap1	0	0	0	1	Gimap1
				Dlx6	0	0	0	1	Dlx6		Glipr2	0	0	0	1	Glipr2
				Dnaja4	0	0	0	1	Dnaja4		Gm10354	0	0	0	1	Gm10354
				Dnajb11	0	0	0	1	Dnajb11		Gm14027	0	0	0	1	Gm14027
				Dok4	0	0	0	1	Dok4		Gm15857	0	0	0	1	Gm15857
				Drosha	0	0	0	1	Drosha		Gm15892	0	0	0	1	Gm15892
				Dstn	0	0	0	1	Dstn		Gm16026	0	0	0	1	Gm16026
				Dtx3	0	0	0	1	Dtx3		Gm21188	0	0	0	1	Gm21188
				Dusp15	0	0	0	1	Dusp15		Gm26782	0	0	0	1	Gm26782
				Dvl1	0	0	0	1	Dvl1		Gm26813	0	0	0	1	Gm26813
				Dvl3	0	0	0	1	Dvl3		Gm26902	0	0	0	1	Gm26902
				Dym	0	0	0	1	Dym		Gm45104	0	0	0	1	Gm45104
				Dyrk1b	0	0	0	1	Dyrk1b		Gm45828	0	0	0	1	Gm45828
				Dysf	0	0	0	1	Dysf		Gm47015	0	0	0	1	Gm47015
				Efhc1	0	0	0	1	Efhc1		Gm47173	0	0	0	1	Gm47173
				Ehd1	0	0	0	1	Ehd1		Gm47445	0	0	0	1	Gm47445
				Ehd2	0	0	0	1	Ehd2		Gm49492	0	0	0	1	Gm49492
				Eif4g1	0	0	0	1	Eif4g1		Gm49760	0	0	0	1	Gm49760
				Eif4g3	0	0	0	1	Eif4g3		Gm5784	0	0	0	1	Gm5784
				Eif5a	0	0	0	1	Eif5a		Gm7061	0	0	0	1	Gm7061
				Elavl1	0	0	0	1	Elavl1		Gm765	0	0	0	1	Gm765
				Elmo2	0	0	0	1	Elmo2		Gm8189	0	0	0	1	Gm8189
				Eln	0	0	0	1	Eln		Gmds	0	0	0	1	Gmds
				Elovl6	0	0	0	1	Elovl6		Gpam	0	0	0	1	Gpam
				Eml4	0	0	0	1	Eml4		Gpr132	0	0	0	1	Gpr132
				Emp1	0	0	0	1	Emp1		Gpr156	0	0	0	1	Gpr156
				Emp3	0	0	0	1	Emp3		Gpr18	0	0	0	1	Gpr18
				Eng	0	0	0	1	Eng		Gprasp2	0	0	0	1	Gprasp2
				Eno2	0	0	0	1	Eno2		Greb1	0	0	0	1	Greb1
				Entr1	0	0	0	1	Entr1		Grem2	0	0	0	1	Grem2
				Epb41l1	0	0	0	1	Epb41l1		Grhl1	0	0	0	1	Grhl1
				Ephb4	0	0	0	1	Ephb4		Gria1	0	0	0	1	Gria1
				Erf	0	0	0	1	Erf		Grk3	0	0	0	1	Grk3
				Ergic1	0	0	0	1	Ergic1		Gsta4	0	0	0	1	Gsta4
				Eri3	0	0	0	1	Eri3		Gstm2	0	0	0	1	Gstm2
				Esrrb	0	0	0	1	Esrrb		Gstm5	0	0	0	1	Gstm5
				Etl4	0	0	0	1	Etl4		Gstm6	0	0	0	1	Gstm6
				Exoc3l2	0	0	0	1	Exoc3l2		Gstt2	0	0	0	1	Gstt2
				Extl3	0	0	0	1	Extl3		Gtdc1	0	0	0	1	Gtdc1
				Eya2	0	0	0	1	Eya2		Gyg	0	0	0	1	Gyg
				F2rl1	0	0	0	1	F2rl1		H2.Aa	0	0	0	1	H2.Aa
				Fa2h	0	0	0	1	Fa2h		H2.DMa	0	0	0	1	H2.DMa
				Faap100	0	0	0	1	Faap100		H2.DMb1	0	0	0	1	H2.DMb1
				Fam129b	0	0	0	1	Fam129b		H2.M2	0	0	0	1	H2.M2
				Fam168b	0	0	0	1	Fam168b		H2.Ob	0	0	0	1	H2.Ob
				Fam189b	0	0	0	1	Fam189b		H2.Q2	0	0	0	1	H2.Q2
				Fam193a	0	0	0	1	Fam193a		Hcar1	0	0	0	1	Hcar1
				Fam222b	0	0	0	1	Fam222b		Herc3	0	0	0	1	Herc3
				Fam234a	0	0	0	1	Fam234a		Herc6	0	0	0	1	Herc6
				Fam78b	0	0	0	1	Fam78b		Hipk1	0	0	0	1	Hipk1
				Fap	0	0	0	1	Fap		Hmox1	0	0	0	1	Hmox1
				Fasn	0	0	0	1	Fasn		Hnmt	0	0	0	1	Hnmt
				Fbln2	0	0	0	1	Fbln2		Hpgds	0	0	0	1	Hpgds
				Fbxl7	0	0	0	1	Fbxl7		Hps3	0	0	0	1	Hps3
				Fbxo31	0	0	0	1	Fbxo31		Hpse2	0	0	0	1	Hpse2
				Fbxw8	0	0	0	1	Fbxw8		Hs3st1	0	0	0	1	Hs3st1
				Fdxr	0	0	0	1	Fdxr		Hs3st3b1	0	0	0	1	Hs3st3b1
				Fgf18	0	0	0	1	Fgf18		Hs3st4	0	0	0	1	Hs3st4
				Fgfr1	0	0	0	1	Fgfr1		Hsf2bp	0	0	0	1	Hsf2bp
				Fkbp1a	0	0	0	1	Fkbp1a		Htatip2	0	0	0	1	Htatip2
				Flii	0	0	0	1	Flii		Icos	0	0	0	1	Icos
				Flnc	0	0	0	1	Flnc		Id1	0	0	0	1	Id1
				Flrt2	0	0	0	1	Flrt2		Id4	0	0	0	1	Id4
				Flt4	0	0	0	1	Flt4		Ifi47	0	0	0	1	Ifi47
				Fmnl3	0	0	0	1	Fmnl3		Ighe	0	0	0	1	Ighe
				Fndc3b	0	0	0	1	Fndc3b		Ighg2c	0	0	0	1	Ighg2c
				Foxj2	0	0	0	1	Foxj2		Ighv1.12	0	0	0	1	Ighv1.12
				Foxk1	0	0	0	1	Foxk1		Ighv1.15	0	0	0	1	Ighv1.15
				Fras1	0	0	0	1	Fras1		Ighv1.22	0	0	0	1	Ighv1.22
				Frmpd1	0	0	0	1	Frmpd1		Ighv1.4	0	0	0	1	Ighv1.4
				Fsd1l	0	0	0	1	Fsd1l		Ighv1.42	0	0	0	1	Ighv1.42
				Fstl1	0	0	0	1	Fstl1		Ighv1.52	0	0	0	1	Ighv1.52
				Fth1	0	0	0	1	Fth1		Ighv1.75	0	0	0	1	Ighv1.75
				Furin	0	0	0	1	Furin		Ighv1.78	0	0	0	1	Ighv1.78
				Gaa	0	0	0	1	Gaa		Ighv10.1	0	0	0	1	Ighv10.1
				Galr2	0	0	0	1	Galr2		Ighv11.2	0	0	0	1	Ighv11.2
				Ganab	0	0	0	1	Ganab		Ighv14.1	0	0	0	1	Ighv14.1
				Gas2l1	0	0	0	1	Gas2l1		Ighv14.3	0	0	0	1	Ighv14.3
				Gas7	0	0	0	1	Gas7		Ighv2.9.1	0	0	0	1	Ighv2.9.1
				Gas8	0	0	0	1	Gas8		Ighv5.16	0	0	0	1	Ighv5.16
				Gbf1	0	0	0	1	Gbf1		Ighv6.3	0	0	0	1	Ighv6.3
				Gcn1	0	0	0	1	Gcn1		Ighv7.3	0	0	0	1	Ighv7.3
				Gdf11	0	0	0	1	Gdf11		Ighv8.12	0	0	0	1	Ighv8.12
				Gdi1	0	0	0	1	Gdi1		Ighv8.8	0	0	0	1	Ighv8.8
				Gdpd5	0	0	0	1	Gdpd5		Igkv1.122	0	0	0	1	Igkv1.122
				Gga2	0	0	0	1	Gga2		Igkv12.46	0	0	0	1	Igkv12.46
				Ggcx	0	0	0	1	Ggcx		Igkv13.84	0	0	0	1	Igkv13.84
				Ggh	0	0	0	1	Ggh		Igkv14.126	0	0	0	1	Igkv14.126
				Gjb2	0	0	0	1	Gjb2		Igkv17.121	0	0	0	1	Igkv17.121
				Gjc1	0	0	0	1	Gjc1		Igkv19.93	0	0	0	1	Igkv19.93
				Glmp	0	0	0	1	Glmp		Igkv3.1	0	0	0	1	Igkv3.1
				Glrx3	0	0	0	1	Glrx3		Igkv3.4	0	0	0	1	Igkv3.4
				Gm15564	0	0	0	1	Gm15564		Igkv4.57	0	0	0	1	Igkv4.57
				Gm20619	0	0	0	1	Gm20619		Igkv4.72	0	0	0	1	Igkv4.72
				Gm2415	0	0	0	1	Gm2415		Igkv6.14	0	0	0	1	Igkv6.14
				Gm24187	0	0	0	1	Gm24187		Igkv6.23	0	0	0	1	Igkv6.23
				Gm31727	0	0	0	1	Gm31727		Igkv8.24	0	0	0	1	Igkv8.24
				Gm3294	0	0	0	1	Gm3294		Igkv8.30	0	0	0	1	Igkv8.30
				Gm47480	0	0	0	1	Gm47480		Il10ra	0	0	0	1	Il10ra
				Gm7162	0	0	0	1	Gm7162		Il13ra1	0	0	0	1	Il13ra1
				Gm7536	0	0	0	1	Gm7536		Il1r1	0	0	0	1	Il1r1
				Gm7694	0	0	0	1	Gm7694		Impact	0	0	0	1	Impact
				Gmppb	0	0	0	1	Gmppb		Irs1	0	0	0	1	Irs1
				Gna11	0	0	0	1	Gna11		Itga4	0	0	0	1	Itga4
				Gnai2	0	0	0	1	Gnai2		Itih3	0	0	0	1	Itih3
				Gnat2	0	0	0	1	Gnat2		Itk	0	0	0	1	Itk
				Gnb3	0	0	0	1	Gnb3		Itm2c	0	0	0	1	Itm2c
				Gns	0	0	0	1	Gns		Kcne4	0	0	0	1	Kcne4
				Got1	0	0	0	1	Got1		Kcnip2	0	0	0	1	Kcnip2
				Got2	0	0	0	1	Got2		Kcnip3	0	0	0	1	Kcnip3
				Gpat4	0	0	0	1	Gpat4		Kcnt2	0	0	0	1	Kcnt2
				Gpx6	0	0	0	1	Gpx6		Kdm5a	0	0	0	1	Kdm5a
				Grasp	0	0	0	1	Grasp		Khk	0	0	0	1	Khk
				Gse1	0	0	0	1	Gse1		Kif26b	0	0	0	1	Kif26b
				Gsn	0	0	0	1	Gsn		Kif4	0	0	0	1	Kif4
				Gspt1	0	0	0	1	Gspt1		Kit	0	0	0	1	Kit
				Gtf2i	0	0	0	1	Gtf2i		Klk10	0	0	0	1	Klk10
				Gtf3c1	0	0	0	1	Gtf3c1		Klk14	0	0	0	1	Klk14
				Gucy2f	0	0	0	1	Gucy2f		Klk8	0	0	0	1	Klk8
				Guk1	0	0	0	1	Guk1		Krt15	0	0	0	1	Krt15
				Gzmd	0	0	0	1	Gzmd		Lacc1	0	0	0	1	Lacc1
				Gzme	0	0	0	1	Gzme		Lamb3	0	0	0	1	Lamb3
				Hadha	0	0	0	1	Hadha		Lamc2	0	0	0	1	Lamc2
				Hapln4	0	0	0	1	Hapln4		Lat	0	0	0	1	Lat
				Hcfc1	0	0	0	1	Hcfc1		Lcn2	0	0	0	1	Lcn2
				Hcn2	0	0	0	1	Hcn2		Lgals3	0	0	0	1	Lgals3
				Hdgf	0	0	0	1	Hdgf		Lgals4	0	0	0	1	Lgals4
				Hdlbp	0	0	0	1	Hdlbp		Lgals9	0	0	0	1	Lgals9
				Hexim1	0	0	0	1	Hexim1		Lgmn	0	0	0	1	Lgmn
				Hgs	0	0	0	1	Hgs		Lhx8	0	0	0	1	Lhx8
				Higd2a	0	0	0	1	Higd2a		Lilrb4a	0	0	0	1	Lilrb4a
				Hivep3	0	0	0	1	Hivep3		Lin28b	0	0	0	1	Lin28b
				Hk1	0	0	0	1	Hk1		Lmntd1	0	0	0	1	Lmntd1
				Hmg20b	0	0	0	1	Hmg20b		Lmo2	0	0	0	1	Lmo2
				Hmgn1	0	0	0	1	Hmgn1		Lmo4	0	0	0	1	Lmo4
				Hnrnpab	0	0	0	1	Hnrnpab		Lrrn4cl	0	0	0	1	Lrrn4cl
				Hnrnpm	0	0	0	1	Hnrnpm		Ltb4r1	0	0	0	1	Ltb4r1
				Hnrnpul1	0	0	0	1	Hnrnpul1		Lurap1l	0	0	0	1	Lurap1l
				Hnrnpul2	0	0	0	1	Hnrnpul2		Ly6g	0	0	0	1	Ly6g
				Hps4	0	0	0	1	Hps4		Ly86	0	0	0	1	Ly86
				Hrk	0	0	0	1	Hrk		Lyz1	0	0	0	1	Lyz1
				Hs6st2	0	0	0	1	Hs6st2		Mad2l2	0	0	0	1	Mad2l2
				Hsp90b1	0	0	0	1	Hsp90b1		Malsu1	0	0	0	1	Malsu1
				Hspa12b	0	0	0	1	Hspa12b		Malt1	0	0	0	1	Malt1
				Hspa4	0	0	0	1	Hspa4		Maoa	0	0	0	1	Maoa
				Hspa4l	0	0	0	1	Hspa4l		2022-03-01	0	0	0	1	Mar1
				Hspa5	0	0	0	1	Hspa5		2022-03-02	0	0	0	1	Mar2
				Hspa8	0	0	0	1	Hspa8		2022-03-06	0	0	0	1	Mar6
				Hspd1	0	0	0	1	Hspd1		2022-03-07	0	0	0	1	Mar7
				Hsph1	0	0	0	1	Hsph1		Mcoln2	0	0	0	1	Mcoln2
				Iars	0	0	0	1	Iars		Mctp1	0	0	0	1	Mctp1
				Igfals	0	0	0	1	Igfals		Mecom	0	0	0	1	Mecom
				Ilrun	0	0	0	1	Ilrun		Mgst2	0	0	0	1	Mgst2
				Inf2	0	0	0	1	Inf2		Mid1ip1	0	0	0	1	Mid1ip1
				Inka2	0	0	0	1	Inka2		Mill2	0	0	0	1	Mill2
				Inppl1	0	0	0	1	Inppl1		Milr1	0	0	0	1	Milr1
				Ins2	0	0	0	1	Ins2		Mipol1	0	0	0	1	Mipol1
				Insyn1	0	0	0	1	Insyn1		Mir100hg	0	0	0	1	Mir100hg
				Ints1	0	0	0	1	Ints1		Mir99ahg	0	0	0	1	Mir99ahg
				Ints3	0	0	0	1	Ints3		Mirt1	0	0	0	1	Mirt1
				Intu	0	0	0	1	Intu		Mllt3	0	0	0	1	Mllt3
				Iqsec2	0	0	0	1	Iqsec2		Mmp25	0	0	0	1	Mmp25
				Irf2bpl	0	0	0	1	Irf2bpl		Mocos	0	0	0	1	Mocos
				Irgq	0	0	0	1	Irgq		Mrps9	0	0	0	1	Mrps9
				Islr	0	0	0	1	Islr		Ms4a2	0	0	0	1	Ms4a2
				Isoc2a	0	0	0	1	Isoc2a		Ms4a4a	0	0	0	1	Ms4a4a
				Itga3	0	0	0	1	Itga3		Ms4a7	0	0	0	1	Ms4a7
				Itga6	0	0	0	1	Itga6		Mtmr14	0	0	0	1	Mtmr14
				Itga7	0	0	0	1	Itga7		Mtx3	0	0	0	1	Mtx3
				Itga9	0	0	0	1	Itga9		Muc20	0	0	0	1	Muc20
				Itgb5	0	0	0	1	Itgb5		Myb	0	0	0	1	Myb
				Itih5	0	0	0	1	Itih5		Mylf.ps	0	0	0	1	Mylf.ps
				Itpkb	0	0	0	1	Itpkb		Myo1h	0	0	0	1	Myo1h
				Itpr1	0	0	0	1	Itpr1		Myom1	0	0	0	1	Myom1
				Jade2	0	0	0	1	Jade2		Naaa	0	0	0	1	Naaa
				Jdp2	0	0	0	1	Jdp2		Nadk2	0	0	0	1	Nadk2
				Josd2	0	0	0	1	Josd2		Ncf4	0	0	0	1	Ncf4
				Jph4	0	0	0	1	Jph4		Nemf	0	0	0	1	Nemf
				Jup	0	0	0	1	Jup		Neurod1	0	0	0	1	Neurod1
				Kazn	0	0	0	1	Kazn		Neurod4	0	0	0	1	Neurod4
				Kcne2	0	0	0	1	Kcne2		Nexn	0	0	0	1	Nexn
				Kcnj14	0	0	0	1	Kcnj14		Nfkbia	0	0	0	1	Nfkbia
				Kcnq4	0	0	0	1	Kcnq4		Ngp	0	0	0	1	Ngp
				Kctd11	0	0	0	1	Kctd11		Nmnat3	0	0	0	1	Nmnat3
				Kctd17	0	0	0	1	Kctd17		Nqo1	0	0	0	1	Nqo1
				Kdm4a	0	0	0	1	Kdm4a		Nr3c2	0	0	0	1	Nr3c2
				Kif1c	0	0	0	1	Kif1c		Nrxn2	0	0	0	1	Nrxn2
				Klf13	0	0	0	1	Klf13		Nxpe5	0	0	0	1	Nxpe5
				Krt2	0	0	0	1	Krt2		Nyx	0	0	0	1	Nyx
				Krt75	0	0	0	1	Krt75		Oard1	0	0	0	1	Oard1
				Ksr1	0	0	0	1	Ksr1		Ofd1	0	0	0	1	Ofd1
				L3mbtl3	0	0	0	1	L3mbtl3		Ogfrl1	0	0	0	1	Ogfrl1
				Lama3	0	0	0	1	Lama3		Olfr920	0	0	0	1	Olfr920
				Lamc1	0	0	0	1	Lamc1		Otulinl	0	0	0	1	Otulinl
				Laptm4a	0	0	0	1	Laptm4a		P2rx7	0	0	0	1	P2rx7
				Larp1	0	0	0	1	Larp1		P2ry10	0	0	0	1	P2ry10
				Letm1	0	0	0	1	Letm1		Pacsin3	0	0	0	1	Pacsin3
				Lgr6	0	0	0	1	Lgr6		Padi1	0	0	0	1	Padi1
				Lhfp	0	0	0	1	Lhfp		Padi3	0	0	0	1	Padi3
				Lhx4	0	0	0	1	Lhx4		Padi4	0	0	0	1	Padi4
				Lingo3	0	0	0	1	Lingo3		Padi6	0	0	0	1	Padi6
				Llgl1	0	0	0	1	Llgl1		Pafah1b3	0	0	0	1	Pafah1b3
				Lman1l	0	0	0	1	Lman1l		Pak3	0	0	0	1	Pak3
				Lman2	0	0	0	1	Lman2		Parp12	0	0	0	1	Parp12
				Lmf2	0	0	0	1	Lmf2		Paxx	0	0	0	1	Paxx
				Loxl3	0	0	0	1	Loxl3		Pbld1	0	0	0	1	Pbld1
				Lrfn2	0	0	0	1	Lrfn2		Pcdh17	0	0	0	1	Pcdh17
				Lrig1	0	0	0	1	Lrig1		Pcdha1	0	0	0	1	Pcdha1
				Lrit1	0	0	0	1	Lrit1		Pcdhb14	0	0	0	1	Pcdhb14
				Lrp1	0	0	0	1	Lrp1		Pcgf5	0	0	0	1	Pcgf5
				Lrp10	0	0	0	1	Lrp10		Pcsk4	0	0	0	1	Pcsk4
				Lrp3	0	0	0	1	Lrp3		Pde9a	0	0	0	1	Pde9a
				Lrrc59	0	0	0	1	Lrrc59		Pdgfd	0	0	0	1	Pdgfd
				Lrrn2	0	0	0	1	Lrrn2		Pdk1	0	0	0	1	Pdk1
				Lsp1	0	0	0	1	Lsp1		Pfkfb3	0	0	0	1	Pfkfb3
				Ltbp1	0	0	0	1	Ltbp1		Pfn2	0	0	0	1	Pfn2
				Ltbp4	0	0	0	1	Ltbp4		Pgm5	0	0	0	1	Pgm5
				Ltbr	0	0	0	1	Ltbr		Phip	0	0	0	1	Phip
				Lum	0	0	0	1	Lum		Phka2	0	0	0	1	Phka2
				Lynx1	0	0	0	1	Lynx1		Phldb2	0	0	0	1	Phldb2
				Lzts2	0	0	0	1	Lzts2		Pik3cg	0	0	0	1	Pik3cg
				Mall	0	0	0	1	Mall		Pilra	0	0	0	1	Pilra
				Maml1	0	0	0	1	Maml1		Pkhd1l1	0	0	0	1	Pkhd1l1
				Manf	0	0	0	1	Manf		Pkp3	0	0	0	1	Pkp3
				Map1a	0	0	0	1	Map1a		Pla2g2d	0	0	0	1	Pla2g2d
				Map1s	0	0	0	1	Map1s		Pla2r1	0	0	0	1	Pla2r1
				Map3k12	0	0	0	1	Map3k12		Pld4	0	0	0	1	Pld4
				Map3k5	0	0	0	1	Map3k5		Plgrkt	0	0	0	1	Plgrkt
				Map4	0	0	0	1	Map4		Plin2	0	0	0	1	Plin2
				Map4k4	0	0	0	1	Map4k4		Plk3	0	0	0	1	Plk3
				Mapk8ip1	0	0	0	1	Mapk8ip1		Pls1	0	0	0	1	Pls1
				Mapre3	0	0	0	1	Mapre3		Pmaip1	0	0	0	1	Pmaip1
				Mark2	0	0	0	1	Mark2		Pnck	0	0	0	1	Pnck
				Marveld1	0	0	0	1	Marveld1		Pnma2	0	0	0	1	Pnma2
				Mast2	0	0	0	1	Mast2		Polr3gl	0	0	0	1	Polr3gl
				Mast4	0	0	0	1	Mast4		Pparg	0	0	0	1	Pparg
				Mbd3	0	0	0	1	Mbd3		Ppbp	0	0	0	1	Ppbp
				Mboat2	0	0	0	1	Mboat2		Ppcdc	0	0	0	1	Ppcdc
				Mcam	0	0	0	1	Mcam		Ppl	0	0	0	1	Ppl
				Mcf2l	0	0	0	1	Mcf2l		Ppp1r12b	0	0	0	1	Ppp1r12b
				Med15	0	0	0	1	Med15		Ppp1r14c	0	0	0	1	Ppp1r14c
				Med24	0	0	0	1	Med24		Ppp1r3c	0	0	0	1	Ppp1r3c
				Med25	0	0	0	1	Med25		Ppp2r3a	0	0	0	1	Ppp2r3a
				Megf8	0	0	0	1	Megf8		Ppp4r1l.ps	0	0	0	1	Ppp4r1l.ps
				Metrn	0	0	0	1	Metrn		Prg4	0	0	0	1	Prg4
				Mettl3	0	0	0	1	Mettl3		Prkag3	0	0	0	1	Prkag3
				Mfn2	0	0	0	1	Mfn2		Prkar1b	0	0	0	1	Prkar1b
				Mgat1	0	0	0	1	Mgat1		Prkcb	0	0	0	1	Prkcb
				Mgl2	0	0	0	1	Mgl2		Prpf40a	0	0	0	1	Prpf40a
				Mgp	0	0	0	1	Mgp		Prune2	0	0	0	1	Prune2
				Micall1	0	0	0	1	Micall1		Prxl2b	0	0	0	1	Prxl2b
				Midn	0	0	0	1	Midn		Psd3	0	0	0	1	Psd3
				Mink1	0	0	0	1	Mink1		Ptbp3	0	0	0	1	Ptbp3
				Mipep	0	0	0	1	Mipep		Ptgs2	0	0	0	1	Ptgs2
				Mkks	0	0	0	1	Mkks		Ptpn3	0	0	0	1	Ptpn3
				Mllt6	0	0	0	1	Mllt6		Ptprz1	0	0	0	1	Ptprz1
				Mmp14	0	0	0	1	Mmp14		Pttg1	0	0	0	1	Pttg1
				Mmp17	0	0	0	1	Mmp17		Pygl	0	0	0	1	Pygl
				Mmp2	0	0	0	1	Mmp2		Rad50	0	0	0	1	Rad50
				Mnt	0	0	0	1	Mnt		Rasgrp1	0	0	0	1	Rasgrp1
				Mon1b	0	0	0	1	Mon1b		Rassf5	0	0	0	1	Rassf5
				Mpp7	0	0	0	1	Mpp7		Rbbp6	0	0	0	1	Rbbp6
				Mpped2	0	0	0	1	Mpped2		Rbm24	0	0	0	1	Rbm24
				Mprip	0	0	0	1	Mprip		Rbm25	0	0	0	1	Rbm25
				Mrgprf	0	0	0	1	Mrgprf		Rbm3	0	0	0	1	Rbm3
				Mrtfa	0	0	0	1	Mrtfa		Rbm7	0	0	0	1	Rbm7
				mt.Cytb	0	0	0	1	mt.Cytb		Rbp4	0	0	0	1	Rbp4
				mt.Nd2	0	0	0	1	mt.Nd2		Rcsd1	0	0	0	1	Rcsd1
				mt.Nd4	0	0	0	1	mt.Nd4		Rgs14	0	0	0	1	Rgs14
				mt.Nd5	0	0	0	1	mt.Nd5		Rgs22	0	0	0	1	Rgs22
				Mta1	0	0	0	1	Mta1		Rgs9	0	0	0	1	Rgs9
				Mtch1	0	0	0	1	Mtch1		Rhoh	0	0	0	1	Rhoh
				Mtcl1	0	0	0	1	Mtcl1		Rims3	0	0	0	1	Rims3
				Mthfr	0	0	0	1	Mthfr		Rnase4	0	0	0	1	Rnase4
				Mvb12b	0	0	0	1	Mvb12b		Rnd3	0	0	0	1	Rnd3
				Mxra7	0	0	0	1	Mxra7		Rnf144b	0	0	0	1	Rnf144b
				Mxra8os	0	0	0	1	Mxra8os		Rpl12	0	0	0	1	Rpl12
				Mybph	0	0	0	1	Mybph		Rpl14	0	0	0	1	Rpl14
				Myh10	0	0	0	1	Myh10		Rpl22	0	0	0	1	Rpl22
				Myh11	0	0	0	1	Myh11		Rpl3	0	0	0	1	Rpl3
				Myh9	0	0	0	1	Myh9		Rpl30	0	0	0	1	Rpl30
				Myo16	0	0	0	1	Myo16		Rps19	0	0	0	1	Rps19
				Myo18a	0	0	0	1	Myo18a		Rps6ka1	0	0	0	1	Rps6ka1
				Myo19	0	0	0	1	Myo19		Rps6ka5	0	0	0	1	Rps6ka5
				Myo1b	0	0	0	1	Myo1b		Rsbn1l	0	0	0	1	Rsbn1l
				Myo1c	0	0	0	1	Myo1c		Rspo2	0	0	0	1	Rspo2
				Myo1d	0	0	0	1	Myo1d		Rspo3	0	0	0	1	Rspo3
				Myo1e	0	0	0	1	Myo1e		Rsrp1	0	0	0	1	Rsrp1
				N4bp3	0	0	0	1	N4bp3		Rxrg	0	0	0	1	Rxrg
				Naa60	0	0	0	1	Naa60		Ryr2	0	0	0	1	Ryr2
				Nacad	0	0	0	1	Nacad		S100a14	0	0	0	1	S100a14
				Nacc1	0	0	0	1	Nacc1		S100a8	0	0	0	1	S100a8
				Nacc2	0	0	0	1	Nacc2		S1pr3	0	0	0	1	S1pr3
				Napa	0	0	0	1	Napa		Saa3	0	0	0	1	Saa3
				Nat14	0	0	0	1	Nat14		Sag	0	0	0	1	Sag
				Nav1	0	0	0	1	Nav1		Sall4	0	0	0	1	Sall4
				Nbl1	0	0	0	1	Nbl1		Sash3	0	0	0	1	Sash3
				Ncdn	0	0	0	1	Ncdn		Sat1	0	0	0	1	Sat1
				Nckap5l	0	0	0	1	Nckap5l		Scrt1	0	0	0	1	Scrt1
				Ncln	0	0	0	1	Ncln		Selenbp1	0	0	0	1	Selenbp1
				Ndrg4	0	0	0	1	Ndrg4		Sell	0	0	0	1	Sell
				Ndufa4l2	0	0	0	1	Ndufa4l2		Sema3c	0	0	0	1	Sema3c
				Ndufb2	0	0	0	1	Ndufb2		Serpinb5	0	0	0	1	Serpinb5
				Nes	0	0	0	1	Nes		Serpinb9	0	0	0	1	Serpinb9
				Neurl4	0	0	0	1	Neurl4		Serping1	0	0	0	1	Serping1
				Nfatc1	0	0	0	1	Nfatc1		Sgk1	0	0	0	1	Sgk1
				Nfe2l1	0	0	0	1	Nfe2l1		Sh2d1b1	0	0	0	1	Sh2d1b1
				Nfkb1	0	0	0	1	Nfkb1		Shfl	0	0	0	1	Shfl
				Nfkb2	0	0	0	1	Nfkb2		Siglech	0	0	0	1	Siglech
				Nhsl2	0	0	0	1	Nhsl2		Sirpb1a	0	0	0	1	Sirpb1a
				Nisch	0	0	0	1	Nisch		Skap1	0	0	0	1	Skap1
				Nlgn2	0	0	0	1	Nlgn2		Slamf6	0	0	0	1	Slamf6
				Nol6	0	0	0	1	Nol6		Slc13a5	0	0	0	1	Slc13a5
				Nomo1	0	0	0	1	Nomo1		Slc15a2	0	0	0	1	Slc15a2
				Nos1ap	0	0	0	1	Nos1ap		Slc17a9	0	0	0	1	Slc17a9
				Notch1	0	0	0	1	Notch1		Slc22a18	0	0	0	1	Slc22a18
				Notch2	0	0	0	1	Notch2		Slc26a7	0	0	0	1	Slc26a7
				Notch3	0	0	0	1	Notch3		Slc35f3	0	0	0	1	Slc35f3
				Notch4	0	0	0	1	Notch4		Slc38a2	0	0	0	1	Slc38a2
				Nrgn	0	0	0	1	Nrgn		Slc38a9	0	0	0	1	Slc38a9
				Nrip2	0	0	0	1	Nrip2		Slc39a8	0	0	0	1	Slc39a8
				Nrn1	0	0	0	1	Nrn1		Slc3a2	0	0	0	1	Slc3a2
				Nsmf	0	0	0	1	Nsmf		Slc4a1	0	0	0	1	Slc4a1
				Nt5dc2	0	0	0	1	Nt5dc2		Slc4a4	0	0	0	1	Slc4a4
				Ntrk2	0	0	0	1	Ntrk2		Slc6a7	0	0	0	1	Slc6a7
				Nucb1	0	0	0	1	Nucb1		Slco3a1	0	0	0	1	Slco3a1
				Numb	0	0	0	1	Numb		Slpi	0	0	0	1	Slpi
				Nup214	0	0	0	1	Nup214		Sltm	0	0	0	1	Sltm
				Nynrin	0	0	0	1	Nynrin		Slx1b	0	0	0	1	Slx1b
				Oaz2	0	0	0	1	Oaz2		Smc4	0	0	0	1	Smc4
				Olfm1	0	0	0	1	Olfm1		Smim3	0	0	0	1	Smim3
				Olfr1033	0	0	0	1	Olfr1033		Smpdl3b	0	0	0	1	Smpdl3b
				Os9	0	0	0	1	Os9		Smpx	0	0	0	1	Smpx
				Osbp2	0	0	0	1	Osbp2		Smyd3	0	0	0	1	Smyd3
				Ostc	0	0	0	1	Ostc		Smyd4	0	0	0	1	Smyd4
				Oxct1	0	0	0	1	Oxct1		Snn	0	0	0	1	Snn
				P4hb	0	0	0	1	P4hb		Son	0	0	0	1	Son
				Pacs2	0	0	0	1	Pacs2		Spint1	0	0	0	1	Spint1
				Pald1	0	0	0	1	Pald1		Sptssb	0	0	0	1	Sptssb
				Palm	0	0	0	1	Palm		Srgn	0	0	0	1	Srgn
				Paqr4	0	0	0	1	Paqr4		St14	0	0	0	1	St14
				Parp3	0	0	0	1	Parp3		St6galnac5	0	0	0	1	St6galnac5
				Parva	0	0	0	1	Parva		Stag3	0	0	0	1	Stag3
				Parvb	0	0	0	1	Parvb		Stap1	0	0	0	1	Stap1
				Pcbp2	0	0	0	1	Pcbp2		Stard4	0	0	0	1	Stard4
				Pcdh12	0	0	0	1	Pcdh12		Stom	0	0	0	1	Stom
				Pde6g	0	0	0	1	Pde6g		Stx8	0	0	0	1	Stx8
				Pdgfb	0	0	0	1	Pdgfb		Stxbp5	0	0	0	1	Stxbp5
				Pdia3	0	0	0	1	Pdia3		Sult1a1	0	0	0	1	Sult1a1
				Pdia4	0	0	0	1	Pdia4		Sult5a1	0	0	0	1	Sult5a1
				Pdia6	0	0	0	1	Pdia6		Swap70	0	0	0	1	Swap70
				Pdk2	0	0	0	1	Pdk2		Tacc1	0	0	0	1	Tacc1
				Pdk4	0	0	0	1	Pdk4		Tacstd2	0	0	0	1	Tacstd2
				Pdlim5	0	0	0	1	Pdlim5		Tbx18	0	0	0	1	Tbx18
				Pdzd2	0	0	0	1	Pdzd2		Tfpi	0	0	0	1	Tfpi
				Pdzrn3	0	0	0	1	Pdzrn3		Thap3	0	0	0	1	Thap3
				Peli3	0	0	0	1	Peli3		Thnsl2	0	0	0	1	Thnsl2
				Pelp1	0	0	0	1	Pelp1		Thrsp	0	0	0	1	Thrsp
				Pex6	0	0	0	1	Pex6		Thsd7a	0	0	0	1	Thsd7a
				Pgam1	0	0	0	1	Pgam1		Tifa	0	0	0	1	Tifa
				Pgs1	0	0	0	1	Pgs1		Tipin	0	0	0	1	Tipin
				Phactr4	0	0	0	1	Phactr4		Tk2	0	0	0	1	Tk2
				Phc2	0	0	0	1	Phc2		Tlr1	0	0	0	1	Tlr1
				Phf2	0	0	0	1	Phf2		Tlr3	0	0	0	1	Tlr3
				Phldb1	0	0	0	1	Phldb1		Tm4sf1	0	0	0	1	Tm4sf1
				Phrf1	0	0	0	1	Phrf1		Tmem117	0	0	0	1	Tmem117
				Pi16	0	0	0	1	Pi16		Tmem131l	0	0	0	1	Tmem131l
				Pias3	0	0	0	1	Pias3		Tmem132c	0	0	0	1	Tmem132c
				Pigo	0	0	0	1	Pigo		Tmem44	0	0	0	1	Tmem44
				Pigs	0	0	0	1	Pigs		Tmem71	0	0	0	1	Tmem71
				Pik3r1	0	0	0	1	Pik3r1		Tmem92	0	0	0	1	Tmem92
				Pin1	0	0	0	1	Pin1		Tmpo	0	0	0	1	Tmpo
				Pip4k2b	0	0	0	1	Pip4k2b		Tmtc1	0	0	0	1	Tmtc1
				Pitpnm2	0	0	0	1	Pitpnm2		Tnfrsf13b	0	0	0	1	Tnfrsf13b
				Pkd1	0	0	0	1	Pkd1		Tpsab1	0	0	0	1	Tpsab1
				Pkd2	0	0	0	1	Pkd2		Trac	0	0	0	1	Trac
				Pkm	0	0	0	1	Pkm		Trat1	0	0	0	1	Trat1
				Pkn1	0	0	0	1	Pkn1		Trbc1	0	0	0	1	Trbc1
				Pkn3	0	0	0	1	Pkn3		Trem3	0	0	0	1	Trem3
				Plbd2	0	0	0	1	Plbd2		Treml2	0	0	0	1	Treml2
				Plec	0	0	0	1	Plec		Trgc2	0	0	0	1	Trgc2
				Plod1	0	0	0	1	Plod1		Trim12a	0	0	0	1	Trim12a
				Plod2	0	0	0	1	Plod2		Trim12c	0	0	0	1	Trim12c
				Plod3	0	0	0	1	Plod3		Trim25	0	0	0	1	Trim25
				Plpp1	0	0	0	1	Plpp1		Trim29	0	0	0	1	Trim29
				Pls3	0	0	0	1	Pls3		Trim63	0	0	0	1	Trim63
				Plxdc2	0	0	0	1	Plxdc2		Trim7	0	0	0	1	Trim7
				Plxna1	0	0	0	1	Plxna1		Trnau1ap	0	0	0	1	Trnau1ap
				Plxna2	0	0	0	1	Plxna2		Tro	0	0	0	1	Tro
				Plxnb2	0	0	0	1	Plxnb2		Tspan13	0	0	0	1	Tspan13
				Pmepa1	0	0	0	1	Pmepa1		Tspan32	0	0	0	1	Tspan32
				Podnl1	0	0	0	1	Podnl1		Tspo	0	0	0	1	Tspo
				Polr2a	0	0	0	1	Polr2a		Txnip	0	0	0	1	Txnip
				Polr2l	0	0	0	1	Polr2l		Tyrobp	0	0	0	1	Tyrobp
				Polr2m	0	0	0	1	Polr2m		Uba7	0	0	0	1	Uba7
				Pom121	0	0	0	1	Pom121		Ubash3a	0	0	0	1	Ubash3a
				Pomgnt2	0	0	0	1	Pomgnt2		Ube2l6	0	0	0	1	Ube2l6
				Pomt1	0	0	0	1	Pomt1		Ugcg	0	0	0	1	Ugcg
				Pomt2	0	0	0	1	Pomt2		Unc80	0	0	0	1	Unc80
				Por	0	0	0	1	Por		Upf3b	0	0	0	1	Upf3b
				Ppfia4	0	0	0	1	Ppfia4		Use1	0	0	0	1	Use1
				Ppp1r10	0	0	0	1	Ppp1r10		Uvssa	0	0	0	1	Uvssa
				Ppp1r16a	0	0	0	1	Ppp1r16a		Vnn1	0	0	0	1	Vnn1
				Ppp1r1b	0	0	0	1	Ppp1r1b		Vps11	0	0	0	1	Vps11
				Ppp1r37	0	0	0	1	Ppp1r37		Vps13a	0	0	0	1	Vps13a
				Ppp2r1a	0	0	0	1	Ppp2r1a		Vsx1	0	0	0	1	Vsx1
				Ppp4r1	0	0	0	1	Ppp4r1		Wdfy4	0	0	0	1	Wdfy4
				Ppp5c	0	0	0	1	Ppp5c		Wdr31	0	0	0	1	Wdr31
				Prdm2	0	0	0	1	Prdm2		Wfdc17	0	0	0	1	Wfdc17
				Prkcsh	0	0	0	1	Prkcsh		Wfdc21	0	0	0	1	Wfdc21
				Prph2	0	0	0	1	Prph2		Wnt10a	0	0	0	1	Wnt10a
				Prrt1	0	0	0	1	Prrt1		Wnt4	0	0	0	1	Wnt4
				Prss12	0	0	0	1	Prss12		X1500011B03Rik	0	0	0	1	X1500011B03Rik
				Prss23os	0	0	0	1	Prss23os		X1700047M11Rik	0	0	0	1	X1700047M11Rik
				Psap	0	0	0	1	Psap		X1810010H24Rik	0	0	0	1	X1810010H24Rik
				Ptgir	0	0	0	1	Ptgir		X2900005J15Rik	0	0	0	1	X2900005J15Rik
				Pthlh	0	0	0	1	Pthlh		X3110021N24Rik	0	0	0	1	X3110021N24Rik
				Ptma	0	0	0	1	Ptma		X4930438A08Rik	0	0	0	1	X4930438A08Rik
				Ptp4a3	0	0	0	1	Ptp4a3		X4930581F22Rik	0	0	0	1	X4930581F22Rik
				Ptpn23	0	0	0	1	Ptpn23		X4933429O19Rik	0	0	0	1	X4933429O19Rik
				Ptpn9	0	0	0	1	Ptpn9		X4933439C10Rik	0	0	0	1	X4933439C10Rik
				Ptprk	0	0	0	1	Ptprk		X5930430L01Rik	0	0	0	1	X5930430L01Rik
				Ptprm	0	0	0	1	Ptprm		X9930014A18Rik	0	0	0	1	X9930014A18Rik
				Ptpru	0	0	0	1	Ptpru		Xdh	0	0	0	1	Xdh
				Pum1	0	0	0	1	Pum1		Xist	0	0	0	1	Xist
				Qsox1	0	0	0	1	Qsox1		Xpa	0	0	0	1	Xpa
				Rab11fip3	0	0	0	1	Rab11fip3		Zan	0	0	0	1	Zan
				Rab1a	0	0	0	1	Rab1a		Zap70	0	0	0	1	Zap70
				Rai1	0	0	0	1	Rai1		Zc3h6	0	0	0	1	Zc3h6
				Rai2	0	0	0	1	Rai2		Zcchc18	0	0	0	1	Zcchc18
				Ralgds	0	0	0	1	Ralgds		Zdhhc20	0	0	0	1	Zdhhc20
				Raly	0	0	0	1	Raly		Zfas1	0	0	0	1	Zfas1
				Ramp3	0	0	0	1	Ramp3		Zfp943	0	0	0	1	Zfp943
				Rap1gds1	0	0	0	1	Rap1gds1		Zfp945	0	0	0	1	Zfp945
				Rapgef1	0	0	0	1	Rapgef1		Zfp950	0	0	0	1	Zfp950
				Rapgefl1	0	0	0	1	Rapgefl1		Zfp951	0	0	0	1	Zfp951
				Rbm10	0	0	0	1	Rbm10		Zfp956	0	0	0	1	Zfp956
				Rbm14	0	0	0	1	Rbm14		Zfp979	0	0	0	1	Zfp979
				Rbms2	0	0	0	1	Rbms2		Zfp981	0	0	0	1	Zfp981
				Reep2	0	0	0	1	Reep2		Zfp987	0	0	0	1	Zfp987
				Rela	0	0	0	1	Rela		Zik1	0	0	0	1	Zik1
				Rexo2	0	0	0	1	Rexo2		Zkscan2	0	0	0	1	Zkscan2
				Rflna	0	0	0	1	Rflna		Zmat1	0	0	0	1	Zmat1
				Rftn1	0	0	0	1	Rftn1		A530020G20Rik	0	1	0	1	A530020G20Rik
				Rfx1	0	0	0	1	Rfx1		A530030E21Rik	0	1	0	1	A530030E21Rik
				Rgma	0	0	0	1	Rgma		A530032D15Rik	0	1	0	1	A530032D15Rik
				Rgp1	0	0	0	1	Rgp1		A530040E14Rik	0	1	0	1	A530040E14Rik
				Rhoc	0	0	0	1	Rhoc		A630001G21Rik	0	1	0	1	A630001G21Rik
				Rhoj	0	0	0	1	Rhoj		Abcb1a	0	1	0	1	Abcb1a
				Ripor1	0	0	0	1	Ripor1		Abcb1b	0	1	0	1	Abcb1b
				Rnf126	0	0	0	1	Rnf126		Abcc4	0	1	0	1	Abcc4
				Rnf182	0	0	0	1	Rnf182		Abcg2	0	1	0	1	Abcg2
				Rnf19b	0	0	0	1	Rnf19b		AC147806.2	0	1	0	1	AC147806.2
				Rnf216	0	0	0	1	Rnf216		AC167036.1	0	1	0	1	AC167036.1
				Rnf44	0	0	0	1	Rnf44		Acap1	0	1	0	1	Acap1
				Rnft2	0	0	0	1	Rnft2		Acer2	0	1	0	1	Acer2
				Rnpep	0	0	0	1	Rnpep		Ache	0	1	0	1	Ache
				Rnpepl1	0	0	0	1	Rnpepl1		Ackr2	0	1	0	1	Ackr2
				Robo4	0	0	0	1	Robo4		Adam33	0	1	0	1	Adam33
				Rp1l1	0	0	0	1	Rp1l1		Adamtsl3	0	1	0	1	Adamtsl3
				Rpn1	0	0	0	1	Rpn1		Adcyap1r1	0	1	0	1	Adcyap1r1
				Rrbp1	0	0	0	1	Rrbp1		Adgrg5	0	1	0	1	Adgrg5
				Rtkn	0	0	0	1	Rtkn		Adgrv1	0	1	0	1	Adgrv1
				Rtl8a	0	0	0	1	Rtl8a		Adh1	0	1	0	1	Adh1
				Rtl8c	0	0	0	1	Rtl8c		Adssl1	0	1	0	1	Adssl1
				Rtn4rl1	0	0	0	1	Rtn4rl1		Afm	0	1	0	1	Afm
				Rubcn	0	0	0	1	Rubcn		Alcam	0	1	0	1	Alcam
				Ryk	0	0	0	1	Ryk		Aldh1a1	0	1	0	1	Aldh1a1
				S1pr1	0	0	0	1	S1pr1		Aldh6a1	0	1	0	1	Aldh6a1
				Sall1	0	0	0	1	Sall1		Aldoc	0	1	0	1	Aldoc
				Sall2	0	0	0	1	Sall2		Alox12	0	1	0	1	Alox12
				Samd11	0	0	0	1	Samd11		Ampd3	0	1	0	1	Ampd3
				Samd4	0	0	0	1	Samd4		Ankrd12	0	1	0	1	Ankrd12
				Sash1	0	0	0	1	Sash1		Anxa3	0	1	0	1	Anxa3
				Scaf1	0	0	0	1	Scaf1		Aox3	0	1	0	1	Aox3
				Scaf4	0	0	0	1	Scaf4		Apobec1	0	1	0	1	Apobec1
				Scap	0	0	0	1	Scap		Apobec3	0	1	0	1	Apobec3
				Scarb1	0	0	0	1	Scarb1		Apol9a	0	1	0	1	Apol9a
				Sdk2	0	0	0	1	Sdk2		Apol9b	0	1	0	1	Apol9b
				Sebox	0	0	0	1	Sebox		Aqp4	0	1	0	1	Aqp4
				Sec14l1	0	0	0	1	Sec14l1		Arhgap11a	0	1	0	1	Arhgap11a
				Sec14l2	0	0	0	1	Sec14l2		Arhgap30	0	1	0	1	Arhgap30
				Sec16b	0	0	0	1	Sec16b		Arhgap45	0	1	0	1	Arhgap45
				Sec61a1	0	0	0	1	Sec61a1		Arhgdib	0	1	0	1	Arhgdib
				Sema3g	0	0	0	1	Sema3g		Arhgef37	0	1	0	1	Arhgef37
				Sema4c	0	0	0	1	Sema4c		Asic2	0	1	0	1	Asic2
				Sema6a	0	0	0	1	Sema6a		Ass1	0	1	0	1	Ass1
				2022-09-05	0	0	0	1	Sep5		Atp1a2	0	1	0	1	Atp1a2
				2022-09-09	0	0	0	1	Sep9		AU020206	0	1	0	1	AU020206
				Sf3a1	0	0	0	1	Sf3a1		AW112010	0	1	0	1	AW112010
				Sf3b4	0	0	0	1	Sf3b4		B2m	0	1	0	1	B2m
				Sfpq	0	0	0	1	Sfpq		Baz1a	0	1	0	1	Baz1a
				Sfrp4	0	0	0	1	Sfrp4		BC051142	0	1	0	1	BC051142
				Sgms2	0	0	0	1	Sgms2		Bcan	0	1	0	1	Bcan
				Sgta	0	0	0	1	Sgta		Bcap29	0	1	0	1	Bcap29
				Sh3bgrl2	0	0	0	1	Sh3bgrl2		Bche	0	1	0	1	Bche
				Sh3gl1	0	0	0	1	Sh3gl1		Bcl2	0	1	0	1	Bcl2
				Sh3pxd2b	0	0	0	1	Sh3pxd2b		Begain	0	1	0	1	Begain
				Sh3rf1	0	0	0	1	Sh3rf1		Bend6	0	1	0	1	Bend6
				Shank3	0	0	0	1	Shank3		Bmp4	0	1	0	1	Bmp4
				Shisal1	0	0	0	1	Shisal1		Bmp6	0	1	0	1	Bmp6
				Sik3	0	0	0	1	Sik3		Bst2	0	1	0	1	Bst2
				Sim2	0	0	0	1	Sim2		C130026I21Rik	0	1	0	1	C130026I21Rik
				Sipa1	0	0	0	1	Sipa1		C1qa	0	1	0	1	C1qa
				Sipa1l2	0	0	0	1	Sipa1l2		C1qb	0	1	0	1	C1qb
				Sirt2	0	0	0	1	Sirt2		C1ra	0	1	0	1	C1ra
				Slc16a9	0	0	0	1	Slc16a9		C3	0	1	0	1	C3
				Slc25a23	0	0	0	1	Slc25a23		C4b	0	1	0	1	C4b
				Slc25a5	0	0	0	1	Slc25a5		C6	0	1	0	1	C6
				Slc29a1	0	0	0	1	Slc29a1		Cacna1a	0	1	0	1	Cacna1a
				Slc35e1	0	0	0	1	Slc35e1		Cacna1b	0	1	0	1	Cacna1b
				Slc36a1	0	0	0	1	Slc36a1		Cacnb2	0	1	0	1	Cacnb2
				Slc37a2	0	0	0	1	Slc37a2		Cadps	0	1	0	1	Cadps
				Slc38a3	0	0	0	1	Slc38a3		Cap2	0	1	0	1	Cap2
				Slc39a13	0	0	0	1	Slc39a13		Car4	0	1	0	1	Car4
				Slc39a14	0	0	0	1	Slc39a14		Cartpt	0	1	0	1	Cartpt
				Slc45a4	0	0	0	1	Slc45a4		Casp4	0	1	0	1	Casp4
				Slc46a1	0	0	0	1	Slc46a1		Cbln1	0	1	0	1	Cbln1
				Slc52a3	0	0	0	1	Slc52a3		Cbx7	0	1	0	1	Cbx7
				Slc9a3r2	0	0	0	1	Slc9a3r2		Ccbe1	0	1	0	1	Ccbe1
				Smad3	0	0	0	1	Smad3		Ccl5	0	1	0	1	Ccl5
				Smarca4	0	0	0	1	Smarca4		Ccl7	0	1	0	1	Ccl7
				Smarcb1	0	0	0	1	Smarcb1		Ccl8	0	1	0	1	Ccl8
				Smarcc2	0	0	0	1	Smarcc2		Ccn3	0	1	0	1	Ccn3
				Smg5	0	0	0	1	Smg5		Cd14	0	1	0	1	Cd14
				Smoc2	0	0	0	1	Smoc2		Cd163l1	0	1	0	1	Cd163l1
				Smpd1	0	0	0	1	Smpd1		Cd2	0	1	0	1	Cd2
				Smpd3	0	0	0	1	Smpd3		Cd22	0	1	0	1	Cd22
				Smpdl3a	0	0	0	1	Smpdl3a		Cd274	0	1	0	1	Cd274
				Snap91	0	0	0	1	Snap91		Cd300lf	0	1	0	1	Cd300lf
				Snd1	0	0	0	1	Snd1		Cd33	0	1	0	1	Cd33
				Snph	0	0	0	1	Snph		Cd37	0	1	0	1	Cd37
				Snx9	0	0	0	1	Snx9		Cd3e	0	1	0	1	Cd3e
				Socs5	0	0	0	1	Socs5		Cd3g	0	1	0	1	Cd3g
				Sorbs3	0	0	0	1	Sorbs3		Cd5	0	1	0	1	Cd5
				Sorl1	0	0	0	1	Sorl1		Cd52	0	1	0	1	Cd52
				Sostdc1	0	0	0	1	Sostdc1		Cd53	0	1	0	1	Cd53
				Sox11	0	0	0	1	Sox11		Cd6	0	1	0	1	Cd6
				Sox13	0	0	0	1	Sox13		Cd72	0	1	0	1	Cd72
				Sox18	0	0	0	1	Sox18		Cd79a	0	1	0	1	Cd79a
				Sox4	0	0	0	1	Sox4		Cd84	0	1	0	1	Cd84
				Sp2	0	0	0	1	Sp2		Cd8a	0	1	0	1	Cd8a
				Spata13	0	0	0	1	Spata13		Cd8b1	0	1	0	1	Cd8b1
				Spata18	0	0	0	1	Spata18		Cdh8	0	1	0	1	Cdh8
				Spef1	0	0	0	1	Spef1		Cdkn2c	0	1	0	1	Cdkn2c
				Spen	0	0	0	1	Spen		Cga	0	1	0	1	Cga
				Spg20	0	0	0	1	Spg20		Chd5	0	1	0	1	Chd5
				Sphk2	0	0	0	1	Sphk2		Chd7	0	1	0	1	Chd7
				Spock2	0	0	0	1	Spock2		Ciart	0	1	0	1	Ciart
				Sppl2b	0	0	0	1	Sppl2b		Cirbp	0	1	0	1	Cirbp
				Sppl3	0	0	0	1	Sppl3		Clca3a1	0	1	0	1	Clca3a1
				Spred2	0	0	0	1	Spred2		Cldn5	0	1	0	1	Cldn5
				Spsb4	0	0	0	1	Spsb4		Clec4d	0	1	0	1	Clec4d
				Sptb	0	0	0	1	Sptb		Cmpk2	0	1	0	1	Cmpk2
				Src	0	0	0	1	Src		Cntn4	0	1	0	1	Cntn4
				Srebf2	0	0	0	1	Srebf2		Col13a1	0	1	0	1	Col13a1
				Srpr	0	0	0	1	Srpr		Col23a1	0	1	0	1	Col23a1
				Srpx2	0	0	0	1	Srpx2		Col25a1	0	1	0	1	Col25a1
				Srrm3	0	0	0	1	Srrm3		Col9a2	0	1	0	1	Col9a2
				Ss18	0	0	0	1	Ss18		Coro1a	0	1	0	1	Coro1a
				Ssr2	0	0	0	1	Ssr2		Coro2a	0	1	0	1	Coro2a
				St3gal1	0	0	0	1	St3gal1		Cp	0	1	0	1	Cp
				St3gal3	0	0	0	1	St3gal3		Cpeb1	0	1	0	1	Cpeb1
				St5	0	0	0	1	St5		Cpne7	0	1	0	1	Cpne7
				St8sia2	0	0	0	1	St8sia2		Cpne9	0	1	0	1	Cpne9
				Stac	0	0	0	1	Stac		Creg2	0	1	0	1	Creg2
				Stip1	0	0	0	1	Stip1		Crlf2	0	1	0	1	Crlf2
				Stk25	0	0	0	1	Stk25		Crybg1	0	1	0	1	Crybg1
				Ston1	0	0	0	1	Ston1		Ctps	0	1	0	1	Ctps
				Stra6	0	0	0	1	Stra6		Ctsg	0	1	0	1	Ctsg
				Strn4	0	0	0	1	Strn4		Ctss	0	1	0	1	Ctss
				Stub1	0	0	0	1	Stub1		Ctxn3	0	1	0	1	Ctxn3
				Stxbp4	0	0	0	1	Stxbp4		Cxadr	0	1	0	1	Cxadr
				Sufu	0	0	0	1	Sufu		Cxcl12	0	1	0	1	Cxcl12
				Sympk	0	0	0	1	Sympk		Cxcl13	0	1	0	1	Cxcl13
				Synj2	0	0	0	1	Synj2		Cxcr4	0	1	0	1	Cxcr4
				Synpo	0	0	0	1	Synpo		Cyb5r3	0	1	0	1	Cyb5r3
				Syt9	0	0	0	1	Syt9		Cybb	0	1	0	1	Cybb
				Syvn1	0	0	0	1	Syvn1		Cyfip2	0	1	0	1	Cyfip2
				Tafa3	0	0	0	1	Tafa3		Cyp27a1	0	1	0	1	Cyp27a1
				Tagln2	0	0	0	1	Tagln2		Cyp4a12b	0	1	0	1	Cyp4a12b
				Taok2	0	0	0	1	Taok2		Cyp4f18	0	1	0	1	Cyp4f18
				Tbc1d10b	0	0	0	1	Tbc1d10b		Cyp4v3	0	1	0	1	Cyp4v3
				Tbc1d13	0	0	0	1	Tbc1d13		Cytip	0	1	0	1	Cytip
				Tbc1d9b	0	0	0	1	Tbc1d9b		Cytl1	0	1	0	1	Cytl1
				Tbcel	0	0	0	1	Tbcel		D430041D05Rik	0	1	0	1	D430041D05Rik
				Tcf7l1	0	0	0	1	Tcf7l1		Dcdc2a	0	1	0	1	Dcdc2a
				Tgm2	0	0	0	1	Tgm2		Derl3	0	1	0	1	Derl3
				Thbd	0	0	0	1	Thbd		Dgat2	0	1	0	1	Dgat2
				Tie1	0	0	0	1	Tie1		Dgkd	0	1	0	1	Dgkd
				Timp2	0	0	0	1	Timp2		Dhx58	0	1	0	1	Dhx58
				Tjap1	0	0	0	1	Tjap1		Dixdc1	0	1	0	1	Dixdc1
				Tle2	0	0	0	1	Tle2		Doc2a	0	1	0	1	Doc2a
				Tlnrd1	0	0	0	1	Tlnrd1		Dock2	0	1	0	1	Dock2
				Tmcc2	0	0	0	1	Tmcc2		Dock3	0	1	0	1	Dock3
				Tmem100	0	0	0	1	Tmem100		Dpp4	0	1	0	1	Dpp4
				Tmem104	0	0	0	1	Tmem104		Dpp6	0	1	0	1	Dpp6
				Tmem131	0	0	0	1	Tmem131		Dpysl5	0	1	0	1	Dpysl5
				Tmem184b	0	0	0	1	Tmem184b		Elane	0	1	0	1	Elane
				Tmem201	0	0	0	1	Tmem201		Enox1	0	1	0	1	Enox1
				Tmem229b	0	0	0	1	Tmem229b		Epha5	0	1	0	1	Epha5
				Tmem231	0	0	0	1	Tmem231		Ephx1	0	1	0	1	Ephx1
				Tmem63b	0	0	0	1	Tmem63b		Etnppl	0	1	0	1	Etnppl
				Tmem94	0	0	0	1	Tmem94		Fabp7	0	1	0	1	Fabp7
				Tmsb10	0	0	0	1	Tmsb10		Fam163b	0	1	0	1	Fam163b
				Tnfaip6	0	0	0	1	Tnfaip6		Fam169b	0	1	0	1	Fam169b
				Tnfrsf12a	0	0	0	1	Tnfrsf12a		Fbxo2	0	1	0	1	Fbxo2
				Tnfrsf1a	0	0	0	1	Tnfrsf1a		Fcer1a	0	1	0	1	Fcer1a
				Tnip1	0	0	0	1	Tnip1		Fcer1g	0	1	0	1	Fcer1g
				Tnks1bp1	0	0	0	1	Tnks1bp1		Fcgr1	0	1	0	1	Fcgr1
				Tns1	0	0	0	1	Tns1		Fcgr2b	0	1	0	1	Fcgr2b
				Tns2	0	0	0	1	Tns2		Fcgr4	0	1	0	1	Fcgr4
				Tns3	0	0	0	1	Tns3		Fcmr	0	1	0	1	Fcmr
				Tob1	0	0	0	1	Tob1		Fcrl5	0	1	0	1	Fcrl5
				Tom1l1	0	0	0	1	Tom1l1		Fcrla	0	1	0	1	Fcrla
				Traf3ip1	0	0	0	1	Traf3ip1		Fendrr	0	1	0	1	Fendrr
				Trak1	0	0	0	1	Trak1		Fgf12	0	1	0	1	Fgf12
				Trak2	0	0	0	1	Trak2		Fgf7	0	1	0	1	Fgf7
				Tram2	0	0	0	1	Tram2		Fgfbp1	0	1	0	1	Fgfbp1
				Trim32	0	0	0	1	Trim32		Fgfbp3	0	1	0	1	Fgfbp3
				Trim8	0	0	0	1	Trim8		Foxf1	0	1	0	1	Foxf1
				Trpm4	0	0	0	1	Trpm4		Gabrd	0	1	0	1	Gabrd
				Tsc2	0	0	0	1	Tsc2		Garnl3	0	1	0	1	Garnl3
				Tsc22d1	0	0	0	1	Tsc22d1		Gbp3	0	1	0	1	Gbp3
				Tsc22d3	0	0	0	1	Tsc22d3		Gbp5	0	1	0	1	Gbp5
				Tsc22d4	0	0	0	1	Tsc22d4		Gbp8	0	1	0	1	Gbp8
				Tspan31	0	0	0	1	Tspan31		Gdf3	0	1	0	1	Gdf3
				Ttll12	0	0	0	1	Ttll12		Gdpd2	0	1	0	1	Gdpd2
				Ttr	0	0	0	1	Ttr		Ggact	0	1	0	1	Ggact
				Tuba1a	0	0	0	1	Tuba1a		Gimap3	0	1	0	1	Gimap3
				Tuba1c	0	0	0	1	Tuba1c		Gldn	0	1	0	1	Gldn
				Tubb4a	0	0	0	1	Tubb4a		Gm10499	0	1	0	1	Gm10499
				Tubb4b	0	0	0	1	Tubb4b		Gm14964	0	1	0	1	Gm14964
				Tubb5	0	0	0	1	Tubb5		Gm16028	0	1	0	1	Gm16028
				Tubb6	0	0	0	1	Tubb6		Gm16505	0	1	0	1	Gm16505
				Txlna	0	0	0	1	Txlna		Gm17019	0	1	0	1	Gm17019
				U2af2	0	0	0	1	U2af2		Gm18342	0	1	0	1	Gm18342
				Uba1	0	0	0	1	Uba1		Gm20486	0	1	0	1	Gm20486
				Uba5	0	0	0	1	Uba5		Gm31520	0	1	0	1	Gm31520
				Ubald1	0	0	0	1	Ubald1		Gm40849	0	1	0	1	Gm40849
				Ubap2l	0	0	0	1	Ubap2l		Gm42047	0	1	0	1	Gm42047
				Ubc	0	0	0	1	Ubc		Gm43534	0	1	0	1	Gm43534
				Ube2z	0	0	0	1	Ube2z		Gm47393	0	1	0	1	Gm47393
				Ube3b	0	0	0	1	Ube3b		Gm4951	0	1	0	1	Gm4951
				Ubfd1	0	0	0	1	Ubfd1		Gm49769	0	1	0	1	Gm49769
				Ubiad1	0	0	0	1	Ubiad1		Gm5127	0	1	0	1	Gm5127
				Ubqln4	0	0	0	1	Ubqln4		Gm8995	0	1	0	1	Gm8995
				Ubr4	0	0	0	1	Ubr4		Gm9758	0	1	0	1	Gm9758
				Uck1	0	0	0	1	Uck1		Gp5	0	1	0	1	Gp5
				Uggt1	0	0	0	1	Uggt1		Gpnmb	0	1	0	1	Gpnmb
				Ulk1	0	0	0	1	Ulk1		Gpr158	0	1	0	1	Gpr158
				Unc119b	0	0	0	1	Unc119b		Gpr55	0	1	0	1	Gpr55
				Unc45a	0	0	0	1	Unc45a		Gpr68	0	1	0	1	Gpr68
				Uqcrc1	0	0	0	1	Uqcrc1		Grap2	0	1	0	1	Grap2
				Uso1	0	0	0	1	Uso1		Grem1	0	1	0	1	Grem1
				Usp10	0	0	0	1	Usp10		Gria4	0	1	0	1	Gria4
				Usp19	0	0	0	1	Usp19		Grik3	0	1	0	1	Grik3
				Usp33	0	0	0	1	Usp33		Grin1	0	1	0	1	Grin1
				Usp9x	0	0	0	1	Usp9x		Gsta3	0	1	0	1	Gsta3
				Vapb	0	0	0	1	Vapb		Gzmk	0	1	0	1	Gzmk
				Vash1	0	0	0	1	Vash1		H2.Ab1	0	1	0	1	H2.Ab1
				Vgll4	0	0	0	1	Vgll4		H2.D1	0	1	0	1	H2.D1
				Vps18	0	0	0	1	Vps18		H2.DMb2	0	1	0	1	H2.DMb2
				Vps9d1	0	0	0	1	Vps9d1		H2.Eb1	0	1	0	1	H2.Eb1
				Wasf2	0	0	0	1	Wasf2		H2.Eb2	0	1	0	1	H2.Eb2
				Wasf3	0	0	0	1	Wasf3		H2.K1	0	1	0	1	H2.K1
				Wbp1	0	0	0	1	Wbp1		H2.K2	0	1	0	1	H2.K2
				Wbp11	0	0	0	1	Wbp11		H2.M3	0	1	0	1	H2.M3
				Wbp1l	0	0	0	1	Wbp1l		H2.Q1	0	1	0	1	H2.Q1
				Wdr6	0	0	0	1	Wdr6		H2.Q4	0	1	0	1	H2.Q4
				Wdr86	0	0	0	1	Wdr86		H2.Q5	0	1	0	1	H2.Q5
				Wfs1	0	0	0	1	Wfs1		H2.Q6	0	1	0	1	H2.Q6
				Wipf1	0	0	0	1	Wipf1		H2.Q7	0	1	0	1	H2.Q7
				Wipf2	0	0	0	1	Wipf2		H2.T.ps	0	1	0	1	H2.T.ps
				Wnk2	0	0	0	1	Wnk2		H2.T10	0	1	0	1	H2.T10
				Wnt10b	0	0	0	1	Wnt10b		H2.T22	0	1	0	1	H2.T22
				Wnt5b	0	0	0	1	Wnt5b		H2.T23	0	1	0	1	H2.T23
				Wnt9a	0	0	0	1	Wnt9a		Havcr2	0	1	0	1	Havcr2
				X1700007K13Rik	0	0	0	1	X1700007K13Rik		Hdhd3	0	1	0	1	Hdhd3
				X1700013F07Rik	0	0	0	1	X1700013F07Rik		Hhip	0	1	0	1	Hhip
				X2510009E07Rik	0	0	0	1	X2510009E07Rik		Hmgb2	0	1	0	1	Hmgb2
				X2900026A02Rik	0	0	0	1	X2900026A02Rik		Hp	0	1	0	1	Hp
				Xirp1	0	0	0	1	Xirp1		Hpcal4	0	1	0	1	Hpcal4
				Xpnpep1	0	0	0	1	Xpnpep1		Hpse	0	1	0	1	Hpse
				Xylt1	0	0	0	1	Xylt1		Hs3st3a1	0	1	0	1	Hs3st3a1
				Yap1	0	0	0	1	Yap1		Ide	0	1	0	1	Ide
				Ybx1	0	0	0	1	Ybx1		Ier3	0	1	0	1	Ier3
				Ybx3	0	0	0	1	Ybx3		Ifi203	0	1	0	1	Ifi203
				Yipf3	0	0	0	1	Yipf3		Ifi204	0	1	0	1	Ifi204
				Yjefn3	0	0	0	1	Yjefn3		Ifi207	0	1	0	1	Ifi207
				Ywhab	0	0	0	1	Ywhab		Ifi211	0	1	0	1	Ifi211
				Ywhag	0	0	0	1	Ywhag		Ifi213	0	1	0	1	Ifi213
				Ywhah	0	0	0	1	Ywhah		Ifi27l2a	0	1	0	1	Ifi27l2a
				Zbtb40	0	0	0	1	Zbtb40		Ifi44	0	1	0	1	Ifi44
				Zbtb7a	0	0	0	1	Zbtb7a		Ifih1	0	1	0	1	Ifih1
				Zbtb7b	0	0	0	1	Zbtb7b		Ifit1	0	1	0	1	Ifit1
				Zc3h18	0	0	0	1	Zc3h18		Ifit2	0	1	0	1	Ifit2
				Zc3h3	0	0	0	1	Zc3h3		Ifit3	0	1	0	1	Ifit3
				Zc3h4	0	0	0	1	Zc3h4		Ifit3b	0	1	0	1	Ifit3b
				Zc3h7b	0	0	0	1	Zc3h7b		Ifitm1	0	1	0	1	Ifitm1
				Zcchc14	0	0	0	1	Zcchc14		Ifitm3	0	1	0	1	Ifitm3
				Zcchc24	0	0	0	1	Zcchc24		Ifitm6	0	1	0	1	Ifitm6
				Zdhhc5	0	0	0	1	Zdhhc5		Igha	0	1	0	1	Igha
				Zdhhc8	0	0	0	1	Zdhhc8		Ighd	0	1	0	1	Ighd
				Zdhhc9	0	0	0	1	Zdhhc9		Ighg1	0	1	0	1	Ighg1
				Zfand3	0	0	0	1	Zfand3		Ighg2b	0	1	0	1	Ighg2b
				Zfp219	0	0	0	1	Zfp219		Ighg3	0	1	0	1	Ighg3
				Zfp335	0	0	0	1	Zfp335		Ighm	0	1	0	1	Ighm
				Zfp423	0	0	0	1	Zfp423		Ighv1.19	0	1	0	1	Ighv1.19
				Zfp469	0	0	0	1	Zfp469		Ighv1.39	0	1	0	1	Ighv1.39
				Zfp574	0	0	0	1	Zfp574		Ighv1.5	0	1	0	1	Ighv1.5
				Zfp608	0	0	0	1	Zfp608		Ighv1.53	0	1	0	1	Ighv1.53
				Zfp628	0	0	0	1	Zfp628		Ighv1.55	0	1	0	1	Ighv1.55
				Zfpm1	0	0	0	1	Zfpm1		Ighv1.63	0	1	0	1	Ighv1.63
				Zgpat	0	0	0	1	Zgpat		Ighv1.64	0	1	0	1	Ighv1.64
				Zhx2	0	0	0	1	Zhx2		Ighv1.7	0	1	0	1	Ighv1.7
				Zhx3	0	0	0	1	Zhx3		Ighv1.72	0	1	0	1	Ighv1.72
				Zmiz1	0	0	0	1	Zmiz1		Ighv1.81	0	1	0	1	Ighv1.81
				Zmiz2	0	0	0	1	Zmiz2		Ighv1.82	0	1	0	1	Ighv1.82
				Zmynd8	0	0	0	1	Zmynd8		Ighv1.9	0	1	0	1	Ighv1.9
				Zswim8	0	0	0	1	Zswim8		Ighv14.2	0	1	0	1	Ighv14.2
				Abcc9	0	1	0	1	Abcc9		Ighv14.4	0	1	0	1	Ighv14.4
				Abi3bp	0	1	0	1	Abi3bp		Ighv2.3	0	1	0	1	Ighv2.3
				Acan	0	1	0	1	Acan		Ighv3.6	0	1	0	1	Ighv3.6
				Acly	0	1	0	1	Acly		Ighv4.1	0	1	0	1	Ighv4.1
				Acta2	0	1	0	1	Acta2		Ighv5.17	0	1	0	1	Ighv5.17
				Actb	0	1	0	1	Actb		Ighv9.1	0	1	0	1	Ighv9.1
				Actg1	0	1	0	1	Actg1		Ighv9.3	0	1	0	1	Ighv9.3
				Adam11	0	1	0	1	Adam11		Igkc	0	1	0	1	Igkc
				Adam19	0	1	0	1	Adam19		Igkv1.117	0	1	0	1	Igkv1.117
				Adamts10	0	1	0	1	Adamts10		Igkv1.135	0	1	0	1	Igkv1.135
				Adamts17	0	1	0	1	Adamts17		Igkv1.88	0	1	0	1	Igkv1.88
				Adamts2	0	1	0	1	Adamts2		Igkv10.94	0	1	0	1	Igkv10.94
				Adamts3	0	1	0	1	Adamts3		Igkv10.96	0	1	0	1	Igkv10.96
				Adamts4	0	1	0	1	Adamts4		Igkv12.44	0	1	0	1	Igkv12.44
				Adamts9	0	1	0	1	Adamts9		Igkv12.98	0	1	0	1	Igkv12.98
				Adgra2	0	1	0	1	Adgra2		Igkv13.85	0	1	0	1	Igkv13.85
				Adgra3	0	1	0	1	Adgra3		Igkv14.111	0	1	0	1	Igkv14.111
				Adra1b	0	1	0	1	Adra1b		Igkv15.103	0	1	0	1	Igkv15.103
				Adra2c	0	1	0	1	Adra2c		Igkv16.104	0	1	0	1	Igkv16.104
				Agpat1	0	1	0	1	Agpat1		Igkv2.109	0	1	0	1	Igkv2.109
				Agtr1a	0	1	0	1	Agtr1a		Igkv3.10	0	1	0	1	Igkv3.10
				Ahdc1	0	1	0	1	Ahdc1		Igkv3.12	0	1	0	1	Igkv3.12
				Aipl1	0	1	0	1	Aipl1		Igkv3.2	0	1	0	1	Igkv3.2
				Akt2	0	1	0	1	Akt2		Igkv3.5	0	1	0	1	Igkv3.5
				Aldh18a1	0	1	0	1	Aldh18a1		Igkv4.55	0	1	0	1	Igkv4.55
				Alpl	0	1	0	1	Alpl		Igkv4.57.1	0	1	0	1	Igkv4.57.1
				Alx1	0	1	0	1	Alx1		Igkv4.74	0	1	0	1	Igkv4.74
				Ampd2	0	1	0	1	Ampd2		Igkv4.80	0	1	0	1	Igkv4.80
				Angpt2	0	1	0	1	Angpt2		Igkv4.91	0	1	0	1	Igkv4.91
				Angpt4	0	1	0	1	Angpt4		Igkv5.39	0	1	0	1	Igkv5.39
				Ankrd33	0	1	0	1	Ankrd33		Igkv5.48	0	1	0	1	Igkv5.48
				Ankrd35	0	1	0	1	Ankrd35		Igkv6.15	0	1	0	1	Igkv6.15
				Ano8	0	1	0	1	Ano8		Igkv6.17	0	1	0	1	Igkv6.17
				Antxr1	0	1	0	1	Antxr1		Igkv6.32	0	1	0	1	Igkv6.32
				Aoc3	0	1	0	1	Aoc3		Igkv8.21	0	1	0	1	Igkv8.21
				Aplnr	0	1	0	1	Aplnr		Igkv8.27	0	1	0	1	Igkv8.27
				Aqp1	0	1	0	1	Aqp1		Igkv9.120	0	1	0	1	Igkv9.120
				Arhgap28	0	1	0	1	Arhgap28		Igkv9.124	0	1	0	1	Igkv9.124
				Arhgef17	0	1	0	1	Arhgef17		Iglc1	0	1	0	1	Iglc1
				Arhgef19	0	1	0	1	Arhgef19		Iglc2	0	1	0	1	Iglc2
				Arhgef40	0	1	0	1	Arhgef40		Iglv1	0	1	0	1	Iglv1
				Arid1a	0	1	0	1	Arid1a		Igsf6	0	1	0	1	Igsf6
				Armcx2	0	1	0	1	Armcx2		Ikzf1	0	1	0	1	Ikzf1
				Armcx4	0	1	0	1	Armcx4		Ikzf3	0	1	0	1	Ikzf3
				Asmt	0	1	0	1	Asmt		Il17ra	0	1	0	1	Il17ra
				Atf5	0	1	0	1	Atf5		Il18r1	0	1	0	1	Il18r1
				Atp1a3	0	1	0	1	Atp1a3		Il18rap	0	1	0	1	Il18rap
				Atp1b2	0	1	0	1	Atp1b2		Il2rg	0	1	0	1	Il2rg
				Atp8b2	0	1	0	1	Atp8b2		Il7r	0	1	0	1	Il7r
				Atxn7l3	0	1	0	1	Atxn7l3		Ildr2	0	1	0	1	Ildr2
				Auts2	0	1	0	1	Auts2		Impg2	0	1	0	1	Impg2
				B3gat1	0	1	0	1	B3gat1		Iqgap2	0	1	0	1	Iqgap2
				B3gat3	0	1	0	1	B3gat3		Irak3	0	1	0	1	Irak3
				B3gnt9	0	1	0	1	B3gnt9		Irf4	0	1	0	1	Irf4
				B4galnt3	0	1	0	1	B4galnt3		Irf8	0	1	0	1	Irf8
				B4galt2	0	1	0	1	B4galt2		Isg15	0	1	0	1	Isg15
				Bace1	0	1	0	1	Bace1		Itga2b	0	1	0	1	Itga2b
				Basp1	0	1	0	1	Basp1		Itgal	0	1	0	1	Itgal
				Bcar1	0	1	0	1	Bcar1		Itgam	0	1	0	1	Itgam
				Bcl9l	0	1	0	1	Bcl9l		Itgax	0	1	0	1	Itgax
				Bglap2	0	1	0	1	Bglap2		Itgb2	0	1	0	1	Itgb2
				Bicc1	0	1	0	1	Bicc1		Itgb7	0	1	0	1	Itgb7
				Boc	0	1	0	1	Boc		Itpr3	0	1	0	1	Itpr3
				Brip1os	0	1	0	1	Brip1os		Jakmip3	0	1	0	1	Jakmip3
				Bzw1	0	1	0	1	Bzw1		Jchain	0	1	0	1	Jchain
				C130021I20Rik	0	1	0	1	C130021I20Rik		Kcnt1	0	1	0	1	Kcnt1
				C1qtnf1	0	1	0	1	C1qtnf1		Klf5	0	1	0	1	Klf5
				C1qtnf2	0	1	0	1	C1qtnf2		L1td1	0	1	0	1	L1td1
				C1qtnf6	0	1	0	1	C1qtnf6		Lair1	0	1	0	1	Lair1
				C2cd2l	0	1	0	1	C2cd2l		Lama1	0	1	0	1	Lama1
				C430049B03Rik	0	1	0	1	C430049B03Rik		Lax1	0	1	0	1	Lax1
				Cacna1f	0	1	0	1	Cacna1f		Lck	0	1	0	1	Lck
				Cacna1g	0	1	0	1	Cacna1g		Lcp1	0	1	0	1	Lcp1
				Cad	0	1	0	1	Cad		Lcp2	0	1	0	1	Lcp2
				Calm3	0	1	0	1	Calm3		Lhfpl5	0	1	0	1	Lhfpl5
				Calr	0	1	0	1	Calr		Lilr4b	0	1	0	1	Lilr4b
				Calu	0	1	0	1	Calu		Lpxn	0	1	0	1	Lpxn
				Capn6	0	1	0	1	Capn6		Lrat	0	1	0	1	Lrat
				Cat	0	1	0	1	Cat		Lrp8	0	1	0	1	Lrp8
				Cavin3	0	1	0	1	Cavin3		Lrrc8b	0	1	0	1	Lrrc8b
				Cbx6	0	1	0	1	Cbx6		Ltb	0	1	0	1	Ltb
				Ccdc3	0	1	0	1	Ccdc3		Luzp2	0	1	0	1	Luzp2
				Ccdc8	0	1	0	1	Ccdc8		Ly6a	0	1	0	1	Ly6a
				Ccdc80	0	1	0	1	Ccdc80		Ly6c2	0	1	0	1	Ly6c2
				Ccdc97	0	1	0	1	Ccdc97		Ly6d	0	1	0	1	Ly6d
				Ccnd2	0	1	0	1	Ccnd2		Ly75	0	1	0	1	Ly75
				Cd276	0	1	0	1	Cd276		Ly9	0	1	0	1	Ly9
				Cdc42bpg	0	1	0	1	Cdc42bpg		Mal	0	1	0	1	Mal
				Cdc42ep1	0	1	0	1	Cdc42ep1		Map3k8	0	1	0	1	Map3k8
				Cdk14	0	1	0	1	Cdk14		Map6	0	1	0	1	Map6
				Cdk5r2	0	1	0	1	Cdk5r2		Mapk12	0	1	0	1	Mapk12
				Cep170b	0	1	0	1	Cep170b		Meg3	0	1	0	1	Meg3
				Cercam	0	1	0	1	Cercam		Mfap5	0	1	0	1	Mfap5
				Chad	0	1	0	1	Chad		Mfsd2b	0	1	0	1	Mfsd2b
				Chd3	0	1	0	1	Chd3		Mgarp	0	1	0	1	Mgarp
				Chdh	0	1	0	1	Chdh		Mgst1	0	1	0	1	Mgst1
				Chrdl2	0	1	0	1	Chrdl2		Mir142hg	0	1	0	1	Mir142hg
				Chst12	0	1	0	1	Chst12		Mlc1	0	1	0	1	Mlc1
				Chst2	0	1	0	1	Chst2		Mmp12	0	1	0	1	Mmp12
				Cic	0	1	0	1	Cic		Mndal	0	1	0	1	Mndal
				Cilp2	0	1	0	1	Cilp2		Mpeg1	0	1	0	1	Mpeg1
				Ckap4	0	1	0	1	Ckap4		Mpo	0	1	0	1	Mpo
				Ckmt1	0	1	0	1	Ckmt1		Mpped1	0	1	0	1	Mpped1
				Clec11a	0	1	0	1	Clec11a		Mro	0	1	0	1	Mro
				Clec3b	0	1	0	1	Clec3b		Ms4a3	0	1	0	1	Ms4a3
				Clip2	0	1	0	1	Clip2		Ms4a4b	0	1	0	1	Ms4a4b
				Clip3	0	1	0	1	Clip3		Ms4a4d	0	1	0	1	Ms4a4d
				Clmp	0	1	0	1	Clmp		Ms4a6b	0	1	0	1	Ms4a6b
				Clstn1	0	1	0	1	Clstn1		Ms4a6d	0	1	0	1	Ms4a6d
				Cmtr2	0	1	0	1	Cmtr2		Msln	0	1	0	1	Msln
				Cnga3	0	1	0	1	Cnga3		Mthfd1l	0	1	0	1	Mthfd1l
				Cngb1	0	1	0	1	Cngb1		Mx1	0	1	0	1	Mx1
				Cntfr	0	1	0	1	Cntfr		Mx2	0	1	0	1	Mx2
				Col11a1	0	1	0	1	Col11a1		Myof	0	1	0	1	Myof
				Col12a1	0	1	0	1	Col12a1		Naip2	0	1	0	1	Naip2
				Col14a1	0	1	0	1	Col14a1		Naip5	0	1	0	1	Naip5
				Col15a1	0	1	0	1	Col15a1		Nampt	0	1	0	1	Nampt
				Col16a1	0	1	0	1	Col16a1		Napsa	0	1	0	1	Napsa
				Col1a1	0	1	0	1	Col1a1		Ncf1	0	1	0	1	Ncf1
				Col1a2	0	1	0	1	Col1a2		Ndnf	0	1	0	1	Ndnf
				Col27a1	0	1	0	1	Col27a1		Nebl	0	1	0	1	Nebl
				Col3a1	0	1	0	1	Col3a1		Nfkbiz	0	1	0	1	Nfkbiz
				Col5a1	0	1	0	1	Col5a1		Nkd2	0	1	0	1	Nkd2
				Col6a1	0	1	0	1	Col6a1		Nkg7	0	1	0	1	Nkg7
				Col6a2	0	1	0	1	Col6a2		Nlrc5	0	1	0	1	Nlrc5
				Col6a3	0	1	0	1	Col6a3		Nlrp5.ps	0	1	0	1	Nlrp5.ps
				Col6a5	0	1	0	1	Col6a5		Nnat	0	1	0	1	Nnat
				Col8a1	0	1	0	1	Col8a1		Nos1	0	1	0	1	Nos1
				Col8a2	0	1	0	1	Col8a2		Nphs2	0	1	0	1	Nphs2
				Comp	0	1	0	1	Comp		Npr3	0	1	0	1	Npr3
				Coro2b	0	1	0	1	Coro2b		Npy	0	1	0	1	Npy
				Cpxm1	0	1	0	1	Cpxm1		Nxpe3	0	1	0	1	Nxpe3
				Cpz	0	1	0	1	Cpz		Nxph3	0	1	0	1	Nxph3
				Creb3l1	0	1	0	1	Creb3l1		Nyap2	0	1	0	1	Nyap2
				Crispld1	0	1	0	1	Crispld1		Oas1a	0	1	0	1	Oas1a
				Csnk1g2	0	1	0	1	Csnk1g2		Oas1b	0	1	0	1	Oas1b
				Ctdnep1	0	1	0	1	Ctdnep1		Oas1g	0	1	0	1	Oas1g
				Ctdsp1	0	1	0	1	Ctdsp1		Oas2	0	1	0	1	Oas2
				Cthrc1	0	1	0	1	Cthrc1		Oasl1	0	1	0	1	Oasl1
				Ctnnb1	0	1	0	1	Ctnnb1		Oasl2	0	1	0	1	Oasl2
				Cul7	0	1	0	1	Cul7		Olfr1372.ps1	0	1	0	1	Olfr1372.ps1
				Cyhr1	0	1	0	1	Cyhr1		Oosp1	0	1	0	1	Oosp1
				Cyp2f2	0	1	0	1	Cyp2f2		Osr1	0	1	0	1	Osr1
				D630003M21Rik	0	1	0	1	D630003M21Rik		Ostm1	0	1	0	1	Ostm1
				Daam2	0	1	0	1	Daam2		Otop3	0	1	0	1	Otop3
				Dact1	0	1	0	1	Dact1		Pamr1	0	1	0	1	Pamr1
				Dact3	0	1	0	1	Dact3		Pan2	0	1	0	1	Pan2
				Dap	0	1	0	1	Dap		Pappa2	0	1	0	1	Pappa2
				Dapk2	0	1	0	1	Dapk2		Parp14	0	1	0	1	Parp14
				Dbn1	0	1	0	1	Dbn1		Parvg	0	1	0	1	Parvg
				Dcakd	0	1	0	1	Dcakd		Pbx3	0	1	0	1	Pbx3
				Dchs1	0	1	0	1	Dchs1		Pdc	0	1	0	1	Pdc
				Ddr2	0	1	0	1	Ddr2		Pdcd1	0	1	0	1	Pdcd1
				Dipk2a	0	1	0	1	Dipk2a		Pde1a	0	1	0	1	Pde1a
				Dkk2	0	1	0	1	Dkk2		Pde1b	0	1	0	1	Pde1b
				Dlg4	0	1	0	1	Dlg4		Pdzk1ip1	0	1	0	1	Pdzk1ip1
				Dlx5	0	1	0	1	Dlx5		Pgf	0	1	0	1	Pgf
				Dmpk	0	1	0	1	Dmpk		Pglyrp1	0	1	0	1	Pglyrp1
				Dnaja1	0	1	0	1	Dnaja1		Phactr1	0	1	0	1	Phactr1
				Dner	0	1	0	1	Dner		Phf11d	0	1	0	1	Phf11d
				Dnm1	0	1	0	1	Dnm1		Phf24	0	1	0	1	Phf24
				Dpp9	0	1	0	1	Dpp9		Pirb	0	1	0	1	Pirb
				Dpysl3	0	1	0	1	Dpysl3		Pla2g4a	0	1	0	1	Pla2g4a
				Dusp8	0	1	0	1	Dusp8		Pla2g7	0	1	0	1	Pla2g7
				Dync1i1	0	1	0	1	Dync1i1		Plac8	0	1	0	1	Plac8
				Dynll1	0	1	0	1	Dynll1		Plek	0	1	0	1	Plek
				Eda	0	1	0	1	Eda		Plscr1	0	1	0	1	Plscr1
				Ednra	0	1	0	1	Ednra		Plscr2	0	1	0	1	Plscr2
				Efna5	0	1	0	1	Efna5		Plscr4	0	1	0	1	Plscr4
				Efnb1	0	1	0	1	Efnb1		Pnpla7	0	1	0	1	Pnpla7
				Efs	0	1	0	1	Efs		Pou2af1	0	1	0	1	Pou2af1
				Egfl6	0	1	0	1	Egfl6		Pou2f2	0	1	0	1	Pou2f2
				Eif4ebp2	0	1	0	1	Eif4ebp2		Ppp1r1a	0	1	0	1	Ppp1r1a
				Elfn2	0	1	0	1	Elfn2		Ppp2r2b	0	1	0	1	Ppp2r2b
				Elmo1	0	1	0	1	Elmo1		Prg2	0	1	0	1	Prg2
				Emc10	0	1	0	1	Emc10		Prkcz	0	1	0	1	Prkcz
				Emid1	0	1	0	1	Emid1		Prnp	0	1	0	1	Prnp
				Emilin1	0	1	0	1	Emilin1		Prodh	0	1	0	1	Prodh
				Emilin3	0	1	0	1	Emilin3		Prr29	0	1	0	1	Prr29
				Emp2	0	1	0	1	Emp2		Prrxl1	0	1	0	1	Prrxl1
				Enah	0	1	0	1	Enah		Prtn3	0	1	0	1	Prtn3
				Epb41l2	0	1	0	1	Epb41l2		Psd4	0	1	0	1	Psd4
				Epb41l3	0	1	0	1	Epb41l3		Psmb8	0	1	0	1	Psmb8
				Ephb2	0	1	0	1	Ephb2		Psmb9	0	1	0	1	Psmb9
				Ephb3	0	1	0	1	Ephb3		Ptgds	0	1	0	1	Ptgds
				Epn1	0	1	0	1	Epn1		Ptpn22	0	1	0	1	Ptpn22
				Fam110a	0	1	0	1	Fam110a		Ptprc	0	1	0	1	Ptprc
				Fam114a1	0	1	0	1	Fam114a1		Ptprn	0	1	0	1	Ptprn
				Fam167a	0	1	0	1	Fam167a		Rab19	0	1	0	1	Rab19
				Fam171b	0	1	0	1	Fam171b		Rab27a	0	1	0	1	Rab27a
				Fam222a	0	1	0	1	Fam222a		Rab44	0	1	0	1	Rab44
				Fam53c	0	1	0	1	Fam53c		Rabepk	0	1	0	1	Rabepk
				Fat2	0	1	0	1	Fat2		Rac2	0	1	0	1	Rac2
				Fat3	0	1	0	1	Fat3		Ramp1	0	1	0	1	Ramp1
				Fbln1	0	1	0	1	Fbln1		Ranbp3l	0	1	0	1	Ranbp3l
				Fbln7	0	1	0	1	Fbln7		Rasal3	0	1	0	1	Rasal3
				Fbn1	0	1	0	1	Fbn1		Rasgef1b	0	1	0	1	Rasgef1b
				Fbrs	0	1	0	1	Fbrs		Rgr	0	1	0	1	Rgr
				Fermt2	0	1	0	1	Fermt2		Rgs2	0	1	0	1	Rgs2
				Fgd1	0	1	0	1	Fgd1		Rhou	0	1	0	1	Rhou
				Fgfr3	0	1	0	1	Fgfr3		Rlbp1	0	1	0	1	Rlbp1
				Fgl2	0	1	0	1	Fgl2		Rnf213	0	1	0	1	Rnf213
				Fhod3	0	1	0	1	Fhod3		Rogdi	0	1	0	1	Rogdi
				Fkbp10	0	1	0	1	Fkbp10		Rorb	0	1	0	1	Rorb
				Fkbp14	0	1	0	1	Fkbp14		Rtp4	0	1	0	1	Rtp4
				Fkbp4	0	1	0	1	Fkbp4		Samsn1	0	1	0	1	Samsn1
				Flrt1	0	1	0	1	Flrt1		Saraf	0	1	0	1	Saraf
				Fmod	0	1	0	1	Fmod		Scara3	0	1	0	1	Scara3
				Fndc1	0	1	0	1	Fndc1		Scd1	0	1	0	1	Scd1
				Fndc4	0	1	0	1	Fndc4		Scg5	0	1	0	1	Scg5
				Foxp4	0	1	0	1	Foxp4		Scgn	0	1	0	1	Scgn
				Frem2	0	1	0	1	Frem2		Sel1l3	0	1	0	1	Sel1l3
				Fscn1	0	1	0	1	Fscn1		Selplg	0	1	0	1	Selplg
				Fstl4	0	1	0	1	Fstl4		Sema3d	0	1	0	1	Sema3d
				Galnt10	0	1	0	1	Galnt10		Sema5b	0	1	0	1	Sema5b
				Gask1a	0	1	0	1	Gask1a		Serpinb6b	0	1	0	1	Serpinb6b
				Gdf10	0	1	0	1	Gdf10		Serpine1	0	1	0	1	Serpine1
				Gid4	0	1	0	1	Gid4		Setdb2	0	1	0	1	Setdb2
				Git1	0	1	0	1	Git1		Sgip1	0	1	0	1	Sgip1
				Gja1	0	1	0	1	Gja1		Sh3gl3	0	1	0	1	Sh3gl3
				Gli1	0	1	0	1	Gli1		Shisa9	0	1	0	1	Shisa9
				Glis2	0	1	0	1	Glis2		Shtn1	0	1	0	1	Shtn1
				Gm10535	0	1	0	1	Gm10535		Skap2	0	1	0	1	Skap2
				Gm14597	0	1	0	1	Gm14597		Slamf7	0	1	0	1	Slamf7
				Gm21887	0	1	0	1	Gm21887		Slamf9	0	1	0	1	Slamf9
				Gm23935	0	1	0	1	Gm23935		Slc13a3	0	1	0	1	Slc13a3
				Gm24270	0	1	0	1	Gm24270		Slc16a11	0	1	0	1	Slc16a11
				Gm47887	0	1	0	1	Gm47887		Slc1a3	0	1	0	1	Slc1a3
				Gnb2	0	1	0	1	Gnb2		Slc1a5	0	1	0	1	Slc1a5
				Gpc1	0	1	0	1	Gpc1		Slc22a2	0	1	0	1	Slc22a2
				Gpha2	0	1	0	1	Gpha2		Slc22a6	0	1	0	1	Slc22a6
				Gpr153	0	1	0	1	Gpr153		Slc22a8	0	1	0	1	Slc22a8
				Gprc5c	0	1	0	1	Gprc5c		Slc25a28	0	1	0	1	Slc25a28
				Gpx3	0	1	0	1	Gpx3		Slc28a2	0	1	0	1	Slc28a2
				Gpx7	0	1	0	1	Gpx7		Slc2a1	0	1	0	1	Slc2a1
				Grb10	0	1	0	1	Grb10		Slc2a3	0	1	0	1	Slc2a3
				Grm4	0	1	0	1	Grm4		Slc2a4	0	1	0	1	Slc2a4
				Gsk3a	0	1	0	1	Gsk3a		Slc6a1	0	1	0	1	Slc6a1
				Gulp1	0	1	0	1	Gulp1		Slc6a13	0	1	0	1	Slc6a13
				Gxylt2	0	1	0	1	Gxylt2		Slc6a2	0	1	0	1	Slc6a2
				Gzma	0	1	0	1	Gzma		Slc6a20a	0	1	0	1	Slc6a20a
				H19	0	1	0	1	H19		Slc7a11	0	1	0	1	Slc7a11
				H3c15	0	1	0	1	H3c15		Slc7a14	0	1	0	1	Slc7a14
				Hapln1	0	1	0	1	Hapln1		Slc7a2	0	1	0	1	Slc7a2
				Hcn3	0	1	0	1	Hcn3		Slc8a1	0	1	0	1	Slc8a1
				Hdac7	0	1	0	1	Hdac7		Slc9a2	0	1	0	1	Slc9a2
				Heyl	0	1	0	1	Heyl		Slco1a4	0	1	0	1	Slco1a4
				Hic1	0	1	0	1	Hic1		Slfn1	0	1	0	1	Slfn1
				Hmcn1	0	1	0	1	Hmcn1		Slfn10.ps	0	1	0	1	Slfn10.ps
				Hoxa2	0	1	0	1	Hoxa2		Slfn2	0	1	0	1	Slfn2
				Hpgd	0	1	0	1	Hpgd		Slfn5	0	1	0	1	Slfn5
				Hr	0	1	0	1	Hr		Slfn8	0	1	0	1	Slfn8
				Hsp90ab1	0	1	0	1	Hsp90ab1		Snhg11	0	1	0	1	Snhg11
				Hspg2	0	1	0	1	Hspg2		Soat2	0	1	0	1	Soat2
				Htra1	0	1	0	1	Htra1		Sp100	0	1	0	1	Sp100
				Htra3	0	1	0	1	Htra3		Sp110	0	1	0	1	Sp110
				Igf1	0	1	0	1	Igf1		Sp140	0	1	0	1	Sp140
				Igf2	0	1	0	1	Igf2		Sphk1	0	1	0	1	Sphk1
				Igf2bp2	0	1	0	1	Igf2bp2		Spink4	0	1	0	1	Spink4
				Igf2r	0	1	0	1	Igf2r		Spn	0	1	0	1	Spn
				Igfbp5	0	1	0	1	Igfbp5		Spock1	0	1	0	1	Spock1
				Igfbp7	0	1	0	1	Igfbp7		Sptbn4	0	1	0	1	Sptbn4
				Il11ra1	0	1	0	1	Il11ra1		Srsf5	0	1	0	1	Srsf5
				Impg1	0	1	0	1	Impg1		St8sia6	0	1	0	1	St8sia6
				Insc	0	1	0	1	Insc		Stat1	0	1	0	1	Stat1
				Iqsec3	0	1	0	1	Iqsec3		Stat2	0	1	0	1	Stat2
				Irx3	0	1	0	1	Irx3		Stk33	0	1	0	1	Stk33
				Irx5	0	1	0	1	Irx5		Sv2b	0	1	0	1	Sv2b
				Itga11	0	1	0	1	Itga11		Syk	0	1	0	1	Syk
				Itm2a	0	1	0	1	Itm2a		Synm	0	1	0	1	Synm
				Itsn1	0	1	0	1	Itsn1		Syt1	0	1	0	1	Syt1
				Kazald1	0	1	0	1	Kazald1		Syt10	0	1	0	1	Syt10
				Kcns1	0	1	0	1	Kcns1		Syt4	0	1	0	1	Syt4
				Kctd10	0	1	0	1	Kctd10		Tal2	0	1	0	1	Tal2
				Kctd15	0	1	0	1	Kctd15		Tap1	0	1	0	1	Tap1
				Kdelr3	0	1	0	1	Kdelr3		Tchh	0	1	0	1	Tchh
				Kdm6b	0	1	0	1	Kdm6b		Tfap2b	0	1	0	1	Tfap2b
				Khsrp	0	1	0	1	Khsrp		Thbs1	0	1	0	1	Thbs1
				Kirrel	0	1	0	1	Kirrel		Thsd4	0	1	0	1	Thsd4
				Kmt5c	0	1	0	1	Kmt5c		Tlr13	0	1	0	1	Tlr13
				Kremen1	0	1	0	1	Kremen1		Tlr7	0	1	0	1	Tlr7
				Lama2	0	1	0	1	Lama2		Tmem154	0	1	0	1	Tmem154
				Lasp1	0	1	0	1	Lasp1		Tmem179	0	1	0	1	Tmem179
				Lcat	0	1	0	1	Lcat		Tmem252	0	1	0	1	Tmem252
				Lgi2	0	1	0	1	Lgi2		Tmem59l	0	1	0	1	Tmem59l
				Lman1	0	1	0	1	Lman1		Tmod2	0	1	0	1	Tmod2
				Lmna	0	1	0	1	Lmna		Tnfrsf11b	0	1	0	1	Tnfrsf11b
				Lmo7	0	1	0	1	Lmo7		Tnfsf10	0	1	0	1	Tnfsf10
				Lmx1b	0	1	0	1	Lmx1b		Traf3ip3	0	1	0	1	Traf3ip3
				Loxl1	0	1	0	1	Loxl1		Trank1	0	1	0	1	Trank1
				Loxl2	0	1	0	1	Loxl2		Trbc2	0	1	0	1	Trbc2
				Lrch2	0	1	0	1	Lrch2		Trem2	0	1	0	1	Trem2
				Lrig3	0	1	0	1	Lrig3		Treml1	0	1	0	1	Treml1
				Lrp4	0	1	0	1	Lrp4		Trim30a	0	1	0	1	Trim30a
				Lrp5	0	1	0	1	Lrp5		Trim30d	0	1	0	1	Trim30d
				Lrrc15	0	1	0	1	Lrrc15		Trpm1	0	1	0	1	Trpm1
				Lrrc38	0	1	0	1	Lrrc38		Trpm2	0	1	0	1	Trpm2
				Lrrn1	0	1	0	1	Lrrn1		Trpm6	0	1	0	1	Trpm6
				Ltbp3	0	1	0	1	Ltbp3		Tspan8	0	1	0	1	Tspan8
				Lypd6b	0	1	0	1	Lypd6b		Tubb1	0	1	0	1	Tubb1
				Maged1	0	1	0	1	Maged1		Uchl1	0	1	0	1	Uchl1
				Map1lc3a	0	1	0	1	Map1lc3a		Upk1b	0	1	0	1	Upk1b
				Map2k6	0	1	0	1	Map2k6		Usp18	0	1	0	1	Usp18
				Map3k10	0	1	0	1	Map3k10		Vav1	0	1	0	1	Vav1
				Map7d1	0	1	0	1	Map7d1		Vcam1	0	1	0	1	Vcam1
				2022-03-09	0	1	0	1	2022-03-09		Vill	0	1	0	1	Vill
				Mark4	0	1	0	1	Mark4		Vipr2	0	1	0	1	Vipr2
				Mat2a	0	1	0	1	Mat2a		Vsig4	0	1	0	1	Vsig4
				Matn2	0	1	0	1	Matn2		Vwf	0	1	0	1	Vwf
				Matn4	0	1	0	1	Matn4		Wnt6	0	1	0	1	Wnt6
				Maz	0	1	0	1	Maz		X1700030C10Rik.1	0	1	0	1	X1700030C10Rik.1
				Mbtps1	0	1	0	1	Mbtps1		X5830411N06Rik	0	1	0	1	X5830411N06Rik
				Mdfic	0	1	0	1	Mdfic		Zbp1	0	1	0	1	Zbp1
				Mdga1	0	1	0	1	Mdga1		Zc3hav1	0	1	0	1	Zc3hav1
				Mef2d	0	1	0	1	Mef2d		Ccl12	0	1	1	1	Ccl12
				Megf6	0	1	0	1	Megf6		Cma1	1	0	0	1	Cma1
				Mest	0	1	0	1	Mest		Cpa3	1	0	0	1	Cpa3
				Mfap2	0	1	0	1	Mfap2		Epha3	1	0	0	1	Epha3
				Mfap4	0	1	0	1	Mfap4		Hacd4	1	0	0	1	Hacd4
				Mlec	0	1	0	1	Mlec		Ighv1.54	1	0	0	1	Ighv1.54
				Mlf2	0	1	0	1	Mlf2		Igkv4.70	1	0	0	1	Igkv4.70
				Mllt1	0	1	0	1	Mllt1		Mbnl1	1	0	0	1	Mbnl1
				Mmp15	0	1	0	1	Mmp15		Mcpt4	1	0	0	1	Mcpt4
				Morf4l2	0	1	0	1	Morf4l2		Nctc1	1	0	0	1	Nctc1
				Mospd3	0	1	0	1	Mospd3		Serpinb1a	1	0	0	1	Serpinb1a
				Mpp2	0	1	0	1	Mpp2		Tpsb2	1	0	0	1	Tpsb2
				Mpp3	0	1	0	1	Mpp3		Ighv1.50	1	1	0	1	Ighv1.50
				Mpzl1	0	1	0	1	Mpzl1		Igkv5.43	1	1	0	1	Igkv5.43
				Mrc2	0	1	0	1	Mrc2		Bpifb4	0	0	1	0	Bpifb4
				Msi1	0	1	0	1	Msi1		Bpifb6	0	0	1	0	Bpifb6
				Mtss2	0	1	0	1	Mtss2		Gpx6	0	0	1	0	Gpx6
				Mxd4	0	1	0	1	Mxd4		Podxl	0	0	1	0	Podxl
				Mxra8	0	1	0	1	Mxra8		Shisal1	0	0	1	0	Shisal1
				Myadm	0	1	0	1	Myadm		Synpo	0	0	1	0	Synpo
				Mycn	0	1	0	1	Mycn		Vmo1	0	0	1	0	Vmo1
				Myl6	0	1	0	1	Myl6		A4galt	0	1	0	0	A4galt
				Myl9	0	1	0	1	Myl9		A730046J19Rik	0	1	0	0	A730046J19Rik
				Mylk	0	1	0	1	Mylk		Aanat	0	1	0	0	Aanat
				Myo10	0	1	0	1	Myo10		Abca7	0	1	0	0	Abca7
				Ncor2	0	1	0	1	Ncor2		Abcc1	0	1	0	0	Abcc1
				Ndn	0	1	0	1	Ndn		Acr	0	1	0	0	Acr
				Nectin3	0	1	0	1	Nectin3		Acsbg1	0	1	0	0	Acsbg1
				Neo1	0	1	0	1	Neo1		Acsm4	0	1	0	0	Acsm4
				Neurl1a	0	1	0	1	Neurl1a		Adamts8	0	1	0	0	Adamts8
				Nfatc4	0	1	0	1	Nfatc4		Adcy1	0	1	0	0	Adcy1
				Nfic	0	1	0	1	Nfic		Adcy5	0	1	0	0	Adcy5
				Nfix	0	1	0	1	Nfix		Adh7	0	1	0	0	Adh7
				Nfya	0	1	0	1	Nfya		Adhfe1	0	1	0	0	Adhfe1
				Nid1	0	1	0	1	Nid1		Adrb2	0	1	0	0	Adrb2
				Nid2	0	1	0	1	Nid2		Aim2	0	1	0	0	Aim2
				Nog	0	1	0	1	Nog		Akap6	0	1	0	0	Akap6
				Npnt	0	1	0	1	Npnt		Akr1b10	0	1	0	0	Akr1b10
				Nppc	0	1	0	1	Nppc		Alpk1	0	1	0	0	Alpk1
				Nptx1	0	1	0	1	Nptx1		Ank3	0	1	0	0	Ank3
				Nr2f6	0	1	0	1	Nr2f6		Apobr	0	1	0	0	Apobr
				Nrep	0	1	0	1	Nrep		Apol10b	0	1	0	0	Apol10b
				Nrk	0	1	0	1	Nrk		Apol11b	0	1	0	0	Apol11b
				Ntn3	0	1	0	1	Ntn3		Arrdc3	0	1	0	0	Arrdc3
				Nuak1	0	1	0	1	Nuak1		Astn1	0	1	0	0	Astn1
				Numbl	0	1	0	1	Numbl		Atp10a	0	1	0	0	Atp10a
				Obsl1	0	1	0	1	Obsl1		Atp10d	0	1	0	0	Atp10d
				Olfml2b	0	1	0	1	Olfml2b		Atp2a3	0	1	0	0	Atp2a3
				Olfml3	0	1	0	1	Olfml3		Atp8b4	0	1	0	0	Atp8b4
				Omd	0	1	0	1	Omd		Auh	0	1	0	0	Auh
				Osbpl5	0	1	0	1	Osbpl5		B130024G19Rik	0	1	0	0	B130024G19Rik
				Ostn	0	1	0	1	Ostn		Bbox1	0	1	0	0	Bbox1
				P3h1	0	1	0	1	P3h1		Bin2	0	1	0	0	Bin2
				P3h3	0	1	0	1	P3h3		Bmp8a	0	1	0	0	Bmp8a
				P4ha1	0	1	0	1	P4ha1		C3ar1	0	1	0	0	C3ar1
				Pak1	0	1	0	1	Pak1		Car14	0	1	0	0	Car14
				Palld	0	1	0	1	Palld		Casp7	0	1	0	0	Casp7
				Pam	0	1	0	1	Pam		Cbs	0	1	0	0	Cbs
				Papln	0	1	0	1	Papln		Ccdc85a	0	1	0	0	Ccdc85a
				Pard6g	0	1	0	1	Pard6g		Ccdc88c	0	1	0	0	Ccdc88c
				Pax1	0	1	0	1	Pax1		Ccdc9b	0	1	0	0	Ccdc9b
				Pcbp1	0	1	0	1	Pcbp1		Ccl2	0	1	0	0	Ccl2
				Pcbp3	0	1	0	1	Pcbp3		Ccr1	0	1	0	0	Ccr1
				Pcbp4	0	1	0	1	Pcbp4		Cdh15	0	1	0	0	Cdh15
				Pcdh1	0	1	0	1	Pcdh1		Ceacam1	0	1	0	0	Ceacam1
				Pcdhgc3	0	1	0	1	Pcdhgc3		Ceacam16	0	1	0	0	Ceacam16
				Pcolce	0	1	0	1	Pcolce		Cep85	0	1	0	0	Cep85
				Pcsk6	0	1	0	1	Pcsk6		Ch25h	0	1	0	0	Ch25h
				Pde11a	0	1	0	1	Pde11a		Chrnb4	0	1	0	0	Chrnb4
				Pdgfrb	0	1	0	1	Pdgfrb		Clec12a	0	1	0	0	Clec12a
				Pdlim7	0	1	0	1	Pdlim7		Clec2d	0	1	0	0	Clec2d
				Pea15a	0	1	0	1	Pea15a		Clic5	0	1	0	0	Clic5
				Peg3	0	1	0	1	Peg3		Clu	0	1	0	0	Clu
				Pi15	0	1	0	1	Pi15		Cox8b	0	1	0	0	Cox8b
				Pigt	0	1	0	1	Pigt		Crlf1	0	1	0	0	Crlf1
				Pik3r2	0	1	0	1	Pik3r2		Crmp1	0	1	0	0	Crmp1
				Pitpnm1	0	1	0	1	Pitpnm1		Csf2rb	0	1	0	0	Csf2rb
				Pitpnm3	0	1	0	1	Pitpnm3		Csf2rb2	0	1	0	0	Csf2rb2
				Plch2	0	1	0	1	Plch2		Csf3r	0	1	0	0	Csf3r
				Plekhg2	0	1	0	1	Plekhg2		Ctnna1	0	1	0	0	Ctnna1
				Plekhg4	0	1	0	1	Plekhg4		Ctsc	0	1	0	0	Ctsc
				Plpp3	0	1	0	1	Plpp3		Cxcl10	0	1	0	0	Cxcl10
				Plpp5	0	1	0	1	Plpp5		Cxcr2	0	1	0	0	Cxcr2
				Plvap	0	1	0	1	Plvap		Cyp2e1	0	1	0	0	Cyp2e1
				Plxnd1	0	1	0	1	Plxnd1		Cyth4	0	1	0	0	Cyth4
				Pnmal2	0	1	0	1	Pnmal2		Dcbld2	0	1	0	0	Dcbld2
				Pofut2	0	1	0	1	Pofut2		Dclk3	0	1	0	0	Dclk3
				Poglut3	0	1	0	1	Poglut3		Ddx25	0	1	0	0	Ddx25
				Postn	0	1	0	1	Postn		Dennd1c	0	1	0	0	Dennd1c
				Ppard	0	1	0	1	Ppard		Dock5	0	1	0	0	Dock5
				Ppfibp2	0	1	0	1	Ppfibp2		Dock9	0	1	0	0	Dock9
				Ppic	0	1	0	1	Ppic		Dst	0	1	0	0	Dst
				Ppm1h	0	1	0	1	Ppm1h		Edn1	0	1	0	0	Edn1
				Ppp1r9b	0	1	0	1	Ppp1r9b		Enpp1	0	1	0	0	Enpp1
				Ppp2r5b	0	1	0	1	Ppp2r5b		Entpd1	0	1	0	0	Entpd1
				Pprc1	0	1	0	1	Pprc1		Eogt	0	1	0	0	Eogt
				Prkaca	0	1	0	1	Prkaca		Eps8l1	0	1	0	0	Eps8l1
				Prokr1	0	1	0	1	Prokr1		F10	0	1	0	0	F10
				Prr12	0	1	0	1	Prr12		F7	0	1	0	0	F7
				Prr33	0	1	0	1	Prr33		Fdft1	0	1	0	0	Fdft1
				Prr7	0	1	0	1	Prr7		Fgr	0	1	0	0	Fgr
				Prrc1	0	1	0	1	Prrc1		Flt3	0	1	0	0	Flt3
				Prrc2a	0	1	0	1	Prrc2a		Fmo6	0	1	0	0	Fmo6
				Prrc2b	0	1	0	1	Prrc2b		Gabrr3	0	1	0	0	Gabrr3
				Prrg3	0	1	0	1	Prrg3		Gbp9	0	1	0	0	Gbp9
				Prrx2	0	1	0	1	Prrx2		Gclc	0	1	0	0	Gclc
				Ptch2	0	1	0	1	Ptch2		Gfap	0	1	0	0	Gfap
				Ptgfr	0	1	0	1	Ptgfr		Gimap8	0	1	0	0	Gimap8
				Ptgfrn	0	1	0	1	Ptgfrn		Glipr1	0	1	0	0	Glipr1
				Pth1r	0	1	0	1	Pth1r		Gm12185	0	1	0	0	Gm12185
				Ptk7	0	1	0	1	Ptk7		Gm12250	0	1	0	0	Gm12250
				Ptms	0	1	0	1	Ptms		Gm15222	0	1	0	0	Gm15222
				Ptprs	0	1	0	1	Ptprs		Gm2619	0	1	0	0	Gm2619
				Ptprv	0	1	0	1	Ptprv		Gm26704	0	1	0	0	Gm26704
				Pxdn	0	1	0	1	Pxdn		Gm27032	0	1	0	0	Gm27032
				Pycr1	0	1	0	1	Pycr1		Gm30571	0	1	0	0	Gm30571
				Pygo2	0	1	0	1	Pygo2		Gm35572	0	1	0	0	Gm35572
				R3hdm2	0	1	0	1	R3hdm2		Gm37795	0	1	0	0	Gm37795
				Rab27b	0	1	0	1	Rab27b		Gm44421	0	1	0	0	Gm44421
				Rab3a	0	1	0	1	Rab3a		Gm44829	0	1	0	0	Gm44829
				Rap1gap	0	1	0	1	Rap1gap		Gm5424	0	1	0	0	Gm5424
				Rap1gap2	0	1	0	1	Rap1gap2		Gm5547	0	1	0	0	Gm5547
				Rara	0	1	0	1	Rara		Gm8369	0	1	0	0	Gm8369
				Rarg	0	1	0	1	Rarg		Gpr182	0	1	0	0	Gpr182
				Rbfox2	0	1	0	1	Rbfox2		Gpr183	0	1	0	0	Gpr183
				Rbpjl	0	1	0	1	Rbpjl		Gpr31c	0	1	0	0	Gpr31c
				Rcn1	0	1	0	1	Rcn1		Gpr4	0	1	0	0	Gpr4
				Rcn3	0	1	0	1	Rcn3		Grrp1	0	1	0	0	Grrp1
				Reep5	0	1	0	1	Reep5		Grtp1	0	1	0	0	Grtp1
				Retreg1	0	1	0	1	Retreg1		Gucy1b1	0	1	0	0	Gucy1b1
				Rflnb	0	1	0	1	Rflnb		H2.M11	0	1	0	0	H2.M11
				Rfng	0	1	0	1	Rfng		H2.M9	0	1	0	0	H2.M9
				Rgl1	0	1	0	1	Rgl1		H2.Q10	0	1	0	0	H2.Q10
				Rgs4	0	1	0	1	Rgs4		Hap1	0	1	0	0	Hap1
				Rin2	0	1	0	1	Rin2		Hhipl1	0	1	0	0	Hhipl1
				Rnf10	0	1	0	1	Rnf10		Hk2	0	1	0	0	Hk2
				Rnf144a	0	1	0	1	Rnf144a		Hoxb4	0	1	0	0	Hoxb4
				Rnf157	0	1	0	1	Rnf157		Hpca	0	1	0	0	Hpca
				Rnf187	0	1	0	1	Rnf187		Hrct1	0	1	0	0	Hrct1
				Rnf24	0	1	0	1	Rnf24		Hspa12a	0	1	0	0	Hspa12a
				Robo2	0	1	0	1	Robo2		Htt	0	1	0	0	Htt
				Ror2	0	1	0	1	Ror2		Icam1	0	1	0	0	Icam1
				Rs1	0	1	0	1	Rs1		Icosl	0	1	0	0	Icosl
				Rtl6	0	1	0	1	Rtl6		Ifi206	0	1	0	0	Ifi206
				Runx2	0	1	0	1	Runx2		Ifi208	0	1	0	0	Ifi208
				Rusc2	0	1	0	1	Rusc2		Ifi209	0	1	0	0	Ifi209
				Rxra	0	1	0	1	Rxra		Ighv1.18	0	1	0	0	Ighv1.18
				Samd4b	0	1	0	1	Samd4b		Ighv1.26	0	1	0	0	Ighv1.26
				Sar1a	0	1	0	1	Sar1a		Ighv1.58	0	1	0	0	Ighv1.58
				Sarm1	0	1	0	1	Sarm1		Ighv1.69	0	1	0	0	Ighv1.69
				Sbk1	0	1	0	1	Sbk1		Ighv1.74	0	1	0	0	Ighv1.74
				Scarf2	0	1	0	1	Scarf2		Ighv1.76	0	1	0	0	Ighv1.76
				Scn1b	0	1	0	1	Scn1b		Ighv1.77	0	1	0	0	Ighv1.77
				Scn2b	0	1	0	1	Scn2b		Ighv1.80	0	1	0	0	Ighv1.80
				Scube1	0	1	0	1	Scube1		Ighv1.85	0	1	0	0	Ighv1.85
				Sdc2	0	1	0	1	Sdc2		Ighv10.3	0	1	0	0	Ighv10.3
				Sdc3	0	1	0	1	Sdc3		Ighv2.2	0	1	0	0	Ighv2.2
				Sec24d	0	1	0	1	Sec24d		Ighv2.9	0	1	0	0	Ighv2.9
				Sec31a	0	1	0	1	Sec31a		Ighv5.12	0	1	0	0	Ighv5.12
				Selenon	0	1	0	1	Selenon		Ighv5.6	0	1	0	0	Ighv5.6
				Sema3f	0	1	0	1	Sema3f		Ighv6.6	0	1	0	0	Ighv6.6
				2022-09-11	0	1	0	1	2022-09-11		Igkv1.110	0	1	0	0	Igkv1.110
				2022-09-08	0	1	0	1	2022-09-08		Igkv12.41	0	1	0	0	Igkv12.41
				Serinc5	0	1	0	1	Serinc5		Igkv14.130	0	1	0	0	Igkv14.130
				Serpinf1	0	1	0	1	Serpinf1		Igkv4.50	0	1	0	0	Igkv4.50
				Serpinh1	0	1	0	1	Serpinh1		Igkv4.59	0	1	0	0	Igkv4.59
				Sertad4	0	1	0	1	Sertad4		Igkv4.79	0	1	0	0	Igkv4.79
				Setd1b	0	1	0	1	Setd1b		Igkv6.20	0	1	0	0	Igkv6.20
				Setd7	0	1	0	1	Setd7		Igkv8.19	0	1	0	0	Igkv8.19
				Sgsm2	0	1	0	1	Sgsm2		Igkv8.28	0	1	0	0	Igkv8.28
				Sh2b1	0	1	0	1	Sh2b1		Iglv3	0	1	0	0	Iglv3
				Sh3bp4	0	1	0	1	Sh3bp4		Iigp1	0	1	0	0	Iigp1
				Sh3pxd2a	0	1	0	1	Sh3pxd2a		Il12rb1	0	1	0	0	Il12rb1
				Shank1	0	1	0	1	Shank1		Il1r2	0	1	0	0	Il1r2
				Shc1	0	1	0	1	Shc1		Il9r	0	1	0	0	Il9r
				Shisa2	0	1	0	1	Shisa2		Inpp5d	0	1	0	0	Inpp5d
				Shisa3	0	1	0	1	Shisa3		Ipcef1	0	1	0	0	Ipcef1
				Shisa4	0	1	0	1	Shisa4		Irf7	0	1	0	0	Irf7
				Shroom3	0	1	0	1	Shroom3		Irgm1	0	1	0	0	Irgm1
				Six2	0	1	0	1	Six2		Irs2	0	1	0	0	Irs2
				Six5	0	1	0	1	Six5		Itgb2l	0	1	0	0	Itgb2l
				Ski	0	1	0	1	Ski		Jaml	0	1	0	0	Jaml
				Slc12a5	0	1	0	1	Slc12a5		Kbtbd11	0	1	0	0	Kbtbd11
				Slc16a7	0	1	0	1	Slc16a7		Kcnj10	0	1	0	0	Kcnj10
				Slc17a7	0	1	0	1	Slc17a7		Kcnmb2	0	1	0	0	Kcnmb2
				Slc20a2	0	1	0	1	Slc20a2		Klra2	0	1	0	0	Klra2
				Slc24a1	0	1	0	1	Slc24a1		Kng2	0	1	0	0	Kng2
				Slc24a3	0	1	0	1	Slc24a3		Lao1	0	1	0	0	Lao1
				Slc27a3	0	1	0	1	Slc27a3		Ldha	0	1	0	0	Ldha
				Slc27a4	0	1	0	1	Slc27a4		Lepr	0	1	0	0	Lepr
				Slc2a10	0	1	0	1	Slc2a10		Lfng	0	1	0	0	Lfng
				Slc36a2	0	1	0	1	Slc36a2		Lgals3bp	0	1	0	0	Lgals3bp
				Slc39a3	0	1	0	1	Slc39a3		Lilra5	0	1	0	0	Lilra5
				Slc47a2	0	1	0	1	Slc47a2		Lmbr1l	0	1	0	0	Lmbr1l
				Slc8a3	0	1	0	1	Slc8a3		Lpar6	0	1	0	0	Lpar6
				Slc9a1	0	1	0	1	Slc9a1		Lrp11	0	1	0	0	Lrp11
				Smad6	0	1	0	1	Smad6		Lrrc2	0	1	0	0	Lrrc2
				Smarcd3	0	1	0	1	Smarcd3		Lrrc27	0	1	0	0	Lrrc27
				Smo	0	1	0	1	Smo		Lrrc8d	0	1	0	0	Lrrc8d
				Smtn	0	1	0	1	Smtn		Lsr	0	1	0	0	Lsr
				Smug1	0	1	0	1	Smug1		Lyn	0	1	0	0	Lyn
				Snhg18	0	1	0	1	Snhg18		Mapk11	0	1	0	0	Mapk11
				Snx3	0	1	0	1	Snx3		Mapt	0	1	0	0	Mapt
				Sobp	0	1	0	1	Sobp		Megf10	0	1	0	0	Megf10
				Sorcs2	0	1	0	1	Sorcs2		Miat	0	1	0	0	Miat
				Sp7	0	1	0	1	Sp7		Mlkl	0	1	0	0	Mlkl
				Sparc	0	1	0	1	Sparc		Mmrn1	0	1	0	0	Mmrn1
				Srgap3	0	1	0	1	Srgap3		Mogat1	0	1	0	0	Mogat1
				Ssbp3	0	1	0	1	Ssbp3		Ms4a4c	0	1	0	0	Ms4a4c
				Ssc5d	0	1	0	1	Ssc5d		Msi2	0	1	0	0	Msi2
				Sspn	0	1	0	1	Sspn		mt.Co1	0	1	0	0	mt.Co1
				St3gal2	0	1	0	1	St3gal2		mt.Rnr2	0	1	0	0	mt.Rnr2
				St3gal5	0	1	0	1	St3gal5		mt.Tp	0	1	0	0	mt.Tp
				St6galnac6	0	1	0	1	St6galnac6		Myo18b	0	1	0	0	Myo18b
				Sulf2	0	1	0	1	Sulf2		Myzap	0	1	0	0	Myzap
				Surf4	0	1	0	1	Surf4		Naaladl1	0	1	0	0	Naaladl1
				Susd5	0	1	0	1	Susd5		Nap1l5	0	1	0	0	Nap1l5
				Svil	0	1	0	1	Svil		Nckap1l	0	1	0	0	Nckap1l
				Syn1	0	1	0	1	Syn1		Nmb	0	1	0	0	Nmb
				Syndig1l	0	1	0	1	Syndig1l		Nos3	0	1	0	0	Nos3
				Syt6	0	1	0	1	Syt6		Nr6a1	0	1	0	0	Nr6a1
				Sytl2	0	1	0	1	Sytl2		Nrcam	0	1	0	0	Nrcam
				Szrd1	0	1	0	1	Szrd1		Nrxn3	0	1	0	0	Nrxn3
				Tbc1d8b	0	1	0	1	Tbc1d8b		Nt5c1a	0	1	0	0	Nt5c1a
				Tceal3	0	1	0	1	Tceal3		Nudt16	0	1	0	0	Nudt16
				Tcf15	0	1	0	1	Tcf15		Oas3	0	1	0	0	Oas3
				Tenm3	0	1	0	1	Tenm3		Paics	0	1	0	0	Paics
				Tenm4	0	1	0	1	Tenm4		Paqr5	0	1	0	0	Paqr5
				Tgfb1	0	1	0	1	Tgfb1		Parp10	0	1	0	0	Parp10
				Tgfb1i1	0	1	0	1	Tgfb1i1		Pcare	0	1	0	0	Pcare
				Tgfb3	0	1	0	1	Tgfb3		Pde10a	0	1	0	0	Pde10a
				Tle5	0	1	0	1	Tle5		Pde5a	0	1	0	0	Pde5a
				Tmed3	0	1	0	1	Tmed3		Per2	0	1	0	0	Per2
				Tmem119	0	1	0	1	Tmem119		Phf11c	0	1	0	0	Phf11c
				Tmem132e	0	1	0	1	Tmem132e		Pik3r5	0	1	0	0	Pik3r5
				Tmem150a	0	1	0	1	Tmem150a		Piwil4	0	1	0	0	Piwil4
				Tmem39a	0	1	0	1	Tmem39a		Pla1a	0	1	0	0	Pla1a
				Tnc	0	1	0	1	Tnc		Plcb2	0	1	0	0	Plcb2
				Tnfrsf19	0	1	0	1	Tnfrsf19		Plekhh2	0	1	0	0	Plekhh2
				Tnfrsf25	0	1	0	1	Tnfrsf25		Plin4	0	1	0	0	Plin4
				Tnn	0	1	0	1	Tnn		Prok2	0	1	0	0	Prok2
				Tnrc18	0	1	0	1	Tnrc18		Prxl2a	0	1	0	0	Prxl2a
				Tpcn1	0	1	0	1	Tpcn1		Ptk2b	0	1	0	0	Ptk2b
				Tpst1	0	1	0	1	Tpst1		Ptpn6	0	1	0	0	Ptpn6
				Trp53inp2	0	1	0	1	Trp53inp2		Rasd2	0	1	0	0	Rasd2
				Tspan18	0	1	0	1	Tspan18		Rbp3	0	1	0	0	Rbp3
				Tspan7	0	1	0	1	Tspan7		Resp18	0	1	0	0	Resp18
				Tspan9	0	1	0	1	Tspan9		Rian	0	1	0	0	Rian
				Ttc28	0	1	0	1	Ttc28		Rin1	0	1	0	0	Rin1
				Ttyh2	0	1	0	1	Ttyh2		Rnf43	0	1	0	0	Rnf43
				Ttyh3	0	1	0	1	Ttyh3		Rsad2	0	1	0	0	Rsad2
				Tub	0	1	0	1	Tub		Scn3b	0	1	0	0	Scn3b
				Twist1	0	1	0	1	Twist1		Sema3e	0	1	0	0	Sema3e
				Ubtd2	0	1	0	1	Ubtd2		Serpina1b	0	1	0	0	Serpina1b
				Unc5b	0	1	0	1	Unc5b		Serpina3f	0	1	0	0	Serpina3f
				Upf1	0	1	0	1	Upf1		Sez6l	0	1	0	0	Sez6l
				Vamp2	0	1	0	1	Vamp2		Sgf29	0	1	0	0	Sgf29
				Vasn	0	1	0	1	Vasn		Sgms1	0	1	0	0	Sgms1
				Vcan	0	1	0	1	Vcan		Sh2d2a	0	1	0	0	Sh2d2a
				Vdr	0	1	0	1	Vdr		Sh2d6	0	1	0	0	Sh2d6
				Wdtc1	0	1	0	1	Wdtc1		Sigirr	0	1	0	0	Sigirr
				Wfdc1	0	1	0	1	Wfdc1		Siglec1	0	1	0	0	Siglec1
				Wiz	0	1	0	1	Wiz		Sirpb1c	0	1	0	0	Sirpb1c
				Wwtr1	0	1	0	1	Wwtr1		Sla	0	1	0	0	Sla
				X1810055G02Rik	0	1	0	1	X1810055G02Rik		Slc10a6	0	1	0	0	Slc10a6
				X2310022B05Rik	0	1	0	1	X2310022B05Rik		Slc13a4	0	1	0	0	Slc13a4
				X2510039O18Rik	0	1	0	1	X2510039O18Rik		Slc16a12	0	1	0	0	Slc16a12
				X2700081O15Rik	0	1	0	1	X2700081O15Rik		Slc20a1	0	1	0	0	Slc20a1
				X9530068E07Rik	0	1	0	1	X9530068E07Rik		Slc22a3	0	1	0	0	Slc22a3
				Zbed3	0	1	0	1	Zbed3		Slc23a2	0	1	0	0	Slc23a2
				Zbtb7c	0	1	0	1	Zbtb7c		Slc30a10	0	1	0	0	Slc30a10
				Zfp319	0	1	0	1	Zfp319		Slc38a1	0	1	0	0	Slc38a1
				Zfp385a	0	1	0	1	Zfp385a		Slc38a5	0	1	0	0	Slc38a5
				Zfp395	0	1	0	1	Zfp395		Slc43a3	0	1	0	0	Slc43a3
				Zfp503	0	1	0	1	Zfp503		Slc5a5	0	1	0	0	Slc5a5
				Zfp521	0	1	0	1	Zfp521		Slco2b1	0	1	0	0	Slco2b1
				Zfp609	0	1	0	1	Zfp609		Sncg	0	1	0	0	Sncg
				Zfp651	0	1	0	1	Zfp651		Sned1	0	1	0	0	Sned1
				Zfp703	0	1	0	1	Zfp703		Soat1	0	1	0	0	Soat1
				Zfp862.ps	0	1	0	1	Zfp862.ps		Sorbs1	0	1	0	0	Sorbs1
				Zim1	0	1	0	1	Zim1		Sox17	0	1	0	0	Sox17
				Zfp36l1	0	1	1	1	Zfp36l1		Spi1	0	1	0	0	Spi1
				Zfp467	0	1	1	1	Zfp467		Sptlc2	0	1	0	0	Sptlc2
				A2m	1	0	0	1	A2m		Srarp	0	1	0	0	Srarp
				Acad8	1	0	0	1	Acad8		Srrm2	0	1	0	0	Srrm2
				Acox2	1	0	0	1	Acox2		Stmn2	0	1	0	0	Stmn2
				Adamts1	1	0	0	1	Adamts1		Stxbp1	0	1	0	0	Stxbp1
				Ak7	1	0	0	1	Ak7		Stxbp2	0	1	0	0	Stxbp2
				Ak9	1	0	0	1	Ak9		Sult1c1	0	1	0	0	Sult1c1
				Ankrd45	1	0	0	1	Ankrd45		Sult1c2	0	1	0	0	Sult1c2
				Arhgef11	1	0	0	1	Arhgef11		Syn2	0	1	0	0	Syn2
				Arhgef18	1	0	0	1	Arhgef18		Syt5	0	1	0	0	Syt5
				Arl6ip1	1	0	0	1	Arl6ip1		Syt7	0	1	0	0	Syt7
				Atp1a1	1	0	0	1	Atp1a1		Sytl4	0	1	0	0	Sytl4
				Atp2b2	1	0	0	1	Atp2b2		Tac4	0	1	0	0	Tac4
				Atp2b3	1	0	0	1	Atp2b3		Tbx1	0	1	0	0	Tbx1
				Baiap2l1	1	0	0	1	Baiap2l1		Tedc2	0	1	0	0	Tedc2
				Best3	1	0	0	1	Best3		Tgtp2	0	1	0	0	Tgtp2
				Brinp1	1	0	0	1	Brinp1		Tlx2	0	1	0	0	Tlx2
				Cab39l	1	0	0	1	Cab39l		Tmem243	0	1	0	0	Tmem243
				Cachd1	1	0	0	1	Cachd1		Tmem37	0	1	0	0	Tmem37
				Capsl	1	0	0	1	Capsl		Tmem63c	0	1	0	0	Tmem63c
				Car12	1	0	0	1	Car12		Tnfsf8	0	1	0	0	Tnfsf8
				Caskin2	1	0	0	1	Caskin2		Tnr	0	1	0	0	Tnr
				Catip	1	0	0	1	Catip		Tspan10	0	1	0	0	Tspan10
				Cdc42bpb	1	0	0	1	Cdc42bpb		Tspoap1	0	1	0	0	Tspoap1
				Cdr2	1	0	0	1	Cdr2		Ttyh1	0	1	0	0	Ttyh1
				Cfap206	1	0	0	1	Cfap206		Tubb2b	0	1	0	0	Tubb2b
				Cfap52	1	0	0	1	Cfap52		Ubd	0	1	0	0	Ubd
				Cfap65	1	0	0	1	Cfap65		Uhrf1bp1l	0	1	0	0	Uhrf1bp1l
				Cfap69	1	0	0	1	Cfap69		Uimc1	0	1	0	0	Uimc1
				Cgn	1	0	0	1	Cgn		Usp54	0	1	0	0	Usp54
				Cgnl1	1	0	0	1	Cgnl1		Vmp1	0	1	0	0	Vmp1
				Cidea	1	0	0	1	Cidea		Vrk1	0	1	0	0	Vrk1
				Cldn1	1	0	0	1	Cldn1		Wnt9b	0	1	0	0	Wnt9b
				Cldn2	1	0	0	1	Cldn2		X2210039B01Rik	0	1	0	0	X2210039B01Rik
				Clic6	1	0	0	1	Clic6		X2900052L18Rik	0	1	0	0	X2900052L18Rik
				Cnnm2	1	0	0	1	Cnnm2		Xaf1	0	1	0	0	Xaf1
				Col9a3	1	0	0	1	Col9a3		Zc3h12d	0	1	0	0	Zc3h12d
				Crb2	1	0	0	1	Crb2		Zfp217	0	1	0	0	Zfp217
				Crhr2	1	0	0	1	Crhr2		Zfp385b	0	1	0	0	Zfp385b
				Cux2	1	0	0	1	Cux2		Zfp941	0	1	0	0	Zfp941
				Dcaf12l1	1	0	0	1	Dcaf12l1		Zfyve28	0	1	0	0	Zfyve28
				Ddr1	1	0	0	1	Ddr1		Zmynd15	0	1	0	0	Zmynd15
				Defb11	1	0	0	1	Defb11		Zwint	0	1	0	0	Zwint
				Dlgap1	1	0	0	1	Dlgap1		Neat1	0	1	1	0	Neat1
				Dnah6	1	0	0	1	Dnah6		Adam23	1	0	0	0	Adam23
				Dnali1	1	0	0	1	Dnali1		Cd302	1	0	0	0	Cd302
				Dock6	1	0	0	1	Dock6		Cd5l	1	0	0	0	Cd5l
				Drc7	1	0	0	1	Drc7		Cited4	1	0	0	0	Cited4
				Dusp18	1	0	0	1	Dusp18		Crtap	1	0	0	0	Crtap
				Elfn1	1	0	0	1	Elfn1		Dact3	1	0	0	0	Dact3
				Elovl7	1	0	0	1	Elovl7		Eid1	1	0	0	0	Eid1
				Enpp2	1	0	0	1	Enpp2		Foxd1	1	0	0	0	Foxd1
				Epn3	1	0	0	1	Epn3		Foxp2	1	0	0	0	Foxp2
				Eps8l2	1	0	0	1	Eps8l2		Gas1	1	0	0	0	Gas1
				Ezr	1	0	0	1	Ezr		Gclm	1	0	0	0	Gclm
				F5	1	0	0	1	F5		Gnas	1	0	0	0	Gnas
				Fads2	1	0	0	1	Fads2		Hmgn2	1	0	0	0	Hmgn2
				Fads3	1	0	0	1	Fads3		Htra1	1	0	0	0	Htra1
				Fam186a	1	0	0	1	Fam186a		Insm1	1	0	0	0	Insm1
				Fam81a	1	0	0	1	Fam81a		Itm2a	1	0	0	0	Itm2a
				Fhad1	1	0	0	1	Fhad1		Marcks	1	0	0	0	Marcks
				Folr1	1	0	0	1	Folr1		Micu2	1	0	0	0	Micu2
				Foxj1	1	0	0	1	Foxj1		Nenf	1	0	0	0	Nenf
				Frem1	1	0	0	1	Frem1		P4ha3	1	0	0	0	P4ha3
				Gde1	1	0	0	1	Gde1		Pdlim2	1	0	0	0	Pdlim2
				Gdf7	1	0	0	1	Gdf7		Prrx2	1	0	0	0	Prrx2
				Gm19500	1	0	0	1	Gm19500		Ptx3	1	0	0	0	Ptx3
				Gm26684	1	0	0	1	Gm26684		Rnf187	1	0	0	0	Rnf187
				Gm28729	1	0	0	1	Gm28729		Sap30l	1	0	0	0	Sap30l
				Gm44250	1	0	0	1	Gm44250		Snai2	1	0	0	0	Snai2
				Gmnc	1	0	0	1	Gmnc		Taf10	1	0	0	0	Taf10
				Gpr137	1	0	0	1	Gpr137		Tmem160	1	0	0	0	Tmem160
				Grb14	1	0	0	1	Grb14		Tmem233	1	0	0	0	Tmem233
				Hemk1	1	0	0	1	Hemk1		Tnmd	1	0	0	0	Tnmd
				Hyou1	1	0	0	1	Hyou1
				Igfn1	1	0	0	1	Igfn1
				Igsf1	1	0	0	1	Igsf1
				Iqub	1	0	0	1	Iqub
				Itpk1	1	0	0	1	Itpk1
				Itpripl1	1	0	0	1	Itpripl1
				Jakmip2	1	0	0	1	Jakmip2
				Kcnh1	1	0	0	1	Kcnh1
				Kcnh2	1	0	0	1	Kcnh2
				Kcnj13	1	0	0	1	Kcnj13
				Kcnk1	1	0	0	1	Kcnk1
				Kdm5c	1	0	0	1	Kdm5c
				Kif1a	1	0	0	1	Kif1a
				Kif9	1	0	0	1	Kif9
				Kl	1	0	0	1	Kl
				Klhdc7a	1	0	0	1	Klhdc7a
				Kmt2d	1	0	0	1	Kmt2d
				Lama5	1	0	0	1	Lama5
				Lrrc23	1	0	0	1	Lrrc23
				Maats1	1	0	0	1	Maats1
				Mccc1	1	0	0	1	Mccc1
				Mfrp	1	0	0	1	Mfrp
				Mrap2	1	0	0	1	Mrap2
				Msx1	1	0	0	1	Msx1
				Mt3	1	0	0	1	Mt3
				Mycbpap	1	0	0	1	Mycbpap
				Myh14	1	0	0	1	Myh14
				Myh7	1	0	0	1	Myh7
				Myo5b	1	0	0	1	Myo5b
				Myo7a	1	0	0	1	Myo7a
				Nav3	1	0	0	1	Nav3
				Nek5	1	0	0	1	Nek5
				Npr1	1	0	0	1	Npr1
				Nsg2	1	0	0	1	Nsg2
				Nwd1	1	0	0	1	Nwd1
				Oca2	1	0	0	1	Oca2
				Ogdh	1	0	0	1	Ogdh
				Orai2	1	0	0	1	Orai2
				Pcolce2	1	0	0	1	Pcolce2
				Pcsk2	1	0	0	1	Pcsk2
				Phyhip	1	0	0	1	Phyhip
				Piezo1	1	0	0	1	Piezo1
				Pip5k1b	1	0	0	1	Pip5k1b
				Pla2g5	1	0	0	1	Pla2g5
				Plekha6	1	0	0	1	Plekha6
				Plppr4	1	0	0	1	Plppr4
				Pomgnt1	1	0	0	1	Pomgnt1
				Ppm1f	1	0	0	1	Ppm1f
				Ppp2r2c	1	0	0	1	Ppp2r2c
				Prdm16	1	0	0	1	Prdm16
				Prdm16os	1	0	0	1	Prdm16os
				Psd2	1	0	0	1	Psd2
				Rab3ip	1	0	0	1	Rab3ip
				Rbm47	1	0	0	1	Rbm47
				Rd3	1	0	0	1	Rd3
				Rdh5	1	0	0	1	Rdh5
				Rfx2	1	0	0	1	Rfx2
				Rilp	1	0	0	1	Rilp
				Rsph1	1	0	0	1	Rsph1
				Rsph4a	1	0	0	1	Rsph4a
				Scube3	1	0	0	1	Scube3
				Sema3b	1	0	0	1	Sema3b
				Serpinb1b	1	0	0	1	Serpinb1b
				Sh3d19	1	0	0	1	Sh3d19
				Shank2	1	0	0	1	Shank2
				Sipa1l3	1	0	0	1	Sipa1l3
				Six3	1	0	0	1	Six3
				Six3os1	1	0	0	1	Six3os1
				Slc12a4	1	0	0	1	Slc12a4
				Slc16a2	1	0	0	1	Slc16a2
				Slc16a8	1	0	0	1	Slc16a8
				Slc22a17	1	0	0	1	Slc22a17
				Slc24a5	1	0	0	1	Slc24a5
				Slc25a39	1	0	0	1	Slc25a39
				Slc27a1	1	0	0	1	Slc27a1
				Slc29a4	1	0	0	1	Slc29a4
				Slc31a1	1	0	0	1	Slc31a1
				Slc39a12	1	0	0	1	Slc39a12
				Slc4a2	1	0	0	1	Slc4a2
				Slc4a5	1	0	0	1	Slc4a5
				Slc7a10	1	0	0	1	Slc7a10
				Slco1c1	1	0	0	1	Slco1c1
				Sntb1	1	0	0	1	Sntb1
				Sod3	1	0	0	1	Sod3
				Sowahc	1	0	0	1	Sowahc
				Spag6l	1	0	0	1	Spag6l
				Spint2	1	0	0	1	Spint2
				Stard13	1	0	0	1	Stard13
				Steap1	1	0	0	1	Steap1
				Steap2	1	0	0	1	Steap2
				Stk32a	1	0	0	1	Stk32a
				Ston2	1	0	0	1	Ston2
				Sulf1	1	0	0	1	Sulf1
				Syngap1	1	0	0	1	Syngap1
				Syt17	1	0	0	1	Syt17
				Tbc1d2	1	0	0	1	Tbc1d2
				Tbc1d9	1	0	0	1	Tbc1d9
				Tekt1	1	0	0	1	Tekt1
				Tinagl1	1	0	0	1	Tinagl1
				Tjp3	1	0	0	1	Tjp3
				Tmem108	1	0	0	1	Tmem108
				Tmem184a	1	0	0	1	Tmem184a
				Tmem237	1	0	0	1	Tmem237
				Tmem72	1	0	0	1	Tmem72
				Tmprss11a	1	0	0	1	Tmprss11a
				Tns4	1	0	0	1	Tns4
				Trp73	1	0	0	1	Trp73
				Trpv4	1	0	0	1	Trpv4
				Tspan33	1	0	0	1	Tspan33
				Ttc21a	1	0	0	1	Ttc21a
				Ttc9	1	0	0	1	Ttc9
				Tyro3	1	0	0	1	Tyro3
				Ubap2	1	0	0	1	Ubap2
				Vat1l	1	0	0	1	Vat1l
				Vwa3a	1	0	0	1	Vwa3a
				Wwc1	1	0	0	1	Wwc1
				X2410004P03Rik	1	0	0	1	X2410004P03Rik
				Zfp579	1	0	0	1	Zfp579
				Zmynd10	1	0	0	1	Zmynd10
				Gckr	1	1	0	1	Gckr
				Gm26917	1	1	0	1	Gm26917
				Lamb1	1	1	0	1	Lamb1
				Ptprf	1	1	0	1	Ptprf
				Tmem132a	1	1	0	1	Tmem132a
				Whrn	1	1	0	1	Whrn
				Dcc	0	0	1	0	Dcc
				Egfl7	0	0	1	0	Egfl7
				Ighg2b	0	0	1	0	Ighg2b
				Igkv3.4	0	0	1	0	Igkv3.4
				Jun	0	0	1	0	Jun
				Abhd17a	0	1	0	0	Abhd17a
				Actg2	0	1	0	0	Actg2
				Acy1	0	1	0	0	Acy1
				Adam12	0	1	0	0	Adam12
				Adamts12	0	1	0	0	Adamts12
				Ado	0	1	0	0	Ado
				Ak1	0	1	0	0	Ak1
				Arhgef10l	0	1	0	0	Arhgef10l
				Asap3	0	1	0	0	Asap3
				Bcl6b	0	1	0	0	Bcl6b
				Bglap	0	1	0	0	Bglap
				Bloc1s4	0	1	0	0	Bloc1s4
				Bok	0	1	0	0	Bok
				Bsx	0	1	0	0	Bsx
				Cacna1h	0	1	0	0	Cacna1h
				Car3	0	1	0	0	Car3
				Cbr2	0	1	0	0	Cbr2
				Cckbr	0	1	0	0	Cckbr
				Ccl24	0	1	0	0	Ccl24
				Cd248	0	1	0	0	Cd248
				Cdh11	0	1	0	0	Cdh11
				Cdon	0	1	0	0	Cdon
				Cemip2	0	1	0	0	Cemip2
				Cfp	0	1	0	0	Cfp
				Cgref1	0	1	0	0	Cgref1
				Chmp2b	0	1	0	0	Chmp2b
				Chn2	0	1	0	0	Chn2
				Chrdl1	0	1	0	0	Chrdl1
				Chst14	0	1	0	0	Chst14
				Chsy1	0	1	0	0	Chsy1
				Cited4	0	1	0	0	Cited4
				Cmtm3	0	1	0	0	Cmtm3
				Cnmd	0	1	0	0	Cnmd
				Cnn2	0	1	0	0	Cnn2
				Col11a2	0	1	0	0	Col11a2
				Col17a1	0	1	0	0	Col17a1
				Col22a1	0	1	0	0	Col22a1
				Copz2	0	1	0	0	Copz2
				Cpxm2	0	1	0	0	Cpxm2
				Crkl	0	1	0	0	Crkl
				Crtap	0	1	0	0	Crtap
				Crym	0	1	0	0	Crym
				Ctf1	0	1	0	0	Ctf1
				Cxcl3	0	1	0	0	Cxcl3
				D030045P18Rik	0	1	0	0	D030045P18Rik
				Dcbld1	0	1	0	0	Dcbld1
				Dcn	0	1	0	0	Dcn
				Ddit4l	0	1	0	0	Ddit4l
				Desi1	0	1	0	0	Desi1
				Dgcr2	0	1	0	0	Dgcr2
				Dll4	0	1	0	0	Dll4
				Dnase1l2	0	1	0	0	Dnase1l2
				Dok5	0	1	0	0	Dok5
				Dpt	0	1	0	0	Dpt
				Dsc3	0	1	0	0	Dsc3
				Dse	0	1	0	0	Dse
				Duox1	0	1	0	0	Duox1
				Dusp11	0	1	0	0	Dusp11
				Dusp7	0	1	0	0	Dusp7
				Ebf4	0	1	0	0	Ebf4
				Ecm2	0	1	0	0	Ecm2
				Egln1	0	1	0	0	Egln1
				En2	0	1	0	0	En2
				Enpep	0	1	0	0	Enpep
				Epha7	0	1	0	0	Epha7
				Epyc	0	1	0	0	Epyc
				Ets2	0	1	0	0	Ets2
				Evc	0	1	0	0	Evc
				Fam131a	0	1	0	0	Fam131a
				Fat1	0	1	0	0	Fat1
				Fbxl16	0	1	0	0	Fbxl16
				Fcgrt	0	1	0	0	Fcgrt
				Fgfr2	0	1	0	0	Fgfr2
				Fgfrl1	0	1	0	0	Fgfrl1
				Fkbp7	0	1	0	0	Fkbp7
				Fkbp9	0	1	0	0	Fkbp9
				Foxd1	0	1	0	0	Foxd1
				Foxp2	0	1	0	0	Foxp2
				Frmd6	0	1	0	0	Frmd6
				Fut11	0	1	0	0	Fut11
				Fut8	0	1	0	0	Fut8
				Fzd2	0	1	0	0	Fzd2
				Fzd8	0	1	0	0	Fzd8
				G0s2	0	1	0	0	G0s2
				Gap43	0	1	0	0	Gap43
				Gas1	0	1	0	0	Gas1
				Gfra2	0	1	0	0	Gfra2
				Gm16574	0	1	0	0	Gm16574
				Gm42517	0	1	0	0	Gm42517
				Gm43610	0	1	0	0	Gm43610
				Gm43618	0	1	0	0	Gm43618
				Gm973	0	1	0	0	Gm973
				Gnas	0	1	0	0	Gnas
				Gng8	0	1	0	0	Gng8
				Gpc3	0	1	0	0	Gpc3
				Gpsm1	0	1	0	0	Gpsm1
				Gpt	0	1	0	0	Gpt
				Grik5	0	1	0	0	Grik5
				Grin2c	0	1	0	0	Grin2c
				Grin2d	0	1	0	0	Grin2d
				Grip2	0	1	0	0	Grip2
				Grk1	0	1	0	0	Grk1
				Grm6	0	1	0	0	Grm6
				H1f0	0	1	0	0	H1f0
				H1f10	0	1	0	0	H1f10
				H1f2	0	1	0	0	H1f2
				Hdac2	0	1	0	0	Hdac2
				Hes1	0	1	0	0	Hes1
				Hmcn2	0	1	0	0	Hmcn2
				Hmgcs2	0	1	0	0	Hmgcs2
				Hnrnpa0	0	1	0	0	Hnrnpa0
				Hs3st2	0	1	0	0	Hs3st2
				Hspa1b	0	1	0	0	Hspa1b
				Id2	0	1	0	0	Id2
				Ier5l	0	1	0	0	Ier5l
				Ifitm10	0	1	0	0	Ifitm10
				Igdcc4	0	1	0	0	Igdcc4
				Ighv7.1	0	1	0	0	Ighv7.1
				Igsf21	0	1	0	0	Igsf21
				Ikzf4	0	1	0	0	Ikzf4
				Il17d	0	1	0	0	Il17d
				Il33	0	1	0	0	Il33
				Impdh1	0	1	0	0	Impdh1
				Irf2bp1	0	1	0	0	Irf2bp1
				Irf2bp2	0	1	0	0	Irf2bp2
				Jph2	0	1	0	0	Jph2
				Kcna4	0	1	0	0	Kcna4
				Kcnk2	0	1	0	0	Kcnk2
				Kcnk5	0	1	0	0	Kcnk5
				Kcp	0	1	0	0	Kcp
				Kdelr2	0	1	0	0	Kdelr2
				Kdm5b	0	1	0	0	Kdm5b
				Klf2	0	1	0	0	Klf2
				Klhl42	0	1	0	0	Klhl42
				Lactbl1	0	1	0	0	Lactbl1
				Lars2	0	1	0	0	Lars2
				Ldlrad3	0	1	0	0	Ldlrad3
				Lix1l	0	1	0	0	Lix1l
				Lpl	0	1	0	0	Lpl
				Lpp	0	1	0	0	Lpp
				Lrfn1	0	1	0	0	Lrfn1
				Lrfn3	0	1	0	0	Lrfn3
				Lrit3	0	1	0	0	Lrit3
				Lrp12	0	1	0	0	Lrp12
				Lrp6	0	1	0	0	Lrp6
				Lrrc4	0	1	0	0	Lrrc4
				Ltbp2	0	1	0	0	Ltbp2
				Maf	0	1	0	0	Maf
				Maged2	0	1	0	0	Maged2
				Mapk7	0	1	0	0	Mapk7
				Marcks	0	1	0	0	Marcks
				Mdfi	0	1	0	0	Mdfi
				Med26	0	1	0	0	Med26
				Mex3d	0	1	0	0	Mex3d
				Mgll	0	1	0	0	Mgll
				Mical3	0	1	0	0	Mical3
				Mme	0	1	0	0	Mme
				Mmp23	0	1	0	0	Mmp23
				Mn1	0	1	0	0	Mn1
				Msx2	0	1	0	0	Msx2
				Myh1	0	1	0	0	Myh1
				N4bp2	0	1	0	0	N4bp2
				Nab2	0	1	0	0	Nab2
				Nectin1	0	1	0	0	Nectin1
				Nfia	0	1	0	0	Nfia
				Nptx2	0	1	0	0	Nptx2
				Nr4a2	0	1	0	0	Nr4a2
				Nrarp	0	1	0	0	Nrarp
				Nrtn	0	1	0	0	Nrtn
				Nts	0	1	0	0	Nts
				Oaf	0	1	0	0	Oaf
				Ost4	0	1	0	0	Ost4
				P2ry10b	0	1	0	0	P2ry10b
				P4ha3	0	1	0	0	P4ha3
				Pde4dip	0	1	0	0	Pde4dip
				Pdgfrl	0	1	0	0	Pdgfrl
				Pdlim2	0	1	0	0	Pdlim2
				Pdzd4	0	1	0	0	Pdzd4
				Penk	0	1	0	0	Penk
				Pgc	0	1	0	0	Pgc
				Pheta2	0	1	0	0	Pheta2
				Pid1	0	1	0	0	Pid1
				Pkdcc	0	1	0	0	Pkdcc
				Plekhh3	0	1	0	0	Plekhh3
				Podxl2	0	1	0	0	Podxl2
				Pou3f3	0	1	0	0	Pou3f3
				Prmt2	0	1	0	0	Prmt2
				Prr16	0	1	0	0	Prr16
				Prr5l	0	1	0	0	Prr5l
				Prrx1	0	1	0	0	Prrx1
				Prss23	0	1	0	0	Prss23
				Ptov1	0	1	0	0	Ptov1
				Ptprd	0	1	0	0	Ptprd
				Ptx3	0	1	0	0	Ptx3
				Pwwp3b	0	1	0	0	Pwwp3b
				Rab3il1	0	1	0	0	Rab3il1
				Rassf3	0	1	0	0	Rassf3
				Rbm15b	0	1	0	0	Rbm15b
				Reep3	0	1	0	0	Reep3
				Reep6	0	1	0	0	Reep6
				Retnla	0	1	0	0	Retnla
				Rftn2	0	1	0	0	Rftn2
				Rhobtb3	0	1	0	0	Rhobtb3
				Rnf11	0	1	0	0	Rnf11
				Rras2	0	1	0	0	Rras2
				Samd14	0	1	0	0	Samd14
				Samd5	0	1	0	0	Samd5
				Sap30l	0	1	0	0	Sap30l
				Satb2	0	1	0	0	Satb2
				Scml2	0	1	0	0	Scml2
				Scx	0	1	0	0	Scx
				Sem1	0	1	0	0	Sem1
				2022-09-04	0	1	0	0	2022-09-04
				Sertad3	0	1	0	0	Sertad3
				Sesn3	0	1	0	0	Sesn3
				Sgce	0	1	0	0	Sgce
				Shb	0	1	0	0	Shb
				Siae	0	1	0	0	Siae
				Siah2	0	1	0	0	Siah2
				Slc22a5	0	1	0	0	Slc22a5
				Slc25a25	0	1	0	0	Slc25a25
				Slc35e3	0	1	0	0	Slc35e3
				Slc39a6	0	1	0	0	Slc39a6
				Slc9a9	0	1	0	0	Slc9a9
				Slitrk6	0	1	0	0	Slitrk6
				Smarca1	0	1	0	0	Smarca1
				Smco4	0	1	0	0	Smco4
				Snai1	0	1	0	0	Snai1
				Snai2	0	1	0	0	Snai2
				Sncaip	0	1	0	0	Sncaip
				Snx24	0	1	0	0	Snx24
				Snx7	0	1	0	0	Snx7
				Socs1	0	1	0	0	Socs1
				Sord	0	1	0	0	Sord
				Spats2l	0	1	0	0	Spats2l
				Spon2	0	1	0	0	Spon2
				Sptssa	0	1	0	0	Sptssa
				Srf	0	1	0	0	Srf
				Srpx	0	1	0	0	Srpx
				Srsf9	0	1	0	0	Srsf9
				Stat5b	0	1	0	0	Stat5b
				Stmn1	0	1	0	0	Stmn1
				Stt3a	0	1	0	0	Stt3a
				Sybu	0	1	0	0	Sybu
				Tada3	0	1	0	0	Tada3
				Tcaf1	0	1	0	0	Tcaf1
				Tceal9	0	1	0	0	Tceal9
				Tcf20	0	1	0	0	Tcf20
				Tesk1	0	1	0	0	Tesk1
				Thbs2	0	1	0	0	Thbs2
				Thra	0	1	0	0	Thra
				Tlcd2	0	1	0	0	Tlcd2
				Tmem200b	0	1	0	0	Tmem200b
				Tmem250.ps	0	1	0	0	Tmem250.ps
				Tmem263	0	1	0	0	Tmem263
				Tmx1	0	1	0	0	Tmx1
				Tnfrsf10b	0	1	0	0	Tnfrsf10b
				Tnmd	0	1	0	0	Tnmd
				Tpm1	0	1	0	0	Tpm1
				Tpm2	0	1	0	0	Tpm2
				Traf4	0	1	0	0	Traf4
				Traf5	0	1	0	0	Traf5
				Trim28	0	1	0	0	Trim28
				Trim46	0	1	0	0	Trim46
				Trp53i13	0	1	0	0	Trp53i13
				Tsc22d2	0	1	0	0	Tsc22d2
				Twsg1	0	1	0	0	Twsg1
				Ulk2	0	1	0	0	Ulk2
				Vstm4	0	1	0	0	Vstm4
				Zfhx3	0	1	0	0	Zfhx3
				Zfp111	0	1	0	0	Zfp111
				Zfp354c	0	1	0	0	Zfp354c
				Zfp623	0	1	0	0	Zfp623
				Zfyve16	0	1	0	0	Zfyve16
				Zmym1	0	1	0	0	Zmym1
				Zyx	0	1	0	0	Zyx
				Amotl2	0	1	1	0	Amotl2
				Dnajb1	0	1	1	0	Dnajb1
				Epha2	0	1	1	0	Epha2
				Hlx	0	1	1	0	Hlx
[truncated: 120 more rows]
