# Supplementary material for: The meningeal transcriptional response to traumatic brain injury and aging
Source: eLife. 2023 Jan 3;12:e81154. doi: 10.7554/eLife.81154 (PMC9810333; doi:10.7554/eLife.81154)
Supplement: Figure 6—figure supplement 1—source data 1. [file elife-81154-fig6-figsupp1-data1.xlsx]

## Sheet: Sheet1
Total Cell Number			CD19+ Cell Number			B220+ Cell Number			CD19+B220+ Cell Number
Young	Aged		Young	Aged		Young	Aged		Young	Aged
232000	110000		1650	3250		1900	3350		1740	3250
427000	31800		895	647		1080	716		946	648
373000	45200		1510	551		1810	636		1620	558
239000	42900		959	1160		1360	1360		1100	1190
415000	66400		770	2480		925	2540		794	2440
105000	122000		499	465		672	567		517	468
168000			545			888			654
			CD19+ Freq of CD45+			B220+ Freq of CD45+			CD19+B220+ Freq of CD45+
			Young	Aged		Young	Aged		Young	Aged
			40.1	36.8		46.3	37.8		42.4	36.7
			28.9	43.5		34.9	46.4		30.5	43.8
			43.9	26		52.6	28.8		47.1	26.1
			26.9	14.5		38.2	16.8		30.9	14.7
			32.2	22.5		38.7	26.4		33.2	23.2
			22.7	37.8		30.6	38.7		23.6	37.2
			25	14.9		40.7	18.1		30	15
