# Supplementary material for: The meningeal transcriptional response to traumatic brain injury and aging
Source: eLife. 2023 Jan 3;12:e81154. doi: 10.7554/eLife.81154 (PMC9810333; doi:10.7554/eLife.81154)
Supplement: Figure 6—source data 1. [file elife-81154-fig6-data1.xlsx]

## Sheet: Sheet1
	baseMean	log2FoldChange	lfcSE	stat	pvalue	padj	response
Itgb2l	56.2275	1.38224	0.518111	2.66784	0.00763395	0.0872504	Age Activated
Itgb2	823.173	0.65992	0.181366	3.63861	0.000274108	0.00711935	Age Activated
Alox12	157.711	0.579284	0.190276	3.04445	0.00233109	0.0367496	Age Activated
Mx1	212.441	1.0644	0.199276	5.34134	9.22645e-08	8.88349e-06	Age Activated
Lck	80.4917	0.939956	0.261792	3.59046	0.000330093	0.00830197	Age Activated
Hk2	354.237	0.682273	0.192293	3.54808	0.00038805	0.00931711	Age Activated
Cd52	375.436	0.572384	0.14623	3.91427	9.06791e-05	0.00296519	Age Activated
Icosl	338.927	0.486325	0.139086	3.49658	0.000471267	0.0109698	Age Activated
Il12rb1	26.3359	1.31388	0.491619	2.67255	0.00752766	0.0864454	Age Activated
Slc5a5	181.354	0.597562	0.183658	3.25366	0.00113928	0.0212725	Age Activated
Car4	56.3804	1.03542	0.289021	3.58253	0.000340284	0.00846889	Age Activated
Lsr	174.147	0.686794	0.218468	3.14368	0.0016684	0.0286802	Age Activated
Itgb7	363.784	0.663336	0.176722	3.75355	0.000174345	0.00496652	Age Activated
Acap1	148.202	0.722716	0.212626	3.399	0.000676326	0.0143102	Age Activated
Slc1a5	1394.48	0.55588	0.209355	2.65521	0.00792599	0.0894619	Age Activated
Vwf	13631	0.466436	0.174971	2.66579	0.0076808	0.0876282	Age Activated
Grik3	354.349	0.487386	0.183091	2.66199	0.00776813	0.0882641	Age Activated
Cd3g	42.5889	1.37856	0.349485	3.94454	7.99546e-05	0.00268355	Age Activated
Spi1	572.046	0.432516	0.151819	2.84889	0.00438714	0.0593078	Age Activated
Napsa	108.833	0.625527	0.211234	2.9613	0.00306342	0.0450973	Age Activated
Dennd1c	278.953	0.429268	0.135954	3.15744	0.00159159	0.0276843	Age Activated
Lcp2	272.702	0.617149	0.186155	3.31525	0.000915626	0.0179953	Age Activated
Plin4	164.782	0.756431	0.243934	3.10096	0.00192891	0.0318379	Age Activated
Pla1a	69.6603	0.846816	0.308819	2.74211	0.00610452	0.0742672	Age Activated
Il17ra	846.331	0.558971	0.172978	3.23147	0.00123156	0.0226258	Age Activated
Slc2a3	263.457	0.614838	0.210998	2.91396	0.00356877	0.0507345	Age Activated
Cd79a	132.864	0.736946	0.198148	3.71918	0.000199873	0.00553835	Age Activated
St8sia6	83.6594	1.31535	0.328692	4.00176	6.28731e-05	0.00221146	Age Activated
Cyp4f18	95.4146	0.873216	0.249298	3.5027	0.000460571	0.0107866	Age Activated
Prodh	861.761	0.446024	0.114775	3.88607	0.000101879	0.00325332	Age Activated
Ier3	508.94	0.720898	0.187008	3.85491	0.00011577	0.00355975	Age Activated
Cp	4587.39	0.240081	0.0859902	2.79196	0.00523902	0.0667625	Age Activated
Il7r	77.1406	1.13076	0.268492	4.21153	2.53644e-05	0.00103543	Age Activated
Cacna1b	28.9085	1.41124	0.414227	3.40693	0.000656988	0.0140099	Age Activated
Ptpn6	623.33	0.402058	0.115035	3.49509	0.000473908	0.0110044	Age Activated
Cd33	439.106	0.430844	0.120302	3.58134	0.000341833	0.00848406	Age Activated
Nkg7	45.4239	0.845762	0.29939	2.82495	0.00472882	0.0626431	Age Activated
Stxbp2	684.965	0.440328	0.125956	3.49588	0.000472508	0.0109852	Age Activated
Ly9	124.208	0.619976	0.184591	3.35864	0.000783264	0.0159702	Age Activated
Pgf	444.952	0.578674	0.168003	3.44443	0.000572258	0.0125831	Age Activated
Bcan	183.367	0.990417	0.25601	3.86866	0.000109433	0.00342006	Age Activated
Syt5	29.2538	1.14982	0.407302	2.82303	0.00475728	0.0628501	Age Activated
Chd5	337.175	0.496011	0.14437	3.43569	0.000591053	0.0128628	Age Activated
Klf5	285.886	0.537945	0.197711	2.72086	0.00651129	0.0778252	Age Activated
Fcer1a	64.778	1.04139	0.281211	3.70323	0.000212874	0.00583918	Age Activated
Slc1a3	333.987	0.620943	0.133306	4.65801	3.19281e-06	0.000183229	Age Activated
Pan2	1022.76	0.244659	0.0913635	2.67787	0.00740929	0.0858666	Age Activated
Ampd3	806.627	0.595019	0.214184	2.77807	0.00546832	0.0684491	Age Activated
Pdc	28.2653	2.27596	0.494672	4.60096	4.20558e-06	0.000228832	Age Activated
Eps8l1	164.925	0.729216	0.189451	3.84909	0.000118555	0.00362202	Age Activated
Hap1	2431.63	0.301222	0.104027	2.89562	0.00378414	0.0532012	Age Activated
Atp1a2	8800.6	1.13587	0.109124	10.409	2.25472e-25	4.2984e-22	Age Activated
Crlf1	48.1091	0.893103	0.326733	2.73344	0.0062677	0.0756728	Age Activated
Pou2f2	251.899	0.472635	0.158123	2.98903	0.00279862	0.041961	Age Activated
Mgst1	564.208	0.5636	0.192506	2.92771	0.00341471	0.049242	Age Activated
Derl3	57.9612	1.22103	0.279979	4.36113	1.29391e-05	0.000582115	Age Activated
Tbx1	68.3435	0.76739	0.280897	2.73193	0.00629654	0.075781	Age Activated
Ccl8	547.015	1.23213	0.173595	7.09772	1.26829e-12	4.13781e-10	Age Activated
Prr29	72.6752	1.08826	0.282582	3.85111	0.000117583	0.00360385	Age Activated
Fam163b	64.5177	1.03216	0.281686	3.66423	0.000248084	0.00659621	Age Activated
Trpm2	122.71	0.732667	0.228222	3.21033	0.00132584	0.0238603	Age Activated
Mpo	178.49	2.03126	0.588805	3.4498	0.000561002	0.0123928	Age Activated
Slc16a12	123.725	0.703629	0.256787	2.74013	0.00614151	0.0745269	Age Activated
Syn2	267.861	0.376671	0.136948	2.75047	0.00595102	0.0730994	Age Activated
Apobec3	711.291	0.404876	0.141216	2.86707	0.00414297	0.0566582	Age Activated
Adssl1	318.566	0.754972	0.166042	4.54687	5.445e-06	0.000284393	Age Activated
Vipr2	356.284	0.754153	0.190954	3.94939	7.83511e-05	0.00264838	Age Activated
Sptbn4	269.94	1.0901	0.159277	6.84402	7.70018e-12	2.12748e-09	Age Activated
Mogat1	241.777	0.63724	0.209846	3.03671	0.00239175	0.0375279	Age Activated
Mlkl	99.8696	0.841696	0.243178	3.46124	0.000537694	0.0120171	Age Activated
Ceacam16	69.6195	0.970616	0.252247	3.84787	0.000119148	0.00362782	Age Activated
Ptgds	13916.3	1.0099	0.132817	7.60374	2.87703e-14	1.52355e-11	Age Activated
Cybb	910.661	0.548171	0.115993	4.72589	2.29114e-06	0.000136922	Age Activated
Tnr	26.067	1.24935	0.440991	2.83306	0.00461047	0.0615504	Age Activated
Fcgr1	373.247	0.472856	0.1228	3.85063	0.000117815	0.00360517	Age Activated
Ncf1	398.988	0.512029	0.177785	2.88005	0.00397618	0.0551287	Age Activated
Lrrc27	130.365	0.643083	0.203066	3.16688	0.00154086	0.027024	Age Activated
H2.M3	373.342	0.45361	0.126118	3.59672	0.000322249	0.00815015	Age Activated
Tubb1	33.5361	1.81412	0.59579	3.0449	0.00232759	0.0367327	Age Activated
Cd274	169.569	0.790496	0.247707	3.19125	0.00141659	0.0252146	Age Activated
Aldoc	431.149	0.671599	0.131197	5.11903	3.07117e-07	2.49144e-05	Age Activated
Dhx58	241.194	0.529848	0.137392	3.85647	0.000115039	0.00354734	Age Activated
Cyth4	1360.5	0.289681	0.089223	3.24671	0.00116749	0.0216508	Age Activated
Cyb5r3	3956.25	0.281625	0.107618	2.61691	0.00887299	0.0967704	Age Activated
Ikzf3	61.2391	1.04318	0.277429	3.76016	0.000169804	0.00489734	Age Activated
Vmp1	907.468	0.41761	0.113027	3.69477	0.000220088	0.0059854	Age Activated
Mapt	293.364	0.53676	0.134769	3.9828	6.81072e-05	0.00235643	Age Activated
Slc13a3	593.109	1.04616	0.174066	6.01009	1.8542e-09	2.74019e-07	Age Activated
Wnt9b	15.8642	1.76672	0.615565	2.87007	0.00410379	0.0564578	Age Activated
Slc2a4	194.733	0.577379	0.217059	2.66	0.00781395	0.0886698	Age Activated
Ikzf1	285.592	0.446634	0.167476	2.66685	0.0076566	0.0874568	Age Activated
Otop3	527.61	1.06178	0.185973	5.7093	1.13444e-08	1.38635e-06	Age Activated
Etnppl	33.9389	1.89998	0.52821	3.59701	0.0003219	0.00815015	Age Activated
Gdpd2	27.6194	1.29752	0.443892	2.92304	0.00346628	0.0497599	Age Activated
Lrp11	990.625	0.318238	0.0966286	3.29342	0.000989775	0.0190983	Age Activated
Crybg1	214.54	0.465445	0.172983	2.69069	0.00713038	0.0836514	Age Activated
Fabp7	485.584	1.74436	0.527716	3.3055	0.000948079	0.0184808	Age Activated
Zwint	1371.35	0.210525	0.0788085	2.67135	0.0075546	0.0866552	Age Activated
Uhrf1bp1l	392.55	0.360402	0.135009	2.66947	0.00759713	0.0870305	Age Activated
Plek	465.348	0.535917	0.14646	3.65913	0.000253077	0.00668235	Age Activated
Elane	106.54	2.10787	0.739454	2.85057	0.00436412	0.0591312	Age Activated
Dock2	447.071	0.385595	0.136183	2.83146	0.00463367	0.0617084	Age Activated
Irak3	313.098	0.66711	0.180546	3.69495	0.000219926	0.0059854	Age Activated
Il9r	55.1576	0.846155	0.285448	2.9643	0.00303368	0.0447979	Age Activated
Cyfip2	983.455	0.521046	0.138635	3.75839	0.000171013	0.00490752	Age Activated
Havcr2	69.3519	1.05099	0.295082	3.56169	0.000368481	0.0089373	Age Activated
Adcy1	351.662	0.493955	0.179603	2.75026	0.00595486	0.0730995	Age Activated
Nampt	1346.57	0.625806	0.21892	2.85861	0.00425503	0.0579	Age Activated
Nrcam	2084.75	0.30895	0.104171	2.96578	0.00301912	0.044652	Age Activated
Cmpk2	294.391	0.439747	0.142332	3.08959	0.00200435	0.0328273	Age Activated
Rsad2	347.61	0.570655	0.150292	3.79696	0.000146479	0.00434867	Age Activated
Bcap29	364.415	0.321768	0.119805	2.68577	0.00723623	0.0846095	Age Activated
Asic2	123.223	0.575933	0.197942	2.90961	0.00361885	0.0512935	Age Activated
Atp2a3	866.334	0.498846	0.156802	3.18137	0.00146578	0.0258684	Age Activated
Aanat	42.2564	3.06102	1.0927	2.80134	0.00508911	0.0655923	Age Activated
Tac4	352.74	1.73159	0.265131	6.53108	6.52976e-11	1.39869e-08	Age Activated
Pik3r5	191.548	0.545955	0.191702	2.84793	0.00440041	0.0593471	Age Activated
Gfap	600.129	0.794308	0.190685	4.16554	3.10619e-05	0.00121345	Age Activated
Sptlc2	1262.48	0.232666	0.0874755	2.65979	0.00781894	0.0886736	Age Activated
Vrk1	262.787	0.400858	0.15224	2.63308	0.00846153	0.0934593	Age Activated
Srsf5	7912.5	0.229288	0.0746784	3.07033	0.00213819	0.0345445	Age Activated
Ccdc88c	543.501	0.394933	0.131385	3.00592	0.00264778	0.0402851	Age Activated
Aldh6a1	704.105	0.381562	0.120781	3.15913	0.00158241	0.0276164	Age Activated
Hhipl1	148.238	0.915925	0.280247	3.26827	0.00108206	0.0204242	Age Activated
Meg3	14881.2	0.458472	0.10266	4.46592	7.97237e-06	0.000387717	Age Activated
Fdft1	546.195	0.316671	0.101964	3.10571	0.00189823	0.0315225	Age Activated
Scgn	66.0986	3.38172	0.345971	9.77457	1.44764e-22	2.29982e-19	Age Activated
Irf4	95.9685	1.22294	0.264025	4.63189	3.62335e-06	0.000201975	Age Activated
Edn1	112.376	0.968523	0.323383	2.99497	0.00274471	0.0414293	Age Activated
Cap2	202.607	0.653803	0.20954	3.12018	0.00180739	0.0303578	Age Activated
Syk	809.532	0.536956	0.114453	4.69151	2.71194e-06	0.000158105	Age Activated
Auh	1067.98	0.248616	0.0874037	2.84446	0.00444874	0.059768	Age Activated
Nkd2	827.668	0.609088	0.129591	4.70009	2.60049e-06	0.000152541	Age Activated
Cartpt	53.1109	2.28262	0.515278	4.42987	9.42894e-06	0.000448934	Age Activated
Iqgap2	298.199	0.535668	0.138912	3.85616	0.00011518	0.00354734	Age Activated
Prxl2a	974.848	0.305395	0.103772	2.94293	0.00325126	0.0471832	Age Activated
Rgr	60.0443	1.93368	0.309017	6.25752	3.91138e-10	7.03458e-08	Age Activated
Bmp4	562.926	0.748618	0.193348	3.87187	0.000108003	0.00338646	Age Activated
Lcp1	1976.37	0.245521	0.0876026	2.80267	0.00506813	0.06546	Age Activated
Enox1	340.851	0.718857	0.123787	5.80719	6.35288e-09	8.3525e-07	Age Activated
Clu	8899.17	0.255637	0.0927235	2.75698	0.00583383	0.0720312	Age Activated
C6	22.8295	2.01275	0.581853	3.45921	0.000541766	0.0120939	Age Activated
Npr3	1817.5	0.461155	0.0952887	4.83956	1.30128e-06	8.70443e-05	Age Activated
Sla	256.123	0.678172	0.205551	3.29928	0.000969318	0.0187987	Age Activated
Parvg	147.064	0.811949	0.216172	3.75604	0.000172627	0.00493396	Age Activated
Nckap1l	823.392	0.333525	0.0950415	3.50925	0.000449369	0.0105893	Age Activated
Pde1b	259.992	0.500348	0.149513	3.34652	0.000818339	0.0165966	Age Activated
Ppp1r1a	324.963	0.743705	0.134819	5.51631	3.46201e-08	3.74999e-06	Age Activated
Shisa9	54.3871	0.820462	0.277382	2.95787	0.00309768	0.0454963	Age Activated
Fgf12	144.551	0.801574	0.208335	3.84753	0.000119316	0.00362782	Age Activated
Rogdi	843.306	0.265308	0.0984625	2.69451	0.00704927	0.0829039	Age Activated
Ly6c2	302.571	1.90753	0.209413	9.10895	8.31849e-20	8.8102e-17	Age Activated
Mapk12	740.919	0.525824	0.117713	4.46702	7.93168e-06	0.000387717	Age Activated
Acr	26.7899	1.17552	0.432837	2.71586	0.00661046	0.0788129	Age Activated
Alcam	1401.17	0.698036	0.130902	5.33253	9.68558e-08	9.27869e-06	Age Activated
Adcy5	1206.99	0.260774	0.0979246	2.66301	0.00774449	0.0881438	Age Activated
Cxadr	416.959	0.325838	0.12076	2.69824	0.0069708	0.0821331	Age Activated
Samsn1	185.249	0.751898	0.166269	4.52217	6.12094e-06	0.000310345	Age Activated
Lmbr1l	690.704	0.365046	0.136534	2.67367	0.00750259	0.0863183	Age Activated
Soat2	47.9386	1.02595	0.383716	2.67372	0.00750151	0.0863183	Age Activated
Sncg	390.359	0.340995	0.130565	2.61168	0.00900978	0.0978146	Age Activated
Cxcl13	79.3722	1.21358	0.339215	3.57763	0.000346727	0.00855954	Age Activated
Abcc1	1324.96	0.268968	0.0942364	2.85419	0.00431472	0.0586285	Age Activated
Sult1c2	31.6321	1.55111	0.445279	3.48347	0.000494965	0.0113824	Age Activated
Slc38a1	1879.07	0.209388	0.0804616	2.60234	0.00925905	0.0992317	Age Activated
Scg5	247.436	0.898754	0.186429	4.82088	1.42926e-06	9.36335e-05	Age Activated
Ache	177.394	1.72871	0.216664	7.97878	1.47791e-15	9.71548e-13	Age Activated
Mx2	86.5979	0.662746	0.235148	2.81842	0.00482607	0.0634511	Age Activated
Slc22a3	9.57092	2.2531	0.780935	2.88513	0.00391252	0.0544101	Age Activated
Pde10a	118.305	0.831427	0.245746	3.38328	0.00071625	0.0149886	Age Activated
Pla2g7	638.097	0.716084	0.198672	3.60436	0.000312923	0.00798208	Age Activated
Sult1c1	33.0643	4.0536	1.35621	2.98891	0.00279975	0.041961	Age Activated
Clic5	388.287	0.489747	0.140875	3.47647	0.000508056	0.0115776	Age Activated
Trem2	349.211	0.659632	0.144278	4.57194	4.83219e-06	0.000258041	Age Activated
Treml1	16.6321	2.00274	0.607534	3.2965	0.000978975	0.0189667	Age Activated
Cbs	71.9628	1.0421	0.3175	3.28221	0.00102995	0.0197017	Age Activated
Tedc2	215.487	0.611344	0.224687	2.72087	0.00651104	0.0778252	Age Activated
C3	842.424	1.16905	0.404553	2.88973	0.00385578	0.0540115	Age Activated
Map3k8	166.812	0.755596	0.22226	3.39961	0.000674825	0.0143102	Age Activated
Syt4	310.646	0.745474	0.142779	5.22116	1.77802e-07	1.59449e-05	Age Activated
Psmb8	479.066	0.481924	0.123483	3.90275	9.51051e-05	0.00306782	Age Activated
Ltb	116.303	0.880792	0.209551	4.20324	2.6312e-05	0.00106969	Age Activated
Aqp4	155.69	0.894113	0.182258	4.90575	9.30719e-07	6.67039e-05	Age Activated
Ppp2r2b	450.566	1.22041	0.170263	7.16781	7.62064e-13	2.74113e-10	Age Activated
Megf10	72.7445	1.29093	0.371654	3.47346	0.000513787	0.0116467	Age Activated
Slc22a6	366.085	1.30522	0.199127	6.55474	5.57378e-11	1.24016e-08	Age Activated
Cd5	22.3572	1.88031	0.455853	4.12481	3.71041e-05	0.00141188	Age Activated
Cd6	24.9859	2.16135	0.489301	4.41722	9.99808e-06	0.000470625	Age Activated
Ms4a4c	79.9873	0.73555	0.258284	2.84783	0.00440184	0.0593471	Age Activated
Ms4a6b	337.37	0.607075	0.195257	3.1091	0.00187656	0.0312444	Age Activated
Ms4a4d	46.7106	1.14077	0.338874	3.36637	0.000761657	0.01563	Age Activated
Ms4a6d	207.831	0.765041	0.293322	2.6082	0.00910204	0.0983681	Age Activated
Ms4a3	17.0212	3.33656	0.694887	4.80159	1.57409e-06	9.93659e-05	Age Activated
Lpxn	111.115	0.522417	0.198939	2.62601	0.00863924	0.0947633	Age Activated
Trpm6	132.936	0.733822	0.198568	3.69557	0.000219393	0.00598357	Age Activated
Syt7	222.118	0.486023	0.183676	2.64609	0.00814277	0.0909396	Age Activated
Rin1	144.877	0.608239	0.224495	2.70937	0.00674118	0.0800211	Age Activated
Lao1	22.6483	2.2615	0.75089	3.01176	0.0025974	0.0396955	Age Activated
Sorbs1	550.736	0.440336	0.109812	4.00991	6.07407e-05	0.00215234	Age Activated
Casp7	403.863	0.526784	0.120867	4.35839	1.31023e-05	0.000586345	Age Activated
Hspa12a	659.513	0.414359	0.120796	3.43023	0.000603079	0.0130797	Age Activated
Atp10a	327.464	0.763688	0.22144	3.44874	0.000563207	0.0124271	Age Activated
Cd163l1	85.6638	0.689801	0.246036	2.80366	0.00505258	0.0654047	Age Activated
Cyp2e1	10.0202	2.62975	0.828895	3.17259	0.00151083	0.0265706	Age Activated
Cox8b	69.7548	0.96462	0.327785	2.94284	0.00325213	0.0471832	Age Activated
Ifitm1	208.608	1.09608	0.302326	3.62548	0.000288426	0.00743048	Age Activated
Ifitm3	2969.9	0.483556	0.110995	4.35653	1.32139e-05	0.000589951	Age Activated
Sigirr	216.042	0.508017	0.172115	2.95161	0.00316125	0.0461808	Age Activated
Irf7	660.464	0.962415	0.154998	6.2092	5.32559e-10	9.22972e-08	Age Activated
Dock9	1206.53	0.273735	0.101333	2.70134	0.00690606	0.0815215	Age Activated
Cpeb1	660.46	0.384102	0.0987524	3.88955	0.000100431	0.00321784	Age Activated
Nmb	31.0271	1.46108	0.549488	2.65898	0.00783784	0.0887823	Age Activated
Ccr1	135.244	1.51281	0.356975	4.23786	2.25659e-05	0.000935211	Age Activated
Uimc1	585.234	0.336318	0.112855	2.98009	0.00288163	0.0429183	Age Activated
Gria4	134.379	0.887018	0.219586	4.03951	5.35636e-05	0.00193764	Age Activated
Sox17	488.592	0.418882	0.152822	2.74098	0.00612566	0.0744293	Age Activated
Adhfe1	61.9959	0.855257	0.26885	3.18117	0.00146683	0.0258684	Age Activated
Tfap2b	152.84	0.473405	0.168027	2.81743	0.0048409	0.0635704	Age Activated
Gsta3	119.87	1.14002	0.372772	3.05822	0.00222655	0.0356398	Age Activated
Slc9a2	610.381	0.502382	0.180178	2.78825	0.00529931	0.0671715	Age Activated
Il18rap	56.9512	1.17267	0.324987	3.60837	0.000308127	0.00788475	Age Activated
Il18r1	44.0344	0.865832	0.319832	2.70715	0.00678638	0.0803921	Age Activated
Il1r2	20.8595	2.36167	0.870513	2.71296	0.00666853	0.0793563	Age Activated
Stat1	517.133	0.430871	0.129813	3.31917	0.00090285	0.0178364	Age Activated
Dst	2234.63	0.261917	0.0770317	3.40012	0.000673563	0.0142993	Age Activated
Cyp27a1	526.985	0.331243	0.118641	2.79198	0.0052386	0.0667625	Age Activated
Cxcr2	61.8151	1.3628	0.484724	2.81151	0.00493097	0.0642104	Age Activated
Ptprn	1422.36	1.26211	0.342641	3.68346	0.000230091	0.00619557	Age Activated
Sp100	954.76	0.538892	0.0996995	5.40516	6.47507e-08	6.60111e-06	Age Activated
Pdcd1	19.9829	2.22069	0.514944	4.31249	1.61424e-05	0.000705824	Age Activated
Inpp5d	704.629	0.43982	0.162228	2.71112	0.00670559	0.0797475	Age Activated
Rgs2	947.285	0.30363	0.0993322	3.05671	0.00223781	0.0357259	Age Activated
Ptprc	786.66	0.519043	0.111503	4.65496	3.24043e-06	0.000184405	Age Activated
Ifi211	148.111	1.14535	0.192534	5.94881	2.70093e-09	3.9008e-07	Age Activated
Slamf9	155.266	0.61916	0.187904	3.29509	0.000983901	0.0190427	Age Activated
Astn1	42.7389	0.994499	0.309465	3.21361	0.00131078	0.0236667	Age Activated
Soat1	938.882	0.41332	0.135547	3.04928	0.00229393	0.0363218	Age Activated
Nphs2	46.4453	1.02141	0.314327	3.2495	0.00115607	0.0215437	Age Activated
Slc30a10	22.0284	1.69934	0.478863	3.5487	0.00038714	0.00930698	Age Activated
Fcgr2b	857.415	0.546067	0.161798	3.37499	0.00073818	0.0152632	Age Activated
Stxbp1	2213.33	0.247953	0.0767534	3.23052	0.00123566	0.0226506	Age Activated
Cytip	128.114	0.600662	0.197329	3.04395	0.00233491	0.036757	Age Activated
Ifih1	566.007	0.332562	0.104433	3.18445	0.00145031	0.0256482	Age Activated
Grin1	214.007	0.699709	0.153624	4.55467	5.2467e-06	0.000277842	Age Activated
Psd4	220.671	0.515397	0.183944	2.80192	0.0050799	0.0655675	Age Activated
Ly75	46.7565	1.00946	0.30529	3.30655	0.000944534	0.0184445	Age Activated
Zfp385b	272.492	0.463569	0.176421	2.62763	0.00859811	0.094565	Age Activated
Prg2	74.7831	1.71499	0.435729	3.93591	8.28837e-05	0.0027624	Age Activated
Slc43a3	948.414	0.491227	0.161886	3.0344	0.00241013	0.0377541	Age Activated
Pamr1	289.412	0.795287	0.274026	2.90223	0.00370516	0.0524	Age Activated
Fgf7	145.969	0.678677	0.197487	3.43657	0.000589139	0.0128358	Age Activated
Slc28a2	98.381	0.671854	0.207803	3.23313	0.00122444	0.0225315	Age Activated
Adam33	431.155	0.51956	0.143922	3.61001	0.000306189	0.00784569	Age Activated
Siglec1	690.908	0.428699	0.13785	3.1099	0.00187153	0.0312424	Age Activated
Slc23a2	9908.12	0.238231	0.0684306	3.48134	0.000498905	0.0114592	Age Activated
Mal	545.866	0.586034	0.219953	2.66435	0.00771363	0.0878451	Age Activated
Slc20a1	653.201	0.555221	0.193554	2.86856	0.00412343	0.056472	Age Activated
Stmn2	148.963	0.554825	0.195931	2.83174	0.00462952	0.0617084	Age Activated
Zbp1	234.163	0.75682	0.181014	4.181	2.90229e-05	0.00115752	Age Activated
Slc7a11	506.926	1.13254	0.15836	7.15172	8.56966e-13	2.9704e-10	Age Activated
Bche	404.131	0.578064	0.207134	2.79077	0.00525835	0.0669596	Age Activated
Ptpn22	110.057	0.891984	0.249676	3.57256	0.000353503	0.00864351	Age Activated
Cd2	45.0224	1.13113	0.322822	3.50388	0.000458539	0.0107655	Age Activated
Vcam1	1529.76	0.613604	0.151604	4.04742	5.17852e-05	0.00189488	Age Activated
Lrat	38.5761	1.27793	0.359211	3.5576	0.000374264	0.00904305	Age Activated
Gucy1b1	484.617	0.477937	0.109359	4.37036	1.2404e-05	0.0005618	Age Activated
Alpk1	298.498	0.499286	0.14829	3.36695	0.000760048	0.0156137	Age Activated
Ifi44	149.809	0.948588	0.226173	4.19409	2.7397e-05	0.00109957	Age Activated
Sh2d2a	39.4215	1.02009	0.353183	2.88827	0.00387365	0.0541005	Age Activated
Gbp3	749.15	0.506727	0.158693	3.19312	0.00140745	0.0250998	Age Activated
Cga	48.9063	2.33212	0.336488	6.93076	4.18587e-12	1.19104e-09	Age Activated
Coro2a	150.804	0.68282	0.238362	2.86464	0.00417485	0.0570124	Age Activated
Tnfsf8	21.7876	1.61221	0.519386	3.10408	0.00190874	0.0316144	Age Activated
Spink4	232.192	0.538931	0.174833	3.08254	0.00205239	0.0334417	Age Activated
Tal2	623.528	0.889991	0.241684	3.68246	0.000230995	0.00620237	Age Activated
Cd72	287.088	0.786509	0.173889	4.52306	6.09506e-06	0.000309883	Age Activated
Sgip1	239.012	1.03111	0.153524	6.71627	1.86431e-11	4.73884e-09	Age Activated
Cdkn2c	228.712	0.536879	0.164622	3.26128	0.00110912	0.0208318	Age Activated
Lrp8	520.062	0.343593	0.113406	3.02977	0.0024474	0.0381187	Age Activated
Col9a2	164.76	0.710542	0.258318	2.75065	0.0059478	0.0730994	Age Activated
Ctps	364.029	0.549856	0.185732	2.96048	0.00307163	0.0451834	Age Activated
Slc2a1	2015.71	0.768801	0.169079	4.547	5.4415e-06	0.000284393	Age Activated
Pdzk1ip1	70.2875	1.06702	0.320906	3.32503	0.000884075	0.0176482	Age Activated
Hpca	273.759	0.491058	0.155504	3.15786	0.00158933	0.0276704	Age Activated
Csf3r	300.723	0.593283	0.210869	2.81351	0.00490042	0.0640312	Age Activated
Fgr	138.542	0.801477	0.255833	3.13282	0.00173137	0.0293916	Age Activated
Abcb1b	201.903	0.62987	0.202909	3.1042	0.00190797	0.0316144	Age Activated
Nos3	538.07	0.374836	0.124922	3.00055	0.00269491	0.0409042	Age Activated
Prkcz	443.126	0.437293	0.144777	3.02045	0.00252398	0.0389928	Age Activated
Gabrd	81.3405	1.69869	0.259244	6.55246	5.65957e-11	1.24016e-08	Age Activated
Htt	908.757	0.293284	0.0967046	3.03278	0.00242311	0.0378951	Age Activated
Crmp1	429.559	0.559907	0.145894	3.83776	0.000124161	0.00376313	Age Activated
Dpysl5	44.3713	0.878092	0.301765	2.90985	0.00361597	0.0512935	Age Activated
Sel1l3	72.605	1.50426	0.309544	4.85959	1.1763e-06	8.09567e-05	Age Activated
Uchl1	109.139	1.18758	0.388794	3.05452	0.00225419	0.0358115	Age Activated
Epha5	82.4572	1.51976	0.31053	4.89407	9.8773e-07	7.02615e-05	Age Activated
Paics	1818.95	0.230424	0.0860837	2.67674	0.00743413	0.0861022	Age Activated
Gbp9	558.137	0.397312	0.143057	2.7773	0.00548124	0.0685658	Age Activated
Slc10a6	37.8264	2.23815	0.788681	2.83784	0.00454199	0.0608921	Age Activated
Plac8	157.174	0.766778	0.212859	3.60229	0.000315425	0.00802838	Age Activated
Nos1	60.1648	1.61175	0.412692	3.90545	9.40515e-05	0.00304932	Age Activated
Afm	16.7949	1.48348	0.560897	2.64483	0.0081732	0.0911726	Age Activated
Anxa3	1418.7	0.6787	0.200916	3.37802	0.000730086	0.0151618	Age Activated
Oasl2	1242.49	0.660589	0.108765	6.07356	1.25107e-09	1.98754e-07	Age Activated
Lfng	708.545	0.417984	0.144917	2.88429	0.00392295	0.0544698	Age Activated
Oas1b	152.271	0.765412	0.179103	4.27359	1.92352e-05	0.000820357	Age Activated
Adcyap1r1	427.039	0.795331	0.123337	6.44846	1.12994e-10	2.29161e-08	Age Activated
Abcg2	1532.52	0.393581	0.130636	3.01279	0.00258854	0.0396369	Age Activated
Gpnmb	309.28	1.38915	0.322296	4.31016	1.63135e-05	0.000711674	Age Activated
Npy	29.4836	2.72536	0.544442	5.00579	5.56335e-07	4.2766e-05	Age Activated
Zc3hav1	911.553	0.456221	0.0940635	4.85013	1.23379e-06	8.37026e-05	Age Activated
Slc13a4	1929.61	0.410696	0.141727	2.8978	0.00375786	0.0529189	Age Activated
Rab19	44.5071	0.996532	0.373948	2.6649	0.00770116	0.0877656	Age Activated
Prok2	14.35	4.06876	1.32086	3.08038	0.00206738	0.0335998	Age Activated
Usp18	196.129	0.777734	0.177602	4.37909	1.19174e-05	0.000543523	Age Activated
Slc6a13	333.364	1.12178	0.211015	5.31613	1.05995e-07	1.00034e-05	Age Activated
Mfap5	854.703	0.326405	0.113646	2.87213	0.00407714	0.0562829	Age Activated
Gdf3	12.9568	1.98357	0.722848	2.7441	0.00606773	0.0740245	Age Activated
Clec4d	37.1528	1.93952	0.68084	2.84872	0.0043896	0.0593078	Age Activated
Clec2d	519.992	0.568593	0.209579	2.71302	0.00666721	0.0793563	Age Activated
Klra2	55.245	0.809559	0.281747	2.87335	0.00406143	0.0561066	Age Activated
Arhgdib	966.242	0.313644	0.112574	2.78611	0.00533448	0.0673933	Age Activated
Slco1a4	688.901	0.75484	0.132184	5.71052	1.12634e-08	1.38635e-06	Age Activated
Cpne9	642.398	0.777796	0.250236	3.10825	0.00188199	0.0312932	Age Activated
Slc6a1	221.277	1.61763	0.231783	6.97906	2.97165e-12	8.64697e-10	Age Activated
Pglyrp1	152.208	1.24287	0.332519	3.73773	0.00018569	0.00520259	Age Activated
Ttyh1	1285.49	0.630829	0.20366	3.09747	0.00195181	0.0321602	Age Activated
Trpm1	50.3397	2.04602	0.387283	5.28303	1.27068e-07	1.17593e-05	Age Activated
Synm	1016.31	0.365425	0.113086	3.23138	0.00123193	0.0226258	Age Activated
Ctsc	1968.57	0.305886	0.0813833	3.75859	0.000170873	0.00490752	Age Activated
Cd22	113.311	1.41612	0.21647	6.5419	6.07411e-11	1.31587e-08	Age Activated
Sh3gl3	30.3578	1.78601	0.48522	3.68082	0.000232482	0.00622524	Age Activated
Coro1a	1230.65	0.530327	0.137629	3.85332	0.000116529	0.00357732	Age Activated
Sgf29	166.502	0.567935	0.17956	3.16293	0.0015619	0.0273426	Age Activated
Slco2b1	974.581	0.378598	0.124071	3.05146	0.00227729	0.0360883	Age Activated
Dgat2	342.746	0.490203	0.168077	2.91654	0.00353934	0.0504668	Age Activated
Itgam	216.506	0.604947	0.210813	2.86959	0.00411008	0.0564578	Age Activated
Itgax	191.933	0.459736	0.174904	2.62851	0.00857599	0.0944498	Age Activated
Cd37	402.104	0.506117	0.153739	3.29206	0.000994562	0.0191518	Age Activated
Itgal	308.195	0.468105	0.137963	3.39299	0.000691347	0.0145633	Age Activated
Trim30a	400.978	0.696993	0.135874	5.12971	2.90189e-07	2.41579e-05	Age Activated
Stk33	40.4941	0.908741	0.314475	2.88971	0.00385594	0.0540115	Age Activated
Slc38a5	187.51	0.977093	0.293518	3.3289	0.000871887	0.0174517	Age Activated
Sytl4	154.632	0.529411	0.197158	2.68521	0.00724848	0.0846722	Age Activated
Il2rg	115.424	0.621807	0.203556	3.05473	0.00225265	0.0358115	Age Activated
F7	15.0063	1.93663	0.736903	2.62807	0.00858701	0.0945166	Age Activated
F10	19.5445	1.65012	0.541264	3.04864	0.00229883	0.0363692	Age Activated
Saraf	4451.05	0.185471	0.0693118	2.67589	0.00745309	0.0862288	Age Activated
Slc7a2	2041.61	0.271145	0.0921141	2.94358	0.00324439	0.0471425	Age Activated
Cbln1	1388.22	0.788316	0.104444	7.54776	4.42795e-14	2.28147e-11	Age Activated
Hp	238.697	1.26844	0.347101	3.65438	0.000257801	0.00677031	Age Activated
Cdh15	32.6563	1.42203	0.511321	2.78109	0.00541768	0.0679491	Age Activated
Adamts8	54.1489	1.00815	0.36743	2.74378	0.00607365	0.0740245	Age Activated
Pou2af1	95.1244	1.66531	0.268906	6.1929	5.90668e-10	9.96505e-08	Age Activated
Dixdc1	363.305	0.39041	0.144218	2.70707	0.00678795	0.0803921	Age Activated
Cd3e	22.0221	1.3768	0.449638	3.06201	0.00219856	0.0352805	Age Activated
Ddx25	210.302	0.451574	0.159064	2.83895	0.00452626	0.0607239	Age Activated
Tmod2	409.582	0.550413	0.142572	3.86059	0.000113113	0.00350063	Age Activated
Rab27a	362.781	0.528663	0.126937	4.16478	3.11654e-05	0.001215	Age Activated
Paqr5	214.715	0.736016	0.165926	4.4358	9.17303e-06	0.000438282	Age Activated
Acsbg1	101.608	1.44605	0.377128	3.83438	0.000125883	0.00380323	Age Activated
Thsd4	2143.02	0.776765	0.185718	4.1825	2.88315e-05	0.00115229	Age Activated
Gclc	942.61	0.651375	0.187163	3.48026	0.000500926	0.0114918	Age Activated
Plscr1	459.412	0.375084	0.132999	2.82021	0.00479919	0.0631849	Age Activated
Plscr2	426.467	0.456474	0.130181	3.50645	0.000454123	0.0106882	Age Activated
Plscr4	432.087	0.368661	0.115172	3.20095	0.00136974	0.024519	Age Activated
Lrrc2	25.363	1.29913	0.421506	3.08212	0.00205529	0.0334604	Age Activated
Dclk3	58.562	1.22287	0.327409	3.73499	0.000187722	0.00523972	Age Activated
Nudt16	326.012	0.366821	0.138225	2.6538	0.00795899	0.0896751	Age Activated
Oas3	112.446	0.831676	0.220491	3.77192	0.000161995	0.00470056	Age Activated
Oas2	328.711	0.722433	0.16013	4.51154	6.43576e-06	0.000325441	Age Activated
Bmp8a	52.8115	1.81117	0.630688	2.87173	0.00408235	0.056314	Age Activated
Lama1	80.524	0.936671	0.261798	3.57784	0.00034645	0.00855954	Age Activated
Abcc4	1169.47	0.529497	0.163273	3.24301	0.00118273	0.0218697	Age Activated
Ccdc85a	219.717	0.671082	0.157849	4.25142	2.12423e-05	0.000891991	Age Activated
Resp18	5.96439	5.95968	1.82589	3.264	0.00109852	0.0206735	Age Activated
Gm9758	9.42525	2.00957	0.715793	2.80747	0.00499317	0.0648432	Age Activated
Rac2	571.728	0.439751	0.13932	3.15642	0.00159721	0.0277321	Age Activated
Wnt6	155.373	0.826948	0.205561	4.02288	5.74909e-05	0.00205245	Age Activated
Rtp4	379.689	0.574736	0.122121	4.70628	2.52273e-06	0.000149113	Age Activated
Lpar6	195.264	0.628472	0.200892	3.12841	0.00175755	0.0297566	Age Activated
Crlf2	754.753	0.591741	0.118267	5.00342	5.63231e-07	4.31222e-05	Age Activated
Casp4	110.973	0.965635	0.256575	3.76356	0.000167509	0.00483847	Age Activated
Tlr13	158.932	0.699433	0.237381	2.94646	0.00321437	0.0467776	Age Activated
Lgals3bp	2965.58	0.349829	0.116915	2.99217	0.00277002	0.0417123	Age Activated
Vav1	374.367	0.492999	0.13143	3.75103	0.000176107	0.00498117	Age Activated
Tspan8	107.028	0.771308	0.20945	3.68255	0.000230915	0.00620237	Age Activated
Tmem63c	52.9193	1.05015	0.321179	3.26967	0.00107672	0.0203435	Age Activated
Tspoap1	916.429	0.486315	0.120066	4.05038	5.11338e-05	0.00187464	Age Activated
Rnf43	158.345	0.647432	0.207097	3.12623	0.00177065	0.0298724	Age Activated
Usp54	513.95	0.71674	0.274192	2.61401	0.00894876	0.0973184	Age Activated
Ramp1	296.864	0.798683	0.250312	3.19075	0.00141902	0.0252146	Age Activated
Parp14	852.21	0.28814	0.09928	2.9023	0.00370436	0.0524	Age Activated
Gbp8	153.066	0.787188	0.208836	3.76941	0.000163636	0.0047368	Age Activated
Ifit1	582.759	1.03123	0.138944	7.42192	1.15434e-13	5.11775e-11	Age Activated
Scara3	3862.22	0.464347	0.175677	2.64318	0.00821302	0.0912962	Age Activated
Rasd2	63.5781	0.860974	0.305172	2.82127	0.00478336	0.06302	Age Activated
Ly6d	66.0899	1.14505	0.262566	4.361	1.29467e-05	0.000582115	Age Activated
Ankrd12	1673.53	0.286041	0.0971423	2.94456	0.00323414	0.0470295	Age Activated
Cacna1a	179.22	0.565417	0.175377	3.224	0.00126411	0.0230173	Age Activated
Itga2b	293.915	0.69568	0.248187	2.80305	0.00506224	0.0654282	Age Activated
Cpne7	178.117	0.794563	0.225678	3.52079	0.000430262	0.0102356	Age Activated
Cxcl10	132.704	0.855831	0.262539	3.25982	0.00111483	0.0209184	Age Activated
Dpp4	168.349	0.56012	0.186101	3.00976	0.00261451	0.0399063	Age Activated
Igsf6	195.96	0.498016	0.174931	2.84692	0.00441441	0.0594324	Age Activated
Baz1a	207.581	0.58677	0.176245	3.32929	0.000870679	0.0174517	Age Activated
Ccl5	92.8764	0.831683	0.242432	3.43059	0.000602274	0.0130772	Age Activated
Dcbld2	606.985	0.442171	0.11163	3.96103	7.46268e-05	0.00254506	Age Activated
Ubd	10.1064	2.29738	0.839701	2.73595	0.00622	0.0751921	Age Activated
Chrnb4	5775.02	0.246769	0.0823937	2.995	0.00274449	0.0414293	Age Activated
Slfn8	288.855	0.611437	0.151987	4.02296	5.74715e-05	0.00205245	Age Activated
Eogt	780.746	0.298231	0.0928488	3.21201	0.00131811	0.0237734	Age Activated
Impg2	567.798	0.563044	0.163577	3.44207	0.000577277	0.0126497	Age Activated
Hpse	120.582	0.606844	0.221166	2.74384	0.00607251	0.0740245	Age Activated
Ccl12	96.5262	1.57785	0.246116	6.41102	1.44547e-10	2.90067e-08	Age Activated
Nfkbiz	323.86	0.544084	0.195821	2.77848	0.00546143	0.0684078	Age Activated
Ccl7	75.7904	1.16943	0.350024	3.341	0.000834772	0.016876	Age Activated
Ccl2	76.7624	1.05773	0.398764	2.65252	0.00798941	0.0898055	Age Activated
Isg15	346.22	0.667173	0.170774	3.90675	9.35452e-05	0.00303807	Age Activated
Arhgap45	1376.46	0.385267	0.102564	3.75635	0.00017241	0.00493396	Age Activated
Abca7	883.649	0.365936	0.136839	2.6742	0.00749088	0.0863183	Age Activated
Mlc1	162.058	0.648941	0.181758	3.57035	0.000356508	0.00868003	Age Activated
Syt1	781.118	1.51021	0.151908	9.94155	2.74533e-23	4.7579e-20	Age Activated
Dcdc2a	261.821	0.629262	0.171206	3.67547	0.000237414	0.00633903	Age Activated
H2.Q4	1570.03	0.924157	0.164741	5.60976	2.02603e-08	2.31282e-06	Age Activated
Tmem59l	184.887	1.54112	0.166517	9.25502	2.14188e-20	2.40193e-17	Age Activated
Phf24	173.886	0.676466	0.165434	4.08904	4.33157e-05	0.00161283	Age Activated
Rorb	237.556	0.419068	0.143333	2.92374	0.00345859	0.0496869	Age Activated
Cdh8	25.8605	2.15599	0.466502	4.62162	3.80756e-06	0.000210398	Age Activated
Slc6a20a	606.448	0.935265	0.196329	4.76376	1.90022e-06	0.000116108	Age Activated
Pnpla7	716.851	0.414095	0.127315	3.25252	0.00114388	0.0213375	Age Activated
C1qa	3678.93	0.297458	0.0802472	3.70678	0.000209914	0.0057768	Age Activated
C1qb	3149.8	0.31317	0.0906104	3.45623	0.00054779	0.0121714	Age Activated
Piwil4	60.9022	1.75574	0.601635	2.91829	0.00351958	0.0502602	Age Activated
Scd1	2137.33	0.502919	0.0772561	6.50976	7.52691e-11	1.57685e-08	Age Activated
Mgarp	999.018	0.637763	0.167167	3.81512	0.000136118	0.00408447	Age Activated
Zfyve28	55.8048	0.828656	0.312393	2.6526	0.00798735	0.0898055	Age Activated
Traf3ip3	63.5171	0.831468	0.253744	3.2768	0.00104993	0.0199958	Age Activated
Tap1	1028	0.504484	0.12512	4.032	5.53045e-05	0.00199024	Age Activated
Mfsd2b	117.977	0.605199	0.203553	2.97317	0.0029474	0.0438294	Age Activated
Ccn3	5259.96	0.860635	0.177777	4.84109	1.29126e-06	8.6678e-05	Age Activated
Enpp1	524.674	0.645129	0.243119	2.65355	0.00796497	0.0896894	Age Activated
Icam1	1240.17	0.427604	0.1531	2.79297	0.0052226	0.0667087	Age Activated
Serpine1	354.907	0.998685	0.292992	3.40858	0.00065302	0.0139565	Age Activated
Cep85	707.908	0.452678	0.172572	2.62312	0.00871282	0.0953509	Age Activated
H2.M11	8.02686	3.07746	0.904279	3.40321	0.00066598	0.0141857	Age Activated
H2.DMb2	93.2875	0.944958	0.246268	3.83711	0.000124491	0.00376713	Age Activated
Kcnmb2	9.80923	2.33409	0.881616	2.64751	0.00810872	0.090852	Age Activated
Ctnna1	6987.81	0.184628	0.0661615	2.79057	0.00526152	0.0669596	Age Activated
Ifi206	57.9989	0.870321	0.300344	2.89775	0.00375851	0.0529189	Age Activated
Aim2	106.566	0.554599	0.205416	2.69988	0.00693637	0.0818111	Age Activated
Acer2	476.29	1.53225	0.273927	5.59364	2.22354e-08	2.52319e-06	Age Activated
Cd84	294.186	0.936615	0.27977	3.3478	0.000814558	0.0165375	Age Activated
Slamf7	93.4061	0.727556	0.251631	2.89136	0.00383583	0.0538486	Age Activated
Ostm1	599.981	0.443645	0.143501	3.09157	0.001991	0.0326648	Age Activated
Fcrla	32.5134	1.10471	0.385101	2.86863	0.00412259	0.056472	Age Activated
Hdhd3	340.119	0.442077	0.158748	2.78477	0.00535665	0.0675162	Age Activated
Grtp1	246.321	0.417924	0.14279	2.92686	0.00342407	0.0492768	Age Activated
Car14	658.926	0.339385	0.124324	2.72985	0.00633638	0.0761164	Age Activated
Ciart	216.78	1.39137	0.32406	4.29356	1.75829e-05	0.00075837	Age Activated
Ctss	2168.17	0.661885	0.0976849	6.77572	1.23791e-11	3.2777e-09	Age Activated
Hoxb4	27.0784	1.09152	0.412419	2.64663	0.00812975	0.0909396	Age Activated
Pbx3	574.206	0.371391	0.110398	3.36412	0.000767888	0.0157071	Age Activated
Vill	486.993	0.515012	0.139427	3.69377	0.000220949	0.00600026	Age Activated
Ephx1	2493.51	0.271571	0.101748	2.66905	0.00760652	0.0870305	Age Activated
Garnl3	884.025	0.541984	0.113486	4.7758	1.78995e-06	0.000111881	Age Activated
Irs2	516.133	0.529442	0.196661	2.69215	0.00709931	0.0833895	Age Activated
Bmp6	1540.3	0.521894	0.168733	3.09301	0.00198136	0.0325626	Age Activated
Rlbp1	128.004	0.958784	0.204704	4.68375	2.81669e-06	0.000163712	Age Activated
Srrm2	8915.27	0.230233	0.0833429	2.76248	0.00573641	0.0711508	Age Activated
Gimap3	202.273	1.22995	0.187665	6.55398	5.60217e-11	1.24016e-08	Age Activated
Tnfsf10	684.946	0.578762	0.131249	4.40965	1.03536e-05	0.000483776	Age Activated
Tspan10	27.7295	1.80976	0.53749	3.36705	0.000759772	0.0156137	Age Activated
Dock3	81.8646	0.886201	0.251666	3.52133	0.000429385	0.0102323	Age Activated
Rhou	304.992	0.42381	0.15845	2.67473	0.00747892	0.0863183	Age Activated
Zc3h12d	56.9124	0.94786	0.320854	2.95418	0.00313502	0.0458329	Age Activated
Ifi203	545.066	0.396406	0.119086	3.32874	0.000872401	0.0174517	Age Activated
Stat2	1396.61	0.246166	0.0874297	2.81559	0.00486877	0.0637488	Age Activated
Plcb2	190.036	0.665475	0.176383	3.7729	0.000161363	0.00468936	Age Activated
Thbs1	9879.5	0.407868	0.114218	3.57096	0.000355678	0.00867091	Age Activated
Sema3d	205.863	0.706708	0.193199	3.65794	0.000254252	0.00669937	Age Activated
Ctsg	45.1634	2.38091	0.525809	4.52809	5.95199e-06	0.000305846	Age Activated
Slc25a28	947.787	0.269621	0.103022	2.61713	0.00886734	0.0967642	Age Activated
Sgms1	1025.75	0.323807	0.0825472	3.92269	8.75653e-05	0.00288685	Age Activated
Xaf1	333.123	0.451623	0.129925	3.47602	0.000508917	0.0115776	Age Activated
C3ar1	437.399	0.687782	0.156202	4.40317	1.06683e-05	0.000492446	Age Activated
Abcb1a	1619.93	0.623376	0.119581	5.213	1.85811e-07	1.64758e-05	Age Activated
Ildr2	2229.3	0.746459	0.103301	7.22602	4.97346e-13	1.93498e-10	Age Activated
Apobec1	563.712	0.408619	0.110651	3.69286	0.00022175	0.00600488	Age Activated
Mthfd1l	146.158	1.06001	0.253878	4.17527	2.97629e-05	0.00118208	Age Activated
Cd53	417.384	0.571855	0.124165	4.60562	4.11237e-06	0.000225282	Age Activated
Zmynd15	301.662	0.43156	0.130775	3.30003	0.000966739	0.0187677	Age Activated
Plekhh2	162.219	0.456111	0.163982	2.78147	0.00541136	0.0679145	Age Activated
Begain	189.743	0.630079	0.190652	3.30486	0.000950222	0.0185036	Age Activated
Slc16a11	796.876	0.508905	0.14317	3.55454	0.000378642	0.00913726	Age Activated
Slc22a2	64.1865	1.04937	0.339648	3.08959	0.00200434	0.0328273	Age Activated
Arhgap11a	189.557	0.680184	0.157642	4.31473	1.59797e-05	0.000701931	Age Activated
Chd7	460.902	0.347867	0.129602	2.68412	0.00727218	0.084739	Age Activated
Myzap	321.942	0.634295	0.202488	3.13251	0.00173318	0.0293963	Age Activated
Shtn1	536.596	0.452396	0.111188	4.06873	4.72693e-05	0.00174302	Age Activated
Cldn5	1221.47	0.433014	0.153025	2.82969	0.00465926	0.0618984	Age Activated
Irf8	723.384	0.376009	0.103094	3.64723	0.000265083	0.00692266	Age Activated
Rbp3	11216.6	0.346655	0.064842	5.34614	8.98483e-08	8.78393e-06	Age Activated
Fbxo2	276.028	0.572836	0.163794	3.49729	0.000470011	0.0109539	Age Activated
Nlrp5.ps	48.9176	1.13171	0.309268	3.6593	0.0002529	0.00668235	Age Activated
Ggact	363.482	0.538677	0.170151	3.16588	0.00154613	0.0270914	Age Activated
Bbox1	21.7805	1.30245	0.493034	2.64171	0.00824891	0.0914818	Age Activated
Mpped1	17.1805	1.47597	0.504242	2.92711	0.00342131	0.0492768	Age Activated
Prrxl1	40.6629	3.02413	0.395923	7.63818	2.20314e-14	1.23532e-11	Age Activated
Oasl1	110.19	0.937671	0.240466	3.89939	9.64363e-05	0.00310551	Age Activated
Oosp1	7.42301	2.69406	0.889139	3.02997	0.00244577	0.0381187	Age Activated
Bend6	196.095	0.544969	0.191092	2.85187	0.00434635	0.0590162	Age Activated
Lyn	577.218	0.323492	0.112517	2.87505	0.00403959	0.0558453	Age Activated
Grap2	117.581	0.856904	0.218448	3.9227	8.7562e-05	0.00288685	Age Activated
Gzmk	16.9105	2.03059	0.601502	3.37586	0.00073586	0.0152317	Age Activated
Fcmr	35.2234	1.18307	0.35818	3.30299	0.000956596	0.0186008	Age Activated
Itpr3	1029.58	0.579663	0.15244	3.80257	0.000143202	0.00426563	Age Activated
Apobr	159.392	0.713383	0.219869	3.24458	0.00117625	0.0217709	Age Activated
Foxf1	76.6719	0.850134	0.26169	3.24863	0.00115962	0.0215467	Age Activated
Flt3	68.5679	0.763755	0.251531	3.03642	0.00239402	0.0375325	Age Activated
Serpinb6b	261.666	0.463997	0.172438	2.6908	0.00712803	0.0836514	Age Activated
Ifi209	138.844	0.644835	0.199181	3.23744	0.00120608	0.0222582	Age Activated
X2900052L18Rik	261.086	0.674918	0.160665	4.20078	2.65994e-05	0.00107435	Age Activated
Vsig4	22.4304	2.08341	0.522227	3.98948	6.62179e-05	0.00229941	Age Activated
Gpr4	645.638	0.402489	0.127321	3.1612	0.00157121	0.0274551	Age Activated
Snhg11	3889.33	0.60692	0.0949266	6.39358	1.62049e-10	3.18485e-08	Age Activated
Pcare	33.1764	1.04193	0.389694	2.67372	0.00750159	0.0863183	Age Activated
Dock5	880.775	0.392472	0.141581	2.77208	0.00557001	0.069585	Age Activated
Ackr2	36.5199	1.06162	0.345837	3.0697	0.00214271	0.0345881	Age Activated
Tlr7	208.22	0.63104	0.167084	3.77679	0.000158861	0.00464314	Age Activated
Kcnj10	132.137	0.884746	0.236372	3.74302	0.000181823	0.00511251	Age Activated
Arhgef37	75.0068	0.924013	0.344054	2.68566	0.00723867	0.0846095	Age Activated
Tubb2b	216.478	0.60186	0.177856	3.38397	0.000714446	0.0149672	Age Activated
Cirbp	3081.91	0.351086	0.0908008	3.86655	0.000110387	0.00344421	Age Activated
Cxcr4	173.031	0.905221	0.321377	2.81669	0.00485209	0.0636178	Age Activated
Adrb2	163.092	0.56235	0.199624	2.81704	0.0048468	0.0635922	Age Activated
Ccdc9b	721.179	0.478772	0.152784	3.13365	0.00172644	0.0293602	Age Activated
Ifit2	467.876	0.808352	0.112941	7.15732	8.2268e-13	2.90436e-10	Age Activated
Gpr158	90.5668	2.89664	0.30893	9.37636	6.82921e-21	9.29943e-18	Age Activated
Lrrc8d	621.8	0.395657	0.127868	3.09427	0.001973	0.0324561	Age Activated
Hpcal4	48.159	1.33907	0.325973	4.10793	3.99229e-05	0.00150477	Age Activated
Gldn	110.014	0.858039	0.254162	3.37596	0.000735595	0.0152317	Age Activated
Ccbe1	208.589	0.587725	0.163848	3.58702	0.000334473	0.00835731	Age Activated
Gm5424	50.2382	1.26943	0.36825	3.4472	0.000566431	0.0124837	Age Activated
Bst2	1235.36	0.5397	0.112273	4.80704	1.53182e-06	9.78708e-05	Age Activated
Nxph3	126.395	0.900693	0.264747	3.40209	0.000668737	0.0142286	Age Activated
Mpeg1	2099.16	0.598034	0.103712	5.76632	8.10222e-09	1.04365e-06	Age Activated
Atp10d	365.269	0.352407	0.120188	2.93213	0.00336644	0.0486733	Age Activated
Irgm1	886.437	0.285812	0.109059	2.62071	0.00877468	0.0959728	Age Activated
Acsm4	6.50395	5.08424	1.78426	2.8495	0.00437875	0.0592452	Age Activated
Gpr68	212.669	0.688743	0.154117	4.46895	7.86038e-06	0.000385219	Age Activated
Fgfbp3	155.132	0.588779	0.204189	2.88351	0.00393276	0.0545664	Age Activated
Hs3st3a1	86.5088	0.775525	0.234303	3.30992	0.000933231	0.018266	Age Activated
Sned1	1371.16	0.517755	0.118409	4.37261	1.22769e-05	0.000558585	Age Activated
Cd300lf	106.641	1.09968	0.393371	2.79554	0.0051813	0.0664713	Age Activated
A4galt	519.077	0.331106	0.127183	2.60339	0.00923079	0.0990297	Age Activated
Gp5	23.2225	1.94954	0.588988	3.30999	0.00093299	0.018266	Age Activated
Fcrl5	5.96775	3.50017	1.1607	3.01555	0.00256511	0.0394398	Age Activated
Entpd1	1323.6	0.413832	0.15755	2.62667	0.00862243	0.0947202	Age Activated
Selplg	461.673	0.622607	0.128395	4.84916	1.23987e-06	8.37026e-05	Age Activated
Fgfbp1	45.1702	1.83945	0.445416	4.12973	3.63195e-05	0.00138479	Age Activated
Osr1	356.806	0.801768	0.160552	4.99381	5.91986e-07	4.51425e-05	Age Activated
Ranbp3l	185.666	1.16823	0.237596	4.9169	8.7926e-07	6.37347e-05	Age Activated
Jaml	85.7722	1.46344	0.469504	3.117	0.00182701	0.0306011	Age Activated
Tmem252	976.296	0.431988	0.0933015	4.63002	3.65623e-06	0.000203214	Age Activated
Myof	1866.51	0.382781	0.0891465	4.29384	1.75608e-05	0.00075837	Age Activated
Gm12185	37.0432	0.895817	0.329798	2.71626	0.00660233	0.0787652	Age Activated
Arhgap30	665.875	0.371031	0.104602	3.54708	0.000389525	0.00934075	Age Activated
Ndnf	777.311	0.334508	0.126534	2.64363	0.00820221	0.0912292	Age Activated
Scn3b	40.374	1.18673	0.422245	2.81052	0.00494608	0.0642755	Age Activated
Upk1b	200.258	0.606802	0.185136	3.2776	0.00104693	0.0199587	Age Activated
Gpr55	16.374	1.74364	0.582841	2.99161	0.00277507	0.0417552	Age Activated
Mmp12	65.0779	1.3458	0.291382	4.61868	3.86194e-06	0.000212786	Age Activated
Apol10b	124.078	0.628368	0.223984	2.80542	0.00502513	0.0651694	Age Activated
Grrp1	355.295	0.52734	0.202055	2.60988	0.00905731	0.098023	Age Activated
Ch25h	67.9659	1.07823	0.330937	3.25811	0.00112158	0.0210038	Age Activated
Tmem37	151.518	0.597026	0.17241	3.46283	0.000534526	0.0119885	Age Activated
Creg2	14.5671	1.89654	0.620441	3.05677	0.00223737	0.0357259	Age Activated
Gpr183	122.311	0.704893	0.222276	3.17125	0.00151784	0.0266692	Age Activated
Cd14	446.568	0.528244	0.18943	2.7886	0.00529361	0.0671477	Age Activated
Spn	207.594	0.717276	0.160177	4.47802	7.53378e-06	0.000374021	Age Activated
Lax1	57.1533	1.11677	0.293682	3.80265	0.000143156	0.00426563	Age Activated
Zfp217	498.279	0.279016	0.106988	2.60793	0.00910907	0.0983883	Age Activated
Sema5b	126.777	1.65756	0.220584	7.51442	5.71657e-14	2.70113e-11	Age Activated
Rasal3	147.497	0.537931	0.191107	2.81482	0.00488048	0.0638583	Age Activated
Gm14964	154.377	0.652497	0.172807	3.77588	0.000159446	0.00464783	Age Activated
Doc2a	31.7715	2.28947	0.423059	5.41171	6.2424e-08	6.39813e-06	Age Activated
Tchh	114.567	1.03231	0.21468	4.80861	1.51981e-06	9.78708e-05	Age Activated
C130026I21Rik	37.014	2.97123	0.451964	6.57405	4.8966e-11	1.12709e-08	Age Activated
Sh2d6	269.383	1.48889	0.526109	2.83	0.00465474	0.0618815	Age Activated
A630001G21Rik	140.096	0.534313	0.179768	2.97224	0.0029564	0.0439289	Age Activated
Oas1a	158.961	0.945524	0.203757	4.64045	3.47646e-06	0.000194505	Age Activated
Sv2b	259.488	0.865265	0.170716	5.06845	4.01058e-07	3.15941e-05	Age Activated
Cd8b1	22.4455	1.65014	0.462271	3.56964	0.000357468	0.00869231	Age Activated
Clec12a	349.279	0.375076	0.119714	3.13309	0.00172975	0.0293903	Age Activated
Mapk11	201.971	0.455873	0.172623	2.64086	0.0082697	0.091659	Age Activated
Aldh1a1	585.979	0.718259	0.260739	2.7547	0.00587451	0.0723928	Age Activated
Cbx7	1701.59	0.271064	0.0980421	2.76477	0.00569627	0.0707912	Age Activated
Nebl	408.678	0.684188	0.143453	4.76942	1.84758e-06	0.000113988	Age Activated
Pde5a	676.268	0.289584	0.107483	2.69422	0.0070553	0.0829236	Age Activated
Cd8a	47.2829	1.72822	0.329868	5.23911	1.61352e-07	1.47178e-05	Age Activated
Tmem179	274.267	0.78611	0.138515	5.67526	1.38477e-08	1.64996e-06	Age Activated
Iigp1	744.925	0.661756	0.191123	3.46247	0.000535245	0.0119905	Age Activated
Slfn5	1835.63	0.277653	0.0900965	3.08172	0.00205806	0.0334769	Age Activated
Cadps	65.5798	1.40707	0.277677	5.0673	4.03508e-07	3.16563e-05	Age Activated
Slc8a1	494.109	0.801001	0.192218	4.16715	3.08436e-05	0.00120988	Age Activated
Mmrn1	253.754	0.661914	0.207173	3.19498	0.00139839	0.024985	Age Activated
X5830411N06Rik	9.97274	1.90359	0.719357	2.64623	0.00813935	0.0909396	Age Activated
Hmgb2	599.879	0.570126	0.169054	3.37245	0.00074502	0.0153879	Age Activated
Phactr1	535.85	1.06669	0.158917	6.71221	1.91701e-11	4.80867e-09	Age Activated
Nt5c1a	18.4135	1.28187	0.491014	2.61067	0.00903653	0.0979935	Age Activated
Nyap2	145.398	0.951891	0.267826	3.55414	0.000379215	0.00913952	Age Activated
Naaladl1	18.1866	1.35189	0.483188	2.79785	0.00514437	0.066131	Age Activated
C1ra	1779.17	0.219358	0.0725679	3.0228	0.00250445	0.0387539	Age Activated
Adh7	60.8131	1.51344	0.567925	2.66486	0.00770205	0.0877656	Age Activated
Slc6a2	50.5877	2.54323	0.477546	5.32562	1.00607e-07	9.58984e-06	Age Activated
Map6	321.717	0.724971	0.142589	5.08433	3.68929e-07	2.93052e-05	Age Activated
H2.Q5	254.289	1.20872	0.216316	5.58777	2.30003e-08	2.59455e-06	Age Activated
Nap1l5	416.644	0.492131	0.137176	3.58759	0.000333754	0.00835731	Age Activated
Lair1	222.454	0.73943	0.173251	4.26796	1.97268e-05	0.000839445	Age Activated
Kbtbd11	735.243	0.729638	0.241738	3.0183	0.002542	0.0391812	Age Activated
Per2	644.846	0.773449	0.219992	3.51581	0.000438422	0.0103956	Age Activated
Clca3a1	62.0369	1.68738	0.490754	3.43833	0.000585313	0.0127963	Age Activated
H2.T22	1252.68	0.354438	0.0943123	3.75813	0.000171187	0.00490752	Age Activated
Pla2g4a	834.584	0.280196	0.0996205	2.81264	0.00491372	0.0640341	Age Activated
Spock1	200.234	0.692487	0.165945	4.17299	3.00632e-05	0.00118659	Age Activated
Ms4a4b	55.0432	1.17807	0.316604	3.72094	0.000198479	0.00550772	Age Activated
Tmem154	176.605	0.587584	0.195106	3.01162	0.00259861	0.0396955	Age Activated
Jakmip3	38.3422	1.35495	0.378928	3.57574	0.000349235	0.00857965	Age Activated
Glipr1	47.2817	1.06333	0.338488	3.1414	0.00168141	0.0287999	Age Activated
Ide	1401.02	0.43172	0.110066	3.92238	8.76777e-05	0.00288685	Age Activated
BC051142	118.847	0.657153	0.221616	2.96528	0.0030241	0.0446911	Age Activated
Bcl2	325.866	0.558549	0.178728	3.12514	0.00177723	0.0299568	Age Activated
Apol9a	50.7953	1.0679	0.308873	3.45741	0.000545386	0.0121463	Age Activated
Trim30d	179.922	0.65459	0.164014	3.99106	6.57785e-05	0.00229027	Age Activated
Lepr	746.721	0.448385	0.143806	3.11798	0.00182095	0.0305317	Age Activated
Prtn3	104.798	1.83026	0.37269	4.91093	9.06441e-07	6.53954e-05	Age Activated
Cacnb2	193.726	0.420356	0.156906	2.67903	0.00738352	0.0856722	Age Activated
Sez6l	65.3155	1.06584	0.301088	3.53997	0.000400174	0.00956005	Age Activated
Gpr182	332.816	0.554798	0.213077	2.60375	0.00922107	0.0989984	Age Activated
Gm8369	19.6085	1.33009	0.495834	2.68254	0.00730664	0.0849352	Age Activated
Fcer1g	670.765	0.345939	0.113597	3.04532	0.00232431	0.0367114	Age Activated
Kcnt1	688.446	0.695171	0.176047	3.94879	7.85465e-05	0.00265028	Age Activated
Col13a1	679.752	0.452277	0.111817	4.04479	5.23707e-05	0.00190898	Age Activated
Pirb	428.091	0.755316	0.217617	3.47085	0.000518806	0.0117325	Age Activated
Col25a1	114.724	0.994226	0.220465	4.50968	6.49269e-06	0.000326959	Age Activated
Fcgr4	121.358	1.11897	0.331066	3.3799	0.00072512	0.0150914	Age Activated
Ifitm6	80.3155	1.31792	0.404965	3.2544	0.00113631	0.0212378	Age Activated
Pde1a	319.862	0.559196	0.139954	3.99558	6.45373e-05	0.00226165	Age Activated
Skap2	496.875	0.458248	0.1091	4.20026	2.66614e-05	0.00107457	Age Activated
Ptk2b	512.146	0.351986	0.134846	2.61028	0.00904671	0.098023	Age Activated
Atp8b4	58.614	0.81672	0.314238	2.59904	0.00934835	0.0998611	Age Activated
Zfp941	15.6316	1.49856	0.522353	2.86886	0.0041196	0.056472	Age Activated
Kng2	18.6771	3.66636	1.08421	3.3816	0.00072066	0.0150478	Age Activated
H2.Q7	995.18	1.39001	0.184772	7.5228	5.36144e-14	2.62078e-11	Age Activated
H2.Eb1	7242.45	0.37523	0.134497	2.78989	0.00527262	0.0670264	Age Activated
B2m	7072	0.358536	0.0665327	5.38887	7.09033e-08	7.15185e-06	Age Activated
H2.K1	9747.18	0.659983	0.103419	6.38164	1.75196e-10	3.33993e-08	Age Activated
Cxcl12	5580.96	0.311758	0.0770423	4.04659	5.19696e-05	0.00189798	Age Activated
Dpp6	370.238	0.751177	0.140469	5.34762	8.91163e-08	8.75729e-06	Age Activated
Adgrg5	35.9221	1.27741	0.354721	3.60118	0.000316771	0.0080519	Age Activated
Akap6	91.554	0.873238	0.280859	3.10917	0.00187612	0.0312444	Age Activated
Akr1b10	315.428	0.467648	0.142409	3.28383	0.00102405	0.0196403	Age Activated
Sphk1	459.367	1.12967	0.258951	4.36251	1.28581e-05	0.00058087	Age Activated
Lhfpl5	33.9464	1.02838	0.362437	2.83741	0.00454805	0.0609304	Age Activated
Trank1	217.949	3.09108	0.266066	11.6177	3.34976e-31	1.5279e-27	Age Activated
Cytl1	375.729	0.705196	0.168965	4.17361	2.99808e-05	0.00118659	Age Activated
Ifit3b	297.226	0.663387	0.147712	4.49108	7.08642e-06	0.000353653	Age Activated
Msln	85.34	1.65029	0.458703	3.59774	0.000320995	0.00814841	Age Activated
Ldha	4714.45	0.25116	0.0671998	3.73752	0.000185846	0.00520259	Age Activated
Syt10	28.5817	1.58234	0.471338	3.35713	0.000787559	0.0160406	Age Activated
Parp10	730.594	0.322294	0.117378	2.74579	0.0060366	0.0737761	Age Activated
Gm8995	239.183	0.675514	0.165134	4.09071	4.30054e-05	0.00160756	Age Activated
Luzp2	72.1297	0.647885	0.248766	2.6044	0.00920362	0.098961	Age Activated
Sema3e	55.2685	0.92266	0.343988	2.68224	0.00731305	0.084958	Age Activated
Col23a1	1169.01	0.726697	0.119863	6.06273	1.33826e-09	2.10848e-07	Age Activated
Tnfrsf11b	322.767	0.577376	0.161397	3.57737	0.000347069	0.00855954	Age Activated
Slc22a8	588.108	0.942166	0.143411	6.5697	5.04166e-11	1.14422e-08	Age Activated
Nr6a1	117.2	0.831296	0.211029	3.93925	8.17374e-05	0.00273376	Age Activated
Mro	27.2611	1.2914	0.420825	3.06873	0.00214974	0.0346704	Age Activated
Ipcef1	52.6544	0.839955	0.314278	2.67265	0.0075255	0.0864454	Age Activated
Rab44	137.04	0.634892	0.230911	2.74951	0.00596844	0.0732189	Age Activated
Gimap8	272.701	0.431888	0.15505	2.78548	0.00534479	0.0674789	Age Activated
Cntn4	56.5621	1.74937	0.371572	4.70802	2.50129e-06	0.00014855	Age Activated
Aox3	378.387	0.643803	0.138229	4.65751	3.20055e-06	0.000183229	Age Activated
Hhip	315.583	0.653809	0.156916	4.16662	3.09151e-05	0.0012102	Age Activated
mt.Rnr2	9439.35	0.24646	0.0626449	3.93425	8.34584e-05	0.0027767	Age Activated
mt.Co1	54497.6	0.184787	0.0664339	2.78152	0.00541052	0.0679145	Age Activated
mt.Tp	221.376	0.535548	0.164356	3.25846	0.00112018	0.0209982	Age Activated
Serpina3f	70.0621	1.59357	0.570178	2.79486	0.00519218	0.0665661	Age Activated
Nrxn3	189.986	1.3306	0.343084	3.87837	0.000105159	0.00331453	Age Activated
Ifi208	68.6492	0.677146	0.2488	2.72166	0.00649559	0.0777839	Age Activated
Oas1g	68.3011	0.911446	0.269661	3.37997	0.000724945	0.0150914	Age Activated
Jchain	1114.68	1.91091	0.202779	9.4236	4.35862e-21	6.39175e-18	Age Activated
H2.M9	28.6535	2.01594	0.508132	3.96735	7.26756e-05	0.00248741	Age Activated
H2.K2	177.617	0.602884	0.207001	2.91247	0.0035858	0.0509387	Age Activated
H2.T23	2711.45	0.549889	0.113134	4.8605	1.17088e-06	8.08755e-05	Age Activated
H2.Q10	58.5627	2.46103	0.609181	4.03989	5.34754e-05	0.00193764	Age Activated
H2.Eb2	17.0974	2.00352	0.544526	3.67938	0.000233803	0.00625137	Age Activated
Nnat	1206.84	1.10678	0.215289	5.14092	2.73394e-07	2.28596e-05	Age Activated
Phf11d	175.058	0.49725	0.174491	2.84971	0.00437589	0.0592452	Age Activated
Apol9b	53.4665	1.26698	0.375785	3.37156	0.000747441	0.0154212	Age Activated
Tlx2	36.1774	1.29346	0.456951	2.83064	0.00464554	0.0618022	Age Activated
D430041D05Rik	65.7448	1.1876	0.305513	3.88723	0.000101395	0.00324329	Age Activated
Slc7a14	49.6458	0.933904	0.353243	2.6438	0.00819819	0.0912292	Age Activated
Adgrv1	216.677	0.439245	0.167407	2.62381	0.00869513	0.0952667	Age Activated
Ctxn3	245.177	0.601388	0.196336	3.06306	0.00219086	0.0351866	Age Activated
Ank3	406.096	0.400579	0.138123	2.90017	0.00372962	0.0527068	Age Activated
Msi2	2082.77	0.219368	0.0809304	2.71057	0.00671672	0.0798302	Age Activated
Sp140	157.901	0.438548	0.165554	2.64897	0.00807369	0.090646	Age Activated
Sp110	385.505	0.657363	0.128169	5.12888	2.91469e-07	2.41589e-05	Age Activated
Rnf213	1127.88	0.439375	0.0867958	5.06217	4.14508e-07	3.2386e-05	Age Activated
Adamtsl3	1093.23	0.731079	0.160701	4.54932	5.38189e-06	0.000283161	Age Activated
Srarp	35.8277	1.59952	0.459966	3.47747	0.000506171	0.0115776	Age Activated
Lrrc8b	216.526	0.424107	0.154983	2.73648	0.00621003	0.0751332	Age Activated
Dgkd	2670.07	0.459538	0.122609	3.748	0.000178248	0.00502181	Age Activated
Lilra5	103.723	0.5903	0.212035	2.78397	0.00536981	0.0675491	Age Activated
Rabepk	754.533	0.361995	0.132706	2.7278	0.00637573	0.0765409	Age Activated
Hrct1	69.7858	0.881592	0.320347	2.75199	0.00592345	0.0728546	Age Activated
Serpina1b	7.9231	2.21773	0.849838	2.60959	0.00906497	0.098023	Age Activated
Naip5	202.715	0.835877	0.166191	5.02962	4.9146e-07	3.82416e-05	Age Activated
Setdb2	193.223	0.520662	0.178277	2.92052	0.00349444	0.050051	Age Activated
Csf2rb	468.237	0.494362	0.18101	2.73113	0.00631167	0.0759152	Age Activated
Csf2rb2	243.029	0.658476	0.213391	3.08577	0.00203023	0.0331657	Age Activated
A530040E14Rik	47.3807	1.5476	0.321514	4.81348	1.48326e-06	9.58536e-05	Age Activated
Slfn2	518.866	0.667614	0.142671	4.67939	2.87732e-06	0.000166222	Age Activated
Slfn10.ps	23.3939	1.17133	0.450512	2.6	0.00932227	0.0996832	Age Activated
Myo18b	39.3915	1.13534	0.376798	3.01312	0.00258576	0.0396262	Age Activated
Gm5127	41.273	1.08055	0.35107	3.07786	0.00208492	0.0338271	Age Activated
Gm10499	15.2056	2.29259	0.628492	3.64777	0.000264527	0.00691763	Age Activated
H2.T.ps	36.437	1.21048	0.353674	3.42259	0.000620271	0.0133765	Age Activated
H2.Q6	1291.91	1.38953	0.16657	8.34199	7.30495e-17	6.33007e-14	Age Activated
H2.D1	11495.6	0.387479	0.106032	3.65436	0.000257829	0.00677031	Age Activated
C4b	2955.25	1.44982	0.188001	7.71175	1.24103e-14	7.39343e-12	Age Activated
H2.Ab1	6514.67	0.370641	0.138873	2.66892	0.0076095	0.0870305	Age Activated
Ifi204	247.105	0.738198	0.195571	3.77458	0.000160276	0.00466489	Age Activated
Ifi207	324.022	1.06094	0.274589	3.86375	0.000111661	0.00347827	Age Activated
Ifi213	137.064	1.03867	0.178779	5.80979	6.25531e-09	8.28133e-07	Age Activated
Pappa2	348.925	0.98935	0.166045	5.95833	2.54836e-09	3.70854e-07	Age Activated
Gm4951	217.957	0.711895	0.168065	4.23584	2.27699e-05	0.00093958	Age Activated
Fam169b	28.9036	1.49841	0.433652	3.45534	0.000549608	0.0121834	Age Activated
Nlrc5	331.138	0.812262	0.171411	4.73867	2.15122e-06	0.000129956	Age Activated
Adh1	111.837	0.921914	0.352535	2.6151	0.00892023	0.0970636	Age Activated
Ceacam1	580.063	0.394071	0.128946	3.05609	0.00224246	0.0357259	Age Activated
Sirpb1c	15.6327	1.47052	0.549608	2.67557	0.00746016	0.0862288	Age Activated
Arrdc3	765.389	0.551199	0.158437	3.47898	0.000503326	0.0115329	Age Activated
Ifit3	1149.92	0.785823	0.164918	4.76494	1.8891e-06	0.0001158	Age Activated
Grem1	140.275	0.99925	0.22497	4.4417	8.92502e-06	0.000428581	Age Activated
Gabrr3	65.0716	1.02376	0.255577	4.00567	6.1842e-05	0.00218172	Age Activated
AW112010	170.824	0.624965	0.173988	3.592	0.000328153	0.008275	Age Activated
Nxpe3	121.485	0.660025	0.248565	2.65534	0.00792289	0.0894619	Age Activated
Ly6a	2090.9	1.05951	0.172637	6.13722	8.39774e-10	1.39213e-07	Age Activated
Ass1	260.977	1.13917	0.208492	5.46384	4.65946e-08	4.90762e-06	Age Activated
Trbc2	44.2646	1.16128	0.339246	3.42311	0.000619086	0.0133661	Age Activated
Igkv16.104	51.6622	3.64605	0.70099	5.20129	1.9791e-07	1.70832e-05	Age Activated
Igkv15.103	118.007	3.35326	0.988558	3.39208	0.000693653	0.0145797	Age Activated
Igkv12.98	8.89273	2.99073	1.09226	2.7381	0.00617946	0.0748921	Age Activated
Igkv4.91	18.166	2.51145	0.897425	2.79851	0.0051339	0.066041	Age Activated
Igkv1.88	9.4278	5.63421	1.50203	3.75106	0.000176089	0.00498117	Age Activated
Igkv4.80	25.3279	3.76309	0.777765	4.83833	1.30932e-06	8.7276e-05	Age Activated
Igkv4.79	6.27149	5.03614	1.51196	3.33086	0.000865768	0.0173737	Age Activated
Igkv4.74	9.67604	2.65493	0.91011	2.91716	0.00353239	0.0504053	Age Activated
Igkv4.57.1	44.0026	3.34391	0.678178	4.93073	8.19236e-07	6.03008e-05	Age Activated
Igkv4.50	34.8369	5.30381	1.5145	3.50201	0.000461756	0.0107975	Age Activated
Igkv5.48	25.715	2.89114	0.81406	3.5515	0.000383039	0.00922002	Age Activated
Igkv5.39	53.2611	6.26804	0.865265	7.24407	4.35415e-13	1.72932e-10	Age Activated
Igkv6.32	13.8439	2.36287	0.903124	2.61633	0.00888819	0.0968647	Age Activated
Igkv8.27	16.7374	2.18909	0.565359	3.87203	0.000107932	0.00338646	Age Activated
Igkv8.21	78.7665	4.06192	1.34715	3.01519	0.00256821	0.0394524	Age Activated
Igkv6.20	78.5302	3.32864	0.95741	3.47671	0.000507606	0.0115776	Age Activated
Igkv3.10	18.5337	4.35473	0.890291	4.89135	1.00146e-06	7.09734e-05	Age Activated
Igkc	5022.1	2.30019	0.17604	13.0663	5.12823e-39	3.25882e-35	Age Activated
Ighg2b	2114.2	4.005	0.345187	11.6024	4.0073e-31	1.5279e-27	Age Activated
Ighg1	524.865	3.00869	0.871176	3.4536	0.00055316	0.0122479	Age Activated
Ighg3	228.386	2.72026	0.98989	2.74804	0.00599519	0.0734527	Age Activated
Ighm	8267.76	2.11533	0.156233	13.5395	9.13499e-42	8.70747e-38	Age Activated
Ighv4.1	12.5904	2.44148	0.805794	3.0299	0.00244634	0.0381187	Age Activated
Ighv14.4	21.1142	4.87905	0.939778	5.19171	2.08374e-07	1.78939e-05	Age Activated
Ighv3.6	61.8191	2.84051	0.384726	7.3832	1.54526e-13	6.6952e-11	Age Activated
Ighv6.6	50.6389	5.78568	1.35717	4.26303	2.01669e-05	0.000856263	Age Activated
Ighv1.18	29.6284	2.39358	0.460201	5.20117	1.98038e-07	1.70832e-05	Age Activated
Iglv1	130.054	1.87087	0.3095	6.04482	1.49581e-09	2.33739e-07	Age Activated
Iglc2	44.4269	2.19695	0.487743	4.50432	6.65843e-06	0.000334043	Age Activated
Iglv3	13.7918	1.86634	0.650734	2.86806	0.00413003	0.0565218	Age Activated
Cyp4a12b	17.5728	2.72328	0.608502	4.47538	7.62745e-06	0.000377688	Age Activated
Slfn1	89.4224	1.04677	0.252496	4.1457	3.38776e-05	0.00129948	Age Activated
Tgtp2	285.051	0.592852	0.187825	3.15641	0.00159724	0.0277321	Age Activated
Naip2	142.872	0.716195	0.177563	4.03346	5.49605e-05	0.00198441	Age Activated
Ifi27l2a	310.127	0.832242	0.166858	4.98772	6.10958e-07	4.62194e-05	Age Activated
Prnp	3707.48	0.189263	0.0703853	2.68896	0.00716756	0.0839326	Age Activated
Cyp4v3	756.035	0.425674	0.157252	2.70696	0.00679028	0.0803921	Age Activated
H2.T10	121.284	0.93164	0.214218	4.34903	1.36742e-05	0.000609078	Age Activated
H2.Q1	45.9745	1.05814	0.342621	3.08839	0.00201247	0.0329282	Age Activated
Igkv13.85	9.69707	2.19313	0.759471	2.8877	0.00388067	0.0541274	Age Activated
Tmem243	185.306	0.428042	0.164586	2.60073	0.00930264	0.0995764	Age Activated
Gm12250	121.283	0.549819	0.201923	2.72292	0.0064708	0.0775844	Age Activated
Mir142hg	39.0025	1.10338	0.349794	3.15437	0.00160844	0.0279011	Age Activated
A730046J19Rik	18.9112	2.32048	0.567468	4.08919	4.32881e-05	0.00161283	Age Activated
Gm15222	59.3537	0.85719	0.282258	3.0369	0.00239024	0.0375279	Age Activated
L1td1	36.5855	1.68022	0.37456	4.48584	7.26276e-06	0.000361507	Age Activated
Rasgef1b	264.568	0.485303	0.179595	2.70221	0.00688812	0.08136	Age Activated
A530032D15Rik	16.802	1.79844	0.525572	3.42187	0.000621931	0.0133903	Age Activated
Gm16028	5.61298	3.96142	1.26218	3.13855	0.00169784	0.0290033	Age Activated
Mndal	539.356	0.430643	0.125097	3.44249	0.000576391	0.0126497	Age Activated
Phf11c	148.348	0.508136	0.190889	2.66195	0.00776895	0.0882641	Age Activated
Gm2619	5.59327	3.35209	1.12936	2.96813	0.00299618	0.0443817	Age Activated
Apol11b	41.8205	2.35178	0.641491	3.66612	0.000246258	0.00655679	Age Activated
Gm17019	7.19986	2.55175	0.880155	2.89921	0.00374104	0.0528291	Age Activated
Neat1	10610.3	0.501915	0.112211	4.47295	7.71483e-06	0.000379326	Age Activated
Gm20486	7.22873	3.69167	1.14988	3.21047	0.00132518	0.0238603	Age Activated
Igkv1.110	29.9995	1.65514	0.451995	3.66186	0.000250395	0.00664837	Age Activated
Ighv1.53	64.6868	4.33302	0.57548	7.5294	5.09757e-14	2.55737e-11	Age Activated
Ighv1.76	12.3311	2.58103	0.854354	3.02103	0.00251919	0.0389504	Age Activated
Igkv4.59	62.3847	3.07573	0.554924	5.54262	2.97976e-08	3.2836e-06	Age Activated
Ighv1.80	93.9822	2.36492	0.393097	6.01613	1.78639e-09	2.6606e-07	Age Activated
Ighv1.64	23.352	2.15488	0.569344	3.78485	0.000153799	0.00452474	Age Activated
Igkv3.12	18.4231	3.44811	0.668244	5.15996	2.47001e-07	2.08355e-05	Age Activated
Ighv1.74	7.59332	3.29691	1.20042	2.74646	0.00602418	0.0737131	Age Activated
Ighv2.3	24.8339	2.07404	0.499202	4.1547	3.25708e-05	0.00126462	Age Activated
Ighv1.50	6.78314	3.6213	1.10393	3.28037	0.00103671	0.0198034	Age Activated
Igkv1.117	89.4466	3.2904	0.395209	8.32571	8.38238e-17	6.9479e-14	Age Activated
Igkv8.28	14.8241	2.93522	1.0065	2.91627	0.00354248	0.0504738	Age Activated
Igkv10.96	115.763	3.26552	0.777251	4.20137	2.65306e-05	0.00107384	Age Activated
Igkv5.43	25.6972	3.53157	0.610614	5.78364	7.31001e-09	9.48014e-07	Age Activated
Ighv1.69	20.7712	4.83315	1.0153	4.76032	1.93286e-06	0.000117726	Age Activated
Ighv1.26	122.353	3.7849	0.33863	11.1771	5.27872e-29	1.43762e-25	Age Activated
Ighv1.81	20.0518	3.59549	0.786596	4.57095	4.8552e-06	0.000258546	Age Activated
Ighv1.9	120.426	4.37128	1.26421	3.45771	0.000544797	0.0121463	Age Activated
Igkv6.15	112.196	3.87421	0.89546	4.32651	1.51494e-05	0.000670088	Age Activated
Igkv9.120	44.388	4.25018	1.26426	3.36179	0.000774399	0.0158064	Age Activated
Ighv5.6	15.7059	7.36088	2.11751	3.4762	0.00050858	0.0115776	Age Activated
Igkv12.41	147.873	4.84597	1.21427	3.99086	6.58345e-05	0.00229027	Age Activated
Igha	2630.99	3.48591	0.425456	8.19334	2.54079e-16	1.86298e-13	Age Activated
Ighv1.82	99.3562	4.31729	0.979647	4.40698	1.04821e-05	0.000485027	Age Activated
Ighv1.39	58.3943	5.24896	0.747279	7.0241	2.15452e-12	6.7334e-10	Age Activated
Ighv1.7	21.5004	2.74696	0.764076	3.59515	0.000324207	0.00818634	Age Activated
Igkv3.5	32.2703	2.80748	0.580723	4.83446	1.3351e-06	8.80701e-05	Age Activated
Igkv3.2	246.097	4.95075	0.645746	7.66672	1.76445e-14	1.01932e-11	Age Activated
Ighv5.12	17.46	5.08784	1.12223	4.53368	5.7964e-06	0.000300279	Age Activated
Ighv5.17	31.8222	2.7497	0.726365	3.78556	0.000153365	0.00452474	Age Activated
Fmo6	8.43926	3.40095	1.23397	2.75611	0.0058493	0.0721754	Age Activated
Ighv14.2	23.2256	1.53544	0.5255	2.92185	0.00347955	0.0498752	Age Activated
Ighv1.55	33.1881	2.05333	0.573384	3.58107	0.000342195	0.00848406	Age Activated
Ighv10.3	33.8474	1.99336	0.738915	2.69769	0.00698228	0.0822175	Age Activated
Igkv14.111	33.2714	2.65416	0.827501	3.20745	0.00133919	0.0240626	Age Activated
Igkv6.17	30.3022	4.0112	0.671235	5.97584	2.28903e-09	3.35678e-07	Age Activated
Ighv1.58	9.30492	3.64713	1.07297	3.39909	0.000676094	0.0143102	Age Activated
Ighv1.72	16.0508	3.67367	0.946901	3.87968	0.000104596	0.00331453	Age Activated
Gm16505	40.9789	2.37737	0.389161	6.10896	1.00281e-09	1.63399e-07	Age Activated
Ighv1.85	13.6029	4.71795	1.10935	4.2529	2.1102e-05	0.000888054	Age Activated
Igkv1.135	19.375	2.48449	0.534439	4.64877	3.3392e-06	0.000188339	Age Activated
Ighv1.19	11.8114	5.96711	1.32583	4.50065	6.7746e-06	0.000338979	Age Activated
Igkv12.44	103.48	3.50129	0.876468	3.99478	6.47549e-05	0.00226512	Age Activated
Ighv1.77	8.73003	4.55287	1.22812	3.70718	0.000209583	0.0057768	Age Activated
Ighv9.3	26.6478	3.41773	0.693667	4.92705	8.34813e-07	6.07438e-05	Age Activated
Igkv14.130	16.8868	7.46573	2.68102	2.78466	0.00535837	0.0675162	Age Activated
Ighv2.2	22.9784	4.66284	1.02717	4.5395	5.63883e-06	0.000292912	Age Activated
Igkv10.94	91.2072	2.38332	0.762168	3.12703	0.00176582	0.0298172	Age Activated
Ighv1.5	18.9867	4.09965	1.11379	3.6808	0.0002325	0.00622524	Age Activated
Igkv8.19	10.7497	4.8991	1.38884	3.52746	0.000419564	0.0100107	Age Activated
Igkv9.124	15.3585	2.96098	0.763418	3.87858	0.000105067	0.00331453	Age Activated
Ighv2.9	28.2623	4.02813	1.48042	2.72094	0.00650973	0.0778252	Age Activated
Ighv1.63	9.14545	3.70514	1.33646	2.77235	0.00556539	0.0695729	Age Activated
Psmb9	606.351	0.345892	0.12894	2.68258	0.00730563	0.0849352	Age Activated
Ighv9.1	11.225	3.55857	1.26938	2.80338	0.00505699	0.0654047	Age Activated
Igkv4.55	260.589	4.1653	0.554463	7.51231	5.80918e-14	2.70113e-11	Age Activated
A530020G20Rik	191.308	0.596749	0.170959	3.49061	0.000481921	0.0111497	Age Activated
Fendrr	67.5212	1.22756	0.278418	4.40907	1.03814e-05	0.00048389	Age Activated
AU020206	688.164	0.395752	0.105442	3.75326	0.000174547	0.00496652	Age Activated
Rian	1655.48	0.317529	0.0891883	3.56021	0.000370558	0.00897627	Age Activated
Miat	187.029	0.629217	0.228094	2.75859	0.00580509	0.0717559	Age Activated
Gm26704	8.59273	2.42172	0.778422	3.11106	0.00186419	0.0311471	Age Activated
Gm27032	24.6673	1.61136	0.513286	3.1393	0.00169352	0.0289554	Age Activated
Bin2	175.758	0.922795	0.172682	5.34389	9.09727e-08	8.83593e-06	Age Activated
X1700030C10Rik.1	112.716	0.694083	0.258582	2.68419	0.00727065	0.084739	Age Activated
B130024G19Rik	200.123	0.429091	0.153391	2.79737	0.00515212	0.0661842	Age Activated
Gm18342	8.57705	2.65532	0.844895	3.14278	0.00167352	0.0287165	Age Activated
Gm37795	57.3164	0.913295	0.288823	3.16213	0.0015662	0.0273926	Age Activated
Ighd	52.1442	0.963451	0.289193	3.33151	0.000863759	0.0173737	Age Activated
Gm5547	15.4762	1.63228	0.559989	2.91484	0.00355875	0.0506298	Age Activated
A530030E21Rik	7.00405	2.48444	0.914263	2.71743	0.00657911	0.0785373	Age Activated
Gbp5	573.166	0.645984	0.227007	2.84566	0.00443201	0.0595852	Age Activated
Igkv2.109	15.4928	3.3968	0.696651	4.8759	1.08316e-06	7.56386e-05	Age Activated
Iglc1	106.797	2.71	0.333762	8.11956	4.67876e-16	3.30355e-13	Age Activated
Gm43534	9.90322	3.3746	0.892704	3.7802	0.000156701	0.00459591	Age Activated
Gm44421	20.3883	1.9296	0.62591	3.08287	0.00205014	0.0334336	Age Activated
Gm31520	139.945	1.19958	0.249202	4.8137	1.4816e-06	9.58536e-05	Age Activated
Olfr1372.ps1	112.643	0.914486	0.216676	4.22052	2.43739e-05	0.000997135	Age Activated
Gm44829	16.4344	1.66489	0.598313	2.78264	0.00539178	0.0677581	Age Activated
Gm35572	7.48954	2.47271	0.893881	2.76626	0.00567026	0.07056	Age Activated
Gm42047	472.958	0.608022	0.143992	4.22261	2.41487e-05	0.000992179	Age Activated
Lilr4b	253.459	1.24443	0.267393	4.65394	3.25648e-06	0.000184767	Age Activated
Gm47393	34.7593	1.79845	0.390007	4.61132	4.00111e-06	0.000219819	Age Activated
X2210039B01Rik	41.6408	0.890617	0.316546	2.81355	0.00489984	0.0640312	Age Activated
Gm40849	236.357	2.4316	0.335385	7.25018	4.16204e-13	1.68819e-10	Age Activated
Gm49769	26.4126	1.21842	0.42235	2.88487	0.00391579	0.0544101	Age Activated
Gpr31c	9.83205	3.38498	0.889135	3.80705	0.000140635	0.0042023	Age Activated
Gm30571	15.4342	1.78791	0.666083	2.68421	0.00727004	0.084739	Age Activated
AC167036.1	16.232	3.87409	0.775938	4.99279	5.95137e-07	4.52019e-05	Age Activated
AC147806.2	14.5282	2.40919	0.629558	3.8268	0.000129819	0.00391594	Age Activated
Gnai3	1538.73	-0.101403	0.0834585	-1.21501	0.224362	0.658138	Age Unchanged
Cdc45	65.8093	0.065734	0.251063	0.261823	0.793458	0.969716	Age Unchanged
Narf	612.688	-0.0346868	0.0966925	-0.358733	0.719795	0.952313	Age Unchanged
Cav2	560.058	0.107915	0.123882	0.871106	0.383696	0.810525	Age Unchanged
Klf6	1477.08	-0.0951633	0.158049	-0.602114	0.547098	0.891993	Age Unchanged
Scmh1	764.353	-0.132005	0.0896767	-1.47201	0.141019	0.537752	Age Unchanged
Cox5a	392.252	0.00782765	0.123968	0.0631426	0.949653	0.992557	Age Unchanged
Tbx2	544.989	-0.0180273	0.14234	-0.126649	0.899218	0.985434	Age Unchanged
Ngfr	280.276	-0.205584	0.184691	-1.11312	0.265655	0.709005	Age Unchanged
Wnt9a	714.713	-0.241872	0.210633	-1.14831	0.250841	0.691089	Age Unchanged
Fer	299.111	-0.188713	0.135187	-1.39595	0.162731	0.5745	Age Unchanged
Xpo6	1209.56	0.0547893	0.0945803	0.579288	0.562395	0.899003	Age Unchanged
Axin2	315.931	0.211405	0.198875	1.06301	0.287778	0.732151	Age Unchanged
Pih1d2	36.2865	0.11084	0.383822	0.288779	0.77275	0.964388	Age Unchanged
Dlat	887.802	-0.0918597	0.089905	-1.02174	0.306903	0.751693	Age Unchanged
Sdhd	1004.65	0.0634139	0.0981837	0.645871	0.518363	0.879814	Age Unchanged
Gpr107	1298.9	0.0425074	0.0908601	0.467834	0.639903	0.92669	Age Unchanged
Nalcn	265.319	0.0346761	0.172689	0.2008	0.840855	0.97895	Age Unchanged
Drp2	405.694	-0.0376168	0.208815	-0.180144	0.857039	0.980717	Age Unchanged
Mid2	338.173	-0.0186454	0.124456	-0.149815	0.880911	0.983506	Age Unchanged
Trim25	875.103	0.0826705	0.0959806	0.861325	0.389059	0.815369	Age Unchanged
Scpep1	1801.62	-0.0443624	0.110748	-0.40057	0.688737	0.943416	Age Unchanged
Mnt	744.353	0.0329206	0.114217	0.288228	0.773172	0.964458	Age Unchanged
Hddc2	124.589	0.235466	0.197009	1.1952	0.232008	0.666644	Age Unchanged
Tpd52l1	142.54	-0.019645	0.229906	-0.0854478	0.931905	0.989497	Age Unchanged
Clec10a	634.783	-0.155694	0.108416	-1.43609	0.150978	0.554538	Age Unchanged
Comt	1049.99	-0.140911	0.0933928	-1.5088	0.13135	0.519662	Age Unchanged
Rtca	435.894	0.092234	0.12992	0.709932	0.477746	0.861987	Age Unchanged
Mcts1	297.11	-0.0207836	0.126287	-0.164574	0.869279	0.981628	Age Unchanged
Rnf17	32.0715	0.105505	0.36163	0.291748	0.770479	0.963807	Age Unchanged
Ccm2	737.307	-0.0377813	0.0940061	-0.401903	0.687755	0.942909	Age Unchanged
Tbrg4	418.905	-0.0906186	0.110932	-0.816888	0.413993	0.829958	Age Unchanged
Tmprss2	21.4288	0.217549	0.603125	0.360702	0.718322	0.9521	Age Unchanged
Fap	1494.28	-0.223318	0.343933	-0.649306	0.516141	0.878182	Age Unchanged
Ndufa9	776.956	-0.00141877	0.10544	-0.0134557	0.989264	0.998013	Age Unchanged
Galnt1	1559.09	-0.0970236	0.0771777	-1.25715	0.208701	0.639519	Age Unchanged
Mkrn2	271.846	0.0438794	0.138284	0.317313	0.751006	0.959628	Age Unchanged
Raf1	531.001	-0.0639875	0.102904	-0.62182	0.53406	0.886703	Age Unchanged
2022-09-01	227.917	0.16757	0.163346	1.02586	0.304959	0.749604	Age Unchanged
Pdgfb	956.289	0.12932	0.138383	0.934507	0.350042	0.786193	Age Unchanged
Acvrl1	1830.59	0.153772	0.118489	1.29777	0.194366	0.620981	Age Unchanged
Acvr1b	971.254	-0.0287346	0.0969801	-0.296294	0.767005	0.962699	Age Unchanged
Tom1l2	2371.15	-0.0737188	0.0809049	-0.911178	0.362202	0.792477	Age Unchanged
Itga5	1068.64	0.13739	0.176721	0.777439	0.4369	0.84098	Age Unchanged
Wdr77	218.155	-0.0496234	0.150527	-0.329666	0.741653	0.957204	Age Unchanged
Adora3	16.9989	-0.186738	0.500166	-0.373353	0.708886	0.948964	Age Unchanged
Atp5pb	1990.13	-0.0328276	0.0770617	-0.425991	0.670114	0.937698	Age Unchanged
Sox9	467.701	0.00798619	0.1832	0.0435927	0.965229	0.994493	Age Unchanged
Hnrnpd	1291.9	-0.0057577	0.0826905	-0.0696295	0.944489	0.9913	Age Unchanged
Dynlt1c	73.5186	0.247811	0.237237	1.04457	0.296221	0.740805	Age Unchanged
C1d	496.028	0.00208591	0.112919	0.0184727	0.985262	0.997791	Age Unchanged
Gm2a	2341	-0.0388901	0.0823911	-0.472018	0.636914	0.925454	Age Unchanged
Krit1	560.64	-0.0858509	0.110229	-0.778842	0.436073	0.840585	Age Unchanged
Clcn4	1662.87	-0.0878357	0.0806211	-1.08949	0.275939	0.720243	Age Unchanged
Sema4f	63.1855	0.185849	0.264937	0.701481	0.483003	0.864473	Age Unchanged
Myo18a	2765.49	-0.058227	0.0795562	-0.731898	0.464231	0.85558	Age Unchanged
Sez6	99.2329	0.0942744	0.258363	0.364892	0.715192	0.951513	Age Unchanged
Abhd15	30.1437	0.226697	0.459258	0.493615	0.621578	0.920298	Age Unchanged
Loxl3	1470.17	-0.117683	0.16321	-0.721054	0.470876	0.858697	Age Unchanged
Kat2b	973.678	0.0413606	0.141093	0.293145	0.769412	0.963276	Age Unchanged
Rab5b	1939.79	-0.0476346	0.0768507	-0.619833	0.535368	0.88696	Age Unchanged
Spg7	1455.14	-0.088429	0.0845728	-1.0456	0.295747	0.740106	Age Unchanged
Rpl13	5974.85	0.033706	0.0625794	0.538611	0.590155	0.909075	Age Unchanged
Chmp1a	1649.15	-0.0545253	0.0836454	-0.651862	0.51449	0.877542	Age Unchanged
Tubgcp3	763.458	0.133767	0.0919927	1.45411	0.145917	0.546299	Age Unchanged
Ddx3x	3683.12	-0.067812	0.10231	-0.662808	0.507454	0.874929	Age Unchanged
Usp32	681.078	0.114285	0.128942	0.886327	0.375441	0.803965	Age Unchanged
Txnrd3	221.76	0.240425	0.156163	1.53957	0.123664	0.50579	Age Unchanged
Zfp512b	1136.25	0.0264984	0.0840117	0.315414	0.752448	0.959918	Age Unchanged
Dnajc5	2461.35	0.0226206	0.0682398	0.331487	0.740277	0.957163	Age Unchanged
Tpd52l2	994.949	-0.0051872	0.0876481	-0.0591821	0.952807	0.992696	Age Unchanged
Fmr1	646.088	-0.0513978	0.112675	-0.45616	0.648275	0.929926	Age Unchanged
Bcl11a	35.4361	0.137993	0.363701	0.379414	0.70438	0.948098	Age Unchanged
Il4	35.3806	-0.0568477	0.325811	-0.174481	0.861488	0.980717	Age Unchanged
Pxmp4	544.744	-0.164363	0.114721	-1.43271	0.151941	0.556075	Age Unchanged
Dlg3	790.029	-0.0290965	0.113195	-0.257048	0.797142	0.97075	Age Unchanged
Gnb1l	77.12	0.0711853	0.247556	0.287552	0.77369	0.964784	Age Unchanged
Mmp11	435.779	-0.0758613	0.12232	-0.620185	0.535136	0.886807	Age Unchanged
Vpreb3	13.337	0.0318886	0.548837	0.0581021	0.953667	0.99287	Age Unchanged
Nsun5	264.14	0.0289889	0.142039	0.204092	0.838282	0.97895	Age Unchanged
Gm38393	10.0788	-0.0771582	0.624099	-0.123631	0.901607	0.985542	Age Unchanged
Slc7a7	167.369	-0.0247199	0.160648	-0.153876	0.877707	0.983329	Age Unchanged
Oxa1l	771.899	0.127725	0.0956836	1.33487	0.18192	0.603274	Age Unchanged
Heatr6	429.015	-0.0092806	0.117862	-0.0787409	0.937239	0.990491	Age Unchanged
Ilf2	1030.93	0.00139062	0.0944644	0.0147211	0.988255	0.997911	Age Unchanged
Chtop	2391.37	-0.0904366	0.0692285	-1.30635	0.191434	0.617616	Age Unchanged
Snapin	1086.07	-0.0782569	0.0853347	-0.917058	0.359112	0.791506	Age Unchanged
S100a6	1202.04	-0.1089	0.125636	-0.866789	0.386058	0.812969	Age Unchanged
Icam2	328.246	0.177282	0.122766	1.44406	0.148723	0.551288	Age Unchanged
Epn2	1113.25	0.0175447	0.116481	0.150623	0.880273	0.983506	Age Unchanged
B9d1	181.454	-0.0633088	0.18903	-0.334914	0.73769	0.956233	Age Unchanged
Sec24b	1091.37	-0.0270684	0.102849	-0.263186	0.792407	0.969716	Age Unchanged
Rmnd5b	616.115	0.161441	0.105499	1.53026	0.125952	0.510446	Age Unchanged
Nhp2	380.351	-0.0457089	0.116499	-0.392355	0.694796	0.944938	Age Unchanged
Vps9d1	577.431	-0.123454	0.0992058	-1.24442	0.213345	0.646332	Age Unchanged
Zfp276	362.041	-0.173398	0.119858	-1.44669	0.147983	0.550145	Age Unchanged
Mfsd10	673.342	-0.0172672	0.116364	-0.14839	0.882035	0.983506	Age Unchanged
Luzp1	1111.99	-0.101292	0.0991549	-1.02155	0.306992	0.751693	Age Unchanged
Araf	2836.22	-0.0133776	0.0818956	-0.16335	0.870243	0.981628	Age Unchanged
Cnnm3	675.792	-0.0876159	0.109416	-0.800756	0.423273	0.834633	Age Unchanged
Lman2l	959.571	-0.130496	0.107935	-1.20902	0.226656	0.660962	Age Unchanged
Mcm3ap	809.225	0.0480426	0.0899949	0.533837	0.593455	0.910577	Age Unchanged
Pcnt	661.069	0.0937204	0.112683	0.831714	0.40557	0.824989	Age Unchanged
Mxd1	547.74	0.0592574	0.152914	0.387521	0.69837	0.945953	Age Unchanged
Snrnp27	401.073	0.0219734	0.122162	0.17987	0.857254	0.980717	Age Unchanged
Ocrl	724.144	0.0509208	0.100231	0.508035	0.611429	0.916158	Age Unchanged
Agpat3	2391	-0.0723302	0.072987	-0.991	0.321686	0.76319	Age Unchanged
Uhrf1	113.747	0.0393082	0.238223	0.165005	0.86894	0.981628	Age Unchanged
Ramp2	1650.2	0.0603853	0.133539	0.452194	0.651129	0.931141	Age Unchanged
Hpn	99.1856	0.0838658	0.225242	0.372336	0.709642	0.949	Age Unchanged
Ckb	11626.3	0.014567	0.0776758	0.187536	0.85124	0.979891	Age Unchanged
Sp1	976.613	-0.128384	0.0996546	-1.28829	0.197644	0.625375	Age Unchanged
Myg1	461.445	-0.0482559	0.120104	-0.401784	0.687843	0.942909	Age Unchanged
Pfdn5	1546.68	0.0196151	0.0901934	0.217478	0.827836	0.97731	Age Unchanged
Rrp15	183.882	0.0979504	0.153059	0.639954	0.522203	0.881638	Age Unchanged
Rnd2	298.467	-0.186984	0.12684	-1.47417	0.140436	0.537577	Age Unchanged
Fndc5	485.489	0.0418241	0.132163	0.316459	0.751654	0.959747	Age Unchanged
Fbxo9	949.569	-0.02759	0.09102	-0.30312	0.761799	0.961274	Age Unchanged
Vps50	384.369	0.0734802	0.122063	0.601984	0.547185	0.891993	Age Unchanged
Hars	825.005	-0.113638	0.0967249	-1.17486	0.240051	0.678177	Age Unchanged
Zmat2	1354.46	0.0731427	0.0936773	0.780794	0.434924	0.840276	Age Unchanged
Ube2c	59.6547	0.177916	0.281551	0.631913	0.527444	0.882653	Age Unchanged
Smg5	1380.79	-0.120305	0.0892854	-1.34742	0.177844	0.597529	Age Unchanged
Cct3	1765.7	-0.0621836	0.0787812	-0.78932	0.429925	0.837691	Age Unchanged
Col18a1	1392.39	-0.0356854	0.162652	-0.219398	0.82634	0.977255	Age Unchanged
Slc19a1	544.108	0.145229	0.12097	1.20053	0.229933	0.664058	Age Unchanged
Kpnb1	2765.38	-0.062543	0.0703668	-0.888813	0.374103	0.803024	Age Unchanged
Npepps	2026.18	-0.0967998	0.080857	-1.19717	0.231239	0.665826	Age Unchanged
Cyp51	380.429	0.035446	0.153513	0.230899	0.817393	0.974689	Age Unchanged
Tubb6	731.677	-0.189237	0.128658	-1.47085	0.14133	0.538118	Age Unchanged
Def8	888.573	0.010499	0.091436	0.114823	0.908585	0.986292	Age Unchanged
Meox1	178.309	-0.193506	0.164738	-1.17463	0.240144	0.678238	Age Unchanged
Sost	20.236	0.162511	0.674756	0.240844	0.809676	0.973118	Age Unchanged
Irx2	14.3919	0.171664	0.829327	0.206992	0.836016	0.97895	Age Unchanged
Sgca	24.7515	0.205249	0.401518	0.511181	0.609224	0.915373	Age Unchanged
Dlx3	34.8155	0.184642	0.363099	0.508517	0.611091	0.916067	Age Unchanged
Foxm1	97.0678	-0.144255	0.21066	-0.684774	0.493486	0.869231	Age Unchanged
Itfg2	448.656	-0.00557329	0.11407	-0.0488585	0.961032	0.99309	Age Unchanged
Gtf2h4	228.975	-0.0511777	0.147533	-0.34689	0.728674	0.955067	Age Unchanged
Nom1	495.537	0.0419463	0.110489	0.379643	0.704211	0.948098	Age Unchanged
Ergic1	2080.17	-0.0353949	0.0874499	-0.404745	0.685665	0.942742	Age Unchanged
Stk38l	371.111	0.0354629	0.117874	0.300854	0.763526	0.961769	Age Unchanged
Brpf1	1011.29	0.0606979	0.0870562	0.697226	0.485661	0.866993	Age Unchanged
Akr1b3	1351.71	0.0886779	0.0895618	0.990131	0.32211	0.763212	Age Unchanged
Gstt1	1030.85	0.000486908	0.127585	0.00381634	0.996955	0.999411	Age Unchanged
Gstt3	324.719	0.0311564	0.137963	0.225832	0.821332	0.976542	Age Unchanged
Ddx18	554.252	-0.0165304	0.105266	-0.157035	0.875217	0.982837	Age Unchanged
Ubl3	1286.3	-0.0479872	0.0924394	-0.519121	0.603676	0.913189	Age Unchanged
Gramd3	302.648	-0.121117	0.129451	-0.935621	0.349468	0.78594	Age Unchanged
Eef1e1	131.827	-0.184457	0.199953	-0.922503	0.356266	0.790476	Age Unchanged
Il16	226.535	0.23904	0.172761	1.38364	0.166468	0.581723	Age Unchanged
Coasy	536.738	0.0449104	0.104065	0.43156	0.666061	0.936162	Age Unchanged
Crnkl1	442.886	0.0229916	0.126945	0.181114	0.856278	0.980717	Age Unchanged
Chordc1	639.233	-0.178271	0.139259	-1.28014	0.200495	0.629018	Age Unchanged
Rtcb	1423.58	0.0363591	0.0780534	0.465823	0.641342	0.927518	Age Unchanged
Pwp1	290.787	-0.170429	0.13288	-1.28257	0.199642	0.627946	Age Unchanged
Fbxo7	392.556	0.190858	0.126718	1.50617	0.132024	0.520989	Age Unchanged
Capns1	3999.25	-0.033039	0.0655659	-0.503905	0.614328	0.917977	Age Unchanged
Folr1	987.076	0.0459203	0.235098	0.195324	0.845139	0.979317	Age Unchanged
Clpb	876.718	-0.0541144	0.0996291	-0.543159	0.58702	0.908011	Age Unchanged
2022-09-07	2553.8	-0.118728	0.0783435	-1.51548	0.129651	0.517187	Age Unchanged
Zdhhc4	707.276	0.110424	0.105183	1.04982	0.293801	0.737949	Age Unchanged
Rac1	2656.75	-0.0211848	0.0889788	-0.238088	0.811813	0.973118	Age Unchanged
Nup214	589.732	0.0245188	0.112294	0.218344	0.827161	0.97731	Age Unchanged
Aif1l	140.281	-0.0787683	0.310612	-0.25359	0.799812	0.971075	Age Unchanged
Cpa3	607.428	-0.0128341	0.148899	-0.0861934	0.931313	0.989497	Age Unchanged
Ugp2	585.445	-0.0522241	0.101435	-0.514852	0.606657	0.913817	Age Unchanged
Kcnh6	1876.42	-0.00538986	0.190614	-0.0282762	0.977442	0.99624	Age Unchanged
Trmt1	917.319	0.133052	0.0879252	1.51324	0.130218	0.517561	Age Unchanged
Esam	1161.9	0.154453	0.154961	0.996724	0.318898	0.761082	Age Unchanged
Spa17	38.9309	-0.173842	0.415471	-0.418421	0.67564	0.939264	Age Unchanged
Fam50a	640.692	0.00152703	0.0971492	0.0157184	0.987459	0.997911	Age Unchanged
Emd	776.59	0.106331	0.0993438	1.07033	0.28447	0.728515	Age Unchanged
Taco1	95.9056	0.0654593	0.219434	0.29831	0.765467	0.962243	Age Unchanged
Gria3	423.333	-0.139629	0.117206	-1.19131	0.233533	0.66882	Age Unchanged
Sipa1l2	785.137	-0.110413	0.113791	-0.970314	0.33189	0.770555	Age Unchanged
Ap4e1	175.984	0.204144	0.159511	1.27981	0.200612	0.629018	Age Unchanged
Blvra	293.29	0.123736	0.132525	0.933678	0.35047	0.78669	Age Unchanged
Idh3g	1994.99	0.0585309	0.0900149	0.650236	0.51554	0.877836	Age Unchanged
Pnck	776.762	0.0458106	0.162251	0.282344	0.77768	0.966409	Age Unchanged
Ssr4	1187.3	0.122038	0.0894834	1.36381	0.172628	0.591583	Age Unchanged
Bcap31	2228.22	-0.109336	0.0803623	-1.36053	0.173661	0.593311	Age Unchanged
Kmt2a	1508.61	0.0399583	0.0839331	0.476073	0.634022	0.924757	Age Unchanged
Ift46	755.273	0.055598	0.0903942	0.615061	0.538514	0.887853	Age Unchanged
Tmem25	230.948	0.0793936	0.178964	0.44363	0.65731	0.932988	Age Unchanged
Trappc6a	384.845	0.166768	0.129378	1.289	0.197399	0.625375	Age Unchanged
Supt6	2853.09	0.0140156	0.0710717	0.197203	0.843668	0.979284	Age Unchanged
Unc119	1884.79	-0.0162374	0.0792822	-0.204806	0.837724	0.97895	Age Unchanged
Rab34	1505.37	-0.0407903	0.0921817	-0.442499	0.658128	0.933131	Age Unchanged
Sdf2	1137.11	-0.0333017	0.08221	-0.405081	0.685418	0.942742	Age Unchanged
Ccne1	39.8373	0.159366	0.342432	0.465396	0.641648	0.92782	Age Unchanged
Bbc3	169.501	-0.221793	0.173834	-1.27589	0.201993	0.630761	Age Unchanged
Psmc3	1986.4	-0.0699	0.0864628	-0.80844	0.418837	0.832414	Age Unchanged
Acp2	1055.35	0.0174039	0.0824899	0.210982	0.832902	0.978821	Age Unchanged
Rapsn	44.6348	0.132048	0.304427	0.433761	0.664462	0.935224	Age Unchanged
Slc39a13	1372.66	-0.125627	0.118599	-1.05926	0.28948	0.733279	Age Unchanged
Stat6	2386.39	-0.0490677	0.0791976	-0.61956	0.535548	0.887104	Age Unchanged
Vrk3	495.304	0.14418	0.116817	1.23425	0.217111	0.649521	Age Unchanged
Smg9	454.365	0.0906493	0.127219	0.712547	0.476126	0.861227	Age Unchanged
Paxip1	537.054	0.0377927	0.107444	0.351745	0.72503	0.954342	Age Unchanged
Rmnd5a	1350.16	-0.0523602	0.0996614	-0.525381	0.599318	0.913021	Age Unchanged
Mov10	611.051	-0.0881597	0.114069	-0.772865	0.439602	0.841973	Age Unchanged
Ppm1j	50.7165	0.0859848	0.297252	0.289266	0.772378	0.964284	Age Unchanged
Rhoc	2211.71	-0.114526	0.0854129	-1.34085	0.17997	0.600827	Age Unchanged
Tead3	679.783	-0.129395	0.112131	-1.15396	0.248516	0.689523	Age Unchanged
Def6	291.674	-0.13938	0.139256	-1.00089	0.316878	0.760156	Age Unchanged
Metrn	304.689	-0.0531353	0.170749	-0.311189	0.755657	0.960347	Age Unchanged
Lmf1	345.907	-0.0508104	0.12137	-0.418641	0.675479	0.939264	Age Unchanged
Ciao3	403.277	0.0902931	0.117171	0.770607	0.44094	0.841973	Age Unchanged
Daxx	568.324	0.0375172	0.114244	0.328396	0.742612	0.957521	Age Unchanged
Cd320	253.317	-0.173167	0.150341	-1.15183	0.249392	0.689846	Age Unchanged
Ipo4	464.742	-0.168322	0.118913	-1.41551	0.156919	0.565076	Age Unchanged
Rec8	72.2571	0.208776	0.346604	0.602348	0.546942	0.891993	Age Unchanged
Gmpr2	102.353	-0.20274	0.243939	-0.83111	0.405911	0.825037	Age Unchanged
Mdp1	388.16	0.0300173	0.118598	0.253101	0.80019	0.971274	Age Unchanged
Dhrs1	1020.89	0.0169784	0.0905113	0.187583	0.851203	0.979891	Age Unchanged
Tmem161a	823.6	-0.0614517	0.0927781	-0.662351	0.507746	0.874985	Age Unchanged
Armc6	175.128	-0.119778	0.173564	-0.690108	0.490126	0.868331	Age Unchanged
Borcs8	356.006	-0.137403	0.122867	-1.11831	0.263433	0.706752	Age Unchanged
Slc25a42	502.813	-0.109832	0.112155	-0.979294	0.327435	0.766434	Age Unchanged
Snx9	1665.12	-0.108361	0.101379	-1.06887	0.28513	0.729355	Age Unchanged
Ranbp3	1592.89	-0.0194035	0.0738295	-0.262815	0.792693	0.969716	Age Unchanged
Ndufa11	270.905	-0.153025	0.158561	-0.965081	0.334504	0.772482	Age Unchanged
Braf	707.47	-0.00329412	0.0990208	-0.033267	0.973462	0.995794	Age Unchanged
Ndufb2	129.759	-0.189449	0.20485	-0.924819	0.35506	0.789341	Age Unchanged
Hltf	523.045	-0.0314785	0.114112	-0.275856	0.782659	0.96751	Age Unchanged
Prpf6	1520.02	0.0570233	0.0802535	0.710539	0.47737	0.861872	Age Unchanged
Rgs19	304.273	-0.0265191	0.154441	-0.171711	0.863665	0.980717	Age Unchanged
Abhd3	370.159	-0.114558	0.150219	-0.762606	0.445699	0.844059	Age Unchanged
Snrpd1	386.941	-0.0921039	0.133558	-0.689615	0.490436	0.868526	Age Unchanged
Tchp	351.675	-0.0480469	0.123513	-0.389003	0.697274	0.945744	Age Unchanged
Tiam1	413.996	-0.0145787	0.131979	-0.110462	0.912043	0.986953	Age Unchanged
Tsc2	2011.14	-0.0968534	0.0783612	-1.23599	0.216463	0.649346	Age Unchanged
Slc9a3r2	2083.16	0.0226387	0.118498	0.191047	0.848489	0.979854	Age Unchanged
Puf60	2307.13	-0.0551729	0.0686602	-0.803564	0.421649	0.833455	Age Unchanged
Uck1	806.167	-0.0584046	0.0937574	-0.622933	0.533329	0.88651	Age Unchanged
Mien1	61.2914	-0.198471	0.30581	-0.649003	0.516337	0.878182	Age Unchanged
Zfp40	131.057	0.108403	0.192724	0.562478	0.57379	0.904252	Age Unchanged
Pdcd2l	215.96	0.00139996	0.149435	0.00936832	0.992525	0.99843	Age Unchanged
Gtf2f1	1043.38	0.098003	0.0879163	1.11473	0.264966	0.708253	Age Unchanged
Clpp	887.908	0.0746715	0.0865791	0.862466	0.388431	0.814856	Age Unchanged
Alkbh7	251.847	-0.129202	0.147467	-0.876146	0.380951	0.808895	Age Unchanged
Pspn	6.80963	-0.245995	0.794352	-0.309681	0.756804	0.960475	Age Unchanged
Med6	257.999	-0.0597607	0.132602	-0.450675	0.652223	0.931369	Age Unchanged
Prkd1	138.44	-0.0592357	0.184011	-0.321914	0.747518	0.958829	Age Unchanged
Cse1l	782.424	-0.122346	0.11301	-1.08261	0.278983	0.723425	Age Unchanged
Naa20	554.642	-0.16982	0.122283	-1.38875	0.164909	0.578335	Age Unchanged
Plekha3	550.278	-0.0525987	0.129471	-0.406257	0.684554	0.94267	Age Unchanged
Baz1b	2751.76	0.0197349	0.075452	0.261555	0.793664	0.969716	Age Unchanged
Mrpl2	500.69	0.0980774	0.109705	0.894007	0.371318	0.800136	Age Unchanged
Mea1	489.909	-0.160446	0.135428	-1.18474	0.236122	0.671856	Age Unchanged
Tmem143	366.753	0.0598013	0.132853	0.450133	0.652615	0.931369	Age Unchanged
Ggct	85.6524	0.144299	0.226795	0.636252	0.524612	0.881803	Age Unchanged
Jag2	1195.64	0.115418	0.0908748	1.27008	0.204058	0.633163	Age Unchanged
Nudt14	293.033	-0.0173611	0.147367	-0.117809	0.906219	0.985745	Age Unchanged
Flii	3170.97	-0.0189216	0.0772245	-0.245021	0.80644	0.971942	Age Unchanged
Top3a	254.398	0.142522	0.134587	1.05896	0.28962	0.73334	Age Unchanged
Atg4d	396.118	-0.0601682	0.114606	-0.525001	0.599583	0.913021	Age Unchanged
Qtrt1	308.491	-0.0355168	0.126004	-0.281871	0.778042	0.966482	Age Unchanged
Hdgfl2	1422.71	-0.0148625	0.0922195	-0.161165	0.871964	0.981817	Age Unchanged
Chaf1a	140.631	0.0474522	0.190686	0.24885	0.803477	0.971487	Age Unchanged
Adprh	1255.32	-0.108725	0.0903886	-1.20286	0.229029	0.663701	Age Unchanged
Timmdc1	287.541	-0.123681	0.133597	-0.925776	0.354562	0.789178	Age Unchanged
Mcm2	321.003	0.0409303	0.191676	0.213539	0.830907	0.978077	Age Unchanged
Tpra1	1018.18	-0.0125199	0.10605	-0.118057	0.906023	0.985722	Age Unchanged
Nab1	850.659	-0.0258554	0.0992834	-0.26042	0.79454	0.969716	Age Unchanged
Adgre5	1048.78	-0.0304604	0.101373	-0.300479	0.763812	0.961841	Age Unchanged
Kcnn1	117.593	-0.215467	0.192951	-1.11669	0.264126	0.707544	Age Unchanged
Cd36	703.721	-0.0371319	0.0951489	-0.39025	0.696351	0.945211	Age Unchanged
Map2k7	944.132	-0.0563287	0.0906358	-0.621485	0.534281	0.886703	Age Unchanged
Timm44	822.665	0.113136	0.0909136	1.24443	0.213341	0.646332	Age Unchanged
Ap2a2	2217.07	-0.0718569	0.0854284	-0.841136	0.400272	0.822283	Age Unchanged
Pnkp	657.398	0.0945187	0.121562	0.777534	0.436844	0.84098	Age Unchanged
Bcam	2907.74	0.0221911	0.126726	0.175112	0.860992	0.980717	Age Unchanged
Clptm1	2774.51	0.00145963	0.0768422	0.0189951	0.984845	0.997666	Age Unchanged
Relb	438.589	0.0643197	0.118368	0.543389	0.586862	0.907995	Age Unchanged
Tomm40	543.538	-0.0893155	0.106523	-0.838463	0.401771	0.823338	Age Unchanged
Hbp1	481.829	0.0760196	0.112523	0.67559	0.499301	0.871243	Age Unchanged
Cdkn1b	1492.53	-0.0483083	0.0839618	-0.57536	0.565048	0.899991	Age Unchanged
Ap1m1	1177.02	0.0671682	0.0922212	0.728338	0.466407	0.856708	Age Unchanged
Rab8a	1120.31	-0.067034	0.0951185	-0.704742	0.480971	0.863636	Age Unchanged
Hmgn2	1700.61	-0.161572	0.115556	-1.39821	0.162049	0.57368	Age Unchanged
Fam32a	1356.72	0.00210027	0.0919289	0.0228467	0.981773	0.996679	Age Unchanged
Elf3	25.3678	0.0571134	0.490158	0.11652	0.90724	0.98618	Age Unchanged
Stard3nl	616.098	-0.0476726	0.109178	-0.436649	0.662366	0.934735	Age Unchanged
Stk11	2126.98	-0.0247436	0.0780974	-0.316831	0.751372	0.959688	Age Unchanged
Atp5d	2251.51	-0.106876	0.0813408	-1.31393	0.188869	0.613495	Age Unchanged
Ppp5c	1624.69	-0.0478441	0.0905531	-0.528354	0.597254	0.912619	Age Unchanged
Cdk12	526.565	-0.0922356	0.119811	-0.769843	0.441393	0.84223	Age Unchanged
Lipe	361.85	-0.073976	0.165226	-0.447726	0.654351	0.931851	Age Unchanged
Pafah1b2	1639.46	-0.0979128	0.101834	-0.961491	0.336305	0.774174	Age Unchanged
Cnot11	398.286	0.0901932	0.124112	0.726707	0.467405	0.856986	Age Unchanged
Sri	1622.1	-0.019462	0.0794047	-0.245099	0.80638	0.971942	Age Unchanged
Irf3	1337.9	0.0506795	0.0782875	0.647352	0.517404	0.879048	Age Unchanged
Bcl2l12	110.14	0.0348095	0.216341	0.160901	0.872171	0.981817	Age Unchanged
Zfp959	88.2508	0.0342646	0.261592	0.130985	0.895787	0.985291	Age Unchanged
Ebi3	35.3828	-0.0147369	0.379161	-0.0388672	0.968996	0.995095	Age Unchanged
Yju2	196.05	0.015427	0.154154	0.100075	0.920285	0.987867	Age Unchanged
Ranbp2	1156.01	0.0886176	0.0867637	1.02137	0.307081	0.751693	Age Unchanged
Edar	78.253	-0.0610907	0.247438	-0.246893	0.804991	0.971534	Age Unchanged
Abcf3	1099.83	0.0147497	0.0825387	0.178701	0.858173	0.980717	Age Unchanged
Eif2b5	787.666	-0.0332115	0.100439	-0.330663	0.740899	0.957188	Age Unchanged
Car11	563.257	-0.199333	0.167282	-1.1916	0.233419	0.66882	Age Unchanged
Dlgap1	119.82	-0.102289	0.28479	-0.359174	0.719465	0.952313	Age Unchanged
Mrpl4	826.997	-0.121201	0.0898277	-1.34926	0.177253	0.597236	Age Unchanged
Keap1	927.329	-0.0317429	0.0872494	-0.363818	0.715994	0.951513	Age Unchanged
Mob3a	547.712	-0.00447248	0.135629	-0.0329758	0.973694	0.995794	Age Unchanged
Cacnb3	432.843	-0.115659	0.142518	-0.811545	0.417053	0.831286	Age Unchanged
Ccdc65	62.0612	0.0179039	0.308923	0.0579558	0.953784	0.99287	Age Unchanged
Fkbp11	108.591	-0.13224	0.21264	-0.621895	0.534011	0.886703	Age Unchanged
Ddx23	2029.72	-0.0161304	0.0754851	-0.21369	0.830789	0.978077	Age Unchanged
Pld3	2575.83	-0.0641521	0.0928974	-0.690569	0.489836	0.868331	Age Unchanged
Rabac1	5042.22	0.0457649	0.0636778	0.718694	0.472329	0.858697	Age Unchanged
Etv3	675.738	-0.125545	0.105366	-1.19151	0.233454	0.66882	Age Unchanged
Elavl3	19.5331	0.18096	0.931651	0.194235	0.845992	0.979724	Age Unchanged
Rab3b	73.8364	-0.0706386	0.233662	-0.302311	0.762415	0.961398	Age Unchanged
Nosip	870.854	0.00481187	0.095621	0.0503223	0.959866	0.99297	Age Unchanged
Pih1d1	556.179	-0.0384969	0.103577	-0.371674	0.710136	0.949131	Age Unchanged
Rps11	1057.82	0.033883	0.0997698	0.339612	0.734149	0.955346	Age Unchanged
Supt5	2367.91	0.0271847	0.0739818	0.367452	0.713282	0.950511	Age Unchanged
Paf1	1486.14	0.0212796	0.0925168	0.230008	0.818085	0.97483	Age Unchanged
Timm50	537.548	-0.114234	0.113174	-1.00937	0.312797	0.756652	Age Unchanged
Med29	127.306	-0.129406	0.183944	-0.703504	0.481741	0.863881	Age Unchanged
Bicd1	118.663	0.246109	0.190548	1.29159	0.196499	0.624115	Age Unchanged
Ncstn	1731.41	-0.114536	0.115877	-0.988427	0.322943	0.763751	Age Unchanged
Phyhip	158.023	-0.0913089	0.284548	-0.320891	0.748293	0.958829	Age Unchanged
Crhr2	177.275	-0.038506	0.27109	-0.142041	0.887048	0.984336	Age Unchanged
Inmt	241.894	0.159211	0.236003	0.674613	0.499922	0.871474	Age Unchanged
Dusp3	1007.29	0.025347	0.0872323	0.290569	0.771381	0.964103	Age Unchanged
Slc25a1	712.284	-0.145392	0.108214	-1.34356	0.179091	0.599401	Age Unchanged
Dgcr6	638.338	0.161051	0.105152	1.53159	0.125623	0.510072	Age Unchanged
Ddr1	1711.68	-0.122739	0.136843	-0.896934	0.369754	0.799071	Age Unchanged
Fosb	85.6172	-0.0235789	0.371502	-0.0634692	0.949393	0.992557	Age Unchanged
Klc4	770.26	-0.0861583	0.0984659	-0.875007	0.38157	0.808895	Age Unchanged
Ercc1	319.245	0.0666131	0.144443	0.461174	0.644674	0.92912	Age Unchanged
As3mt	595.301	-0.0157574	0.109867	-0.143422	0.885957	0.984226	Age Unchanged
Homer3	444.391	-0.111202	0.113688	-0.978139	0.328006	0.76692	Age Unchanged
Crtc1	1153.12	-0.116737	0.0816782	-1.42924	0.152936	0.55854	Age Unchanged
Rnf215	855.706	-0.148272	0.0964359	-1.53752	0.124166	0.507011	Age Unchanged
Crot	558.674	-0.0691749	0.110547	-0.625752	0.531477	0.885346	Age Unchanged
Snrnp200	2159.68	0.100327	0.0809353	1.23959	0.215125	0.648423	Age Unchanged
Ciao1	656.286	0.0450233	0.114946	0.391692	0.695286	0.945077	Age Unchanged
Has1	13.2078	-0.0444873	0.560838	-0.079323	0.936776	0.990491	Age Unchanged
Taf6l	270.211	0.0108217	0.136674	0.0791787	0.936891	0.990491	Age Unchanged
Insig2	797.018	0.151879	0.154579	0.982536	0.325836	0.765652	Age Unchanged
Kpna6	1125.25	-0.0500644	0.0896232	-0.55861	0.576428	0.905161	Age Unchanged
Man1a	1779.22	0.0955707	0.0805817	1.18601	0.235618	0.671022	Age Unchanged
Itpkc	114.813	-0.135126	0.21195	-0.637536	0.523776	0.881701	Age Unchanged
Coq8b	353.772	0.0386841	0.124941	0.309619	0.756851	0.960475	Age Unchanged
Brd8	1180.85	0.0594406	0.0902276	0.658786	0.510033	0.875577	Age Unchanged
Farsa	802.642	-0.0596242	0.0879571	-0.677878	0.497849	0.871135	Age Unchanged
Gcdh	469.05	0.0427407	0.116423	0.367115	0.713533	0.950598	Age Unchanged
Mast2	1041.08	-0.0436098	0.132086	-0.330161	0.741278	0.957188	Age Unchanged
Syce2	58.5534	0.107299	0.284118	0.377656	0.705686	0.948098	Age Unchanged
Nfat5	2239.8	-0.0716697	0.0923049	-0.776445	0.437486	0.841179	Age Unchanged
Nob1	429.334	0.0768078	0.116537	0.659082	0.509843	0.875526	Age Unchanged
Ppfia3	327.809	-0.10474	0.13236	-0.791323	0.428756	0.837015	Age Unchanged
Gys1	403.622	-0.0162252	0.169091	-0.0959557	0.923556	0.988521	Age Unchanged
Ruvbl2	546.719	-0.124327	0.103617	-1.19987	0.230189	0.664284	Age Unchanged
Lin7b	23.199	-0.166808	0.443611	-0.376024	0.706899	0.948357	Age Unchanged
Tfam	398.428	0.123708	0.113271	1.09214	0.27477	0.718647	Age Unchanged
Zfp81	164.248	-0.0595467	0.174526	-0.34119	0.732961	0.955326	Age Unchanged
Efnb3	338.247	-0.12326	0.161179	-0.764744	0.444424	0.84368	Age Unchanged
Mmd	545.872	-0.195229	0.154289	-1.26535	0.205747	0.635955	Age Unchanged
Fam162a	533.852	-0.138305	0.120768	-1.14521	0.252123	0.691949	Age Unchanged
Rpl8	6428.65	0.0211674	0.0620463	0.341155	0.732987	0.955326	Age Unchanged
Ssbp2	525.781	0.136019	0.103919	1.3089	0.190568	0.615969	Age Unchanged
Fancl	94.9386	-0.138742	0.210362	-0.659536	0.509552	0.875222	Age Unchanged
Gstm5	665.051	-0.0328043	0.113281	-0.289584	0.772134	0.964176	Age Unchanged
Stat5a	463.256	-0.103399	0.128441	-0.80503	0.420802	0.833184	Age Unchanged
Dnaja3	721.259	0.0648778	0.0962067	0.674358	0.500083	0.871523	Age Unchanged
Hmox2	687.45	0.0315095	0.0934481	0.337187	0.735976	0.955732	Age Unchanged
Cdip1	1220.81	0.046096	0.0877515	0.525301	0.599374	0.913021	Age Unchanged
Map3k20	417.311	0.0646989	0.11297	0.57271	0.566841	0.901047	Age Unchanged
Cwc15	930.306	-0.0422065	0.0879121	-0.480098	0.631157	0.923996	Age Unchanged
Col5a3	701.969	-0.143596	0.177291	-0.809945	0.417972	0.832032	Age Unchanged
Dnmt1	1017.8	0.0691492	0.0872984	0.792102	0.428301	0.836992	Age Unchanged
Ppan	409.996	-0.0118657	0.1198	-0.0990457	0.921102	0.988162	Age Unchanged
Angptl2	1467.75	-0.148819	0.159055	-0.935647	0.349455	0.78594	Age Unchanged
Cacna1e	57.581	0.241357	0.305074	0.791143	0.428861	0.837055	Age Unchanged
Trmt10a	103.092	0.0450419	0.211393	0.213072	0.831271	0.978077	Age Unchanged
Etv1	117.501	0.14406	0.1994	0.722466	0.470008	0.858674	Age Unchanged
Kifc2	671.752	-0.113	0.110278	-1.02469	0.305511	0.750357	Age Unchanged
Psap	26718.1	-0.0239293	0.0931075	-0.257007	0.797174	0.97075	Age Unchanged
Ikbkg	569.449	0.0179727	0.117808	0.152559	0.878746	0.98348	Age Unchanged
Wars2	152.189	-0.193025	0.169447	-1.13915	0.254641	0.695184	Age Unchanged
Atn1	223.683	-0.209261	0.148842	-1.40593	0.159744	0.569492	Age Unchanged
Phb2	1022.48	-0.0773551	0.084666	-0.91365	0.360901	0.791658	Age Unchanged
Eno2	1619.64	-0.0121388	0.104513	-0.116146	0.907537	0.986237	Age Unchanged
Emg1	623.699	-0.0842931	0.104359	-0.807723	0.41925	0.832573	Age Unchanged
Lpcat3	671.367	-0.0226546	0.11247	-0.201429	0.840363	0.97895	Age Unchanged
Atp6v1f	1237.65	-0.0225524	0.0842665	-0.267632	0.788983	0.968964	Age Unchanged
Clcn5	181.428	0.0671323	0.179477	0.374043	0.708372	0.948759	Age Unchanged
Clcn3	885.411	0.073401	0.113117	0.648893	0.516408	0.878182	Age Unchanged
Utp20	293.927	0.130334	0.128772	1.01213	0.311476	0.755189	Age Unchanged
X9330159F19Rik	173.675	0.118739	0.186684	0.636045	0.524747	0.881803	Age Unchanged
Cul3	1343.7	0.0477483	0.0865869	0.551449	0.581326	0.905943	Age Unchanged
Il11	15.0024	-0.227753	0.527769	-0.431538	0.666077	0.936162	Age Unchanged
Large1	861.571	-0.123355	0.0878517	-1.40413	0.160281	0.570287	Age Unchanged
Ddx56	484.234	0.0813487	0.10968	0.741695	0.458272	0.851299	Age Unchanged
Tmed4	1723.78	0.0467779	0.082769	0.565162	0.571963	0.903143	Age Unchanged
Col26a1	72.0347	-0.223838	0.247537	-0.904258	0.365858	0.795742	Age Unchanged
Ralb	789.877	0.019459	0.123123	0.158046	0.874421	0.982667	Age Unchanged
Ppp1cc	2352.19	-0.151145	0.111548	-1.35498	0.175424	0.59522	Age Unchanged
Tbccd1	272.115	0.0628112	0.142534	0.440675	0.659448	0.933937	Age Unchanged
Zfp324	193.626	-0.132859	0.186915	-0.710801	0.477207	0.861872	Age Unchanged
Coro1c	932.51	0.156992	0.136932	1.14649	0.251592	0.691544	Age Unchanged
Tax1bp1	2806.6	0.0633379	0.0692113	0.915137	0.36012	0.791658	Age Unchanged
Ndrg2	3971.88	0.11513	0.106577	1.08025	0.28003	0.724256	Age Unchanged
Pnpla6	1272.22	0.100398	0.0958522	1.04742	0.294905	0.739409	Age Unchanged
Mcoln1	1206.14	0.124349	0.0938951	1.32434	0.185389	0.607993	Age Unchanged
Arhgef18	1305.79	0.0112618	0.0895135	0.125812	0.899881	0.985484	Age Unchanged
Pkn2	672.03	-0.127446	0.0994392	-1.28165	0.199965	0.628443	Age Unchanged
Etfb	34.6014	-0.0355968	0.33621	-0.105877	0.91568	0.987001	Age Unchanged
Slbp	303.768	-0.0140737	0.127284	-0.110569	0.911958	0.986953	Age Unchanged
Arid3b	284.38	0.00424832	0.152266	0.0279007	0.977741	0.99624	Age Unchanged
Polr2e	914	0.0109992	0.0930877	0.11816	0.905941	0.985722	Age Unchanged
Myo9b	1765.07	0.0313339	0.0836807	0.374446	0.708073	0.948609	Age Unchanged
Hdac9	210.801	-0.0726838	0.201386	-0.360919	0.71816	0.9521	Age Unchanged
Adgre1	1105.76	-0.0285708	0.121213	-0.235708	0.813659	0.973663	Age Unchanged
Rab23	450.483	-0.0368361	0.109527	-0.33632	0.73663	0.955975	Age Unchanged
Rab11a	763.886	-0.0396913	0.102351	-0.387796	0.698167	0.945941	Age Unchanged
Dlst	1850.18	0.0164506	0.087588	0.187818	0.85102	0.979891	Age Unchanged
Dgkq	418.234	-0.101231	0.111138	-0.910858	0.36237	0.792591	Age Unchanged
Ap1s1	688.631	-0.103183	0.105493	-0.978099	0.328025	0.76692	Age Unchanged
Srpk1	841.9	0.105092	0.0931709	1.12795	0.259343	0.701553	Age Unchanged
Pax3	103.462	-0.0462073	0.216021	-0.213901	0.830624	0.978077	Age Unchanged
Lbr	668.495	0.0998882	0.113815	0.877639	0.38014	0.808414	Age Unchanged
Crabp2	285.051	0.0296101	0.223715	0.132356	0.894703	0.985196	Age Unchanged
Nes	649.585	0.0470944	0.11179	0.421277	0.673553	0.938687	Age Unchanged
Hapln2	9.53104	0.235168	0.649797	0.361909	0.71742	0.9519	Age Unchanged
Rrnad1	655.392	-0.150749	0.104252	-1.446	0.148176	0.55034	Age Unchanged
Pias4	566.69	-0.128446	0.101631	-1.26385	0.206283	0.636377	Age Unchanged
Map2k1	1366.7	-0.0884608	0.0783028	-1.12973	0.258592	0.700951	Age Unchanged
Sgta	1713.22	-0.110379	0.0730744	-1.51051	0.130914	0.51873	Age Unchanged
Tmem242	776.38	-0.0823002	0.101322	-0.812267	0.416638	0.831241	Age Unchanged
Dtx2	339.577	-0.0403648	0.165416	-0.24402	0.807215	0.972126	Age Unchanged
Hspb1	1084.3	-0.0501834	0.179271	-0.27993	0.779531	0.966631	Age Unchanged
Hnrnpa2b1	8750.29	-0.114864	0.0873106	-1.31558	0.188314	0.61263	Age Unchanged
Ccdc130	227.818	0.112581	0.143134	0.78654	0.431551	0.837691	Age Unchanged
Mri1	338.741	0.0537888	0.12561	0.428219	0.668492	0.93734	Age Unchanged
Prkacb	1983.5	-0.0901632	0.0806623	-1.11779	0.263658	0.706752	Age Unchanged
Sgsh	325.581	0.0962068	0.153037	0.628652	0.529577	0.884292	Age Unchanged
Cstb	647.391	0.0129906	0.128282	0.101266	0.91934	0.987867	Age Unchanged
Pex5	1096.36	-0.100099	0.0870798	-1.14951	0.250344	0.690751	Age Unchanged
Jkamp	686.424	-0.137329	0.0977376	-1.40508	0.159999	0.569708	Age Unchanged
Slc1a2	481.198	0.0842619	0.127758	0.659544	0.509547	0.875222	Age Unchanged
Eif2ak4	377.607	-0.00035251	0.115036	-0.00306434	0.997555	0.999473	Age Unchanged
Wdr1	2913.02	-0.0802423	0.0648544	-1.23727	0.215988	0.64895	Age Unchanged
Slc2a9	76.5633	0.209977	0.256158	0.819718	0.412377	0.828554	Age Unchanged
Ccn4	618.254	-0.137769	0.154852	-0.889679	0.373638	0.802632	Age Unchanged
Man2b1	2847.69	0.0901333	0.101589	0.887238	0.374951	0.803875	Age Unchanged
Wdr83	408.54	-0.00283101	0.117842	-0.0240238	0.980834	0.996568	Age Unchanged
Prdx2	2430.39	-0.138946	0.0957107	-1.45173	0.146576	0.547668	Age Unchanged
Polr2a	3161.68	-0.011555	0.108708	-0.106293	0.91535	0.986953	Age Unchanged
Senp3	1456.29	-0.0363167	0.0789212	-0.460165	0.645398	0.929132	Age Unchanged
Plekha8	193.418	-0.217255	0.185659	-1.17018	0.241928	0.680339	Age Unchanged
Dnah2	246.061	-0.0851553	0.217239	-0.391989	0.695066	0.944938	Age Unchanged
Ripk4	98.7422	0.114854	0.256051	0.44856	0.653749	0.931851	Age Unchanged
Ufd1	780.832	0.053484	0.0909364	0.588147	0.556434	0.895846	Age Unchanged
Zfp287	150.227	-0.0277127	0.194151	-0.142738	0.886497	0.984272	Age Unchanged
Letm1	1265.38	0.00639407	0.105398	0.060666	0.951625	0.992696	Age Unchanged
Ubqln1	1558.63	-0.0688646	0.0871979	-0.789751	0.429673	0.837641	Age Unchanged
Cadm3	3412.29	-0.114719	0.171654	-0.668315	0.503932	0.873484	Age Unchanged
Txn2	1202.5	-0.100018	0.092651	-1.07951	0.280361	0.724719	Age Unchanged
Crbn	443.301	0.0972947	0.125591	0.774693	0.438521	0.841973	Age Unchanged
Msh6	401.918	-0.072725	0.113834	-0.638868	0.522909	0.881638	Age Unchanged
Fbxo11	1082.96	0.0382455	0.094905	0.402987	0.686958	0.942909	Age Unchanged
Mlxipl	133.709	-0.00209894	0.186528	-0.0112527	0.991022	0.99843	Age Unchanged
Bud23	466.47	-0.166676	0.111769	-1.49124	0.135898	0.528078	Age Unchanged
Mcm5	186.959	0.202469	0.227355	0.890544	0.373174	0.802188	Age Unchanged
Il27ra	79.1276	0.0714624	0.232208	0.307751	0.758272	0.960475	Age Unchanged
Ddx39	419.945	0.165055	0.111642	1.47843	0.139292	0.535375	Age Unchanged
Usp40	447.722	-0.0394829	0.108831	-0.362793	0.71676	0.951513	Age Unchanged
Kbtbd4	102.887	0.164795	0.222597	0.740326	0.459102	0.851808	Age Unchanged
Celf1	1902.8	-0.0643265	0.0773632	-0.831487	0.405699	0.825037	Age Unchanged
Ndufs3	883.311	0.0283833	0.0863678	0.328632	0.742434	0.957521	Age Unchanged
Por	3533.56	0.0365436	0.164528	0.222112	0.824227	0.976807	Age Unchanged
Atp4a	49.0842	-0.0700891	0.31828	-0.220212	0.825706	0.977111	Age Unchanged
Ctr9	1057.33	-0.0853519	0.0922957	-0.924766	0.355087	0.789341	Age Unchanged
Eif4g2	9223.8	-0.101571	0.0784806	-1.29422	0.19559	0.622595	Age Unchanged
Mrvi1	821.953	-0.178747	0.154207	-1.15913	0.246401	0.685851	Age Unchanged
Pcyt1a	1067.09	-0.0700849	0.082071	-0.853955	0.39313	0.818423	Age Unchanged
Zfp592	944.323	-0.141715	0.106406	-1.33184	0.182913	0.604658	Age Unchanged
Psmd4	1328.82	0.0661406	0.0968349	0.683025	0.494591	0.869359	Age Unchanged
Insrr	140.227	-0.242807	0.746391	-0.325308	0.744948	0.958149	Age Unchanged
Cabp5	596.305	0.0671772	0.196232	0.342335	0.732099	0.955326	Age Unchanged
Snx6	936.599	-0.101126	0.0918146	-1.10141	0.270717	0.714715	Age Unchanged
Mthfd2	157.223	-0.121326	0.187162	-0.648242	0.516828	0.878461	Age Unchanged
Kit	461.454	0.20371	0.149116	1.36611	0.171903	0.59048	Age Unchanged
Tomm40l	134.581	-0.0848334	0.177823	-0.477067	0.633315	0.924323	Age Unchanged
Cs	2033.88	-0.0478541	0.0709262	-0.674702	0.499865	0.871474	Age Unchanged
Bcas2	899.268	-0.124333	0.0964147	-1.28957	0.197201	0.625108	Age Unchanged
Ctcf	1230.84	-0.0994401	0.0807924	-1.23081	0.218394	0.650235	Age Unchanged
Ranbp1	238.192	-0.202189	0.150004	-1.34789	0.177694	0.597529	Age Unchanged
Rfx5	361.477	0.059822	0.145556	0.410989	0.681081	0.941171	Age Unchanged
Psmb4	2181.51	-0.0539398	0.0685973	-0.786326	0.431676	0.837691	Age Unchanged
Slc30a4	543.606	-0.0361744	0.132974	-0.272041	0.78559	0.968193	Age Unchanged
Bloc1s6	402.582	0.00596015	0.117976	0.0505199	0.959708	0.99297	Age Unchanged
Metap1	560.915	-0.0784035	0.104131	-0.752929	0.451493	0.847946	Age Unchanged
Gpr108	1351.07	-0.0958586	0.0799246	-1.19936	0.230387	0.664361	Age Unchanged
Rsl1d1	766.816	0.103123	0.0894305	1.15311	0.248866	0.689802	Age Unchanged
Cnga2	34.6197	0.0793866	1.24057	0.0639918	0.948977	0.992557	Age Unchanged
Apc	876.834	0.11665	0.11252	1.0367	0.299874	0.744841	Age Unchanged
Uqcc1	558.773	0.0933393	0.100387	0.929795	0.352477	0.788134	Age Unchanged
Ncoa2	600.812	-0.0385282	0.102152	-0.377164	0.706052	0.948098	Age Unchanged
Nr2c2	144.785	0.102909	0.174506	0.589715	0.555382	0.895753	Age Unchanged
Nr2c1	279.464	-0.0787257	0.128857	-0.610954	0.54123	0.889292	Age Unchanged
Smpd4	647.234	-0.105447	0.101364	-1.04029	0.298207	0.74314	Age Unchanged
Pex1	174.854	0.059173	0.160994	0.367547	0.713211	0.950511	Age Unchanged
Otx1	111.258	-0.218149	0.257904	-0.845853	0.397635	0.821355	Age Unchanged
Kctd20	1207.21	-0.0763671	0.106237	-0.718837	0.472242	0.858697	Age Unchanged
Ctns	556.187	0.188535	0.127847	1.47469	0.140296	0.537391	Age Unchanged
Shpk	267.938	-0.0372921	0.165263	-0.225653	0.821472	0.976554	Age Unchanged
Tuft1	204.267	0.0864089	0.167648	0.515417	0.606262	0.913663	Age Unchanged
Dnase1	27.7664	0.118739	0.379661	0.312751	0.75447	0.959918	Age Unchanged
Trap1	1065.72	0.0262003	0.0855911	0.30611	0.759521	0.960647	Age Unchanged
X1700037C18Rik	70.2222	-0.153031	0.259737	-0.589177	0.555742	0.895846	Age Unchanged
Ankrd13d	241.626	0.148306	0.155144	0.955924	0.339111	0.77624	Age Unchanged
Tpr	1839.13	0.0390516	0.0712268	0.548272	0.583505	0.906878	Age Unchanged
Odr4	806.174	0.00122226	0.0913345	0.0133822	0.989323	0.998013	Age Unchanged
Dhx34	527.861	0.0531708	0.10509	0.505956	0.612888	0.916975	Age Unchanged
Kptn	297.085	-0.175085	0.155171	-1.12834	0.259178	0.701455	Age Unchanged
Napa	2384.55	-0.0519684	0.0697799	-0.744747	0.456424	0.849734	Age Unchanged
Sra1	825.012	-0.094785	0.096043	-0.986902	0.323691	0.76459	Age Unchanged
Atp5g1	1566.4	-0.092797	0.118418	-0.783639	0.433252	0.838722	Age Unchanged
Snf8	534.293	0.00323031	0.105834	0.0305223	0.975651	0.995858	Age Unchanged
Tbcb	803.332	-0.019524	0.0879239	-0.222056	0.82427	0.976807	Age Unchanged
Upk3bl	33.9869	0.0822774	0.367526	0.223868	0.82286	0.976731	Age Unchanged
Clint1	1972.23	0.0762694	0.125319	0.608602	0.542788	0.889937	Age Unchanged
Cdkal1	162.565	-0.0270179	0.163539	-0.165207	0.868781	0.981628	Age Unchanged
Cdcp3	92.1658	-0.116514	0.301849	-0.386003	0.699495	0.946343	Age Unchanged
Zbtb17	499.529	0.0926235	0.113424	0.816615	0.414149	0.829958	Age Unchanged
Fblim1	469.943	0.0534899	0.195648	0.273398	0.784547	0.968193	Age Unchanged
Epor	99.8603	0.179434	0.265986	0.674602	0.499929	0.871474	Age Unchanged
Mob1b	411.279	0.0984374	0.129533	0.759943	0.447288	0.845608	Age Unchanged
Atp6v1b2	3895.72	0.118049	0.092892	1.27082	0.203794	0.632833	Age Unchanged
Eps15l1	1033.26	-0.0394261	0.0975753	-0.404058	0.68617	0.942821	Age Unchanged
Tep1	658.472	-0.00436959	0.119793	-0.0364761	0.970903	0.995367	Age Unchanged
Ttc5	816.2	-0.0401383	0.0970199	-0.413712	0.679085	0.940575	Age Unchanged
Osgep	465.947	-0.144607	0.118906	-1.21615	0.223929	0.657575	Age Unchanged
Aamp	1743.27	-0.122593	0.087158	-1.40656	0.159558	0.569308	Age Unchanged
Tmbim1	1632.59	0.0744665	0.0980693	0.759325	0.447658	0.845751	Age Unchanged
Arpc2	2932.34	0.0925719	0.0730534	1.26718	0.205091	0.635128	Age Unchanged
Kmt2b	1700.39	0.00426743	0.0875073	0.0487666	0.961105	0.99309	Age Unchanged
Tmem147	969.242	-0.0105003	0.0984244	-0.106684	0.91504	0.986953	Age Unchanged
Rps9	5756.09	0.0435387	0.0673587	0.646372	0.518039	0.879577	Age Unchanged
Tfpt	307.785	0.051167	0.126665	0.403955	0.686246	0.942821	Age Unchanged
Susd2	305.729	-0.0512702	0.168908	-0.303539	0.761479	0.961062	Age Unchanged
Ggt5	262.324	0.0975247	0.141531	0.68907	0.490779	0.868615	Age Unchanged
Ggt1	25.3956	0.237637	0.501841	0.473531	0.635835	0.925182	Age Unchanged
Crip2	1397.93	-0.0104669	0.12058	-0.0868046	0.930827	0.989403	Age Unchanged
Crip1	755.446	-0.0322817	0.107662	-0.299844	0.764296	0.961859	Age Unchanged
Cbfa2t3	547.511	-0.117952	0.124694	-0.945931	0.344184	0.781226	Age Unchanged
Gcat	12.9941	-0.0162335	0.542168	-0.0299419	0.976113	0.996126	Age Unchanged
Tek	1281.43	0.0287218	0.102415	0.280444	0.779137	0.966537	Age Unchanged
Elovl1	881.716	-0.0379708	0.0936639	-0.405394	0.685188	0.942726	Age Unchanged
Med8	339.959	0.0879618	0.131373	0.669559	0.503139	0.873183	Age Unchanged
Hyi	445.343	-0.109108	0.11222	-0.972273	0.330915	0.769363	Age Unchanged
Nectin4	80.6606	0.191044	0.240481	0.794426	0.426947	0.83669	Age Unchanged
Pfdn2	551.844	-0.0067126	0.105404	-0.0636846	0.949221	0.992557	Age Unchanged
Rnf114	1113.4	0.118687	0.0864646	1.37267	0.169855	0.587039	Age Unchanged
C330007P06Rik	650.418	-0.0883933	0.127906	-0.69108	0.489515	0.868326	Age Unchanged
Rbm14	244.256	-0.223161	0.154024	-1.44888	0.147372	0.549053	Age Unchanged
Zdhhc24	609.798	0.0639963	0.103982	0.615458	0.538252	0.887729	Age Unchanged
Bbs1	686.271	-0.123124	0.130626	-0.942565	0.345903	0.783042	Age Unchanged
Ndor1	138.156	0.145054	0.203948	0.711228	0.476943	0.861865	Age Unchanged
Ptbp1	2041.23	-0.0642842	0.078301	-0.820989	0.411653	0.828171	Age Unchanged
Mvd	155.417	0.0336845	0.192147	0.175306	0.860839	0.980717	Age Unchanged
Sfmbt1	390.173	0.0607769	0.119381	0.509102	0.610681	0.915863	Age Unchanged
Atp7b	39.9854	0.219886	0.365338	0.601871	0.54726	0.891993	Age Unchanged
Rundc3a	547.302	0.167397	0.120868	1.38496	0.166065	0.580999	Age Unchanged
Slc4a3	1162.04	-0.0243295	0.116696	-0.208485	0.83485	0.97895	Age Unchanged
Runx1t1	181.609	-0.092985	0.166492	-0.558496	0.576506	0.905161	Age Unchanged
Aprt	599.603	-0.0383734	0.107134	-0.358183	0.720207	0.952313	Age Unchanged
Gtf2h1	527.606	0.0170363	0.107978	0.157777	0.874633	0.982715	Age Unchanged
Hfe	1117.12	-0.0953236	0.107749	-0.884683	0.376328	0.805288	Age Unchanged
Abhd1	6.38192	-0.0473398	0.786536	-0.0601877	0.952006	0.992696	Age Unchanged
Slc5a6	3106.93	0.101693	0.10431	0.974905	0.329607	0.768554	Age Unchanged
Aplp1	3173.88	-0.0641072	0.103278	-0.620724	0.534781	0.886703	Age Unchanged
Qrich1	954.438	0.0689021	0.0911753	0.75571	0.449823	0.846727	Age Unchanged
P4htm	560.149	-0.0295033	0.127761	-0.230927	0.817372	0.974689	Age Unchanged
Usp19	3725.27	-0.0833559	0.081891	-1.01789	0.308731	0.753073	Age Unchanged
Pola1	124.943	-0.0499172	0.190483	-0.262055	0.793279	0.969716	Age Unchanged
Cdc42	4949.02	-0.0491993	0.0637795	-0.771397	0.440471	0.841973	Age Unchanged
Pknox1	272.93	-0.178161	0.14437	-1.23406	0.21718	0.649521	Age Unchanged
D130043K22Rik	14.5983	-0.18619	0.508862	-0.365896	0.714443	0.95114	Age Unchanged
Acot13	326.112	0.0214132	0.127937	0.167373	0.867076	0.981122	Age Unchanged
Zfp184	28.692	0.0277691	0.386506	0.0718464	0.942724	0.991185	Age Unchanged
B4galnt1	336.071	0.216578	0.236753	0.914786	0.360304	0.791658	Age Unchanged
Mettl1	273.681	-0.100272	0.134733	-0.744226	0.45674	0.849972	Age Unchanged
Tspan31	962.401	-0.139914	0.0952224	-1.46933	0.141742	0.538818	Age Unchanged
Kif5b	1621.87	0.0160652	0.0812759	0.197663	0.843309	0.979221	Age Unchanged
Saal1	318.411	0.00445596	0.140625	0.0316868	0.974722	0.995858	Age Unchanged
Krt23	17.2644	0.0678049	0.621187	0.109154	0.913081	0.986953	Age Unchanged
Cnp	994.832	-0.0153785	0.133798	-0.114938	0.908494	0.986292	Age Unchanged
Ttc25	98.3087	0.246877	0.244456	1.0099	0.312541	0.756223	Age Unchanged
Sod2	1075.97	0.0380959	0.0914666	0.416501	0.677043	0.939919	Age Unchanged
Tmco6	242.323	0.0273737	0.161675	0.169313	0.86555	0.980853	Age Unchanged
Stambp	333.508	0.0235916	0.134762	0.175062	0.861031	0.980717	Age Unchanged
P3h4	1455.58	-0.10285	0.103157	-0.997025	0.318752	0.761082	Age Unchanged
Eif1b	800.654	-0.0710771	0.0949598	-0.748497	0.454161	0.849238	Age Unchanged
Chrd	343.703	0.0177217	0.172104	0.102971	0.917986	0.987867	Age Unchanged
Psmd2	3005.5	0.00562986	0.076115	0.0739653	0.941038	0.991185	Age Unchanged
Vars	1309.26	0.168284	0.118229	1.42338	0.154627	0.561702	Age Unchanged
Msh5	49.3555	0.143115	0.285998	0.500404	0.616791	0.919207	Age Unchanged
Abhd16a	1791.26	-0.0852543	0.0752694	-1.13266	0.257359	0.699299	Age Unchanged
Neu1	779.336	0.0535588	0.118325	0.452641	0.650807	0.931106	Age Unchanged
Clic1	1867.69	0.104447	0.0929644	1.12351	0.261219	0.704568	Age Unchanged
Lsm2	146.56	0.0892971	0.181342	0.492424	0.62242	0.92068	Age Unchanged
Casq1	70.9806	-0.132377	0.2721	-0.486503	0.626611	0.922948	Age Unchanged
Zfp775	155.626	0.210265	0.178559	1.17757	0.238969	0.676523	Age Unchanged
Mrpl49	773.253	0.0753143	0.0977831	0.770218	0.44117	0.841973	Age Unchanged
Dennd2c	115.862	-0.157541	0.194546	-0.80979	0.418061	0.832044	Age Unchanged
Mark3	1132.34	-0.0088434	0.114227	-0.0774197	0.93829	0.990491	Age Unchanged
Gatad1	720.436	-0.0518696	0.11292	-0.459348	0.645984	0.929297	Age Unchanged
M6pr	2526.25	-0.00913436	0.0770256	-0.118589	0.905601	0.985684	Age Unchanged
Lrrc8a	209.791	-0.100681	0.20408	-0.493343	0.621771	0.920298	Age Unchanged
Fance	575.378	0.00212956	0.103424	0.0205905	0.983572	0.997066	Age Unchanged
Tinf2	289.242	0.109144	0.130064	0.83916	0.40138	0.82305	Age Unchanged
Tssk4	18.0294	0.245201	0.474701	0.516537	0.605479	0.913663	Age Unchanged
Dus3l	1396.97	0.0230253	0.0887044	0.259573	0.795193	0.969716	Age Unchanged
Homer1	145.514	0.140895	0.171829	0.819973	0.412231	0.828554	Age Unchanged
Rad51c	69.0711	0.195461	0.272766	0.716589	0.473628	0.859273	Age Unchanged
Cav1	1852.83	-0.0354159	0.084721	-0.41803	0.675925	0.939264	Age Unchanged
Arpp19	869.538	-0.0925927	0.0888886	-1.04167	0.297564	0.741829	Age Unchanged
Bcl2l1	1414.29	0.0393831	0.0971113	0.405546	0.685076	0.942726	Age Unchanged
Cct4	1570.57	-0.0270281	0.0828595	-0.326192	0.744279	0.958065	Age Unchanged
X0610009B22Rik	223.978	-0.065138	0.152269	-0.427782	0.66881	0.937376	Age Unchanged
Cpt1c	764.018	-0.0995266	0.117852	-0.844508	0.398386	0.821463	Age Unchanged
Zfp655	347.2	-0.149496	0.134031	-1.11538	0.264686	0.708034	Age Unchanged
Zmiz1	2591.45	-0.0893111	0.151948	-0.587775	0.556684	0.895957	Age Unchanged
Ankrd26	210.229	-0.217146	0.18966	-1.14493	0.25224	0.692099	Age Unchanged
Aldh16a1	432.204	0.119199	0.119859	0.994495	0.319982	0.762136	Age Unchanged
Prrg2	285.051	0.0270483	0.132837	0.203619	0.838651	0.97895	Age Unchanged
Hnrnph1	5208.4	-0.07723	0.0845848	-0.913048	0.361217	0.79185	Age Unchanged
Ift43	324.972	-0.0569618	0.145748	-0.390823	0.695928	0.945211	Age Unchanged
Id3	5175.81	-0.107628	0.0813905	-1.32236	0.186047	0.60938	Age Unchanged
Ctsd	6252.45	-0.0285872	0.0931293	-0.306962	0.758872	0.960475	Age Unchanged
Rplp1	5853.97	0.00821982	0.0602136	0.136511	0.891417	0.984943	Age Unchanged
Hmgcll1	112.264	-0.189123	0.22511	-0.840136	0.400832	0.822547	Age Unchanged
Ift22	559.673	-0.119414	0.120978	-0.987075	0.323606	0.76459	Age Unchanged
Fzd3	265.245	-0.0316237	0.144303	-0.219148	0.826535	0.97731	Age Unchanged
Ap2s1	1103.16	-0.122109	0.0893181	-1.36712	0.171587	0.590069	Age Unchanged
Fhl2	631.628	0.166134	0.121364	1.36889	0.171035	0.58973	Age Unchanged
Clstn3	2465.45	-0.132081	0.164641	-0.802235	0.422417	0.83406	Age Unchanged
Fbxw9	304.854	-0.0697221	0.13285	-0.524816	0.599711	0.913021	Age Unchanged
Spib	98.4034	-0.18451	0.218682	-0.843734	0.398818	0.821595	Age Unchanged
Cers4	1094.75	-0.00287166	0.123424	-0.0232666	0.981438	0.996651	Age Unchanged
Scrn3	358.71	-0.04581	0.12582	-0.364092	0.71579	0.951513	Age Unchanged
Phax	543.894	0.0424563	0.109639	0.387239	0.698579	0.946035	Age Unchanged
Tle1	606.545	0.0833967	0.139063	0.599706	0.548702	0.892463	Age Unchanged
X1700109H08Rik	22.6398	0.0380844	0.490002	0.077723	0.938048	0.990491	Age Unchanged
Snrpb2	358.476	-0.0519149	0.118697	-0.437373	0.661841	0.934396	Age Unchanged
Ubc	1889.94	0.0235258	0.120264	0.195618	0.844909	0.979317	Age Unchanged
Prpf31	522.275	0.0469692	0.105303	0.446037	0.65557	0.93212	Age Unchanged
Sertad1	379.744	-0.174347	0.180683	-0.964935	0.334578	0.772482	Age Unchanged
Carhsp1	720.61	0.231439	0.185431	1.24812	0.211988	0.644448	Age Unchanged
Elk3	1135.83	-0.039742	0.08239	-0.482365	0.629547	0.923944	Age Unchanged
Herpud2	1012.29	-0.159874	0.129398	-1.23553	0.216634	0.649346	Age Unchanged
Rdh13	344.139	0.116529	0.138205	0.843159	0.399139	0.821937	Age Unchanged
Nutf2	370.645	-0.0320773	0.134558	-0.23839	0.811579	0.973118	Age Unchanged
Arpc5	1865.65	0.0138021	0.0756948	0.182338	0.855317	0.980526	Age Unchanged
Nfib	3022.78	-0.0938432	0.086464	-1.08534	0.277769	0.72241	Age Unchanged
Ubqln4	887.017	-0.0999305	0.0876941	-1.13954	0.25448	0.695156	Age Unchanged
Rbfox1	30.8418	-0.165053	0.375567	-0.439477	0.660316	0.934191	Age Unchanged
Rps18	3946.02	0.0475549	0.0635726	0.748041	0.454435	0.849238	Age Unchanged
Rpl10	5529.84	-0.0414043	0.0645003	-0.641924	0.520922	0.881036	Age Unchanged
Rps15a	2027.08	0.0148582	0.0703921	0.211077	0.832827	0.978794	Age Unchanged
Ncaph2	1403.01	0.0641891	0.0808904	0.793532	0.427468	0.836992	Age Unchanged
Gprc5b	988.45	0.122822	0.107786	1.1395	0.254493	0.695156	Age Unchanged
Man1a2	1090.4	-0.082382	0.088643	-0.929369	0.352698	0.78827	Age Unchanged
Acyp1	136.81	-0.161434	0.202473	-0.797309	0.425271	0.835382	Age Unchanged
Hdac5	2586.89	-0.112027	0.0818332	-1.36897	0.171009	0.58973	Age Unchanged
Vdac3	968.454	-0.14819	0.106459	-1.39199	0.163926	0.576689	Age Unchanged
Vps72	629.685	-0.0948229	0.104548	-0.906981	0.364417	0.795174	Age Unchanged
Gabpa	639.83	-0.131872	0.110866	-1.18947	0.234255	0.669378	Age Unchanged
Nf2	2273.06	0.000549197	0.0679691	0.0080801	0.993553	0.99874	Age Unchanged
Zmat5	126.019	0.12033	0.19472	0.617968	0.536597	0.887593	Age Unchanged
Ewsr1	3953.66	0.0630706	0.0678947	0.928948	0.352916	0.788375	Age Unchanged
Ap1b1	3449.39	-0.0499753	0.0731285	-0.683391	0.49436	0.869265	Age Unchanged
Gnat2	1018.63	-0.238738	0.163177	-1.46306	0.143451	0.5425	Age Unchanged
Bcl2l13	535.365	-0.0474154	0.101363	-0.467776	0.639945	0.92669	Age Unchanged
Dqx1	178.326	0.154226	0.162685	0.948008	0.343125	0.780291	Age Unchanged
Lnpk	165.29	-0.187816	0.187323	-1.00263	0.316038	0.759788	Age Unchanged
Trpm5	70.392	-0.129843	0.244933	-0.530116	0.596031	0.912157	Age Unchanged
Ascl2	14.3457	0.174888	0.558588	0.313089	0.754213	0.959918	Age Unchanged
Rarres2	463.422	0.0250219	0.107546	0.232662	0.816024	0.974401	Age Unchanged
Pttg1ip	3711.49	-0.0249588	0.0874286	-0.285476	0.775279	0.965814	Age Unchanged
Ube2g2	696.126	-0.0762932	0.127093	-0.600294	0.54831	0.892293	Age Unchanged
Met	87.9116	0.0790384	0.257334	0.307143	0.758735	0.960475	Age Unchanged
Elk1	362.212	-0.159764	0.119469	-1.33729	0.181129	0.602706	Age Unchanged
Nav1	1133.99	-0.0989435	0.117068	-0.845181	0.39801	0.821364	Age Unchanged
Tnpo1	1319.95	-0.0686797	0.0879543	-0.780857	0.434887	0.840276	Age Unchanged
Kcnq1	91.4336	-0.122388	0.2708	-0.451948	0.651306	0.931141	Age Unchanged
Cdk9	1410.76	0.0869595	0.0986455	0.881536	0.378028	0.807114	Age Unchanged
Tor2a	548.985	0.0815378	0.102723	0.793763	0.427333	0.836936	Age Unchanged
Fpgs	565.416	0.0666566	0.110499	0.603234	0.546353	0.891961	Age Unchanged
Mrtfb	710.807	0.159932	0.138317	1.15627	0.247572	0.687905	Age Unchanged
Cbx5	2401.79	-0.167415	0.130841	-1.27952	0.200712	0.629018	Age Unchanged
Sardh	542.066	-0.181835	0.13506	-1.34632	0.178198	0.597566	Age Unchanged
Vav2	731.491	0.102222	0.128903	0.793014	0.42777	0.836992	Age Unchanged
Tex15	25.0842	-0.18616	0.404104	-0.460674	0.645032	0.92912	Age Unchanged
Ppp2cb	907.421	-0.0187658	0.105262	-0.178277	0.858506	0.980717	Age Unchanged
Dmap1	390.796	0.0920007	0.116815	0.787577	0.430944	0.837691	Age Unchanged
Mcu	392.62	0.190901	0.126465	1.50952	0.131165	0.519214	Age Unchanged
Bcr	1107.25	-0.0702782	0.106815	-0.657944	0.510574	0.875794	Age Unchanged
Tfcp2	611.037	-0.00201243	0.109312	-0.0184098	0.985312	0.997791	Age Unchanged
Pou6f1	1229.18	-0.112554	0.0782008	-1.4393	0.150065	0.553204	Age Unchanged
Ubp1	1483.57	0.0471143	0.087	0.541544	0.588133	0.908425	Age Unchanged
Nuak2	110.833	0.241919	0.276553	0.874766	0.381701	0.808966	Age Unchanged
Ick	623.287	0.0317502	0.121877	0.260511	0.79447	0.969716	Age Unchanged
Sdhb	1194.08	-0.0198988	0.0787355	-0.25273	0.800477	0.971316	Age Unchanged
Cox4i2	88.648	0.0265154	0.220214	0.120407	0.904161	0.985542	Age Unchanged
Snap47	1305.54	-0.0672612	0.0917722	-0.732915	0.46361	0.855013	Age Unchanged
Vps4b	995.598	0.0172127	0.092312	0.186462	0.852083	0.980232	Age Unchanged
Rps25	2715.79	0.0479137	0.0670971	0.714094	0.475169	0.860595	Age Unchanged
Taz	1145.67	0.106707	0.0822779	1.29691	0.194661	0.621819	Age Unchanged
Kif19a	123.241	-0.219059	0.278727	-0.785926	0.431911	0.83772	Age Unchanged
Aldh3a2	1179.94	0.0699751	0.0910572	0.768474	0.442205	0.8429	Age Unchanged
Zmynd10	40.8478	0.0777418	0.414729	0.187452	0.851306	0.979891	Age Unchanged
Tmem115	785.855	0.0287128	0.109484	0.262256	0.793124	0.969716	Age Unchanged
Hyal2	879.262	0.112469	0.0957755	1.1743	0.240275	0.678407	Age Unchanged
Ifrd2	302.211	-0.00486486	0.134408	-0.0361947	0.971127	0.995431	Age Unchanged
Hyal1	259.64	-0.148796	0.145421	-1.0232	0.306211	0.751013	Age Unchanged
Tusc2	447.989	0.0424958	0.119642	0.355191	0.722447	0.953151	Age Unchanged
Nprl2	335.535	-0.118435	0.143523	-0.825199	0.409258	0.826319	Age Unchanged
Slc38a3	3114.4	0.0463262	0.11937	0.38809	0.69795	0.945941	Age Unchanged
Cacna2d2	1137.52	0.123614	0.142844	0.865375	0.386833	0.81341	Age Unchanged
Rassf1	286.824	0.0525247	0.164636	0.319035	0.7497	0.959342	Age Unchanged
Epn3	538.152	-0.212524	0.21064	-1.00895	0.313001	0.756663	Age Unchanged
Nxf1	2223.02	0.101472	0.0777598	1.30494	0.191912	0.618219	Age Unchanged
Stx5a	1292.93	0.0447671	0.0906764	0.493702	0.621517	0.920298	Age Unchanged
Slc47a1	6713.67	-0.197943	0.129297	-1.53091	0.125791	0.51023	Age Unchanged
Spire2	129.626	-0.00673172	0.20085	-0.0335162	0.973263	0.995794	Age Unchanged
X2610507B11Rik	3381.39	0.0615481	0.0728093	0.845333	0.397925	0.821355	Age Unchanged
Tmem86a	2519.18	0.109384	0.0931885	1.17379	0.240478	0.678564	Age Unchanged
Optc	76.0809	0.190359	0.228605	0.8327	0.405014	0.824648	Age Unchanged
Tex14	16.3955	0.152458	0.50465	0.302106	0.762572	0.961398	Age Unchanged
Ifi35	422.771	0.0132998	0.133459	0.0996548	0.920618	0.987867	Age Unchanged
Rdm1	464.739	-0.00836069	0.148422	-0.0563305	0.955078	0.99287	Age Unchanged
Nedd8	1205.24	-0.106326	0.0983447	-1.08116	0.279627	0.723608	Age Unchanged
Gosr1	821.586	-0.0715927	0.0944491	-0.758003	0.448449	0.845789	Age Unchanged
Mrpl52	368.834	-0.107555	0.126541	-0.849963	0.395346	0.819942	Age Unchanged
Eya4	99.4648	0.153634	0.204932	0.749681	0.453447	0.848999	Age Unchanged
Faf1	567.149	0.045453	0.0981601	0.46305	0.643329	0.928349	Age Unchanged
Tsacc	14.5595	-0.249549	0.548228	-0.455192	0.648971	0.930169	Age Unchanged
Mettl16	584.926	-0.106198	0.126534	-0.839281	0.401312	0.82304	Age Unchanged
Pigyl	268.146	-0.0673512	0.14063	-0.478927	0.631991	0.923996	Age Unchanged
Plcd1	1083.57	-0.0555195	0.0968428	-0.573296	0.566445	0.900642	Age Unchanged
Fads1	2592.93	0.0915783	0.0925304	0.989711	0.322316	0.763212	Age Unchanged
Lmbr1	321.733	0.0823644	0.138643	0.594075	0.552462	0.894505	Age Unchanged
Tnfrsf22	92.7558	-0.027724	0.213683	-0.129743	0.896769	0.985376	Age Unchanged
Cars	723.739	0.00121164	0.0990723	0.0122298	0.990242	0.998307	Age Unchanged
Phlda2	5.79652	0.235213	0.804625	0.292326	0.770037	0.963634	Age Unchanged
Grid2ip	8.82492	-0.121659	0.691757	-0.17587	0.860396	0.980717	Age Unchanged
Apip	206.537	-0.0744767	0.172152	-0.432623	0.665289	0.935605	Age Unchanged
Pdhx	304.728	-0.0783506	0.132066	-0.593268	0.553002	0.894505	Age Unchanged
Vac14	403.582	0.10214	0.141484	0.721917	0.470345	0.858697	Age Unchanged
Mcoln2	49.8279	-0.0597653	0.282578	-0.2115	0.832497	0.978527	Age Unchanged
Akt1s1	1046.34	-0.143206	0.107236	-1.33543	0.181735	0.6031	Age Unchanged
Tbrg1	903.236	0.0360042	0.0893474	0.402969	0.686971	0.942909	Age Unchanged
Brf1	1009.13	-0.0217191	0.0913501	-0.237756	0.81207	0.973118	Age Unchanged
Odc1	2523.23	-0.0527441	0.0940599	-0.56075	0.574968	0.90479	Age Unchanged
Thg1l	123.766	-0.0249834	0.181306	-0.137797	0.890401	0.984779	Age Unchanged
Pabpc4	1043.14	-0.0308501	0.0998557	-0.308947	0.757362	0.960475	Age Unchanged
Exoc3l2	650.437	-0.101104	0.11926	-0.847765	0.396569	0.82075	Age Unchanged
Zfp296	25.0399	-0.121441	0.478468	-0.253813	0.79964	0.971075	Age Unchanged
Sugp1	777.588	0.0347328	0.0983132	0.353287	0.723873	0.953865	Age Unchanged
Dhdh	554.284	0.00286285	0.11866	0.0241264	0.980752	0.996562	Age Unchanged
Fuz	314.497	-0.112564	0.175009	-0.643186	0.520104	0.880576	Age Unchanged
Pgam1	1717.38	-0.0955577	0.0865631	-1.10391	0.269633	0.713596	Age Unchanged
Evi5	635.691	-0.0736056	0.103362	-0.712117	0.476392	0.861419	Age Unchanged
Evi5l	721.022	-0.134802	0.107574	-1.25311	0.210166	0.641733	Age Unchanged
Snapc2	293.536	-0.094504	0.127486	-0.741292	0.458516	0.851383	Age Unchanged
Gltp	772.114	0.0359599	0.0997876	0.360364	0.718575	0.9521	Age Unchanged
Bnip2	1463.01	0.0474624	0.0844786	0.561827	0.574234	0.904259	Age Unchanged
Ccnt1	668.652	-0.107277	0.12736	-0.842316	0.399611	0.822264	Age Unchanged
Brms1l	525.424	-0.00159106	0.106803	-0.0148972	0.988114	0.997911	Age Unchanged
Med15	926.847	0.0424723	0.135329	0.313846	0.753638	0.959918	Age Unchanged
Dhdds	984.849	-0.0629485	0.0861668	-0.730542	0.465059	0.855946	Age Unchanged
Crybg2	6.42504	0.156132	0.813543	0.191916	0.847808	0.979854	Age Unchanged
Ubxn11	367.034	0.131131	0.175562	0.746921	0.455111	0.849238	Age Unchanged
Rpl15	2765.38	-0.00614093	0.0693975	-0.0884893	0.929488	0.989403	Age Unchanged
Steap4	1444.56	-0.0115901	0.0911557	-0.127147	0.898824	0.985434	Age Unchanged
Mplkip	135.73	-0.026936	0.190762	-0.141202	0.88771	0.984336	Age Unchanged
Kif11	63.0801	0.060053	0.267759	0.22428	0.822539	0.976731	Age Unchanged
Rpa3	158.661	-0.106092	0.193655	-0.54784	0.583802	0.906878	Age Unchanged
Tnpo3	740.578	-0.00791031	0.0912187	-0.086718	0.930896	0.989403	Age Unchanged
Ttll5	502.333	0.0568865	0.148704	0.382547	0.702055	0.947117	Age Unchanged
Zfp715	320.94	-0.0609589	0.143845	-0.423782	0.671725	0.938357	Age Unchanged
Rps5	3853.91	-0.0055763	0.0682109	-0.0817508	0.934845	0.98982	Age Unchanged
Etv5	277.008	-0.0334283	0.148117	-0.225689	0.821443	0.976554	Age Unchanged
Gfod2	190.83	-0.0445477	0.180845	-0.24633	0.805427	0.971814	Age Unchanged
Enkd1	178.648	0.0442031	0.165501	0.267086	0.789403	0.968964	Age Unchanged
Atp6v0d1	1625.47	-0.0698292	0.0760909	-0.917708	0.358772	0.791166	Age Unchanged
Slc41a1	2301.95	0.044222	0.100613	0.439526	0.66028	0.934191	Age Unchanged
Iglon5	44.8203	0.053027	0.302638	0.175216	0.86091	0.980717	Age Unchanged
B4galnt2	20.8364	0.0699379	0.462047	0.151366	0.879687	0.983506	Age Unchanged
Nelfb	1167.48	-0.0762625	0.0799351	-0.954055	0.340056	0.77682	Age Unchanged
Card14	270.892	0.24879	0.257897	0.964686	0.334702	0.772621	Age Unchanged
Tmem175	583.544	-0.0331191	0.10857	-0.305048	0.76033	0.960756	Age Unchanged
Tango2	417.844	0.136799	0.127506	1.07288	0.283323	0.727543	Age Unchanged
Ndufs2	2351.17	-0.0183284	0.0729037	-0.251406	0.8015	0.971457	Age Unchanged
Atraid	890.794	-0.0180561	0.091139	-0.198116	0.842955	0.979048	Age Unchanged
Sh3bp5l	639.734	-0.0561658	0.103854	-0.540813	0.588637	0.908511	Age Unchanged
Atad1	1098.22	-0.0227566	0.0893056	-0.254817	0.798864	0.971075	Age Unchanged
Pten	1555.17	-0.0624363	0.103523	-0.603115	0.546432	0.891961	Age Unchanged
Timm23	617.517	0.0756248	0.109448	0.690963	0.489589	0.868326	Age Unchanged
Tnfaip8l2	213.339	0.181935	0.150358	1.21002	0.226272	0.660623	Age Unchanged
Trnt1	361.786	0.0603841	0.147034	0.410681	0.681307	0.941171	Age Unchanged
Ehmt2	3236.61	0.0276053	0.069914	0.394846	0.692957	0.944621	Age Unchanged
St3gal1	1108.19	0.206654	0.170207	1.21413	0.224697	0.658613	Age Unchanged
Tmem259	2357.34	-0.0889041	0.103001	-0.863141	0.38806	0.814665	Age Unchanged
Rnf170	322.943	0.0210253	0.136753	0.153747	0.877809	0.983329	Age Unchanged
Nit1	440.347	-0.029223	0.114502	-0.255218	0.798554	0.971075	Age Unchanged
Prdm15	170.24	-0.0588077	0.167335	-0.351437	0.72526	0.954342	Age Unchanged
Rnf168	463.334	-0.0764059	0.11177	-0.683599	0.494229	0.869265	Age Unchanged
Tctex1d2	152.653	0.0940919	0.178192	0.528036	0.597474	0.912619	Age Unchanged
Chp1	1844.31	0.0693362	0.131714	0.526414	0.5986	0.912803	Age Unchanged
Trpv4	1046.25	0.0461988	0.184247	0.250743	0.802013	0.971457	Age Unchanged
Klhl3	166.694	-0.0119669	0.183793	-0.0651108	0.948086	0.992385	Age Unchanged
Tvp23b	903.816	-0.0744378	0.0961272	-0.774368	0.438713	0.841973	Age Unchanged
Dnajc7	1473.96	0.0336462	0.0752569	0.447085	0.654814	0.932113	Age Unchanged
Zfp385c	19.7367	-0.0560133	0.47199	-0.118675	0.905533	0.985684	Age Unchanged
Cacybp	682.526	-0.142761	0.114067	-1.25156	0.210732	0.64196	Age Unchanged
Cluap1	181.88	-0.0189722	0.157767	-0.120255	0.904282	0.985542	Age Unchanged
Zswim7	140.39	0.030883	0.18139	0.170257	0.864808	0.980813	Age Unchanged
Pigl	124.619	0.103416	0.186609	0.554183	0.579453	0.905161	Age Unchanged
Ndufa2	923.53	-0.100302	0.094823	-1.05778	0.290155	0.733914	Age Unchanged
Pam16	264.439	-0.0752292	0.132004	-0.569899	0.568746	0.901555	Age Unchanged
Cox6c	1580.89	0.0604242	0.102503	0.589487	0.555534	0.895772	Age Unchanged
Tmem87b	939.702	0.0590475	0.104591	0.564555	0.572377	0.903443	Age Unchanged
Anapc1	1573.07	-0.040777	0.116716	-0.349369	0.726813	0.954461	Age Unchanged
Mertk	673.022	0.18521	0.148873	1.24409	0.213468	0.646332	Age Unchanged
Tsg101	784.972	0.00933102	0.0891676	0.104646	0.916657	0.987369	Age Unchanged
Hps5	706.232	-0.0288074	0.109863	-0.262212	0.793158	0.969716	Age Unchanged
Map3k4	804.344	0.0507554	0.0933768	0.543555	0.586748	0.907935	Age Unchanged
Piezo1	1634.23	0.145509	0.158704	0.916859	0.359217	0.791506	Age Unchanged
Rnf166	757.698	-0.0927783	0.0949658	-0.976965	0.328586	0.767574	Age Unchanged
Ankrd28	554.589	0.0130221	0.12114	0.107497	0.914395	0.986953	Age Unchanged
Pkd2l2	152.505	-0.0738919	0.175329	-0.421448	0.673428	0.938658	Age Unchanged
Srp19	477.622	-0.135273	0.109804	-1.23195	0.217966	0.650039	Age Unchanged
Wdfy2	615.396	0.0971647	0.123249	0.788364	0.430484	0.837691	Age Unchanged
Rbsn	709.272	-0.0304758	0.0967892	-0.314868	0.752862	0.959918	Age Unchanged
Dguok	460.568	-0.0166538	0.112246	-0.148368	0.882052	0.983506	Age Unchanged
Csf1	1694.2	0.0621392	0.0961227	0.646457	0.517983	0.879561	Age Unchanged
Strip1	815.649	-0.0857777	0.094761	-0.9052	0.365359	0.795742	Age Unchanged
Kif1a	1157.37	-0.00366786	0.108558	-0.0337871	0.973047	0.995794	Age Unchanged
Alx3	128.746	0.114577	0.189586	0.604353	0.545609	0.891522	Age Unchanged
Slc25a11	1358.88	-0.0307929	0.100797	-0.305494	0.75999	0.960647	Age Unchanged
Cmc2	212.469	0.0219755	0.14844	0.148043	0.882309	0.983506	Age Unchanged
Chfr	349.882	0.21169	0.150545	1.40616	0.159677	0.569424	Age Unchanged
Ankrd53	8.32656	0.103515	0.696339	0.148656	0.881825	0.983506	Age Unchanged
Tex261	1539.69	0.00276806	0.074979	0.0369178	0.970551	0.995294	Age Unchanged
Fam120b	751.434	-0.0654215	0.113541	-0.576195	0.564483	0.899624	Age Unchanged
Tbp	333.964	0.100927	0.122705	0.822523	0.410779	0.827462	Age Unchanged
Psmb1	1310.4	0.0130954	0.0796294	0.164454	0.869374	0.981628	Age Unchanged
Fhod1	794.918	0.0142452	0.0923181	0.154306	0.877369	0.983329	Age Unchanged
Slc9a5	242.235	0.00971508	0.157617	0.0616374	0.950852	0.992557	Age Unchanged
Elmo3	393.24	-0.00213833	0.147745	-0.0144731	0.988453	0.997911	Age Unchanged
Stc1	123.532	-0.237154	0.280071	-0.846763	0.397127	0.820954	Age Unchanged
X4931428F04Rik	191.541	-0.123613	0.175142	-0.705786	0.480321	0.86318	Age Unchanged
Msh3	265.704	-0.0546482	0.14138	-0.386535	0.699101	0.946177	Age Unchanged
Tmem208	456.915	-0.0393585	0.110476	-0.356264	0.721643	0.95294	Age Unchanged
E2f4	699.616	-0.142644	0.102158	-1.3963	0.162625	0.574276	Age Unchanged
Surf2	343.797	-0.0889413	0.119012	-0.747331	0.454864	0.849238	Age Unchanged
Dnajb9	764.573	0.105277	0.160119	0.657492	0.510864	0.875794	Age Unchanged
Naf1	248.866	-0.14811	0.150532	-0.983907	0.325161	0.765652	Age Unchanged
Yes1	320.458	-0.102346	0.166216	-0.615743	0.538064	0.887729	Age Unchanged
Ppp1cb	2216.51	-0.0662432	0.0771483	-0.858648	0.390535	0.81664	Age Unchanged
Gorasp2	1456.64	-0.0519123	0.0888986	-0.58395	0.559254	0.897292	Age Unchanged
Tsen15	226.575	0.0193049	0.154156	0.125229	0.900342	0.985542	Age Unchanged
Efr3a	1054.96	-0.0708657	0.0901013	-0.786512	0.431568	0.837691	Age Unchanged
Trappc2l	514.557	0.0182364	0.107874	0.169053	0.865755	0.980853	Age Unchanged
Acsf3	305.13	-0.114813	0.133882	-0.857569	0.39113	0.817152	Age Unchanged
Ddx19a	561.398	0.00154468	0.101099	0.0152789	0.98781	0.997911	Age Unchanged
Gata2	902.06	0.117389	0.0921835	1.27343	0.202865	0.63134	Age Unchanged
Entpd2	241.184	-0.174276	0.147603	-1.18071	0.237719	0.674486	Age Unchanged
Edf1	1355.11	-0.0967379	0.0909249	-1.06393	0.28736	0.731842	Age Unchanged
Npdc1	2241.24	-0.0638624	0.0932301	-0.684998	0.493345	0.869231	Age Unchanged
Fbxw5	1287.56	0.103137	0.0879122	1.17318	0.240722	0.678564	Age Unchanged
Slc25a13	182.47	-0.0703352	0.169827	-0.414157	0.678759	0.940429	Age Unchanged
Ube2i	1710.72	0.120487	0.100664	1.19693	0.231335	0.665826	Age Unchanged
Tsr3	293.67	-0.0161825	0.131353	-0.123198	0.90195	0.985542	Age Unchanged
Unkl	355.357	0.0164686	0.123664	0.133172	0.894058	0.985196	Age Unchanged
Lrrk1	1277.22	0.0272102	0.124583	0.218411	0.827109	0.97731	Age Unchanged
Sirt2	2149.83	-0.107636	0.0698637	-1.54066	0.123399	0.505583	Age Unchanged
Hnrnpl	4813.58	-0.0883055	0.0683747	-1.29149	0.196533	0.624115	Age Unchanged
Nolc1	834.468	0.0428731	0.0886201	0.483785	0.628538	0.92393	Age Unchanged
Casd1	675.019	-0.182645	0.119599	-1.52714	0.126726	0.512388	Age Unchanged
Mtmr1	564.95	-0.0393976	0.107346	-0.367015	0.713608	0.950598	Age Unchanged
Hmgb3	122.369	0.214479	0.211449	1.01433	0.310425	0.754208	Age Unchanged
Cyp2j9	90.932	0.144885	0.253381	0.571808	0.567452	0.901492	Age Unchanged
Abca1	1984.31	-0.0364332	0.158178	-0.23033	0.817835	0.974828	Age Unchanged
Nipsnap3b	246.802	0.109997	0.155152	0.708962	0.478348	0.86242	Age Unchanged
Lage3	338.29	-0.0943027	0.132925	-0.709442	0.47805	0.862345	Age Unchanged
Ubl4a	555.739	-0.0891863	0.0999284	-0.892501	0.372124	0.801088	Age Unchanged
Sash1	1800.67	-0.142111	0.09413	-1.50973	0.131113	0.519115	Age Unchanged
Gadd45b	660.418	0.18327	0.143655	1.27577	0.202036	0.630793	Age Unchanged
Zdhhc12	189.144	0.0968374	0.183018	0.529115	0.596725	0.91256	Age Unchanged
Endog	153.316	-0.0419849	0.176523	-0.237844	0.812002	0.973118	Age Unchanged
Golga7	600.672	-0.0131223	0.103316	-0.127011	0.898932	0.985434	Age Unchanged
Xk	93.806	0.0457765	0.227136	0.201538	0.840278	0.97895	Age Unchanged
Cd48	151.403	0.192623	0.174127	1.10622	0.26863	0.712095	Age Unchanged
Clpx	704.76	0.0478263	0.0914135	0.523187	0.600844	0.913021	Age Unchanged
Trabd	745.486	0.117845	0.103176	1.14217	0.253382	0.693634	Age Unchanged
Dennd6b	922.969	0.109098	0.110419	0.988036	0.323135	0.764015	Age Unchanged
Cd83	184.965	0.220361	0.153339	1.43708	0.150694	0.554292	Age Unchanged
Cltrn	18.8255	0.0022863	0.560975	0.00407559	0.996748	0.999411	Age Unchanged
C4a	72.7202	-0.228915	0.235378	-0.972544	0.33078	0.769363	Age Unchanged
Notch4	754.792	0.172676	0.169653	1.01782	0.308764	0.753073	Age Unchanged
Ppt2	255.598	-0.0303279	0.137987	-0.219788	0.826037	0.977199	Age Unchanged
Prrt1	1184.26	-0.0435454	0.110679	-0.393438	0.693996	0.944914	Age Unchanged
Rnf5	570.175	0.110578	0.101501	1.08943	0.275966	0.720243	Age Unchanged
Cacfd1	846.887	-0.14069	0.0945884	-1.48739	0.136913	0.530508	Age Unchanged
Hivep2	433.32	0.0697969	0.120696	0.578288	0.56307	0.899009	Age Unchanged
Arnt	1331.42	-0.0715328	0.0798444	-0.895903	0.370305	0.79958	Age Unchanged
Itga2	111.71	0.224828	0.31694	0.70937	0.478095	0.862345	Age Unchanged
Mocs2	666.038	-0.0653485	0.106256	-0.615012	0.538547	0.887853	Age Unchanged
Nat9	305.449	0.0192838	0.125223	0.153996	0.877613	0.983329	Age Unchanged
Atp6v0e	1296.68	0.0404332	0.0896291	0.451117	0.651905	0.931349	Age Unchanged
Zfp318	402.893	-0.0323109	0.121073	-0.266872	0.789568	0.968964	Age Unchanged
Ttbk1	24.8247	0.136194	0.534893	0.254619	0.799018	0.971075	Age Unchanged
Gata3	28.7536	0.209363	0.508853	0.411442	0.680749	0.94117	Age Unchanged
Lama5	1950.7	0.142368	0.149296	0.953599	0.340287	0.77682	Age Unchanged
Steap1	227.75	-0.110405	0.235192	-0.469424	0.638766	0.926211	Age Unchanged
Steap2	882.046	0.0717468	0.165041	0.434721	0.663765	0.935224	Age Unchanged
Serac1	132.157	0.00566014	0.183365	0.0308682	0.975375	0.995858	Age Unchanged
Pdzd11	318.32	-0.0728149	0.134142	-0.542818	0.587255	0.908204	Age Unchanged
Psma2	1068.76	0.0380149	0.0813826	0.467113	0.640419	0.926886	Age Unchanged
Mrpl32	204.461	-0.0509725	0.177745	-0.286773	0.774286	0.965287	Age Unchanged
Setdb1	708.37	-0.00905455	0.104676	-0.0865008	0.931068	0.989403	Age Unchanged
Anxa9	58.4452	-0.196792	0.268238	-0.733644	0.463165	0.85444	Age Unchanged
Arnt2	597.216	0.116152	0.144253	0.805199	0.420705	0.833184	Age Unchanged
Prune1	481.958	-0.065021	0.106354	-0.611363	0.540959	0.889119	Age Unchanged
Cers2	2159.42	-0.0140118	0.074395	-0.188343	0.850608	0.979891	Age Unchanged
Capza2	1757.97	0.0171961	0.0770289	0.223243	0.823347	0.976731	Age Unchanged
Plekho1	801.538	0.0189885	0.101414	0.187236	0.851475	0.979924	Age Unchanged
Vps45	294.014	-0.0926951	0.151475	-0.611949	0.540572	0.889015	Age Unchanged
Prpf3	528.062	-0.143349	0.117251	-1.22259	0.221486	0.654535	Age Unchanged
Anp32e	3386.61	-0.0738039	0.10109	-0.73008	0.465342	0.856052	Age Unchanged
Aph1a	862.165	-0.0369776	0.105454	-0.350652	0.72585	0.95435	Age Unchanged
Ppil4	693.654	0.0107945	0.10057	0.107333	0.914525	0.986953	Age Unchanged
Cnih1	588.227	-0.0847924	0.104741	-0.809546	0.418201	0.832174	Age Unchanged
Eps8	617.374	0.102699	0.116875	0.878705	0.379561	0.808216	Age Unchanged
Med22	959.634	-0.000661009	0.0840888	-0.00786085	0.993728	0.998863	Age Unchanged
Surf1	839.277	0.0612277	0.0918457	0.666636	0.505004	0.873709	Age Unchanged
Med28	721.785	-0.132807	0.111283	-1.19342	0.232704	0.66781	Age Unchanged
Qdpr	503.792	0.0443394	0.104963	0.422428	0.672712	0.93843	Age Unchanged
Gnrh1	21.9572	-0.0249215	0.419863	-0.0593563	0.952668	0.992696	Age Unchanged
Sqstm1	6697.22	0.166556	0.109234	1.52477	0.127316	0.513248	Age Unchanged
Nfe2l2	1939.13	0.131633	0.08747	1.5049	0.13235	0.52117	Age Unchanged
Rxrg	1072.9	0.107062	0.131565	0.813762	0.415781	0.831213	Age Unchanged
Adamtsl4	551.677	0.229648	0.175989	1.3049	0.191927	0.618219	Age Unchanged
Prpsap1	786.688	-0.0254735	0.0949733	-0.268218	0.788532	0.968964	Age Unchanged
Ncapg	15.807	-0.150973	0.605821	-0.249203	0.803203	0.971457	Age Unchanged
Lcorl	139.508	0.139968	0.187149	0.747895	0.454524	0.849238	Age Unchanged
Lta4h	871.142	-0.0343569	0.0920617	-0.373194	0.709004	0.949	Age Unchanged
Dstn	3143.85	-0.103988	0.0858376	-1.21144	0.225725	0.659979	Age Unchanged
Macroh2a1	1397.07	-0.0958553	0.0795272	-1.20531	0.228082	0.662424	Age Unchanged
Gtf2ird2	430.218	0.108933	0.130779	0.832955	0.40487	0.824532	Age Unchanged
Bola1	240.109	0.0343751	0.149822	0.22944	0.818527	0.97497	Age Unchanged
Castor2	940.603	0.0411778	0.118291	0.348105	0.727761	0.954716	Age Unchanged
Adss	882.693	0.0314719	0.0891949	0.352844	0.724205	0.953865	Age Unchanged
Cacna1d	316.907	0.241603	0.158605	1.5233	0.127683	0.513963	Age Unchanged
Actr8	642.175	-0.0246898	0.0956286	-0.258184	0.796265	0.970402	Age Unchanged
Stk32c	62.3233	0.182054	0.312527	0.582522	0.560215	0.89774	Age Unchanged
Fnta	1300.34	-0.0365766	0.0826034	-0.442798	0.657912	0.933131	Age Unchanged
Mtrex	844.658	0.0222803	0.0896989	0.24839	0.803832	0.971487	Age Unchanged
Celsr1	202.726	0.162058	0.203093	0.797951	0.424899	0.835382	Age Unchanged
Stard13	845.472	0.0208311	0.0913398	0.228061	0.819598	0.975562	Age Unchanged
Camk1g	144.069	-0.165259	0.178273	-0.927001	0.353926	0.789178	Age Unchanged
Utp25	218.629	0.0365633	0.147438	0.247991	0.804142	0.971487	Age Unchanged
Hsd11b1	161.711	-0.00408338	0.173664	-0.0235131	0.981241	0.996608	Age Unchanged
Atp5e	1235.53	-0.137094	0.105921	-1.29431	0.195558	0.622595	Age Unchanged
Nelfcd	855.913	0.0967764	0.0976809	0.99074	0.321812	0.76319	Age Unchanged
Ctsz	4021.72	0.0172677	0.0976765	0.176784	0.859678	0.980717	Age Unchanged
Prelid3b	480.525	-0.110134	0.118269	-0.931215	0.351742	0.78769	Age Unchanged
Ube2a	292.162	-0.041842	0.140582	-0.297633	0.765983	0.962414	Age Unchanged
Slc25a5	2281.86	0.041508	0.0802131	0.517471	0.604827	0.913349	Age Unchanged
Nkap	288.362	0.0358695	0.12784	0.28058	0.779033	0.966537	Age Unchanged
Ndufa1	519.133	-0.0169134	0.123584	-0.136857	0.891144	0.984943	Age Unchanged
E2f3	239.313	-0.0117737	0.138131	-0.0852356	0.932074	0.989497	Age Unchanged
Cr1l	1002.16	0.0593998	0.0983549	0.603933	0.545888	0.891605	Age Unchanged
Ppfibp1	1818.77	-0.104365	0.0815428	-1.27988	0.200588	0.629018	Age Unchanged
Cd46	83.3901	0.225475	0.21835	1.03263	0.301779	0.74646	Age Unchanged
Gtf3a	142.623	-0.244971	0.179537	-1.36446	0.172424	0.591333	Age Unchanged
Mtif3	164.883	-0.0324159	0.174752	-0.185496	0.85284	0.980252	Age Unchanged
Dyrk3	59.6807	0.204192	0.267121	0.764421	0.444617	0.843769	Age Unchanged
Mapkapk2	1318.84	-0.0816247	0.0955599	-0.854173	0.393009	0.818296	Age Unchanged
Lamp2	5101.27	-0.12812	0.0914992	-1.40023	0.161445	0.57261	Age Unchanged
Eif3d	532.11	0.0747044	0.109111	0.684662	0.493557	0.869231	Age Unchanged
Phf21b	331.417	0.182796	0.12612	1.44937	0.147233	0.549053	Age Unchanged
Ift27	343.26	-0.126724	0.124185	-1.02044	0.307519	0.752288	Age Unchanged
Pacsin2	1614.54	-0.00167114	0.0863939	-0.0193432	0.984567	0.997597	Age Unchanged
Cmah	149.34	0.210992	0.173002	1.2196	0.222618	0.655948	Age Unchanged
Ttll12	429.943	-0.167755	0.114836	-1.46082	0.144064	0.5435	Age Unchanged
Bik	31.7295	-0.127122	0.371222	-0.342444	0.732017	0.955326	Age Unchanged
Tox4	980.713	0.0469923	0.0923572	0.50881	0.610885	0.915919	Age Unchanged
Mrps18c	52.7249	0.192448	0.290937	0.661476	0.508307	0.874985	Age Unchanged
Sulf1	3169.54	0.0354088	0.124224	0.285039	0.775614	0.965846	Age Unchanged
Plcg1	2171.74	-0.0811851	0.0891054	-0.911113	0.362236	0.792477	Age Unchanged
Kctd2	982.866	-0.0879477	0.092245	-0.953414	0.34038	0.77682	Age Unchanged
Kctd5	377.34	-0.120561	0.136967	-0.880214	0.378743	0.807918	Age Unchanged
Etaa1	111.944	0.0724553	0.21323	0.339799	0.734008	0.955346	Age Unchanged
Sdc4	2240.35	-0.0761622	0.101807	-0.748105	0.454397	0.849238	Age Unchanged
Nbr1	2709.15	-0.030628	0.0744174	-0.41157	0.680654	0.941108	Age Unchanged
Cyth1	824.75	0.0546486	0.0886302	0.616592	0.537504	0.887729	Age Unchanged
Rnd3	735.914	-0.0641893	0.136771	-0.46932	0.638841	0.92622	Age Unchanged
Cntnap1	858.619	-0.0859174	0.100228	-0.857222	0.391322	0.81746	Age Unchanged
Coa3	664.368	-0.154667	0.108507	-1.42542	0.154036	0.560602	Age Unchanged
Med24	1277.87	-0.0286177	0.0788372	-0.362997	0.716607	0.951513	Age Unchanged
Psmd3	1511.05	-0.000876246	0.0965977	-0.00907108	0.992762	0.998476	Age Unchanged
Exosc10	1017.29	0.0214064	0.0941717	0.227312	0.820181	0.975992	Age Unchanged
Glod4	690.688	-0.0360012	0.129765	-0.277434	0.781447	0.967299	Age Unchanged
Vps53	1046.36	0.0837857	0.0930818	0.90013	0.368051	0.798034	Age Unchanged
Taok1	855.076	-0.0169046	0.106267	-0.159077	0.873608	0.982159	Age Unchanged
Dnttip1	268.484	-0.147537	0.13385	-1.10225	0.270351	0.714341	Age Unchanged
Acot8	299.783	0.134489	0.132735	1.01322	0.310957	0.75469	Age Unchanged
Cd300lg	723.441	0.160474	0.114123	1.40615	0.15968	0.569424	Age Unchanged
Vtn	3897.18	0.0306414	0.0816934	0.375078	0.707603	0.948512	Age Unchanged
Nlk	661.499	0.031314	0.140373	0.223077	0.823475	0.976731	Age Unchanged
Rpl19	1646.13	0.0497761	0.0734932	0.677288	0.498223	0.871135	Age Unchanged
Nek8	375.213	-0.0115737	0.126777	-0.0912916	0.927261	0.989273	Age Unchanged
Zfp207	1857.11	0.0445836	0.0753632	0.591582	0.55413	0.895448	Age Unchanged
Psmd11	909.165	-0.113651	0.0905399	-1.25526	0.209384	0.640611	Age Unchanged
Pipox	33.1652	-0.119184	0.370833	-0.321396	0.74791	0.958829	Age Unchanged
Zc3h18	1275.69	-0.0868895	0.0798475	-1.08819	0.27651	0.720937	Age Unchanged
Top2b	1485.8	-0.0907878	0.0815428	-1.11338	0.265547	0.709005	Age Unchanged
Rarb	169.873	0.15329	0.239666	0.639598	0.522434	0.881638	Age Unchanged
Igfbp4	17379.5	-0.0516316	0.125024	-0.412974	0.679625	0.940819	Age Unchanged
Suz12	767.675	0.0367476	0.100158	0.366896	0.713697	0.950598	Age Unchanged
Atad5	71.9382	0.0345453	0.232818	0.148379	0.882044	0.983506	Age Unchanged
Crlf3	602.723	-0.073493	0.106457	-0.690352	0.489973	0.868331	Age Unchanged
Tns4	188.937	0.0170448	0.254064	0.0670887	0.946511	0.991789	Age Unchanged
Tnfaip1	1534.14	-0.108883	0.0774073	-1.40662	0.15954	0.569308	Age Unchanged
Abr	2134.92	0.103434	0.0853248	1.21224	0.22542	0.659415	Age Unchanged
Rab11fip4	558.439	-0.0847957	0.196665	-0.431169	0.666345	0.936182	Age Unchanged
Slc35c2	781.729	0.0164957	0.104175	0.158347	0.874184	0.982537	Age Unchanged
Wsb1	991.511	-0.0633415	0.109289	-0.579577	0.5622	0.899003	Age Unchanged
Ttpal	603.527	0.0323593	0.162466	0.199176	0.842125	0.978968	Age Unchanged
Rhot1	932.006	-0.0593795	0.0865522	-0.686054	0.492679	0.86902	Age Unchanged
Rhbdl3	291.935	0.00178374	0.130574	0.0136608	0.989101	0.998013	Age Unchanged
Ada	194.113	0.210829	0.182481	1.15535	0.247949	0.688751	Age Unchanged
Serinc3	10446.1	0.181564	0.120768	1.50342	0.132732	0.521839	Age Unchanged
Pgs1	636.861	-0.0832555	0.13555	-0.614205	0.53908	0.888171	Age Unchanged
Wfdc2	231.598	-0.10891	0.23835	-0.456933	0.647719	0.929675	Age Unchanged
Dbndd2	121.433	0.12297	0.216785	0.567245	0.570548	0.902497	Age Unchanged
Ghdc	388.214	-0.105462	0.130297	-0.809396	0.418287	0.832209	Age Unchanged
Pltp	3247.79	0.0341587	0.110988	0.307769	0.758258	0.960475	Age Unchanged
Zswim1	222.77	-0.0430276	0.168152	-0.255885	0.798039	0.971075	Age Unchanged
Spata25	10.341	-0.161715	0.598744	-0.27009	0.787091	0.968455	Age Unchanged
Myo1c	3028.33	-0.00294641	0.120957	-0.0243592	0.980566	0.996562	Age Unchanged
Crk	2024.41	-0.133503	0.0892801	-1.49533	0.134829	0.525855	Age Unchanged
Pitpna	2993.52	-0.0207537	0.0998573	-0.207833	0.835359	0.97895	Age Unchanged
Mlx	349.807	-0.0886584	0.129568	-0.684262	0.49381	0.869231	Age Unchanged
Retreg3	1444.62	0.0163164	0.0856863	0.190421	0.84898	0.979854	Age Unchanged
Rab5a	875.912	-0.0741964	0.124762	-0.594703	0.552042	0.894505	Age Unchanged
Nkiras2	444.237	-0.0583097	0.112673	-0.517514	0.604798	0.913349	Age Unchanged
Ppp2r5c	1664.05	-0.039719	0.075257	-0.527778	0.597653	0.912619	Age Unchanged
Ift52	534.831	-0.0926299	0.106283	-0.871537	0.383461	0.810365	Age Unchanged
Mybl2	73.3948	0.177005	0.251132	0.704825	0.480919	0.863636	Age Unchanged
Eya2	2151.28	0.02086	0.152624	0.136676	0.891287	0.984943	Age Unchanged
B4galt5	785.355	0.164677	0.145367	1.13283	0.257285	0.699199	Age Unchanged
Ptgis	2793.44	0.155899	0.117157	1.33068	0.183293	0.60497	Age Unchanged
Cadps2	75.2959	0.000946225	0.256042	0.00369558	0.997051	0.999411	Age Unchanged
Cyth3	2641.83	0.0897316	0.140898	0.636856	0.524219	0.881803	Age Unchanged
Rac3	144.187	-0.229184	0.17795	-1.28791	0.197777	0.625581	Age Unchanged
Rrp7a	851.759	0.023789	0.0960959	0.247555	0.804479	0.971487	Age Unchanged
Ints2	227.676	0.0379333	0.149987	0.25291	0.800338	0.971316	Age Unchanged
Med13l	1300.3	0.172682	0.134268	1.2861	0.198408	0.625923	Age Unchanged
H2bc4	1499.18	-0.150005	0.107512	-1.39525	0.162942	0.574606	Age Unchanged
Baiap2l2	16.2301	0.203681	0.499183	0.408029	0.683252	0.942413	Age Unchanged
Med1	597.507	-0.122195	0.122644	-0.996341	0.319084	0.761082	Age Unchanged
Erbb3	212.998	0.0565475	0.24305	0.232658	0.816027	0.974401	Age Unchanged
Stard3	644.739	-0.0560378	0.106242	-0.527456	0.597877	0.912619	Age Unchanged
Uchl5	217.376	0.0758827	0.155892	0.486765	0.626425	0.922887	Age Unchanged
Glrx2	453.397	-0.1372	0.113464	-1.20919	0.22659	0.660935	Age Unchanged
Ro60	629.4	-0.0250047	0.116231	-0.215129	0.829667	0.977974	Age Unchanged
Stk4	673.039	-0.0647104	0.111925	-0.578156	0.563159	0.899009	Age Unchanged
Pmp22	3288.51	-0.170305	0.117996	-1.44331	0.148933	0.551618	Age Unchanged
Gdf9	22.8751	-0.233045	0.439485	-0.530268	0.595926	0.912143	Age Unchanged
Zcchc10	137.899	-0.033295	0.18014	-0.184829	0.853363	0.980252	Age Unchanged
Psmb6	1387.99	-0.0364634	0.0774918	-0.470545	0.637966	0.925873	Age Unchanged
Spag7	698.379	-0.106266	0.0975104	-1.08979	0.275806	0.720243	Age Unchanged
Pfn1	4508.68	-0.0654193	0.0868214	-0.753493	0.451154	0.847863	Age Unchanged
Tomm34	793.156	-0.00477131	0.0923768	-0.0516506	0.958807	0.99297	Age Unchanged
Ksr1	471.17	-0.0451777	0.114965	-0.392969	0.694342	0.944914	Age Unchanged
Zkscan6	170.874	-0.0491968	0.173343	-0.283812	0.776554	0.966194	Age Unchanged
Kpna2	619.906	0.0610343	0.126889	0.481007	0.630512	0.923944	Age Unchanged
Smurf2	1100.03	-0.0831297	0.100961	-0.823388	0.410288	0.826908	Age Unchanged
Cep95	259.562	-0.00193401	0.141365	-0.013681	0.989085	0.998013	Age Unchanged
Vezf1	1344.75	-0.0519112	0.0794871	-0.653077	0.513707	0.877143	Age Unchanged
Srsf1	2948.42	-0.00481295	0.0907994	-0.0530064	0.957727	0.99297	Age Unchanged
Shroom1	203.218	0.0261904	0.173645	0.150827	0.880112	0.983506	Age Unchanged
Kif3a	456.371	-0.194651	0.134494	-1.44729	0.147816	0.549848	Age Unchanged
Mtmr4	797.316	-0.00374086	0.0957548	-0.0390671	0.968837	0.994985	Age Unchanged
Mrm1	287.482	0.0165651	0.135051	0.122658	0.902378	0.985542	Age Unchanged
[truncated: 53,386 more rows]
