# Supplementary material for: The meningeal transcriptional response to traumatic brain injury and aging
Source: eLife. 2023 Jan 3;12:e81154. doi: 10.7554/eLife.81154 (PMC9810333; doi:10.7554/eLife.81154)
Supplement: Figure 6—source data 2. [file elife-81154-fig6-data2.xlsx]

## Sheet: Sheet1
source	term_name	term_id	adjusted_p_value	negative_log10_of_adjusted_p_value	term_size	query_size	intersection_size	effective_domain_size	intersections
GO:BP	response to external stimulus	GO:0009605	1.19e-53	52.9241	2953	699	262	21331	IGHM,ATP1A2,JCHAIN,IGHA,IGLC1,C4B,PRRXL1,SEMA5B,IFIT1,IFIT2,CCL8,CTSS,SGIP1,TAC4,SCD1,CCL12,IRF7,RGR,POU2AF1,LY6A,OASL2,IFI211,IFI213,ASS1,B2M,ALCAM,BIN2,CD8A,TRIM30A,SP110,NPY,IFI27L2A,NAIP5,AQP4,CCN3,EPHA5,ZC3HAV1,BST2,IFIT3,NLRC5,CYBB,CNTN4,RTP4,SLFN2,SYK,OAS1A,PTPRC,IRF4,SLC1A3,MMP12,TREM2,SLC2A1,ADSSL1,GRIN1,CTSG,IGLC2,OAS2,SPN,CARTPT,IFIT3B,GREM1,CD6,C3AR1,SPHK1,USP18,IFITM3,OAS1B,CCR1,IL7R…
GO:BP	immune system process	GO:0002376	1.47e-51	50.8341	2743	699	248	21331	IGHM,JCHAIN,IGHA,IGLC1,C4B,PTGDS,IFIT1,SLC7A11,CCL8,CTSS,TAC4,CD22,CCL12,IRF7,POU2AF1,IGLV1,OASL2,IFI211,IFI213,ASS1,B2M,ALCAM,CD8A,TRIM30A,SP110,NPY,NAIP5,PRTN3,AQP4,CCN3,ZC3HAV1,BST2,IFIT3,NLRC5,CYBB,RTP4,SYK,OAS1A,PTPRC,IRF4,MMP12,TREM2,CTSG,IGLC2,SAMSN1,OAS2,SPN,GPR68,CARTPT,IFIT3B,GREM1,CD6,C3AR1,TNFSF10,SPHK1,LY6D,IFITM3,GPNMB,PDCD1,OAS1B,CCR1,IL7R,LTB,IFI44,SKAP2,ZBP1,RAB27A,SLFN1,CD5,VCAM…
GO:BP	defense response	GO:0006952	2.27e-45	44.6448	1722	699	183	21331	IGHM,ATP1A2,JCHAIN,IGHA,IGLC1,C4B,IFIT1,CCL8,CTSS,TAC4,SCD1,CCL12,IRF7,OASL2,IFI211,IFI213,ASS1,B2M,CD8A,TRIM30A,SP110,NPY,NAIP5,AQP4,CCN3,ZC3HAV1,BST2,IFIT3,NLRC5,CYBB,RTP4,SYK,OAS1A,PTPRC,IRF4,MMP12,TREM2,CTSG,IGLC2,OAS2,SPN,IFIT3B,CD6,C3AR1,SPHK1,USP18,IFITM3,OAS1B,CCR1,GM4951,IL7R,ZBP1,RAB27A,VCAM1,CXCL12,TAP1,NAIP2,SLFN8,TRIM30D,VSIG4,PRG2,IFI207,SGMS1,ISG15,OASL1,CORO1A,DHX58,FCGR1,RSAD2,IF…
GO:BP	response to other organism	GO:0051707	4.03e-45	44.3943	1575	699	174	21331	IGHM,JCHAIN,IGHA,IGLC1,C4B,IFIT1,IFIT2,CCL8,SCD1,CCL12,IRF7,POU2AF1,LY6A,OASL2,IFI211,IFI213,ASS1,B2M,CD8A,TRIM30A,SP110,NPY,IFI27L2A,NAIP5,AQP4,ZC3HAV1,BST2,IFIT3,NLRC5,CYBB,RTP4,SLFN2,SYK,OAS1A,PTPRC,IRF4,MMP12,TREM2,CTSG,IGLC2,OAS2,SPN,IFIT3B,CD6,USP18,IFITM3,OAS1B,CCR1,IL7R,IFI44,ZBP1,RAB27A,VCAM1,CXCL12,TAP1,NAIP2,SLFN8,TRIM30D,VSIG4,PRG2,IFI207,NOS1,SGMS1,ISG15,OASL1,CD52,CORO1A,CPEB1,DHX58…
GO:BP	response to external biotic stimulus	GO:0043207	5.29e-45	44.2768	1578	699	174	21331	IGHM,JCHAIN,IGHA,IGLC1,C4B,IFIT1,IFIT2,CCL8,SCD1,CCL12,IRF7,POU2AF1,LY6A,OASL2,IFI211,IFI213,ASS1,B2M,CD8A,TRIM30A,SP110,NPY,IFI27L2A,NAIP5,AQP4,ZC3HAV1,BST2,IFIT3,NLRC5,CYBB,RTP4,SLFN2,SYK,OAS1A,PTPRC,IRF4,MMP12,TREM2,CTSG,IGLC2,OAS2,SPN,IFIT3B,CD6,USP18,IFITM3,OAS1B,CCR1,IL7R,IFI44,ZBP1,RAB27A,VCAM1,CXCL12,TAP1,NAIP2,SLFN8,TRIM30D,VSIG4,PRG2,IFI207,NOS1,SGMS1,ISG15,OASL1,CD52,CORO1A,CPEB1,DHX58…
GO:BP	immune response	GO:0006955	4.49e-44	43.3481	1705	699	180	21331	IGHM,JCHAIN,IGHA,IGLC1,C4B,PTGDS,IFIT1,CCL8,CTSS,TAC4,CD22,CCL12,IRF7,POU2AF1,IGLV1,OASL2,IFI211,IFI213,ASS1,B2M,ALCAM,CD8A,TRIM30A,SP110,NPY,NAIP5,AQP4,ZC3HAV1,BST2,IFIT3,NLRC5,CYBB,SYK,OAS1A,PTPRC,IRF4,MMP12,TREM2,CTSG,IGLC2,SAMSN1,OAS2,SPN,CD6,C3AR1,TNFSF10,IFITM3,PDCD1,CCR1,IL7R,LTB,IFI44,ZBP1,RAB27A,CXCL12,TAP1,NAIP2,TRIM30D,VSIG4,PRG2,CD3G,IFI207,ISG15,OASL1,CORO1A,DHX58,FCGR1,RSAD2,LAX1,IF…
GO:BP	response to biotic stimulus	GO:0009607	9.07e-44	43.0426	1610	699	174	21331	IGHM,JCHAIN,IGHA,IGLC1,C4B,IFIT1,IFIT2,CCL8,SCD1,CCL12,IRF7,POU2AF1,LY6A,OASL2,IFI211,IFI213,ASS1,B2M,CD8A,TRIM30A,SP110,NPY,IFI27L2A,NAIP5,AQP4,ZC3HAV1,BST2,IFIT3,NLRC5,CYBB,RTP4,SLFN2,SYK,OAS1A,PTPRC,IRF4,MMP12,TREM2,CTSG,IGLC2,OAS2,SPN,IFIT3B,CD6,USP18,IFITM3,OAS1B,CCR1,IL7R,IFI44,ZBP1,RAB27A,VCAM1,CXCL12,TAP1,NAIP2,SLFN8,TRIM30D,VSIG4,PRG2,IFI207,NOS1,SGMS1,ISG15,OASL1,CD52,CORO1A,CPEB1,DHX58…
GO:BP	interspecies interaction between organisms	GO:0044419	1.33e-40	39.8777	1785	699	179	21331	IGHM,JCHAIN,IGHA,IGLC1,C4B,IFIT1,IFIT2,CCL8,SCD1,CCL12,IRF7,POU2AF1,LY6A,OASL2,IFI211,IFI213,ASS1,B2M,CD8A,TRIM30A,SP110,NPY,IFI27L2A,NAIP5,AQP4,ZC3HAV1,BST2,IFIT3,NLRC5,CYBB,RTP4,SLFN2,SYK,OAS1A,PTPRC,IRF4,MMP12,TREM2,CTSG,IGLC2,OAS2,SPN,IFIT3B,CD6,USP18,IFITM3,OAS1B,CCR1,IL7R,IFI44,ZBP1,RAB27A,VCAM1,CXCL12,TAP1,NAIP2,SLFN8,TRIM30D,VSIG4,PRG2,IFI207,NOS1,SGMS1,ISG15,OASL1,CD52,CORO1A,CPEB1,DHX58…
GO:BP	defense response to other organism	GO:0098542	2.63e-40	39.5808	1156	699	141	21331	IGHM,JCHAIN,IGHA,IGLC1,C4B,IFIT1,CCL8,SCD1,CCL12,IRF7,OASL2,IFI211,IFI213,ASS1,B2M,CD8A,TRIM30A,SP110,NPY,NAIP5,AQP4,ZC3HAV1,BST2,IFIT3,NLRC5,CYBB,RTP4,SYK,OAS1A,PTPRC,IRF4,MMP12,TREM2,CTSG,IGLC2,OAS2,SPN,IFIT3B,IFITM3,OAS1B,CCR1,IL7R,ZBP1,RAB27A,TAP1,NAIP2,SLFN8,TRIM30D,VSIG4,PRG2,IFI207,ISG15,OASL1,CORO1A,DHX58,FCGR1,RSAD2,IFI204,TLR7,OAS3,CASP4,GBP8,VAV1,PGLYRP1,IRAK3,APOBEC1,C1QA,HP,IFITM1,IR…
GO:BP	immune effector process	GO:0002252	6.79e-36	35.168	859	699	115	21331	IGHA,IGLC1,C4B,PTGDS,IFIT1,TAC4,IRF7,POU2AF1,OASL2,B2M,CD8A,TRIM30A,ZC3HAV1,BST2,IFIT3,NLRC5,RTP4,SYK,OAS1A,PTPRC,IRF4,MMP12,TREM2,CTSG,IGLC2,OAS2,SPN,IFIT3B,IFITM3,OAS1B,IL7R,ZBP1,RAB27A,TAP1,SLFN8,TRIM30D,VSIG4,ISG15,OASL1,CORO1A,DHX58,FCGR1,RSAD2,TLR7,OAS3,CTSC,VAV1,PGLYRP1,FCER1A,IRAK3,APOBEC1,C1QA,ITGB2,IFITM1,IL18RAP,PTPN22,HAVCR2,ICOSL,STXBP2,PTPN6,C6,MLKL,MPO,C1QB,CCL5,ANXA3,ITGAL,TRBC2,P…
GO:BP	innate immune response	GO:0045087	1.16e-32	31.9362	867	699	111	21331	IGHM,JCHAIN,IGHA,IGLC1,C4B,IFIT1,CCL8,CCL12,IRF7,OASL2,IFI211,IFI213,ASS1,B2M,TRIM30A,SP110,NPY,NAIP5,AQP4,ZC3HAV1,BST2,IFIT3,NLRC5,CYBB,SYK,OAS1A,MMP12,TREM2,IGLC2,OAS2,IFITM3,CCR1,ZBP1,RAB27A,TAP1,NAIP2,TRIM30D,VSIG4,IFI207,ISG15,OASL1,CORO1A,DHX58,FCGR1,RSAD2,IFI204,TLR7,OAS3,CASP4,GBP8,VAV1,PGLYRP1,IRAK3,C1QA,IFITM1,IRF8,IL18RAP,LCK,HAVCR2,HMGB2,STXBP2,PTPN6,IIGP1,C6,C1QB,CCL5,MNDAL,TRBC2,ALP…
GO:BP	response to stress	GO:0006950	4.39e-32	31.3576	3858	699	263	21331	IGHM,ATP1A2,JCHAIN,IGHA,IGLC1,C4B,IFIT1,SLC7A11,CCL8,CTSS,TAC4,SCD1,ADCYAP1R1,CCL12,IRF7,OASL2,PAPPA2,IFI211,IFI213,ACER2,ASS1,B2M,SLC6A2,CD8A,ABCB1A,TRIM30A,SP110,NPY,NAIP5,AQP4,CCN3,ZC3HAV1,BST2,IFIT3,NLRC5,CYBB,RTP4,SYK,OAS1A,PTPRC,IRF4,SLC1A3,CDH8,MMP12,TREM2,SLC2A1,ADSSL1,CTSG,IGLC2,OAS2,SPN,CARTPT,IFIT3B,CD6,C3AR1,SPHK1,USP18,GUCY1B1,DERL3,IFITM3,MYOF,OAS1B,CCR1,GM4951,IL7R,ZBP1,GFAP,SLC8A1…
GO:BP	cell activation	GO:0001775	8.07e-32	31.0929	1104	699	125	21331	IGHA,IGLC1,PTGDS,SLC7A11,TAC4,CD22,POU2AF1,B2M,CD8A,SYK,PTPRC,IRF4,TREM2,IGLC2,SAMSN1,SPN,CD6,SPHK1,LY6D,GPNMB,IL7R,SKAP2,RAB27A,SLFN1,CD5,VCAM1,CXCL12,VSIG4,CD3G,BMP4,CORO1A,RSAD2,LAX1,TLR7,IKZF3,CTSC,VAV1,CD79A,PGLYRP1,FCER1A,C1QA,PLEK,ITGB2,IL18RAP,LCK,THBS1,PTPN22,HAVCR2,CD2,NCKAP1L,ICOSL,STXBP2,GCLC,PTPN6,MEGF10,CCL5,FCGR4,ANXA3,ITGAL,TRBC2,PIRB,CD84,LY9,IGHD,LCP2,TREML1,CD37,CXCL10,FOXF1,IL…
GO:BP	regulation of immune system process	GO:0002682	2e-30	29.6994	1430	699	142	21331	IGHA,IGLC1,C4B,SLC7A11,CD22,CCL12,IRF7,IFI211,IFI213,B2M,CCN3,ZC3HAV1,BST2,NLRC5,SYK,PTPRC,MMP12,TREM2,CTSG,IGLC2,SAMSN1,SPN,GPR68,CARTPT,GREM1,CD6,C3AR1,SPHK1,GPNMB,PDCD1,CCR1,IL7R,ZBP1,SLFN1,CD5,VCAM1,CXCL12,TAP1,VSIG4,IFI207,ISG15,BMP4,CORO1A,DHX58,FCGR1,RSAD2,LAX1,IFI204,IKZF3,CTSC,VAV1,CD79A,PGLYRP1,FCER1A,IRAK3,C1QA,ITGB2,PLA2G7,IL18RAP,LCK,CXCL13,THBS1,PTPN22,CD8B1,HAVCR2,HMGB2,NCKAP1L,ICO…
GO:BP	positive regulation of immune system process	GO:0002684	2.48e-30	29.6058	981	699	115	21331	IGHA,IGLC1,C4B,CD22,CCL12,IRF7,IFI211,IFI213,B2M,ZC3HAV1,NLRC5,SYK,PTPRC,MMP12,TREM2,CTSG,IGLC2,SPN,GPR68,CD6,C3AR1,CCR1,IL7R,ZBP1,CD5,VCAM1,CXCL12,VSIG4,IFI207,ISG15,CORO1A,DHX58,FCGR1,RSAD2,LAX1,IFI204,CTSC,VAV1,CD79A,FCER1A,IRAK3,C1QA,ITGB2,PLA2G7,IL18RAP,LCK,CXCL13,THBS1,PTPN22,HAVCR2,HMGB2,NCKAP1L,ICOSL,STXBP2,PTPN6,C6,PGF,C1QB,CCL5,SERPINE1,MNDAL,ITGAL,TRBC2,CD84,CCL7,IGHD,LCP2,STAT1,CD37,I…
GO:BP	response to stimulus	GO:0050896	3.6e-29	28.4432	9985	699	480	21331	IGHM,ATP1A2,SYT1,JCHAIN,GPR158,LY6C2,IGHA,IGLC1,C4B,PRRXL1,PTGDS,CBLN1,SEMA5B,IFIT1,ILDR2,SLC7A11,IFIT2,CCL8,SLC6A1,CGA,CTSS,SGIP1,SLC22A8,SLC22A6,TAC4,GABRD,CD22,SCD1,ADCYAP1R1,CCL12,IRF7,RGR,POU2AF1,LY6A,IGLV1,OASL2,PAPPA2,IFI211,IFI213,SLCO1A4,ACER2,ASS1,PPP1R1A,SP100,B2M,ALCAM,SLC6A2,BIN2,TRPM1,CD8A,ABCB1A,SYT4,NNAT,TRIM30A,SP110,RNF213,NPY,IFI27L2A,OSR1,NAIP5,AQP4,CCN3,EPHA5,ZC3HAV1,NPR3,SCG…
GO:BP	cellular response to chemical stimulus	GO:0070887	1.52e-28	27.8167	3105	699	222	21331	ATP1A2,SYT1,LY6C2,IFIT1,SLC7A11,IFIT2,CCL8,CGA,CTSS,CCL12,IRF7,LY6A,IFI211,IFI213,SLCO1A4,ACER2,ASS1,B2M,BIN2,SYT4,OSR1,AQP4,CCN3,EPHA5,ZC3HAV1,IFIT3,NLRC5,CYBB,SYK,PTPRC,MMP12,TREM2,SLC2A1,ADSSL1,GRIN1,CTSG,OAS2,GPR68,IFIT3B,GREM1,CD6,C3AR1,SPHK1,GUCY1B1,DERL3,IFITM3,CASP7,MYOF,CCR1,GM4951,IL7R,ZBP1,SLC8A1,HHIP,FGFBP1,VCAM1,CXCL12,NAIP2,MAPT,IFI207,NOS1,SGMS1,BMP4,CORO1A,CPEB1,FGF12,MGARP,ITPR3,…
GO:BP	leukocyte activation	GO:0045321	1.24e-27	26.9062	984	699	111	21331	IGHA,IGLC1,PTGDS,TAC4,CD22,POU2AF1,B2M,CD8A,SYK,PTPRC,IRF4,TREM2,IGLC2,SAMSN1,SPN,CD6,SPHK1,LY6D,GPNMB,IL7R,SKAP2,RAB27A,SLFN1,CD5,VCAM1,CXCL12,VSIG4,CD3G,BMP4,CORO1A,RSAD2,LAX1,TLR7,IKZF3,CTSC,VAV1,CD79A,PGLYRP1,FCER1A,C1QA,ITGB2,IL18RAP,LCK,THBS1,PTPN22,HAVCR2,CD2,NCKAP1L,ICOSL,STXBP2,PTPN6,CCL5,FCGR4,ANXA3,ITGAL,TRBC2,PIRB,CD84,LY9,IGHD,LCP2,CD37,FOXF1,STXBP1,CD274,GPR183,RAC2,PRKCZ,FGR,JAML,B…
GO:BP	response to cytokine	GO:0034097	1.02e-26	25.9918	959	699	108	21331	IFIT1,IFIT2,CCL8,CCL12,IRF7,IFI211,IFI213,ASS1,AQP4,BST2,IFIT3,NLRC5,SYK,PTPRC,MMP12,TREM2,OAS2,IFIT3B,SPHK1,IFITM3,CCR1,GM4951,IL7R,ZBP1,VCAM1,CXCL12,IFI207,SGMS1,ISG15,CORO1A,IFI204,CASP4,GBP8,IRAK3,PTPRN,IFITM1,IRF8,IL18RAP,CXCL13,THBS1,HK2,LRAT,STXBP2,GCLC,PTPN6,IIGP1,XAF1,CCL5,MNDAL,PIRB,CCL7,PDE1B,STAT1,IFI203,IFITM6,CXCL10,FOXF1,IL17RA,IFI209,STXBP1,GBP3,CD274,IFIH1,TGTP2,BCL2,LEPR,AKAP6,C…
GO:BP	regulation of response to stimulus	GO:0048583	4.77e-26	25.3214	3947	699	253	21331	LY6C2,IGHA,IGLC1,C4B,CBLN1,SEMA5B,SLC7A11,CCL8,CGA,CTSS,CD22,ADCYAP1R1,CCL12,IRF7,LY6A,IFI211,IFI213,SP100,B2M,CD8A,ABCB1A,TRIM30A,RNF213,NPY,CCN3,EPHA5,ZC3HAV1,BST2,GARNL3,NLRC5,NKD2,SYK,PTPRC,IRF4,MMP12,TREM2,GRIN1,CTSG,IGLC2,SAMSN1,SPN,GPR68,CARTPT,GREM1,CD6,C3AR1,TNFSF10,SPHK1,USP18,DERL3,GPNMB,PDCD1,MYOF,CCR1,IL7R,ZBP1,HHIP,FGFBP1,PHF24,CXCL12,TAP1,TRIM30D,VSIG4,MAPT,IFI207,NOS1,BMP4,IER3,EP…
GO:BP	response to organic substance	GO:0010033	3.55e-24	23.4498	3420	699	226	21331	ATP1A2,LY6C2,PTGDS,IFIT1,ILDR2,SLC7A11,IFIT2,CCL8,SLC6A1,CGA,CTSS,SLC22A6,SCD1,ADCYAP1R1,CCL12,IRF7,LY6A,IFI211,IFI213,SLCO1A4,ACER2,ASS1,B2M,NNAT,OSR1,AQP4,EPHA5,ZC3HAV1,BST2,IFIT3,NLRC5,CYBB,SYK,PTPRC,SLC1A3,MMP12,TREM2,SLC2A1,GRIN1,CTSG,OAS2,GPR68,IFIT3B,GREM1,CD6,TNFSF10,SPHK1,USP18,DERL3,LY6D,IFITM3,CASP7,MYOF,CCR1,GM4951,IL7R,ZBP1,SLC8A1,HHIP,FGFBP1,VCAM1,CXCL12,NAIP2,MAPT,IFI207,NOS1,SGMS1…
GO:BP	regulation of immune response	GO:0050776	3.59e-24	23.4449	785	699	93	21331	IGHA,IGLC1,C4B,CD22,IRF7,IFI211,IFI213,B2M,BST2,NLRC5,SYK,PTPRC,MMP12,TREM2,CTSG,IGLC2,SAMSN1,SPN,C3AR1,PDCD1,CCR1,IL7R,ZBP1,TAP1,VSIG4,IFI207,DHX58,FCGR1,RSAD2,LAX1,IFI204,VAV1,CD79A,PGLYRP1,FCER1A,IRAK3,C1QA,ITGB2,IL18RAP,LCK,PTPN22,CD8B1,HAVCR2,HMGB2,NCKAP1L,ICOSL,STXBP2,PTPN6,C6,C1QB,MNDAL,FCGR4,TRBC2,CD84,IGHD,LCP2,CD37,IFI203,FOXF1,IFI209,STXBP1,CD274,RAC2,PRKCZ,FGR,BCL2,C1RA,CD3E,CEACAM1,F…
GO:BP	cellular response to cytokine stimulus	GO:0071345	3.55e-23	22.4498	841	699	95	21331	IFIT1,IFIT2,CCL8,CCL12,IRF7,IFI211,IFI213,ASS1,AQP4,IFIT3,NLRC5,SYK,PTPRC,MMP12,TREM2,OAS2,IFIT3B,SPHK1,IFITM3,CCR1,GM4951,IL7R,ZBP1,VCAM1,CXCL12,IFI207,SGMS1,CORO1A,IFI204,CASP4,GBP8,IRAK3,PTPRN,IFITM1,IRF8,IL18RAP,CXCL13,THBS1,HK2,LRAT,STXBP2,PTPN6,IIGP1,CCL5,MNDAL,PIRB,CCL7,PDE1B,STAT1,IFI203,IFITM6,CXCL10,FOXF1,IL17RA,IFI209,STXBP1,GBP3,TGTP2,LEPR,AKAP6,CSF2RB2,ACKR2,IL2RG,CEACAM1,FCER1G,EDN1…
GO:BP	positive regulation of response to stimulus	GO:0048584	3.95e-23	22.403	2304	699	173	21331	IGHA,IGLC1,C4B,CCL8,CTSS,CD22,ADCYAP1R1,CCL12,IRF7,IFI211,IFI213,B2M,CD8A,ABCB1A,TRIM30A,NPY,CCN3,ZC3HAV1,NLRC5,SYK,PTPRC,MMP12,TREM2,GRIN1,CTSG,IGLC2,SPN,GPR68,CARTPT,GREM1,CD6,C3AR1,TNFSF10,SPHK1,GPNMB,CCR1,IL7R,ZBP1,FGFBP1,CXCL12,TRIM30D,VSIG4,IFI207,NOS1,BMP4,TMOD2,DHX58,FCGR1,RSAD2,LAX1,IFI204,TLR7,CASP4,CYFIP2,DGKD,CTSC,VAV1,CD79A,FCER1A,C1QA,DCDC2A,PLEK,ITGB2,PLA2G7,IL18RAP,LCK,CXCL13,CCBE…
GO:BP	transport	GO:0006810	5.27e-23	22.2783	4595	699	272	21331	ATP1A2,SYT1,IGHA,IGLC1,ACHE,PTGDS,CBLN1,ILDR2,PPP2R2B,SLC7A11,SLC6A1,CGA,SPTBN4,CTSS,SGIP1,SLC22A8,SLC22A6,TAC4,GABRD,CD22,ADCYAP1R1,CCL12,SLC13A3,OTOP3,SLCO1A4,SP100,DOC2A,B2M,DPP6,SLC6A2,SLC6A13,BIN2,TRPM1,ABCB1A,SYT4,NNAT,MAP6,SV2B,CADPS,OSR1,PRTN3,RANBP3L,AQP4,CCN3,EPHA5,NPR3,SCG5,BST2,SLC6A20A,CYBB,NKD2,RTP4,SYK,PTPRC,SLC1A3,MMP12,TREM2,SLC2A1,GRIN1,IGLC2,OAS2,GPR68,CARTPT,GREM1,CD6,SPHK1,DE…
GO:BP	regulation of response to external stimulus	GO:0032101	5.71e-23	22.2434	944	699	101	21331	SEMA5B,CTSS,CCL12,IRF7,IFI211,IFI213,NPY,CCN3,ZC3HAV1,NLRC5,SYK,MMP12,TREM2,GRIN1,SPN,CARTPT,GREM1,CD6,C3AR1,SPHK1,USP18,CCR1,ZBP1,CXCL12,TAP1,VSIG4,IFI207,DHX58,FCGR1,IFI204,CASP4,CTSC,VAV1,PGLYRP1,FCER1A,IRAK3,PLEK,SEMA3D,TSPAN8,PLA2G7,IL18RAP,CXCL13,THBS1,PTPN22,HAVCR2,HMGB2,NCKAP1L,PGF,CCL5,SERPINE1,MNDAL,KNG2,TUBB2B,CCL7,STAT1,FABP7,CD37,IFI203,CXCL10,FOXF1,IL17RA,IFI209,GPR183,RAC2,GPR4,FGR…
GO:BP	establishment of localization	GO:0051234	4.53e-22	21.3443	4732	699	275	21331	ATP1A2,SYT1,IGHA,IGLC1,ACHE,PTGDS,CBLN1,ILDR2,PPP2R2B,SLC7A11,SLC6A1,CGA,SPTBN4,CTSS,SGIP1,SLC22A8,SLC22A6,TAC4,GABRD,CD22,ADCYAP1R1,CCL12,SLC13A3,OTOP3,SLCO1A4,SP100,DOC2A,B2M,DPP6,SLC6A2,SLC6A13,BIN2,TRPM1,ABCB1A,SYT4,NNAT,MAP6,SV2B,CADPS,OSR1,PRTN3,RANBP3L,AQP4,CCN3,EPHA5,NPR3,SCG5,BST2,SLC6A20A,CYBB,NKD2,RTP4,SYK,PTPRC,SLC1A3,MMP12,TREM2,SLC2A1,GRIN1,IGLC2,OAS2,GPR68,CARTPT,GREM1,CD6,SPHK1,DE…
GO:BP	cellular response to organic substance	GO:0071310	1.13e-21	20.947	2458	699	177	21331	ATP1A2,IFIT1,IFIT2,CCL8,CGA,CTSS,CCL12,IRF7,IFI211,IFI213,ASS1,B2M,OSR1,AQP4,EPHA5,ZC3HAV1,IFIT3,NLRC5,CYBB,SYK,PTPRC,MMP12,TREM2,CTSG,OAS2,GPR68,IFIT3B,GREM1,CD6,SPHK1,DERL3,IFITM3,CASP7,MYOF,CCR1,GM4951,IL7R,ZBP1,SLC8A1,HHIP,FGFBP1,VCAM1,CXCL12,NAIP2,IFI207,NOS1,SGMS1,BMP4,CORO1A,CPEB1,FGF12,MGARP,ITPR3,IFI204,CASP4,GBP8,CYFIP2,IRAK3,APOBEC1,PTPRN,IFITM1,IRF8,IL18RAP,CXCL13,CCBE1,THBS1,PTPN22,M…
GO:BP	localization	GO:0051179	5.36e-21	20.2708	6194	699	328	21331	ATP1A2,SYT1,GPR158,IGHA,IGLC1,ACHE,PRRXL1,PTGDS,CBLN1,SEMA5B,ILDR2,PPP2R2B,SLC7A11,CCL8,SLC6A1,CGA,SPTBN4,CTSS,PHACTR1,SGIP1,SLC22A8,SLC22A6,TAC4,GABRD,CD22,ADCYAP1R1,CCL12,SLC13A3,OTOP3,SLCO1A4,SP100,DOC2A,B2M,DPP6,SLC6A2,SLC6A13,BIN2,TRPM1,ABCB1A,SYT4,NNAT,TRIM30A,MAP6,SV2B,CADPS,OSR1,PRTN3,RANBP3L,AQP4,CCN3,EPHA5,NPR3,SCG5,BST2,SLC6A20A,CYBB,NKD2,RTP4,SYK,PTPRC,SLC1A3,MMP12,TREM2,SLC2A1,GRIN1,…
GO:BP	response to virus	GO:0009615	9.28e-21	20.0325	334	699	56	21331	IFIT1,IFIT2,IRF7,POU2AF1,OASL2,CD8A,TRIM30A,IFI27L2A,ZC3HAV1,BST2,IFIT3,NLRC5,RTP4,OAS1A,PTPRC,MMP12,OAS2,SPN,IFIT3B,IFITM3,OAS1B,ZBP1,SLFN8,TRIM30D,ISG15,OASL1,DHX58,RSAD2,TLR7,OAS3,IRAK3,APOBEC1,IFITM1,PTPN22,MLKL,CCL5,STAT1,CD37,OAS1G,IFITM6,CXCL10,IFIH1,TGTP2,BCL2,POU2F2,TLR13,APOBEC3,PLSCR1,MX2,STAT2,CLU,AIM2,CXADR,IL12RB1,MAPK11,ITGAX
GO:BP	ion transport	GO:0006811	6.13e-20	19.2126	1688	699	136	21331	ATP1A2,SYT1,SLC7A11,SLC6A1,SPTBN4,CTSS,SLC22A8,SLC22A6,GABRD,ADCYAP1R1,CCL12,SLC13A3,OTOP3,SLCO1A4,B2M,DPP6,SLC6A2,SLC6A13,TRPM1,ABCB1A,SYT4,OSR1,SLC6A20A,CYBB,SYK,PTPRC,SLC1A3,TREM2,SLC2A1,GRIN1,CCR1,SLC8A1,GRIA4,CXCL12,GABRR3,KCNT1,NOS1,BMP4,CORO1A,FGF12,ITPR3,KCNJ10,FCER1A,TRPM6,LCK,CAR4,THBS1,PTPN22,MLC1,SLC16A11,SLC30A10,PLSCR2,CYP4F18,CLIC5,PTPN6,ATP10A,SLC23A2,TMEM37,CLCA3A1,CCL5,CACNA1B,C…
GO:BP	response to bacterium	GO:0009617	1.25e-19	18.9024	905	699	93	21331	IGHM,JCHAIN,IGHA,IGLC1,IFIT1,SCD1,CCL12,LY6A,IFI211,ASS1,B2M,TRIM30A,SP110,NPY,NAIP5,IFIT3,NLRC5,SLFN2,SYK,TREM2,CTSG,IGLC2,OAS2,SPN,CD6,USP18,IL7R,IFI44,VCAM1,NAIP2,PRG2,NOS1,SGMS1,ISG15,CD52,CPEB1,DHX58,FCGR1,IFI204,GBP8,IKZF3,PGLYRP1,IRAK3,HP,IRF8,PLAC8,CXCL13,PTPN22,LRAT,HAVCR2,PLSCR2,HMGB2,IIGP1,MPO,CCL5,SERPINE1,MNDAL,FCGR4,ANXA3,TRBC2,IGHD,UPK1B,CXCL10,GBP3,CD274,PLSCR4,CYP2E1,TGTP2,FGR,BM…
GO:BP	regulation of multicellular organismal process	GO:0051239	2.31e-19	18.6373	3303	699	209	21331	ATP1A2,SYT1,ACHE,PTGDS,CBLN1,SEMA5B,CGA,SPTBN4,CTSS,PHACTR1,SGIP1,TAC4,SCD1,IRF7,POU2AF1,IFI211,SP100,B2M,ABCB1A,SYT4,TRIM30A,MAP6,OSR1,NAIP5,AQP4,CCN3,ZC3HAV1,NPR3,BST2,CYBB,CNTN4,SYK,PTPRC,IRF4,MMP12,TREM2,GRIN1,OAS2,SPN,GPR68,CARTPT,GREM1,CD6,C3AR1,SPHK1,GPNMB,PDCD1,CCR1,IL7R,LTB,GFAP,SLC8A1,HHIP,SPOCK1,FGFBP1,SHTN1,CXCL12,WNT6,VSIG4,MAPT,PRG2,NOS1,ISG15,BMP4,CPEB1,DHX58,CRMP1,FGF12,RSAD2,IFI2…
GO:BP	positive regulation of response to external stimulus	GO:0032103	1.18e-18	17.9279	421	699	60	21331	CTSS,IRF7,IFI211,IFI213,NPY,ZC3HAV1,NLRC5,MMP12,TREM2,CD6,C3AR1,CCR1,ZBP1,CXCL12,IFI207,DHX58,FCGR1,IFI204,CTSC,VAV1,FCER1A,PLA2G7,IL18RAP,CXCL13,THBS1,HAVCR2,HMGB2,NCKAP1L,PGF,CCL5,SERPINE1,MNDAL,TUBB2B,CCL7,IFI203,CXCL10,IL17RA,IFI209,RAC2,GPR4,BMP6,FCER1G,EDN1,IFI206,C3,GBP5,ABCC1,CXCR4,CXCR2,PLSCR1,PLA2G4A,NFKBIZ,LILRA5,IFI208,PDE5A,AIM2,CCL2,F7,IRGM1,PTK2B
GO:BP	cell surface receptor signaling pathway	GO:0007166	1.25e-18	17.9014	2705	699	181	21331	IGHA,IGLC1,CBLN1,SEMA5B,CCL8,CD22,ADCYAP1R1,CCL12,IRF7,SP100,TRPM1,CD8A,RNF213,CCN3,EPHA5,NLRC5,NKD2,SYK,PTPRC,MMP12,TREM2,GRIN1,IGLC2,OAS2,SPN,GREM1,CD6,C3AR1,TNFSF10,SPHK1,IFITM3,MYOF,CCR1,IL7R,ZBP1,HHIP,FGFBP1,SHTN1,GRIA4,CXCL12,WNT6,VIPR2,CD3G,ISG15,BMP4,CORO1A,CRMP1,FGF12,FCGR1,LAX1,CASP4,CYFIP2,DGKD,ITGB7,VAV1,CD79A,FCER1A,IRAK3,PTPRN,DCDC2A,HP,PLEK,SEMA3D,ITGB2,IFITM1,IL18RAP,ADGRG5,LCK,CX…
GO:BP	regulation of biological quality	GO:0065008	2.28e-18	17.6421	3916	699	232	21331	ATP1A2,SYT1,SCGN,ACHE,CBLN1,SEMA5B,ILDR2,SLC7A11,SLC6A1,CGA,SPTBN4,CTSS,SGIP1,TAC4,GABRD,SCD1,ADCYAP1R1,CCL12,SP100,DOC2A,B2M,DPP6,SLC6A2,TRPM1,ABCB1A,SYT4,NNAT,CADPS,NPY,AQP4,CCN3,EPHA5,NPR3,SCG5,SYK,PTPRC,IRF4,CDH8,TREM2,SLC2A1,GRIN1,OAS2,GPR68,CARTPT,C3AR1,SPHK1,CCR1,IL7R,CYTL1,GFAP,SLC8A1,RAB27A,VCAM1,TSPOAP1,SHTN1,GRIA4,CXCL12,GABRR3,MAPT,IDE,NOS1,ISG15,CD52,NRXN3,BMP4,CORO1A,CPEB1,TMOD2,CIR…
GO:BP	defense response to virus	GO:0051607	3e-18	17.5236	263	699	47	21331	IFIT1,IRF7,OASL2,CD8A,TRIM30A,ZC3HAV1,BST2,IFIT3,NLRC5,RTP4,OAS1A,PTPRC,MMP12,OAS2,SPN,IFIT3B,IFITM3,OAS1B,ZBP1,SLFN8,TRIM30D,ISG15,OASL1,DHX58,RSAD2,TLR7,OAS3,APOBEC1,IFITM1,PTPN22,MLKL,CCL5,STAT1,CD37,OAS1G,IFITM6,CXCL10,IFIH1,BCL2,APOBEC3,PLSCR1,MX2,STAT2,AIM2,CXADR,IL12RB1,ITGAX
GO:BP	positive regulation of biological process	GO:0048518	4.84e-18	17.3154	6323	699	324	21331	SYT1,SCGN,JCHAIN,IGHA,IGLC1,ACHE,C4B,CBLN1,SEMA5B,PPP2R2B,IFIT2,CCL8,SLC6A1,CGA,SPTBN4,CTSS,SGIP1,TAC4,CD22,SCD1,ADCYAP1R1,CCL12,IRF7,POU2AF1,IFI211,IFI213,ACER2,ASS1,B2M,DPP6,SLC6A13,CD8A,ABCB1A,SYT4,NNAT,TRIM30A,SP110,MAP6,CADPS,NPY,OSR1,NAIP5,CCN3,EPHA5,ZC3HAV1,NPR3,NLRC5,CYBB,NKD2,SYK,PTPRC,IRF4,SLC1A3,MMP12,CD53,TREM2,GRIN1,CTSG,IGLC2,SPN,GPR68,CARTPT,GREM1,CD6,C3AR1,TNFSF10,SPHK1,GPNMB,PDCD…
GO:BP	response to interferon-beta	GO:0035456	8.69e-18	17.061	63	699	25	21331	IFIT1,IFI211,IFI213,BST2,IFIT3,IFITM3,GM4951,IFI207,IFI204,IFITM1,IIGP1,XAF1,MNDAL,STAT1,IFI203,IFITM6,IFI209,GBP3,TGTP2,IFI206,PLSCR1,GM12185,IFI208,AIM2,IRGM1
GO:BP	lymphocyte activation	GO:0046649	2.56e-17	16.5924	821	699	84	21331	IGHA,IGLC1,CD22,POU2AF1,B2M,CD8A,SYK,PTPRC,IRF4,IGLC2,SAMSN1,SPN,CD6,LY6D,GPNMB,IL7R,SKAP2,RAB27A,SLFN1,CD5,VCAM1,CXCL12,VSIG4,CD3G,BMP4,CORO1A,RSAD2,LAX1,IKZF3,VAV1,CD79A,PGLYRP1,ITGB2,LCK,PTPN22,HAVCR2,CD2,NCKAP1L,ICOSL,PTPN6,CCL5,ITGAL,TRBC2,LY9,IGHD,CD274,GPR183,RAC2,PRKCZ,FGR,JAML,BCL2,LEPR,TNFSF8,CD3E,IL2RG,CEACAM1,FCER1G,DPP4,POU2F2,CTPS,LFNG,LYN,CLEC4D,SPI1,DOCK2,RASAL3,ICAM1,NFKBIZ,LCP1,…
GO:BP	positive regulation of immune response	GO:0050778	3.31e-17	16.4804	613	699	71	21331	IGHA,IGLC1,C4B,CD22,IRF7,IFI211,IFI213,B2M,NLRC5,SYK,PTPRC,MMP12,CTSG,IGLC2,SPN,C3AR1,ZBP1,VSIG4,IFI207,FCGR1,RSAD2,LAX1,IFI204,VAV1,CD79A,FCER1A,C1QA,ITGB2,IL18RAP,LCK,PTPN22,HAVCR2,HMGB2,NCKAP1L,ICOSL,STXBP2,PTPN6,C6,C1QB,MNDAL,TRBC2,IGHD,LCP2,IFI203,IFI209,STXBP1,CD274,PRKCZ,FGR,BCL2,C1RA,CD3E,CEACAM1,FCER1G,FCRL5,IFI206,C3,LYN,GBP5,ELANE,PLSCR1,PLA2G4A,NFKBIZ,IGHG3,IFI208,IL18R1,AIM2,PRNP,IL1…
GO:BP	regulation of cell communication	GO:0010646	4.73e-17	16.3248	3330	699	204	21331	SYT1,SCGN,LY6C2,CBLN1,SLC7A11,CCL8,SLC6A1,CGA,CD22,ADCYAP1R1,CCL12,IRF7,LY6A,SP100,CD8A,SYT4,NNAT,TRIM30A,RNF213,CCN3,EPHA5,ZC3HAV1,SCG5,GARNL3,NLRC5,NKD2,SYK,PTPRC,IRF4,SLC1A3,MMP12,TREM2,GRIN1,GPR68,CARTPT,GREM1,TNFSF10,SPHK1,GUCY1B1,GPNMB,MYOF,CCR1,IL7R,ZBP1,GFAP,HHIP,FGFBP1,PHF24,GRIA4,CXCL12,TRIM30D,MAPT,NOS1,NRXN3,BMP4,CPEB1,EPS8L1,TMOD2,DHX58,FGF12,RSAD2,ITPR3,LAX1,TLR7,CASP4,CYFIP2,DGKD,K…
GO:BP	regulation of signaling	GO:0023051	8.06e-17	16.0939	3345	699	204	21331	SYT1,SCGN,LY6C2,ACHE,CBLN1,SLC7A11,CCL8,SLC6A1,CGA,CD22,ADCYAP1R1,CCL12,IRF7,LY6A,SP100,CD8A,SYT4,NNAT,TRIM30A,RNF213,CCN3,EPHA5,ZC3HAV1,SCG5,GARNL3,NLRC5,NKD2,SYK,PTPRC,IRF4,SLC1A3,MMP12,TREM2,GRIN1,GPR68,CARTPT,GREM1,TNFSF10,SPHK1,GUCY1B1,GPNMB,MYOF,CCR1,IL7R,ZBP1,GFAP,HHIP,FGFBP1,PHF24,GRIA4,CXCL12,TRIM30D,MAPT,NOS1,NRXN3,BMP4,CPEB1,EPS8L1,TMOD2,DHX58,FGF12,RSAD2,ITPR3,LAX1,TLR7,CASP4,CYFIP2,D…
GO:BP	positive regulation of multicellular organismal process	GO:0051240	4.47e-16	15.3497	1947	699	140	21331	SYT1,ACHE,CBLN1,SPTBN4,SGIP1,TAC4,SCD1,IRF7,POU2AF1,IFI211,B2M,ABCB1A,SYT4,MAP6,OSR1,NAIP5,ZC3HAV1,CYBB,SYK,PTPRC,IRF4,MMP12,TREM2,GRIN1,SPN,GPR68,CARTPT,GREM1,CD6,C3AR1,SPHK1,CCR1,IL7R,LTB,GFAP,SLC8A1,FGFBP1,SHTN1,CXCL12,WNT6,MAPT,PRG2,NOS1,ISG15,BMP4,CPEB1,DHX58,RSAD2,IFI204,TLR7,CASP4,FCER1A,IRAK3,SH3GL3,PLEK,ITGB2,IFITM1,IRF8,PLAC8,LCK,CCBE1,THBS1,PTPN22,HK2,HAVCR2,HMGB2,CD2,NCKAP1L,ICOSL,C6,…
GO:BP	regulation of cytokine production	GO:0001817	9.35e-16	15.029	716	699	75	21331	IRF7,POU2AF1,IFI211,B2M,TRIM30A,NAIP5,AQP4,ZC3HAV1,BST2,CYBB,SYK,PTPRC,IRF4,MMP12,TREM2,SPN,CD6,C3AR1,SPHK1,GPNMB,LTB,VSIG4,PRG2,ISG15,DHX58,RSAD2,IFI204,TLR7,CASP4,PGLYRP1,FCER1A,IRAK3,IRF8,ADAM33,CCBE1,THBS1,PTPN22,HAVCR2,HMGB2,CD2,NCKAP1L,ICOSL,PTPN6,CCL5,SERPINE1,MNDAL,CD84,LY9,STAT1,IL17RA,CD274,IFIH1,PRKCZ,FGR,CD3E,CEACAM1,FCER1G,POU2F2,SIGIRR,C3,LYN,GBP5,ELANE,CD14,LILRA5,CLU,HPSE,IL1R2,IN…
GO:BP	T cell activation	GO:0042110	1.12e-15	14.949	497	699	61	21331	B2M,CD8A,SYK,PTPRC,IRF4,SPN,CD6,GPNMB,IL7R,RAB27A,SLFN1,CD5,VCAM1,CXCL12,VSIG4,CD3G,BMP4,CORO1A,RSAD2,LAX1,VAV1,LCK,PTPN22,HAVCR2,CD2,NCKAP1L,ICOSL,PTPN6,CCL5,ITGAL,LY9,CD274,GPR183,RAC2,PRKCZ,JAML,BCL2,LEPR,TNFSF8,CD3E,IL2RG,CEACAM1,FCER1G,DPP4,CTPS,LFNG,CLEC4D,DOCK2,RASAL3,ICAM1,NFKBIZ,LCP1,SIRPB1C,IL18R1,PDE5A,CXADR,CHD7,PRNP,IL12RB1,LMBR1L,CCL2
GO:BP	regulation of transport	GO:0051049	2.94e-15	14.5319	1925	699	137	21331	ATP1A2,SYT1,SLC7A11,SLC6A1,SPTBN4,CTSS,SGIP1,TAC4,CD22,ADCYAP1R1,CCL12,SLCO1A4,SP100,DOC2A,B2M,DPP6,ABCB1A,SYT4,NNAT,CADPS,OSR1,PRTN3,CCN3,EPHA5,SCG5,BST2,CYBB,SYK,PTPRC,TREM2,GRIN1,OAS2,GPR68,CARTPT,GREM1,SPHK1,DERL3,CCR1,GFAP,SLC8A1,RAB27A,CXCL12,MAPT,NOS1,NRXN3,BMP4,CORO1A,FGF12,FCGR1,RSAD2,DGKD,KCNJ10,FCER1A,SH3GL3,ITGB2,THBS1,PTPN22,MLC1,HK2,LRAT,HAVCR2,SLC30A10,CYP4F18,NCKAP1L,STXBP2,GCLC,C…
GO:BP	response to chemical	GO:0042221	2.94e-15	14.5312	5561	699	287	21331	ATP1A2,SYT1,LY6C2,PRRXL1,PTGDS,SEMA5B,IFIT1,ILDR2,SLC7A11,IFIT2,CCL8,SLC6A1,CGA,CTSS,SLC22A8,SLC22A6,SCD1,ADCYAP1R1,CCL12,IRF7,LY6A,IFI211,IFI213,SLCO1A4,ACER2,ASS1,B2M,ALCAM,SLC6A2,BIN2,ABCB1A,SYT4,NNAT,NPY,OSR1,AQP4,CCN3,EPHA5,ZC3HAV1,BST2,IFIT3,NLRC5,CYBB,CNTN4,RTP4,SYK,PTPRC,SLC1A3,MMP12,TREM2,SLC2A1,ADSSL1,GRIN1,CTSG,OAS2,GPR68,CARTPT,IFIT3B,GREM1,CD6,C3AR1,TNFSF10,SPHK1,USP18,GUCY1B1,DERL3,…
GO:BP	inflammatory response	GO:0006954	5.72e-15	14.2424	756	699	76	21331	C4B,CCL8,CTSS,TAC4,CCL12,ASS1,NAIP5,CCN3,CYBB,SYK,TREM2,SPN,CD6,C3AR1,SPHK1,USP18,CCR1,ZBP1,VCAM1,NAIP2,SGMS1,FCGR1,TLR7,CASP4,CTSC,PGLYRP1,FCER1A,C1QA,HP,ITGB2,PLA2G7,IL18RAP,CXCL13,THBS1,HAVCR2,HMGB2,CCL5,SERPINE1,KNG2,CCL7,CXCL10,FOXF1,IL17RA,GPR4,PRKCZ,BMP6,ACKR2,FCER1G,TLR13,SIGIRR,SLC7A2,C3,NCF1,NAMPT,LYN,GBP5,ABCC1,ELANE,CXCR2,PLSCR1,ADRB2,PLA2G4A,ICAM1,CD14,NFKBIZ,LILRA5,CLU,ADCY1,IL1R2,I…
GO:BP	positive regulation of cytokine production	GO:0001819	7.29e-15	14.1373	456	699	57	21331	IRF7,POU2AF1,IFI211,B2M,NAIP5,ZC3HAV1,CYBB,SYK,PTPRC,IRF4,MMP12,TREM2,SPN,CD6,C3AR1,SPHK1,LTB,PRG2,DHX58,RSAD2,IFI204,TLR7,CASP4,FCER1A,IRF8,CCBE1,THBS1,PTPN22,HAVCR2,HMGB2,CD2,ICOSL,CCL5,SERPINE1,MNDAL,LY9,STAT1,IL17RA,CD274,IFIH1,PRKCZ,FGR,CD3E,FCER1G,POU2F2,C3,GBP5,ELANE,CD14,LILRA5,CLU,HPSE,IL18R1,AIM2,IL12RB1,CCL2,MAPK11
GO:BP	regulation of localization	GO:0032879	7.7e-15	14.1137	2886	699	179	21331	ATP1A2,SYT1,SEMA5B,SLC7A11,SLC6A1,SPTBN4,CTSS,PHACTR1,SGIP1,TAC4,CD22,ADCYAP1R1,CCL12,SLCO1A4,SP100,DOC2A,B2M,DPP6,ABCB1A,SYT4,NNAT,TRIM30A,CADPS,OSR1,PRTN3,CCN3,EPHA5,SCG5,BST2,CYBB,NKD2,SYK,PTPRC,MMP12,TREM2,GRIN1,OAS2,SPN,GPR68,CARTPT,GREM1,C3AR1,SPHK1,DERL3,GPNMB,CCR1,GFAP,SLC8A1,RAB27A,FGFBP1,SHTN1,CXCL12,TRIM30D,MAPT,NOS1,NRXN3,BMP4,CORO1A,CPEB1,CRMP1,FGF12,FCGR1,RSAD2,ITPR3,DGKD,KCNJ10,DCL…
GO:BP	signaling	GO:0023052	8.3e-15	14.0812	7169	699	344	21331	SYT1,SCGN,GPR158,LY6C2,IGHA,IGLC1,ACHE,CBLN1,SEMA5B,ILDR2,SLC7A11,CCL8,SLC6A1,CGA,SPTBN4,TAC4,GABRD,CD22,ADCYAP1R1,CCL12,IRF7,RGR,LY6A,SLCO1A4,ACER2,PPP1R1A,SP100,DOC2A,DPP6,SLC6A2,TRPM1,CD8A,SYT4,NNAT,TRIM30A,SV2B,CADPS,RNF213,NPY,IFI27L2A,CCN3,EPHA5,ZC3HAV1,NPR3,SCG5,GARNL3,NLRC5,CYBB,NKD2,SYK,PTPRC,IRF4,SLC1A3,CDH8,MMP12,TREM2,GRIN1,IGLC2,OAS2,SPN,MAPK12,GPR68,CARTPT,GREM1,CD6,C3AR1,TNFSF10,SP…
GO:BP	myeloid leukocyte activation	GO:0002274	8.97e-15	14.047	230	699	40	21331	PTGDS,TAC4,SYK,IRF4,TREM2,SPHK1,VSIG4,TLR7,CTSC,FCER1A,C1QA,ITGB2,IL18RAP,THBS1,HAVCR2,STXBP2,CCL5,FCGR4,ANXA3,PIRB,CD84,LCP2,CD37,FOXF1,STXBP1,RAC2,FGR,FCER1G,SLC7A2,NAMPT,LYN,CLEC4D,SPI1,DOCK2,CD300LF,CXCR2,PLSCR1,PLA2G4A,CLU,UBD
GO:BP	biological adhesion	GO:0022610	1e-14	13.9991	1375	699	109	21331	ACHE,CBLN1,SLC7A11,ACER2,ASS1,ALCAM,AQP4,CCN3,EPHA5,CNTN4,SYK,PTPRC,CDH8,MMP12,SPN,GREM1,CD6,SNED1,GPNMB,IL7R,SPOCK1,SLFN1,CD5,VCAM1,COL13A1,CXCL12,VSIG4,NRXN3,BMP4,BCAN,CORO1A,LAX1,CYFIP2,ITGB7,PARVG,VAV1,VMP1,PLEK,ITGB2,MSLN,LCK,CXCL13,THBS1,LAMA1,PTPN22,CD33,HAVCR2,CD2,NCKAP1L,ICOSL,PTPN6,MEGF10,CCL5,SERPINE1,DST,ITGAL,GLDN,LY9,FOXF1,STXBP1,ASTN1,GBP3,CD274,RAC2,GPR4,PRKCZ,JAML,BCL2,TTYH1,BMP6…
GO:BP	cellular response to stimulus	GO:0051716	1.38e-14	13.8615	8344	699	384	21331	ATP1A2,SYT1,GPR158,LY6C2,IGHA,IGLC1,CBLN1,SEMA5B,IFIT1,SLC7A11,IFIT2,CCL8,CGA,CTSS,TAC4,GABRD,CD22,ADCYAP1R1,CCL12,IRF7,RGR,LY6A,IFI211,IFI213,SLCO1A4,ACER2,ASS1,PPP1R1A,SP100,B2M,BIN2,TRPM1,CD8A,SYT4,TRIM30A,RNF213,NPY,IFI27L2A,OSR1,AQP4,CCN3,EPHA5,ZC3HAV1,NPR3,SCG5,GARNL3,IFIT3,NLRC5,CYBB,NKD2,SYK,PTPRC,IRF4,MMP12,TREM2,SLC2A1,ADSSL1,GRIN1,CTSG,IGLC2,OAS2,SPN,MAPK12,GPR68,CARTPT,IFIT3B,GREM1,CD…
GO:BP	cell communication	GO:0007154	1.72e-14	13.7633	7228	699	345	21331	SYT1,SCGN,GPR158,LY6C2,IGHA,IGLC1,CBLN1,SEMA5B,ILDR2,SLC7A11,CCL8,SLC6A1,CGA,SPTBN4,TAC4,GABRD,CD22,ADCYAP1R1,CCL12,IRF7,RGR,LY6A,SLCO1A4,ACER2,PPP1R1A,SP100,DOC2A,DPP6,SLC6A2,TRPM1,CD8A,SYT4,NNAT,TRIM30A,SV2B,CADPS,RNF213,NPY,IFI27L2A,CCN3,EPHA5,ZC3HAV1,NPR3,SCG5,GARNL3,NLRC5,CYBB,NKD2,SYK,PTPRC,IRF4,SLC1A3,CDH8,MMP12,TREM2,SLC2A1,GRIN1,IGLC2,OAS2,SPN,MAPK12,GPR68,CARTPT,GREM1,CD6,C3AR1,TNFSF10,…
GO:BP	regulation of cell activation	GO:0050865	1.89e-14	13.7245	704	699	72	21331	IGHA,IGLC1,SYK,PTPRC,TREM2,IGLC2,SAMSN1,SPN,CD6,SPHK1,GPNMB,IL7R,SLFN1,CD5,VCAM1,VSIG4,BMP4,CORO1A,LAX1,IKZF3,CTSC,PGLYRP1,FCER1A,PLEK,ITGB2,LCK,THBS1,PTPN22,HAVCR2,NCKAP1L,ICOSL,STXBP2,GCLC,PTPN6,CCL5,ITGAL,TRBC2,CD84,IGHD,CD37,FOXF1,STXBP1,CD274,GPR183,RAC2,PRKCZ,FGR,BCL2,CD3E,IL2RG,CEACAM1,FCER1G,ALOX12,DPP4,SLC7A2,LYN,CLEC4D,CD300LF,PLSCR1,ADRB2,RASAL3,PLA2G4A,NFKBIZ,LILRA5,IGHG3,SIRPB1C,INPP…
GO:BP	cytokine-mediated signaling pathway	GO:0019221	2.28e-14	13.6415	423	699	54	21331	CCL8,CCL12,IRF7,NLRC5,SYK,PTPRC,MMP12,TREM2,OAS2,SPHK1,IFITM3,CCR1,IL7R,ZBP1,CXCL12,CASP4,IRAK3,PTPRN,IFITM1,IL18RAP,CXCL13,PTPN6,IIGP1,CCL5,PIRB,CCL7,STAT1,IFITM6,CXCL10,IL17RA,LEPR,CSF2RB2,ACKR2,IL2RG,CEACAM1,FCER1G,IL9R,SIGIRR,PARP14,SPI1,CD300LF,CXCR4,CXCR2,CSF3R,STAT2,CSF2RB,CRLF1,IL1R2,IL18R1,AIM2,IL12RB1,CCL2,IRGM1,PTK2B
GO:BP	cytokine production	GO:0001816	2.47e-14	13.6072	793	699	77	21331	IRF7,POU2AF1,IFI211,B2M,TRIM30A,NAIP5,AQP4,ZC3HAV1,BST2,CYBB,SYK,PTPRC,IRF4,MMP12,TREM2,SPN,CD6,C3AR1,SPHK1,GPNMB,LTB,VSIG4,PRG2,ISG15,DHX58,RSAD2,IFI204,TLR7,CASP4,PGLYRP1,FCER1A,IRAK3,IRF8,IL18RAP,ADAM33,CCBE1,THBS1,PTPN22,HAVCR2,HMGB2,CD2,NCKAP1L,ICOSL,PTPN6,CCL5,SERPINE1,MNDAL,CD84,LY9,LCP2,STAT1,IL17RA,CD274,IFIH1,PRKCZ,FGR,CD3E,CEACAM1,FCER1G,POU2F2,SIGIRR,C3,LYN,GBP5,ELANE,CD14,LILRA5,CLU,…
GO:BP	leukocyte mediated immunity	GO:0002443	2.99e-14	13.525	470	699	57	21331	IGHA,IGLC1,C4B,PTGDS,TAC4,IRF7,B2M,CD8A,BST2,SYK,PTPRC,CTSG,IGLC2,SPN,IL7R,RAB27A,TAP1,CORO1A,FCGR1,RSAD2,CTSC,VAV1,FCER1A,C1QA,ITGB2,IL18RAP,HAVCR2,ICOSL,STXBP2,PTPN6,C6,C1QB,ANXA3,TRBC2,PIRB,CD84,IGHD,FOXF1,STXBP1,RAC2,PRKCZ,FGR,C1RA,CEACAM1,FCER1G,DPP4,POU2F2,C3,NCF1,LYN,ELANE,ICAM1,IGHG3,CLEC2D,INPP5D,IL18R1,CCL2
GO:BP	system development	GO:0048731	3.87e-14	13.4121	4840	699	256	21331	ATP1A2,SYT1,ACHE,PRRXL1,CBLN1,SEMA5B,ILDR2,SLC7A11,CGA,SPTBN4,PHACTR1,SCD1,CCL12,POU2AF1,PAPPA2,ASS1,SP100,B2M,ALCAM,TRPM1,CD8A,ABCB1A,SYT4,NNAT,MAP6,RNF213,NPY,OSR1,PRTN3,CCN3,EPHA5,NPR3,NEBL,CYBB,CNTN4,SYK,PTPRC,IRF4,SLC1A3,TREM2,SLC2A1,GRIN1,OAS2,COL25A1,CYP4A12B,SPN,GPR68,CARTPT,GREM1,C3AR1,TNFSF10,SPHK1,LY6D,CASP7,GPNMB,PDCD1,CCR1,IL7R,LTB,MTHFD1L,CYTL1,GFAP,SLC8A1,HHIP,SPOCK1,FGFBP1,VCAM1,C…
GO:BP	cell adhesion	GO:0007155	4.29e-14	13.368	1363	699	107	21331	ACHE,CBLN1,SLC7A11,ACER2,ASS1,ALCAM,AQP4,CCN3,EPHA5,CNTN4,SYK,PTPRC,CDH8,MMP12,SPN,GREM1,CD6,SNED1,GPNMB,IL7R,SPOCK1,SLFN1,CD5,VCAM1,COL13A1,CXCL12,VSIG4,NRXN3,BMP4,BCAN,CORO1A,LAX1,CYFIP2,ITGB7,PARVG,VAV1,VMP1,PLEK,ITGB2,MSLN,LCK,CXCL13,THBS1,LAMA1,PTPN22,CD33,HAVCR2,CD2,NCKAP1L,ICOSL,PTPN6,MEGF10,CCL5,SERPINE1,DST,ITGAL,GLDN,LY9,FOXF1,STXBP1,ASTN1,CD274,RAC2,GPR4,PRKCZ,JAML,BCL2,TTYH1,BMP6,CD3E…
GO:BP	cell-cell signaling	GO:0007267	9.49e-14	13.0229	1561	699	116	21331	SYT1,SCGN,LY6C2,CBLN1,ILDR2,SLC7A11,SLC6A1,CGA,GABRD,LY6A,DOC2A,SLC6A2,SYT4,NNAT,SV2B,CADPS,RNF213,CCN3,EPHA5,SCG5,NKD2,SYK,SLC1A3,CDH8,GRIN1,GPR68,CARTPT,GREM1,SPHK1,GUCY1B1,GPNMB,CCR1,GFAP,FGFBP1,PHF24,GRIA4,CXCL12,WNT6,GABRR3,MAPT,NOS1,NRXN3,BMP4,CPEB1,TMOD2,FGF12,ITPR3,KCNJ10,FCER1A,PTPRN,DCDC2A,CXCL13,HAVCR2,STXBP2,FGF7,CCL5,CACNA1B,TUBB2B,PIRB,SYT10,LCP2,BEGAIN,ABCC4,CACNA1A,STXBP1,TRPM2,IF…
GO:BP	adaptive immune response	GO:0002250	1.31e-13	12.8817	532	699	60	21331	IGHM,JCHAIN,IGHA,IGLC1,C4B,CTSS,IRF7,B2M,ALCAM,CD8A,SYK,PTPRC,IRF4,IGLC2,SAMSN1,SPN,C3AR1,PDCD1,IL7R,RAB27A,TAP1,CD3G,FCGR1,RSAD2,LAX1,CTSC,CD79A,FCER1A,C1QA,IL18RAP,CD8B1,HAVCR2,ICOSL,PTPN6,C6,C1QB,TRBC2,PIRB,LY9,IGHD,CD274,GPR183,PRKCZ,C1RA,CD3E,CEACAM1,FCER1G,DPP4,POU2F2,C3,LYN,CLEC4D,PLA2G4A,ICAM1,NFKBIZ,IGHG3,INPP5D,IL18R1,IL12RB1,PTK2B
GO:BP	regulation of defense response	GO:0031347	1.51e-13	12.8219	614	699	65	21331	CTSS,IRF7,IFI211,IFI213,CCN3,ZC3HAV1,NLRC5,MMP12,TREM2,SPN,CD6,SPHK1,USP18,CCR1,ZBP1,TAP1,VSIG4,IFI207,DHX58,FCGR1,IFI204,CASP4,CTSC,VAV1,PGLYRP1,FCER1A,IRAK3,IL18RAP,PTPN22,HAVCR2,HMGB2,CCL5,SERPINE1,MNDAL,STAT1,CD37,IFI203,FOXF1,IL17RA,IFI209,GPR4,FGR,CEACAM1,FCER1G,LRP8,SLC7A2,IFI206,C3,PARP14,APOBEC3,LYN,GBP5,ABCC1,PLSCR1,ADRB2,PLA2G4A,NFKBIZ,LILRA5,IL1R2,CLEC2D,IFI208,PDE5A,AIM2,IL12RB1,IRGM1
GO:BP	anatomical structure development	GO:0048856	3.03e-13	12.5184	5958	699	295	21331	ATP1A2,SYT1,ACHE,PRRXL1,CBLN1,SEMA5B,ILDR2,SLC7A11,CCL8,CGA,SPTBN4,PHACTR1,SCD1,ADCYAP1R1,CCL12,POU2AF1,PAPPA2,ASS1,SP100,B2M,ALCAM,TRPM1,CD8A,ABCB1A,SYT4,NNAT,ALDOC,MAP6,RNF213,NPY,OSR1,PRTN3,CCN3,EPHA5,NPR3,NEBL,CYBB,CNTN4,SYK,PTPRC,IRF4,SLC1A3,CDH8,MMP12,CD53,TREM2,SLC2A1,GRIN1,OAS2,COL25A1,CYP4A12B,SPN,MAPK12,GPR68,PAQR5,CARTPT,GREM1,C3AR1,TNFSF10,SPHK1,LY6D,CASP7,GPNMB,PDCD1,MYOF,CCR1,IL7R,L…
GO:BP	regulation of leukocyte activation	GO:0002694	3.54e-13	12.451	658	699	67	21331	IGHA,IGLC1,SYK,PTPRC,TREM2,IGLC2,SAMSN1,SPN,CD6,SPHK1,GPNMB,IL7R,SLFN1,CD5,VCAM1,VSIG4,BMP4,CORO1A,LAX1,IKZF3,CTSC,PGLYRP1,FCER1A,ITGB2,LCK,THBS1,PTPN22,HAVCR2,NCKAP1L,ICOSL,STXBP2,PTPN6,CCL5,ITGAL,TRBC2,CD84,IGHD,CD37,FOXF1,STXBP1,CD274,GPR183,RAC2,PRKCZ,FGR,BCL2,CD3E,IL2RG,CEACAM1,FCER1G,DPP4,SLC7A2,LYN,CLEC4D,CD300LF,PLSCR1,RASAL3,PLA2G4A,NFKBIZ,IGHG3,SIRPB1C,INPP5D,IRS2,PDE5A,PRNP,IL12RB1,CCL2
GO:BP	developmental process	GO:0032502	3.68e-13	12.4341	6516	699	315	21331	ATP1A2,SYT1,ACHE,PRRXL1,CBLN1,SEMA5B,ILDR2,SLC7A11,CCL8,CGA,SPTBN4,PHACTR1,SGIP1,SCD1,ADCYAP1R1,CCL12,POU2AF1,PAPPA2,ASS1,SP100,B2M,ALCAM,TRPM1,CD8A,ABCB1A,SYT4,NNAT,ALDOC,MAP6,RNF213,NPY,IFI27L2A,OSR1,PRTN3,CCN3,EPHA5,NPR3,NEBL,CYBB,CNTN4,SYK,PTPRC,IRF4,SLC1A3,CDH8,MMP12,CD53,TREM2,SLC2A1,GRIN1,OAS2,COL25A1,CYP4A12B,SPN,MAPK12,GPR68,PAQR5,CARTPT,GREM1,C3AR1,TNFSF10,SPHK1,LY6D,CASP7,GPNMB,PDCD1,M…
GO:BP	multicellular organism development	GO:0007275	1.13e-12	11.9476	5391	699	272	21331	ATP1A2,SYT1,ACHE,PRRXL1,CBLN1,SEMA5B,ILDR2,SLC7A11,CGA,SPTBN4,PHACTR1,SCD1,ADCYAP1R1,CCL12,POU2AF1,PAPPA2,ASS1,SP100,B2M,ALCAM,TRPM1,CD8A,ABCB1A,SYT4,NNAT,MAP6,RNF213,NPY,OSR1,PRTN3,CCN3,EPHA5,NPR3,NEBL,CYBB,CNTN4,SYK,PTPRC,IRF4,SLC1A3,MMP12,TREM2,SLC2A1,GRIN1,OAS2,COL25A1,CYP4A12B,SPN,GPR68,PAQR5,CARTPT,GREM1,C3AR1,TNFSF10,SPHK1,LY6D,CASP7,GPNMB,PDCD1,CCR1,IL7R,LTB,MTHFD1L,CYTL1,GFAP,SLC8A1,HHIP…
GO:BP	positive regulation of cell communication	GO:0010647	1.19e-12	11.9262	1828	699	126	21331	SYT1,SCGN,CCL8,ADCYAP1R1,CCL12,IRF7,CD8A,NNAT,TRIM30A,CCN3,ZC3HAV1,NLRC5,SYK,PTPRC,SLC1A3,MMP12,TREM2,GRIN1,GPR68,CARTPT,GREM1,TNFSF10,SPHK1,GPNMB,CCR1,IL7R,ZBP1,GFAP,FGFBP1,GRIA4,CXCL12,TRIM30D,NOS1,BMP4,TMOD2,DHX58,RSAD2,ITPR3,TLR7,CASP4,CYFIP2,DGKD,CTSC,FCER1A,DCDC2A,LCK,CCBE1,THBS1,PTPN22,HAVCR2,SLC30A10,PTPN6,SRARP,MLKL,CHD5,CCL5,CACNA1B,MAP3K8,ITGAL,PIRB,ALPK1,CCL7,STXBP1,TRPM2,IFIH1,GPR183…
GO:BP	cellular response to interferon-beta	GO:0035458	2.02e-12	11.6955	51	699	19	21331	IFIT1,IFI211,IFI213,IFIT3,GM4951,IFI207,IFI204,IIGP1,MNDAL,STAT1,IFI203,IFI209,GBP3,TGTP2,IFI206,GM12185,IFI208,AIM2,IRGM1
GO:BP	regulation of ion transport	GO:0043269	2.46e-12	11.6098	736	699	70	21331	ATP1A2,SYT1,SLC6A1,SPTBN4,CTSS,ADCYAP1R1,CCL12,SLCO1A4,B2M,DPP6,ABCB1A,SYT4,OSR1,CYBB,SYK,TREM2,GRIN1,CCR1,SLC8A1,CXCL12,NOS1,BMP4,CORO1A,FGF12,KCNJ10,THBS1,PTPN22,SLC30A10,CYP4F18,CLIC5,PTPN6,TMEM37,CCL5,CACNA1B,CD84,SYT10,CXCL10,CACNA1A,STXBP1,HPCA,BCL2,AKAP6,RGS2,HTT,FCRL5,EDN1,NOS3,SHISA9,ASIC2,ANK3,HAP1,LYN,CXCR4,SYT5,ADRB2,PLA2G4A,SCN3B,ICAM1,LILRA5,IRS2,CACNB2,CHD7,ABCA7,PRNP,SARAF,CCL2,SY…
GO:BP	regulation of response to biotic stimulus	GO:0002831	2.57e-12	11.5903	296	699	42	21331	IRF7,IFI211,IFI213,ZC3HAV1,NLRC5,MMP12,TREM2,SPN,CCR1,ZBP1,TAP1,VSIG4,IFI207,DHX58,IFI204,VAV1,IRAK3,IL18RAP,PTPN22,HAVCR2,HMGB2,CCL5,MNDAL,STAT1,CD37,IFI203,IFI209,CD274,FGR,BMP6,CEACAM1,LRP8,IFI206,PARP14,APOBEC3,GBP5,PLSCR1,CLEC2D,IFI208,AIM2,IL12RB1,IRGM1
GO:BP	positive regulation of signaling	GO:0023056	3.73e-12	11.4284	1834	699	125	21331	SYT1,SCGN,CCL8,ADCYAP1R1,CCL12,IRF7,CD8A,NNAT,TRIM30A,CCN3,ZC3HAV1,NLRC5,SYK,PTPRC,SLC1A3,MMP12,TREM2,GRIN1,GPR68,CARTPT,GREM1,TNFSF10,SPHK1,GPNMB,CCR1,IL7R,ZBP1,GFAP,FGFBP1,GRIA4,CXCL12,TRIM30D,NOS1,BMP4,TMOD2,DHX58,RSAD2,ITPR3,TLR7,CASP4,CYFIP2,DGKD,CTSC,FCER1A,DCDC2A,LCK,CCBE1,THBS1,PTPN22,HAVCR2,SLC30A10,PTPN6,SRARP,MLKL,CHD5,CCL5,CACNA1B,MAP3K8,ITGAL,PIRB,ALPK1,CCL7,STXBP1,TRPM2,IFIH1,GPR183…
GO:BP	multicellular organismal process	GO:0032501	3.79e-12	11.4213	8454	699	379	21331	ATP1A2,SYT1,JCHAIN,ACHE,PRRXL1,PTGDS,CBLN1,SEMA5B,ILDR2,SLC7A11,SLC6A1,CGA,SPTBN4,CTSS,PHACTR1,SGIP1,SLC22A6,TAC4,GABRD,SCD1,ADCYAP1R1,CCL12,IRF7,RGR,POU2AF1,PAPPA2,IFI211,ASS1,SP100,B2M,DPP6,ALCAM,SLC6A2,RBP3,TRPM1,CD8A,ABCB1A,SYT4,NNAT,TRIM30A,MAP6,RNF213,NPY,OSR1,NAIP5,PRTN3,AQP4,CCN3,EPHA5,ZC3HAV1,NPR3,BST2,NEBL,CYBB,CNTN4,RTP4,SYK,RLBP1,PTPRC,IRF4,SLC1A3,MMP12,PDC,TREM2,SLC2A1,GRIN1,OAS2,COL…
GO:BP	cell-cell adhesion	GO:0098609	5.39e-12	11.2681	819	699	74	21331	CBLN1,SLC7A11,ASS1,ALCAM,AQP4,CCN3,SYK,PTPRC,CDH8,SPN,CD6,GPNMB,IL7R,SLFN1,CD5,VCAM1,COL13A1,CXCL12,VSIG4,BMP4,CORO1A,LAX1,CYFIP2,ITGB7,VMP1,PLEK,ITGB2,LCK,CXCL13,PTPN22,HAVCR2,CD2,NCKAP1L,ICOSL,PTPN6,MEGF10,CCL5,ITGAL,GLDN,FOXF1,STXBP1,ASTN1,CD274,RAC2,PRKCZ,JAML,BCL2,TTYH1,BMP6,CD3E,IL2RG,CEACAM1,ALOX12,DPP4,NRCAM,ANK3,LYN,ELANE,CLDN5,TNR,ADRB2,RASAL3,ITGA2B,ICAM1,CDH15,NFKBIZ,CTNNA1,SIRPB1C,PD…
GO:BP	positive regulation of defense response	GO:0031349	6.82e-12	11.1664	277	699	40	21331	CTSS,IRF7,IFI211,IFI213,ZC3HAV1,NLRC5,MMP12,TREM2,CD6,ZBP1,IFI207,DHX58,FCGR1,IFI204,CTSC,VAV1,FCER1A,IL18RAP,HAVCR2,HMGB2,CCL5,SERPINE1,MNDAL,IFI203,IL17RA,IFI209,GPR4,FCER1G,IFI206,C3,GBP5,ABCC1,PLSCR1,PLA2G4A,NFKBIZ,LILRA5,IFI208,PDE5A,AIM2,IRGM1
GO:BP	positive regulation of cellular process	GO:0048522	1.09e-11	10.9607	5809	699	284	21331	SYT1,SCGN,IGHA,IGLC1,ACHE,CBLN1,SEMA5B,PPP2R2B,IFIT2,CCL8,CTSS,SGIP1,SCD1,ADCYAP1R1,CCL12,IRF7,POU2AF1,ACER2,ASS1,B2M,DPP6,SLC6A13,CD8A,ABCB1A,SYT4,NNAT,TRIM30A,SP110,MAP6,CADPS,OSR1,CCN3,EPHA5,ZC3HAV1,NLRC5,CYBB,NKD2,SYK,PTPRC,IRF4,SLC1A3,MMP12,CD53,TREM2,GRIN1,IGLC2,SPN,GPR68,CARTPT,GREM1,CD6,C3AR1,TNFSF10,SPHK1,GPNMB,PDCD1,CCR1,IL7R,ZBP1,CYTL1,GFAP,SLC8A1,RAB27A,FGFBP1,CD5,VCAM1,SHTN1,GRIA4,CX…
GO:BP	cation transport	GO:0006812	1.38e-11	10.8596	1197	699	93	21331	ATP1A2,SYT1,SLC6A1,SPTBN4,CTSS,SLC22A8,ADCYAP1R1,CCL12,SLC13A3,OTOP3,B2M,DPP6,SLC6A2,TRPM1,ABCB1A,SYT4,OSR1,SLC6A20A,SYK,PTPRC,SLC1A3,TREM2,GRIN1,CCR1,SLC8A1,CXCL12,KCNT1,NOS1,BMP4,CORO1A,FGF12,ITPR3,KCNJ10,FCER1A,TRPM6,LCK,PTPN22,SLC30A10,PTPN6,SLC23A2,TMEM37,CCL5,CACNA1B,CD84,SYT10,SLC38A5,TMEM63C,CXCL10,CACNA1A,TRPM2,RAMP1,ATP2A3,HPCA,BCL2,AKAP6,SLC22A2,RGS2,FCER1G,HTT,FCRL5,EDN1,NOS3,SHISA9,C…
GO:BP	regulation of innate immune response	GO:0045088	1.52e-11	10.8187	182	699	32	21331	IRF7,IFI211,IFI213,NLRC5,MMP12,TREM2,CCR1,ZBP1,TAP1,VSIG4,IFI207,DHX58,IFI204,VAV1,IRAK3,IL18RAP,HAVCR2,HMGB2,MNDAL,IFI203,IFI209,FGR,CEACAM1,LRP8,IFI206,PARP14,GBP5,PLSCR1,CLEC2D,IFI208,AIM2,IRGM1
GO:BP	leukocyte differentiation	GO:0002521	1.89e-11	10.7231	559	699	58	21331	POU2AF1,B2M,CD8A,PRTN3,SYK,PTPRC,IRF4,TREM2,SPN,GPR68,CARTPT,LY6D,CCR1,IL7R,CD3G,BMP4,RSAD2,IKZF3,VAV1,CD79A,PGLYRP1,LCK,PTPN22,NCKAP1L,PTPN6,CCL5,PIRB,LY9,PDE1B,TRPM2,GPR183,PRKCZ,BCL2,LEPR,TNFSF8,OSTM1,CD3E,IL2RG,CEACAM1,FCER1G,GPR55,POU2F2,PRXL2A,LFNG,LYN,CLEC4D,SPI1,DOCK2,CD300LF,NFKBIZ,UBD,CLEC2D,INPP5D,IL18R1,CHD7,IKZF1,LMBR1L,PTK2B
GO:BP	export from cell	GO:0140352	2.4e-11	10.6192	1012	699	83	21331	ATP1A2,SYT1,PTGDS,CBLN1,ILDR2,CGA,TAC4,DOC2A,ABCB1A,SYT4,NNAT,CADPS,CCN3,EPHA5,SCG5,NKD2,SYK,TREM2,GPR68,CARTPT,SPHK1,CCR1,SLC8A1,RAB27A,CXCL12,NOS1,NRXN3,CORO1A,RSAD2,LAX1,FCER1A,PTPRN,PLEK,ITGB2,HAVCR2,STXBP2,FGF7,CCL5,CACNA1B,ANXA3,CD84,SYT10,LCP2,ABCC4,FOXF1,CACNA1A,STXBP1,TRPM2,IFIH1,RAC2,FGR,LEPR,BMP6,SLC22A2,CEACAM1,FCER1G,ABCG2,EDN1,POU2F2,PIWIL4,HAP1,BMP8A,LYN,ABCC1,SYT5,ADRB2,TFAP2B,PLA…
GO:BP	regulation of cell adhesion	GO:0030155	5.47e-11	10.2617	711	699	66	21331	ACER2,ASS1,EPHA5,SYK,PTPRC,MMP12,SPN,GREM1,CD6,GPNMB,IL7R,SPOCK1,SLFN1,CD5,VCAM1,CXCL12,VSIG4,BMP4,CORO1A,LAX1,VAV1,LCK,CXCL13,THBS1,LAMA1,PTPN22,HAVCR2,NCKAP1L,ICOSL,PTPN6,MEGF10,CCL5,SERPINE1,ITGAL,FOXF1,CD274,RAC2,GPR4,PRKCZ,BCL2,BMP6,CD3E,IL2RG,CEACAM1,ALOX12,CYTIP,DPP4,ANK3,LYN,ELANE,TNR,CXCR4,ADRB2,RASAL3,ICAM1,NFKBIZ,DOCK5,SIRPB1C,PDE5A,SEMA3E,PRNP,IL12RB1,CCL2,NDNF,LPXN,PTK2B
GO:BP	activation of immune response	GO:0002253	6.38e-11	10.1955	398	699	47	21331	IGHA,IGLC1,C4B,CD22,IFI211,IFI213,SYK,PTPRC,IGLC2,SPN,C3AR1,ZBP1,VSIG4,IFI207,LAX1,IFI204,CD79A,C1QA,LCK,PTPN22,NCKAP1L,ICOSL,PTPN6,C6,C1QB,MNDAL,TRBC2,IGHD,LCP2,IFI203,IFI209,BCL2,C1RA,CD3E,CEACAM1,FCER1G,FCRL5,IFI206,C3,LYN,PLSCR1,NFKBIZ,IGHG3,IFI208,AIM2,PRNP,LPXN
GO:BP	leukocyte migration	GO:0050900	6.45e-11	10.1902	368	699	45	21331	CCL8,CCL12,PRTN3,CCN3,SYK,TREM2,SPN,GREM1,C3AR1,CCR1,VCAM1,CXCL12,CORO1A,ITGB7,VAV1,ITGB2,PLA2G7,CXCL13,PTPN22,NCKAP1L,PGF,CCL5,SERPINE1,ITGAL,CCL7,CXCL10,CH25H,IL17RA,TRPM2,GPR183,RAC2,JAML,FCER1G,DPP4,EDN1,LYN,ELANE,CXCR2,CSF3R,ITGA2B,ICAM1,CXADR,CCL2,F7,PTK2B
GO:BP	chemotaxis	GO:0006935	6.54e-11	10.1843	609	699	60	21331	PRRXL1,SEMA5B,CCL8,CCL12,ALCAM,BIN2,CCN3,EPHA5,CNTN4,SYK,TREM2,GREM1,C3AR1,CCR1,VCAM1,CXCL12,BMP4,CORO1A,CRMP1,VAV1,SEMA3D,ITGB2,PLA2G7,CXCL13,THBS1,LAMA1,HMGB2,NCKAP1L,PGF,FGF7,CCL5,SERPINE1,TUBB2B,CCL7,CXCL10,CH25H,IL17RA,TRPM2,GPR183,RAC2,JAML,PROK2,ACKR2,FCER1G,DPP4,EDN1,NRCAM,DPYSL5,ANK3,LYN,ABCC1,DOCK2,CXCR4,CXCR2,CSF3R,CXADR,SEMA3E,CCL2,F7,PTK2B
GO:BP	transmembrane transport	GO:0055085	7.32e-11	10.1356	1541	699	108	21331	ATP1A2,SLC7A11,SLC6A1,CTSS,SLC22A8,SLC22A6,GABRD,SLC13A3,OTOP3,SLCO1A4,DPP6,SLC6A2,SLC6A13,TRPM1,ABCB1A,SV2B,OSR1,AQP4,SLC6A20A,CYBB,PTPRC,SLC1A3,TREM2,SLC2A1,GRIN1,SLC8A1,GRIA4,TAP1,GABRR3,KCNT1,NOS1,BMP4,CORO1A,FGF12,ITPR3,KCNJ10,TRPM6,LCK,THBS1,PTPN22,MLC1,SLC16A11,HK2,SLC30A10,CLIC5,PTPN6,SLC23A2,TMEM37,CLCA3A1,CACNA1B,SLC38A5,TMEM63C,CXCL10,ABCC4,SLC5A5,SLC28A2,CACNA1A,TRPM2,ATP2A3,HPCA,BCL2…
GO:BP	leukocyte chemotaxis	GO:0030595	7.66e-11	10.1156	230	699	35	21331	CCL8,CCL12,CCN3,SYK,GREM1,C3AR1,CCR1,CXCL12,CORO1A,VAV1,ITGB2,PLA2G7,CXCL13,NCKAP1L,PGF,CCL5,SERPINE1,CCL7,CXCL10,CH25H,IL17RA,TRPM2,GPR183,RAC2,JAML,FCER1G,DPP4,EDN1,LYN,CXCR2,CSF3R,CXADR,CCL2,F7,PTK2B
GO:BP	taxis	GO:0042330	8.14e-11	10.0895	612	699	60	21331	PRRXL1,SEMA5B,CCL8,CCL12,ALCAM,BIN2,CCN3,EPHA5,CNTN4,SYK,TREM2,GREM1,C3AR1,CCR1,VCAM1,CXCL12,BMP4,CORO1A,CRMP1,VAV1,SEMA3D,ITGB2,PLA2G7,CXCL13,THBS1,LAMA1,HMGB2,NCKAP1L,PGF,FGF7,CCL5,SERPINE1,TUBB2B,CCL7,CXCL10,CH25H,IL17RA,TRPM2,GPR183,RAC2,JAML,PROK2,ACKR2,FCER1G,DPP4,EDN1,NRCAM,DPYSL5,ANK3,LYN,ABCC1,DOCK2,CXCR4,CXCR2,CSF3R,CXADR,SEMA3E,CCL2,F7,PTK2B
GO:BP	leukocyte proliferation	GO:0070661	8.31e-11	10.0802	341	699	43	21331	CCL12,NPR3,SYK,PTPRC,TREM2,SPN,GREM1,CD6,GPNMB,IL7R,SLFN1,VCAM1,CXCL12,VSIG4,BMP4,CORO1A,IKZF3,CD79A,PTPN22,HAVCR2,NCKAP1L,ICOSL,PTPN6,CCL5,ITGAL,IGHD,CD274,GPR183,RAC2,BCL2,CD3E,CEACAM1,CTPS,LYN,DOCK2,RASAL3,CLU,INPP5D,IRS2,PDE5A,PRNP,IL12RB1,LMBR1L
GO:BP	cell chemotaxis	GO:0060326	1.13e-10	9.94669	315	699	41	21331	CCL8,CCL12,BIN2,CCN3,SYK,GREM1,C3AR1,CCR1,VCAM1,CXCL12,CORO1A,VAV1,ITGB2,PLA2G7,CXCL13,THBS1,HMGB2,NCKAP1L,PGF,CCL5,SERPINE1,CCL7,CXCL10,CH25H,IL17RA,TRPM2,GPR183,RAC2,JAML,ACKR2,FCER1G,DPP4,EDN1,LYN,ABCC1,CXCR2,CSF3R,CXADR,CCL2,F7,PTK2B
GO:BP	response to oxygen-containing compound	GO:1901700	1.3e-10	9.88483	1814	699	120	21331	ATP1A2,LY6C2,ILDR2,SLC6A1,SLC22A6,SCD1,ADCYAP1R1,CCL12,LY6A,SLCO1A4,ACER2,ASS1,B2M,NNAT,OSR1,AQP4,EPHA5,CYBB,SLC1A3,TREM2,SLC2A1,GRIN1,CTSG,GPR68,CD6,TNFSF10,SPHK1,GUCY1B1,SLC8A1,VCAM1,CXCL12,NOS1,SGMS1,BMP4,CPEB1,MGARP,ITPR3,CASP4,LDHA,IRAK3,APOBEC1,PTPRN,HP,IRF8,IL18RAP,LCK,CXCL13,THBS1,PTPN22,MLC1,LRAT,HAVCR2,SLC30A10,PLSCR2,HMGB2,GCLC,MPO,CCL5,SERPINE1,CACNA1B,FCGR4,CCL7,CBS,LRP11,CXCL10,SLC5…
GO:BP	animal organ development	GO:0048513	2.82e-10	9.54903	3586	699	194	21331	ATP1A2,SYT1,ACHE,PRRXL1,CBLN1,SEMA5B,ILDR2,SLC7A11,CGA,PHACTR1,SCD1,POU2AF1,PAPPA2,ASS1,B2M,TRPM1,CD8A,ABCB1A,SYT4,NNAT,NPY,OSR1,PRTN3,CCN3,EPHA5,NEBL,CNTN4,SYK,PTPRC,IRF4,TREM2,SLC2A1,GRIN1,OAS2,CYP4A12B,SPN,GPR68,CARTPT,GREM1,C3AR1,TNFSF10,SPHK1,LY6D,CASP7,GPNMB,CCR1,IL7R,LTB,MTHFD1L,CYTL1,SLC8A1,HHIP,VCAM1,COL13A1,CXCL12,WNT6,CD3G,ISG15,BMP4,BCAN,RSAD2,IFI204,IKZF3,VAV1,CD79A,PGLYRP1,LDHA,TAL2…
GO:BP	anion transport	GO:0006820	3.23e-10	9.4906	649	699	61	21331	SLC7A11,SLC6A1,SLC22A8,SLC22A6,GABRD,SLC13A3,SLCO1A4,SLC6A13,ABCB1A,SYT4,OSR1,SLC6A20A,SYK,SLC1A3,SLC2A1,GABRR3,KCNJ10,CAR4,THBS1,SLC16A11,PLSCR2,CYP4F18,CLIC5,ATP10A,SLC23A2,CLCA3A1,SLC38A5,ABCC4,SLC5A5,CACNA1A,STXBP1,PLSCR4,LRRC8D,TTYH1,ABCB1B,SLC22A2,SLCO2B1,RGS2,CEACAM1,ABCG2,EDN1,SLC7A2,ATP10D,SLC2A3,SLC13A4,SLC22A3,SLC20A1,ABCC1,SLC10A6,PLSCR1,PLA2G4A,SLC9A2,SLC16A12,LRRC8B,IRS2,SLC7A14,ABC…
GO:BP	negative regulation of viral genome replication	GO:0045071	3.26e-10	9.48617	57	699	18	21331	OASL2,ZC3HAV1,BST2,OAS1A,OAS2,IFITM3,ISG15,OASL1,RSAD2,OAS3,IFITM1,CCL5,OAS1G,IFITM6,APOBEC3,PLSCR1,MX2,PARP10
GO:BP	immune system development	GO:0002520	3.4e-10	9.46853	1003	699	80	21331	POU2AF1,B2M,CD8A,PRTN3,SYK,PTPRC,IRF4,TREM2,SPN,GPR68,CARTPT,C3AR1,LY6D,PDCD1,CCR1,IL7R,LTB,CD3G,ISG15,BMP4,RSAD2,IKZF3,VAV1,CD79A,PGLYRP1,IRAK3,PLEK,IRF8,LCK,CXCL13,PTPN22,HAVCR2,HMGB2,NCKAP1L,ICOSL,PTPN6,CCL5,PIRB,LY9,PDE1B,IGHD,STAT1,TRPM2,CD274,GPR183,PRKCZ,BCL2,LEPR,TNFSF8,OSTM1,CD3E,IL2RG,CEACAM1,FCER1G,FLT3,GPR55,POU2F2,PRXL2A,MFAP5,LFNG,APOBEC3,LYN,CLEC4D,SPI1,DOCK2,CD300LF,CSF3R,PLSCR1,N…
GO:BP	regulation of response to stress	GO:0080134	5.43e-10	9.26513	1356	699	97	21331	SLC7A11,CTSS,IRF7,IFI211,IFI213,B2M,ABCB1A,CCN3,ZC3HAV1,NLRC5,SYK,MMP12,TREM2,SPN,CD6,SPHK1,USP18,DERL3,CCR1,ZBP1,CXCL12,TAP1,VSIG4,MAPT,IFI207,IER3,DHX58,FCGR1,IFI204,CASP4,CTSC,VAV1,PGLYRP1,FCER1A,IRAK3,PLEK,TSPAN8,IL18RAP,THBS1,PTPN22,MLC1,HAVCR2,SLC30A10,HMGB2,MLKL,CCL5,SERPINE1,MNDAL,KNG2,STAT1,CD37,CBS,IFI203,FOXF1,IL17RA,IFI209,TRPM2,GPR4,FGR,CEACAM1,FCER1G,ALOX12,LRP8,EDN1,UIMC1,SLC7A2,IF…
GO:BP	regulation of immune effector process	GO:0002697	6.93e-10	9.1594	393	699	45	21331	B2M,ZC3HAV1,BST2,SYK,PTPRC,MMP12,SPN,IL7R,TAP1,VSIG4,DHX58,FCGR1,RSAD2,VAV1,PGLYRP1,FCER1A,IRAK3,ITGB2,IL18RAP,PTPN22,HAVCR2,STXBP2,PTPN6,C6,CCL5,CD84,STAT1,CD37,FOXF1,STXBP1,RAC2,PRKCZ,FGR,CEACAM1,FCER1G,DPP4,C3,APOBEC3,LYN,NFKBIZ,CLEC2D,IL18R1,AIM2,IL12RB1,CCL2
GO:BP	secretion by cell	GO:0032940	8.98e-10	9.04678	963	699	77	21331	SYT1,PTGDS,CBLN1,ILDR2,CGA,TAC4,DOC2A,SYT4,NNAT,CADPS,CCN3,EPHA5,SCG5,NKD2,SYK,TREM2,GPR68,CARTPT,SPHK1,CCR1,RAB27A,CXCL12,NOS1,NRXN3,CORO1A,RSAD2,LAX1,FCER1A,PTPRN,PLEK,ITGB2,HAVCR2,STXBP2,FGF7,CCL5,CACNA1B,ANXA3,CD84,SYT10,LCP2,ABCC4,FOXF1,CACNA1A,STXBP1,TRPM2,IFIH1,RAC2,FGR,LEPR,BMP6,CEACAM1,FCER1G,EDN1,POU2F2,PIWIL4,HAP1,BMP8A,LYN,SYT5,ADRB2,TFAP2B,PLA2G4A,CD14,LILRA5,ADCY1,SYN2,IRS2,CACNB2,S…
GO:BP	leukocyte cell-cell adhesion	GO:0007159	9.96e-10	9.00168	336	699	41	21331	ASS1,SYK,PTPRC,SPN,CD6,GPNMB,IL7R,SLFN1,CD5,VCAM1,CXCL12,VSIG4,BMP4,CORO1A,LAX1,ITGB7,ITGB2,LCK,PTPN22,HAVCR2,NCKAP1L,ICOSL,PTPN6,CCL5,ITGAL,CD274,RAC2,PRKCZ,CD3E,IL2RG,CEACAM1,DPP4,ELANE,RASAL3,ICAM1,NFKBIZ,SIRPB1C,PDE5A,PRNP,IL12RB1,CCL2
GO:BP	regulation of cell-cell adhesion	GO:0022407	1.21e-09	8.91611	415	699	46	21331	ASS1,SYK,PTPRC,SPN,CD6,GPNMB,IL7R,SLFN1,CD5,VCAM1,CXCL12,VSIG4,BMP4,CORO1A,LAX1,LCK,CXCL13,PTPN22,HAVCR2,NCKAP1L,ICOSL,PTPN6,MEGF10,CCL5,ITGAL,CD274,PRKCZ,BMP6,CD3E,IL2RG,CEACAM1,ALOX12,DPP4,ANK3,LYN,ELANE,TNR,ADRB2,RASAL3,ICAM1,NFKBIZ,SIRPB1C,PDE5A,PRNP,IL12RB1,CCL2
GO:BP	homeostatic process	GO:0042592	1.37e-09	8.86206	1944	699	123	21331	ATP1A2,SCGN,ACHE,ILDR2,SLC7A11,CTSS,SGIP1,TAC4,SCD1,ADCYAP1R1,SP100,B2M,TRPM1,ABCB1A,AQP4,CCN3,EPHA5,NPR3,SYK,PTPRC,IRF4,SLC2A1,GRIN1,GPR68,CARTPT,C3AR1,CCR1,IL7R,CYTL1,SLC8A1,VCAM1,TSPOAP1,IDE,NOS1,ISG15,CD52,BMP4,CORO1A,FGF12,ITPR3,KCNJ10,PTPRN,PLAC8,LCK,CXCL13,CAR4,TNFRSF11B,HK2,SLC30A10,HMGB2,NCKAP1L,ARRDC3,GCLC,PTPN6,FGF7,CCL5,CACNA1B,KNG2,FCGR4,PIRB,STAT1,CXCL10,SLC28A2,CACNA1A,TRPM2,ATP2A3…
GO:BP	leukocyte activation involved in immune response	GO:0002366	1.39e-09	8.85807	281	699	37	21331	PTGDS,TAC4,POU2AF1,SYK,PTPRC,IRF4,TREM2,SPN,RAB27A,CORO1A,PGLYRP1,FCER1A,ITGB2,HAVCR2,ICOSL,STXBP2,ANXA3,ITGAL,CD84,LY9,FOXF1,STXBP1,GPR183,RAC2,PRKCZ,FGR,CEACAM1,FCER1G,LFNG,LYN,CLEC4D,DOCK2,ICAM1,NFKBIZ,LCP1,IL18R1,PTK2B
GO:BP	negative regulation of immune system process	GO:0002683	1.4e-09	8.85374	465	699	49	21331	CD22,CCL12,CCN3,BST2,NLRC5,PTPRC,MMP12,SAMSN1,SPN,GPR68,CARTPT,GREM1,GPNMB,PDCD1,CCR1,IL7R,SLFN1,CXCL12,TAP1,VSIG4,BMP4,DHX58,LAX1,PGLYRP1,IRAK3,THBS1,PTPN22,HAVCR2,PTPN6,CD84,CD37,FOXF1,CD274,FGR,CEACAM1,FCER1G,FCRL5,DPP4,GPR55,PARP14,LYN,CD300LF,CXCR2,CLEC2D,INPP5D,PDE5A,PRNP,LPXN,PTK2B
GO:BP	secretion	GO:0046903	1.67e-09	8.77837	1134	699	85	21331	SYT1,PTGDS,CBLN1,ILDR2,SLC6A1,CGA,SLC22A6,TAC4,SLCO1A4,DOC2A,SYT4,NNAT,CADPS,AQP4,CCN3,EPHA5,NPR3,SCG5,NKD2,SYK,TREM2,OAS2,GPR68,CARTPT,SPHK1,CCR1,RAB27A,CXCL12,NOS1,NRXN3,CORO1A,RSAD2,LAX1,FCER1A,PTPRN,PLEK,ITGB2,HK2,HAVCR2,CYP4F18,STXBP2,FGF7,CCL5,CACNA1B,ANXA3,CD84,SYT10,LCP2,ABCC4,FOXF1,CACNA1A,STXBP1,TRPM2,IFIH1,RAC2,FGR,LEPR,BMP6,CEACAM1,FCER1G,EDN1,POU2F2,PIWIL4,HAP1,BMP8A,LYN,SYT5,ADRB2,T…
GO:BP	ion transmembrane transport	GO:0034220	1.67e-09	8.77837	1134	699	85	21331	ATP1A2,SLC7A11,SLC6A1,CTSS,SLC22A6,GABRD,SLC13A3,OTOP3,DPP6,SLC6A13,TRPM1,ABCB1A,OSR1,SLC6A20A,CYBB,PTPRC,SLC1A3,TREM2,SLC2A1,GRIN1,SLC8A1,GRIA4,GABRR3,KCNT1,NOS1,BMP4,CORO1A,FGF12,ITPR3,KCNJ10,TRPM6,LCK,THBS1,PTPN22,MLC1,SLC16A11,SLC30A10,CLIC5,PTPN6,SLC23A2,TMEM37,CLCA3A1,CACNA1B,SLC38A5,TMEM63C,CXCL10,SLC5A5,CACNA1A,TRPM2,ATP2A3,HPCA,LRRC8D,TTYH1,AKAP6,SLC22A2,RGS2,HTT,FCRL5,CHRNB4,SHISA9,COX8…
GO:BP	cell activation involved in immune response	GO:0002263	1.92e-09	8.71575	284	699	37	21331	PTGDS,TAC4,POU2AF1,SYK,PTPRC,IRF4,TREM2,SPN,RAB27A,CORO1A,PGLYRP1,FCER1A,ITGB2,HAVCR2,ICOSL,STXBP2,ANXA3,ITGAL,CD84,LY9,FOXF1,STXBP1,GPR183,RAC2,PRKCZ,FGR,CEACAM1,FCER1G,LFNG,LYN,CLEC4D,DOCK2,ICAM1,NFKBIZ,LCP1,IL18R1,PTK2B
GO:BP	regulation of cytosolic calcium ion concentration	GO:0051480	2.14e-09	8.66939	390	699	44	21331	ATP1A2,SCGN,TAC4,ADCYAP1R1,TRPM1,PTPRC,GRIN1,C3AR1,CCR1,SLC8A1,TSPOAP1,NOS1,CD52,BMP4,CORO1A,ITPR3,LCK,CXCL13,PTPN6,CACNA1B,KNG2,CXCL10,CACNA1A,TRPM2,GPR4,LPAR6,BCL2,AKAP6,GM5127,ACKR2,HTT,FCRL5,EDN1,GPR55,HAP1,LYN,CXCR2,ADRB2,CACNB2,CHD7,PRNP,NMB,ADCY5,PTK2B
GO:BP	intracellular signal transduction	GO:0035556	2.51e-09	8.59975	2493	699	146	21331	CCL8,ADCYAP1R1,CCL12,ACER2,PPP1R1A,CD8A,TRIM30A,CCN3,EPHA5,ZC3HAV1,NPR3,GARNL3,NLRC5,SYK,PTPRC,TREM2,GRIN1,MAPK12,CARTPT,GREM1,TNFSF10,SPHK1,GUCY1B1,GPNMB,CCR1,SLC8A1,VCAM1,SHTN1,CXCL12,TRIM30D,MAPT,NOS1,BMP4,EPS8L1,DHX58,FGF12,ITPR3,LAX1,IFI204,TLR7,PLCB2,CASP4,DGKD,ARHGAP45,VAV1,DCLK3,FCER1A,IRAK3,DCDC2A,PLEK,ADGRG5,LCK,THBS1,PTPN22,NYAP2,HAVCR2,SLC30A10,SEZ6L,DOCK3,ARRDC3,PTPN6,MLKL,CHD5,CCL5,…
GO:BP	regulation of leukocyte proliferation	GO:0070663	2.69e-09	8.56968	245	699	34	21331	CCL12,SYK,PTPRC,SPN,GREM1,CD6,GPNMB,SLFN1,VCAM1,VSIG4,BMP4,CORO1A,IKZF3,PTPN22,HAVCR2,NCKAP1L,ICOSL,PTPN6,CCL5,ITGAL,IGHD,CD274,GPR183,RAC2,BCL2,CD3E,CEACAM1,LYN,RASAL3,INPP5D,IRS2,PDE5A,PRNP,IL12RB1
GO:BP	cell migration	GO:0016477	2.77e-09	8.55746	1479	699	101	21331	PRRXL1,SEMA5B,CCL8,PHACTR1,CCL12,SP100,BIN2,PRTN3,CCN3,BST2,SYK,PTPRC,MMP12,TREM2,GRIN1,SPN,GREM1,C3AR1,SPHK1,GPNMB,CCR1,SLC8A1,FGFBP1,VCAM1,SHTN1,CXCL12,MAPT,BMP4,CORO1A,CPEB1,CRMP1,ITGB7,VAV1,DCDC2A,SEMA3D,ITGB2,IFITM1,PLA2G7,CXCL13,CCBE1,THBS1,LAMA1,PTPN22,HMGB2,NCKAP1L,MEGF10,PGF,FGF7,CCL5,SERPINE1,TUBB2B,ANXA3,ITGAL,CCL7,CXCL10,CH25H,FOXF1,IL17RA,TRPM2,ASTN1,CD274,GPR183,RAC2,PRKCZ,FGR,JAML,…
GO:BP	regulation of leukocyte cell-cell adhesion	GO:1903037	2.81e-09	8.55188	302	699	38	21331	ASS1,SYK,PTPRC,SPN,CD6,GPNMB,IL7R,SLFN1,CD5,VCAM1,CXCL12,VSIG4,BMP4,CORO1A,LAX1,LCK,PTPN22,HAVCR2,NCKAP1L,ICOSL,PTPN6,CCL5,ITGAL,CD274,PRKCZ,CD3E,IL2RG,CEACAM1,DPP4,ELANE,RASAL3,ICAM1,NFKBIZ,SIRPB1C,PDE5A,PRNP,IL12RB1,CCL2
GO:BP	regulation of vesicle-mediated transport	GO:0060627	3.82e-09	8.41754	580	699	55	21331	SYT1,SGIP1,CD22,DOC2A,B2M,SYT4,CADPS,PRTN3,SYK,PTPRC,TREM2,GREM1,SPHK1,RAB27A,NRXN3,CORO1A,FCGR1,DGKD,FCER1A,SH3GL3,ITGB2,NCKAP1L,STXBP2,SERPINE1,CACNA1B,CD84,SYT10,FOXF1,CACNA1A,STXBP1,RAC2,HPCA,FGR,IL2RG,CEACAM1,FCER1G,C3,HAP1,LYN,DOCK2,CD300LF,SYT5,ADRB2,PLA2G4A,CD14,CLU,ADCY1,SIRPB1C,CACNB2,SYTL4,ABCA7,SLC2A4,CCL2,SYT7,HCK
GO:BP	regulation of lymphocyte proliferation	GO:0050670	4.41e-09	8.35574	222	699	32	21331	SYK,PTPRC,SPN,CD6,GPNMB,SLFN1,VCAM1,VSIG4,BMP4,CORO1A,IKZF3,PTPN22,HAVCR2,NCKAP1L,ICOSL,PTPN6,CCL5,ITGAL,IGHD,CD274,GPR183,RAC2,BCL2,CD3E,CEACAM1,LYN,RASAL3,INPP5D,IRS2,PDE5A,PRNP,IL12RB1
GO:BP	negative regulation of biological process	GO:0048519	5.13e-09	8.29002	5541	699	264	21331	ATP1A2,C4B,PTGDS,CBLN1,SEMA5B,SLC7A11,SLC6A1,CGA,SPTBN4,PHACTR1,CD22,ADCYAP1R1,CCL12,OASL2,IFI211,IFI213,ACER2,ASS1,PPP1R1A,SP100,B2M,ABCB1A,SYT4,TRIM30A,RNF213,OSR1,NAIP5,PRTN3,AQP4,CCN3,EPHA5,ZC3HAV1,NPR3,BST2,IFIT3,NLRC5,NKD2,CNTN4,SLFN2,OAS1A,PTPRC,IRF4,MMP12,TREM2,GRIN1,SAMSN1,OAS2,SPN,MAPK12,GPR68,CARTPT,GREM1,SPHK1,DERL3,IFITM3,GPNMB,CIART,PDCD1,CCR1,IL7R,SKAP2,GFAP,SLC8A1,HHIP,SPOCK1,SLFN…
GO:BP	positive regulation of cytosolic calcium ion concentration	GO:0007204	6.28e-09	8.20226	340	699	40	21331	TAC4,ADCYAP1R1,TRPM1,PTPRC,GRIN1,C3AR1,CCR1,SLC8A1,CD52,BMP4,CORO1A,ITPR3,LCK,CXCL13,PTPN6,CACNA1B,KNG2,CXCL10,CACNA1A,TRPM2,GPR4,LPAR6,BCL2,AKAP6,GM5127,ACKR2,HTT,FCRL5,EDN1,GPR55,HAP1,LYN,CXCR2,ADRB2,CACNB2,CHD7,PRNP,NMB,ADCY5,PTK2B
GO:BP	lymphocyte proliferation	GO:0046651	6.32e-09	8.19924	310	699	38	21331	SYK,PTPRC,SPN,CD6,GPNMB,IL7R,SLFN1,VCAM1,CXCL12,VSIG4,BMP4,CORO1A,IKZF3,CD79A,PTPN22,HAVCR2,NCKAP1L,ICOSL,PTPN6,CCL5,ITGAL,IGHD,CD274,GPR183,RAC2,BCL2,CD3E,CEACAM1,CTPS,LYN,DOCK2,RASAL3,INPP5D,IRS2,PDE5A,PRNP,IL12RB1,LMBR1L
GO:BP	regulation of mononuclear cell proliferation	GO:0032944	6.38e-09	8.19516	225	699	32	21331	SYK,PTPRC,SPN,CD6,GPNMB,SLFN1,VCAM1,VSIG4,BMP4,CORO1A,IKZF3,PTPN22,HAVCR2,NCKAP1L,ICOSL,PTPN6,CCL5,ITGAL,IGHD,CD274,GPR183,RAC2,BCL2,CD3E,CEACAM1,LYN,RASAL3,INPP5D,IRS2,PDE5A,PRNP,IL12RB1
GO:BP	myeloid leukocyte migration	GO:0097529	7.21e-09	8.14227	226	699	32	21331	CCL8,CCL12,PRTN3,CCN3,SYK,TREM2,GREM1,C3AR1,CCR1,CXCL12,VAV1,ITGB2,PLA2G7,CXCL13,NCKAP1L,PGF,CCL5,SERPINE1,CCL7,CXCL10,IL17RA,RAC2,JAML,FCER1G,DPP4,EDN1,LYN,CXCR2,CSF3R,CXADR,CCL2,PTK2B
GO:BP	adaptive immune response based on somatic recombination of immune receptors built from immunoglobulin superfamily domains	GO:0002460	8.47e-09	8.07215	390	699	43	21331	IGHA,IGLC1,C4B,IRF7,B2M,CD8A,PTPRC,IRF4,IGLC2,SPN,C3AR1,IL7R,RAB27A,FCGR1,RSAD2,CTSC,FCER1A,C1QA,IL18RAP,HAVCR2,ICOSL,PTPN6,C6,C1QB,TRBC2,PIRB,LY9,IGHD,CD274,PRKCZ,C1RA,CEACAM1,FCER1G,DPP4,POU2F2,C3,PLA2G4A,ICAM1,NFKBIZ,IGHG3,INPP5D,IL18R1,IL12RB1
GO:BP	mononuclear cell proliferation	GO:0032943	8.51e-09	8.07026	313	699	38	21331	SYK,PTPRC,SPN,CD6,GPNMB,IL7R,SLFN1,VCAM1,CXCL12,VSIG4,BMP4,CORO1A,IKZF3,CD79A,PTPN22,HAVCR2,NCKAP1L,ICOSL,PTPN6,CCL5,ITGAL,IGHD,CD274,GPR183,RAC2,BCL2,CD3E,CEACAM1,CTPS,LYN,DOCK2,RASAL3,INPP5D,IRS2,PDE5A,PRNP,IL12RB1,LMBR1L
GO:BP	positive regulation of cell activation	GO:0050867	8.85e-09	8.05315	472	699	48	21331	IGHA,IGLC1,SYK,PTPRC,TREM2,IGLC2,SPN,CD6,IL7R,CD5,VCAM1,CORO1A,CTSC,FCER1A,PLEK,ITGB2,LCK,THBS1,PTPN22,HAVCR2,NCKAP1L,ICOSL,STXBP2,CCL5,ITGAL,TRBC2,IGHD,STXBP1,CD274,GPR183,PRKCZ,FGR,BCL2,CD3E,IL2RG,FCER1G,DPP4,CLEC4D,RASAL3,PLA2G4A,NFKBIZ,LILRA5,IGHG3,SIRPB1C,INPP5D,IRS2,IL12RB1,CCL2
GO:BP	second-messenger-mediated signaling	GO:0019932	8.91e-09	8.0503	439	699	46	21331	ADCYAP1R1,CD8A,EPHA5,SYK,PTPRC,TREM2,GRIN1,SPHK1,GUCY1B1,CCR1,SLC8A1,VCAM1,MAPT,NOS1,ITPR3,FCER1A,ADGRG5,THBS1,ARRDC3,PDE10A,ITGAL,TREML1,CBS,CXCL10,TRPM2,RAMP1,HPCA,GPR4,AKAP6,ACKR2,CD3E,RGS2,HTT,EDN1,NOS3,HAP1,CXCR4,RASD2,CXCR2,ADRB2,ADCY1,PDE5A,PRNP,ADCY5,NDNF,PTK2B
GO:BP	cell differentiation	GO:0030154	9.5e-09	8.02227	4367	699	219	21331	SYT1,ACHE,PRRXL1,CBLN1,SEMA5B,ILDR2,SLC7A11,CCL8,SPTBN4,PHACTR1,SCD1,ADCYAP1R1,CCL12,POU2AF1,B2M,ALCAM,TRPM1,CD8A,ABCB1A,SYT4,ALDOC,MAP6,NPY,OSR1,PRTN3,CCN3,EPHA5,NEBL,CNTN4,SYK,PTPRC,IRF4,SLC1A3,CD53,TREM2,GRIN1,COL25A1,SPN,MAPK12,GPR68,PAQR5,CARTPT,GREM1,SPHK1,LY6D,CASP7,GPNMB,MYOF,CCR1,IL7R,CYTL1,GFAP,HHIP,RAB27A,SPOCK1,VCAM1,COL13A1,SHTN1,CXCL12,WNT6,MAPT,CD3G,NR6A1,NOS1,ISG15,PSMB8,BMP4,BCAN…
GO:BP	endocytosis	GO:0006897	1.21e-08	7.91568	651	699	58	21331	SYT1,IGHA,IGLC1,ACHE,SGIP1,CD22,B2M,BIN2,SYT4,SYK,TREM2,IGLC2,GREM1,CD6,SPHK1,IFITM3,CD5,FCGR1,DGKD,SH3GL3,THBS1,MLC1,NCKAP1L,MEGF10,SERPINE1,TRBC2,IGHD,LY75,LRP11,HHIPL1,APOBR,RAMP1,RAC2,HPCA,DENND1C,LSR,ACKR2,CEACAM1,FCER1G,LRP8,LGALS3BP,C3,HAP1,DOCK2,CXCR2,SYT5,ADRB2,MX2,CD163L1,CD14,CLU,IGHG3,RIN1,ABCA7,RHOU,LMBR1L,SLC2A4,ENPP1
GO:BP	chemical synaptic transmission	GO:0007268	1.63e-08	7.78771	674	699	59	21331	SYT1,SCGN,CBLN1,SLC7A11,SLC6A1,GABRD,DOC2A,SLC6A2,SYT4,SV2B,CADPS,SLC1A3,CDH8,GRIN1,CARTPT,SPHK1,GUCY1B1,GFAP,PHF24,GRIA4,GABRR3,MAPT,NOS1,NRXN3,CPEB1,TMOD2,FGF12,ITPR3,KCNJ10,DCDC2A,STXBP2,CACNA1B,TUBB2B,PIRB,SYT10,BEGAIN,CACNA1A,STXBP1,PRKCZ,LRP8,EDN1,CHRNB4,SHISA9,HAP1,TNR,RASD2,SYT5,ADRB2,BCHE,ADCY1,SYN2,RIN1,CACNB2,PRNP,GRIK3,CCL2,SYT7,PTK2B,SNCG
GO:BP	anterograde trans-synaptic signaling	GO:0098916	1.63e-08	7.78771	674	699	59	21331	SYT1,SCGN,CBLN1,SLC7A11,SLC6A1,GABRD,DOC2A,SLC6A2,SYT4,SV2B,CADPS,SLC1A3,CDH8,GRIN1,CARTPT,SPHK1,GUCY1B1,GFAP,PHF24,GRIA4,GABRR3,MAPT,NOS1,NRXN3,CPEB1,TMOD2,FGF12,ITPR3,KCNJ10,DCDC2A,STXBP2,CACNA1B,TUBB2B,PIRB,SYT10,BEGAIN,CACNA1A,STXBP1,PRKCZ,LRP8,EDN1,CHRNB4,SHISA9,HAP1,TNR,RASD2,SYT5,ADRB2,BCHE,ADCY1,SYN2,RIN1,CACNB2,PRNP,GRIK3,CCL2,SYT7,PTK2B,SNCG
GO:BP	synaptic signaling	GO:0099536	1.74e-08	7.75883	712	699	61	21331	SYT1,SCGN,LY6C2,CBLN1,SLC7A11,SLC6A1,GABRD,LY6A,DOC2A,SLC6A2,SYT4,SV2B,CADPS,SLC1A3,CDH8,GRIN1,CARTPT,SPHK1,GUCY1B1,GFAP,PHF24,GRIA4,GABRR3,MAPT,NOS1,NRXN3,CPEB1,TMOD2,FGF12,ITPR3,KCNJ10,DCDC2A,STXBP2,CACNA1B,TUBB2B,PIRB,SYT10,BEGAIN,CACNA1A,STXBP1,PRKCZ,LRP8,EDN1,CHRNB4,SHISA9,HAP1,TNR,RASD2,SYT5,ADRB2,BCHE,ADCY1,SYN2,RIN1,CACNB2,PRNP,GRIK3,CCL2,SYT7,PTK2B,SNCG
GO:BP	hematopoietic or lymphoid organ development	GO:0048534	1.81e-08	7.74137	943	699	73	21331	POU2AF1,B2M,CD8A,PRTN3,SYK,PTPRC,IRF4,TREM2,SPN,GPR68,CARTPT,LY6D,CCR1,IL7R,LTB,CD3G,ISG15,BMP4,RSAD2,IKZF3,VAV1,CD79A,PGLYRP1,PLEK,IRF8,LCK,CXCL13,PTPN22,HMGB2,NCKAP1L,PTPN6,CCL5,PIRB,LY9,PDE1B,STAT1,TRPM2,GPR183,PRKCZ,BCL2,LEPR,TNFSF8,OSTM1,CD3E,IL2RG,CEACAM1,FCER1G,FLT3,GPR55,POU2F2,PRXL2A,MFAP5,LFNG,APOBEC3,LYN,CLEC4D,SPI1,DOCK2,CD300LF,CSF3R,PLSCR1,NFKBIZ,UBD,TBX1,CLEC2D,INPP5D,IL18R1,CHD7,R…
GO:BP	cellular developmental process	GO:0048869	1.82e-08	7.73911	4448	699	221	21331	SYT1,ACHE,PRRXL1,CBLN1,SEMA5B,ILDR2,SLC7A11,CCL8,SPTBN4,PHACTR1,SCD1,ADCYAP1R1,CCL12,POU2AF1,B2M,ALCAM,TRPM1,CD8A,ABCB1A,SYT4,ALDOC,MAP6,NPY,OSR1,PRTN3,CCN3,EPHA5,NEBL,CNTN4,SYK,PTPRC,IRF4,SLC1A3,CD53,TREM2,GRIN1,COL25A1,SPN,MAPK12,GPR68,PAQR5,CARTPT,GREM1,SPHK1,LY6D,CASP7,GPNMB,MYOF,CCR1,IL7R,CYTL1,GFAP,HHIP,RAB27A,SPOCK1,VCAM1,COL13A1,SHTN1,CXCL12,WNT6,MAPT,CD3G,NR6A1,NOS1,ISG15,PSMB8,BMP4,BCAN…
GO:BP	response to interferon-gamma	GO:0034341	1.88e-08	7.72585	156	699	26	21331	CCL8,CCL12,ASS1,AQP4,BST2,NLRC5,IFITM3,GBP8,IFITM1,IRF8,STXBP2,CCL5,CCL7,STAT1,IFITM6,STXBP1,GBP3,TGTP2,EDN1,PARP14,GBP5,GBP9,UBD,IL12RB1,CCL2,IRGM1
GO:BP	trans-synaptic signaling	GO:0099537	2.8e-08	7.55232	683	699	59	21331	SYT1,SCGN,CBLN1,SLC7A11,SLC6A1,GABRD,DOC2A,SLC6A2,SYT4,SV2B,CADPS,SLC1A3,CDH8,GRIN1,CARTPT,SPHK1,GUCY1B1,GFAP,PHF24,GRIA4,GABRR3,MAPT,NOS1,NRXN3,CPEB1,TMOD2,FGF12,ITPR3,KCNJ10,DCDC2A,STXBP2,CACNA1B,TUBB2B,PIRB,SYT10,BEGAIN,CACNA1A,STXBP1,PRKCZ,LRP8,EDN1,CHRNB4,SHISA9,HAP1,TNR,RASD2,SYT5,ADRB2,BCHE,ADCY1,SYN2,RIN1,CACNB2,PRNP,GRIK3,CCL2,SYT7,PTK2B,SNCG
GO:BP	vesicle-mediated transport	GO:0016192	2.81e-08	7.55113	1560	699	102	21331	SYT1,IGHA,IGLC1,ACHE,PTGDS,SGIP1,TAC4,CD22,DOC2A,B2M,BIN2,SYT4,CADPS,PRTN3,NKD2,SYK,PTPRC,TREM2,IGLC2,GREM1,CD6,SPHK1,IFITM3,CCR1,RAB27A,CD5,NRXN3,CORO1A,FCGR1,DGKD,VAV1,FCER1A,SH3GL3,PLEK,ITGB2,IRF8,THBS1,MLC1,NCKAP1L,STXBP2,MEGF10,CCL5,SERPINE1,CACNA1B,ANXA3,ITGAL,TRBC2,CD84,SYT10,IGHD,LY75,LRP11,HHIPL1,APOBR,FOXF1,CACNA1A,STXBP1,RAMP1,RAC2,HPCA,DENND1C,LSR,FGR,LEPR,ACKR2,IL2RG,CEACAM1,FCER1G,H…
GO:BP	signal transduction	GO:0007165	3.02e-08	7.5199	6712	699	303	21331	GPR158,LY6C2,IGHA,IGLC1,CBLN1,SEMA5B,CCL8,CGA,TAC4,GABRD,CD22,ADCYAP1R1,CCL12,IRF7,RGR,LY6A,SLCO1A4,ACER2,PPP1R1A,SP100,TRPM1,CD8A,TRIM30A,RNF213,NPY,IFI27L2A,CCN3,EPHA5,ZC3HAV1,NPR3,SCG5,GARNL3,NLRC5,CYBB,NKD2,SYK,PTPRC,IRF4,MMP12,TREM2,GRIN1,IGLC2,OAS2,SPN,MAPK12,GPR68,CARTPT,GREM1,CD6,C3AR1,TNFSF10,SPHK1,GUCY1B1,DERL3,IFITM3,GPNMB,ARHGAP11A,MYOF,CCR1,IL7R,LTB,ZBP1,SLC8A1,HHIP,FGFBP1,CD5,HPCAL4…
GO:BP	positive regulation of leukocyte activation	GO:0002696	3.09e-08	7.51067	455	699	46	21331	IGHA,IGLC1,SYK,PTPRC,TREM2,IGLC2,SPN,CD6,IL7R,CD5,VCAM1,CORO1A,CTSC,FCER1A,ITGB2,LCK,THBS1,PTPN22,HAVCR2,NCKAP1L,ICOSL,STXBP2,CCL5,ITGAL,TRBC2,IGHD,STXBP1,CD274,GPR183,PRKCZ,FGR,BCL2,CD3E,IL2RG,FCER1G,DPP4,CLEC4D,RASAL3,PLA2G4A,NFKBIZ,IGHG3,SIRPB1C,INPP5D,IRS2,IL12RB1,CCL2
GO:BP	cell population proliferation	GO:0008283	3.24e-08	7.49002	2083	699	125	21331	PTGDS,SLC7A11,CCL12,ACER2,B2M,ABCB1A,OSR1,CCN3,NPR3,IFIT3,SLFN2,SYK,PTPRC,MMP12,TREM2,SPN,GREM1,CD6,C3AR1,SPHK1,IFITM3,GPNMB,IL7R,SKAP2,GFAP,HHIP,SLFN1,FGFBP1,VCAM1,CXCL12,VSIG4,PDE1A,VIPR2,NOS1,BMP4,CORO1A,CPEB1,IKZF3,CD79A,APOBEC1,PTPRN,IFITM1,IL18RAP,PLAC8,ADAM33,LCK,THBS1,PTPN22,HAVCR2,HMGB2,FBXO2,NCKAP1L,ICOSL,PTPN6,MEGF10,PGF,FGF7,CHD5,CCL5,ITGAL,IGHD,SLA,STAT1,FABP7,CD37,CXCL10,CDKN2C,ABCC…
GO:BP	hemopoiesis	GO:0030097	3.34e-08	7.47635	896	699	70	21331	POU2AF1,B2M,CD8A,PRTN3,SYK,PTPRC,IRF4,TREM2,SPN,GPR68,CARTPT,LY6D,CCR1,IL7R,CD3G,ISG15,BMP4,RSAD2,IKZF3,VAV1,CD79A,PGLYRP1,PLEK,IRF8,LCK,PTPN22,HMGB2,NCKAP1L,PTPN6,CCL5,PIRB,LY9,PDE1B,STAT1,TRPM2,GPR183,PRKCZ,BCL2,LEPR,TNFSF8,OSTM1,CD3E,IL2RG,CEACAM1,FCER1G,FLT3,GPR55,POU2F2,PRXL2A,MFAP5,LFNG,APOBEC3,LYN,CLEC4D,SPI1,DOCK2,CD300LF,CSF3R,PLSCR1,NFKBIZ,UBD,CLEC2D,INPP5D,IL18R1,CHD7,ROGDI,IKZF1,LMBR1…
GO:BP	positive regulation of cell migration	GO:0030335	3.99e-08	7.39949	562	699	52	21331	SEMA5B,CCL12,PTPRC,TREM2,GRIN1,SPN,C3AR1,SPHK1,GPNMB,CCR1,SLC8A1,FGFBP1,SHTN1,CXCL12,BMP4,CORO1A,CPEB1,SEMA3D,PLA2G7,CXCL13,CCBE1,THBS1,NCKAP1L,PGF,FGF7,CCL5,SERPINE1,ANXA3,CCL7,CXCL10,FOXF1,CD274,RAC2,FGR,BCL2,ALOX12,EDN1,NOS3,LYN,ABCC1,ELANE,CXCR4,CXCR2,ITGA2B,ICAM1,DOCK5,IRS2,SEMA3E,CCL2,F7,ITGAX,PTK2B
GO:BP	regulated exocytosis	GO:0045055	4.12e-08	7.38523	241	699	32	21331	SYT1,PTGDS,TAC4,DOC2A,SYT4,CADPS,SYK,RAB27A,NRXN3,CORO1A,FCER1A,PLEK,ITGB2,STXBP2,CACNA1B,ANXA3,CD84,SYT10,FOXF1,CACNA1A,STXBP1,RAC2,FGR,CEACAM1,FCER1G,LYN,SYT5,ADRB2,ADCY1,SYN2,CACNB2,SYT7
GO:BP	biological regulation	GO:0065007	4.42e-08	7.35486	13383	699	520	21331	ATP1A2,SYT1,SCGN,JCHAIN,GPR158,LY6C2,IGHA,IGLC1,ACHE,C4B,PRRXL1,PTGDS,CBLN1,SEMA5B,ILDR2,PPP2R2B,SLC7A11,IFIT2,CCL8,SLC6A1,CGA,SPTBN4,CTSS,PHACTR1,SGIP1,TAC4,GABRD,CD22,SCD1,ADCYAP1R1,CCL12,IRF7,RGR,POU2AF1,LY6A,OASL2,IFI211,IFI213,SLCO1A4,ACER2,ASS1,PPP1R1A,SP100,DOC2A,B2M,DPP6,SLC6A2,SLC6A13,TRPM1,CD8A,ABCB1A,SYT4,NNAT,TRIM30A,SP110,MAP6,CADPS,RNF213,NPY,IFI27L2A,OSR1,NAIP5,PRTN3,AQP4,CCN3,EPHA…
GO:BP	positive regulation of transport	GO:0051050	4.48e-08	7.34827	1042	699	77	21331	SYT1,SLC6A1,CTSS,SGIP1,TAC4,ADCYAP1R1,CCL12,B2M,DPP6,ABCB1A,SYT4,NNAT,CADPS,SYK,PTPRC,TREM2,GRIN1,GPR68,CARTPT,GREM1,SPHK1,CCR1,RAB27A,CXCL12,NOS1,BMP4,FGF12,FCGR1,DGKD,FCER1A,ITGB2,PTPN22,MLC1,LRAT,HAVCR2,CYP4F18,NCKAP1L,STXBP2,CCL5,SERPINE1,CACNA1B,SYT10,CXCL10,STXBP1,TRPM2,IFIH1,HPCA,PRKCZ,FGR,LEPR,AKAP6,BMP6,IL2RG,FCER1G,HTT,EDN1,ASIC2,ANK3,C3,HAP1,DOCK2,CD300LF,ADRB2,PLA2G4A,SCN3B,CD14,LILRA…
GO:BP	regulation of calcium ion transport	GO:0051924	5.25e-08	7.28011	272	699	34	21331	ATP1A2,ADCYAP1R1,CCL12,GRIN1,CCR1,SLC8A1,CXCL12,NOS1,BMP4,CORO1A,PTPN22,PTPN6,CCL5,CACNA1B,CD84,CXCL10,CACNA1A,HPCA,BCL2,AKAP6,HTT,FCRL5,NOS3,HAP1,LYN,CXCR4,ADRB2,ICAM1,LILRA5,CACNB2,CHD7,PRNP,SARAF,PTK2B
GO:BP	regulation of leukocyte mediated immunity	GO:0002703	5.66e-08	7.2474	216	699	30	21331	B2M,BST2,SYK,PTPRC,SPN,IL7R,TAP1,FCGR1,RSAD2,VAV1,FCER1A,ITGB2,IL18RAP,HAVCR2,STXBP2,PTPN6,CD84,FOXF1,STXBP1,RAC2,PRKCZ,FGR,CEACAM1,FCER1G,DPP4,C3,LYN,CLEC2D,IL18R1,CCL2
GO:BP	positive regulation of signal transduction	GO:0009967	5.9e-08	7.22937	1580	699	102	21331	CCL8,ADCYAP1R1,CCL12,IRF7,CD8A,TRIM30A,CCN3,ZC3HAV1,NLRC5,SYK,PTPRC,MMP12,TREM2,GRIN1,CARTPT,GREM1,TNFSF10,SPHK1,GPNMB,CCR1,IL7R,ZBP1,FGFBP1,TRIM30D,NOS1,BMP4,TMOD2,DHX58,RSAD2,TLR7,CASP4,CYFIP2,DGKD,CTSC,FCER1A,DCDC2A,LCK,CCBE1,THBS1,PTPN22,HAVCR2,SLC30A10,PTPN6,SRARP,MLKL,CHD5,CCL5,MAP3K8,ITGAL,ALPK1,CCL7,GPR183,GPR4,PRKCZ,FGR,LPAR6,LEPR,AKAP6,BMP6,PROK2,GM5127,CD3E,F10,CEACAM1,HTT,EDN1,GPR55,C…
GO:BP	organic anion transport	GO:0015711	5.95e-08	7.2252	498	699	48	21331	SLC7A11,SLC6A1,SLC22A8,SLC22A6,SLC13A3,SLCO1A4,SLC6A13,ABCB1A,SYT4,SLC6A20A,SYK,SLC1A3,SLC2A1,KCNJ10,CAR4,THBS1,SLC16A11,PLSCR2,CYP4F18,ATP10A,SLC23A2,SLC38A5,ABCC4,CACNA1A,STXBP1,PLSCR4,LRRC8D,ABCB1B,SLC22A2,SLCO2B1,RGS2,CEACAM1,ABCG2,EDN1,SLC7A2,ATP10D,SLC2A3,SLC22A3,ABCC1,SLC10A6,PLSCR1,PLA2G4A,SLC16A12,IRS2,SLC7A14,ABCA7,NMB,SLC1A5
GO:BP	negative regulation of multicellular organismal process	GO:0051241	6.21e-08	7.20725	1342	699	91	21331	ATP1A2,PTGDS,CBLN1,SEMA5B,CGA,SPTBN4,SP100,B2M,SYT4,TRIM30A,OSR1,AQP4,CCN3,NPR3,BST2,CNTN4,PTPRC,TREM2,GPR68,CARTPT,GREM1,GPNMB,PDCD1,CCR1,GFAP,HHIP,SPOCK1,VSIG4,PRG2,NOS1,BMP4,DHX58,CRMP1,CTSC,PGLYRP1,IRAK3,SEMA3D,TSPAN8,PLAC8,CXCL13,THBS1,PTPN22,TNFRSF11B,HAVCR2,NCKAP1L,ARRDC3,PTPN6,SERPINE1,KNG2,CD84,STAT1,CXCL10,CD274,GPR4,BCL2,RGS2,CEACAM1,ALOX12,ABCG2,NOS3,GPR55,SIGIRR,RORB,LFNG,WNT9B,LYN,E…
GO:BP	lymphocyte differentiation	GO:0030098	6.38e-08	7.19536	382	699	41	21331	POU2AF1,B2M,CD8A,SYK,PTPRC,IRF4,SPN,LY6D,IL7R,CD3G,BMP4,RSAD2,IKZF3,VAV1,CD79A,PGLYRP1,LCK,PTPN22,NCKAP1L,PTPN6,LY9,GPR183,PRKCZ,BCL2,LEPR,TNFSF8,CD3E,IL2RG,FCER1G,POU2F2,LFNG,CLEC4D,SPI1,DOCK2,NFKBIZ,INPP5D,IL18R1,CHD7,IKZF1,LMBR1L,PTK2B
GO:BP	divalent inorganic cation homeostasis	GO:0072507	6.47e-08	7.18925	534	699	50	21331	ATP1A2,SCGN,TAC4,ADCYAP1R1,TRPM1,PTPRC,GRIN1,C3AR1,CCR1,SLC8A1,TSPOAP1,NOS1,CD52,BMP4,CORO1A,ITPR3,LCK,CXCL13,SLC30A10,PTPN6,CCL5,CACNA1B,KNG2,CXCL10,CACNA1A,TRPM2,ATP2A3,GPR4,LPAR6,BCL2,AKAP6,GM5127,ACKR2,HTT,FCRL5,EDN1,GPR55,ANK3,HAP1,LYN,CXCR2,ADRB2,TFAP2B,CACNB2,CHD7,PRNP,NMB,CCL2,ADCY5,PTK2B
GO:BP	calcium ion homeostasis	GO:0055074	6.85e-08	7.16421	500	699	48	21331	ATP1A2,SCGN,TAC4,ADCYAP1R1,TRPM1,PTPRC,GRIN1,C3AR1,CCR1,SLC8A1,TSPOAP1,NOS1,CD52,BMP4,CORO1A,ITPR3,LCK,CXCL13,PTPN6,CCL5,CACNA1B,KNG2,CXCL10,CACNA1A,TRPM2,ATP2A3,GPR4,LPAR6,BCL2,AKAP6,GM5127,ACKR2,HTT,FCRL5,EDN1,GPR55,HAP1,LYN,CXCR2,ADRB2,TFAP2B,CACNB2,CHD7,PRNP,NMB,CCL2,ADCY5,PTK2B
GO:BP	chemical homeostasis	GO:0048878	7.4e-08	7.13051	1240	699	86	21331	ATP1A2,SCGN,SLC7A11,TAC4,SCD1,ADCYAP1R1,B2M,TRPM1,AQP4,EPHA5,PTPRC,GRIN1,GPR68,CARTPT,C3AR1,CCR1,SLC8A1,VCAM1,TSPOAP1,NOS1,CD52,BMP4,CORO1A,FGF12,ITPR3,KCNJ10,PTPRN,LCK,CXCL13,CAR4,HK2,SLC30A10,GCLC,PTPN6,FGF7,CCL5,CACNA1B,KNG2,STAT1,CXCL10,CACNA1A,TRPM2,ATP2A3,GPR4,LSR,LPAR6,BCL2,LEPR,AKAP6,BMP6,GM5127,ACKR2,SOAT1,ALOX12,HTT,FCRL5,EDN1,GPR55,NAPSA,PIWIL4,DGAT2,ANK3,HAP1,LYN,CXCR2,ADRB2,TFAP2B,PL…
GO:BP	regulation of signal transduction	GO:0009966	7.69e-08	7.11434	2877	699	157	21331	LY6C2,CBLN1,CCL8,CGA,CD22,ADCYAP1R1,CCL12,IRF7,LY6A,SP100,CD8A,TRIM30A,RNF213,CCN3,ZC3HAV1,GARNL3,NLRC5,NKD2,SYK,PTPRC,IRF4,MMP12,TREM2,GRIN1,CARTPT,GREM1,TNFSF10,SPHK1,GPNMB,MYOF,CCR1,IL7R,ZBP1,HHIP,FGFBP1,PHF24,CXCL12,TRIM30D,MAPT,NOS1,BMP4,EPS8L1,TMOD2,DHX58,RSAD2,LAX1,TLR7,CASP4,CYFIP2,DGKD,CTSC,FCER1A,IRAK3,DCDC2A,PLEK,LCK,CCBE1,THBS1,PTPN22,HAVCR2,SLC30A10,SEZ6L,HMGB2,ARRDC3,GCLC,PTPN6,SRAR…
GO:BP	cellular calcium ion homeostasis	GO:0006874	8.02e-08	7.09586	485	699	47	21331	ATP1A2,SCGN,TAC4,ADCYAP1R1,TRPM1,PTPRC,GRIN1,C3AR1,CCR1,SLC8A1,TSPOAP1,NOS1,CD52,BMP4,CORO1A,ITPR3,LCK,CXCL13,PTPN6,CCL5,CACNA1B,KNG2,CXCL10,CACNA1A,TRPM2,ATP2A3,GPR4,LPAR6,BCL2,AKAP6,GM5127,ACKR2,HTT,FCRL5,EDN1,GPR55,HAP1,LYN,CXCR2,ADRB2,CACNB2,CHD7,PRNP,NMB,CCL2,ADCY5,PTK2B
GO:BP	positive regulation of response to biotic stimulus	GO:0002833	8.58e-08	7.06662	154	699	25	21331	IRF7,IFI211,IFI213,ZC3HAV1,NLRC5,MMP12,ZBP1,IFI207,DHX58,IFI204,VAV1,IL18RAP,HAVCR2,HMGB2,MNDAL,IFI203,IFI209,CD274,BMP6,IFI206,GBP5,PLSCR1,IFI208,AIM2,IRGM1
GO:BP	locomotion	GO:0040011	8.68e-08	7.06141	1815	699	112	21331	ATP1A2,PRRXL1,SEMA5B,CCL8,PHACTR1,CCL12,SP100,ALCAM,BIN2,PRTN3,CCN3,EPHA5,BST2,CNTN4,SYK,PTPRC,MMP12,TREM2,GRIN1,SPN,GREM1,C3AR1,SPHK1,GPNMB,CCR1,SLC8A1,FGFBP1,VCAM1,SHTN1,CXCL12,MAPT,BMP4,CORO1A,CPEB1,CRMP1,ITGB7,VAV1,DCDC2A,SEMA3D,ITGB2,IFITM1,PLA2G7,CXCL13,CCBE1,THBS1,LAMA1,PTPN22,HMGB2,NCKAP1L,ARRDC3,MEGF10,PGF,FGF7,CCL5,SERPINE1,TUBB2B,ANXA3,ITGAL,CCL7,CXCL10,CH25H,FOXF1,IL17RA,TRPM2,ASTN1,C…
GO:BP	ion homeostasis	GO:0050801	1.04e-07	6.98108	840	699	66	21331	ATP1A2,SCGN,SLC7A11,TAC4,ADCYAP1R1,B2M,TRPM1,PTPRC,GRIN1,C3AR1,CCR1,SLC8A1,TSPOAP1,NOS1,CD52,BMP4,CORO1A,FGF12,ITPR3,KCNJ10,LCK,CXCL13,CAR4,SLC30A10,GCLC,PTPN6,CCL5,CACNA1B,KNG2,CXCL10,CACNA1A,TRPM2,ATP2A3,GPR4,LPAR6,BCL2,AKAP6,BMP6,GM5127,ACKR2,ALOX12,HTT,FCRL5,EDN1,GPR55,DGAT2,ANK3,HAP1,LYN,CXCR2,ADRB2,TFAP2B,SCN3B,SLC9A2,CP,CAR14,CACNB2,CHD7,ROGDI,PRNP,NMB,ENPP1,CCL2,ADCY5,SLC25A28,PTK2B
GO:BP	T cell proliferation	GO:0042098	1.11e-07	6.95592	208	699	29	21331	SYK,PTPRC,SPN,CD6,GPNMB,SLFN1,VCAM1,CXCL12,VSIG4,BMP4,CORO1A,PTPN22,HAVCR2,NCKAP1L,ICOSL,PTPN6,CCL5,ITGAL,CD274,RAC2,CD3E,CEACAM1,CTPS,DOCK2,RASAL3,PDE5A,PRNP,IL12RB1,LMBR1L
GO:BP	positive regulation of innate immune response	GO:0045089	1.15e-07	6.94062	109	699	21	21331	IRF7,IFI211,IFI213,NLRC5,MMP12,ZBP1,IFI207,IFI204,VAV1,IL18RAP,HAVCR2,HMGB2,MNDAL,IFI203,IFI209,IFI206,GBP5,PLSCR1,IFI208,AIM2,IRGM1
GO:BP	cellular chemical homeostasis	GO:0055082	1.18e-07	6.92852	862	699	67	21331	ATP1A2,SCGN,TAC4,ADCYAP1R1,TRPM1,AQP4,EPHA5,PTPRC,GRIN1,GPR68,CARTPT,C3AR1,CCR1,SLC8A1,VCAM1,TSPOAP1,NOS1,CD52,BMP4,CORO1A,ITPR3,PTPRN,LCK,CXCL13,HK2,SLC30A10,GCLC,PTPN6,CCL5,CACNA1B,KNG2,CXCL10,CACNA1A,TRPM2,ATP2A3,GPR4,LPAR6,BCL2,LEPR,AKAP6,BMP6,GM5127,ACKR2,HTT,FCRL5,EDN1,GPR55,PIWIL4,DGAT2,HAP1,LYN,CXCR2,ADRB2,TFAP2B,ICAM1,SLC9A2,CP,IRS2,CACNB2,CHD7,ROGDI,PRNP,NMB,ENPP1,CCL2,ADCY5,PTK2B
GO:BP	regulation of metal ion transport	GO:0010959	1.42e-07	6.84713	425	699	43	21331	ATP1A2,SPTBN4,ADCYAP1R1,CCL12,B2M,DPP6,OSR1,TREM2,GRIN1,CCR1,SLC8A1,CXCL12,NOS1,BMP4,CORO1A,FGF12,PTPN22,SLC30A10,PTPN6,CCL5,CACNA1B,CD84,CXCL10,CACNA1A,HPCA,BCL2,AKAP6,HTT,FCRL5,NOS3,ANK3,HAP1,LYN,CXCR4,ADRB2,SCN3B,ICAM1,LILRA5,CACNB2,CHD7,PRNP,SARAF,PTK2B
GO:BP	lymphocyte mediated immunity	GO:0002449	1.47e-07	6.83357	376	699	40	21331	IGHA,IGLC1,C4B,IRF7,B2M,CD8A,PTPRC,IGLC2,SPN,IL7R,RAB27A,TAP1,CORO1A,FCGR1,RSAD2,CTSC,VAV1,FCER1A,C1QA,IL18RAP,HAVCR2,ICOSL,PTPN6,C6,C1QB,TRBC2,PIRB,IGHD,PRKCZ,C1RA,CEACAM1,FCER1G,DPP4,POU2F2,C3,ICAM1,IGHG3,CLEC2D,INPP5D,IL18R1
GO:BP	positive regulation of locomotion	GO:0040017	1.53e-07	6.81621	601	699	53	21331	SEMA5B,CCL12,PTPRC,TREM2,GRIN1,SPN,C3AR1,SPHK1,GPNMB,CCR1,SLC8A1,FGFBP1,SHTN1,CXCL12,BMP4,CORO1A,CPEB1,SEMA3D,PLA2G7,CXCL13,CCBE1,THBS1,NCKAP1L,PGF,FGF7,CCL5,SERPINE1,TUBB2B,ANXA3,CCL7,CXCL10,FOXF1,CD274,RAC2,FGR,BCL2,ALOX12,EDN1,NOS3,LYN,ABCC1,ELANE,CXCR4,CXCR2,ITGA2B,ICAM1,DOCK5,IRS2,SEMA3E,CCL2,F7,ITGAX,PTK2B
GO:BP	cellular divalent inorganic cation homeostasis	GO:0072503	1.56e-07	6.80592	512	699	48	21331	ATP1A2,SCGN,TAC4,ADCYAP1R1,TRPM1,PTPRC,GRIN1,C3AR1,CCR1,SLC8A1,TSPOAP1,NOS1,CD52,BMP4,CORO1A,ITPR3,LCK,CXCL13,SLC30A10,PTPN6,CCL5,CACNA1B,KNG2,CXCL10,CACNA1A,TRPM2,ATP2A3,GPR4,LPAR6,BCL2,AKAP6,GM5127,ACKR2,HTT,FCRL5,EDN1,GPR55,HAP1,LYN,CXCR2,ADRB2,CACNB2,CHD7,PRNP,NMB,CCL2,ADCY5,PTK2B
GO:BP	regulation of regulated secretory pathway	GO:1903305	1.58e-07	6.80153	171	699	26	21331	SYT1,DOC2A,SYT4,CADPS,SYK,RAB27A,NRXN3,FCER1A,ITGB2,STXBP2,CACNA1B,CD84,SYT10,FOXF1,CACNA1A,STXBP1,RAC2,FGR,CEACAM1,FCER1G,LYN,SYT5,ADRB2,ADCY1,CACNB2,SYT7
GO:BP	positive regulation of cell motility	GO:2000147	1.74e-07	6.75823	585	699	52	21331	SEMA5B,CCL12,PTPRC,TREM2,GRIN1,SPN,C3AR1,SPHK1,GPNMB,CCR1,SLC8A1,FGFBP1,SHTN1,CXCL12,BMP4,CORO1A,CPEB1,SEMA3D,PLA2G7,CXCL13,CCBE1,THBS1,NCKAP1L,PGF,FGF7,CCL5,SERPINE1,ANXA3,CCL7,CXCL10,FOXF1,CD274,RAC2,FGR,BCL2,ALOX12,EDN1,NOS3,LYN,ABCC1,ELANE,CXCR4,CXCR2,ITGA2B,ICAM1,DOCK5,IRS2,SEMA3E,CCL2,F7,ITGAX,PTK2B
GO:BP	regulation of cell population proliferation	GO:0042127	1.76e-07	6.75365	1768	699	109	21331	PTGDS,SLC7A11,CCL12,ACER2,B2M,OSR1,CCN3,NPR3,IFIT3,SLFN2,SYK,PTPRC,MMP12,SPN,GREM1,CD6,C3AR1,SPHK1,IFITM3,GPNMB,IL7R,SKAP2,GFAP,SLFN1,FGFBP1,VCAM1,CXCL12,VSIG4,PDE1A,VIPR2,NOS1,BMP4,CORO1A,CPEB1,IKZF3,APOBEC1,PTPRN,IFITM1,PLAC8,ADAM33,LCK,THBS1,PTPN22,HAVCR2,HMGB2,FBXO2,NCKAP1L,ICOSL,PTPN6,MEGF10,PGF,FGF7,CHD5,CCL5,ITGAL,IGHD,SLA,STAT1,CD37,CXCL10,CDKN2C,ABCC4,FOXF1,CD274,GPR183,RAC2,PRKCZ,FGR,JA…
GO:BP	negative regulation of viral life cycle	GO:1903901	1.85e-07	6.73376	80	699	18	21331	OASL2,ZC3HAV1,BST2,OAS1A,OAS2,IFITM3,ISG15,OASL1,RSAD2,OAS3,IFITM1,CCL5,OAS1G,IFITM6,APOBEC3,PLSCR1,MX2,PARP10
GO:BP	response to wounding	GO:0009611	1.91e-07	6.71835	515	699	48	21331	SLC7A11,SYK,SLC1A3,MMP12,MYOF,GFAP,RAB27A,DCBLD2,CRMP1,PLEK,TSPAN8,THBS1,PTPN6,FGF7,SERPINE1,KNG2,FCGR4,DST,TREML1,FOXF1,STXBP1,MMRN1,GPR4,JAML,BCL2,SRSF5,F10,CEACAM1,FCER1G,ALOX12,C3,LYN,TNR,CXCR4,ADRB2,ITGA2B,PLA2G4A,LCP1,CTNNA1,HPSE,CXADR,SYTL4,VWF,CCL2,SYT7,NDNF,F7,ENTPD1
GO:BP	calcium ion transport	GO:0006816	1.92e-07	6.71659	429	699	43	21331	ATP1A2,ADCYAP1R1,CCL12,TRPM1,PTPRC,GRIN1,CCR1,SLC8A1,CXCL12,NOS1,BMP4,CORO1A,ITPR3,TRPM6,LCK,PTPN22,PTPN6,TMEM37,CCL5,CACNA1B,CD84,CXCL10,CACNA1A,TRPM2,RAMP1,ATP2A3,HPCA,BCL2,AKAP6,HTT,FCRL5,NOS3,HAP1,LYN,CXCR4,ADRB2,ICAM1,LILRA5,CACNB2,CHD7,PRNP,SARAF,PTK2B
GO:BP	regulation of lymphocyte activation	GO:0051249	1.98e-07	6.7034	551	699	50	21331	IGHA,IGLC1,SYK,PTPRC,IGLC2,SAMSN1,SPN,CD6,GPNMB,IL7R,SLFN1,CD5,VCAM1,VSIG4,BMP4,CORO1A,LAX1,IKZF3,PGLYRP1,LCK,PTPN22,HAVCR2,NCKAP1L,ICOSL,PTPN6,CCL5,ITGAL,TRBC2,IGHD,CD274,GPR183,RAC2,PRKCZ,FGR,BCL2,CD3E,IL2RG,CEACAM1,DPP4,LYN,RASAL3,NFKBIZ,IGHG3,SIRPB1C,INPP5D,IRS2,PDE5A,PRNP,IL12RB1,CCL2
GO:BP	regulation of developmental process	GO:0050793	2.55e-07	6.59279	2824	699	153	21331	SYT1,ACHE,CBLN1,SEMA5B,CCL8,CGA,SPTBN4,PHACTR1,SGIP1,CCL12,SP100,B2M,ABCB1A,SYT4,MAP6,OSR1,CCN3,CYBB,CNTN4,SYK,PTPRC,MMP12,CD53,TREM2,GRIN1,OAS2,GPR68,CARTPT,GREM1,C3AR1,SPHK1,PDCD1,CCR1,IL7R,GFAP,SLC8A1,HHIP,SPOCK1,FGFBP1,SHTN1,CXCL12,WNT6,MAPT,NOS1,ISG15,BMP4,CORO1A,CPEB1,CRMP1,IFI204,IKZF3,CTSC,PGLYRP1,IRAK3,SH3GL3,SEMA3D,ITGB2,IFITM1,PLAC8,LCK,CCBE1,THBS1,LAMA1,TNFRSF11B,HK2,HAVCR2,SLC30A10,H…
GO:BP	positive regulation of cellular component movement	GO:0051272	2.64e-07	6.57878	610	699	53	21331	SEMA5B,CCL12,PTPRC,TREM2,GRIN1,SPN,C3AR1,SPHK1,GPNMB,CCR1,SLC8A1,FGFBP1,SHTN1,CXCL12,BMP4,CORO1A,CPEB1,SEMA3D,PLA2G7,CXCL13,CCBE1,THBS1,NCKAP1L,PGF,FGF7,CCL5,SERPINE1,TUBB2B,ANXA3,CCL7,CXCL10,FOXF1,CD274,RAC2,FGR,BCL2,ALOX12,EDN1,NOS3,LYN,ABCC1,ELANE,CXCR4,CXCR2,ITGA2B,ICAM1,DOCK5,IRS2,SEMA3E,CCL2,F7,ITGAX,PTK2B
GO:BP	signal release	GO:0023061	2.64e-07	6.57816	647	699	55	21331	SYT1,ILDR2,CGA,DOC2A,SYT4,NNAT,CADPS,CCN3,EPHA5,SCG5,SYK,GPR68,CARTPT,SPHK1,CXCL12,NOS1,NRXN3,FCER1A,PTPRN,HAVCR2,STXBP2,CCL5,CACNA1B,SYT10,LCP2,ABCC4,CACNA1A,STXBP1,TRPM2,IFIH1,FGR,LEPR,BMP6,FCER1G,EDN1,PIWIL4,BMP8A,LYN,SYT5,ADRB2,TFAP2B,PLA2G4A,CD14,LILRA5,ADCY1,SYN2,IRS2,CACNB2,SYTL4,CHD7,NMB,ADCY5,SYT7,ENTPD1,SNCG
GO:BP	cell killing	GO:0001906	2.65e-07	6.57727	162	699	25	21331	B2M,SYK,PTPRC,CTSG,IL7R,RAB27A,CXCL12,TAP1,CORO1A,FCGR1,CTSC,VAV1,PGLYRP1,IL18RAP,CXCL13,HAVCR2,STXBP2,PTPN6,CXCL10,CEACAM1,C3,NCF1,ELANE,CLEC2D,CCL2
GO:BP	movement of cell or subcellular component	GO:0006928	2.91e-07	6.53685	2060	699	121	21331	ATP1A2,PRRXL1,SEMA5B,CCL8,PHACTR1,CCL12,SP100,ALCAM,BIN2,MAP6,PRTN3,AQP4,CCN3,EPHA5,BST2,CNTN4,SYK,PTPRC,MMP12,TREM2,GRIN1,SPN,GREM1,C3AR1,SPHK1,GPNMB,CCR1,SLC8A1,FGFBP1,VCAM1,SHTN1,CXCL12,MAPT,NOS1,BMP4,CORO1A,CPEB1,CRMP1,MGARP,ITGB7,VAV1,DCDC2A,SEMA3D,ITGB2,IFITM1,PLA2G7,CXCL13,CCBE1,THBS1,LAMA1,PTPN22,HMGB2,NCKAP1L,MEGF10,PGF,FGF7,CCL5,SERPINE1,TUBB2B,DST,ANXA3,ITGAL,CCL7,CXCL10,CH25H,FOXF1,IL…
GO:BP	regulation of chemotaxis	GO:0050920	3.08e-07	6.51158	231	699	30	21331	SEMA5B,CCL12,CCN3,TREM2,GREM1,C3AR1,CCR1,CXCL12,SEMA3D,PLA2G7,CXCL13,THBS1,NCKAP1L,PGF,CCL5,SERPINE1,TUBB2B,CCL7,CXCL10,GPR183,RAC2,DPP4,EDN1,LYN,CXCR4,CXCR2,SEMA3E,CCL2,F7,PTK2B
GO:BP	organic substance transport	GO:0071702	3.67e-07	6.43476	2593	699	143	21331	SYT1,CBLN1,ILDR2,PPP2R2B,SLC7A11,SLC6A1,SLC22A8,SLC22A6,SLC13A3,SLCO1A4,SP100,SLC6A2,SLC6A13,ABCB1A,SYT4,NNAT,CADPS,OSR1,AQP4,CCN3,EPHA5,SCG5,SLC6A20A,RTP4,SYK,SLC1A3,MMP12,TREM2,SLC2A1,GPR68,CARTPT,DERL3,RAB27A,CXCL12,TAP1,MAPT,CD3G,NOS1,BMP4,CPEB1,MGARP,RSAD2,LAX1,DGKD,KCNJ10,FCER1A,APOBEC1,PTPRN,APOL11B,PLEK,CAR4,THBS1,PTPN22,MLC1,SLC16A11,HK2,LRAT,HAVCR2,PLSCR2,CYP4F18,ARRDC3,STXBP2,ATP10A,SL…
GO:BP	cell motility	GO:0048870	3.86e-07	6.41386	1633	699	102	21331	PRRXL1,SEMA5B,CCL8,PHACTR1,CCL12,SP100,BIN2,PRTN3,CCN3,BST2,SYK,PTPRC,MMP12,TREM2,GRIN1,SPN,GREM1,C3AR1,SPHK1,GPNMB,CCR1,SLC8A1,FGFBP1,VCAM1,SHTN1,CXCL12,MAPT,BMP4,CORO1A,CPEB1,CRMP1,ITGB7,VAV1,DCDC2A,SEMA3D,ITGB2,IFITM1,PLA2G7,CXCL13,CCBE1,THBS1,LAMA1,PTPN22,HMGB2,NCKAP1L,MEGF10,PGF,FGF7,CCL5,SERPINE1,TUBB2B,ANXA3,ITGAL,CCL7,CXCL10,CH25H,FOXF1,IL17RA,TRPM2,ASTN1,CD274,GPR183,RAC2,PRKCZ,FGR,JAML,…
GO:BP	localization of cell	GO:0051674	3.86e-07	6.41386	1633	699	102	21331	PRRXL1,SEMA5B,CCL8,PHACTR1,CCL12,SP100,BIN2,PRTN3,CCN3,BST2,SYK,PTPRC,MMP12,TREM2,GRIN1,SPN,GREM1,C3AR1,SPHK1,GPNMB,CCR1,SLC8A1,FGFBP1,VCAM1,SHTN1,CXCL12,MAPT,BMP4,CORO1A,CPEB1,CRMP1,ITGB7,VAV1,DCDC2A,SEMA3D,ITGB2,IFITM1,PLA2G7,CXCL13,CCBE1,THBS1,LAMA1,PTPN22,HMGB2,NCKAP1L,MEGF10,PGF,FGF7,CCL5,SERPINE1,TUBB2B,ANXA3,ITGAL,CCL7,CXCL10,CH25H,FOXF1,IL17RA,TRPM2,ASTN1,CD274,GPR183,RAC2,PRKCZ,FGR,JAML,…
GO:BP	regulation of leukocyte chemotaxis	GO:0002688	4.11e-07	6.38655	128	699	22	21331	CCL12,CCN3,GREM1,C3AR1,CCR1,CXCL12,PLA2G7,CXCL13,NCKAP1L,PGF,CCL5,SERPINE1,CCL7,CXCL10,RAC2,DPP4,EDN1,LYN,CXCR2,CCL2,F7,PTK2B
GO:BP	anion transmembrane transport	GO:0098656	4.24e-07	6.37251	309	699	35	21331	SLC7A11,SLC6A1,SLC22A6,GABRD,SLC13A3,SLC6A13,ABCB1A,OSR1,SLC6A20A,SLC1A3,SLC2A1,GABRR3,KCNJ10,THBS1,SLC16A11,CLIC5,SLC23A2,CLCA3A1,SLC38A5,SLC5A5,LRRC8D,TTYH1,SLC22A2,RGS2,SLC7A2,SLC13A4,SLC20A1,ABCC1,SLC9A2,SLC16A12,LRRC8B,IRS2,SLC7A14,PRNP,SLC1A5
GO:BP	neurotransmitter transport	GO:0006836	4.37e-07	6.35968	220	699	29	21331	ATP1A2,SYT1,SLC6A1,DOC2A,SLC6A2,SLC6A13,SYT4,SV2B,CADPS,SPHK1,GFAP,NOS1,NRXN3,KCNJ10,STXBP2,CACNA1B,SYT10,SLC28A2,CACNA1A,STXBP1,SLC22A2,SLC22A3,SYT5,ADRB2,ADCY1,SYN2,CACNB2,SYT7,SNCG
GO:BP	positive regulation of intracellular signal transduction	GO:1902533	4.37e-07	6.35925	990	699	72	21331	CCL8,ADCYAP1R1,CCL12,CD8A,TRIM30A,ZC3HAV1,SYK,PTPRC,TREM2,CARTPT,GREM1,TNFSF10,SPHK1,GPNMB,CCR1,TRIM30D,NOS1,BMP4,DHX58,TLR7,FCER1A,LCK,THBS1,PTPN22,HAVCR2,SLC30A10,PTPN6,MLKL,CHD5,CCL5,MAP3K8,ITGAL,ALPK1,CCL7,GPR183,GPR4,PRKCZ,FGR,LPAR6,LEPR,AKAP6,PROK2,GM5127,CD3E,F10,CEACAM1,HTT,EDN1,GPR55,C3,HAP1,NCF1,FGFBP3,LYN,PIK3R5,DOCK2,RASD2,PLSCR1,ADRB2,ICAM1,CD14,LILRA5,CLU,HPSE,UBD,DIXDC1,IL18R1,PDE5…
GO:BP	phagocytosis	GO:0006909	4.4e-07	6.35643	341	699	37	21331	IGHA,IGLC1,BIN2,PRTN3,SYK,PTPRC,TREM2,IGLC2,SPHK1,RAB27A,CORO1A,FCGR1,VAV1,ITGB2,IRF8,THBS1,NCKAP1L,MEGF10,ANXA3,ITGAL,TRBC2,IGHD,RAC2,FGR,LEPR,IL2RG,FCER1G,C3,ELANE,DOCK2,CD300LF,IGHG3,SIRPB1C,ABCA7,CCL2,SYT7,HCK
GO:BP	negative regulation of cellular process	GO:0048523	4.78e-07	6.32027	5029	699	237	21331	ATP1A2,C4B,PTGDS,CBLN1,SEMA5B,SLC7A11,SLC6A1,SPTBN4,PHACTR1,CD22,ADCYAP1R1,CCL12,IFI211,IFI213,ACER2,ASS1,PPP1R1A,SP100,B2M,ABCB1A,SYT4,TRIM30A,RNF213,OSR1,NAIP5,PRTN3,AQP4,CCN3,EPHA5,NPR3,BST2,IFIT3,NLRC5,NKD2,CNTN4,SLFN2,PTPRC,IRF4,MMP12,TREM2,GRIN1,SAMSN1,SPN,MAPK12,GPR68,CARTPT,GREM1,SPHK1,DERL3,IFITM3,GPNMB,CIART,PDCD1,IL7R,SKAP2,GFAP,SLC8A1,HHIP,SPOCK1,SLFN1,CXCL12,TAP1,NAIP2,VSIG4,MAPT,VIP…
GO:BP	regulation of viral genome replication	GO:0045069	4.85e-07	6.31414	95	699	19	21331	OASL2,ZC3HAV1,BST2,OAS1A,OAS2,IFITM3,ISG15,OASL1,RSAD2,OAS3,IFITM1,CCL5,OAS1G,IFITM6,BCL2,APOBEC3,PLSCR1,MX2,PARP10
GO:BP	leukocyte degranulation	GO:0043299	5.47e-07	6.26222	75	699	17	21331	PTGDS,TAC4,SYK,RAB27A,CORO1A,FCER1A,ITGB2,STXBP2,ANXA3,CD84,FOXF1,STXBP1,RAC2,FGR,CEACAM1,FCER1G,LYN
GO:BP	blood coagulation	GO:0007596	6.69e-07	6.17473	169	699	25	21331	SLC7A11,SYK,RAB27A,PLEK,TSPAN8,THBS1,PTPN6,SERPINE1,KNG2,TREML1,STXBP1,MMRN1,F10,CEACAM1,FCER1G,ALOX12,C3,LYN,ADRB2,ITGA2B,PLA2G4A,HPSE,VWF,F7,ENTPD1
GO:BP	regulation of secretion	GO:0051046	6.7e-07	6.17418	818	699	63	21331	SYT1,SLC6A1,TAC4,SLCO1A4,DOC2A,SYT4,NNAT,CADPS,CCN3,EPHA5,SCG5,SYK,TREM2,OAS2,GPR68,CARTPT,SPHK1,RAB27A,CXCL12,NOS1,NRXN3,RSAD2,FCER1A,ITGB2,HAVCR2,CYP4F18,STXBP2,CCL5,CACNA1B,CD84,SYT10,FOXF1,CACNA1A,STXBP1,TRPM2,IFIH1,RAC2,FGR,LEPR,BMP6,CEACAM1,FCER1G,EDN1,PIWIL4,HAP1,BMP8A,LYN,SYT5,ADRB2,TFAP2B,PLA2G4A,CD14,LILRA5,ADCY1,IRS2,CACNB2,SYTL4,CHD7,NMB,ADCY5,SYT7,ENTPD1,SNCG
GO:BP	wound healing	GO:0042060	6.84e-07	6.16511	379	699	39	21331	SLC7A11,SYK,MMP12,MYOF,RAB27A,DCBLD2,PLEK,TSPAN8,THBS1,PTPN6,FGF7,SERPINE1,KNG2,FCGR4,DST,TREML1,STXBP1,MMRN1,GPR4,JAML,F10,CEACAM1,FCER1G,ALOX12,C3,LYN,CXCR4,ADRB2,ITGA2B,PLA2G4A,HPSE,CXADR,SYTL4,VWF,CCL2,SYT7,NDNF,F7,ENTPD1
GO:BP	exocytosis	GO:0006887	7.66e-07	6.11555	364	699	38	21331	SYT1,PTGDS,TAC4,DOC2A,SYT4,CADPS,NKD2,SYK,CCR1,RAB27A,NRXN3,CORO1A,FCER1A,PLEK,ITGB2,STXBP2,CCL5,CACNA1B,ANXA3,CD84,SYT10,FOXF1,CACNA1A,STXBP1,RAC2,FGR,CEACAM1,FCER1G,HAP1,LYN,SYT5,ADRB2,ADCY1,SYN2,CACNB2,SYTL4,SYT7,HCK
GO:BP	metal ion transport	GO:0030001	7.83e-07	6.10625	881	699	66	21331	ATP1A2,SLC6A1,SPTBN4,ADCYAP1R1,CCL12,SLC13A3,B2M,DPP6,TRPM1,OSR1,PTPRC,SLC1A3,TREM2,GRIN1,CCR1,SLC8A1,CXCL12,KCNT1,NOS1,BMP4,CORO1A,FGF12,ITPR3,KCNJ10,TRPM6,LCK,PTPN22,SLC30A10,PTPN6,SLC23A2,TMEM37,CCL5,CACNA1B,CD84,CXCL10,CACNA1A,TRPM2,RAMP1,ATP2A3,HPCA,BCL2,AKAP6,HTT,FCRL5,NOS3,SLC13A4,ASIC2,ANK3,HAP1,SLC20A1,LYN,SLC10A6,CXCR4,ADRB2,SCN3B,ICAM1,SLC9A2,CP,LILRA5,CACNB2,CHD7,PRNP,SARAF,KCNMB2,SLC…
GO:BP	regulation of T cell activation	GO:0050863	7.84e-07	6.10595	316	699	35	21331	SYK,PTPRC,SPN,CD6,GPNMB,IL7R,SLFN1,CD5,VCAM1,VSIG4,BMP4,CORO1A,LAX1,LCK,PTPN22,HAVCR2,NCKAP1L,ICOSL,PTPN6,CCL5,ITGAL,CD274,RAC2,PRKCZ,CD3E,IL2RG,CEACAM1,DPP4,RASAL3,NFKBIZ,SIRPB1C,PDE5A,PRNP,IL12RB1,CCL2
GO:BP	neutrophil chemotaxis	GO:0030593	8.26e-07	6.08302	109	699	20	21331	CCL8,CCL12,SYK,C3AR1,VAV1,ITGB2,CXCL13,NCKAP1L,CCL5,CCL7,CXCL10,RAC2,JAML,FCER1G,DPP4,EDN1,CXCR2,CSF3R,CXADR,CCL2
GO:BP	hemostasis	GO:0007599	8.63e-07	6.0638	171	699	25	21331	SLC7A11,SYK,RAB27A,PLEK,TSPAN8,THBS1,PTPN6,SERPINE1,KNG2,TREML1,STXBP1,MMRN1,F10,CEACAM1,FCER1G,ALOX12,C3,LYN,ADRB2,ITGA2B,PLA2G4A,HPSE,VWF,F7,ENTPD1
GO:BP	inorganic ion homeostasis	GO:0098771	9.48e-07	6.02313	766	699	60	21331	ATP1A2,SCGN,TAC4,ADCYAP1R1,B2M,TRPM1,PTPRC,GRIN1,C3AR1,CCR1,SLC8A1,TSPOAP1,NOS1,CD52,BMP4,CORO1A,ITPR3,KCNJ10,LCK,CXCL13,CAR4,SLC30A10,PTPN6,CCL5,CACNA1B,KNG2,CXCL10,CACNA1A,TRPM2,ATP2A3,GPR4,LPAR6,BCL2,AKAP6,BMP6,GM5127,ACKR2,HTT,FCRL5,EDN1,GPR55,ANK3,HAP1,LYN,CXCR2,ADRB2,TFAP2B,SLC9A2,CP,CAR14,CACNB2,CHD7,ROGDI,PRNP,NMB,ENPP1,CCL2,ADCY5,SLC25A28,PTK2B
GO:BP	response to lipid	GO:0033993	9.53e-07	6.02095	987	699	71	21331	ATP1A2,PTGDS,SLC6A1,SCD1,ADCYAP1R1,CCL12,SLCO1A4,ACER2,ASS1,B2M,OSR1,EPHA5,CYBB,TREM2,CTSG,CD6,VCAM1,NOS1,SGMS1,BMP4,CPEB1,ACSBG1,MGARP,IRAK3,IRF8,CXCL13,THBS1,PTPN22,MLC1,LRAT,HAVCR2,PLSCR2,HMGB2,SRARP,MPO,CCL5,SERPINE1,CACNA1B,FCGR4,ANXA3,CXCL10,STXBP1,CD274,PLSCR4,BCL2,BMP6,CMPK2,ALOX12,FLT3,LRP8,ABCG2,EDN1,NOS3,MGST1,DGAT2,RORB,LYN,ELANE,PLSCR1,AANAT,BCHE,CD14,CLU,ADCY1,ACR,EPHX1,CCL2,ADCY5,F…
GO:BP	regulation of T cell proliferation	GO:0042129	9.8e-07	6.00898	172	699	25	21331	SYK,PTPRC,SPN,CD6,GPNMB,SLFN1,VCAM1,VSIG4,BMP4,CORO1A,PTPN22,HAVCR2,NCKAP1L,ICOSL,PTPN6,CCL5,ITGAL,CD274,RAC2,CD3E,CEACAM1,RASAL3,PDE5A,PRNP,IL12RB1
GO:BP	coagulation	GO:0050817	9.8e-07	6.00898	172	699	25	21331	SLC7A11,SYK,RAB27A,PLEK,TSPAN8,THBS1,PTPN6,SERPINE1,KNG2,TREML1,STXBP1,MMRN1,F10,CEACAM1,FCER1G,ALOX12,C3,LYN,ADRB2,ITGA2B,PLA2G4A,HPSE,VWF,F7,ENTPD1
GO:BP	organic acid transport	GO:0015849	1e-06	6.00017	351	699	37	21331	SLC7A11,SLC6A1,SLC22A6,SLC13A3,SLCO1A4,SLC6A13,SYT4,OSR1,SLC6A20A,SYK,SLC1A3,SLC2A1,KCNJ10,THBS1,SLC16A11,CYP4F18,SLC23A2,SLC38A5,ABCC4,CACNA1A,STXBP1,LRRC8D,SLC22A2,SLCO2B1,RGS2,CEACAM1,EDN1,SLC7A2,SLC22A3,ABCC1,SLC10A6,PLA2G4A,SLC16A12,IRS2,SLC7A14,NMB,SLC1A5
GO:BP	regulation of secretion by cell	GO:1903530	1.15994e-06	5.93556	731	699	58	21331	SYT1,DOC2A,SYT4,NNAT,CADPS,CCN3,EPHA5,SCG5,SYK,TREM2,GPR68,CARTPT,SPHK1,RAB27A,CXCL12,NOS1,NRXN3,RSAD2,FCER1A,ITGB2,HAVCR2,STXBP2,CCL5,CACNA1B,CD84,SYT10,FOXF1,CACNA1A,STXBP1,TRPM2,IFIH1,RAC2,FGR,LEPR,BMP6,CEACAM1,FCER1G,EDN1,PIWIL4,HAP1,BMP8A,LYN,SYT5,ADRB2,TFAP2B,PLA2G4A,CD14,LILRA5,ADCY1,IRS2,CACNB2,SYTL4,CHD7,NMB,ADCY5,SYT7,ENTPD1,SNCG
GO:BP	cellular response to oxygen-containing compound	GO:1901701	1.16931e-06	5.93207	1245	699	83	21331	LY6C2,CCL12,LY6A,ASS1,B2M,OSR1,AQP4,EPHA5,CYBB,TREM2,CTSG,GPR68,CD6,SPHK1,GUCY1B1,SLC8A1,VCAM1,NOS1,SGMS1,BMP4,CPEB1,MGARP,ITPR3,CASP4,APOBEC1,PTPRN,IRF8,IL18RAP,CXCL13,PTPN22,MLC1,HAVCR2,SLC30A10,PLSCR2,HMGB2,GCLC,MPO,CCL5,SERPINE1,FCGR4,CCL7,CXCL10,SLC5A5,CACNA1A,TRPM2,CD274,PLSCR4,PRKCZ,LEPR,AKAP6,BMP6,CMPK2,SRSF5,CEACAM1,LRP8,ABCG2,EDN1,NOS3,MGST1,PIWIL4,DGAT2,RORB,NCF1,NAMPT,LYN,ABCC1,SPI1,P…
GO:BP	negative regulation of viral process	GO:0048525	1.22282e-06	5.91264	100	699	19	21331	OASL2,ZC3HAV1,BST2,OAS1A,OAS2,IFITM3,ISG15,OASL1,RSAD2,OAS3,IFITM1,CCL5,STAT1,OAS1G,IFITM6,APOBEC3,PLSCR1,MX2,PARP10
GO:BP	cation homeostasis	GO:0055080	1.25597e-06	5.90102	752	699	59	21331	ATP1A2,SCGN,TAC4,ADCYAP1R1,B2M,TRPM1,PTPRC,GRIN1,C3AR1,CCR1,SLC8A1,TSPOAP1,NOS1,CD52,BMP4,CORO1A,ITPR3,KCNJ10,LCK,CXCL13,CAR4,SLC30A10,PTPN6,CCL5,CACNA1B,KNG2,CXCL10,CACNA1A,TRPM2,ATP2A3,GPR4,LPAR6,BCL2,AKAP6,BMP6,GM5127,ACKR2,HTT,FCRL5,EDN1,GPR55,ANK3,HAP1,LYN,CXCR2,ADRB2,TFAP2B,SLC9A2,CP,CAR14,CACNB2,CHD7,ROGDI,PRNP,NMB,CCL2,ADCY5,SLC25A28,PTK2B
GO:BP	regulation of molecular function	GO:0065009	1.37972e-06	5.86021	2940	699	155	21331	ATP1A2,LY6C2,C4B,PPP2R2B,IFIT2,CCL8,CGA,CTSS,PHACTR1,ADCYAP1R1,CCL12,LY6A,OASL2,ACER2,PPP1R1A,B2M,ABCB1A,TRIM30A,OSR1,NAIP5,PRTN3,EPHA5,ZC3HAV1,NPR3,SCG5,BST2,GARNL3,NLRC5,SYK,OAS1A,PTPRC,IRF4,TREM2,GRIN1,OAS2,CARTPT,GREM1,TNFSF10,SPHK1,ARHGAP11A,CYTL1,SPOCK1,NAIP2,TRIM30D,MAPT,VIPR2,IDE,NOS1,OASL1,PSMB8,BMP4,IQGAP2,CRMP1,FGF12,FCGR1,LAX1,OAS3,CYFIP2,ARHGAP45,VAV1,FCER1A,IRAK3,APOBEC1,HP,PLEK,ITG…
GO:BP	leukocyte mediated cytotoxicity	GO:0001909	1.46067e-06	5.83545	101	699	19	21331	B2M,PTPRC,CTSG,IL7R,RAB27A,TAP1,CORO1A,FCGR1,CTSC,VAV1,IL18RAP,HAVCR2,STXBP2,PTPN6,CEACAM1,NCF1,ELANE,CLEC2D,CCL2
GO:BP	myeloid leukocyte mediated immunity	GO:0002444	1.46067e-06	5.83545	101	699	19	21331	PTGDS,TAC4,SYK,CTSG,FCGR1,FCER1A,ITGB2,STXBP2,ANXA3,CD84,FOXF1,STXBP1,RAC2,FGR,FCER1G,C3,NCF1,LYN,ELANE
GO:BP	divalent metal ion transport	GO:0070838	1.65614e-06	5.7809	477	699	44	21331	ATP1A2,ADCYAP1R1,CCL12,TRPM1,PTPRC,GRIN1,CCR1,SLC8A1,CXCL12,NOS1,BMP4,CORO1A,ITPR3,TRPM6,LCK,PTPN22,SLC30A10,PTPN6,TMEM37,CCL5,CACNA1B,CD84,CXCL10,CACNA1A,TRPM2,RAMP1,ATP2A3,HPCA,BCL2,AKAP6,HTT,FCRL5,NOS3,HAP1,LYN,CXCR4,ADRB2,ICAM1,LILRA5,CACNB2,CHD7,PRNP,SARAF,PTK2B
GO:BP	defense response to bacterium	GO:0042742	1.66001e-06	5.77989	442	699	42	21331	IGHM,JCHAIN,IGHA,IGLC1,SCD1,B2M,NPY,NAIP5,SYK,TREM2,CTSG,IGLC2,SPN,IL7R,NAIP2,PRG2,ISG15,FCGR1,GBP8,PGLYRP1,HP,IRF8,PLAC8,CXCL13,HAVCR2,HMGB2,IIGP1,MPO,SERPINE1,ANXA3,TRBC2,IGHD,GBP3,FGR,TNFSF8,FCER1G,NCF1,CLEC4D,ELANE,GBP9,IGHG3,HCK
GO:BP	regulation of leukocyte migration	GO:0002685	1.82857e-06	5.73789	219	699	28	21331	CCL12,CCN3,TREM2,SPN,GREM1,C3AR1,CCR1,CXCL12,PLA2G7,CXCL13,PTPN22,NCKAP1L,PGF,CCL5,SERPINE1,CCL7,CXCL10,RAC2,DPP4,EDN1,LYN,ELANE,CXCR2,ITGA2B,ICAM1,CCL2,F7,PTK2B
GO:BP	metal ion homeostasis	GO:0055065	1.84761e-06	5.73339	682	699	55	21331	ATP1A2,SCGN,TAC4,ADCYAP1R1,B2M,TRPM1,PTPRC,GRIN1,C3AR1,CCR1,SLC8A1,TSPOAP1,NOS1,CD52,BMP4,CORO1A,ITPR3,KCNJ10,LCK,CXCL13,SLC30A10,PTPN6,CCL5,CACNA1B,KNG2,CXCL10,CACNA1A,TRPM2,ATP2A3,GPR4,LPAR6,BCL2,AKAP6,BMP6,GM5127,ACKR2,HTT,FCRL5,EDN1,GPR55,ANK3,HAP1,LYN,CXCR2,ADRB2,TFAP2B,CP,CACNB2,CHD7,PRNP,NMB,CCL2,ADCY5,SLC25A28,PTK2B
GO:BP	anatomical structure morphogenesis	GO:0009653	2.01774e-06	5.69513	2707	699	145	21331	SYT1,ACHE,PRRXL1,CBLN1,SEMA5B,CCL8,SPTBN4,PHACTR1,CCL12,PAPPA2,SP100,ALCAM,TRPM1,SYT4,MAP6,RNF213,OSR1,CCN3,EPHA5,NEBL,CYBB,CNTN4,SYK,SLC1A3,CDH8,MMP12,CD53,TREM2,GRIN1,COL25A1,GREM1,C3AR1,SPHK1,MYOF,IL7R,MTHFD1L,HHIP,FGFBP1,VCAM1,COL13A1,SHTN1,CXCL12,WNT6,MAPT,NRXN3,BMP4,BCAN,CORO1A,TMOD2,CRMP1,CYFIP2,ITGB7,PARVG,DCDC2A,SEMA3D,ITGB2,IFITM1,CCBE1,THBS1,LAMA1,NYAP2,TNFRSF11B,HK2,NCKAP1L,CLIC5,PTPN…
GO:BP	regulation of multicellular organismal development	GO:2000026	2.13824e-06	5.66994	2199	699	124	21331	SYT1,ACHE,CBLN1,SEMA5B,PHACTR1,SP100,B2M,ABCB1A,SYT4,MAP6,OSR1,CYBB,CNTN4,SYK,PTPRC,MMP12,TREM2,GRIN1,OAS2,GPR68,CARTPT,GREM1,C3AR1,SPHK1,PDCD1,CCR1,IL7R,GFAP,SLC8A1,HHIP,SPOCK1,FGFBP1,SHTN1,CXCL12,WNT6,MAPT,NOS1,ISG15,BMP4,CPEB1,CRMP1,IKZF3,CTSC,PGLYRP1,IRAK3,SH3GL3,SEMA3D,ITGB2,LCK,CCBE1,THBS1,LAMA1,TNFRSF11B,HK2,HAVCR2,HMGB2,NCKAP1L,PTPN6,MEGF10,C6,SLC23A2,PGF,FGF7,CCL5,SERPINE1,TUBB2B,ANXA3,S…
GO:BP	regulation of cell migration	GO:0030334	2.42594e-06	5.61512	926	699	67	21331	SEMA5B,PHACTR1,CCL12,SP100,CCN3,BST2,PTPRC,MMP12,TREM2,GRIN1,SPN,GREM1,C3AR1,SPHK1,GPNMB,CCR1,SLC8A1,FGFBP1,SHTN1,CXCL12,BMP4,CORO1A,CPEB1,CRMP1,SEMA3D,IFITM1,PLA2G7,CXCL13,CCBE1,THBS1,LAMA1,PTPN22,NCKAP1L,PGF,FGF7,CCL5,SERPINE1,ANXA3,CCL7,CXCL10,FOXF1,CD274,GPR183,RAC2,FGR,BCL2,CEACAM1,ALOX12,DPP4,EDN1,NOS3,LYN,ABCC1,ELANE,CLDN5,CXCR4,CXCR2,ARHGDIB,ITGA2B,ICAM1,DOCK5,IRS2,SEMA3E,CCL2,F7,ITGAX,PT…
GO:BP	divalent inorganic cation transport	GO:0072511	2.44851e-06	5.6111	483	699	44	21331	ATP1A2,ADCYAP1R1,CCL12,TRPM1,PTPRC,GRIN1,CCR1,SLC8A1,CXCL12,NOS1,BMP4,CORO1A,ITPR3,TRPM6,LCK,PTPN22,SLC30A10,PTPN6,TMEM37,CCL5,CACNA1B,CD84,CXCL10,CACNA1A,TRPM2,RAMP1,ATP2A3,HPCA,BCL2,AKAP6,HTT,FCRL5,NOS3,HAP1,LYN,CXCR4,ADRB2,ICAM1,LILRA5,CACNB2,CHD7,PRNP,SARAF,PTK2B
GO:BP	carboxylic acid transport	GO:0046942	2.66615e-06	5.57412	347	699	36	21331	SLC7A11,SLC6A1,SLC22A6,SLC13A3,SLCO1A4,SLC6A13,SYT4,SLC6A20A,SYK,SLC1A3,SLC2A1,KCNJ10,THBS1,SLC16A11,CYP4F18,SLC23A2,SLC38A5,ABCC4,CACNA1A,STXBP1,LRRC8D,SLC22A2,SLCO2B1,RGS2,CEACAM1,EDN1,SLC7A2,SLC22A3,ABCC1,SLC10A6,PLA2G4A,SLC16A12,IRS2,SLC7A14,NMB,SLC1A5
GO:BP	regulation of cellular component movement	GO:0051270	2.79688e-06	5.55333	1075	699	74	21331	ATP1A2,SEMA5B,PHACTR1,CCL12,SP100,CCN3,BST2,PTPRC,MMP12,TREM2,GRIN1,SPN,GREM1,C3AR1,SPHK1,GPNMB,CCR1,SLC8A1,FGFBP1,SHTN1,CXCL12,MAPT,NOS1,BMP4,CORO1A,CPEB1,CRMP1,SEMA3D,IFITM1,PLA2G7,CXCL13,CCBE1,THBS1,LAMA1,PTPN22,NCKAP1L,PGF,FGF7,CCL5,SERPINE1,TUBB2B,ANXA3,CCL7,CXCL10,FOXF1,CD274,GPR183,RAC2,FGR,BCL2,AKAP6,CEACAM1,ALOX12,DPP4,EDN1,NOS3,HAP1,LYN,ABCC1,ELANE,CLDN5,CXCR4,CXCR2,ARHGDIB,ITGA2B,ICAM1…
GO:BP	import into cell	GO:0098657	2.85441e-06	5.54448	238	699	29	21331	ATP1A2,SLC7A11,SLC6A1,SLC6A2,SLC6A13,SLC6A20A,SLC1A3,TREM2,SLC2A1,GFAP,SLC8A1,NOS1,KCNJ10,THBS1,TRPM2,HPCA,SLC22A2,RGS2,SLC7A2,SLC2A3,HAP1,SLC22A3,ABCC1,ADRB2,MX2,SLC9A2,IRS2,PRNP,SLC1A5
GO:BP	multicellular organismal homeostasis	GO:0048871	2.9688e-06	5.52742	486	699	44	21331	ACHE,ILDR2,CTSS,SGIP1,SCD1,ABCB1A,AQP4,NPR3,SYK,IRF4,SLC2A1,CARTPT,CYTL1,CORO1A,PLAC8,TNFRSF11B,ARRDC3,FGF7,CCL5,FCGR4,SLC28A2,TRPM2,RAC2,LSR,BCL2,LEPR,BMP6,CEACAM1,ALOX12,NOS3,GPR55,NAPSA,PIWIL4,BMP8A,CLDN5,ADRB2,TFAP2B,PLA2G4A,AMPD3,ALDH1A1,INPP5D,IL18R1,CXADR,PTK2B
GO:BP	response to interferon-alpha	GO:0035455	3.04426e-06	5.51652	30	699	11	21331	IFIT1,IFIT2,BST2,IFIT3,IFIT3B,IFITM3,IFI204,IFITM1,IFITM6,TGTP2,PLSCR1
GO:BP	positive regulation of leukocyte migration	GO:0002687	3.23347e-06	5.49033	155	699	23	21331	CCL12,TREM2,SPN,C3AR1,CCR1,CXCL12,PLA2G7,CXCL13,NCKAP1L,PGF,CCL5,SERPINE1,CCL7,CXCL10,RAC2,EDN1,ELANE,CXCR2,ITGA2B,ICAM1,CCL2,F7,PTK2B
GO:BP	neutrophil migration	GO:1990266	3.45845e-06	5.46112	130	699	21	21331	CCL8,CCL12,PRTN3,SYK,C3AR1,VAV1,ITGB2,CXCL13,NCKAP1L,CCL5,CCL7,CXCL10,RAC2,JAML,FCER1G,DPP4,EDN1,CXCR2,CSF3R,CXADR,CCL2
GO:BP	positive regulation of regulated secretory pathway	GO:1903307	3.79424e-06	5.42087	64	699	15	21331	SYT1,SYT4,CADPS,SYK,RAB27A,FCER1A,ITGB2,STXBP2,CACNA1B,SYT10,STXBP1,FGR,FCER1G,CACNB2,SYT7
GO:BP	cellular metal ion homeostasis	GO:0006875	4.19692e-06	5.37707	602	699	50	21331	ATP1A2,SCGN,TAC4,ADCYAP1R1,TRPM1,PTPRC,GRIN1,C3AR1,CCR1,SLC8A1,TSPOAP1,NOS1,CD52,BMP4,CORO1A,ITPR3,LCK,CXCL13,SLC30A10,PTPN6,CCL5,CACNA1B,KNG2,CXCL10,CACNA1A,TRPM2,ATP2A3,GPR4,LPAR6,BCL2,AKAP6,BMP6,GM5127,ACKR2,HTT,FCRL5,EDN1,GPR55,HAP1,LYN,CXCR2,ADRB2,CP,CACNB2,CHD7,PRNP,NMB,CCL2,ADCY5,PTK2B
GO:BP	cellular ion homeostasis	GO:0006873	4.57834e-06	5.33929	680	699	54	21331	ATP1A2,SCGN,TAC4,ADCYAP1R1,TRPM1,PTPRC,GRIN1,C3AR1,CCR1,SLC8A1,TSPOAP1,NOS1,CD52,BMP4,CORO1A,ITPR3,LCK,CXCL13,SLC30A10,PTPN6,CCL5,CACNA1B,KNG2,CXCL10,CACNA1A,TRPM2,ATP2A3,GPR4,LPAR6,BCL2,AKAP6,BMP6,GM5127,ACKR2,HTT,FCRL5,EDN1,GPR55,HAP1,LYN,CXCR2,ADRB2,TFAP2B,SLC9A2,CP,CACNB2,CHD7,ROGDI,PRNP,NMB,ENPP1,CCL2,ADCY5,PTK2B
GO:BP	regulation of neurotransmitter levels	GO:0001505	4.60722e-06	5.33656	228	699	28	21331	ATP1A2,SYT1,ACHE,SLC6A1,DOC2A,SLC6A2,SYT4,CADPS,SPHK1,GFAP,NOS1,NRXN3,KCNJ10,STXBP2,CACNA1B,SYT10,PDE1B,CACNA1A,STXBP1,SLC22A2,SLC22A3,SYT5,ADRB2,ADCY1,SYN2,CACNB2,SYT7,SNCG
GO:BP	blood vessel morphogenesis	GO:0048514	4.69361e-06	5.32849	642	699	52	21331	CCL12,SP100,RNF213,CCN3,CYBB,SYK,GREM1,C3AR1,SPHK1,HHIP,FGFBP1,CXCL12,NRXN3,BMP4,ITGB2,CCBE1,THBS1,LAMA1,HK2,C6,PGF,CCL5,SERPINE1,ANXA3,STAT1,CXCL10,FOXF1,RAMP1,GPR4,LEPR,PROK2,CEACAM1,MYO18B,EDN1,NOS3,NRCAM,C3,SPI1,CLDN5,CXCR4,CXCR2,ADRB2,TFAP2B,SOX17,HPSE,KLF5,SEMA3E,CHD7,CCL2,NDNF,ITGAX,PTK2B
GO:BP	regulation of phagocytosis	GO:0050764	4.76916e-06	5.32156	108	699	19	21331	PRTN3,SYK,PTPRC,TREM2,SPHK1,RAB27A,FCGR1,NCKAP1L,FGR,IL2RG,FCER1G,C3,DOCK2,CD300LF,SIRPB1C,ABCA7,CCL2,SYT7,HCK
GO:BP	positive regulation of cell-cell adhesion	GO:0022409	5.48862e-06	5.26054	260	699	30	21331	SYK,PTPRC,SPN,CD6,IL7R,CD5,VCAM1,CORO1A,LCK,CXCL13,PTPN22,HAVCR2,NCKAP1L,ICOSL,MEGF10,CCL5,ITGAL,CD274,PRKCZ,CD3E,IL2RG,DPP4,ANK3,ELANE,RASAL3,ICAM1,NFKBIZ,SIRPB1C,IL12RB1,CCL2
GO:BP	cellular cation homeostasis	GO:0030003	6.04086e-06	5.2189	666	699	53	21331	ATP1A2,SCGN,TAC4,ADCYAP1R1,TRPM1,PTPRC,GRIN1,C3AR1,CCR1,SLC8A1,TSPOAP1,NOS1,CD52,BMP4,CORO1A,ITPR3,LCK,CXCL13,SLC30A10,PTPN6,CCL5,CACNA1B,KNG2,CXCL10,CACNA1A,TRPM2,ATP2A3,GPR4,LPAR6,BCL2,AKAP6,BMP6,GM5127,ACKR2,HTT,FCRL5,EDN1,GPR55,HAP1,LYN,CXCR2,ADRB2,TFAP2B,SLC9A2,CP,CACNB2,CHD7,ROGDI,PRNP,NMB,CCL2,ADCY5,PTK2B
GO:BP	granulocyte chemotaxis	GO:0071621	7.00431e-06	5.15463	135	699	21	21331	CCL8,CCL12,SYK,C3AR1,VAV1,ITGB2,CXCL13,NCKAP1L,CCL5,CCL7,CXCL10,IL17RA,RAC2,JAML,FCER1G,DPP4,EDN1,CXCR2,CSF3R,CXADR,CCL2
GO:BP	T cell differentiation	GO:0030217	7.20543e-06	5.14234	263	699	30	21331	B2M,CD8A,SYK,PTPRC,IRF4,SPN,IL7R,CD3G,BMP4,RSAD2,VAV1,LCK,PTPN22,NCKAP1L,LY9,GPR183,PRKCZ,BCL2,LEPR,TNFSF8,CD3E,IL2RG,FCER1G,LFNG,CLEC4D,DOCK2,NFKBIZ,IL18R1,CHD7,LMBR1L
GO:BP	positive regulation of leukocyte cell-cell adhesion	GO:1903039	7.41881e-06	5.12967	218	699	27	21331	SYK,PTPRC,SPN,CD6,IL7R,CD5,VCAM1,CORO1A,LCK,PTPN22,HAVCR2,NCKAP1L,ICOSL,CCL5,ITGAL,CD274,PRKCZ,CD3E,IL2RG,DPP4,ELANE,RASAL3,ICAM1,NFKBIZ,SIRPB1C,IL12RB1,CCL2
GO:BP	regulation of exocytosis	GO:0017157	8.29725e-06	5.08107	234	699	28	21331	SYT1,DOC2A,SYT4,CADPS,SYK,RAB27A,NRXN3,FCER1A,ITGB2,STXBP2,CACNA1B,CD84,SYT10,FOXF1,CACNA1A,STXBP1,RAC2,FGR,CEACAM1,FCER1G,HAP1,LYN,SYT5,ADRB2,ADCY1,CACNB2,SYTL4,SYT7
GO:BP	regulation of cell motility	GO:2000145	8.88945e-06	5.05113	977	699	68	21331	SEMA5B,PHACTR1,CCL12,SP100,CCN3,BST2,PTPRC,MMP12,TREM2,GRIN1,SPN,GREM1,C3AR1,SPHK1,GPNMB,CCR1,SLC8A1,FGFBP1,SHTN1,CXCL12,BMP4,CORO1A,CPEB1,CRMP1,SEMA3D,IFITM1,PLA2G7,CXCL13,CCBE1,THBS1,LAMA1,PTPN22,NCKAP1L,PGF,FGF7,CCL5,SERPINE1,ANXA3,CCL7,CXCL10,FOXF1,CD274,GPR183,RAC2,FGR,BCL2,CEACAM1,ALOX12,DPP4,EDN1,NOS3,LYN,ABCC1,ELANE,CLDN5,CXCR4,CXCR2,ARHGDIB,ITGA2B,ICAM1,DOCK5,CTNNA1,IRS2,SEMA3E,CCL2,F7,I…
GO:BP	cell adhesion mediated by integrin	GO:0033627	9.34386e-06	5.02947	68	699	15	21331	ACER2,CCN3,SYK,ITGB7,CXCL13,NCKAP1L,PTPN6,CCL5,SERPINE1,CD3E,DPP4,LYN,ICAM1,ITGB2L,LPXN
GO:BP	angiogenesis	GO:0001525	9.72889e-06	5.01194	542	699	46	21331	CCL12,SP100,RNF213,CCN3,CYBB,SYK,GREM1,C3AR1,SPHK1,HHIP,FGFBP1,CXCL12,NRXN3,BMP4,ITGB2,CCBE1,THBS1,HK2,C6,PGF,CCL5,SERPINE1,ANXA3,STAT1,CXCL10,RAMP1,GPR4,LEPR,PROK2,CEACAM1,EDN1,NOS3,NRCAM,C3,CLDN5,CXCR4,CXCR2,ADRB2,SOX17,HPSE,KLF5,SEMA3E,CCL2,NDNF,ITGAX,PTK2B
GO:BP	viral genome replication	GO:0019079	1.04626e-05	4.98036	113	699	19	21331	OASL2,ZC3HAV1,BST2,OAS1A,OAS2,IFITM3,ISG15,OASL1,RSAD2,OAS3,IFITM1,CCL5,OAS1G,IFITM6,BCL2,APOBEC3,PLSCR1,MX2,PARP10
GO:BP	regulation of locomotion	GO:0040012	1.08502e-05	4.96456	1024	699	70	21331	SEMA5B,PHACTR1,CCL12,SP100,CCN3,BST2,PTPRC,MMP12,TREM2,GRIN1,SPN,GREM1,C3AR1,SPHK1,GPNMB,CCR1,SLC8A1,FGFBP1,SHTN1,CXCL12,BMP4,CORO1A,CPEB1,CRMP1,SEMA3D,IFITM1,PLA2G7,CXCL13,CCBE1,THBS1,LAMA1,PTPN22,NCKAP1L,ARRDC3,PGF,FGF7,CCL5,SERPINE1,TUBB2B,ANXA3,CCL7,CXCL10,FOXF1,CD274,GPR183,RAC2,FGR,BCL2,CEACAM1,ALOX12,DPP4,EDN1,NOS3,LYN,ABCC1,ELANE,CLDN5,CXCR4,CXCR2,ARHGDIB,ITGA2B,ICAM1,DOCK5,CTNNA1,IRS2,SE…
GO:BP	cellular homeostasis	GO:0019725	1.23512e-05	4.90829	985	699	68	21331	ATP1A2,SCGN,TAC4,ADCYAP1R1,TRPM1,AQP4,EPHA5,PTPRC,GRIN1,GPR68,CARTPT,C3AR1,CCR1,SLC8A1,VCAM1,TSPOAP1,IDE,NOS1,CD52,BMP4,CORO1A,ITPR3,PTPRN,LCK,CXCL13,HK2,SLC30A10,GCLC,PTPN6,CCL5,CACNA1B,KNG2,CXCL10,CACNA1A,TRPM2,ATP2A3,GPR4,LPAR6,BCL2,LEPR,AKAP6,BMP6,GM5127,ACKR2,HTT,FCRL5,EDN1,GPR55,PIWIL4,DGAT2,HAP1,LYN,CXCR2,ADRB2,TFAP2B,ICAM1,SLC9A2,CP,IRS2,CACNB2,CHD7,ROGDI,PRNP,NMB,ENPP1,CCL2,ADCY5,PTK2B
GO:BP	myeloid cell activation involved in immune response	GO:0002275	1.54489e-05	4.8111	92	699	17	21331	PTGDS,TAC4,SYK,TREM2,FCER1A,ITGB2,HAVCR2,STXBP2,ANXA3,CD84,FOXF1,STXBP1,RAC2,FGR,FCER1G,LYN,DOCK2
GO:BP	negative regulation of immune response	GO:0050777	1.71266e-05	4.76633	155	699	22	21331	BST2,NLRC5,PTPRC,MMP12,SAMSN1,SPN,PDCD1,CCR1,IL7R,TAP1,VSIG4,DHX58,PGLYRP1,IRAK3,HAVCR2,PTPN6,CD84,FOXF1,CEACAM1,PARP14,CLEC2D,INPP5D
GO:BP	modulation of chemical synaptic transmission	GO:0050804	1.93183e-05	4.71403	480	699	42	21331	SYT1,SCGN,CBLN1,SLC7A11,SLC6A1,SYT4,SLC1A3,GRIN1,SPHK1,GUCY1B1,GFAP,PHF24,GRIA4,MAPT,NOS1,NRXN3,CPEB1,ITPR3,KCNJ10,CACNA1B,TUBB2B,PIRB,BEGAIN,CACNA1A,STXBP1,PRKCZ,LRP8,EDN1,SHISA9,HAP1,TNR,ADRB2,BCHE,ADCY1,RIN1,CACNB2,PRNP,GRIK3,CCL2,SYT7,PTK2B,SNCG
GO:BP	symbiotic process	GO:0044403	1.93819e-05	4.7126	391	699	37	21331	OASL2,TRIM30A,NAIP5,ZC3HAV1,BST2,OAS1A,CTSG,OAS2,IFITM3,ZBP1,VCAM1,TRIM30D,ISG15,OASL1,RSAD2,OAS3,PGLYRP1,IFITM1,CCL5,STAT1,OAS1G,IFITM6,GBP3,BCL2,CEACAM1,DPP4,NCF1,APOBEC3,ELANE,CD300LF,CXCR4,PLSCR1,MX2,ICAM1,GBP9,PARP10,IRGM1
GO:BP	cellular response to interferon-gamma	GO:0071346	2.01815e-05	4.69505	130	699	20	21331	CCL8,CCL12,ASS1,AQP4,NLRC5,GBP8,IRF8,STXBP2,CCL5,CCL7,STAT1,STXBP1,GBP3,EDN1,PARP14,GBP5,GBP9,IL12RB1,CCL2,IRGM1
GO:BP	regulation of trans-synaptic signaling	GO:0099177	2.05225e-05	4.68777	481	699	42	21331	SYT1,SCGN,CBLN1,SLC7A11,SLC6A1,SYT4,SLC1A3,GRIN1,SPHK1,GUCY1B1,GFAP,PHF24,GRIA4,MAPT,NOS1,NRXN3,CPEB1,ITPR3,KCNJ10,CACNA1B,TUBB2B,PIRB,BEGAIN,CACNA1A,STXBP1,PRKCZ,LRP8,EDN1,SHISA9,HAP1,TNR,ADRB2,BCHE,ADCY1,RIN1,CACNB2,PRNP,GRIK3,CCL2,SYT7,PTK2B,SNCG
GO:BP	positive regulation of T cell activation	GO:0050870	2.11592e-05	4.6745	199	699	25	21331	SYK,PTPRC,SPN,CD6,IL7R,CD5,VCAM1,CORO1A,LCK,PTPN22,HAVCR2,NCKAP1L,ICOSL,CCL5,ITGAL,CD274,PRKCZ,CD3E,IL2RG,DPP4,RASAL3,NFKBIZ,SIRPB1C,IL12RB1,CCL2
GO:BP	mast cell activation	GO:0045576	2.155e-05	4.66655	72	699	15	21331	PTGDS,TAC4,SYK,FCER1A,STXBP2,CD84,LCP2,FOXF1,STXBP1,RAC2,FGR,FCER1G,LYN,CD300LF,PLSCR1
GO:BP	positive regulation of immune effector process	GO:0002699	2.17103e-05	4.66333	229	699	27	21331	B2M,ZC3HAV1,SYK,PTPRC,DHX58,FCGR1,RSAD2,VAV1,FCER1A,ITGB2,IL18RAP,PTPN22,STXBP2,C6,CD84,CD37,FOXF1,STXBP1,RAC2,PRKCZ,FGR,FCER1G,C3,LYN,NFKBIZ,IL18R1,CCL2
GO:BP	immune response-regulating cell surface receptor signaling pathway	GO:0002768	2.24776e-05	4.64825	325	699	33	21331	IGHA,IGLC1,CD22,SYK,PTPRC,IGLC2,SPN,C3AR1,FCGR1,LAX1,CD79A,FCER1A,LCK,PTPN22,NCKAP1L,ICOSL,PTPN6,FCGR4,TRBC2,IGHD,LCP2,BCL2,CD3E,CEACAM1,FCER1G,FCRL5,LYN,CLEC4D,PLSCR1,NFKBIZ,IGHG3,PRNP,LPXN
GO:BP	regulation of monocyte chemotaxis	GO:0090025	2.34105e-05	4.63059	28	699	10	21331	CCN3,GREM1,CCR1,CXCL12,PLA2G7,CCL5,SERPINE1,CXCL10,LYN,CCL2
GO:BP	positive regulation of developmental process	GO:0051094	2.56616e-05	4.59072	1557	699	93	21331	SYT1,ACHE,CBLN1,CCL8,SPTBN4,SGIP1,B2M,ABCB1A,SYT4,MAP6,OSR1,CYBB,SYK,PTPRC,CD53,TREM2,GRIN1,GPR68,GREM1,C3AR1,SPHK1,CCR1,IL7R,GFAP,SLC8A1,FGFBP1,SHTN1,CXCL12,WNT6,MAPT,ISG15,BMP4,CPEB1,IFI204,IRAK3,SH3GL3,ITGB2,IFITM1,LCK,CCBE1,THBS1,HK2,HMGB2,NCKAP1L,C6,SLC23A2,PGF,FGF7,CCL5,SERPINE1,TUBB2B,ANXA3,STAT1,CD274,PRKCZ,BCL2,CPNE9,AKAP6,BMP6,CD3E,RGS2,IL2RG,CEACAM1,ALOX12,LRP8,EDN1,NOS3,GDPD2,ASIC2,C3…
GO:BP	cellular response to lipopolysaccharide	GO:0071222	2.61868e-05	4.58192	231	699	27	21331	CCL12,ASS1,B2M,TREM2,CTSG,CD6,SGMS1,CPEB1,IRF8,CXCL13,PTPN22,HAVCR2,PLSCR2,HMGB2,CCL5,SERPINE1,FCGR4,CXCL10,CD274,PLSCR4,BMP6,CMPK2,NOS3,LYN,PLSCR1,CD14,CCL2
GO:BP	immune response-regulating signaling pathway	GO:0002764	2.81897e-05	4.54991	328	699	33	21331	IGHA,IGLC1,CD22,SYK,PTPRC,IGLC2,SPN,C3AR1,FCGR1,LAX1,CD79A,FCER1A,LCK,PTPN22,NCKAP1L,ICOSL,PTPN6,FCGR4,TRBC2,IGHD,LCP2,BCL2,CD3E,CEACAM1,FCER1G,FCRL5,LYN,CLEC4D,PLSCR1,NFKBIZ,IGHG3,PRNP,LPXN
GO:BP	granulocyte migration	GO:0097530	3.10831e-05	4.50748	160	699	22	21331	CCL8,CCL12,PRTN3,SYK,C3AR1,VAV1,ITGB2,CXCL13,NCKAP1L,CCL5,CCL7,CXCL10,IL17RA,RAC2,JAML,FCER1G,DPP4,EDN1,CXCR2,CSF3R,CXADR,CCL2
GO:BP	negative regulation of cell activation	GO:0050866	3.17754e-05	4.49791	203	699	25	21331	SAMSN1,SPN,GPNMB,SLFN1,VSIG4,BMP4,LAX1,PGLYRP1,PTPN22,HAVCR2,GCLC,PTPN6,CD84,CD37,FOXF1,CD274,FGR,CEACAM1,ALOX12,LYN,CD300LF,ADRB2,INPP5D,PDE5A,PRNP
GO:BP	positive regulation of cell population proliferation	GO:0008284	3.24338e-05	4.489	1052	699	70	21331	ACER2,OSR1,SYK,PTPRC,MMP12,SPN,GREM1,CD6,C3AR1,SPHK1,IL7R,GFAP,FGFBP1,VCAM1,CXCL12,BMP4,CORO1A,PTPRN,PLAC8,THBS1,PTPN22,HAVCR2,HMGB2,NCKAP1L,ICOSL,PTPN6,MEGF10,PGF,FGF7,CCL5,ITGAL,IGHD,CXCL10,ABCC4,FOXF1,CD274,GPR183,RAC2,PRKCZ,JAML,BCL2,BMP6,PROK2,CD3E,ALOX12,DPP4,EDN1,NAMPT,LYN,ELANE,CLDN5,CXCR2,ADRB2,RASAL3,TFAP2B,PLA2G4A,CLU,HPSE,CRLF1,KLF5,IRS2,CXADR,ROGDI,IL12RB1,NMB,CCL2,NUDT16,ITGAX,PTK2B…
GO:BP	monoamine transport	GO:0015844	3.55519e-05	4.44914	97	699	17	21331	SYT1,SLC6A2,SYT4,CADPS,SYK,CARTPT,CXCL12,NOS1,FCER1A,SYT10,SLC22A2,FCER1G,SLC22A3,SYT5,SYT7,ENTPD1,SNCG
GO:BP	positive regulation of lymphocyte proliferation	GO:0050671	3.91068e-05	4.40775	135	699	20	21331	SYK,PTPRC,SPN,CD6,VCAM1,CORO1A,PTPN22,HAVCR2,NCKAP1L,ICOSL,CCL5,ITGAL,IGHD,CD274,GPR183,BCL2,CD3E,RASAL3,IRS2,IL12RB1
GO:BP	regulation of anatomical structure morphogenesis	GO:0022603	4.18587e-05	4.37821	1102	699	72	21331	SYT1,ACHE,SEMA5B,CCL8,CCL12,SP100,SYT4,MAP6,OSR1,CYBB,CD53,TREM2,GRIN1,GREM1,C3AR1,SPHK1,HHIP,FGFBP1,SHTN1,CXCL12,WNT6,MAPT,BMP4,CORO1A,SEMA3D,ITGB2,CCBE1,THBS1,TNFRSF11B,HK2,C6,SLC23A2,PGF,FGF7,CCL5,SERPINE1,TUBB2B,ANXA3,CCL7,STAT1,CXCL10,CACNA1A,RAC2,GPR4,FGR,BCL2,CPNE9,PROK2,CEACAM1,ALOX12,LRP8,EDN1,NOS3,C3,LFNG,WNT9B,CLDN5,TLX2,TNR,CXCR4,CXCR2,ADRB2,STAT2,ICAM1,DOCK5,DIXDC1,SEMA3E,RHOU,CCL2,I…
GO:BP	cell death	GO:0008219	4.5267e-05	4.34422	2168	699	118	21331	ACHE,PPP2R2B,SLC7A11,IFIT2,ADCYAP1R1,CCL12,ACER2,SP100,SLC6A13,ABCB1A,SP110,ALDOC,IFI27L2A,OSR1,NAIP5,CCN3,IFIT3,SYK,PTPRC,TREM2,GRIN1,SPN,GREM1,TNFSF10,SPHK1,CASP7,GPNMB,PDCD1,IL7R,ZBP1,HHIP,CD5,CXCL12,NAIP2,PDE1A,MAPT,CD3G,NOS1,SGMS1,BMP4,CORO1A,IER3,IFI204,CASP4,CYFIP2,IKZF3,CTSC,PGLYRP1,LDHA,IRAK3,C1QA,HP,PLAC8,LCK,THBS1,TNFRSF11B,HK2,SLC30A10,PLSCR2,HMGB2,NCKAP1L,GCLC,MEGF10,XAF1,C6,MLKL,SLC…
GO:BP	positive regulation of leukocyte proliferation	GO:0070665	4.79743e-05	4.31899	150	699	21	21331	SYK,PTPRC,SPN,CD6,VCAM1,CORO1A,PTPN22,HAVCR2,NCKAP1L,ICOSL,CCL5,ITGAL,IGHD,CD274,GPR183,BCL2,CD3E,LYN,RASAL3,IRS2,IL12RB1
GO:BP	response to drug	GO:0042493	4.82146e-05	4.31682	477	699	41	21331	ADCYAP1R1,SLCO1A4,ACER2,ASS1,B2M,SLC6A2,ABCB1A,CYBB,SLC1A3,ADSSL1,SLC8A1,NOS1,LDHA,APOBEC1,LCK,THBS1,TNFRSF11B,NCKAP1L,PGF,ABCC4,CYP2E1,BCL2,ABCB1B,UCHL1,LRP8,EDN1,MGST1,ASIC2,LYN,ABCC1,CXCR4,TFAP2B,BCHE,ALDH1A1,CBX7,ADCY1,AIM2,PRNP,CCL2,F7,PTK2B
GO:BP	regulation of biological process	GO:0050789	4.88607e-05	4.31104	12749	699	487	21331	ATP1A2,SYT1,SCGN,JCHAIN,GPR158,LY6C2,IGHA,IGLC1,ACHE,C4B,PRRXL1,PTGDS,CBLN1,SEMA5B,PPP2R2B,SLC7A11,IFIT2,CCL8,SLC6A1,CGA,SPTBN4,CTSS,PHACTR1,SGIP1,TAC4,GABRD,CD22,SCD1,ADCYAP1R1,CCL12,IRF7,RGR,POU2AF1,LY6A,OASL2,IFI211,IFI213,SLCO1A4,ACER2,ASS1,PPP1R1A,SP100,DOC2A,B2M,DPP6,SLC6A13,TRPM1,CD8A,ABCB1A,SYT4,NNAT,TRIM30A,SP110,MAP6,CADPS,RNF213,NPY,IFI27L2A,OSR1,NAIP5,PRTN3,AQP4,CCN3,EPHA5,ZC3HAV1,NPR…
GO:BP	cellular response to molecule of bacterial origin	GO:0071219	4.95861e-05	4.30464	238	699	27	21331	CCL12,ASS1,B2M,TREM2,CTSG,CD6,SGMS1,CPEB1,IRF8,CXCL13,PTPN22,HAVCR2,PLSCR2,HMGB2,CCL5,SERPINE1,FCGR4,CXCL10,CD274,PLSCR4,BMP6,CMPK2,NOS3,LYN,PLSCR1,CD14,CCL2
GO:BP	positive regulation of mononuclear cell proliferation	GO:0032946	5.04925e-05	4.29677	137	699	20	21331	SYK,PTPRC,SPN,CD6,VCAM1,CORO1A,PTPN22,HAVCR2,NCKAP1L,ICOSL,CCL5,ITGAL,IGHD,CD274,GPR183,BCL2,CD3E,RASAL3,IRS2,IL12RB1
GO:BP	response to lipopolysaccharide	GO:0032496	5.68057e-05	4.24561	372	699	35	21331	CCL12,ASS1,B2M,TREM2,CTSG,CD6,VCAM1,NOS1,SGMS1,CPEB1,IRAK3,IRF8,CXCL13,PTPN22,HAVCR2,PLSCR2,HMGB2,MPO,CCL5,SERPINE1,FCGR4,CXCL10,CD274,PLSCR4,BMP6,CMPK2,ABCG2,EDN1,NOS3,MGST1,LYN,ELANE,PLSCR1,CD14,CCL2
GO:BP	regulation of intracellular signal transduction	GO:1902531	6.37067e-05	4.19581	1610	699	94	21331	CCL8,ADCYAP1R1,CCL12,CD8A,TRIM30A,CCN3,ZC3HAV1,GARNL3,SYK,PTPRC,TREM2,CARTPT,GREM1,TNFSF10,SPHK1,GPNMB,CCR1,CXCL12,TRIM30D,MAPT,NOS1,BMP4,EPS8L1,DHX58,LAX1,TLR7,DGKD,FCER1A,IRAK3,LCK,THBS1,PTPN22,HAVCR2,SLC30A10,SEZ6L,ARRDC3,PTPN6,MLKL,CHD5,CCL5,MAP3K8,PDE10A,ITGAL,ALPK1,CCL7,STAT1,CBS,CYTH4,GPR183,GPR4,PRKCZ,FGR,LPAR6,BCL2,LEPR,AKAP6,PROK2,GM5127,UCHL1,CD3E,RGS2,F10,CEACAM1,HTT,EDN1,GPR55,TLR13,…
GO:BP	response to metal ion	GO:0010038	7.13437e-05	4.14664	393	699	36	21331	SYT1,SLC6A1,ASS1,B2M,SYT4,CYBB,VCAM1,MAPT,ITPR3,APOBEC1,C1QA,LCK,THBS1,TNFRSF11B,SLC30A10,CPNE7,GCLC,SYT10,TRPM2,HPCA,BCL2,BMP6,ABCG2,EDN1,ANK3,NCF1,SYT5,AANAT,PLA2G4A,CD14,CP,ADCY1,PRNP,KCNMB2,SYT7,PTK2B
GO:BP	regulation of body fluid levels	GO:0050878	7.65919e-05	4.11582	359	699	34	21331	SLC7A11,TAC4,SCD1,AQP4,NPR3,SYK,OAS2,RAB27A,PLEK,TSPAN8,THBS1,HK2,PTPN6,SERPINE1,KNG2,TREML1,STXBP1,MMRN1,LSR,F10,CEACAM1,FCER1G,ALOX12,EDN1,C3,LYN,ADRB2,TFAP2B,ITGA2B,PLA2G4A,HPSE,VWF,F7,ENTPD1
GO:BP	regulation of viral life cycle	GO:1903900	7.6747e-05	4.11494	154	699	21	21331	OASL2,TRIM30A,ZC3HAV1,BST2,OAS1A,OAS2,IFITM3,TRIM30D,ISG15,OASL1,RSAD2,OAS3,IFITM1,CCL5,OAS1G,IFITM6,BCL2,APOBEC3,PLSCR1,MX2,PARP10
GO:BP	positive regulation of chemotaxis	GO:0050921	7.6747e-05	4.11494	154	699	21	21331	TREM2,C3AR1,CCR1,CXCL12,PLA2G7,CXCL13,THBS1,NCKAP1L,PGF,CCL5,SERPINE1,TUBB2B,CCL7,CXCL10,RAC2,EDN1,CXCR4,CXCR2,CCL2,F7,PTK2B
GO:BP	calcium ion transport into cytosol	GO:0060402	8.54803e-05	4.06813	169	699	22	21331	ADCYAP1R1,TRPM1,PTPRC,GRIN1,SLC8A1,BMP4,CORO1A,ITPR3,LCK,PTPN6,CXCL10,TRPM2,BCL2,AKAP6,HTT,FCRL5,HAP1,LYN,ADRB2,CHD7,PRNP,PTK2B
GO:BP	positive regulation of leukocyte chemotaxis	GO:0002690	9.00305e-05	4.04561	103	699	17	21331	C3AR1,CCR1,CXCL12,PLA2G7,CXCL13,NCKAP1L,PGF,CCL5,SERPINE1,CCL7,CXCL10,RAC2,EDN1,CXCR2,CCL2,F7,PTK2B
GO:BP	calcium-mediated signaling	GO:0019722	9.1974e-05	4.03633	214	699	25	21331	CD8A,SYK,PTPRC,TREM2,GRIN1,SPHK1,CCR1,SLC8A1,VCAM1,MAPT,FCER1A,ITGAL,TREML1,TRPM2,HPCA,AKAP6,ACKR2,CD3E,HTT,EDN1,HAP1,CXCR4,CXCR2,PRNP,PTK2B
GO:BP	positive regulation of ion transport	GO:0043270	0.000104321	3.98163	329	699	32	21331	SYT1,SLC6A1,CTSS,ADCYAP1R1,CCL12,DPP6,ABCB1A,SYT4,TREM2,GRIN1,CCR1,CXCL12,NOS1,BMP4,FGF12,CYP4F18,CCL5,CXCL10,STXBP1,AKAP6,HTT,EDN1,ASIC2,ANK3,HAP1,ADRB2,PLA2G4A,SCN3B,LILRA5,CACNB2,ABCA7,CCL2
GO:BP	cellular response to biotic stimulus	GO:0071216	0.000117447	3.93016	264	699	28	21331	CCL12,ASS1,B2M,SYK,TREM2,CTSG,CD6,SGMS1,CPEB1,IRF8,CXCL13,PTPN22,HAVCR2,PLSCR2,HMGB2,CCL5,SERPINE1,FCGR4,CXCL10,CD274,PLSCR4,BMP6,CMPK2,NOS3,LYN,PLSCR1,CD14,CCL2
GO:BP	carboxylic acid transmembrane transport	GO:1905039	0.000118892	3.92485	144	699	20	21331	SLC7A11,SLC13A3,SLC6A13,SLC6A20A,SLC1A3,SLC2A1,KCNJ10,THBS1,SLC16A11,SLC23A2,SLC38A5,LRRC8D,SLC22A2,RGS2,SLC7A2,ABCC1,SLC16A12,IRS2,SLC7A14,SLC1A5
GO:BP	activation of innate immune response	GO:0002218	0.000126727	3.89713	41	699	11	21331	IFI211,IFI213,ZBP1,IFI207,IFI204,MNDAL,IFI203,IFI209,IFI206,IFI208,AIM2
GO:BP	organic acid transmembrane transport	GO:1903825	0.000133751	3.8737	145	699	20	21331	SLC7A11,SLC13A3,SLC6A13,SLC6A20A,SLC1A3,SLC2A1,KCNJ10,THBS1,SLC16A11,SLC23A2,SLC38A5,LRRC8D,SLC22A2,RGS2,SLC7A2,ABCC1,SLC16A12,IRS2,SLC7A14,SLC1A5
GO:BP	positive regulation of cell adhesion	GO:0045785	0.000134484	3.87133	421	699	37	21331	SYK,PTPRC,SPN,CD6,IL7R,CD5,VCAM1,CXCL12,CORO1A,VAV1,LCK,CXCL13,PTPN22,HAVCR2,NCKAP1L,ICOSL,PTPN6,MEGF10,CCL5,ITGAL,FOXF1,CD274,PRKCZ,CD3E,IL2RG,DPP4,ANK3,ELANE,RASAL3,ICAM1,NFKBIZ,DOCK5,SIRPB1C,IL12RB1,CCL2,NDNF,PTK2B
GO:BP	cytosolic calcium ion transport	GO:0060401	0.00013591	3.86675	188	699	23	21331	ADCYAP1R1,TRPM1,PTPRC,GRIN1,SLC8A1,BMP4,CORO1A,ITPR3,LCK,PTPN6,CXCL10,TRPM2,ATP2A3,BCL2,AKAP6,HTT,FCRL5,HAP1,LYN,ADRB2,CHD7,PRNP,PTK2B
GO:BP	xenobiotic transport	GO:0042908	0.000142345	3.84666	33	699	10	21331	SLC6A13,ABCB1A,SLC2A1,ABCC4,LRRC8D,ABCB1B,SLC22A2,ABCG2,SLC22A3,ABCC1
GO:BP	import across plasma membrane	GO:0098739	0.000150665	3.82199	160	699	21	21331	ATP1A2,SLC7A11,SLC6A1,SLC6A13,SLC6A20A,SLC1A3,SLC2A1,SLC8A1,KCNJ10,THBS1,TRPM2,SLC22A2,RGS2,SLC7A2,SLC2A3,ABCC1,ADRB2,SLC9A2,IRS2,PRNP,SLC1A5
GO:BP	regulation of leukocyte degranulation	GO:0043300	0.000155944	3.80703	51	699	12	21331	SYK,FCER1A,ITGB2,STXBP2,CD84,FOXF1,STXBP1,RAC2,FGR,CEACAM1,FCER1G,LYN
GO:BP	regulation of mast cell activation	GO:0033003	0.000155944	3.80703	51	699	12	21331	SYK,FCER1A,STXBP2,CD84,FOXF1,STXBP1,RAC2,FGR,FCER1G,LYN,CD300LF,PLSCR1
GO:BP	response to type I interferon	GO:0034340	0.000155944	3.80703	51	699	12	21331	IRF7,NLRC5,MMP12,OAS2,IFITM3,ZBP1,ISG15,IFITM1,STAT1,IFITM6,MX2,STAT2
GO:BP	response to inorganic substance	GO:0010035	0.000160301	3.79506	614	699	47	21331	SYT1,SLC6A1,ASS1,B2M,SYT4,CYBB,SLC1A3,SPHK1,GUCY1B1,SLC8A1,VCAM1,MAPT,ITPR3,LDHA,APOBEC1,C1QA,HP,IL18RAP,LCK,THBS1,TNFRSF11B,SLC30A10,CPNE7,GCLC,MPO,SYT10,LRP11,TRPM2,CYP2E1,HPCA,BCL2,BMP6,ABCG2,EDN1,NOS3,ANK3,NCF1,SYT5,AANAT,PLA2G4A,CD14,CP,ADCY1,PRNP,KCNMB2,SYT7,PTK2B
GO:BP	response to molecule of bacterial origin	GO:0002237	0.00016227	3.78976	388	699	35	21331	CCL12,ASS1,B2M,TREM2,CTSG,CD6,VCAM1,NOS1,SGMS1,CPEB1,IRAK3,IRF8,CXCL13,PTPN22,HAVCR2,PLSCR2,HMGB2,MPO,CCL5,SERPINE1,FCGR4,CXCL10,CD274,PLSCR4,BMP6,CMPK2,ABCG2,EDN1,NOS3,MGST1,LYN,ELANE,PLSCR1,CD14,CCL2
GO:BP	regulation of nervous system process	GO:0031644	0.000178648	3.748	176	699	22	21331	CBLN1,CTSS,TAC4,CCN3,GRIN1,CARTPT,NOS1,FGF12,KCNJ10,CTSC,FCGR4,BEGAIN,PRKCZ,EDN1,NOS3,CHRNB4,SHISA9,FGFBP3,TNR,ADRB2,ITGAX,PTK2B
GO:BP	cell morphogenesis	GO:0000902	0.000179878	3.74502	1055	699	68	21331	SYT1,ACHE,PRRXL1,SEMA5B,SPTBN4,PHACTR1,CCL12,ALCAM,SYT4,MAP6,EPHA5,CNTN4,SLC1A3,CDH8,GRIN1,COL25A1,GREM1,IL7R,SHTN1,CXCL12,MAPT,BCAN,CORO1A,CRMP1,CYFIP2,ITGB7,PARVG,DCDC2A,SEMA3D,LAMA1,NYAP2,NCKAP1L,CLIC5,PTPN6,SLC23A2,TUBB2B,DST,CCL7,CACNA1A,STXBP1,RAC2,PRKCZ,FGR,BCL2,CAP2,CPNE9,UCHL1,LRP8,CCDC88C,NRCAM,DPYSL5,ANK3,TLX2,LHFPL5,TNR,CXCR4,ICAM1,DOCK5,CLU,ADCY1,SOX17,DIXDC1,SEMA3E,RHOU,CCL2,LPXN,PT…
GO:BP	blood vessel development	GO:0001568	0.000195312	3.70927	739	699	53	21331	CCL12,SP100,RNF213,OSR1,CCN3,CYBB,SYK,GREM1,C3AR1,SPHK1,HHIP,FGFBP1,CXCL12,NRXN3,BMP4,ITGB2,CCBE1,THBS1,LAMA1,HK2,C6,PGF,CCL5,SERPINE1,ANXA3,STAT1,CXCL10,FOXF1,RAMP1,GPR4,LEPR,PROK2,CEACAM1,MYO18B,EDN1,NOS3,NRCAM,C3,SPI1,CLDN5,CXCR4,CXCR2,ADRB2,TFAP2B,SOX17,HPSE,KLF5,SEMA3E,CHD7,CCL2,NDNF,ITGAX,PTK2B
GO:BP	mast cell degranulation	GO:0043303	0.000196733	3.70612	52	699	12	21331	PTGDS,TAC4,SYK,FCER1A,STXBP2,CD84,FOXF1,STXBP1,RAC2,FGR,FCER1G,LYN
GO:BP	regulation of calcium ion transport into cytosol	GO:0010522	0.000212917	3.67179	109	699	17	21331	ADCYAP1R1,GRIN1,SLC8A1,BMP4,CORO1A,PTPN6,CXCL10,BCL2,AKAP6,HTT,FCRL5,HAP1,LYN,ADRB2,CHD7,PRNP,PTK2B
GO:BP	homotypic cell-cell adhesion	GO:0034109	0.000243216	3.61401	74	699	14	21331	SLC7A11,SYK,PLEK,PTPN6,MEGF10,CCL5,STXBP1,CEACAM1,ALOX12,ANK3,LYN,ADRB2,ITGA2B,CXADR
GO:BP	regulation of viral process	GO:0050792	0.000243535	3.61344	194	699	23	21331	OASL2,TRIM30A,ZC3HAV1,BST2,OAS1A,OAS2,IFITM3,TRIM30D,ISG15,OASL1,RSAD2,OAS3,IFITM1,CCL5,STAT1,OAS1G,IFITM6,BCL2,APOBEC3,CXCR4,PLSCR1,MX2,PARP10
GO:BP	mast cell activation involved in immune response	GO:0002279	0.000246796	3.60766	53	699	12	21331	PTGDS,TAC4,SYK,FCER1A,STXBP2,CD84,FOXF1,STXBP1,RAC2,FGR,FCER1G,LYN
GO:BP	mast cell mediated immunity	GO:0002448	0.000246796	3.60766	53	699	12	21331	PTGDS,TAC4,SYK,FCER1A,STXBP2,CD84,FOXF1,STXBP1,RAC2,FGR,FCER1G,LYN
GO:BP	positive regulation of lymphocyte activation	GO:0051251	0.000251544	3.59939	395	699	35	21331	IGHA,IGLC1,SYK,PTPRC,IGLC2,SPN,CD6,IL7R,CD5,VCAM1,CORO1A,LCK,PTPN22,HAVCR2,NCKAP1L,ICOSL,CCL5,ITGAL,TRBC2,IGHD,CD274,GPR183,PRKCZ,BCL2,CD3E,IL2RG,DPP4,RASAL3,NFKBIZ,IGHG3,SIRPB1C,INPP5D,IRS2,IL12RB1,CCL2
GO:BP	regulation of mast cell degranulation	GO:0043304	0.000266058	3.57502	35	699	10	21331	SYK,FCER1A,STXBP2,CD84,FOXF1,STXBP1,RAC2,FGR,FCER1G,LYN
GO:BP	regulation of myeloid leukocyte mediated immunity	GO:0002886	0.000287829	3.54087	64	699	13	21331	SYK,FCGR1,FCER1A,ITGB2,STXBP2,CD84,FOXF1,STXBP1,RAC2,FGR,FCER1G,C3,LYN
GO:BP	monocyte chemotaxis	GO:0002548	0.000287829	3.54087	64	699	13	21331	CCL8,CCL12,CCN3,GREM1,CCR1,CXCL12,PLA2G7,CCL5,SERPINE1,CCL7,CXCL10,LYN,CCL2
GO:BP	negative regulation of leukocyte activation	GO:0002695	0.000295175	3.52992	181	699	22	21331	SAMSN1,SPN,GPNMB,SLFN1,VSIG4,BMP4,LAX1,PGLYRP1,PTPN22,HAVCR2,PTPN6,CD84,CD37,FOXF1,CD274,FGR,CEACAM1,LYN,CD300LF,INPP5D,PDE5A,PRNP
GO:BP	positive regulation of T cell proliferation	GO:0042102	0.000304925	3.51581	99	699	16	21331	SYK,PTPRC,SPN,CD6,VCAM1,CORO1A,PTPN22,HAVCR2,NCKAP1L,ICOSL,CCL5,ITGAL,CD274,CD3E,RASAL3,IL12RB1
GO:BP	platelet activation	GO:0030168	0.000311335	3.50677	87	699	15	21331	SLC7A11,SYK,PLEK,PTPN6,TREML1,STXBP1,CEACAM1,FCER1G,ALOX12,LYN,ADRB2,ITGA2B,PLA2G4A,VWF,ENTPD1
GO:BP	behavior	GO:0007610	0.00034345	3.46414	711	699	51	21331	ATP1A2,PTGDS,SLC7A11,SLC6A1,SPTBN4,SGIP1,B2M,SYT4,NPY,SLC1A3,GRIN1,CARTPT,CIART,CXCL12,MAPT,NOS1,TMOD2,FGF12,ITPR3,KCNJ10,DCDC2A,SEZ6L,ARRDC3,CACNA1B,PIRB,PBX3,PDE1B,CACNA1A,ASTN1,PRKCZ,BCL2,LEPR,UCHL1,HTT,DPP4,CHRNB4,FGFBP3,TNR,RASD2,ADRB2,BCHE,ADCY1,RIN1,PDE5A,CHD7,ABCA7,PRNP,SLC2A4,ADCY5,ADH1,SNCG
GO:BP	positive regulation of exocytosis	GO:0045921	0.000352131	3.4533	100	699	16	21331	SYT1,SYT4,CADPS,SYK,RAB27A,FCER1A,ITGB2,STXBP2,CACNA1B,SYT10,STXBP1,FGR,FCER1G,CACNB2,SYTL4,SYT7
GO:BP	regulation of mast cell activation involved in immune response	GO:0033006	0.000357626	3.44657	36	699	10	21331	SYK,FCER1A,STXBP2,CD84,FOXF1,STXBP1,RAC2,FGR,FCER1G,LYN
GO:BP	regulation of angiogenesis	GO:0045765	0.000370293	3.43145	330	699	31	21331	SP100,CYBB,GREM1,C3AR1,SPHK1,HHIP,FGFBP1,ITGB2,CCBE1,THBS1,HK2,C6,PGF,CCL5,SERPINE1,ANXA3,STAT1,CXCL10,GPR4,PROK2,CEACAM1,NOS3,C3,CLDN5,CXCR4,CXCR2,ADRB2,SEMA3E,CCL2,ITGAX,PTK2B
GO:BP	regulation of catalytic activity	GO:0050790	0.000393622	3.40492	2256	699	118	21331	C4B,PPP2R2B,CCL8,PHACTR1,ADCYAP1R1,CCL12,OASL2,ACER2,PPP1R1A,NAIP5,PRTN3,EPHA5,ZC3HAV1,NPR3,SCG5,BST2,GARNL3,NLRC5,SYK,OAS1A,PTPRC,GRIN1,OAS2,CARTPT,GREM1,TNFSF10,ARHGAP11A,SPOCK1,NAIP2,MAPT,VIPR2,NOS1,OASL1,PSMB8,BMP4,IQGAP2,FCGR1,LAX1,OAS3,CYFIP2,ARHGAP45,VAV1,FCER1A,IRAK3,APOBEC1,HP,PLEK,LCK,CXCL13,THBS1,PTPN22,HMGB2,NCKAP1L,ARRDC3,PTPN6,MLKL,CCL5,SERPINE1,MAP3K8,ACAP1,KNG2,ANXA3,CCL7,LCP2,CBS…
GO:BP	negative regulation of leukocyte proliferation	GO:0070664	0.000424814	3.3718	89	699	15	21331	CCL12,SPN,GREM1,GPNMB,SLFN1,VSIG4,BMP4,HAVCR2,PTPN6,CD274,CEACAM1,LYN,INPP5D,PDE5A,PRNP
GO:BP	cellular response to lipid	GO:0071396	0.000433435	3.36308	615	699	46	21331	ATP1A2,CCL12,ASS1,B2M,OSR1,EPHA5,TREM2,CTSG,CD6,SGMS1,BMP4,CPEB1,MGARP,IRF8,CXCL13,PTPN22,MLC1,HAVCR2,PLSCR2,HMGB2,SRARP,CCL5,SERPINE1,FCGR4,CXCL10,CD274,PLSCR4,BMP6,CMPK2,ALOX12,FLT3,LRP8,ABCG2,EDN1,NOS3,DGAT2,RORB,LYN,PLSCR1,CD14,CLU,ADCY1,EPHX1,CCL2,ADCY5,PTK2B
GO:BP	vascular process in circulatory system	GO:0003018	0.00044273	3.35386	216	699	24	21331	ATP1A2,ABCB1A,SLC2A1,NOS1,GCLC,KNG2,CBS,GPR4,BMP6,SLC22A2,RGS2,CEACAM1,ALOX12,EDN1,NOS3,SLC2A3,ASIC2,FGFBP3,CLDN5,CXCR2,ADRB2,ICAM1,DOCK5,PDE5A
GO:BP	regulation of vasculature development	GO:1901342	0.00049887	3.30201	370	699	33	21331	SP100,CYBB,GREM1,C3AR1,SPHK1,HHIP,FGFBP1,BMP4,ITGB2,CCBE1,THBS1,HK2,C6,PGF,CCL5,SERPINE1,ANXA3,STAT1,CXCL10,GPR4,PROK2,CEACAM1,NOS3,C3,CLDN5,CXCR4,CXCR2,ADRB2,KLF5,SEMA3E,CCL2,ITGAX,PTK2B
GO:BP	acute inflammatory response to antigenic stimulus	GO:0002438	0.000523119	3.2814	29	699	9	21331	SPN,CD6,FCGR1,FCER1A,FCER1G,C3,ELANE,CXCR2,ICAM1
GO:BP	cation transmembrane transport	GO:0098655	0.000526797	3.27836	868	699	58	21331	ATP1A2,SLC6A1,CTSS,OTOP3,DPP6,TRPM1,OSR1,SLC6A20A,PTPRC,SLC1A3,TREM2,GRIN1,SLC8A1,KCNT1,NOS1,BMP4,CORO1A,FGF12,ITPR3,KCNJ10,TRPM6,LCK,PTPN22,SLC30A10,PTPN6,TMEM37,CACNA1B,SLC38A5,TMEM63C,CXCL10,CACNA1A,TRPM2,ATP2A3,HPCA,AKAP6,SLC22A2,RGS2,HTT,FCRL5,SHISA9,COX8B,SLC7A2,ASIC2,ANK3,HAP1,SLC20A1,LYN,ADRB2,SCN3B,SLC9A2,CACNB2,CHD7,PRNP,SLC1A5,CCL2,KCNMB2,SLC25A28,PTK2B
GO:BP	regulation of response to cytokine stimulus	GO:0060759	0.000575975	3.2396	130	699	18	21331	IRF7,NLRC5,SYK,PTPRC,MMP12,TREM2,SPHK1,ZBP1,CASP4,IRAK3,CCL5,IFIH1,SIGIRR,PARP14,CD300LF,CXCR4,IL1R2,IRGM1
GO:BP	regulation of adaptive immune response	GO:0002819	0.000580704	3.23605	173	699	21	21331	IRF7,B2M,PTPRC,SAMSN1,SPN,IL7R,FCGR1,RSAD2,FCER1A,HAVCR2,PTPN6,CD274,PRKCZ,CEACAM1,FCER1G,DPP4,C3,PLA2G4A,NFKBIZ,IL18R1,IL12RB1
GO:BP	regulation of cell adhesion mediated by integrin	GO:0033628	0.00058407	3.23353	47	699	11	21331	ACER2,SYK,CXCL13,NCKAP1L,PTPN6,CCL5,SERPINE1,CD3E,DPP4,LYN,LPXN
GO:BP	regulation of cellular process	GO:0050794	0.000640571	3.19343	12202	699	464	21331	ATP1A2,SYT1,SCGN,GPR158,LY6C2,IGHA,IGLC1,ACHE,C4B,PRRXL1,PTGDS,CBLN1,SEMA5B,PPP2R2B,SLC7A11,IFIT2,CCL8,SLC6A1,CGA,SPTBN4,CTSS,PHACTR1,SGIP1,TAC4,GABRD,CD22,SCD1,ADCYAP1R1,CCL12,IRF7,RGR,POU2AF1,LY6A,OASL2,IFI211,IFI213,SLCO1A4,ACER2,ASS1,PPP1R1A,SP100,DOC2A,B2M,DPP6,SLC6A13,TRPM1,CD8A,ABCB1A,SYT4,NNAT,TRIM30A,SP110,MAP6,CADPS,RNF213,NPY,IFI27L2A,OSR1,NAIP5,PRTN3,AQP4,CCN3,EPHA5,ZC3HAV1,NPR3,SCG5,…
GO:BP	lysosome localization	GO:0032418	0.000670936	3.17332	80	699	14	21331	PTGDS,TAC4,MAP6,SYK,FCER1A,STXBP2,CD84,FOXF1,STXBP1,RAC2,FGR,FCER1G,LYN,SYTL4
GO:BP	viral life cycle	GO:0019058	0.000673246	3.17183	237	699	25	21331	OASL2,TRIM30A,ZC3HAV1,BST2,OAS1A,OAS2,IFITM3,TRIM30D,ISG15,OASL1,RSAD2,OAS3,IFITM1,CCL5,OAS1G,IFITM6,BCL2,CEACAM1,DPP4,APOBEC3,CD300LF,PLSCR1,MX2,ICAM1,PARP10
GO:BP	negative regulation of cell adhesion	GO:0007162	0.000677529	3.16907	287	699	28	21331	ACER2,ASS1,EPHA5,PTPRC,MMP12,SPN,GPNMB,SPOCK1,SLFN1,CXCL12,VSIG4,BMP4,LAX1,THBS1,PTPN22,HAVCR2,PTPN6,SERPINE1,CD274,BMP6,CEACAM1,ALOX12,TNR,ADRB2,PDE5A,SEMA3E,PRNP,LPXN
GO:BP	response to organic cyclic compound	GO:0014070	0.000679107	3.16806	1049	699	66	21331	ATP1A2,PTGDS,SLC7A11,SLC6A1,SLC22A6,ADCYAP1R1,CCL12,SLCO1A4,ASS1,EPHA5,ZC3HAV1,IFIT3,CYBB,GRIN1,USP18,LY6D,CASP7,SLC8A1,NOS1,BMP4,ACSBG1,MGARP,ITPR3,LDHA,IRAK3,PTPRN,THBS1,MLC1,HMGB2,GCLC,SRARP,CCL5,CACNA1B,ANXA3,CBS,ABCC4,SLC5A5,FOXF1,STXBP1,TRPM2,IFIH1,HPCA,BCL2,AKAP6,BMP6,FLT3,LRP8,ABCG2,EDN1,NOS3,NAMPT,LYN,CXCR4,AANAT,BCHE,CTNNA1,CLU,ADCY1,KLF5,ACR,EPHX1,CCL2,ADCY5,F7,ADH1,PTK2B
GO:BP	regulation of transmembrane transport	GO:0034762	0.000689254	3.16162	585	699	44	21331	ATP1A2,CTSS,DPP6,ABCB1A,OSR1,CYBB,TREM2,SLC8A1,NOS1,BMP4,CORO1A,FGF12,KCNJ10,THBS1,PTPN22,HK2,CLIC5,PTPN6,TMEM37,CACNA1B,CXCL10,CACNA1A,HPCA,BCL2,AKAP6,RGS2,HTT,FCRL5,EDN1,SHISA9,ASIC2,ANK3,C3,HAP1,LYN,ADRB2,SCN3B,IRS2,CACNB2,CHD7,PRNP,ENPP1,CCL2,PTK2B
GO:BP	vasculature development	GO:0001944	0.000716348	3.14488	770	699	53	21331	CCL12,SP100,RNF213,OSR1,CCN3,CYBB,SYK,GREM1,C3AR1,SPHK1,HHIP,FGFBP1,CXCL12,NRXN3,BMP4,ITGB2,CCBE1,THBS1,LAMA1,HK2,C6,PGF,CCL5,SERPINE1,ANXA3,STAT1,CXCL10,FOXF1,RAMP1,GPR4,LEPR,PROK2,CEACAM1,MYO18B,EDN1,NOS3,NRCAM,C3,SPI1,CLDN5,CXCR4,CXCR2,ADRB2,TFAP2B,SOX17,HPSE,KLF5,SEMA3E,CHD7,CCL2,NDNF,ITGAX,PTK2B
GO:BP	monocarboxylic acid transport	GO:0015718	0.000777239	3.10945	176	699	21	21331	SLC6A1,SLCO1A4,SLC6A13,SYK,SLC2A1,THBS1,SLC16A11,CYP4F18,SLC38A5,ABCC4,CACNA1A,SLCO2B1,CEACAM1,EDN1,SLC22A3,ABCC1,SLC10A6,PLA2G4A,SLC16A12,IRS2,NMB
GO:BP	regulation of cytokine-mediated signaling pathway	GO:0001959	0.000784091	3.10563	119	699	17	21331	IRF7,NLRC5,SYK,PTPRC,MMP12,TREM2,SPHK1,ZBP1,CASP4,IRAK3,CCL5,SIGIRR,PARP14,CD300LF,CXCR4,IL1R2,IRGM1
GO:BP	regulation of blood coagulation	GO:0030193	0.000786985	3.10403	81	699	14	21331	SYK,PLEK,TSPAN8,THBS1,SERPINE1,KNG2,CEACAM1,FCER1G,ALOX12,LYN,ADRB2,PLA2G4A,HPSE,F7
GO:BP	negative regulation of response to stimulus	GO:0048585	0.000798143	3.09792	1629	699	91	21331	CBLN1,SEMA5B,SLC7A11,CD22,CCL12,TRIM30A,RNF213,CCN3,BST2,NLRC5,NKD2,PTPRC,IRF4,MMP12,GRIN1,SAMSN1,SPN,CARTPT,GREM1,DERL3,PDCD1,CCR1,IL7R,HHIP,CXCL12,TAP1,VSIG4,BMP4,DHX58,LAX1,DGKD,PGLYRP1,IRAK3,PLEK,SEMA3D,TSPAN8,CXCL13,THBS1,PTPN22,HAVCR2,SLC30A10,HMGB2,ARRDC3,GCLC,PTPN6,CCL5,SERPINE1,KNG2,PDE10A,CD84,STAT1,FABP7,TREML1,FOXF1,PRKCZ,BCL2,RNF43,UCHL1,CD3E,RGS2,CEACAM1,ALOX12,HTT,FCRL5,DPP4,CCDC88…
GO:BP	regulation of hemostasis	GO:1900046	0.000920762	3.03585	82	699	14	21331	SYK,PLEK,TSPAN8,THBS1,SERPINE1,KNG2,CEACAM1,FCER1G,ALOX12,LYN,ADRB2,PLA2G4A,HPSE,F7
GO:BP	regulation of ion transmembrane transport	GO:0034765	0.000928349	3.03229	493	699	39	21331	ATP1A2,CTSS,DPP6,ABCB1A,OSR1,CYBB,TREM2,SLC8A1,NOS1,BMP4,CORO1A,FGF12,KCNJ10,THBS1,PTPN22,CLIC5,PTPN6,TMEM37,CACNA1B,CXCL10,CACNA1A,HPCA,AKAP6,RGS2,HTT,FCRL5,SHISA9,ASIC2,ANK3,HAP1,LYN,ADRB2,SCN3B,IRS2,CACNB2,CHD7,PRNP,CCL2,PTK2B
GO:BP	positive regulation of molecular function	GO:0044093	0.000948404	3.02301	1731	699	95	21331	CCL8,CTSS,ADCYAP1R1,CCL12,ACER2,B2M,ABCB1A,TRIM30A,PRTN3,EPHA5,ZC3HAV1,NPR3,GARNL3,SYK,PTPRC,IRF4,TREM2,GRIN1,CARTPT,GREM1,TNFSF10,SPHK1,ARHGAP11A,CYTL1,TRIM30D,IDE,NOS1,BMP4,FCGR1,CYFIP2,ARHGAP45,VAV1,FCER1A,IRAK3,APOBEC1,PLEK,ITGB2,IL18RAP,LCK,CXCL13,THBS1,HMGB2,NCKAP1L,ARRDC3,MLKL,CCL5,MAP3K8,ACAP1,ANXA3,CCL7,LCP2,RAMP1,ATP2A3,HPCA,PRKCZ,FGR,BCL2,AKAP6,PROK2,RGS2,CEACAM1,ALOX12,HTT,LRP8,EDN1,N…
GO:BP	tube morphogenesis	GO:0035239	0.00104891	2.97926	908	699	59	21331	CCL12,SP100,RNF213,OSR1,CCN3,CYBB,SYK,GREM1,C3AR1,SPHK1,MTHFD1L,HHIP,FGFBP1,CXCL12,WNT6,NRXN3,BMP4,ITGB2,CCBE1,THBS1,LAMA1,HK2,C6,PGF,CCL5,SERPINE1,ANXA3,STAT1,CXCL10,FOXF1,RAMP1,GPR4,BCL2,LEPR,PROK2,CEACAM1,ALOX12,MYO18B,EDN1,NOS3,NRCAM,SETDB2,C3,WNT9B,SPI1,CLDN5,CXCR4,CXCR2,ADRB2,TFAP2B,SOX17,HPSE,KLF5,SEMA3E,CHD7,CCL2,NDNF,ITGAX,PTK2B
GO:BP	immune response-activating cell surface receptor signaling pathway	GO:0002429	0.00107998	2.96659	311	699	29	21331	IGHA,IGLC1,CD22,SYK,PTPRC,IGLC2,SPN,C3AR1,LAX1,CD79A,LCK,PTPN22,NCKAP1L,ICOSL,PTPN6,TRBC2,IGHD,LCP2,BCL2,CD3E,CEACAM1,FCER1G,FCRL5,LYN,PLSCR1,NFKBIZ,IGHG3,PRNP,LPXN
GO:BP	tissue homeostasis	GO:0001894	0.00108141	2.96601	243	699	25	21331	ILDR2,CTSS,ABCB1A,SYK,SLC2A1,CARTPT,CYTL1,CORO1A,TNFRSF11B,FGF7,FCGR4,SLC28A2,RAC2,BCL2,CEACAM1,NOS3,GPR55,NAPSA,PIWIL4,CLDN5,ADRB2,PLA2G4A,INPP5D,CXADR,PTK2B
GO:BP	positive regulation of type I interferon production	GO:0032481	0.00114545	2.94102	50	699	11	21331	IRF7,ZC3HAV1,SYK,MMP12,DHX58,TLR7,PTPN22,HMGB2,STAT1,IFIH1,CD14
GO:BP	immune response-activating signal transduction	GO:0002757	0.00115448	2.93761	312	699	29	21331	IGHA,IGLC1,CD22,SYK,PTPRC,IGLC2,SPN,C3AR1,LAX1,CD79A,LCK,PTPN22,NCKAP1L,ICOSL,PTPN6,TRBC2,IGHD,LCP2,BCL2,CD3E,CEACAM1,FCER1G,FCRL5,LYN,PLSCR1,NFKBIZ,IGHG3,PRNP,LPXN
GO:BP	response to nitrogen compound	GO:1901698	0.00115878	2.936	1200	699	72	21331	LY6C2,SLC6A1,SLC22A6,LY6A,ASS1,ZC3HAV1,CYBB,SYK,SLC1A3,TREM2,SLC2A1,GRIN1,TNFSF10,GUCY1B1,DERL3,CASP7,SLC8A1,VCAM1,CXCL12,NOS1,CPEB1,MGARP,ITPR3,CASP4,LDHA,IRAK3,APOBEC1,PTPRN,PTPN22,SLC30A10,FBXO2,GCLC,CACNA1B,PDE1B,CBS,ABCC4,SLC5A5,CACNA1A,TRPM2,CYP2E1,IFIH1,HPCA,PRKCZ,AKAP6,SRSF5,RGS2,CEACAM1,FCER1G,FLT3,ABCG2,EDN1,MGST1,NAMPT,LYN,ABCC1,CXCR4,ADRB2,SERPINA3F,AANAT,BCHE,ICAM1,CTNNA1,KLF5,IRS2,P…
GO:BP	regulation of symbiotic process	GO:0043903	0.00121492	2.91545	212	699	23	21331	OASL2,TRIM30A,ZC3HAV1,BST2,OAS1A,OAS2,IFITM3,TRIM30D,ISG15,OASL1,RSAD2,OAS3,IFITM1,CCL5,STAT1,OAS1G,IFITM6,BCL2,APOBEC3,CXCR4,PLSCR1,MX2,PARP10
GO:BP	calcium ion transmembrane transport	GO:0070588	0.00123371	2.90879	313	699	29	21331	ATP1A2,TRPM1,PTPRC,GRIN1,SLC8A1,BMP4,CORO1A,ITPR3,TRPM6,LCK,PTPN22,PTPN6,TMEM37,CACNA1B,CXCL10,CACNA1A,TRPM2,ATP2A3,HPCA,AKAP6,HTT,FCRL5,HAP1,LYN,ADRB2,CACNB2,CHD7,PRNP,PTK2B
GO:BP	regulation of coagulation	GO:0050818	0.00125117	2.90268	84	699	14	21331	SYK,PLEK,TSPAN8,THBS1,SERPINE1,KNG2,CEACAM1,FCER1G,ALOX12,LYN,ADRB2,PLA2G4A,HPSE,F7
GO:BP	adult behavior	GO:0030534	0.00126	2.89963	166	699	20	21331	ATP1A2,SLC7A11,SPTBN4,NPY,GRIN1,CARTPT,CXCL12,MAPT,NOS1,FGF12,KCNJ10,SEZ6L,PBX3,CACNA1A,UCHL1,CHRNB4,FGFBP3,CHD7,ADH1,SNCG
GO:BP	response to abiotic stimulus	GO:0009628	0.00126098	2.89929	1180	699	71	21331	ATP1A2,PRRXL1,SEMA5B,SLC7A11,CTSS,TAC4,RGR,PAPPA2,TRPM1,ABCB1A,CYBB,PTPRC,SLC1A3,CDH8,SLC2A1,ADSSL1,GRIN1,GPR68,CASP7,MYOF,SLC8A1,PHF24,VCAM1,CXCL12,MAPT,NOS1,CPEB1,CIRBP,MGARP,TLR7,LDHA,APOBEC1,DCDC2A,PLAC8,LCK,THBS1,MLC1,HK2,GCLC,MPO,PGF,CCL7,PDE1B,CBS,LRP11,TRPM2,HPCA,GPR4,BCL2,LRRC8D,BMP6,HTT,DPP4,EDN1,NOS3,UIMC1,ASIC2,NAMPT,LYN,ELANE,LHFPL5,CXCR4,ADRB2,AANAT,CD14,PCARE,SLC2A4,CCL2,NDNF,F7,PT…
GO:BP	positive regulation of interleukin-4 production	GO:0032753	0.00134082	2.87263	24	699	8	21331	SYK,IRF4,PRG2,HAVCR2,ICOSL,PRKCZ,CD3E,FCER1G
GO:BP	cell-substrate adhesion	GO:0031589	0.00134821	2.87024	350	699	31	21331	ACER2,MMP12,GREM1,SNED1,SPOCK1,VCAM1,COL13A1,BCAN,CORO1A,ITGB7,PARVG,ITGB2,MSLN,THBS1,SERPINE1,ITGAL,FOXF1,RAC2,PRKCZ,BCL2,TTYH1,CD3E,ITGA2B,DOCK5,HPSE,SEMA3E,ITGB2L,VWF,NDNF,LPXN,PTK2B
GO:BP	positive regulation of inflammatory response	GO:0050729	0.0013626	2.86563	152	699	19	21331	CTSS,TREM2,CD6,ZBP1,FCGR1,CTSC,FCER1A,CCL5,SERPINE1,IL17RA,GPR4,FCER1G,C3,GBP5,ABCC1,PLA2G4A,NFKBIZ,LILRA5,PDE5A
GO:BP	alpha-beta T cell activation	GO:0046631	0.0013626	2.86563	152	699	19	21331	SYK,PTPRC,IRF4,SPN,RSAD2,PTPN22,NCKAP1L,LY9,CD274,GPR183,PRKCZ,BCL2,TNFSF8,CD3E,IL2RG,DOCK2,RASAL3,NFKBIZ,IL18R1
GO:BP	regulation of hydrolase activity	GO:0051336	0.00140688	2.85174	1252	699	74	21331	C4B,PPP2R2B,CCL8,PHACTR1,ADCYAP1R1,CCL12,OASL2,ACER2,PPP1R1A,NAIP5,PRTN3,EPHA5,ZC3HAV1,BST2,GARNL3,SYK,OAS1A,PTPRC,GRIN1,OAS2,TNFSF10,ARHGAP11A,SPOCK1,NAIP2,NOS1,OASL1,PSMB8,IQGAP2,OAS3,CYFIP2,ARHGAP45,VAV1,PLEK,LCK,CXCL13,THBS1,HMGB2,NCKAP1L,CCL5,SERPINE1,ACAP1,KNG2,CCL7,OAS1G,ATP2A3,HPCA,PRKCZ,LEPR,SPINK4,RGS2,ALOX12,HTT,NOS3,GPR55,GRTP1,C3,LYN,DOCK2,PLSCR1,ADRB2,RASAL3,ARHGDIB,SERPINA3F,ICAM1,…
GO:BP	response to organonitrogen compound	GO:0010243	0.00149264	2.82605	1095	699	67	21331	SLC6A1,SLC22A6,ASS1,CYBB,SYK,SLC1A3,TREM2,SLC2A1,GRIN1,TNFSF10,DERL3,CASP7,SLC8A1,VCAM1,CXCL12,NOS1,CPEB1,MGARP,ITPR3,CASP4,LDHA,IRAK3,APOBEC1,PTPRN,PTPN22,SLC30A10,FBXO2,GCLC,CACNA1B,PDE1B,CBS,ABCC4,SLC5A5,CACNA1A,TRPM2,CYP2E1,HPCA,PRKCZ,AKAP6,SRSF5,RGS2,CEACAM1,FCER1G,FLT3,ABCG2,EDN1,MGST1,NAMPT,LYN,ABCC1,CXCR4,ADRB2,SERPINA3F,AANAT,BCHE,ICAM1,CTNNA1,KLF5,IRS2,PRNP,SLC2A4,ENPP1,CCL2,ADCY5,F7,PT…
GO:BP	mononuclear cell migration	GO:0071674	0.00154823	2.81017	98	699	15	21331	CCL8,CCL12,CCN3,GREM1,C3AR1,CCR1,CXCL12,PLA2G7,CCL5,SERPINE1,CCL7,CXCL10,JAML,LYN,CCL2
GO:BP	lymphocyte activation involved in immune response	GO:0002285	0.0015495	2.80981	199	699	22	21331	POU2AF1,PTPRC,IRF4,SPN,RAB27A,CORO1A,PGLYRP1,HAVCR2,ICOSL,ITGAL,LY9,GPR183,PRKCZ,CEACAM1,FCER1G,LFNG,CLEC4D,ICAM1,NFKBIZ,LCP1,IL18R1,PTK2B
GO:BP	regulation of lymphocyte mediated immunity	GO:0002706	0.00166953	2.77741	154	699	19	21331	B2M,PTPRC,SPN,IL7R,TAP1,FCGR1,RSAD2,VAV1,FCER1A,IL18RAP,HAVCR2,PTPN6,PRKCZ,CEACAM1,FCER1G,DPP4,C3,CLEC2D,IL18R1
GO:BP	positive regulation of apoptotic cell clearance	GO:2000427	0.00168346	2.7738	7	699	5	21331	TREM2,C3,CD300LF,ABCA7,CCL2
GO:BP	chemokine-mediated signaling pathway	GO:0070098	0.00168426	2.77359	86	699	14	21331	CCL8,CCL12,TREM2,CCR1,CXCL12,CXCL13,CCL5,CCL7,CXCL10,ACKR2,CXCR4,CXCR2,CCL2,PTK2B
GO:BP	regulation of cellular localization	GO:0060341	0.00168992	2.77213	1054	699	65	21331	SYT1,SLC7A11,ADCYAP1R1,SP100,DPP6,SYT4,EPHA5,NKD2,SYK,PTPRC,TREM2,GRIN1,GPR68,SPHK1,DERL3,SLC8A1,MAPT,NOS1,NRXN3,BMP4,CORO1A,ITPR3,DCLK3,FCER1A,ITGB2,LCK,PTPN22,MLC1,STXBP2,PTPN6,CACNA1B,CD84,CXCL10,FOXF1,CACNA1A,STXBP1,TRPM2,RAC2,HPCA,PRKCZ,FGR,BCL2,LEPR,AKAP6,CEACAM1,FCER1G,HTT,FCRL5,PIWIL4,ANK3,HAP1,LYN,ADRB2,LCP1,ADCY1,CACNB2,CHD7,ABCA7,PRNP,SLC2A4,CCL2,ADCY5,SYT7,PTK2B,SNCG
GO:BP	regulation of peptidyl-tyrosine phosphorylation	GO:0050730	0.00172495	2.76322	266	699	26	21331	SYK,PTPRC,TREM2,SAMSN1,GREM1,FCGR1,FCER1A,ITGB2,LCK,PTPN22,PTPN6,FGF7,CCL5,PRKCZ,BMP6,CD3E,LRP8,PARP14,NCF1,LYN,ICAM1,LILRA5,CRLF1,PRNP,ZFYVE28,PTK2B
GO:BP	cellular process	GO:0009987	0.00177271	2.75136	17922	699	631	21331	ATP1A2,SYT1,SCGN,JCHAIN,GPR158,LY6C2,IGHA,IGLC1,ACHE,C4B,PRRXL1,PTGDS,CBLN1,SEMA5B,IFIT1,ILDR2,PPP2R2B,SLC7A11,IFIT2,CCL8,SLC6A1,CGA,SPTBN4,CTSS,PHACTR1,SGIP1,SLC22A8,SLC22A6,TAC4,GIMAP3,GABRD,CD22,SCD1,ADCYAP1R1,CCL12,IRF7,RGR,POU2AF1,LY6A,COL23A1,OASL2,SLC13A3,IFI211,IFI213,OTOP3,SLCO1A4,ACER2,ASS1,PPP1R1A,SP100,DOC2A,B2M,DPP6,ALCAM,SLC6A2,SLC6A13,BIN2,TRPM1,CD8A,ABCB1A,SYT4,NNAT,TRIM30A,SP110,…
GO:BP	negative regulation of response to external stimulus	GO:0032102	0.00185152	2.73247	392	699	33	21331	SEMA5B,CCL12,CCN3,NLRC5,MMP12,GRIN1,SPN,CARTPT,GREM1,CCR1,TAP1,VSIG4,DHX58,PGLYRP1,IRAK3,SEMA3D,TSPAN8,CXCL13,THBS1,HAVCR2,SERPINE1,KNG2,FABP7,FOXF1,CEACAM1,ALOX12,DPP4,PARP14,TNR,ADRB2,IL1R2,CLEC2D,SEMA3E
GO:BP	negative regulation of leukocyte mediated immunity	GO:0002704	0.00213751	2.67009	53	699	11	21331	BST2,PTPRC,SPN,IL7R,TAP1,HAVCR2,PTPN6,CD84,FOXF1,CEACAM1,CLEC2D
GO:BP	lipid transport	GO:0006869	0.0021941	2.65874	395	699	33	21331	SLCO1A4,ABCB1A,SYK,SLC2A1,APOL11B,THBS1,LRAT,PLSCR2,CYP4F18,ATP10A,APOL9B,APOL9A,ABCC4,APOBR,PLSCR4,BMP6,ABCB1B,SLCO2B1,SOAT1,CEACAM1,EDN1,MFSD2B,ATP10D,ABCC1,SLC10A6,PLSCR1,PLA2G4A,APOL10B,IRS2,ABCA7,SOAT2,NMB,SYT7
GO:BP	circulatory system process	GO:0003013	0.00219568	2.65843	530	699	40	21331	ATP1A2,SPTBN4,TAC4,ABCB1A,NPY,NPR3,SLC2A1,CARTPT,C3AR1,SLC8A1,NOS1,CYP4F18,GCLC,CACNA1B,KNG2,CBS,GPR4,AKAP6,BMP6,SLC22A2,RGS2,CEACAM1,ALOX12,EDN1,NOS3,SLC2A3,ASIC2,FGFBP3,NAMPT,CLDN5,CXCR4,CXCR2,ADRB2,SCN3B,ICAM1,DOCK5,PDE5A,CXADR,CACNB2,CHD7
GO:BP	positive regulation of secretion	GO:0051047	0.00221092	2.65543	452	699	36	21331	SYT1,SLC6A1,TAC4,SYT4,NNAT,CADPS,SYK,TREM2,GPR68,CARTPT,SPHK1,RAB27A,CXCL12,FCER1A,ITGB2,HAVCR2,CYP4F18,STXBP2,CACNA1B,SYT10,STXBP1,TRPM2,IFIH1,FGR,LEPR,BMP6,FCER1G,EDN1,PLA2G4A,CD14,LILRA5,IRS2,CACNB2,SYTL4,NMB,SYT7
GO:BP	programmed cell death	GO:0012501	0.00226672	2.6446	2010	699	105	21331	PPP2R2B,SLC7A11,IFIT2,CCL12,ACER2,SP100,SP110,ALDOC,IFI27L2A,OSR1,NAIP5,IFIT3,SYK,PTPRC,TREM2,GRIN1,SPN,GREM1,TNFSF10,SPHK1,CASP7,PDCD1,IL7R,ZBP1,HHIP,CD5,CXCL12,NAIP2,PDE1A,MAPT,CD3G,NOS1,SGMS1,BMP4,CORO1A,IER3,IFI204,CASP4,CYFIP2,IKZF3,CTSC,PGLYRP1,LDHA,IRAK3,PLAC8,LCK,THBS1,TNFRSF11B,HK2,SLC30A10,PLSCR2,HMGB2,NCKAP1L,GCLC,MEGF10,XAF1,C6,MLKL,CCL5,SERPINE1,CBS,CXCL10,CACNA1A,STXBP1,CD274,ATP2A3…
GO:BP	integrin-mediated signaling pathway	GO:0007229	0.00230212	2.63787	101	699	15	21331	SYK,ISG15,ITGB7,VAV1,PLEK,ITGB2,ITGAL,FGR,FCER1G,ITGAM,ITGA2B,CTNNA1,ITGB2L,ITGAX,PTK2B
GO:BP	viral process	GO:0016032	0.00235455	2.62809	323	699	29	21331	OASL2,TRIM30A,ZC3HAV1,BST2,OAS1A,OAS2,IFITM3,ZBP1,VCAM1,TRIM30D,ISG15,OASL1,RSAD2,OAS3,IFITM1,CCL5,STAT1,OAS1G,IFITM6,BCL2,CEACAM1,DPP4,APOBEC3,CD300LF,CXCR4,PLSCR1,MX2,ICAM1,PARP10
GO:BP	neutrophil activation	GO:0042119	0.00236547	2.62608	34	699	9	21331	SYK,ITGB2,IL18RAP,STXBP2,CCL5,FCGR4,ANXA3,FCER1G,CXCR2
GO:BP	regulation of tumor necrosis factor superfamily cytokine production	GO:1903555	0.00244278	2.61212	173	699	20	21331	TRIM30A,CYBB,SYK,PTPRC,TREM2,SPN,GPNMB,IRAK3,THBS1,PTPN22,HAVCR2,CD2,PTPN6,CD274,IFIH1,FCER1G,CD14,LILRA5,CLU,CCL2
GO:BP	regulation of adaptive immune response based on somatic recombination of immune receptors built from immunoglobulin superfamily domains	GO:0002822	0.00247954	2.60563	158	699	19	21331	B2M,PTPRC,SPN,IL7R,FCGR1,RSAD2,FCER1A,HAVCR2,PTPN6,CD274,PRKCZ,CEACAM1,FCER1G,DPP4,C3,PLA2G4A,NFKBIZ,IL18R1,IL12RB1
GO:BP	apoptotic process	GO:0006915	0.00256252	2.59133	1966	699	103	21331	PPP2R2B,SLC7A11,IFIT2,CCL12,ACER2,SP100,SP110,ALDOC,IFI27L2A,OSR1,NAIP5,IFIT3,SYK,PTPRC,TREM2,GRIN1,SPN,GREM1,TNFSF10,SPHK1,CASP7,PDCD1,IL7R,ZBP1,HHIP,CD5,CXCL12,NAIP2,PDE1A,MAPT,CD3G,NOS1,SGMS1,BMP4,CORO1A,IER3,IFI204,CASP4,CYFIP2,IKZF3,CTSC,PGLYRP1,LDHA,IRAK3,PLAC8,LCK,THBS1,TNFRSF11B,HK2,SLC30A10,PLSCR2,HMGB2,NCKAP1L,GCLC,MEGF10,XAF1,C6,CCL5,SERPINE1,CBS,CXCL10,CACNA1A,STXBP1,CD274,ATP2A3,PRKC…
GO:BP	dopamine transport	GO:0015872	0.00260555	2.5841	54	699	11	21331	SYT1,SLC6A2,SYT4,CXCL12,SYT10,SLC22A2,SLC22A3,SYT5,SYT7,ENTPD1,SNCG
GO:BP	locomotory behavior	GO:0007626	0.00262069	2.58158	238	699	24	21331	ATP1A2,SPTBN4,GRIN1,CIART,CXCL12,MAPT,FGF12,KCNJ10,SEZ6L,ARRDC3,CACNA1B,PBX3,PDE1B,CACNA1A,ASTN1,LEPR,UCHL1,DPP4,CHRNB4,TNR,RASD2,CHD7,ADCY5,SNCG
GO:BP	lipid localization	GO:0010876	0.00271795	2.56576	456	699	36	21331	SLCO1A4,ABCB1A,SYK,SLC2A1,APOL11B,THBS1,LRAT,PLSCR2,CYP4F18,ATP10A,APOL9B,APOL9A,ABCC4,APOBR,PLSCR4,BMP6,ABCB1B,SLCO2B1,SOAT1,CEACAM1,EDN1,MFSD2B,ATP10D,DGAT2,C3,ABCC1,SLC10A6,PLSCR1,PLA2G4A,APOL10B,IRS2,ABCA7,SOAT2,NMB,ENPP1,SYT7
GO:BP	positive regulation of phagocytosis	GO:0050766	0.00272209	2.5651	77	699	13	21331	PTPRC,TREM2,RAB27A,FCGR1,NCKAP1L,IL2RG,FCER1G,C3,DOCK2,CD300LF,SIRPB1C,ABCA7,CCL2
GO:BP	positive regulation of secretion by cell	GO:1903532	0.00274262	2.56183	399	699	33	21331	SYT1,SYT4,NNAT,CADPS,SYK,TREM2,GPR68,CARTPT,SPHK1,RAB27A,CXCL12,FCER1A,ITGB2,HAVCR2,STXBP2,CACNA1B,SYT10,STXBP1,TRPM2,IFIH1,FGR,LEPR,BMP6,FCER1G,EDN1,PLA2G4A,CD14,LILRA5,IRS2,CACNB2,SYTL4,NMB,SYT7
GO:BP	type I interferon signaling pathway	GO:0060337	0.00275455	2.55995	44	699	10	21331	IRF7,NLRC5,MMP12,OAS2,IFITM3,ZBP1,IFITM1,STAT1,IFITM6,STAT2
GO:BP	positive regulation of synaptic transmission	GO:0050806	0.00302798	2.51885	207	699	22	21331	SYT1,SCGN,SLC1A3,GRIN1,SPHK1,GFAP,GRIA4,NOS1,ITPR3,CACNA1B,PIRB,STXBP1,PRKCZ,HAP1,TNR,ADRB2,ADCY1,CACNB2,PRNP,CCL2,SYT7,PTK2B
GO:BP	myeloid cell differentiation	GO:0030099	0.00306218	2.51397	401	699	33	21331	B2M,PRTN3,IRF4,TREM2,GPR68,CARTPT,CCR1,ISG15,BMP4,IRF8,HMGB2,NCKAP1L,PTPN6,CCL5,PIRB,PDE1B,STAT1,GPR183,OSTM1,CEACAM1,FCER1G,GPR55,PRXL2A,LYN,SPI1,CD300LF,CSF3R,PLSCR1,UBD,CLEC2D,INPP5D,IKZF1,PTK2B
GO:BP	regulation of cation transmembrane transport	GO:1904062	0.00311647	2.50634	364	699	31	21331	ATP1A2,CTSS,DPP6,OSR1,TREM2,SLC8A1,NOS1,BMP4,CORO1A,FGF12,PTPN22,PTPN6,CXCL10,CACNA1A,HPCA,AKAP6,RGS2,HTT,FCRL5,SHISA9,ASIC2,ANK3,HAP1,LYN,ADRB2,SCN3B,CACNB2,CHD7,PRNP,CCL2,PTK2B
GO:BP	peptidyl-tyrosine phosphorylation	GO:0018108	0.00319412	2.49565	383	699	32	21331	EPHA5,SYK,PTPRC,TREM2,SAMSN1,GREM1,FCGR1,FCER1A,ITGB2,LCK,PTPN22,PTPN6,FGF7,CCL5,SLA,PRKCZ,FGR,BMP6,CD3E,FLT3,LRP8,PARP14,NCF1,LYN,ICAM1,LILRA5,CRLF1,PRNP,IL12RB1,ZFYVE28,PTK2B,HCK
GO:BP	regulation of phosphate metabolic process	GO:0019220	0.00320714	2.49388	1804	699	96	21331	PPP2R2B,CCL8,SPTBN4,PHACTR1,ADCYAP1R1,CCL12,PPP1R1A,EPHA5,NLRC5,SYK,PTPRC,TREM2,SAMSN1,SPN,CARTPT,GREM1,CD6,SPHK1,GPNMB,CCR1,SLFN1,MAPT,NOS1,BMP4,FCGR1,LAX1,TLR7,FCER1A,IRAK3,PLEK,ITGB2,LCK,THBS1,PTPN22,HAVCR2,SLC30A10,NCKAP1L,PTPN6,MLKL,PGF,FGF7,CCL5,MAP3K8,PIRB,CCL7,LCP2,CBS,CDKN2C,GPR183,RAC2,HPCA,PRKCZ,FGR,BCL2,LEPR,AKAP6,BMP6,PROK2,UCHL1,CD3E,RGS2,CEACAM1,HTT,LRP8,CCDC88C,EDN1,NOS3,GPR55,TLR…
GO:BP	regulation of phosphorus metabolic process	GO:0051174	0.00328522	2.48344	1805	699	96	21331	PPP2R2B,CCL8,SPTBN4,PHACTR1,ADCYAP1R1,CCL12,PPP1R1A,EPHA5,NLRC5,SYK,PTPRC,TREM2,SAMSN1,SPN,CARTPT,GREM1,CD6,SPHK1,GPNMB,CCR1,SLFN1,MAPT,NOS1,BMP4,FCGR1,LAX1,TLR7,FCER1A,IRAK3,PLEK,ITGB2,LCK,THBS1,PTPN22,HAVCR2,SLC30A10,NCKAP1L,PTPN6,MLKL,PGF,FGF7,CCL5,MAP3K8,PIRB,CCL7,LCP2,CBS,CDKN2C,GPR183,RAC2,HPCA,PRKCZ,FGR,BCL2,LEPR,AKAP6,BMP6,PROK2,UCHL1,CD3E,RGS2,CEACAM1,HTT,LRP8,CCDC88C,EDN1,NOS3,GPR55,TLR…
GO:BP	acute inflammatory response	GO:0002526	0.00352608	2.45271	118	699	16	21331	ASS1,SPN,CD6,VCAM1,FCGR1,FCER1A,HP,CCL5,FCER1G,SIGIRR,C3,ELANE,CXCR2,PLSCR1,ICAM1,SERPINA1B
GO:BP	cellular extravasation	GO:0045123	0.0036467	2.4381	67	699	12	21331	PRTN3,SPN,VCAM1,CXCL12,ITGB7,ITGB2,CCL5,ITGAL,JAML,ELANE,ICAM1,CCL2
GO:BP	regulation of interferon-alpha production	GO:0032647	0.00370952	2.43068	27	699	8	21331	IRF7,ZC3HAV1,MMP12,TLR7,PTPN22,HAVCR2,STAT1,IFIH1
GO:BP	peptidyl-tyrosine modification	GO:0018212	0.00377734	2.42281	386	699	32	21331	EPHA5,SYK,PTPRC,TREM2,SAMSN1,GREM1,FCGR1,FCER1A,ITGB2,LCK,PTPN22,PTPN6,FGF7,CCL5,SLA,PRKCZ,FGR,BMP6,CD3E,FLT3,LRP8,PARP14,NCF1,LYN,ICAM1,LILRA5,CRLF1,PRNP,IL12RB1,ZFYVE28,PTK2B,HCK
GO:BP	regulation of protein phosphorylation	GO:0001932	0.00381202	2.41884	1474	699	82	21331	CCL8,SPTBN4,CCL12,SYK,PTPRC,TREM2,SAMSN1,SPN,CARTPT,GREM1,CD6,SPHK1,GPNMB,CCR1,SLFN1,NOS1,BMP4,FCGR1,LAX1,TLR7,FCER1A,IRAK3,ITGB2,LCK,THBS1,PTPN22,HAVCR2,SLC30A10,NCKAP1L,PTPN6,MLKL,PGF,FGF7,CCL5,MAP3K8,CCL7,LCP2,CBS,CDKN2C,GPR183,RAC2,PRKCZ,FGR,BCL2,LEPR,AKAP6,BMP6,PROK2,UCHL1,CD3E,RGS2,CEACAM1,HTT,LRP8,CCDC88C,EDN1,GPR55,TLR13,C3,PARP14,NCF1,BMP8A,FGFBP3,WNT9B,LYN,PIK3R5,ADRB2,STAT2,ICAM1,LILRA…
GO:BP	positive regulation of response to cytokine stimulus	GO:0060760	0.00381876	2.41808	56	699	11	21331	IRF7,NLRC5,MMP12,TREM2,ZBP1,CASP4,IFIH1,PARP14,CD300LF,CXCR4,IRGM1
GO:BP	neurogenesis	GO:0022008	0.00395667	2.40267	1764	699	94	21331	SYT1,ACHE,PRRXL1,CBLN1,SEMA5B,SPTBN4,PHACTR1,CCL12,B2M,ALCAM,TRPM1,SYT4,MAP6,NPY,EPHA5,CNTN4,SLC1A3,TREM2,GRIN1,COL25A1,SPHK1,GFAP,HHIP,SPOCK1,VCAM1,SHTN1,CXCL12,WNT6,MAPT,NOS1,BMP4,BCAN,CPEB1,CRMP1,CYFIP2,KCNJ10,C1QA,SH3GL3,DCDC2A,SEMA3D,LAMA1,NYAP2,HMGB2,NCKAP1L,CLIC5,SLC23A2,CHD5,CCL5,TUBB2B,DST,GLDN,PBX3,FABP7,CDKN2C,CACNA1A,STXBP1,ASTN1,GPR183,RAC2,PRKCZ,BCL2,CPNE9,LEPR,BMP6,UCHL1,CD3E,RGS2,…
GO:BP	calcium ion transmembrane import into cytosol	GO:0097553	0.00401408	2.39641	148	699	18	21331	PTPRC,GRIN1,SLC8A1,CORO1A,ITPR3,LCK,PTPN6,CXCL10,TRPM2,AKAP6,HTT,FCRL5,HAP1,LYN,ADRB2,CHD7,PRNP,PTK2B
GO:BP	negative regulation of lymphocyte activation	GO:0051250	0.00401408	2.39641	148	699	18	21331	SAMSN1,SPN,GPNMB,SLFN1,VSIG4,BMP4,LAX1,PGLYRP1,PTPN22,HAVCR2,PTPN6,CD274,FGR,CEACAM1,LYN,INPP5D,PDE5A,PRNP
GO:BP	nervous system development	GO:0007399	0.00403794	2.39384	2412	699	120	21331	ATP1A2,SYT1,ACHE,PRRXL1,CBLN1,SEMA5B,SLC7A11,SPTBN4,PHACTR1,CCL12,B2M,ALCAM,TRPM1,ABCB1A,SYT4,NNAT,MAP6,NPY,EPHA5,CNTN4,SLC1A3,TREM2,SLC2A1,GRIN1,COL25A1,SPHK1,CCR1,MTHFD1L,GFAP,SLC8A1,HHIP,SPOCK1,VCAM1,SHTN1,CXCL12,WNT6,MAPT,NOS1,NRXN3,BMP4,BCAN,CPEB1,CRMP1,CYFIP2,KCNJ10,CTSC,TAL2,C1QA,SH3GL3,DCDC2A,SEMA3D,LAMA1,NYAP2,SEZ6L,HMGB2,NCKAP1L,CLIC5,SLC23A2,CHD5,CCL5,TUBB2B,DST,ANXA3,GLDN,PBX3,FABP7,C…
GO:BP	tumor necrosis factor superfamily cytokine production	GO:0071706	0.00418387	2.37842	179	699	20	21331	TRIM30A,CYBB,SYK,PTPRC,TREM2,SPN,GPNMB,IRAK3,THBS1,PTPN22,HAVCR2,CD2,PTPN6,CD274,IFIH1,FCER1G,CD14,LILRA5,CLU,CCL2
GO:BP	positive regulation of angiogenesis	GO:0045766	0.00418387	2.37842	179	699	20	21331	CYBB,GREM1,C3AR1,SPHK1,FGFBP1,ITGB2,CCBE1,THBS1,HK2,C6,PGF,CCL5,SERPINE1,ANXA3,NOS3,C3,CXCR4,CXCR2,ITGAX,PTK2B
GO:BP	cellular response to type I interferon	GO:0071357	0.00426539	2.37004	46	699	10	21331	IRF7,NLRC5,MMP12,OAS2,IFITM3,ZBP1,IFITM1,STAT1,IFITM6,STAT2
GO:BP	response to endogenous stimulus	GO:0009719	0.00428843	2.3677	1622	699	88	21331	ATP1A2,PTGDS,CGA,CTSS,ASS1,EPHA5,CYBB,SYK,TREM2,SLC2A1,GREM1,TNFSF10,CASP7,SLC8A1,HHIP,FGFBP1,VCAM1,CXCL12,NAIP2,NOS1,BMP4,CORO1A,CPEB1,ACSBG1,FGF12,MGARP,ITPR3,CASP4,LDHA,APOBEC1,PTPRN,CXCL13,THBS1,PTPN22,TNFRSF11B,SLC30A10,HMGB2,GCLC,SRARP,PGF,FGF7,CCL5,ANXA3,SLC5A5,CACNA1A,TRPM2,RAMP1,PRKCZ,BCL2,LEPR,AKAP6,BMP6,SRSF5,CEACAM1,FCER1G,FLT3,ABCG2,EDN1,NOS3,BMP8A,FGFBP3,NAMPT,LYN,ABCC1,CLDN5,STMN2,…
GO:BP	platelet degranulation	GO:0002576	0.00436767	2.35975	8	699	5	21331	SYK,PLEK,STXBP1,FCER1G,LYN
GO:BP	antigen receptor-mediated signaling pathway	GO:0050851	0.00454042	2.3429	280	699	26	21331	IGHA,IGLC1,CD22,SYK,PTPRC,IGLC2,SPN,LAX1,CD79A,LCK,PTPN22,NCKAP1L,ICOSL,PTPN6,TRBC2,IGHD,LCP2,BCL2,CD3E,CEACAM1,FCRL5,LYN,NFKBIZ,IGHG3,PRNP,LPXN
GO:BP	regulation of calcium ion transmembrane transport	GO:1903169	0.00479547	2.31917	165	699	19	21331	ATP1A2,SLC8A1,BMP4,CORO1A,PTPN22,PTPN6,CXCL10,CACNA1A,HPCA,AKAP6,HTT,FCRL5,HAP1,LYN,ADRB2,CACNB2,CHD7,PRNP,PTK2B
GO:BP	catecholamine transport	GO:0051937	0.00493098	2.30707	81	699	13	21331	SYT1,SLC6A2,SYT4,CADPS,CARTPT,CXCL12,SYT10,SLC22A2,SLC22A3,SYT5,SYT7,ENTPD1,SNCG
GO:BP	response to alcohol	GO:0097305	0.0051825	2.28546	282	699	26	21331	ADCYAP1R1,EPHA5,CYBB,GRIN1,VCAM1,APOBEC1,MLC1,CCL7,CYP2E1,BCL2,RGS2,LRP8,SPI1,CLDN5,AANAT,CD14,CTNNA1,ALDH1A1,ADCY1,ADH7,SLC2A4,CCL2,ADCY5,F7,ADH1,PTK2B
GO:BP	neuron development	GO:0048666	0.005184	2.28534	1204	699	70	21331	SYT1,ACHE,PRRXL1,SEMA5B,SPTBN4,PHACTR1,B2M,ALCAM,TRPM1,SYT4,MAP6,NPY,EPHA5,CNTN4,SLC1A3,GRIN1,COL25A1,SPHK1,GFAP,SPOCK1,SHTN1,CXCL12,MAPT,BMP4,BCAN,CPEB1,CRMP1,CYFIP2,C1QA,DCDC2A,SEMA3D,LAMA1,NYAP2,NCKAP1L,CLIC5,SLC23A2,TUBB2B,DST,GLDN,PBX3,CACNA1A,STXBP1,RAC2,PRKCZ,BCL2,CPNE9,UCHL1,CD3E,RGS2,LRP8,NRCAM,RORB,DPYSL5,ANK3,C3,HAP1,LYN,TLX2,LHFPL5,TNR,STMN2,CXCR4,CTNNA1,CLU,ADCY1,DIXDC1,SEMA3E,PCARE,…
GO:BP	response to amyloid-beta	GO:1904645	0.00526034	2.27899	47	699	10	21331	TREM2,VCAM1,CASP4,CACNA1B,CACNA1A,NAMPT,ABCC1,ADRB2,ICAM1,PRNP
GO:BP	negative regulation of cytokine production	GO:0001818	0.00535358	2.27136	265	699	25	21331	TRIM30A,AQP4,BST2,PTPRC,TREM2,GPNMB,VSIG4,PRG2,DHX58,PGLYRP1,IRAK3,THBS1,PTPN22,HAVCR2,NCKAP1L,PTPN6,CD84,CD274,CEACAM1,SIGIRR,ELANE,LILRA5,IL1R2,INPP5D,PRNP
GO:BP	negative regulation of lymphocyte proliferation	GO:0050672	0.00568653	2.24515	82	699	13	21331	SPN,GPNMB,SLFN1,VSIG4,BMP4,HAVCR2,PTPN6,CD274,CEACAM1,LYN,INPP5D,PDE5A,PRNP
GO:BP	regulation of phosphorylation	GO:0042325	0.00594616	2.22576	1611	699	87	21331	CCL8,SPTBN4,PHACTR1,CCL12,EPHA5,NLRC5,SYK,PTPRC,TREM2,SAMSN1,SPN,CARTPT,GREM1,CD6,SPHK1,GPNMB,CCR1,SLFN1,MAPT,NOS1,BMP4,FCGR1,LAX1,TLR7,FCER1A,IRAK3,ITGB2,LCK,THBS1,PTPN22,HAVCR2,SLC30A10,NCKAP1L,PTPN6,MLKL,PGF,FGF7,CCL5,MAP3K8,CCL7,LCP2,CBS,CDKN2C,GPR183,RAC2,PRKCZ,FGR,BCL2,LEPR,AKAP6,BMP6,PROK2,UCHL1,CD3E,RGS2,CEACAM1,HTT,LRP8,CCDC88C,EDN1,GPR55,TLR13,C3,PARP14,NCF1,BMP8A,FGFBP3,WNT9B,LYN,PIK3R…
GO:BP	anatomical structure formation involved in morphogenesis	GO:0048646	0.00602103	2.22033	1163	699	68	21331	CBLN1,CCL8,CCL12,SP100,RNF213,OSR1,CCN3,NEBL,CYBB,SYK,CD53,TREM2,GREM1,C3AR1,SPHK1,MYOF,MTHFD1L,HHIP,FGFBP1,CXCL12,WNT6,NRXN3,BMP4,TMOD2,ITGB2,IFITM1,CCBE1,THBS1,HK2,PTPN6,C6,PGF,CCL5,SERPINE1,ANXA3,STAT1,CXCL10,FOXF1,CACNA1A,RAMP1,GPR4,LEPR,PROK2,CEACAM1,LRP8,EDN1,NOS3,NRCAM,C3,LFNG,WNT9B,CLDN5,TLX2,CXCR4,CXCR2,CSF3R,ADRB2,TFAP2B,ALDH1A1,GDF3,SOX17,HPSE,KLF5,SEMA3E,CCL2,NDNF,ITGAX,PTK2B
GO:BP	inorganic ion transmembrane transport	GO:0098660	0.00619773	2.20777	849	699	54	21331	ATP1A2,SLC6A1,GABRD,OTOP3,DPP6,TRPM1,OSR1,PTPRC,SLC1A3,TREM2,GRIN1,SLC8A1,GABRR3,KCNT1,NOS1,BMP4,CORO1A,FGF12,ITPR3,KCNJ10,TRPM6,LCK,PTPN22,SLC30A10,CLIC5,PTPN6,TMEM37,CLCA3A1,CACNA1B,CXCL10,SLC5A5,CACNA1A,TRPM2,ATP2A3,HPCA,TTYH1,AKAP6,HTT,FCRL5,COX8B,ASIC2,ANK3,HAP1,SLC20A1,LYN,ADRB2,SCN3B,SLC9A2,CACNB2,CHD7,PRNP,KCNMB2,SLC25A28,PTK2B
GO:BP	neuron projection morphogenesis	GO:0048812	0.00647683	2.18864	657	699	45	21331	SYT1,ACHE,PRRXL1,SEMA5B,SPTBN4,PHACTR1,ALCAM,SYT4,MAP6,EPHA5,CNTN4,GRIN1,COL25A1,SHTN1,CXCL12,MAPT,BCAN,CRMP1,CYFIP2,DCDC2A,SEMA3D,LAMA1,NYAP2,NCKAP1L,SLC23A2,TUBB2B,DST,CACNA1A,STXBP1,RAC2,PRKCZ,BCL2,CPNE9,UCHL1,LRP8,NRCAM,DPYSL5,ANK3,TLX2,TNR,CXCR4,CLU,ADCY1,DIXDC1,SEMA3E
GO:BP	negative regulation of mononuclear cell proliferation	GO:0032945	0.00654302	2.18422	83	699	13	21331	SPN,GPNMB,SLFN1,VSIG4,BMP4,HAVCR2,PTPN6,CD274,CEACAM1,LYN,INPP5D,PDE5A,PRNP
GO:BP	negative regulation of innate immune response	GO:0045824	0.00656459	2.18279	59	699	11	21331	NLRC5,MMP12,CCR1,TAP1,VSIG4,DHX58,IRAK3,HAVCR2,CEACAM1,PARP14,CLEC2D
GO:BP	interferon-alpha production	GO:0032607	0.00676723	2.16959	29	699	8	21331	IRF7,ZC3HAV1,MMP12,TLR7,PTPN22,HAVCR2,STAT1,IFIH1
GO:BP	positive regulation of vasculature development	GO:1904018	0.00689892	2.16122	201	699	21	21331	CYBB,GREM1,C3AR1,SPHK1,FGFBP1,ITGB2,CCBE1,THBS1,HK2,C6,PGF,CCL5,SERPINE1,ANXA3,CEACAM1,NOS3,C3,CXCR4,CXCR2,ITGAX,PTK2B
GO:BP	regulation of cell death	GO:0010941	0.0071576	2.14523	1789	699	94	21331	PPP2R2B,SLC7A11,IFIT2,ADCYAP1R1,CCL12,ACER2,SP100,SLC6A13,ABCB1A,SP110,OSR1,NAIP5,CCN3,IFIT3,SYK,PTPRC,TREM2,GRIN1,GREM1,TNFSF10,SPHK1,GPNMB,PDCD1,IL7R,ZBP1,HHIP,CXCL12,NAIP2,PDE1A,MAPT,CD3G,NOS1,BMP4,CORO1A,IER3,CASP4,IKZF3,CTSC,LDHA,IRAK3,C1QA,HP,PLAC8,LCK,THBS1,SLC30A10,HMGB2,NCKAP1L,GCLC,C6,SLC23A2,CCL5,SERPINE1,CBS,CXCL10,CACNA1A,STXBP1,TRPM2,CD274,ATP2A3,PRKCZ,BCL2,PROK2,FCER1G,ALOX12,HTT,L…
GO:BP	myeloid leukocyte differentiation	GO:0002573	0.00717129	2.1444	218	699	22	21331	PRTN3,IRF4,TREM2,GPR68,CARTPT,CCR1,BMP4,CCL5,PIRB,PDE1B,GPR183,OSTM1,CEACAM1,FCER1G,GPR55,PRXL2A,LYN,SPI1,CD300LF,UBD,CLEC2D,INPP5D
GO:BP	cellular response to chemokine	GO:1990869	0.00744702	2.12802	97	699	14	21331	CCL8,CCL12,TREM2,CCR1,CXCL12,CXCL13,CCL5,CCL7,CXCL10,ACKR2,CXCR4,CXCR2,CCL2,PTK2B
GO:BP	response to chemokine	GO:1990868	0.00744702	2.12802	97	699	14	21331	CCL8,CCL12,TREM2,CCR1,CXCL12,CXCL13,CCL5,CCL7,CXCL10,ACKR2,CXCR4,CXCR2,CCL2,PTK2B
GO:BP	regulation of mononuclear cell migration	GO:0071675	0.00780269	2.10776	60	699	11	21331	CCN3,GREM1,C3AR1,CCR1,CXCL12,PLA2G7,CCL5,SERPINE1,CXCL10,LYN,CCL2
GO:BP	positive regulation of cytokine-mediated signaling pathway	GO:0001961	0.00786922	2.10407	49	699	10	21331	IRF7,NLRC5,MMP12,TREM2,ZBP1,CASP4,PARP14,CD300LF,CXCR4,IRGM1
GO:BP	regulation of tumor necrosis factor production	GO:0032680	0.00818593	2.08693	171	699	19	21331	TRIM30A,CYBB,SYK,PTPRC,TREM2,SPN,GPNMB,IRAK3,THBS1,PTPN22,HAVCR2,CD2,PTPN6,IFIH1,FCER1G,CD14,LILRA5,CLU,CCL2
GO:BP	response to calcium ion	GO:0051592	0.00859401	2.0658	156	699	18	21331	SYT1,SLC6A1,SYT4,ITPR3,APOBEC1,THBS1,CPNE7,SYT10,TRPM2,HPCA,EDN1,SYT5,AANAT,PLA2G4A,ADCY1,KCNMB2,SYT7,PTK2B
GO:BP	lymphocyte migration	GO:0072676	0.00870637	2.06016	112	699	15	21331	CCL8,CCL12,SPN,CXCL12,ITGB7,CXCL13,CCL5,ITGAL,CCL7,CXCL10,CH25H,GPR183,ICAM1,CCL2,PTK2B
GO:BP	regulation of cellular component organization	GO:0051128	0.00959832	2.0178	2455	699	120	21331	SYT1,ACHE,CBLN1,SEMA5B,SLC7A11,CCL8,SPTBN4,SGIP1,CD22,B2M,SYT4,TRIM30A,MAP6,CCN3,EPHA5,BST2,SYK,CDH8,CD53,TREM2,GRIN1,GREM1,TNFSF10,SPHK1,GFAP,SPOCK1,SHTN1,CXCL12,MAPT,DCBLD2,NOS1,BMP4,CORO1A,CPEB1,EPS8L1,TMOD2,CIRBP,IQGAP2,CRMP1,FCGR1,MGARP,CYFIP2,DGKD,IRAK3,VILL,APOBEC1,SH3GL3,DCDC2A,PLEK,SEMA3D,CXCL13,HK2,NCKAP1L,GCLC,XAF1,SLC23A2,SERPINE1,MNDAL,TUBB2B,DST,CXCL10,CDKN2C,CACNA1A,STXBP1,TRPM2,RA…
GO:BP	positive regulation of monocyte chemotaxis	GO:0090026	0.00992902	2.00309	22	699	7	21331	CCR1,CXCL12,PLA2G7,CCL5,SERPINE1,CXCL10,CCL2
GO:BP	positive regulation of interferon-alpha production	GO:0032727	0.00992902	2.00309	22	699	7	21331	IRF7,ZC3HAV1,MMP12,TLR7,PTPN22,STAT1,IFIH1
GO:BP	calcium ion-regulated exocytosis of neurotransmitter	GO:0048791	0.00992902	2.00309	22	699	7	21331	SYT1,CADPS,SYT10,CACNA1A,STXBP1,SYT5,SYT7
GO:BP	cellular response to amyloid-beta	GO:1904646	0.010342	1.9854	40	699	9	21331	TREM2,VCAM1,CASP4,CACNA1A,NAMPT,ABCC1,ADRB2,ICAM1,PRNP
GO:BP	negative regulation of cell communication	GO:0010648	0.0104786	1.9797	1370	699	76	21331	CBLN1,SLC6A1,CD22,SYT4,TRIM30A,RNF213,CCN3,NLRC5,NKD2,PTPRC,IRF4,MMP12,CARTPT,GREM1,HHIP,CXCL12,MAPT,NOS1,BMP4,DHX58,LAX1,DGKD,IRAK3,PLEK,THBS1,PTPN22,HMGB2,ARRDC3,GCLC,PTPN6,CCL5,SERPINE1,PDE10A,PIRB,STAT1,TREML1,STXBP1,PRKCZ,BCL2,RNF43,UCHL1,CD3E,RGS2,CEACAM1,HTT,FCRL5,CCDC88C,EDN1,SIGIRR,PARP14,LFNG,BMP8A,LYN,BEND6,TNR,CD300LF,ADRB2,RASAL3,BCHE,ICAM1,CTNNA1,CLU,GDF3,SOX17,IL1R2,INPP5D,SYTL4,PR…
GO:BP	interleukin-6 production	GO:0032635	0.0105898	1.97511	174	699	19	21331	POU2AF1,TRIM30A,AQP4,SYK,TREM2,DHX58,TLR7,IRAK3,IL18RAP,PTPN22,HAVCR2,NCKAP1L,PTPN6,IL17RA,IFIH1,FCER1G,POU2F2,LILRA5,INPP5D
GO:BP	regulation of ribonuclease activity	GO:0060700	0.0107039	1.97046	15	699	6	21331	OASL2,OAS1A,OAS2,OASL1,OAS3,OAS1G
GO:BP	organic hydroxy compound transport	GO:0015850	0.0110718	1.95578	276	699	25	21331	SYT1,SLCO1A4,SLC6A2,SYT4,CADPS,SYK,CARTPT,CXCL12,NOS1,FCER1A,SYT10,BMP6,SLC22A2,SLCO2B1,SOAT1,CEACAM1,FCER1G,SLC22A3,SLC10A6,SYT5,ABCA7,SOAT2,SYT7,ENTPD1,SNCG
GO:BP	negative regulation of signaling	GO:0023057	0.011335	1.94558	1373	699	76	21331	CBLN1,SLC6A1,CD22,SYT4,TRIM30A,RNF213,CCN3,NLRC5,NKD2,PTPRC,IRF4,MMP12,CARTPT,GREM1,HHIP,CXCL12,MAPT,NOS1,BMP4,DHX58,LAX1,DGKD,IRAK3,PLEK,THBS1,PTPN22,HMGB2,ARRDC3,GCLC,PTPN6,CCL5,SERPINE1,PDE10A,PIRB,STAT1,TREML1,STXBP1,PRKCZ,BCL2,RNF43,UCHL1,CD3E,RGS2,CEACAM1,HTT,FCRL5,CCDC88C,EDN1,SIGIRR,PARP14,LFNG,BMP8A,LYN,BEND6,TNR,CD300LF,ADRB2,RASAL3,BCHE,ICAM1,CTNNA1,CLU,GDF3,SOX17,IL1R2,INPP5D,SYTL4,PR…
GO:BP	platelet aggregation	GO:0070527	0.0115337	1.93803	51	699	10	21331	SLC7A11,SYK,PLEK,PTPN6,STXBP1,CEACAM1,ALOX12,LYN,ADRB2,ITGA2B
GO:BP	sensory perception of pain	GO:0019233	0.011643	1.93394	144	699	17	21331	CTSS,TAC4,CCN3,GRIN1,PHF24,CXCL12,NOS1,KCNJ10,CACNA1B,FCGR4,CACNA1A,UCHL1,EDN1,CXCR4,ADRB2,SCN3B,CCL2
GO:BP	plasma membrane bounded cell projection morphogenesis	GO:0120039	0.0121062	1.91699	673	699	45	21331	SYT1,ACHE,PRRXL1,SEMA5B,SPTBN4,PHACTR1,ALCAM,SYT4,MAP6,EPHA5,CNTN4,GRIN1,COL25A1,SHTN1,CXCL12,MAPT,BCAN,CRMP1,CYFIP2,DCDC2A,SEMA3D,LAMA1,NYAP2,NCKAP1L,SLC23A2,TUBB2B,DST,CACNA1A,STXBP1,RAC2,PRKCZ,BCL2,CPNE9,UCHL1,LRP8,NRCAM,DPYSL5,ANK3,TLX2,TNR,CXCR4,CLU,ADCY1,DIXDC1,SEMA3E
GO:BP	T cell mediated immunity	GO:0002456	0.0121084	1.91691	101	699	14	21331	B2M,CD8A,PTPRC,SPN,IL7R,RAB27A,RSAD2,CTSC,IL18RAP,PRKCZ,CEACAM1,DPP4,ICAM1,IL18R1
GO:BP	bone remodeling	GO:0046849	0.0121084	1.91691	101	699	14	21331	CTSS,SYK,CARTPT,GREM1,TNFRSF11B,FCGR4,RAC2,LEPR,CEACAM1,GPR55,ADRB2,INPP5D,SYT7,PTK2B
GO:BP	regulation of protein metabolic process	GO:0051246	0.0122632	1.91139	2856	699	135	21331	C4B,PPP2R2B,CCL8,SPTBN4,PHACTR1,CCL12,ACER2,PPP1R1A,TRIM30A,NAIP5,BST2,CYBB,NKD2,SYK,PTPRC,TREM2,GRIN1,SAMSN1,SPN,CARTPT,GREM1,CD6,TNFSF10,SPHK1,DERL3,GPNMB,CCR1,GFAP,SPOCK1,SLFN1,NAIP2,MAPT,IDE,NOS1,ISG15,PSMB8,BMP4,CPEB1,CIRBP,FCGR1,LAX1,TLR7,CYFIP2,CTSC,FCER1A,IRAK3,ITGB2,ADAM33,LCK,CCBE1,THBS1,PTPN22,HAVCR2,SLC30A10,FBXO2,NCKAP1L,ARRDC3,GCLC,PTPN6,MLKL,PGF,FGF7,CCL5,SERPINE1,MAP3K8,KNG2,PIRB,…
GO:BP	response to ethanol	GO:0045471	0.0123227	1.90929	160	699	18	21331	ADCYAP1R1,CYBB,GRIN1,VCAM1,APOBEC1,CCL7,CYP2E1,BCL2,RGS2,SPI1,CLDN5,CD14,ALDH1A1,ADH7,SLC2A4,CCL2,ADH1,PTK2B
GO:BP	tumor necrosis factor production	GO:0032640	0.0125289	1.90209	176	699	19	21331	TRIM30A,CYBB,SYK,PTPRC,TREM2,SPN,GPNMB,IRAK3,THBS1,PTPN22,HAVCR2,CD2,PTPN6,IFIH1,FCER1G,CD14,LILRA5,CLU,CCL2
GO:BP	generation of neurons	GO:0048699	0.0126076	1.89937	1642	699	87	21331	SYT1,ACHE,PRRXL1,CBLN1,SEMA5B,SPTBN4,PHACTR1,B2M,ALCAM,TRPM1,SYT4,MAP6,NPY,EPHA5,CNTN4,SLC1A3,TREM2,GRIN1,COL25A1,SPHK1,GFAP,HHIP,SPOCK1,VCAM1,SHTN1,CXCL12,WNT6,MAPT,NOS1,BMP4,BCAN,CPEB1,CRMP1,CYFIP2,C1QA,SH3GL3,DCDC2A,SEMA3D,LAMA1,NYAP2,HMGB2,NCKAP1L,CLIC5,SLC23A2,CHD5,CCL5,TUBB2B,DST,GLDN,PBX3,CACNA1A,STXBP1,ASTN1,GPR183,RAC2,PRKCZ,BCL2,CPNE9,BMP6,UCHL1,CD3E,RGS2,LRP8,NRCAM,RORB,DPYSL5,ANK3,C3,…
GO:BP	regulation of wound healing	GO:0061041	0.0127945	1.89298	145	699	17	21331	SYK,PLEK,TSPAN8,THBS1,SERPINE1,KNG2,CEACAM1,FCER1G,ALOX12,LYN,CXCR4,ADRB2,PLA2G4A,HPSE,SYTL4,CCL2,F7
GO:BP	positive regulation of leukocyte mediated immunity	GO:0002705	0.0127945	1.89298	145	699	17	21331	B2M,SYK,PTPRC,FCGR1,RSAD2,VAV1,FCER1A,ITGB2,IL18RAP,STXBP2,STXBP1,PRKCZ,FGR,FCER1G,C3,IL18R1,CCL2
GO:BP	granulocyte activation	GO:0036230	0.0128682	1.89048	41	699	9	21331	SYK,ITGB2,IL18RAP,STXBP2,CCL5,FCGR4,ANXA3,FCER1G,CXCR2
GO:BP	response to mechanical stimulus	GO:0009612	0.0129087	1.88912	226	699	22	21331	ATP1A2,SLC1A3,SLC2A1,SLC8A1,PHF24,CXCL12,NOS1,TLR7,LCK,THBS1,GCLC,MPO,LRP11,BMP6,HTT,EDN1,NOS3,ASIC2,LHFPL5,CXCR4,CCL2,PTK2B
GO:BP	receptor-mediated endocytosis	GO:0006898	0.0129087	1.88912	226	699	22	21331	ACHE,SGIP1,B2M,SYK,GREM1,IFITM3,FCGR1,DGKD,SH3GL3,SERPINE1,RAMP1,HPCA,CEACAM1,FCER1G,C3,HAP1,CXCR2,ADRB2,MX2,CD14,CLU,LMBR1L
GO:BP	T cell activation involved in immune response	GO:0002286	0.0135291	1.86873	116	699	15	21331	IRF4,SPN,RAB27A,HAVCR2,ITGAL,LY9,GPR183,PRKCZ,CEACAM1,FCER1G,CLEC4D,ICAM1,NFKBIZ,LCP1,IL18R1
GO:BP	positive regulation of MAPK cascade	GO:0043410	0.0136683	1.86429	530	699	38	21331	CCL8,CCL12,SYK,PTPRC,TREM2,CARTPT,SPHK1,GPNMB,CCR1,BMP4,FCER1A,THBS1,PTPN22,HAVCR2,SLC30A10,MLKL,CCL5,MAP3K8,CCL7,GPR183,PRKCZ,LEPR,PROK2,CEACAM1,EDN1,GPR55,C3,NCF1,FGFBP3,PIK3R5,ADRB2,ICAM1,LILRA5,DIXDC1,PDE5A,ABCA7,CCL2,PTK2B
GO:BP	cell projection morphogenesis	GO:0048858	0.0146367	1.83456	678	699	45	21331	SYT1,ACHE,PRRXL1,SEMA5B,SPTBN4,PHACTR1,ALCAM,SYT4,MAP6,EPHA5,CNTN4,GRIN1,COL25A1,SHTN1,CXCL12,MAPT,BCAN,CRMP1,CYFIP2,DCDC2A,SEMA3D,LAMA1,NYAP2,NCKAP1L,SLC23A2,TUBB2B,DST,CACNA1A,STXBP1,RAC2,PRKCZ,BCL2,CPNE9,UCHL1,LRP8,NRCAM,DPYSL5,ANK3,TLX2,TNR,CXCR4,CLU,ADCY1,DIXDC1,SEMA3E
GO:BP	cell-matrix adhesion	GO:0007160	0.0148496	1.82828	211	699	21	21331	ACER2,MMP12,GREM1,SNED1,VCAM1,COL13A1,BCAN,ITGB7,ITGB2,MSLN,THBS1,SERPINE1,ITGAL,PRKCZ,BCL2,CD3E,ITGA2B,HPSE,SEMA3E,ITGB2L,PTK2B
GO:BP	leukocyte apoptotic process	GO:0071887	0.0150566	1.82227	117	699	15	21331	SLC7A11,CASP7,PDCD1,IL7R,CXCL12,CD3G,BMP4,CCL5,CD274,FCER1G,LYN,CXCR2,GIMAP8,IRS2,LMBR1L
GO:BP	regulation of interleukin-6 production	GO:0032675	0.0160139	1.7955	163	699	18	21331	POU2AF1,TRIM30A,AQP4,SYK,TREM2,DHX58,TLR7,IRAK3,PTPN22,HAVCR2,NCKAP1L,PTPN6,IL17RA,IFIH1,FCER1G,POU2F2,LILRA5,INPP5D
GO:BP	negative regulation of transport	GO:0051051	0.016242	1.78936	534	699	38	21331	ATP1A2,SP100,SYT4,OSR1,PRTN3,CCN3,BST2,CARTPT,DERL3,MAPT,NOS1,CORO1A,FGF12,RSAD2,SH3GL3,THBS1,CYP4F18,GCLC,CD84,FOXF1,BCL2,RGS2,CEACAM1,FCRL5,ABCG2,EDN1,NOS3,ANK3,BMP8A,CD300LF,ICAM1,IRS2,SYTL4,ABCA7,NMB,ENPP1,ENTPD1,PTK2B
GO:BP	amino acid import	GO:0043090	0.0165915	1.78011	53	699	10	21331	SLC7A11,SLC6A1,SLC6A13,SLC6A20A,SLC1A3,KCNJ10,SLC22A2,RGS2,SLC7A2,SLC1A5
GO:BP	tube development	GO:0035295	0.0167022	1.77723	1129	699	65	21331	SLC7A11,CCL12,ASS1,SP100,RNF213,OSR1,CCN3,CYBB,SYK,GREM1,C3AR1,SPHK1,MTHFD1L,HHIP,FGFBP1,CXCL12,WNT6,NRXN3,BMP4,ITGB2,CCBE1,THBS1,LAMA1,HK2,PTPN6,C6,PGF,FGF7,CCL5,SERPINE1,ANXA3,STAT1,CXCL10,FOXF1,RAMP1,GPR4,BCL2,LEPR,PROK2,GSTA3,CEACAM1,ALOX12,MYO18B,EDN1,NOS3,NRCAM,SETDB2,C3,WNT9B,SPI1,CLDN5,CXCR4,CXCR2,ADRB2,TFAP2B,SOX17,HPSE,CRLF1,KLF5,SEMA3E,CHD7,CCL2,NDNF,ITGAX,PTK2B
GO:BP	positive regulation of protein phosphorylation	GO:0001934	0.0172345	1.7636	1015	699	60	21331	CCL8,CCL12,SYK,PTPRC,TREM2,SPN,CARTPT,GREM1,CD6,SPHK1,GPNMB,CCR1,NOS1,BMP4,FCGR1,FCER1A,LCK,THBS1,PTPN22,HAVCR2,SLC30A10,NCKAP1L,MLKL,PGF,FGF7,CCL5,MAP3K8,CCL7,LCP2,GPR183,PRKCZ,BCL2,LEPR,AKAP6,BMP6,PROK2,CD3E,CEACAM1,LRP8,EDN1,GPR55,C3,PARP14,NCF1,BMP8A,FGFBP3,LYN,PIK3R5,ADRB2,ICAM1,LILRA5,CLU,GDF3,CRLF1,DIXDC1,PDE5A,ABCA7,PRNP,CCL2,PTK2B
GO:BP	lymphocyte chemotaxis	GO:0048247	0.0175646	1.75536	65	699	11	21331	CCL8,CCL12,CXCL12,CXCL13,CCL5,CCL7,CXCL10,CH25H,GPR183,CCL2,PTK2B
GO:BP	positive regulation of peptidyl-tyrosine phosphorylation	GO:0050731	0.0182042	1.73983	197	699	20	21331	SYK,PTPRC,TREM2,GREM1,FCGR1,FCER1A,LCK,FGF7,CCL5,BMP6,CD3E,LRP8,PARP14,NCF1,LYN,ICAM1,LILRA5,CRLF1,PRNP,PTK2B
GO:BP	response to peptide	GO:1901652	0.0184578	1.73382	537	699	38	21331	ASS1,CYBB,TREM2,SLC2A1,TNFSF10,VCAM1,CXCL12,NOS1,CPEB1,MGARP,CASP4,APOBEC1,PTPRN,PTPN22,SLC30A10,GCLC,CACNA1B,CACNA1A,PRKCZ,SRSF5,CEACAM1,ABCG2,EDN1,NAMPT,LYN,ABCC1,ADRB2,SERPINA3F,AANAT,ICAM1,KLF5,IRS2,PRNP,SLC2A4,ENPP1,CCL2,F7,SERPINA1B
GO:BP	interferon-gamma production	GO:0032609	0.0185796	1.73096	119	699	15	21331	SPN,ISG15,TLR7,PGLYRP1,IRF8,IL18RAP,PTPN22,HAVCR2,CD2,CD274,CD3E,CD14,IL18R1,PRNP,IL12RB1
GO:BP	regulation of apoptotic cell clearance	GO:2000425	0.0186057	1.73035	10	699	5	21331	TREM2,C3,CD300LF,ABCA7,CCL2
GO:BP	regulation of leukocyte apoptotic process	GO:2000106	0.0186524	1.72926	91	699	13	21331	SLC7A11,PDCD1,IL7R,CXCL12,CD3G,BMP4,CCL5,CD274,FCER1G,LYN,CXCR2,GIMAP8,IRS2
GO:BP	positive regulation of metabolic process	GO:0009893	0.0189197	1.72309	3868	699	172	21331	JCHAIN,ACHE,CCL8,CGA,SCD1,ADCYAP1R1,CCL12,IRF7,POU2AF1,IFI211,ACER2,ASS1,B2M,TRIM30A,OSR1,NAIP5,EPHA5,ZC3HAV1,NPR3,NLRC5,CYBB,NKD2,SYK,PTPRC,IRF4,MMP12,TREM2,GRIN1,SPN,CARTPT,GREM1,CD6,C3AR1,TNFSF10,SPHK1,GPNMB,CCR1,IL7R,LTB,CYTL1,RAB27A,WNT6,TRIM30D,MAPT,PRG2,NR6A1,NOS1,SGMS1,BMP4,CPEB1,CIRBP,DHX58,FCGR1,RSAD2,IFI204,TLR7,CASP4,CYFIP2,IKZF3,CTSC,FCER1A,APOBEC1,PTPRN,PLEK,ITGB2,IRF8,PLAC8,LCK,CCB…
GO:BP	regulation of type I interferon production	GO:0032479	0.019008	1.72106	78	699	12	21331	IRF7,ZC3HAV1,SYK,MMP12,DHX58,TLR7,PTPN22,HAVCR2,HMGB2,STAT1,IFIH1,CD14
GO:BP	inorganic cation transmembrane transport	GO:0098662	0.0190648	1.71977	750	699	48	21331	ATP1A2,SLC6A1,OTOP3,DPP6,TRPM1,OSR1,PTPRC,SLC1A3,TREM2,GRIN1,SLC8A1,KCNT1,NOS1,BMP4,CORO1A,FGF12,ITPR3,KCNJ10,TRPM6,LCK,PTPN22,SLC30A10,PTPN6,TMEM37,CACNA1B,CXCL10,CACNA1A,TRPM2,ATP2A3,HPCA,AKAP6,HTT,FCRL5,COX8B,ASIC2,ANK3,HAP1,SLC20A1,LYN,ADRB2,SCN3B,SLC9A2,CACNB2,CHD7,PRNP,KCNMB2,SLC25A28,PTK2B
GO:BP	regulation of calcium ion-dependent exocytosis	GO:0017158	0.0195348	1.70919	43	699	9	21331	SYT1,DOC2A,SYT4,CADPS,SYT10,CACNA1A,STXBP1,SYT5,SYT7
GO:BP	positive regulation of myeloid leukocyte mediated immunity	GO:0002888	0.0195348	1.70919	43	699	9	21331	SYK,FCGR1,FCER1A,ITGB2,STXBP2,STXBP1,FGR,FCER1G,C3
GO:BP	neuron differentiation	GO:0030182	0.0203827	1.69074	1468	699	79	21331	SYT1,ACHE,PRRXL1,CBLN1,SEMA5B,SPTBN4,PHACTR1,B2M,ALCAM,TRPM1,SYT4,MAP6,NPY,EPHA5,CNTN4,SLC1A3,GRIN1,COL25A1,SPHK1,GFAP,SPOCK1,VCAM1,SHTN1,CXCL12,WNT6,MAPT,BMP4,BCAN,CPEB1,CRMP1,CYFIP2,C1QA,SH3GL3,DCDC2A,SEMA3D,LAMA1,NYAP2,NCKAP1L,CLIC5,SLC23A2,CHD5,CCL5,TUBB2B,DST,GLDN,PBX3,CACNA1A,STXBP1,RAC2,PRKCZ,BCL2,CPNE9,BMP6,UCHL1,CD3E,RGS2,LRP8,NRCAM,RORB,DPYSL5,ANK3,C3,HAP1,WNT9B,LYN,BEND6,TLX2,LHFPL5,TN…
GO:BP	regulation of system process	GO:0044057	0.0204602	1.68909	623	699	42	21331	ATP1A2,CBLN1,SPTBN4,CTSS,TAC4,ABCB1A,CCN3,GRIN1,CARTPT,SPHK1,SLC8A1,NOS1,FGF12,KCNJ10,CTSC,LCK,CACNA1B,FCGR4,PBX3,BEGAIN,PRKCZ,AKAP6,BMP6,PROK2,RGS2,ABCG2,EDN1,NOS3,CHRNB4,SHISA9,ASIC2,FGFBP3,TNR,ADRB2,SCN3B,ICAM1,DOCK5,PDE5A,CXADR,CACNB2,ITGAX,PTK2B
GO:BP	neuron projection development	GO:0031175	0.0206325	1.68545	1067	699	62	21331	SYT1,ACHE,PRRXL1,SEMA5B,SPTBN4,PHACTR1,B2M,ALCAM,SYT4,MAP6,NPY,EPHA5,CNTN4,GRIN1,COL25A1,SPHK1,GFAP,SPOCK1,SHTN1,CXCL12,MAPT,BMP4,BCAN,CPEB1,CRMP1,CYFIP2,DCDC2A,SEMA3D,LAMA1,NYAP2,NCKAP1L,CLIC5,SLC23A2,TUBB2B,DST,CACNA1A,STXBP1,RAC2,PRKCZ,BCL2,CPNE9,UCHL1,CD3E,RGS2,LRP8,NRCAM,DPYSL5,ANK3,HAP1,LYN,TLX2,LHFPL5,TNR,STMN2,CXCR4,CTNNA1,CLU,ADCY1,DIXDC1,SEMA3E,NDNF,PTK2B
GO:BP	signal release from synapse	GO:0099643	0.0206701	1.68466	166	699	18	21331	SYT1,DOC2A,SYT4,CADPS,SPHK1,NRXN3,STXBP2,CACNA1B,SYT10,CACNA1A,STXBP1,SYT5,ADRB2,ADCY1,SYN2,CACNB2,SYT7,SNCG
GO:BP	neurotransmitter secretion	GO:0007269	0.0206701	1.68466	166	699	18	21331	SYT1,DOC2A,SYT4,CADPS,SPHK1,NRXN3,STXBP2,CACNA1B,SYT10,CACNA1A,STXBP1,SYT5,ADRB2,ADCY1,SYN2,CACNB2,SYT7,SNCG
GO:BP	positive regulation of phosphorus metabolic process	GO:0010562	0.0213281	1.67105	1161	699	66	21331	CCL8,ADCYAP1R1,CCL12,EPHA5,SYK,PTPRC,TREM2,SPN,CARTPT,GREM1,CD6,SPHK1,GPNMB,CCR1,NOS1,BMP4,FCGR1,FCER1A,PLEK,LCK,THBS1,PTPN22,HAVCR2,SLC30A10,NCKAP1L,MLKL,PGF,FGF7,CCL5,MAP3K8,PIRB,CCL7,LCP2,GPR183,PRKCZ,FGR,BCL2,LEPR,AKAP6,BMP6,PROK2,CD3E,CEACAM1,LRP8,EDN1,NOS3,GPR55,C3,PARP14,NCF1,BMP8A,FGFBP3,LYN,PIK3R5,ADRB2,ICAM1,LILRA5,CLU,GDF3,CRLF1,DIXDC1,PDE5A,ABCA7,PRNP,CCL2,PTK2B
GO:BP	positive regulation of phosphate metabolic process	GO:0045937	0.0213281	1.67105	1161	699	66	21331	CCL8,ADCYAP1R1,CCL12,EPHA5,SYK,PTPRC,TREM2,SPN,CARTPT,GREM1,CD6,SPHK1,GPNMB,CCR1,NOS1,BMP4,FCGR1,FCER1A,PLEK,LCK,THBS1,PTPN22,HAVCR2,SLC30A10,NCKAP1L,MLKL,PGF,FGF7,CCL5,MAP3K8,PIRB,CCL7,LCP2,GPR183,PRKCZ,FGR,BCL2,LEPR,AKAP6,BMP6,PROK2,CD3E,CEACAM1,LRP8,EDN1,NOS3,GPR55,C3,PARP14,NCF1,BMP8A,FGFBP3,LYN,PIK3R5,ADRB2,ICAM1,LILRA5,CLU,GDF3,CRLF1,DIXDC1,PDE5A,ABCA7,PRNP,CCL2,PTK2B
GO:BP	osteoclast differentiation	GO:0030316	0.0214633	1.6683	106	699	14	21331	TREM2,GPR68,CARTPT,CCR1,CCL5,GPR183,OSTM1,CEACAM1,FCER1G,GPR55,PRXL2A,CD300LF,CLEC2D,INPP5D
GO:BP	regulation of protein modification process	GO:0031399	0.0216936	1.66367	1888	699	96	21331	PPP2R2B,CCL8,SPTBN4,PHACTR1,CCL12,ACER2,PPP1R1A,SYK,PTPRC,TREM2,SAMSN1,SPN,CARTPT,GREM1,CD6,SPHK1,GPNMB,CCR1,SLFN1,MAPT,NOS1,ISG15,BMP4,FCGR1,LAX1,TLR7,FCER1A,IRAK3,ITGB2,LCK,THBS1,PTPN22,HAVCR2,SLC30A10,FBXO2,NCKAP1L,ARRDC3,GCLC,PTPN6,MLKL,PGF,FGF7,CCL5,MAP3K8,PIRB,CCL7,LCP2,CBS,CDKN2C,RAMP1,GPR183,RAC2,PRKCZ,FGR,BCL2,LEPR,AKAP6,BMP6,PROK2,UCHL1,CD3E,RGS2,CEACAM1,HTT,LRP8,CCDC88C,EDN1,GPR55,TLR1…
GO:BP	negative regulation of cell-cell adhesion	GO:0022408	0.0220986	1.65564	183	699	19	21331	ASS1,SPN,GPNMB,SLFN1,CXCL12,VSIG4,BMP4,LAX1,PTPN22,HAVCR2,PTPN6,CD274,BMP6,CEACAM1,ALOX12,TNR,ADRB2,PDE5A,PRNP
GO:BP	regulation of interleukin-4 production	GO:0032673	0.0247634	1.60619	34	699	8	21331	SYK,IRF4,PRG2,HAVCR2,ICOSL,PRKCZ,CD3E,FCER1G
GO:BP	regulation of inflammatory response	GO:0050727	0.025639	1.5911	384	699	30	21331	CTSS,CCN3,TREM2,SPN,CD6,SPHK1,USP18,ZBP1,FCGR1,CASP4,CTSC,PGLYRP1,FCER1A,CCL5,SERPINE1,FOXF1,IL17RA,GPR4,FCER1G,SLC7A2,C3,LYN,GBP5,ABCC1,ADRB2,PLA2G4A,NFKBIZ,LILRA5,IL1R2,PDE5A
GO:BP	blood circulation	GO:0008015	0.0260054	1.58494	504	699	36	21331	ATP1A2,SPTBN4,TAC4,NPY,NPR3,CARTPT,C3AR1,SLC8A1,NOS1,CYP4F18,GCLC,CACNA1B,KNG2,CBS,GPR4,AKAP6,BMP6,RGS2,CEACAM1,ALOX12,EDN1,NOS3,ASIC2,FGFBP3,NAMPT,CLDN5,CXCR4,CXCR2,ADRB2,SCN3B,ICAM1,DOCK5,PDE5A,CXADR,CACNB2,CHD7
GO:BP	type I interferon production	GO:0032606	0.0283013	1.54819	81	699	12	21331	IRF7,ZC3HAV1,SYK,MMP12,DHX58,TLR7,PTPN22,HAVCR2,HMGB2,STAT1,IFIH1,CD14
GO:BP	adult locomotory behavior	GO:0008344	0.0301121	1.52126	95	699	13	21331	ATP1A2,SPTBN4,GRIN1,CXCL12,MAPT,FGF12,KCNJ10,SEZ6L,PBX3,CACNA1A,UCHL1,CHD7,SNCG
GO:BP	myeloid dendritic cell activation	GO:0001773	0.0311845	1.50606	35	699	8	21331	IRF4,HAVCR2,PIRB,CD37,CLEC4D,SPI1,DOCK2,UBD
GO:BP	negative regulation of T cell proliferation	GO:0042130	0.0317817	1.49782	69	699	11	21331	SPN,GPNMB,SLFN1,VSIG4,BMP4,HAVCR2,PTPN6,CD274,CEACAM1,PDE5A,PRNP
GO:BP	regulation of hypersensitivity	GO:0002883	0.033189	1.47901	11	699	5	21331	SPN,FCGR1,FCER1A,FCER1G,C3
GO:BP	protein phosphorylation	GO:0006468	0.0337776	1.47137	1934	699	97	21331	CCL8,SPTBN4,CCL12,EPHA5,SYK,PTPRC,TREM2,CTSG,SAMSN1,SPN,MAPK12,CARTPT,GREM1,CD6,SPHK1,GPNMB,CCR1,SLFN1,NOS1,BMP4,FGF12,FCGR1,LAX1,TLR7,DCLK3,FCER1A,IRAK3,TRPM6,ITGB2,LCK,THBS1,LAMA1,PTPN22,HAVCR2,SLC30A10,NCKAP1L,PTPN6,MLKL,PGF,FGF7,CCL5,MAP3K8,ALPK1,CCL7,SLA,LCP2,CBS,CDKN2C,GPR183,RAC2,PRKCZ,FGR,BCL2,LEPR,AKAP6,BMP6,PROK2,UCHL1,CD3E,RGS2,CEACAM1,FLT3,HTT,LRP8,CCDC88C,EDN1,GPR55,TLR13,C3,PARP14,N…
GO:BP	release of sequestered calcium ion into cytosol	GO:0051209	0.033945	1.46922	125	699	15	21331	PTPRC,SLC8A1,CORO1A,ITPR3,LCK,PTPN6,CXCL10,TRPM2,AKAP6,HTT,FCRL5,HAP1,LYN,CHD7,PTK2B
GO:BP	nitric oxide mediated signal transduction	GO:0007263	0.034158	1.46651	26	699	7	21331	GUCY1B1,NOS1,THBS1,CBS,NOS3,PDE5A,NDNF
GO:BP	positive regulation of phosphorylation	GO:0042327	0.0344156	1.46324	1085	699	62	21331	CCL8,CCL12,EPHA5,SYK,PTPRC,TREM2,SPN,CARTPT,GREM1,CD6,SPHK1,GPNMB,CCR1,NOS1,BMP4,FCGR1,FCER1A,LCK,THBS1,PTPN22,HAVCR2,SLC30A10,NCKAP1L,MLKL,PGF,FGF7,CCL5,MAP3K8,CCL7,LCP2,GPR183,PRKCZ,FGR,BCL2,LEPR,AKAP6,BMP6,PROK2,CD3E,CEACAM1,LRP8,EDN1,GPR55,C3,PARP14,NCF1,BMP8A,FGFBP3,LYN,PIK3R5,ADRB2,ICAM1,LILRA5,CLU,GDF3,CRLF1,DIXDC1,PDE5A,ABCA7,PRNP,CCL2,PTK2B
GO:BP	amino acid import across plasma membrane	GO:0089718	0.0349575	1.45646	46	699	9	21331	SLC7A11,SLC6A13,SLC6A20A,SLC1A3,KCNJ10,SLC22A2,RGS2,SLC7A2,SLC1A5
GO:BP	glutathione transport	GO:0034635	0.0369793	1.43204	6	699	4	21331	SLC7A11,SLC22A8,SLC13A3,ABCC1
GO:BP	tripeptide transport	GO:0042939	0.0369793	1.43204	6	699	4	21331	SLC7A11,SLC22A8,SLC13A3,ABCC1
GO:BP	negative regulation of leukocyte cell-cell adhesion	GO:1903038	0.0373863	1.42729	126	699	15	21331	ASS1,SPN,GPNMB,SLFN1,CXCL12,VSIG4,BMP4,LAX1,PTPN22,HAVCR2,PTPN6,CD274,CEACAM1,PDE5A,PRNP
GO:BP	negative regulation of sequestering of calcium ion	GO:0051283	0.0373863	1.42729	126	699	15	21331	PTPRC,SLC8A1,CORO1A,ITPR3,LCK,PTPN6,CXCL10,TRPM2,AKAP6,HTT,FCRL5,HAP1,LYN,CHD7,PTK2B
GO:BP	heterotypic cell-cell adhesion	GO:0034113	0.0383106	1.41668	58	699	10	21331	PTPRC,VCAM1,ITGB7,ITGB2,LCK,CD2,GLDN,NRCAM,CXADR,ITGAX
GO:BP	regulation of platelet activation	GO:0010543	0.0389504	1.40949	36	699	8	21331	SYK,PLEK,CEACAM1,FCER1G,ALOX12,LYN,ADRB2,PLA2G4A
GO:BP	response to protozoan	GO:0001562	0.0389504	1.40949	36	699	8	21331	IRF4,SPN,GBP8,IRF8,IIGP1,CD37,GBP3,GBP9
GO:BP	MAPK cascade	GO:0000165	0.0415173	1.38177	795	699	49	21331	CCL8,CCL12,SYK,PTPRC,TREM2,MAPK12,CARTPT,SPHK1,GPNMB,CCR1,BMP4,FGF12,LAX1,FCER1A,IRAK3,THBS1,PTPN22,HAVCR2,SLC30A10,PTPN6,MLKL,CCL5,MAP3K8,CCL7,CBS,GPR183,PRKCZ,LEPR,PROK2,UCHL1,RGS2,CEACAM1,EDN1,GPR55,TLR13,C3,NCF1,FGFBP3,LYN,PIK3R5,ADRB2,ICAM1,LILRA5,DIXDC1,PDE5A,ABCA7,CCL2,MAPK11,PTK2B
GO:BP	amino acid transmembrane transport	GO:0003333	0.0423821	1.37282	98	699	13	21331	SLC7A11,SLC13A3,SLC6A13,SLC6A20A,SLC1A3,KCNJ10,SLC38A5,LRRC8D,SLC22A2,RGS2,SLC7A2,SLC7A14,SLC1A5
GO:BP	defense response to Gram-positive bacterium	GO:0050830	0.0452079	1.34479	128	699	15	21331	SCD1,B2M,NPY,CTSG,IL7R,GBP8,PGLYRP1,HAVCR2,HMGB2,GBP3,FGR,TNFSF8,NCF1,GBP9,HCK
GO:BP	regulation of sequestering of calcium ion	GO:0051282	0.0452079	1.34479	128	699	15	21331	PTPRC,SLC8A1,CORO1A,ITPR3,LCK,PTPN6,CXCL10,TRPM2,AKAP6,HTT,FCRL5,HAP1,LYN,CHD7,PTK2B
GO:BP	positive regulation of cell differentiation	GO:0045597	0.0460967	1.33633	1119	699	63	21331	SYT1,ACHE,CCL8,ABCB1A,SYT4,MAP6,SYK,PTPRC,CD53,TREM2,GRIN1,GPR68,GREM1,SPHK1,CCR1,IL7R,GFAP,SHTN1,CXCL12,MAPT,ISG15,BMP4,CPEB1,IFI204,SH3GL3,IFITM1,LCK,HMGB2,NCKAP1L,SLC23A2,CCL5,SERPINE1,TUBB2B,STAT1,PRKCZ,BCL2,CPNE9,AKAP6,BMP6,RGS2,IL2RG,CEACAM1,LRP8,EDN1,GDPD2,HAP1,LYN,BEND6,CLDN5,STMN2,CXCR4,NFKBIZ,DOCK5,CLU,GDF3,SOX17,KLF5,INPP5D,DIXDC1,PDE5A,HOXB4,NDNF,PTK2B
GO:BP	cell part morphogenesis	GO:0032990	0.0464313	1.33319	710	699	45	21331	SYT1,ACHE,PRRXL1,SEMA5B,SPTBN4,PHACTR1,ALCAM,SYT4,MAP6,EPHA5,CNTN4,GRIN1,COL25A1,SHTN1,CXCL12,MAPT,BCAN,CRMP1,CYFIP2,DCDC2A,SEMA3D,LAMA1,NYAP2,NCKAP1L,SLC23A2,TUBB2B,DST,CACNA1A,STXBP1,RAC2,PRKCZ,BCL2,CPNE9,UCHL1,LRP8,NRCAM,DPYSL5,ANK3,TLX2,TNR,CXCR4,CLU,ADCY1,DIXDC1,SEMA3E
GO:BP	regulation of synaptic plasticity	GO:0048167	0.0468357	1.32942	210	699	20	21331	SCGN,CBLN1,SYT4,GRIN1,GFAP,MAPT,NOS1,CPEB1,ITPR3,KCNJ10,PIRB,STXBP1,PRKCZ,SHISA9,TNR,ADCY1,RIN1,PRNP,SYT7,PTK2B
GO:BP	neurotransmitter uptake	GO:0001504	0.0482781	1.31625	37	699	8	21331	ATP1A2,SLC6A1,SLC6A2,GFAP,NOS1,KCNJ10,SLC22A2,SLC22A3
GO:BP	sequestering of calcium ion	GO:0051208	0.0496356	1.30421	129	699	15	21331	PTPRC,SLC8A1,CORO1A,ITPR3,LCK,PTPN6,CXCL10,TRPM2,AKAP6,HTT,FCRL5,HAP1,LYN,CHD7,PTK2B
