# Supplementary material for: The meningeal transcriptional response to traumatic brain injury and aging
Source: eLife. 2023 Jan 3;12:e81154. doi: 10.7554/eLife.81154 (PMC9810333; doi:10.7554/eLife.81154)
Supplement: Figure 6—source data 3. [file elife-81154-fig6-data3.xlsx]

## Sheet: Sheet1
	Young Sham			Aged Sham
Ighm	193.42	238.625	286.206	937.929	1274.88	1011.77
Igkc	89.2565	164.186	139.91	655.074	702.735	645.858
Ighg2b	16.7705	18.559	22.104	451.958	308.596	196.858
Jchain	22.8266	41.5884	43.9625	152.016	146.115	125.069
Igha	23.4787	25.7388	50.43	449.952	293.558	413.987
Iglc1	1.39754	1.55787	3.60214	15.2417	17.2764	12.0182
