# Supplementary material for: The meningeal transcriptional response to traumatic brain injury and aging
Source: eLife. 2023 Jan 3;12:e81154. doi: 10.7554/eLife.81154 (PMC9810333; doi:10.7554/eLife.81154)
Supplement: Figure 6—source data 5. [file elife-81154-fig6-data5.xlsx]

## Sheet: Sheet1
Young	Aged
2522	312
1343	614
1262	281
1502	314
909	401
