# Supplementary material for: The meningeal transcriptional response to traumatic brain injury and aging
Source: eLife. 2023 Jan 3;12:e81154. doi: 10.7554/eLife.81154 (PMC9810333; doi:10.7554/eLife.81154)
Supplement: Figure 6—source data 6. [file elife-81154-fig6-data6.xlsx]

## Sheet: Sheet1
	Young Sham			Aged Sham
Ifit1	23.8514	31.1574	33.5654	63.6142	65.4683	58.8892
Ifit2	24.2241	27.2966	27.2617	48.0516	47.1428	47.7523
Irf7	31.5845	35.1537	37.0857	56.1538	75.0507	77.878
Ifi211	6.1492	6.43469	8.26855	14.9209	16.9966	16.7454
Ifi213	6.89455	7.11203	6.71308	14.8406	14.5485	14.8225
Mx1	9.22379	11.5824	11.052	23.5044	27.9779	17.7068
