# Supplementary material for: The meningeal transcriptional response to traumatic brain injury and aging
Source: eLife. 2023 Jan 3;12:e81154. doi: 10.7554/eLife.81154 (PMC9810333; doi:10.7554/eLife.81154)
Supplement: Figure 7—source data 1. [file elife-81154-fig7-data1.xlsx]

## Sheet: Sheet1
source	term_name	term_id	adjusted_p_value	negative_log10_of_adjusted_p_value	term_size	query_size	intersection_size	effective_domain_size	intersections
GO:MF	protein binding	GO:0005515	2.28265e-41	40.6416	10383	1048	732	21123	WNT9A,COL4A1,COL5A2,JUP,PLEC,LRP1,ZMIZ1,SH3PXD2B,KIF1A,OGDH,DCTN1,SOD3,ELN,MMP2,SIPA1L3,AEBP1,SYNGAP1,BMP1,MMP14,CROCC,TNS1,EHD2,TINAGL1,WDR6,UBAP2,SPOCK2,TNS2,LGR6,KLHDC7A,KCNH1,PPP2R2C,PSD2,ATP1A1,SOX4,PITPNM2,TAGLN2,SLC12A4,KMT2D,KIF1C,SH3D19,SMARCA4,CDC42BPB,SLC9A3R2,PLPPR4,ARHGEF11,IGSF1,TIMP2,ARHGDIA,FURIN,MYO1D,SDK2,NOTCH3,ATP2B2,SHANK2,LTBP4,EZR,GNAT2,TRPV4,SYNPO,PHLDB1,HK1,DAB2IP,FLRT2,T…
GO:MF	binding	GO:0005488	3.29928e-30	29.4816	14952	1048	902	21123	WNT9A,COL4A1,COL5A2,JUP,PLEC,LRP1,ZMIZ1,SH3PXD2B,KIF1A,BPIFB4,OGDH,DCTN1,SOD3,BPIFB6,ELN,QSOX1,MMP2,SIPA1L3,AEBP1,SYNGAP1,SULF1,BMP1,ZFP469,MMP14,IRF2BPL,CROCC,TNS1,EHD2,TINAGL1,WDR6,UBAP2,SPOCK2,TNS2,LGR6,KLHDC7A,KCNH1,PPP2R2C,PSD2,ATP1A1,SOX4,PITPNM2,TAGLN2,SLC12A4,KMT2D,KIF1C,SH3D19,SMARCA4,CDC42BPB,GTF3C1,SLC9A3R2,PLPPR4,ARHGEF11,IGSF1,TIMP2,ARHGDIA,FURIN,MYO1D,SDK2,COLEC12,NOTCH3,ATP2B2,STEA…
GO:MF	enzyme binding	GO:0019899	4.80912e-15	14.3179	2398	1048	212	21123	JUP,LRP1,DCTN1,SYNGAP1,TNS2,KCNH1,PSD2,ATP1A1,PITPNM2,SLC12A4,SMARCA4,CDC42BPB,SLC9A3R2,ARHGEF11,TIMP2,ARHGDIA,FURIN,NOTCH3,EZR,TRPV4,DAB2IP,HSPA5,FAP,APP,ZBTB7A,HSPA8,EPS8L2,SFPQ,RAPGEF1,HDAC7,PCBP2,SPRED2,RAB11FIP3,FKBP1A,MFN2,NOTCH1,KCNH2,A2M,SYVN1,UBC,POR,TRP73,DIO2,TNKS1BP1,MAST2,GCN1,NISCH,APBA3,TRAK2,TUBB5,MTA1,PPP1R10,BC034090,POLR2A,DVL3,PKD1,ARHGAP44,MAPRE3,ENO2,GBF1,MYO1C,MIDN,NUCB1,TB…
GO:MF	actin binding	GO:0003779	2.50411e-14	13.6013	439	1048	68	21123	PLEC,CROCC,TNS1,MYO1D,EZR,TRPV4,SYNPO,MYO1E,SHANK3,EPS8L2,GAS2L1,DAG1,ACTN1,WASF2,MYH9,DBN1,ACTN4,MYO7A,WASF3,MYO1C,MYH14,MYO1B,MAP1A,PARVA,TMEM201,MYO18A,INPPL1,FLNC,DSTN,MYH11,YWHAH,BIN1,MYO5B,YWHAG,SPTB,CTTN,WIPF1,FMNL3,MYO19,BAIAP2L1,FLII,PARVB,MAP1S,PDLIM5,MYH10,MRTFA,ANXA6,GSN,P4HB,TNS4,VPS18,SNTB1,EPB41L1,CORO1C,VASH1,TMSB10,ADD1,INF2,WIPF2,MPRIP,XIRP1,LSP1,CAMSAP3,TLNRD1,MYH7,MYO16,HDGF,P…
GO:MF	cytoskeletal protein binding	GO:0008092	8.08686e-13	12.0922	982	1048	109	21123	PLEC,KIF1A,DCTN1,CROCC,TNS1,ATP1A1,KIF1C,MYO1D,EZR,TRPV4,SYNPO,MYO1E,SHANK3,DYSF,REEP2,EPS8L2,CCDC187,GAS2L1,DAG1,ACTN1,HSPH1,WASF2,MYH9,DBN1,ACTN4,MYO7A,NAV3,PDE6G,TRAK2,WASF3,DLG5,MAPRE3,MYO1C,MYH14,MYO1B,B4GALT1,CALM1,SPEF1,MAP1A,PARVA,TMEM201,MYO18A,INPPL1,MAPK8IP1,TRAK1,FLNC,DSTN,MYH11,MTCL1,BICD2,JAKMIP2,YWHAH,BIN1,VAPB,MYO5B,YWHAG,SPTB,CTTN,WIPF1,FMNL3,MYO19,BAIAP2L1,FLII,PARVB,MAP1S,PDLIM…
GO:MF	protein-containing complex binding	GO:0044877	1.40421e-12	11.8526	1453	1048	142	21123	JUP,LRP1,AEBP1,MMP14,KCNH1,SMARCA4,CDC42BPB,TIMP2,MYO1D,COLEC12,EZR,GNAT2,TRPV4,HK1,DAB2IP,HSPA5,FAP,MYO1E,APP,SHANK3,ADORA1,EPS8L2,GAS2L1,LAMA5,ACTN1,LUM,WASF2,MYH9,DBN1,ACTN4,MYO7A,FKBP1A,PEX6,FGFR1,PDE6G,SEC61A1,TNKS1BP1,GCN1,NISCH,TUBB5,WASF3,ZFP423,ENO2,MYO1C,NFE2L1,MYH14,WFS1,MYO1B,TNFRSF1A,CRB2,MAP1A,PARVA,PCSK2,TMEM201,MYO18A,HADHA,CSPG4,YBX3,DSTN,MYH11,NES,BICD2,AP2A1,SALL2,SRC,BIN1,BRD4…
GO:MF	actin filament binding	GO:0051015	9.43335e-09	8.02533	201	1048	36	21123	MYO1D,EZR,TRPV4,MYO1E,EPS8L2,GAS2L1,ACTN1,MYH9,DBN1,ACTN4,MYO7A,MYO1C,MYH14,MYO1B,TMEM201,MYO18A,DSTN,MYH11,BIN1,MYO5B,SPTB,CTTN,FMNL3,MYO19,FLII,MAP1S,MYH10,ANXA6,GSN,CORO1C,ADD1,MPRIP,CAMSAP3,MYH7,MYO16,PLS3
GO:MF	protein domain specific binding	GO:0019904	3.60884e-07	6.44263	798	1048	81	21123	SH3PXD2B,SYNGAP1,EHD2,ATP1A1,MYO1D,ATP2B2,SHANK2,EZR,TRPV4,DAB2IP,HSPA5,APP,SHANK3,HSPA8,SAMD11,DAG1,ACTN1,WASF2,MYH9,MYO7A,KCNH2,FGFR1,ATP2B3,TNKS1BP1,CARD10,TRAK2,TUBB5,PKD1,TUBA1A,NFE2L1,PMEPA1,CALM1,ZMYND8,INPPL1,TRAK1,HGS,YWHAH,SRC,VAPB,SCAF1,SH3GL1,YWHAG,WIPF1,MPP7,DLGAP1,CNTNAP1,TOM1L1,FAM189B,WBP11,MRTFA,AFAP1L2,ATP2B4,SH3BGRL2,U2AF2,SNTB1,TGM2,CTBP1,HNRNPM,EPN3,ITGA3,GRASP,RELA,HCN2,CRX,…
GO:MF	anion binding	GO:0043168	5.47889e-06	5.26131	2912	1048	209	21123	SH3PXD2B,KIF1A,OGDH,QSOX1,EHD2,PSD2,ATP1A1,PITPNM2,KIF1C,SMARCA4,CDC42BPB,ARHGDIA,MYO1D,ATP2B2,GNAT2,TRPV4,HK1,DAB2IP,ZCCHC14,PLA2G5,HSPA5,CRISPLD2,PLOD1,ITPK1,SIK3,MYO1E,APP,SEPT9,DYSF,HSPA8,HSPH1,UBA1,MYH9,MARK2,APLP1,TUBB6,MYO7A,NAV3,PEX6,MFN2,FGFR1,POR,PDE6G,ATP2B3,MAST2,COL5A3,FASN,ADAMTS15,DAPK1,EIF4G1,NISCH,CDK16,DNAH6,CNNM2,TUBB5,ALDH2,ARHGAP44,SMOC2,ADAMTS1,TUBA1A,GBF1,MYO1C,TYRO3,MYH14,…
GO:MF	GTPase binding	GO:0051020	7.16155e-06	5.14499	543	1048	59	21123	PSD2,CDC42BPB,ARHGEF11,ARHGDIA,EPS8L2,RAPGEF1,RAB11FIP3,MFN2,BC034090,DVL3,ARHGAP44,GBF1,MYO1C,NUCB1,TBC1D2,EHD1,RILP,BICD2,MCF2L,BIN1,SH3GL1,DOCK6,RAPGEFL1,FMNL3,IQSEC2,GDI1,HPS4,ARHGEF7,MICALL1,RALGDS,USP33,PKN1,PKN3,TBC1D9B,GNB3,CORO1C,GRASP,TBC1D9,TBC1D13,ULK1,SORL1,LLGL1,ELMO2,INF2,YBX1,GGA2,RAB3IP,ST5,RTKN,DVL1,BCR,IARS,DAPK3,GAS8,TBC1D10B,ARHGEF18,TSC2,RGP1,SPATA13
GO:MF	actin-dependent ATPase activity	GO:0030898	9.64634e-06	5.01564	21	1048	10	21123	MYO1D,MYO1E,MYH9,MYO7A,MYO1C,MYH14,MYO1B,MYO19,MYH10,MYH7
GO:MF	ion binding	GO:0043167	1.43688e-05	4.84258	6223	1048	389	21123	COL5A2,LRP1,ZMIZ1,SH3PXD2B,KIF1A,OGDH,SOD3,QSOX1,MMP2,AEBP1,SULF1,BMP1,MMP14,IRF2BPL,EHD2,SPOCK2,TNS2,PSD2,ATP1A1,PITPNM2,KMT2D,KIF1C,SMARCA4,CDC42BPB,TIMP2,ARHGDIA,FURIN,MYO1D,COLEC12,NOTCH3,ATP2B2,STEAP1,LTBP4,GNAT2,TRPV4,HK1,DAB2IP,ZCCHC14,PLA2G5,KLF13,HSPA5,CRISPLD2,PLOD1,ITPK1,SIK3,MYO1E,APP,ZBTB7A,SHANK3,SCUBE3,SEPT9,DYSF,HSPA8,DAG1,ACTN1,HDAC7,THBD,HSPH1,UBA1,POMGNT1,LTBP1,MYH9,MARK2,APLP1…
GO:MF	identical protein binding	GO:0042802	2.01093e-05	4.6966	2141	1048	161	21123	KIF1A,DCTN1,BMP1,EHD2,TNS2,KCNH1,NOTCH3,EZR,TRPV4,HK1,DAB2IP,FAP,APP,SHANK3,SCUBE3,SPPL2B,SFPQ,PRPH2,ACTN1,SLC31A1,MYH9,KCTD17,APLP1,ACTN4,RAB11FIP3,MYO7A,FKBP1A,MFN2,HEXIM1,NOTCH1,OXCT1,KDM5C,KCNH2,A2M,FGFR1,TRP73,MRAP2,FASN,DAPK1,EIF4G1,NISCH,HCFC1,ALDH2,ENG,ZFP423,PDIA3,ZHX2,MAPRE3,TUBA1A,ENO2,B4GALT1,TNFRSF1A,RBM10,PHC2,SYT9,NTRK2,BCL6,ALDH7A1,EHD1,MAPK8IP1,COL18A1,FLNC,HGS,RDH5,MTCL1,ADARB1,…
GO:MF	carbohydrate derivative binding	GO:0097367	2.337e-05	4.63134	2297	1048	170	21123	KIF1A,SULF1,EHD2,SPOCK2,ATP1A1,KIF1C,SMARCA4,CDC42BPB,MYO1D,ATP2B2,GNAT2,TRPV4,HK1,PLA2G5,HSPA5,CRISPLD2,ITPK1,SIK3,MYO1E,APP,SEPT9,HSPA8,ADORA1,HSPH1,UBA1,MYH9,MARK2,APLP1,ACTN4,TUBB6,MYO7A,NAV3,PEX6,MFN2,BGN,FGFR1,POR,PDE6G,ATP2B3,MAST2,COL5A3,ADAMTS15,DAPK1,EIF4G1,CDK16,DNAH6,CNNM2,TUBB5,ENG,SMOC2,ADAMTS1,TUBA1A,MYO1C,TYRO3,MYH14,MYO1B,TIE1,DALRD3,HYOU1,NTRK2,RTN4RL1,HSPA4,NPR1,MYO18A,HADHA,TM…
GO:MF	microfilament motor activity	GO:0000146	4.6791e-05	4.32984	24	1048	10	21123	MYO1D,MYO1E,MYH9,MYO7A,MYO1C,MYH14,MYO1B,MYO19,MYH10,MYH7
GO:MF	small GTPase binding	GO:0031267	0.000201479	3.69577	405	1048	45	21123	CDC42BPB,ARHGEF11,ARHGDIA,EPS8L2,RAPGEF1,RAB11FIP3,MFN2,BC034090,DVL3,ARHGAP44,MYO1C,TBC1D2,EHD1,RILP,BICD2,FMNL3,GDI1,HPS4,ARHGEF7,MICALL1,USP33,PKN1,PKN3,TBC1D9B,CORO1C,GRASP,TBC1D9,TBC1D13,ULK1,SORL1,LLGL1,ELMO2,INF2,GGA2,RAB3IP,ST5,RTKN,DVL1,BCR,DAPK3,GAS8,TBC1D10B,ARHGEF18,TSC2,RGP1
GO:MF	motor activity	GO:0003774	0.000237279	3.62474	141	1048	23	21123	KIF1A,DCTN1,KIF1C,MYO1D,MYO1E,MYH9,MYO7A,CGN,DNAH6,MYO1C,MYH14,MYO1B,MYO18A,MYH11,MYO5B,DNALI1,MYO19,PIN1,MYH10,CGNL1,MYH7,MYO16,KIF9
GO:MF	calmodulin binding	GO:0005516	0.000757378	3.12069	184	1048	26	21123	AEBP1,KCNH1,MYO1D,ATP2B2,TRPV4,MYO1E,MYH9,MYO7A,DAPK1,UBR4,MYO1C,MYH14,WFS1,MYO1B,CAMKK2,MYH10,ATP2B4,SNTB1,KCNQ4,PIK3R1,ADD1,NRGN,CAMSAP3,MYH7,TRPM4,STRN4
GO:MF	protein kinase binding	GO:0019901	0.00101845	2.99206	746	1048	67	21123	JUP,DCTN1,SYNGAP1,TNS2,KCNH1,ATP1A1,PITPNM2,SLC12A4,ARHGDIA,EZR,TRPV4,DAB2IP,HDAC7,SPRED2,TRP73,GCN1,NISCH,BC034090,PKD1,MAPRE3,PTPN23,CALM1,SASH1,PGAM1,NTRK2,NPR1,MAPK8IP1,CSPG4,AP2A1,SRC,TOB1,PHYHIP,GRB14,SUFU,ADCY6,YWHAG,ARHGEF7,PIN1,SOCS5,MAML1,TOM1L1,PDLIM5,CDH5,PKN1,ATP2B4,TAOK2,CCND3,COPB2,RELA,TNIP1,AP2A2,PRKCSH,PIK3R1,SMAD3,LLGL1,ELMO2,BAD,RHOC,MAP3K5,DVL1,GLRX3,KSR1,ADAM9,PTPRK,MAP3K12,…
GO:MF	molecular adaptor activity	GO:0060090	0.00124439	2.90504	274	1048	33	21123	JUP,SLC9A3R2,SHANK2,DAB2IP,SHANK3,SEPT9,HSPA8,GAS2L1,MYH9,HCFC1,DVL3,SASH1,MAP1A,MAPK8IP1,BICD2,AP2A1,GRB14,STON2,MPP7,AFAP1L2,VPS18,SGTA,HCN2,AP2A2,AP2M1,ZMYND10,KSR1,SEPT5,WWC1,SPSB4,NAPA,STON1,STUB1
GO:MF	extracellular matrix structural constituent	GO:0005201	0.00127505	2.89447	133	1048	21	21123	COL4A1,COL4A2,COL5A2,ELN,TINAGL1,SPOCK2,LAMA5,LUM,LTBP1,BGN,COL5A3,LAMC1,FBLN2,COL18A1,FRAS1,CRELD1,SRPX2,PCOLCE2,LAMA3,CRELD2,COL9A3
GO:MF	kinase binding	GO:0019900	0.00148014	2.8297	830	1048	72	21123	JUP,DCTN1,SYNGAP1,TNS2,KCNH1,ATP1A1,PITPNM2,SLC12A4,ARHGDIA,EZR,TRPV4,DAB2IP,HDAC7,SPRED2,TRP73,GCN1,NISCH,BC034090,POLR2A,PKD1,MAPRE3,MIDN,PTPN23,CALM1,SASH1,PGAM1,NTRK2,NPR1,MAPK8IP1,CSPG4,AP2A1,JAKMIP2,SRC,TOB1,PHYHIP,GRB14,SUFU,ADCY6,YWHAG,ARHGEF7,PIN1,SOCS5,MAML1,TOM1L1,PDLIM5,CDH5,PKN1,ATP2B4,TAOK2,CCND3,COPB2,RELA,TNIP1,AP2A2,PRKCSH,PIK3R1,SMAD3,LLGL1,ELMO2,BAD,RHOC,MAP3K5,DVL1,GLRX3,KSR1,…
GO:MF	nucleoside phosphate binding	GO:1901265	0.00162112	2.79018	2228	1048	157	21123	KIF1A,QSOX1,EHD2,ATP1A1,KIF1C,SMARCA4,CDC42BPB,MYO1D,ATP2B2,GNAT2,TRPV4,HK1,HSPA5,ITPK1,SIK3,MYO1E,SEPT9,HSPA8,HSPH1,UBA1,MYH9,MARK2,TUBB6,MYO7A,NAV3,PEX6,MFN2,FGFR1,POR,PDE6G,ATP2B3,MAST2,FASN,DAPK1,EIF4G1,CDK16,DNAH6,CNNM2,TUBB5,ALDH2,TUBA1A,MYO1C,TYRO3,MYH14,MYO1B,TIE1,DALRD3,HYOU1,NTRK2,HSPA4,NPR1,MYO18A,HADHA,EHD1,ATP2C1,UBE2Z,MAP4K4,MYH11,IRGQ,WNK2,SRC,GSPT1,LHX4,DYRK1B,ATP5B,TUBA1C,ADCY6,M…
GO:MF	nucleotide binding	GO:0000166	0.00162112	2.79018	2228	1048	157	21123	KIF1A,QSOX1,EHD2,ATP1A1,KIF1C,SMARCA4,CDC42BPB,MYO1D,ATP2B2,GNAT2,TRPV4,HK1,HSPA5,ITPK1,SIK3,MYO1E,SEPT9,HSPA8,HSPH1,UBA1,MYH9,MARK2,TUBB6,MYO7A,NAV3,PEX6,MFN2,FGFR1,POR,PDE6G,ATP2B3,MAST2,FASN,DAPK1,EIF4G1,CDK16,DNAH6,CNNM2,TUBB5,ALDH2,TUBA1A,MYO1C,TYRO3,MYH14,MYO1B,TIE1,DALRD3,HYOU1,NTRK2,HSPA4,NPR1,MYO18A,HADHA,EHD1,ATP2C1,UBE2Z,MAP4K4,MYH11,IRGQ,WNK2,SRC,GSPT1,LHX4,DYRK1B,ATP5B,TUBA1C,ADCY6,M…
GO:MF	purine ribonucleoside triphosphate binding	GO:0035639	0.00179318	2.74638	1890	1048	137	21123	KIF1A,EHD2,ATP1A1,KIF1C,SMARCA4,CDC42BPB,MYO1D,ATP2B2,GNAT2,TRPV4,HK1,HSPA5,ITPK1,SIK3,MYO1E,SEPT9,HSPA8,HSPH1,UBA1,MYH9,MARK2,TUBB6,MYO7A,NAV3,PEX6,MFN2,FGFR1,ATP2B3,MAST2,DAPK1,EIF4G1,CDK16,DNAH6,CNNM2,TUBB5,TUBA1A,MYO1C,TYRO3,MYH14,MYO1B,TIE1,DALRD3,HYOU1,NTRK2,HSPA4,NPR1,MYO18A,EHD1,ATP2C1,UBE2Z,MAP4K4,MYH11,IRGQ,WNK2,SRC,GSPT1,DYRK1B,ATP5B,TUBA1C,ADCY6,MYO5B,CAMKK2,ATP9A,MYO19,HSP90B1,AGAP3,…
GO:MF	purine nucleotide binding	GO:0017076	0.00211395	2.6749	1981	1048	142	21123	KIF1A,EHD2,ATP1A1,KIF1C,SMARCA4,CDC42BPB,MYO1D,ATP2B2,GNAT2,TRPV4,HK1,HSPA5,ITPK1,SIK3,MYO1E,SEPT9,HSPA8,HSPH1,UBA1,MYH9,MARK2,TUBB6,MYO7A,NAV3,PEX6,MFN2,FGFR1,PDE6G,ATP2B3,MAST2,DAPK1,EIF4G1,CDK16,DNAH6,CNNM2,TUBB5,TUBA1A,MYO1C,TYRO3,MYH14,MYO1B,TIE1,DALRD3,HYOU1,NTRK2,HSPA4,NPR1,MYO18A,HADHA,EHD1,ATP2C1,UBE2Z,MAP4K4,MYH11,IRGQ,WNK2,SRC,GSPT1,DYRK1B,ATP5B,TUBA1C,ADCY6,MYO5B,CAMKK2,ATP9A,MYO19,HS…
GO:MF	small molecule binding	GO:0036094	0.00222995	2.65171	2659	1048	181	21123	KIF1A,OGDH,QSOX1,EHD2,ATP1A1,KIF1C,SMARCA4,CDC42BPB,ARHGDIA,MYO1D,ATP2B2,GNAT2,TRPV4,HK1,HSPA5,PLOD1,ITPK1,SIK3,MYO1E,SEPT9,HSPA8,ADORA1,HSPH1,UBA1,MYH9,MARK2,ACTN4,TUBB6,MYO7A,NAV3,PEX6,MFN2,FGFR1,POR,GGCX,PDE6G,ATP2B3,STRA6,MAST2,FASN,DAPK1,EIF4G1,CDK16,DNAH6,CNNM2,TUBB5,ALDH2,ENG,TUBA1A,MYO1C,NFE2L1,TYRO3,MYH14,MYO1B,TIE1,DALRD3,HYOU1,NTRK2,HSPA4,NPR1,MYO18A,HADHA,EHD1,ATP2C1,UBE2Z,MAP4K4,MYH1…
GO:MF	purine ribonucleotide binding	GO:0032555	0.00242045	2.6161	1969	1048	141	21123	KIF1A,EHD2,ATP1A1,KIF1C,SMARCA4,CDC42BPB,MYO1D,ATP2B2,GNAT2,TRPV4,HK1,HSPA5,ITPK1,SIK3,MYO1E,SEPT9,HSPA8,HSPH1,UBA1,MYH9,MARK2,TUBB6,MYO7A,NAV3,PEX6,MFN2,FGFR1,PDE6G,ATP2B3,MAST2,DAPK1,EIF4G1,CDK16,DNAH6,CNNM2,TUBB5,TUBA1A,MYO1C,TYRO3,MYH14,MYO1B,TIE1,DALRD3,HYOU1,NTRK2,HSPA4,NPR1,MYO18A,HADHA,EHD1,ATP2C1,UBE2Z,MAP4K4,MYH11,IRGQ,WNK2,SRC,GSPT1,DYRK1B,ATP5B,TUBA1C,ADCY6,MYO5B,CAMKK2,ATP9A,MYO19,HS…
GO:MF	ribonucleotide binding	GO:0032553	0.00248181	2.60523	1987	1048	142	21123	KIF1A,EHD2,ATP1A1,KIF1C,SMARCA4,CDC42BPB,MYO1D,ATP2B2,GNAT2,TRPV4,HK1,HSPA5,ITPK1,SIK3,MYO1E,SEPT9,HSPA8,HSPH1,UBA1,MYH9,MARK2,TUBB6,MYO7A,NAV3,PEX6,MFN2,FGFR1,POR,PDE6G,ATP2B3,MAST2,DAPK1,EIF4G1,CDK16,DNAH6,CNNM2,TUBB5,TUBA1A,MYO1C,TYRO3,MYH14,MYO1B,TIE1,DALRD3,HYOU1,NTRK2,HSPA4,NPR1,MYO18A,HADHA,EHD1,ATP2C1,UBE2Z,MAP4K4,MYH11,IRGQ,WNK2,SRC,GSPT1,DYRK1B,ATP5B,TUBA1C,ADCY6,MYO5B,CAMKK2,ATP9A,MYO1…
GO:MF	transcription coregulator activity	GO:0003712	0.00260037	2.58496	431	1048	44	21123	JUP,ZMIZ1,AEBP1,IRF2BPL,KMT2D,SMARCA4,FAM129B,SPEN,ACTN1,HDAC7,ACTN4,PRDM16,PHF2,NOTCH1,HCFC1,MTA1,RBM14,ZFPM1,ZMYND8,PIAS3,BRD4,TOB1,SOX11,DYRK1B,BICRA,ZHX3,CBFA2T3,MAML1,MRTFA,CAMTA2,PKN1,CTBP1,ZMIZ2,CARM1,TLE2,SMARCB1,YAP1,SS18,ERF,WWC1,RALY,HDGF,MED15,MED24
GO:MF	Ras GTPase binding	GO:0017016	0.00282642	2.54876	391	1048	41	21123	CDC42BPB,ARHGEF11,ARHGDIA,EPS8L2,RAPGEF1,RAB11FIP3,MFN2,BC034090,DVL3,ARHGAP44,MYO1C,TBC1D2,EHD1,RILP,BICD2,FMNL3,GDI1,HPS4,ARHGEF7,MICALL1,USP33,PKN1,PKN3,TBC1D9B,CORO1C,TBC1D9,TBC1D13,ULK1,LLGL1,ELMO2,INF2,RAB3IP,ST5,RTKN,DVL1,BCR,DAPK3,GAS8,TBC1D10B,ARHGEF18,RGP1
GO:MF	intramolecular oxidoreductase activity, transposing S-S bonds	GO:0016864	0.00473839	2.32437	17	1048	7	21123	QSOX1,PDIA6,PDIA3,PDIA4,CRELD1,P4HB,CRELD2
GO:MF	protein disulfide isomerase activity	GO:0003756	0.00473839	2.32437	17	1048	7	21123	QSOX1,PDIA6,PDIA3,PDIA4,CRELD1,P4HB,CRELD2
GO:MF	extracellular matrix binding	GO:0050840	0.00801901	2.09588	56	1048	12	21123	ELN,TINAGL1,SPOCK2,DAG1,BGN,ADAMTS15,FBLN2,ITGA3,ITGA6,ITGA9,ADAMTS5,ADAM9
GO:MF	ATP binding	GO:0005524	0.00846327	2.07246	1524	1048	112	21123	KIF1A,EHD2,ATP1A1,KIF1C,SMARCA4,CDC42BPB,MYO1D,ATP2B2,TRPV4,HK1,HSPA5,ITPK1,SIK3,MYO1E,HSPA8,HSPH1,UBA1,MYH9,MARK2,MYO7A,NAV3,PEX6,FGFR1,ATP2B3,MAST2,DAPK1,EIF4G1,CDK16,DNAH6,CNNM2,MYO1C,TYRO3,MYH14,MYO1B,TIE1,DALRD3,HYOU1,NTRK2,HSPA4,NPR1,MYO18A,EHD1,ATP2C1,UBE2Z,MAP4K4,MYH11,WNK2,SRC,DYRK1B,ATP5B,ADCY6,MYO5B,CAMKK2,ATP9A,MYO19,HSP90B1,ACSF2,AK4,MYH10,RYK,ITPKB,DHX16,PKN1,ATP2B4,STK32A,PIP5K1B,H…
GO:MF	adenyl nucleotide binding	GO:0030554	0.0120588	1.9187	1604	1048	116	21123	KIF1A,EHD2,ATP1A1,KIF1C,SMARCA4,CDC42BPB,MYO1D,ATP2B2,TRPV4,HK1,HSPA5,ITPK1,SIK3,MYO1E,HSPA8,HSPH1,UBA1,MYH9,MARK2,MYO7A,NAV3,PEX6,FGFR1,ATP2B3,MAST2,DAPK1,EIF4G1,CDK16,DNAH6,CNNM2,MYO1C,TYRO3,MYH14,MYO1B,TIE1,DALRD3,HYOU1,NTRK2,HSPA4,NPR1,MYO18A,HADHA,EHD1,ATP2C1,UBE2Z,MAP4K4,MYH11,WNK2,SRC,DYRK1B,ATP5B,ADCY6,MYO5B,CAMKK2,ATP9A,MYO19,HSP90B1,BAG3,ACSF2,AK4,MYH10,RYK,ITPKB,DHX16,PKN1,ATP2B4,STK32…
GO:MF	adenyl ribonucleotide binding	GO:0032559	0.0141625	1.84886	1593	1048	115	21123	KIF1A,EHD2,ATP1A1,KIF1C,SMARCA4,CDC42BPB,MYO1D,ATP2B2,TRPV4,HK1,HSPA5,ITPK1,SIK3,MYO1E,HSPA8,HSPH1,UBA1,MYH9,MARK2,MYO7A,NAV3,PEX6,FGFR1,ATP2B3,MAST2,DAPK1,EIF4G1,CDK16,DNAH6,CNNM2,MYO1C,TYRO3,MYH14,MYO1B,TIE1,DALRD3,HYOU1,NTRK2,HSPA4,NPR1,MYO18A,HADHA,EHD1,ATP2C1,UBE2Z,MAP4K4,MYH11,WNK2,SRC,DYRK1B,ATP5B,ADCY6,MYO5B,CAMKK2,ATP9A,MYO19,HSP90B1,ACSF2,AK4,MYH10,RYK,ITPKB,DHX16,PKN1,ATP2B4,STK32A,PIP…
GO:MF	calcium ion binding	GO:0005509	0.014606	1.83547	716	1048	61	21123	LRP1,SULF1,BMP1,EHD2,SPOCK2,PITPNM2,NOTCH3,ATP2B2,LTBP4,PLA2G5,SCUBE3,DYSF,DAG1,ACTN1,THBD,LTBP1,ACTN4,RAB11FIP3,NOTCH1,MEGF8,SMOC2,NUCB1,PCDH12,CDHR1,CALM1,CRB2,SYT9,FBLN2,EHD1,ATP2C1,CRELD1,FSTL1,ATP5B,CAMKK2,ITPR1,NOTCH2,CDH5,CAPSL,ANXA6,SLC25A23,NOTCH4,CDH3,GSN,TUBB4A,SYT17,MGP,ADGRE5,TGM2,CLSTN3,TBC1D9B,TBC1D9,PRKCSH,CRELD2,CDH23,ENPP2,GJB2,CELSR2,EFHC1,TRPM4,PKD2,PLS3
GO:MF	molecular function regulator	GO:0098772	0.0184103	1.73494	3260	1048	209	21123	WNT9A,JUP,ZMIZ1,SH3PXD2B,SIPA1L3,AEBP1,SYNGAP1,BMP1,IRF2BPL,PPP2R2C,PSD2,SOX4,KMT2D,SMARCA4,ARHGEF11,IGSF1,TIMP2,ARHGDIA,FURIN,DAB2IP,FLRT2,KLF13,ITIH5,LYNX1,APP,ZBTB7A,EPS8L2,FAM129B,RAPGEF1,SPEN,ACTN1,HDAC7,HSPH1,SEMA4C,ACTN4,SPRED2,PTHLH,PRDM16,GTF2I,PHF2,HEXIM1,NOTCH1,FOXK1,A2M,TRP73,MRAP2,PPP1R37,SPINT2,GCN1,HCFC1,MSX1,APBA3,MTA1,PPP1R10,ZHX2,ARHGAP44,RBM14,GBF1,NFE2L1,NUCB1,TBC1D2,CRHR2,CRE…
GO:MF	protein C-terminus binding	GO:0008022	0.0199374	1.70033	233	1048	27	21123	SLC9A3R2,ATP2B2,SHANK2,EZR,SHANK3,PEX6,POLR2A,MAPRE3,MYO1C,SASH1,PIAS3,AP2A1,SRC,STIP1,SH3GL1,SIPA1,ITPR1,ATXN2,AGO2,CLIC6,SREBF2,PIK3R1,YAP1,SCAF4,KSR1,DAPK3,YWHAB
GO:MF	protein kinase C binding	GO:0005080	0.0235775	1.6275	62	1048	12	21123	TRPV4,HDAC7,BC034090,SRC,ADCY6,YWHAG,PDLIM5,PKN1,COPB2,PRKCSH,GLRX3,ADAM9
GO:MF	transcription coactivator activity	GO:0003713	0.0249485	1.60296	236	1048	27	21123	JUP,ZMIZ1,KMT2D,SMARCA4,FAM129B,ACTN1,ACTN4,PRDM16,PHF2,NOTCH1,HCFC1,MTA1,RBM14,SOX11,DYRK1B,BICRA,MAML1,MRTFA,CAMTA2,PKN1,ZMIZ2,CARM1,SMARCB1,YAP1,SS18,WWC1,MED24
GO:MF	protease binding	GO:0002020	0.0254468	1.59437	149	1048	20	21123	LRP1,TIMP2,FURIN,FAP,A2M,SYVN1,UBC,DVL3,TNFRSF1A,NTRK2,BIN1,BAG6,ATP9A,INS2,ITGA3,PSAP,HSPD1,BDKRB2,NOS1AP,OS9
GO:MF	protein-macromolecule adaptor activity	GO:0030674	0.0264059	1.5783	211	1048	25	21123	JUP,SHANK2,DAB2IP,SHANK3,HSPA8,GAS2L1,MYH9,HCFC1,DVL3,MAP1A,MAPK8IP1,BICD2,AP2A1,GRB14,STON2,AFAP1L2,VPS18,AP2A2,AP2M1,KSR1,WWC1,SPSB4,NAPA,STON1,STUB1
GO:MF	clathrin binding	GO:0030276	0.0278246	1.55557	63	1048	12	21123	LRP1,SYT9,AP2A1,STON2,TOM1L1,SYT17,EPN3,AP2A2,NSG2,SNAP91,AP2M1,STON1
GO:MF	glycosaminoglycan binding	GO:0005539	0.0414428	1.38255	204	1048	24	21123	SULF1,SPOCK2,HK1,PLA2G5,CRISPLD2,APP,APLP1,BGN,FGFR1,COL5A3,ADAMTS15,ENG,SMOC2,ADAMTS1,RTN4RL1,TMEM184A,FSTL1,PCOLCE2,ANXA6,HAPLN4,GNS,TNFAIP6,ADAMTS5,HDGF
GO:MF	ion channel binding	GO:0044325	0.0492121	1.30793	144	1048	19	21123	KCNH1,ACTN1,ACTN4,FKBP1A,PKD1,CALM1,YWHAH,SRC,SH3GL1,PACS2,ITPR1,CDH5,CHERP,PRKCSH,STAC,KCNE2,AP2M1,USP10,PKD2
