# Supplementary material for: The meningeal transcriptional response to traumatic brain injury and aging
Source: eLife. 2023 Jan 3;12:e81154. doi: 10.7554/eLife.81154 (PMC9810333; doi:10.7554/eLife.81154)
Supplement: Figure 7—source data 2. [file elife-81154-fig7-data2.xlsx]

## Sheet: Sheet1
	Young TBI			Aged TBI
Col4a1	601.026	578.5	484.465	338.136	314.974	287.096
Col4a2	446.974	416.814	382.505	273.045	251.756	236.284
Col5a2	733.712	753.334	576.538	375.126	421.433	372.281
Jup	131.937	122.634	134.834	82.6844	76.9099	70.9481
