# Supplementary material for: The meningeal transcriptional response to traumatic brain injury and aging
Source: eLife. 2023 Jan 3;12:e81154. doi: 10.7554/eLife.81154 (PMC9810333; doi:10.7554/eLife.81154)
Supplement: Figure 7—source data 3. [file elife-81154-fig7-data3.xlsx]

## Sheet: Sheet1
Col4a1			Col5a2
Young TBI	Aged TBI		Young TBI	Aged TBI
0.987379	0.837549		0.753736	0.806479
1.25267	0.681952		1.35944	0.375526
1.17311	0.76373		0.888381	0.17394
1.12652	0.448712		1.3172	0.384493
0.645621	0.923624		0.879538	0.395703
0.963147	1.03165		1.17215	0.578257
1.05578	0.68854		0.701281	0.580406
1.11011	0.371522		1.20415	0.355956
0.770533	0.730122		0.790368	0.393493
0.915122	0.447928		0.933762	0.377271
