# Supplementary material for: The meningeal transcriptional response to traumatic brain injury and aging
Source: eLife. 2023 Jan 3;12:e81154. doi: 10.7554/eLife.81154 (PMC9810333; doi:10.7554/eLife.81154)
Supplement: Figure 7—source data 4. [file elife-81154-fig7-data4.xlsx]

## Sheet: Sheet1
Activated genes unique to aged TBI
	log2FoldChange	pvalue	padj	response
Ighg2c	5.02404	0	0	Aged Activated
Ccn2	0.721514	1.83753e-17	5.52616e-15	Aged Activated
Cdh1	0.867747	7.61502e-15	1.51845e-12	Aged Activated
Gh	8.33804	9.54885e-12	1.10869e-09	Aged Activated
Dach1	0.853145	2.48217e-09	1.79273e-07	Aged Activated
Ascl1	1.39466	3.0767e-09	2.18768e-07	Aged Activated
Cnpy1	0.51105	3.57463e-09	2.4934e-07	Aged Activated
Hacd4	0.58349	5.63009e-09	3.76949e-07	Aged Activated
Slpi	1.00529	6.07885e-09	4.01138e-07	Aged Activated
Xdh	0.456044	6.46762e-09	4.22236e-07	Aged Activated
Kcne4	0.860688	1.09366e-08	6.8131e-07	Aged Activated
Apod	0.408038	2.36314e-08	1.3339e-06	Aged Activated
Igkv6.23	3.12329	3.91387e-08	2.14328e-06	Aged Activated
Fcnb	2.19182	3.99396e-08	2.16773e-06	Aged Activated
H2.Aa	0.470718	6.19331e-08	3.18253e-06	Aged Activated
Fmo2	0.693451	1.6445e-07	7.44899e-06	Aged Activated
Igkv14.126	3.80865	2.13814e-07	9.40627e-06	Aged Activated
Ppp1r3c	0.448662	2.4907e-07	1.07747e-05	Aged Activated
Igkv4.72	3.73455	2.52839e-07	1.08881e-05	Aged Activated
Efemp1	0.445599	2.67611e-07	1.13906e-05	Aged Activated
Anxa1	0.524319	3.10497e-07	1.2887e-05	Aged Activated
Car8	0.53534	3.39607e-07	1.39467e-05	Aged Activated
Espn	0.707783	3.67381e-07	1.49437e-05	Aged Activated
Chrm3	0.825806	3.74293e-07	1.51243e-05	Aged Activated
Ddx60	0.921196	3.92973e-07	1.56041e-05	Aged Activated
Nr3c2	0.554217	4.44699e-07	1.74316e-05	Aged Activated
Ighv1.54	6.39952	8.94417e-07	3.17484e-05	Aged Activated
Chil1	0.72847	1.06807e-06	3.71796e-05	Aged Activated
Psd3	0.407958	1.21313e-06	4.16757e-05	Aged Activated
Igkv8.24	2.66535	1.35098e-06	4.61522e-05	Aged Activated
Rbm25	0.324032	1.54611e-06	5.15538e-05	Aged Activated
Txnip	0.379756	1.90515e-06	6.12806e-05	Aged Activated
Igkv19.93	5.51494	1.92654e-06	6.16795e-05	Aged Activated
Epha3	0.531024	1.98957e-06	6.33658e-05	Aged Activated
Cdcp1	1.55493	2.03235e-06	6.45042e-05	Aged Activated
Fst	1.04756	2.08231e-06	6.5862e-05	Aged Activated
Fzd9	0.775048	2.27435e-06	7.09574e-05	Aged Activated
Mir99ahg	0.542042	2.39083e-06	7.44648e-05	Aged Activated
Rbm3	0.40146	2.51231e-06	7.77206e-05	Aged Activated
Cd24a	0.580577	2.5596e-06	7.90503e-05	Aged Activated
Pnck	0.453621	2.6135e-06	8.0175e-05	Aged Activated
Cntn1	0.411571	2.82095e-06	8.48367e-05	Aged Activated
Slc39a8	0.692599	2.87634e-06	8.6079e-05	Aged Activated
Parp12	0.364174	3.5416e-06	0.000103414	Aged Activated
Krt15	0.913401	3.98013e-06	0.000114087	Aged Activated
Fam135b	0.691403	4.00702e-06	0.000114678	Aged Activated
Tspo	0.378961	4.32384e-06	0.000122412	Aged Activated
B430306N03Rik	1.30483	4.34034e-06	0.000122687	Aged Activated
Sp140	0.86918	4.61701e-06	0.000129509	Aged Activated
Tspan32	1.18077	4.73326e-06	0.000132568	Aged Activated
Ighv1.75	3.29327	5.00754e-06	0.000137933	Aged Activated
Phldb2	0.373597	6.95805e-06	0.000183135	Aged Activated
Gm16028	6.1435	7.10157e-06	0.000186628	Aged Activated
Igkv17.121	3.34903	7.41682e-06	0.000194096	Aged Activated
Zc3h6	0.734911	8.06126e-06	0.000209396	Aged Activated
Igkv6.14	6.14809	1.05293e-05	0.000266938	Aged Activated
Ppl	1.05985	1.08949e-05	0.000274217	Aged Activated
Neurod1	0.395599	1.13904e-05	0.000284296	Aged Activated
Igkv13.84	3.57837	1.32133e-05	0.000321058	Aged Activated
Cebpe	1.89309	1.82041e-05	0.000421658	Aged Activated
Chrna5	2.50424	1.83202e-05	0.00042379	Aged Activated
Rspo2	1.31038	1.85274e-05	0.000427125	Aged Activated
Pfkfb3	0.495652	1.89981e-05	0.000436743	Aged Activated
Paxx	0.389583	1.96846e-05	0.000448033	Aged Activated
X2900005J15Rik	0.658247	2.1989e-05	0.000491337	Aged Activated
Htatip2	0.579326	2.26354e-05	0.000503939	Aged Activated
H2.DMb1	0.393689	2.46885e-05	0.000543058	Aged Activated
Galnt15	0.524625	2.70311e-05	0.000586152	Aged Activated
Igkv4.57	5.90809	2.71276e-05	0.000587552	Aged Activated
H2.DMa	0.429023	2.98134e-05	0.000641933	Aged Activated
Thap3	0.408769	2.99615e-05	0.000643749	Aged Activated
Pgm5	0.458117	2.99679e-05	0.000643749	Aged Activated
Wfdc21	1.67863	3.0156e-05	0.000646275	Aged Activated
Lat	0.938006	3.2589e-05	0.000684817	Aged Activated
Arr3	2.3703	3.73413e-05	0.000775794	Aged Activated
Baiap3	0.615293	3.77508e-05	0.000782529	Aged Activated
Gda	0.684985	3.9957e-05	0.000818092	Aged Activated
Amy1	0.433221	4.24573e-05	0.000857796	Aged Activated
Slc4a4	0.539247	5.06585e-05	0.00100036	Aged Activated
H2.Ob	1.02542	5.185e-05	0.00101925	Aged Activated
Fibin	0.507961	5.19306e-05	0.00101925	Aged Activated
C130074G19Rik	0.307533	5.23838e-05	0.00102607	Aged Activated
Id1	0.44369	5.56183e-05	0.00107742	Aged Activated
Serpinb1a	0.644282	5.58563e-05	0.00108089	Aged Activated
Kif26b	0.617181	5.71982e-05	0.00110381	Aged Activated
Cxcr6	1.15274	6.64934e-05	0.00125755	Aged Activated
Smc4	0.385276	6.81069e-05	0.00128409	Aged Activated
Ccdc82	0.402168	7.025e-05	0.00131907	Aged Activated
Rcsd1	0.364647	7.92365e-05	0.00145943	Aged Activated
Lgals3	0.477583	8.08037e-05	0.00148086	Aged Activated
Dcc	0.681207	8.39638e-05	0.00152809	Aged Activated
Pygl	0.479394	9.83909e-05	0.00175753	Aged Activated
Stard4	0.513409	0.000101194	0.00180036	Aged Activated
Dennd4a	0.373085	0.000105944	0.00187125	Aged Activated
Arap2	0.704209	0.000106126	0.001872	Aged Activated
Casp12	0.423909	0.000111883	0.00195476	Aged Activated
Gem	0.56667	0.000115421	0.00201082	Aged Activated
Clec14a	0.375602	0.000115987	0.00201686	Aged Activated
Capg	0.416209	0.000118231	0.00204811	Aged Activated
Kit	0.449163	0.000119527	0.00206665	Aged Activated
Kcnip3	0.506877	0.000121622	0.00209105	Aged Activated
Tnfrsf13b	0.818689	0.000122282	0.0020965	Aged Activated
Mctp1	0.756701	0.000122499	0.00209826	Aged Activated
Ighv8.12	4.49575	0.000123728	0.00211536	Aged Activated
Lacc1	0.535416	0.000124757	0.00213097	Aged Activated
Folh1	0.978583	0.000129425	0.00218426	Aged Activated
Mill2	0.327016	0.000131847	0.00221903	Aged Activated
Igkv3.1	5.25328	0.000132683	0.00222697	Aged Activated
Esm1	0.426587	0.000136906	0.00228529	Aged Activated
Tfpi	0.403172	0.000141753	0.00235762	Aged Activated
Dapl1	1.97863	0.000143477	0.00238198	Aged Activated
Slc38a2	0.302642	0.000145834	0.00241892	Aged Activated
Fbln5	0.24481	0.000153054	0.00252285	Aged Activated
Ighv1.78	3.83559	0.000155436	0.00255066	Aged Activated
Lmo2	0.321239	0.000155661	0.00255192	Aged Activated
Sema3c	0.667725	0.000158473	0.00258417	Aged Activated
Ighv1.22	2.56304	0.000163795	0.00265112	Aged Activated
Nfkbia	0.326066	0.00016645	0.00268089	Aged Activated
Pttg1	0.377814	0.000174395	0.00279639	Aged Activated
Slc38a9	0.409552	0.00017885	0.00285801	Aged Activated
Prkcb	0.379856	0.000181142	0.0028871	Aged Activated
Ighv11.2	3.72868	0.000182562	0.00289715	Aged Activated
Bst1	0.757536	0.000190727	0.0030085	Aged Activated
C2	0.688813	0.000194048	0.00305301	Aged Activated
Itga4	0.539812	0.00019618	0.00307601	Aged Activated
Adm	0.899499	0.000215016	0.00334277	Aged Activated
Slc13a5	0.895153	0.00021849	0.00338816	Aged Activated
Prxl2b	0.359575	0.000225414	0.00347789	Aged Activated
Lamb3	1.43903	0.000227002	0.00349946	Aged Activated
Edar	1.09508	0.000228478	0.00350691	Aged Activated
Tmem44	0.356685	0.000229847	0.00351965	Aged Activated
Trim25	0.352964	0.000237693	0.00361565	Aged Activated
Ighv1.52	2.80098	0.000239016	0.00362976	Aged Activated
Trim7	0.706734	0.00024622	0.00372154	Aged Activated
Zap70	1.13165	0.000254064	0.00381837	Aged Activated
Tbx18	0.544559	0.000261714	0.00391292	Aged Activated
Mgst2	1.13894	0.000263925	0.00394275	Aged Activated
Phka2	0.453676	0.000275783	0.0040791	Aged Activated
Clec2i	1.18131	0.000298423	0.00436569	Aged Activated
Blk	1.30335	0.000304357	0.00442077	Aged Activated
Dennd5b	0.422409	0.000307229	0.00445191	Aged Activated
Cd3d	1.65157	0.000323564	0.00463371	Aged Activated
Pla2r1	0.598575	0.000324248	0.00463989	Aged Activated
Prg4	0.508727	0.000354538	0.00500966	Aged Activated
Arhgap15	0.666395	0.000354705	0.00500966	Aged Activated
Sult1a1	0.399431	0.000378223	0.00529656	Aged Activated
Cd36	0.42468	0.000379393	0.00529677	Aged Activated
Lcn2	1.54337	0.000379309	0.00529677	Aged Activated
Otulinl	0.474933	0.000379219	0.00529677	Aged Activated
Slc26a7	0.389563	0.000385245	0.00536216	Aged Activated
Draxin	0.61613	0.000390104	0.00541736	Aged Activated
Cd47	0.248299	0.00039575	0.00547102	Aged Activated
Ighv10.1	4.00768	0.000411969	0.00567385	Aged Activated
Hs3st4	0.999771	0.000423276	0.00580343	Aged Activated
Pak3	0.888775	0.000459363	0.00622839	Aged Activated
Cpeb2	0.446725	0.000469418	0.0063413	Aged Activated
Camp	1.97136	0.000481675	0.00649253	Aged Activated
Zfp956	0.387954	0.000488349	0.00657282	Aged Activated
Gm49492	0.63794	0.000500474	0.0067065	Aged Activated
Ighv6.3	2.23965	0.000501596	0.00671662	Aged Activated
Sag	0.384831	0.000509737	0.00680577	Aged Activated
Cdh18	0.817214	0.000515422	0.00685672	Aged Activated
Ccdc62	0.559178	0.000531244	0.00702138	Aged Activated
Pdk1	0.39157	0.000533402	0.00704483	Aged Activated
Gm10354	2.86511	0.000558654	0.00732559	Aged Activated
Nqo1	0.496209	0.000577465	0.00752386	Aged Activated
Igkv3.4	2.03252	0.000578914	0.00753739	Aged Activated
Cdh12	0.946772	0.000585794	0.00761076	Aged Activated
Serping1	0.188517	0.000598005	0.0077295	Aged Activated
Serpinb9	0.297543	0.000599939	0.00774517	Aged Activated
Luzp2	0.813396	0.000612834	0.00787837	Aged Activated
Selenbp1	0.400919	0.000619747	0.00795053	Aged Activated
Aox1	0.401593	0.000628221	0.00803589	Aged Activated
Mir100hg	0.333016	0.000631825	0.00805478	Aged Activated
Ighv2.9.1	3.34685	0.000651761	0.00825729	Aged Activated
Uvssa	0.461242	0.000654652	0.00827676	Aged Activated
Gsta4	0.379619	0.000661098	0.00834676	Aged Activated
Slc6a7	0.36165	0.000661792	0.00834958	Aged Activated
Evi2a	0.541286	0.000662232	0.00834958	Aged Activated
Fermt3	0.334802	0.00066353	0.0083602	Aged Activated
Btnl7.ps	3.59501	0.000668543	0.00841181	Aged Activated
Zfp950	0.328013	0.000672875	0.00846051	Aged Activated
Tmem92	1.03028	0.000748061	0.00924119	Aged Activated
Dpep1	0.527808	0.000766565	0.00943801	Aged Activated
Ptprz1	0.620803	0.000778192	0.00955552	Aged Activated
Zfp979	0.566214	0.000782937	0.00960407	Aged Activated
Cma1	0.441386	0.000786006	0.00962626	Aged Activated
Sall4	1.26683	0.000791544	0.00968058	Aged Activated
Dnase2a	0.400724	0.000794569	0.0097111	Aged Activated
Lilrb4a	0.693563	0.000881266	0.0106041	Aged Activated
Ighv5.16	4.3269	0.000891098	0.0106914	Aged Activated
Celf2	0.298077	0.000898589	0.0107743	Aged Activated
Aldh3b1	0.469507	0.000900645	0.0107919	Aged Activated
Pcdhb14	0.648746	0.00092601	0.0110453	Aged Activated
Vnn1	0.657117	0.000933533	0.0111206	Aged Activated
Cd200r4	1.5271	0.000938179	0.0111614	Aged Activated
Gstm6	0.776751	0.000943851	0.0112071	Aged Activated
Grk3	0.336444	0.000949167	0.0112556	Aged Activated
Zfp987	2.93921	0.000958633	0.0113562	Aged Activated
Igkv8.30	1.84739	0.000958884	0.0113562	Aged Activated
Swap70	0.309498	0.000962155	0.0113876	Aged Activated
Trbc1	1.14255	0.000997069	0.0117402	Aged Activated
Arrdc4	0.333608	0.00100738	0.011854	Aged Activated
Gm5784	0.887654	0.00103542	0.0121528	Aged Activated
X4930581F22Rik	0.46155	0.00104521	0.0122375	Aged Activated
Impact	0.274521	0.00105518	0.0123156	Aged Activated
Kcnip2	0.85614	0.00105534	0.0123156	Aged Activated
Cybrd1	0.387584	0.00108027	0.0125269	Aged Activated
Lgmn	0.247714	0.00109808	0.0127013	Aged Activated
X4930438A08Rik	2.32201	0.00110182	0.012733	Aged Activated
Spint1	0.884826	0.00110827	0.012795	Aged Activated
Oard1	0.404954	0.00111839	0.0128956	Aged Activated
Mirt1	1.39051	0.00115267	0.0132326	Aged Activated
E330013P04Rik	0.627768	0.00117224	0.013407	Aged Activated
Ptgs2	0.539729	0.00122778	0.0139466	Aged Activated
Erbin	0.271134	0.00125482	0.0141921	Aged Activated
Marc1	0.602984	0.00125422	0.0141921	Aged Activated
Slc4a1	0.825329	0.00128258	0.0144866	Aged Activated
Arhgap9	0.454951	0.00128322	0.0144866	Aged Activated
Ncf4	0.561679	0.00130085	0.0146226	Aged Activated
Serpinb5	4.99756	0.0013361	0.0149822	Aged Activated
Thrsp	0.620238	0.00137397	0.0153302	Aged Activated
Coq8a	0.486446	0.00142565	0.0158315	Aged Activated
Cd163	0.342515	0.00143157	0.0158683	Aged Activated
Ccn1	0.768261	0.00146241	0.0161517	Aged Activated
Smim3	0.345485	0.00149013	0.0164183	Aged Activated
Tro	0.513464	0.00149137	0.0164221	Aged Activated
Arglu1	0.227291	0.0015035	0.016516	Aged Activated
Igkv12.46	3.71319	0.00151107	0.0165793	Aged Activated
Skap1	1.37271	0.00154519	0.0168428	Aged Activated
Nadk2	0.363813	0.00157103	0.0170839	Aged Activated
Id4	0.393856	0.00157663	0.0171245	Aged Activated
Ighv8.8	2.63374	0.00160421	0.0173829	Aged Activated
Hipk1	0.233928	0.00160642	0.017395	Aged Activated
Gtdc1	0.426916	0.00160817	0.017395	Aged Activated
Ighv1.12	4.07702	0.00164268	0.017716	Aged Activated
Rnd3	0.358564	0.00165111	0.0177861	Aged Activated
Sash3	0.561196	0.00165694	0.0178383	Aged Activated
Tmem132c	0.606189	0.00166657	0.0179308	Aged Activated
Slco3a1	0.354024	0.00170904	0.0183347	Aged Activated
Il10ra	0.396732	0.00172712	0.0184962	Aged Activated
Ankrd28	0.351542	0.00173012	0.0185176	Aged Activated
Epm2a	0.404638	0.00173578	0.0185564	Aged Activated
Clybl	0.369826	0.00175775	0.0187191	Aged Activated
Hps3	0.354373	0.00175814	0.0187191	Aged Activated
Eif5b	0.224381	0.00178785	0.0189585	Aged Activated
Elmod1	0.526482	0.00179773	0.0190192	Aged Activated
St14	0.807674	0.00180016	0.019034	Aged Activated
Il1r1	0.370438	0.00183749	0.0193506	Aged Activated
Pcgf5	0.516989	0.00184033	0.0193694	Aged Activated
Hmox1	0.490584	0.00184549	0.0194126	Aged Activated
Upf3b	0.288072	0.00185132	0.0194628	Aged Activated
Sell	0.79158	0.00186629	0.0195976	Aged Activated
Bhlhe40	0.355125	0.00192597	0.0201781	Aged Activated
Aloxe3	1.08755	0.00193206	0.0202189	Aged Activated
Wfdc17	0.627546	0.0019475	0.0203572	Aged Activated
Bmi1	0.286288	0.00195343	0.0204076	Aged Activated
Ppp4r1l.ps	0.280435	0.00195551	0.020408	Aged Activated
Rnase4	0.230243	0.0020048	0.0208493	Aged Activated
Cd109	0.459714	0.00204552	0.0211528	Aged Activated
Mocos	0.415192	0.00205005	0.0211638	Aged Activated
Fgd2	0.359627	0.00209858	0.021592	Aged Activated
Fhl2	0.409938	0.00211781	0.0217532	Aged Activated
Itih3	1.3849	0.0021215	0.0217546	Aged Activated
Stom	0.219722	0.00211957	0.0217546	Aged Activated
Trim63	2.52682	0.00213635	0.0218701	Aged Activated
Rxrg	0.292254	0.00215756	0.0220627	Aged Activated
St6galnac5	0.845873	0.00218412	0.0222599	Aged Activated
Gstm2	0.255427	0.00219531	0.0223614	Aged Activated
C1s1	0.291016	0.00223905	0.0226537	Aged Activated
Prkar1b	0.287226	0.00228384	0.0229945	Aged Activated
Tmem131l	0.477611	0.00230224	0.0231296	Aged Activated
Ms4a2	0.790968	0.00231486	0.0232309	Aged Activated
Gpr18	1.65697	0.00234157	0.0234476	Aged Activated
Cd300a	0.496448	0.00238127	0.0237479	Aged Activated
Use1	0.221477	0.00238766	0.0237665	Aged Activated
Ugcg	0.379111	0.00238693	0.0237665	Aged Activated
Dnajc12	0.382018	0.00240084	0.0238318	Aged Activated
Fpr2	1.3601	0.00240312	0.0238318	Aged Activated
Pla2g2d	0.548074	0.00243105	0.0240567	Aged Activated
Rgs22	0.638251	0.00243956	0.024126	Aged Activated
Hpgds	0.472432	0.00245466	0.0242361	Aged Activated
Pfn2	0.284004	0.00246225	0.024298	Aged Activated
Trem3	1.33427	0.00248491	0.0244822	Aged Activated
Ffar2	1.54455	0.00249993	0.024574	Aged Activated
Gm49760	1.01802	0.00250094	0.024574	Aged Activated
Ighv14.1	6.40244	0.00251892	0.024711	Aged Activated
Dlx4	1.41897	0.00255598	0.0249995	Aged Activated
Lamc2	0.758549	0.00255499	0.0249995	Aged Activated
Mllt3	0.331087	0.00256515	0.0250707	Aged Activated
Tk2	0.281799	0.00258699	0.0251902	Aged Activated
Lgals9	0.28621	0.0026167	0.025466	Aged Activated
Itk	0.925834	0.00265571	0.02575	Aged Activated
Pmaip1	1.07193	0.00266291	0.0258062	Aged Activated
Trnau1ap	0.314752	0.002666	0.0258225	Aged Activated
Ctse	1.02924	0.00266887	0.0258257	Aged Activated
Son	0.188126	0.00270802	0.026066	Aged Activated
Acer3	0.324684	0.00270819	0.026066	Aged Activated
Fam204a	0.318006	0.00271241	0.0260929	Aged Activated
Prkag3	1.86926	0.00274194	0.0262668	Aged Activated
Pnma2	1.02565	0.00274981	0.0263284	Aged Activated
Tipin	0.46334	0.00275826	0.0263818	Aged Activated
Pcdha1	1.73723	0.00276721	0.0264422	Aged Activated
Gm47445	0.875446	0.00276746	0.0264422	Aged Activated
Tpsb2	0.354141	0.00276987	0.0264515	Aged Activated
Ly6g	1.51569	0.0027795	0.0265296	Aged Activated
Ighv1.4	3.1064	0.00278228	0.0265423	Aged Activated
Gm45104	1.92653	0.0027938	0.0265832	Aged Activated
Foxp1	0.213835	0.00285302	0.0270567	Aged Activated
Pcsk4	0.482639	0.00287586	0.0271953	Aged Activated
Rsrp1	0.209145	0.00289945	0.0273472	Aged Activated
Lrrn4cl	0.360966	0.00289832	0.0273472	Aged Activated
Mid1ip1	0.340319	0.0029545	0.0277666	Aged Activated
Rbp4	0.593532	0.00297528	0.0279332	Aged Activated
Slc3a2	0.195909	0.00297689	0.0279341	Aged Activated
Ogfrl1	0.376411	0.00298682	0.0280129	Aged Activated
Gm15892	1.07624	0.0030047	0.0281518	Aged Activated
Apcdd1	0.398781	0.00301065	0.0281932	Aged Activated
Tpsab1	0.551376	0.00301566	0.0282257	Aged Activated
Ppbp	2.11815	0.00306042	0.0285718	Aged Activated
B3galt2	1.09725	0.00307781	0.0287048	Aged Activated
Wnt10a	1.59178	0.00311421	0.0289687	Aged Activated
Slc15a2	0.639859	0.00312656	0.0290561	Aged Activated
Marc2	0.2422	0.00317097	0.0293795	Aged Activated
Sult5a1	0.461295	0.00319347	0.0295581	Aged Activated
Gpam	0.331755	0.00320545	0.0296391	Aged Activated
X4933429O19Rik	0.603802	0.00322029	0.0297613	Aged Activated
Clec5a	0.763585	0.00323985	0.0298468	Aged Activated
Shfl	0.247055	0.00324032	0.0298468	Aged Activated
Herc3	0.39709	0.00327127	0.0300658	Aged Activated
Rspo3	0.260326	0.00330315	0.0303158	Aged Activated
Arrdc1	0.352585	0.00330343	0.0303158	Aged Activated
Egfl7	0.24263	0.0033284	0.030484	Aged Activated
Cpa3	0.43906	0.00335206	0.0306346	Aged Activated
Abca8b	0.508752	0.00335741	0.0306426	Aged Activated
Sat1	0.236298	0.00335949	0.0306464	Aged Activated
Rad50	0.318541	0.00339025	0.0308809	Aged Activated
Zfp951	0.823404	0.00341265	0.0310517	Aged Activated
Cep57	0.331559	0.00344443	0.0312812	Aged Activated
Khk	0.295356	0.00348565	0.031593	Aged Activated
Echdc2	0.286698	0.00352099	0.031819	Aged Activated
Chil3	1.57081	0.00353275	0.031904	Aged Activated
Cd69	1.58958	0.00355153	0.0320293	Aged Activated
Arhgap5	0.277919	0.003553	0.0320293	Aged Activated
Bnip3	0.522667	0.00355067	0.0320293	Aged Activated
Ubash3a	1.53865	0.00359595	0.0323371	Aged Activated
Gm21188	0.888561	0.00360345	0.0323728	Aged Activated
Ofd1	0.375105	0.00361242	0.0324375	Aged Activated
Plgrkt	0.308891	0.0036153	0.0324475	Aged Activated
Dek	0.229653	0.00364055	0.0326422	Aged Activated
Gm14027	2.25417	0.0036645	0.0328249	Aged Activated
Ctla2a	0.527558	0.00367367	0.0328909	Aged Activated
Lmo4	0.23862	0.0037148	0.0332106	Aged Activated
Gstt2	0.362248	0.00372456	0.0332653	Aged Activated
Grem2	0.667173	0.00378432	0.0336517	Aged Activated
Sltm	0.23188	0.003788	0.033668	Aged Activated
Cdk6	0.403478	0.00384428	0.0340692	Aged Activated
Gcnt1	0.574828	0.00385292	0.0341293	Aged Activated
Cdc42se2	0.257687	0.00387619	0.0343023	Aged Activated
Mbnl1	0.20794	0.00388341	0.0343331	Aged Activated
G6pdx	0.244617	0.0038973	0.0344392	Aged Activated
Olfr920	1.3121	0.00389924	0.0344399	Aged Activated
Slc17a9	0.750106	0.00394795	0.0348031	Aged Activated
Rsbn1l	0.324786	0.0039919	0.0351175	Aged Activated
Tmem71	0.866087	0.00399542	0.0351203	Aged Activated
Tmem117	0.762729	0.00399814	0.0351273	Aged Activated
BC064078	0.888131	0.00410167	0.0358651	Aged Activated
Gria1	0.294326	0.00410909	0.035913	Aged Activated
Cd28	1.37204	0.00411424	0.0359408	Aged Activated
Smpx	2.55754	0.00415833	0.0362229	Aged Activated
Ifi47	0.45711	0.00415548	0.0362229	Aged Activated
Dio3	1.42263	0.00417715	0.0363519	Aged Activated
Greb1	0.971137	0.00420222	0.0365181	Aged Activated
Wdfy4	0.374221	0.00426851	0.0369541	Aged Activated
Trac	1.09414	0.00432283	0.0373892	Aged Activated
Kcnt2	0.585016	0.00433835	0.037488	Aged Activated
Rbm24	0.632779	0.00436032	0.0376247	Aged Activated
X1700047M11Rik	0.577604	0.00438282	0.0377478	Aged Activated
Ighv14.3	4.16997	0.00440349	0.0378547	Aged Activated
Padi6	1.82713	0.00444088	0.0381263	Aged Activated
Stx8	0.381701	0.00444426	0.0381337	Aged Activated
Cd83	0.538354	0.00446472	0.0382556	Aged Activated
Fcna	1.35019	0.00448512	0.0383766	Aged Activated
Trim29	3.14593	0.00455336	0.0387722	Aged Activated
Gpr132	0.644269	0.00456332	0.0388104	Aged Activated
Nexn	0.419987	0.00457253	0.0388527	Aged Activated
Phip	0.279633	0.00467116	0.0395443	Aged Activated
Cndp2	0.239792	0.00467776	0.0395636	Aged Activated
Adgrv1	0.605902	0.00467634	0.0395636	Aged Activated
Grhl1	0.510736	0.00468949	0.0396138	Aged Activated
Hnmt	0.497283	0.00469169	0.0396138	Aged Activated
Rassf5	0.411241	0.00470852	0.0397322	Aged Activated
Pparg	0.628577	0.0047522	0.0400088	Aged Activated
Coch	0.438144	0.00474862	0.0400088	Aged Activated
Atl2	0.270833	0.0047657	0.0400929	Aged Activated
Klk14	1.65835	0.00479882	0.0403088	Aged Activated
Smyd3	0.425101	0.00484419	0.0405969	Aged Activated
Stxbp5	0.262538	0.00488205	0.0408396	Aged Activated
Saa3	1.82905	0.00489633	0.0409217	Aged Activated
Slamf6	1.31103	0.00495862	0.0413294	Aged Activated
Stag3	0.571044	0.00502215	0.0417261	Aged Activated
Cntln	0.31022	0.00502915	0.0417465	Aged Activated
Prune2	0.397476	0.00505888	0.0419553	Aged Activated
Fam180a	0.471014	0.00510846	0.04229	Aged Activated
Hpse2	0.60923	0.00512885	0.0424205	Aged Activated
Ly86	0.373709	0.00513217	0.0424289	Aged Activated
X1500011B03Rik	0.348998	0.00519765	0.0428736	Aged Activated
Cyp2d22	0.239414	0.00520498	0.0429147	Aged Activated
Mecom	0.445183	0.00522531	0.0430417	Aged Activated
Malsu1	0.519816	0.00523493	0.0430813	Aged Activated
Glipr2	0.560793	0.00525351	0.0431984	Aged Activated
Tspan13	0.226846	0.005259	0.0432242	Aged Activated
Cd79b	0.684143	0.00527034	0.043298	Aged Activated
Adpgk	0.289033	0.00528848	0.0433949	Aged Activated
Ube2l6	0.273787	0.00529008	0.0433949	Aged Activated
Car1	1.96157	0.00531228	0.0435256	Aged Activated
X5930430L01Rik	0.554307	0.00531212	0.0435256	Aged Activated
Pbld1	1.72937	0.00533428	0.0436473	Aged Activated
Acsl1	0.289685	0.00533873	0.0436643	Aged Activated
Igkv1.122	3.55287	0.00534545	0.04367	Aged Activated
Gm26902	1.53423	0.00535829	0.0437463	Aged Activated
Myo1h	1.17762	0.00539148	0.0439585	Aged Activated
Gmds	0.328721	0.00539824	0.0439941	Aged Activated
Fam49b	0.287921	0.00544309	0.0442808	Aged Activated
Sptssb	1.42533	0.00554753	0.0449711	Aged Activated
X1810010H24Rik	0.555587	0.00570552	0.0460888	Aged Activated
Fam76b	0.344326	0.00578675	0.0465809	Aged Activated
Gm15857	0.757496	0.00582744	0.0468468	Aged Activated
Ighv1.15	1.87823	0.00583054	0.0468512	Aged Activated
Icos	1.43664	0.00585337	0.0469935	Aged Activated
Vps11	0.228056	0.00588448	0.0471813	Aged Activated
Thnsl2	0.376575	0.00597566	0.0478381	Aged Activated
Cox7a2l	0.194874	0.006015	0.0481226	Aged Activated
Tmtc1	0.254029	0.00603141	0.0481909	Aged Activated
Chl1	0.545842	0.00613445	0.0488864	Aged Activated
Lin28b	1.84134	0.00613313	0.0488864	Aged Activated
Rpl22	0.178656	0.00613838	0.0488965	Aged Activated
Sh2d1b1	1.23327	0.00614398	0.0489198	Aged Activated
Aoah	0.466831	0.00617828	0.0491077	Aged Activated
Maoa	0.333134	0.00619366	0.049166	Aged Activated
Ighe	6.18451	0.00620319	0.0492076	Aged Activated
Baz2b	0.243635	0.00627813	0.0496432	Aged Activated
Malt1	0.402309	0.00633854	0.0500778	Aged Activated
Tifa	0.401552	0.00635139	0.0501361	Aged Activated
Slc35f3	0.555889	0.00639069	0.050403	Aged Activated
Dsg3	5.00764	0.0064607	0.0508458	Aged Activated
P2rx7	0.317384	0.00655335	0.0513766	Aged Activated
Pik3cg	0.445075	0.00658171	0.0515109	Aged Activated
S1pr3	0.40843	0.0065783	0.0515109	Aged Activated
Ngp	1.63756	0.00663907	0.0518644	Aged Activated
Rhoh	0.684931	0.00665945	0.0519862	Aged Activated
Cxcl16	0.281199	0.00669531	0.052183	Aged Activated
March7	0.267085	0.00669385	0.052183	Aged Activated
Cd300c2	0.419247	0.0067202	0.0522897	Aged Activated
Gm8189	1.43587	0.00672113	0.0522897	Aged Activated
Cd209d	1.15266	0.00684564	0.0530783	Aged Activated
P2ry10	1.0912	0.006843	0.0530783	Aged Activated
Tacstd2	1.54989	0.00684312	0.0530783	Aged Activated
Mcoln2	0.907415	0.00689371	0.0532934	Aged Activated
Herc6	0.484918	0.00689904	0.0533121	Aged Activated
Zfas1	0.398133	0.00699034	0.0538815	Aged Activated
Ms4a7	0.382868	0.0071309	0.0547615	Aged Activated
Nyx	0.644068	0.00719322	0.0551901	Aged Activated
Gstm5	0.261074	0.00723114	0.0554347	Aged Activated
Dazap2	0.196999	0.00724164	0.055492	Aged Activated
H2.M2	1.73436	0.00725491	0.0555647	Aged Activated
March6	0.203677	0.00727819	0.0556791	Aged Activated
Unc80	0.292761	0.00729118	0.0557319	Aged Activated
Tyrobp	0.273849	0.00737026	0.0561726	Aged Activated
Smyd4	0.355431	0.00743895	0.0565552	Aged Activated
Mmp25	0.82178	0.00751705	0.0570315	Aged Activated
Gm7061	1.71671	0.00751715	0.0570315	Aged Activated
Ptpn3	0.404667	0.00754622	0.0572283	Aged Activated
BC023105	1.6868	0.0075573	0.0572845	Aged Activated
Polr3gl	0.25823	0.00769499	0.0582122	Aged Activated
Gm47015	1.72755	0.00771861	0.0583188	Aged Activated
X3110021N24Rik	2.01558	0.00775363	0.058463	Aged Activated
Hcar1	0.430825	0.00785428	0.0590519	Aged Activated
Commd3	0.280225	0.0078675	0.0591271	Aged Activated
Nemf	0.23061	0.0078997	0.0593448	Aged Activated
Diras2	0.213581	0.00794784	0.0596406	Aged Activated
Ablim2	0.675274	0.00802946	0.0601964	Aged Activated
Cacna1e	0.879168	0.00803579	0.0602192	Aged Activated
Rgs9	0.57245	0.00814987	0.0608752	Aged Activated
Milr1	0.653836	0.00814668	0.0608752	Aged Activated
Lhx8	0.985341	0.00815844	0.0609143	Aged Activated
Fmo4	0.889988	0.0082384	0.0612878	Aged Activated
Zfp945	0.38312	0.00825696	0.0614	Aged Activated
Rpl30	0.241062	0.00826842	0.0614355	Aged Activated
Trim12a	0.349709	0.00837149	0.0621761	Aged Activated
Ccr7	0.916435	0.00838439	0.0621964	Aged Activated
Hs3st1	0.282333	0.00838049	0.0621964	Aged Activated
Sirpb1a	1.01152	0.00844855	0.062647	Aged Activated
Epsti1	0.435172	0.00851589	0.063019	Aged Activated
Atp13a3	0.230077	0.00855752	0.063225	Aged Activated
Tm4sf1	0.229529	0.00861566	0.0636033	Aged Activated
Padi3	2.32756	0.00865336	0.0637534	Aged Activated
Ankra2	0.317556	0.00867867	0.0638292	Aged Activated
Pls1	0.517139	0.00869824	0.06393	Aged Activated
Rgs14	0.627828	0.00881329	0.0646202	Aged Activated
Gm765	0.651625	0.00883997	0.0647641	Aged Activated
Nmnat3	0.472606	0.00888907	0.0650718	Aged Activated
Trgc2	1.99829	0.00890984	0.0651199	Aged Activated
Fads2b	1.78868	0.00893891	0.0652394	Aged Activated
Xist	1.30409	0.00893498	0.0652394	Aged Activated
Lmntd1	1.05575	0.0089637	0.0653573	Aged Activated
Rpl12	0.165665	0.00899004	0.0654714	Aged Activated
Prpf40a	0.22971	0.00899585	0.0654876	Aged Activated
Slx1b	0.352234	0.00906518	0.0658878	Aged Activated
Thsd7a	0.380059	0.00909597	0.0660069	Aged Activated
Rps6ka1	0.308327	0.00920754	0.0666381	Aged Activated
Gm26813	1.01044	0.00928197	0.0670913	Aged Activated
Fam217a	0.900648	0.00935656	0.0674974	Aged Activated
Arid4b	0.251667	0.00940718	0.0677561	Aged Activated
Wnt4	0.632192	0.00944745	0.0678643	Aged Activated
X4933439C10Rik	0.325779	0.00944664	0.0678643	Aged Activated
Pkp3	0.848106	0.0095298	0.0683878	Aged Activated
Mrps9	0.303671	0.00953504	0.0683878	Aged Activated
Ppp1r12b	0.248722	0.00953589	0.0683878	Aged Activated
Bhlhe41	0.341124	0.0095898	0.068667	Aged Activated
Uba7	0.223942	0.0095946	0.0686746	Aged Activated
Pcdh17	0.540942	0.00963992	0.0688915	Aged Activated
Ppp1r14c	1.17036	0.00967685	0.0691083	Aged Activated
Mtx3	0.289173	0.00976554	0.0695994	Aged Activated
Slfn10.ps	1.20688	0.00978385	0.0696217	Aged Activated
X9930014A18Rik	0.769986	0.0097836	0.0696217	Aged Activated
Rnf144b	0.3711	0.00983637	0.0699141	Aged Activated
Pafah1b3	0.363239	0.00987396	0.0701541	Aged Activated
Clec4n	0.483067	0.00990159	0.0703231	Aged Activated
Ptbp3	0.229274	0.00992195	0.0703941	Aged Activated
Mtmr14	0.306991	0.0100154	0.070856	Aged Activated
Hsf2bp	1.13089	0.0100373	0.0709301	Aged Activated
Plin2	0.293721	0.0100566	0.0709873	Aged Activated
Pilra	0.756317	0.0100553	0.0709873	Aged Activated
Cxcr3	0.774202	0.010057	0.0709873	Aged Activated
Zan	0.552477	0.0100919	0.0711516	Aged Activated
Irs1	0.32611	0.010257	0.0721766	Aged Activated
Zcchc18	0.261179	0.0102872	0.0723339	Aged Activated
Eif3e	0.20636	0.0102988	0.0723875	Aged Activated
Ltb4r1	0.842756	0.0103086	0.0724079	Aged Activated
B3galt1	0.607604	0.0103154	0.0724208	Aged Activated
Tlr1	0.50087	0.010355	0.0726156	Aged Activated
Igkv4.70	3.67854	0.0103713	0.0726741	Aged Activated
F830016B08Rik	1.43371	0.0103697	0.0726741	Aged Activated
Gm45828	1.74338	0.0104492	0.0731366	Aged Activated
Zmat1	0.333633	0.0105252	0.0735564	Aged Activated
Myb	0.817146	0.0105492	0.0736727	Aged Activated
Zfp943	0.382522	0.0105746	0.0737892	Aged Activated
A230057D06Rik	0.651637	0.0105718	0.0737892	Aged Activated
Tacc1	0.195012	0.0107078	0.074548	Aged Activated
C1qtnf7	0.398736	0.0107185	0.0745667	Aged Activated
Clip4	0.227245	0.0107297	0.0745857	Aged Activated
Pld4	0.288185	0.0110165	0.0760911	Aged Activated
Stap1	0.697183	0.0110815	0.0763447	Aged Activated
Dennd2d	0.665424	0.0111194	0.0765709	Aged Activated
Zik1	0.610884	0.011147	0.0767323	Aged Activated
Pacsin3	0.24436	0.0111967	0.0769617	Aged Activated
Hs3st3b1	0.789178	0.0111971	0.0769617	Aged Activated
Acad10	0.262716	0.011217	0.0770694	Aged Activated
Fcho1	0.453954	0.0113255	0.0776119	Aged Activated
Chst15	0.266661	0.0114767	0.0783738	Aged Activated
Mipol1	0.581117	0.0115287	0.0785642	Aged Activated
Klk8	0.86062	0.0115676	0.0787701	Aged Activated
Creg1	0.257356	0.0116389	0.0791676	Aged Activated
Ccz1	0.260101	0.0116801	0.0794187	Aged Activated
Fyb	0.345214	0.0116906	0.0794606	Aged Activated
Gyg	0.268666	0.0117443	0.0797662	Aged Activated
Gask1b	0.269077	0.0118198	0.0801902	Aged Activated
Ighv7.3	1.7478	0.0118687	0.0804497	Aged Activated
Kif4	0.857482	0.0119022	0.0805291	Aged Activated
Crlf3	0.261873	0.0119316	0.08068	Aged Activated
Rims3	0.345104	0.0119591	0.0807893	Aged Activated
Alx3	0.484729	0.0119807	0.0808632	Aged Activated
Itm2c	0.140355	0.0120672	0.0812678	Aged Activated
Fabp5	0.578123	0.012073	0.0812765	Aged Activated
Rps6ka5	0.34531	0.012132	0.0816441	Aged Activated
Nctc1	3.17775	0.012386	0.0831397	Aged Activated
Myom1	0.356767	0.0124732	0.083603	Aged Activated
AB124611	0.464064	0.0124968	0.0836691	Aged Activated
Gpr156	0.533063	0.0125327	0.0838177	Aged Activated
Vsx1	0.57524	0.0126286	0.0842749	Aged Activated
Fabp4	0.286167	0.0126623	0.0843903	Aged Activated
Adgrl2	0.27873	0.0126943	0.0845555	Aged Activated
Naaa	0.197167	0.0127777	0.084899	Aged Activated
Rps19	0.162357	0.0129505	0.0858917	Aged Activated
Ppcdc	0.324815	0.0129944	0.0860581	Aged Activated
Gm47173	1.68448	0.0129859	0.0860581	Aged Activated
Acpp	0.418508	0.0130449	0.0862995	Aged Activated
Pdgfd	0.199453	0.0130611	0.0863447	Aged Activated
Srgn	0.205355	0.0130975	0.0864937	Aged Activated
Ppp2r3a	0.315231	0.0130978	0.0864937	Aged Activated
Crebrf	0.275842	0.0131097	0.0865413	Aged Activated
Gbgt1	0.430755	0.0132217	0.0871352	Aged Activated
Zfp981	0.935574	0.013379	0.0879706	Aged Activated
Trim12c	0.307767	0.0135254	0.0887744	Aged Activated
Arl4c	0.303947	0.0135538	0.0889289	Aged Activated
Dok3	0.374235	0.0135992	0.0891308	Aged Activated
Wdr31	0.476613	0.0136087	0.0891612	Aged Activated
Nrxn2	0.305078	0.0136186	0.0891943	Aged Activated
Siglech	0.569512	0.0136306	0.0892226	Aged Activated
Gbp7	0.308618	0.0136746	0.0894018	Aged Activated
Ryr2	0.311829	0.0136986	0.0894946	Aged Activated
Pkhd1l1	0.821484	0.0136977	0.0894946	Aged Activated
Rbm7	0.224906	0.0138224	0.0901443	Aged Activated
Plk3	0.541915	0.0138478	0.0902446	Aged Activated
Rpl14	0.161947	0.0138988	0.0904806	Aged Activated
Mcpt4	0.552408	0.0139367	0.0906947	Aged Activated
H2.Q2	2.09174	0.0139705	0.0908192	Aged Activated
Vps13a	0.270865	0.0140625	0.0913512	Aged Activated
Rasgrp1	0.689324	0.0143116	0.0927069	Aged Activated
Lgals4	0.339626	0.0143354	0.0927497	Aged Activated
Scrt1	0.87577	0.0144239	0.0931058	Aged Activated
Neurod4	0.223164	0.0144565	0.0932235	Aged Activated
Lurap1l	0.349155	0.0145073	0.0934498	Aged Activated
Tlr3	0.370547	0.0145407	0.0936214	Aged Activated
S100a14	2.13998	0.0146135	0.0938672	Aged Activated
Gimap1	0.39532	0.0146374	0.0939222	Aged Activated
Smpdl3b	0.518212	0.0146514	0.0939462	Aged Activated
Gprasp2	0.23978	0.0146897	0.0941261	Aged Activated
Klk10	1.37637	0.014704	0.0941361	Aged Activated
Rpl3	0.142483	0.0147118	0.0941361	Aged Activated
Padi4	0.904155	0.0147501	0.0942262	Aged Activated
Kdm5a	0.225719	0.0147613	0.0942262	Aged Activated
Lyz1	0.925298	0.0147864	0.0943382	Aged Activated
Sgk1	0.21686	0.0148783	0.0948043	Aged Activated
Cryzl2	0.335696	0.0149018	0.0949215	Aged Activated
Pde9a	0.462491	0.0149476	0.0951137	Aged Activated
Cplx2	0.258899	0.0151018	0.0958954	Aged Activated
Nxpe5	0.621986	0.015229	0.096536	Aged Activated
Treml2	0.793979	0.0152515	0.0966171	Aged Activated
Eif2ak2	0.300585	0.0152696	0.0966933	Aged Activated
S100a8	1.45207	0.0153077	0.0968343	Aged Activated
Tmpo	0.199478	0.0153752	0.0970603	Aged Activated
Cst7	0.998786	0.0153642	0.0970603	Aged Activated
Ms4a4a	0.522436	0.0154088	0.0972389	Aged Activated
Il13ra1	0.273688	0.0154379	0.0973561	Aged Activated
Ccl6	0.309772	0.0155095	0.0976871	Aged Activated
Mad2l2	0.323569	0.0155117	0.0976871	Aged Activated
Zfp984	0.508872	0.0155713	0.0979637	Aged Activated
Mtdh	0.187137	0.0156163	0.0981774	Aged Activated
Catsperz	1.55422	0.0156512	0.0983632	Aged Activated
Xpa	0.393861	0.0156996	0.0985995	Aged Activated
Plbd1	0.342784	0.0157558	0.0988489	Aged Activated
Zdhhc20	0.216861	0.0158554	0.0993062	Aged Activated
Acot7	0.268836	0.0158516	0.0993062	Aged Activated
Muc20	2.17079	0.015922	0.0996549	Aged Activated
Snn	0.24565	0.0159277	0.0996569	Aged Activated
Padi1	0.547178	0.0159972	0.0999892	Aged Activated
Rbbp6	0.179992	0.0160028	0.0999904	Aged Activated
Wnt9a	-0.583252	1.16072e-05	0.000288529	Aged Repressed
Col4a1	-0.91241	9.22089e-25	6.26508e-22	Aged Repressed
Col4a2	-0.800422	2.32387e-23	1.52255e-20	Aged Repressed
Col5a2	-0.909067	1.80351e-22	9.45295e-20	Aged Repressed
Jup	-0.842391	3.23693e-21	1.55034e-18	Aged Repressed
Plec	-0.612018	1.16183e-18	4.34974e-16	Aged Repressed
Lrp1	-0.543342	1.61253e-18	5.80037e-16	Aged Repressed
Zmiz1	-0.678534	6.47899e-16	1.58476e-13	Aged Repressed
Gdpd5	-0.592112	1.30381e-15	3.06646e-13	Aged Repressed
Sh3pxd2b	-0.753759	6.25664e-15	1.3043e-12	Aged Repressed
Shisal1	-1.1042	7.3355e-15	1.47879e-12	Aged Repressed
Kif1a	-0.797555	1.46851e-14	2.83576e-12	Aged Repressed
Bpifb4	-2.52716	2.96475e-14	5.38498e-12	Aged Repressed
Ogdh	-0.486669	1.90867e-13	3.09863e-11	Aged Repressed
Dctn1	-0.454829	4.0983e-13	6.31793e-11	Aged Repressed
Sod3	-0.677363	5.71513e-13	8.6648e-11	Aged Repressed
Bpifb6	-3.00356	6.07693e-13	8.97477e-11	Aged Repressed
Eln	-0.52208	7.47366e-13	1.07956e-10	Aged Repressed
Qsox1	-0.505467	9.57198e-13	1.37186e-10	Aged Repressed
Mmp2	-0.693243	1.07074e-12	1.51098e-10	Aged Repressed
Sipa1l3	-0.943739	1.22889e-12	1.69503e-10	Aged Repressed
Aebp1	-0.421384	1.35936e-12	1.84783e-10	Aged Repressed
Syngap1	-0.5826	7.28335e-12	8.67618e-10	Aged Repressed
Fads3	-0.662921	8.2118e-12	9.71906e-10	Aged Repressed
Sulf1	-0.508595	1.84494e-11	2.02667e-09	Aged Repressed
Bmp1	-0.451556	2.42297e-11	2.58427e-09	Aged Repressed
Zfp469	-1.19583	2.68625e-11	2.78414e-09	Aged Repressed
Prdm16os	-1.63961	4.84739e-11	4.78093e-09	Aged Repressed
Mmp14	-0.737519	1.10562e-10	1.00409e-08	Aged Repressed
Irf2bpl	-0.523908	1.82268e-10	1.59986e-08	Aged Repressed
Tmem184b	-0.497206	1.86655e-10	1.63056e-08	Aged Repressed
Crocc	-0.450516	2.01116e-10	1.74032e-08	Aged Repressed
Tns1	-0.421336	3.67697e-10	3.09422e-08	Aged Repressed
Ehd2	-0.447253	6.01249e-10	4.8805e-08	Aged Repressed
Tinagl1	-0.528632	6.20363e-10	5.01346e-08	Aged Repressed
Wdr6	-0.445239	6.75216e-10	5.40692e-08	Aged Repressed
Ubap2	-0.55318	7.87412e-10	6.22632e-08	Aged Repressed
Spock2	-0.518325	1.24886e-09	9.6262e-08	Aged Repressed
Tns2	-0.38472	1.43256e-09	1.09501e-07	Aged Repressed
Lgr6	-1.29288	2.15496e-09	1.59406e-07	Aged Repressed
Klhdc7a	-1.36288	2.25556e-09	1.65513e-07	Aged Repressed
Kcnh1	-1.25832	2.31938e-09	1.68846e-07	Aged Repressed
Ppp2r2c	-0.814785	2.53965e-09	1.82705e-07	Aged Repressed
Psd2	-1.02291	4.1296e-09	2.83736e-07	Aged Repressed
Cmklr1	-0.653231	5.79776e-09	3.86763e-07	Aged Repressed
Atp1a1	-0.384349	5.85955e-09	3.89469e-07	Aged Repressed
Sox4	-0.680818	5.90221e-09	3.90888e-07	Aged Repressed
Pitpnm2	-0.496344	6.28051e-09	4.12961e-07	Aged Repressed
AI506816	-0.619957	6.78967e-09	4.4169e-07	Aged Repressed
Tagln2	-0.452153	7.09789e-09	4.60109e-07	Aged Repressed
Slc12a4	-0.534511	7.56557e-09	4.85281e-07	Aged Repressed
Kmt2d	-0.369416	7.67132e-09	4.90349e-07	Aged Repressed
Kif1c	-0.423946	7.80258e-09	4.97008e-07	Aged Repressed
Sh3d19	-0.632913	8.48226e-09	5.38433e-07	Aged Repressed
Smarca4	-0.400892	9.1627e-09	5.7962e-07	Aged Repressed
Cdc42bpb	-0.452372	1.04585e-08	6.57057e-07	Aged Repressed
Gtf3c1	-0.392029	1.1649e-08	7.17117e-07	Aged Repressed
Slc9a3r2	-0.465868	1.22626e-08	7.52366e-07	Aged Repressed
Plppr4	-1.34982	1.49211e-08	8.80152e-07	Aged Repressed
Arhgef11	-0.499305	1.58127e-08	9.26788e-07	Aged Repressed
Igsf1	-1.71619	1.7108e-08	9.87422e-07	Aged Repressed
Timp2	-0.307685	2.06585e-08	1.18062e-06	Aged Repressed
Arhgdia	-0.356391	2.20715e-08	1.2497e-06	Aged Repressed
Furin	-0.506079	2.38783e-08	1.3437e-06	Aged Repressed
Slc29a1	-0.43365	2.57796e-08	1.44185e-06	Aged Repressed
Myo1d	-0.481762	2.84816e-08	1.58813e-06	Aged Repressed
Sdk2	-0.889177	3.04931e-08	1.69514e-06	Aged Repressed
Colec12	-0.494421	3.54101e-08	1.95662e-06	Aged Repressed
Emp1	-0.514541	3.58101e-08	1.97278e-06	Aged Repressed
Notch3	-0.442676	4.13248e-08	2.23629e-06	Aged Repressed
Atp2b2	-1.00347	4.65959e-08	2.50675e-06	Aged Repressed
Steap1	-1.73515	5.01587e-08	2.66509e-06	Aged Repressed
Shank2	-0.672434	5.0143e-08	2.66509e-06	Aged Repressed
Ltbp4	-0.392566	5.34743e-08	2.82705e-06	Aged Repressed
Ezr	-0.530943	5.61788e-08	2.94457e-06	Aged Repressed
Gnat2	-0.597804	7.32168e-08	3.71041e-06	Aged Repressed
Trpv4	-0.804975	7.30315e-08	3.71041e-06	Aged Repressed
Synpo	-0.422261	7.54552e-08	3.81329e-06	Aged Repressed
Phldb1	-0.381236	7.92509e-08	3.98317e-06	Aged Repressed
Hk1	-0.34135	8.50833e-08	4.22995e-06	Aged Repressed
Dab2ip	-0.427752	9.40406e-08	4.66263e-06	Aged Repressed
Zcchc14	-0.385603	1.01326e-07	4.97011e-06	Aged Repressed
Flrt2	-0.424126	1.03652e-07	5.07065e-06	Aged Repressed
Pla2g5	-0.772468	1.06209e-07	5.15448e-06	Aged Repressed
Tcf7l1	-0.717717	1.07053e-07	5.16811e-06	Aged Repressed
Hdlbp	-0.340537	1.09839e-07	5.27487e-06	Aged Repressed
Klf13	-0.432114	1.15911e-07	5.52307e-06	Aged Repressed
Hspa5	-0.47396	1.1723e-07	5.57147e-06	Aged Repressed
Crispld2	-0.490098	1.19065e-07	5.63757e-06	Aged Repressed
Plod1	-0.378986	1.33447e-07	6.24513e-06	Aged Repressed
Podnl1	-0.84217	1.34707e-07	6.28806e-06	Aged Repressed
X2900026A02Rik	-0.489454	1.36018e-07	6.33314e-06	Aged Repressed
Itih5	-0.496845	1.44348e-07	6.65343e-06	Aged Repressed
Itpk1	-0.472808	2.24215e-07	9.81674e-06	Aged Repressed
Tmem108	-2.18978	2.28924e-07	9.99905e-06	Aged Repressed
Ripor1	-0.434385	2.3484e-07	1.02331e-05	Aged Repressed
Fap	-0.644182	2.40919e-07	1.04484e-05	Aged Repressed
Sik3	-0.412758	2.49618e-07	1.07747e-05	Aged Repressed
Ptpru	-0.429509	2.53815e-07	1.09045e-05	Aged Repressed
Cmip	-0.425	2.78929e-07	1.17631e-05	Aged Repressed
Myo1e	-0.51708	3.07318e-07	1.2784e-05	Aged Repressed
Lynx1	-0.444015	3.18635e-07	1.31652e-05	Aged Repressed
App	-0.298961	3.8998e-07	1.55188e-05	Aged Repressed
Zbtb7a	-0.401249	4.28546e-07	1.68706e-05	Aged Repressed
Gse1	-0.521978	4.36968e-07	1.71653e-05	Aged Repressed
Shank3	-0.417056	4.50364e-07	1.7616e-05	Aged Repressed
Scube3	-0.822995	4.7155e-07	1.84055e-05	Aged Repressed
Sept9	-0.416927	4.80934e-07	1.87319e-05	Aged Repressed
Kazn	-0.573312	4.95491e-07	1.90962e-05	Aged Repressed
Wbp1l	-0.37229	4.96549e-07	1.90968e-05	Aged Repressed
Dysf	-0.633478	5.14818e-07	1.96757e-05	Aged Repressed
Reep2	-0.784362	5.59604e-07	2.12106e-05	Aged Repressed
Hspa8	-0.326451	5.81324e-07	2.19432e-05	Aged Repressed
Adora1	-0.574759	6.05138e-07	2.27727e-05	Aged Repressed
Eps8l2	-0.826298	6.3089e-07	2.3476e-05	Aged Repressed
Elovl7	-1.05866	6.6595e-07	2.45812e-05	Aged Repressed
Kcnj13	-1.74026	7.31425e-07	2.6623e-05	Aged Repressed
Samd11	-0.582493	7.89576e-07	2.85133e-05	Aged Repressed
Piezo1	-0.430975	8.28106e-07	2.96711e-05	Aged Repressed
Ttc21a	-1.22723	8.31531e-07	2.97358e-05	Aged Repressed
Ostc	-0.463331	8.54668e-07	3.05037e-05	Aged Repressed
Ccdc187	-0.66397	8.92135e-07	3.17484e-05	Aged Repressed
Intu	-0.595107	9.44049e-07	3.32543e-05	Aged Repressed
Fam129b	-0.325464	1.05383e-06	3.68257e-05	Aged Repressed
Gas2l1	-0.47942	1.09769e-06	3.79947e-05	Aged Repressed
Dag1	-0.325486	1.20576e-06	4.15002e-05	Aged Repressed
Sppl2b	-0.422003	1.38991e-06	4.7306e-05	Aged Repressed
Sfpq	-0.371109	1.40382e-06	4.76027e-05	Aged Repressed
Prph2	-0.550784	1.43636e-06	4.86164e-05	Aged Repressed
Rapgef1	-0.341265	1.51103e-06	5.06761e-05	Aged Repressed
Lama5	-0.503099	1.54844e-06	5.15538e-05	Aged Repressed
Spen	-0.404817	1.5877e-06	5.26698e-05	Aged Repressed
Actn1	-0.392975	1.60913e-06	5.32841e-05	Aged Repressed
Gpx6	-2.84284	1.70372e-06	5.61127e-05	Aged Repressed
Hdac7	-0.371434	1.71616e-06	5.632e-05	Aged Repressed
Thbd	-0.34838	1.7886e-06	5.82803e-05	Aged Repressed
Cachd1	-0.434274	1.79665e-06	5.83355e-05	Aged Repressed
Slc31a1	-0.496864	1.80353e-06	5.84554e-05	Aged Repressed
Plekha6	-0.429071	1.80993e-06	5.85594e-05	Aged Repressed
Hsph1	-0.361151	2.02177e-06	6.42795e-05	Aged Repressed
Lum	-0.462017	2.04453e-06	6.47789e-05	Aged Repressed
Uba1	-0.292747	2.18463e-06	6.8625e-05	Aged Repressed
Pomgnt1	-0.521339	2.20025e-06	6.89976e-05	Aged Repressed
Ltbp1	-0.463951	2.49268e-06	7.72437e-05	Aged Repressed
Pcbp2	-0.333596	2.59676e-06	7.99289e-05	Aged Repressed
Wasf2	-0.32434	2.6396e-06	8.07057e-05	Aged Repressed
Ubap2l	-0.324086	2.64829e-06	8.08366e-05	Aged Repressed
Sema4c	-0.460338	2.68119e-06	8.15695e-05	Aged Repressed
Rtl8c	-0.332576	2.7064e-06	8.22002e-05	Aged Repressed
Myh9	-0.338865	2.78716e-06	8.43736e-05	Aged Repressed
Kctd17	-0.472538	2.79404e-06	8.44428e-05	Aged Repressed
Rrbp1	-0.329357	2.80106e-06	8.45156e-05	Aged Repressed
Mark2	-0.352486	2.82038e-06	8.48367e-05	Aged Repressed
Aplp1	-0.309234	2.82601e-06	8.48496e-05	Aged Repressed
Dbn1	-0.413147	2.87584e-06	8.6079e-05	Aged Repressed
Gaa	-0.330057	2.93301e-06	8.7632e-05	Aged Repressed
Ccdc157	-0.373716	3.01578e-06	8.96668e-05	Aged Repressed
Actn4	-0.303724	3.13283e-06	9.29964e-05	Aged Repressed
Nynrin	-0.44321	3.17979e-06	9.4238e-05	Aged Repressed
Spred2	-0.586127	3.33846e-06	9.83049e-05	Aged Repressed
Rab11fip3	-0.415025	3.36849e-06	9.90305e-05	Aged Repressed
Etl4	-0.423726	3.48713e-06	0.000102028	Aged Repressed
Tubb6	-0.58429	3.5953e-06	0.000104405	Aged Repressed
Caskin2	-0.399562	3.59683e-06	0.000104405	Aged Repressed
Lrrc23	-1.19143	3.66955e-06	0.000106012	Aged Repressed
Pthlh	-0.966901	4.02524e-06	0.00011502	Aged Repressed
Ankrd52	-0.402047	4.04334e-06	0.000115358	Aged Repressed
Myo7a	-0.438257	4.53208e-06	0.000127713	Aged Repressed
Fkbp1a	-0.319545	4.59856e-06	0.000129387	Aged Repressed
Cdr2	-0.943005	4.78372e-06	0.00013337	Aged Repressed
Nav3	-1.22973	4.81724e-06	0.00013402	Aged Repressed
Pex6	-0.353362	4.94795e-06	0.000136931	Aged Repressed
Slc16a9	-0.483525	4.96167e-06	0.000137046	Aged Repressed
Prdm16	-0.615799	5.20437e-06	0.000142925	Aged Repressed
Lrp10	-0.381851	5.55229e-06	0.00015141	Aged Repressed
Gtf2i	-0.26084	5.86696e-06	0.000158745	Aged Repressed
Phf2	-0.395306	6.00026e-06	0.000161875	Aged Repressed
Mfn2	-0.31304	6.35292e-06	0.00016989	Aged Repressed
Exoc3l2	-0.538133	6.69872e-06	0.000178357	Aged Repressed
Hexim1	-0.339084	6.74039e-06	0.000179206	Aged Repressed
Notch1	-0.435214	6.78213e-06	0.000180055	Aged Repressed
Oxct1	-0.321259	6.80319e-06	0.000180353	Aged Repressed
Zcchc24	-0.289403	7.23731e-06	0.000189669	Aged Repressed
Bgn	-0.261829	7.70562e-06	0.000201367	Aged Repressed
Gpr137	-0.440916	8.04206e-06	0.000209265	Aged Repressed
Kdm5c	-0.448149	8.24304e-06	0.000213284	Aged Repressed
Kcnh2	-0.66576	9.08794e-06	0.000233172	Aged Repressed
Foxk1	-0.410155	9.0842e-06	0.000233172	Aged Repressed
Nsmf	-0.351385	9.64441e-06	0.000246416	Aged Repressed
A2m	-1.25902	1.01559e-05	0.000258764	Aged Repressed
Syvn1	-0.425331	1.05495e-05	0.000266938	Aged Repressed
Loxl3	-0.365107	1.09403e-05	0.000274931	Aged Repressed
Fgfr1	-0.270222	1.12072e-05	0.00028087	Aged Repressed
Hmg20b	-0.382555	1.13079e-05	0.000283007	Aged Repressed
Ubc	-0.32295	1.13268e-05	0.000283093	Aged Repressed
Pom121	-0.499498	1.17573e-05	0.000291863	Aged Repressed
Por	-0.368044	1.20039e-05	0.000296781	Aged Repressed
Pdia6	-0.313837	1.20587e-05	0.000297735	Aged Repressed
Ggcx	-0.387487	1.2627e-05	0.000309681	Aged Repressed
Nav1	-0.349705	1.29148e-05	0.000315777	Aged Repressed
Mboat2	-0.752263	1.29082e-05	0.000315777	Aged Repressed
Frem1	-1.17275	1.29271e-05	0.000315777	Aged Repressed
Trp73	-2.04236	1.2995e-05	0.000317011	Aged Repressed
Pde6g	-0.426135	1.31002e-05	0.000319154	Aged Repressed
Mrap2	-2.3203	1.32048e-05	0.000321058	Aged Repressed
Atp2b3	-0.962641	1.3624e-05	0.000328859	Aged Repressed
Ints1	-0.360193	1.38031e-05	0.000331872	Aged Repressed
Dio2	-1.23844	1.3994e-05	0.000336021	Aged Repressed
Sec61a1	-0.302147	1.40749e-05	0.000337522	Aged Repressed
Megf8	-0.294687	1.45835e-05	0.000348353	Aged Repressed
Stra6	-0.55671	1.49738e-05	0.000356746	Aged Repressed
Rnft2	-0.467897	1.51645e-05	0.000360352	Aged Repressed
Tnks1bp1	-0.307542	1.52903e-05	0.000362403	Aged Repressed
Eif4g3	-0.270261	1.56821e-05	0.000371209	Aged Repressed
Zfp579	-0.435009	1.64155e-05	0.000385092	Aged Repressed
Tmem237	-0.568646	1.70673e-05	0.000398346	Aged Repressed
Ppp1r37	-0.31576	1.79591e-05	0.00041651	Aged Repressed
Mast2	-0.358112	1.85332e-05	0.000427125	Aged Repressed
Col5a3	-0.456632	1.94376e-05	0.000444063	Aged Repressed
Fasn	-0.320568	1.94244e-05	0.000444063	Aged Repressed
Adamts15	-0.573379	1.9588e-05	0.000446943	Aged Repressed
Cgn	-0.884313	1.96216e-05	0.000447152	Aged Repressed
Lrit1	-0.811251	1.98677e-05	0.000451082	Aged Repressed
Spint2	-0.414642	2.02023e-05	0.000458111	Aged Repressed
Robo4	-0.455553	2.02649e-05	0.000458962	Aged Repressed
Dapk1	-0.406109	2.04076e-05	0.000461055	Aged Repressed
Ubr4	-0.309305	2.0796e-05	0.000467528	Aged Repressed
Eif4g1	-0.259371	2.09352e-05	0.000470082	Aged Repressed
Gcn1	-0.360806	2.23629e-05	0.000499085	Aged Repressed
Nt5dc2	-0.458477	2.3104e-05	0.000513749	Aged Repressed
Nisch	-0.262058	2.32039e-05	0.000515345	Aged Repressed
Card10	-0.422194	2.36023e-05	0.000521667	Aged Repressed
Chpf	-0.311692	2.3909e-05	0.000527177	Aged Repressed
Hcfc1	-0.317431	2.51787e-05	0.000551712	Aged Repressed
Cdk16	-0.298037	2.69477e-05	0.000585035	Aged Repressed
Mtch1	-0.259402	2.82865e-05	0.000611929	Aged Repressed
Dnah6	-1.76357	2.88312e-05	0.000622979	Aged Repressed
Gmnc	-2.01927	2.96082e-05	0.000638264	Aged Repressed
Slc16a2	-0.591446	3.03734e-05	0.000648661	Aged Repressed
Ctxn1	-0.929292	3.09712e-05	0.000659891	Aged Repressed
Sf3b4	-0.53371	3.12687e-05	0.000663148	Aged Repressed
Smpd1	-0.275932	3.22623e-05	0.000681073	Aged Repressed
Zdhhc5	-0.305673	3.23677e-05	0.000681728	Aged Repressed
Msx1	-0.469497	3.24179e-05	0.000682003	Aged Repressed
Cfap206	-1.79242	3.42554e-05	0.00071655	Aged Repressed
Apba3	-0.466473	3.6774e-05	0.000765742	Aged Repressed
Cnnm2	-0.471914	3.76681e-05	0.000781698	Aged Repressed
Trak2	-0.357009	3.78446e-05	0.000783588	Aged Repressed
Tubb5	-0.232909	3.85224e-05	0.000794038	Aged Repressed
Aldh2	-0.263661	3.97494e-05	0.000816577	Aged Repressed
Mta1	-0.385461	4.01248e-05	0.000820612	Aged Repressed
Wasf3	-0.417694	4.03143e-05	0.000823569	Aged Repressed
Ppp1r10	-0.404573	4.04064e-05	0.000824533	Aged Repressed
Unc119b	-0.394729	4.07758e-05	0.000830223	Aged Repressed
Eng	-0.328	4.19084e-05	0.000848784	Aged Repressed
Dlg5	-0.348487	4.43972e-05	0.000895018	Aged Repressed
Chga	-0.470835	4.47358e-05	0.000899866	Aged Repressed
Zfp423	-0.493232	4.51116e-05	0.00090544	Aged Repressed
Marveld1	-0.287452	4.52398e-05	0.00090702	Aged Repressed
Cenpb	-0.257215	4.73156e-05	0.000944243	Aged Repressed
Slc22a17	-0.976093	4.83007e-05	0.000958958	Aged Repressed
BC034090	-0.350541	4.97914e-05	0.000985354	Aged Repressed
Polr2a	-0.32176	5.05963e-05	0.0010002	Aged Repressed
Pdia3	-0.223853	5.30105e-05	0.00103565	Aged Repressed
Dvl3	-0.352069	5.32672e-05	0.00103956	Aged Repressed
Plxnb2	-0.253522	5.6528e-05	0.00109274	Aged Repressed
Pkd1	-0.300055	5.72214e-05	0.00110381	Aged Repressed
Zhx2	-0.414213	5.753e-05	0.00110628	Aged Repressed
Arhgap44	-0.530341	5.99708e-05	0.0011484	Aged Repressed
Smoc2	-0.275762	6.2478e-05	0.0011907	Aged Repressed
Plbd2	-0.279434	6.88018e-05	0.00129586	Aged Repressed
S1pr1	-0.426878	6.96485e-05	0.00131046	Aged Repressed
Rbm14	-0.628671	7.26594e-05	0.00135875	Aged Repressed
Mapre3	-0.364893	7.27934e-05	0.00135956	Aged Repressed
Adamts1	-0.525915	7.30468e-05	0.00136183	Aged Repressed
Igfals	-1.30479	7.3135e-05	0.00136209	Aged Repressed
Tuba1a	-0.329123	7.41652e-05	0.00137988	Aged Repressed
Eno2	-0.315955	7.65779e-05	0.00141615	Aged Repressed
Rd3	-1.16828	7.94974e-05	0.00146277	Aged Repressed
Gbf1	-0.279694	7.99047e-05	0.00146879	Aged Repressed
Pdia4	-0.334148	8.05673e-05	0.00147949	Aged Repressed
Myo1c	-0.259337	8.06949e-05	0.00148035	Aged Repressed
Nfe2l1	-0.244544	8.23933e-05	0.00150698	Aged Repressed
Lrrn2	-0.736688	8.26183e-05	0.00150959	Aged Repressed
Midn	-0.319845	8.6408e-05	0.00156888	Aged Repressed
Cox8a	-0.263679	8.64617e-05	0.00156888	Aged Repressed
Nucb1	-0.285108	8.85967e-05	0.00160445	Aged Repressed
Tbc1d2	-0.929792	8.94042e-05	0.00161588	Aged Repressed
Fads2	-0.373311	8.98322e-05	0.00162202	Aged Repressed
Pcdh12	-0.775887	9.0444e-05	0.00163146	Aged Repressed
Tyro3	-0.775063	9.31151e-05	0.00167306	Aged Repressed
Tspan33	-0.898456	9.5585e-05	0.00171576	Aged Repressed
Nomo1	-0.318908	9.60671e-05	0.00172273	Aged Repressed
Mipep	-0.454982	9.61714e-05	0.00172292	Aged Repressed
Ptpn23	-0.341766	9.88888e-05	0.0017647	Aged Repressed
Zfand3	-0.260815	0.000101086	0.00180036	Aged Repressed
Vwa3a	-1.03821	0.000102014	0.00181167	Aged Repressed
Pmepa1	-0.276947	0.000102713	0.00182232	Aged Repressed
Brinp1	-1.68137	0.000103221	0.00182955	Aged Repressed
Crhr2	-1.31609	0.00010418	0.00184299	Aged Repressed
Ints3	-0.347925	0.000108031	0.00189831	Aged Repressed
Myh14	-0.672288	0.000109179	0.00191481	Aged Repressed
Fam193a	-0.337043	0.000110499	0.00193611	Aged Repressed
Creb3l2	-0.301601	0.000111624	0.00195208	Aged Repressed
Wfs1	-0.356254	0.000111603	0.00195208	Aged Repressed
Pum1	-0.293018	0.000112069	0.00195614	Aged Repressed
Spag6l	-1.66762	0.000117174	0.00203557	Aged Repressed
Steap2	-0.527104	0.000117664	0.0020403	Aged Repressed
Lamc1	-0.300587	0.000117669	0.0020403	Aged Repressed
Myo1b	-0.394787	0.000120291	0.0020779	Aged Repressed
Elfn1	-1.5864	0.000120734	0.0020836	Aged Repressed
Cdhr1	-0.263492	0.000120884	0.00208422	Aged Repressed
Lrp3	-0.370102	0.000121394	0.00209105	Aged Repressed
Six3	-2.00559	0.00012161	0.00209105	Aged Repressed
B4galt1	-0.273157	0.000121926	0.00209432	Aged Repressed
Tie1	-0.335876	0.000125223	0.00213695	Aged Repressed
Calm1	-0.218294	0.000126421	0.00214542	Aged Repressed
Tnfrsf1a	-0.287982	0.000126394	0.00214542	Aged Repressed
Rbm10	-0.313447	0.000126265	0.00214542	Aged Repressed
Phc2	-0.337394	0.0001291	0.00218079	Aged Repressed
Gjc1	-0.507295	0.000129847	0.00218938	Aged Repressed
Crb2	-1.07854	0.000132119	0.00222157	Aged Repressed
Slc25a39	-0.364317	0.000132808	0.00222702	Aged Repressed
Dalrd3	-0.329173	0.000133154	0.00223078	Aged Repressed
Cux2	-0.980491	0.000135501	0.0022639	Aged Repressed
Zfpm1	-0.518473	0.000137034	0.00228535	Aged Repressed
Dnajb11	-0.32733	0.000139049	0.00231685	Aged Repressed
Spef1	-0.590878	0.000143148	0.00237867	Aged Repressed
Hyou1	-0.369681	0.000146977	0.00243128	Aged Repressed
Rnf44	-0.299876	0.000153912	0.00253003	Aged Repressed
Syt9	-0.43444	0.000155445	0.00255066	Aged Repressed
Sash1	-0.27209	0.000157338	0.00257296	Aged Repressed
Defb11	-2.35471	0.0001573	0.00257296	Aged Repressed
Atp5g1	-0.399265	0.000161393	0.00262712	Aged Repressed
Rap1gds1	-0.29872	0.000161725	0.00263019	Aged Repressed
Map1a	-0.319712	0.000163121	0.00264926	Aged Repressed
Zmynd8	-0.275388	0.000167273	0.00268984	Aged Repressed
Parva	-0.239799	0.000167651	0.00269314	Aged Repressed
Ndrg4	-0.495991	0.000172878	0.00277466	Aged Repressed
Ankrd13b	-0.461848	0.000174536	0.00279639	Aged Repressed
Ppp1r16a	-0.369348	0.000179389	0.00286164	Aged Repressed
Ap3d1	-0.224211	0.000181407	0.0028888	Aged Repressed
Pias3	-0.304713	0.000187589	0.00296409	Aged Repressed
Fbln2	-0.331804	0.000193045	0.00304244	Aged Repressed
Olfm1	-0.340249	0.000193416	0.00304568	Aged Repressed
Ankrd45	-1.34487	0.000194436	0.0030565	Aged Repressed
Pgam1	-0.276911	0.000203526	0.00318302	Aged Repressed
Ntrk2	-0.347872	0.00020473	0.00319641	Aged Repressed
Usp19	-0.254908	0.00020904	0.00325538	Aged Repressed
Galr2	-0.593812	0.000217413	0.00337432	Aged Repressed
Zfp608	-0.440434	0.000220678	0.00341343	Aged Repressed
Zdhhc8	-0.401221	0.000223957	0.00345832	Aged Repressed
Rtn4rl1	-0.350505	0.000227401	0.00350266	Aged Repressed
Hspa4	-0.248506	0.000228089	0.00350691	Aged Repressed
Pcsk2	-1.47977	0.000228632	0.00350691	Aged Repressed
Neurl4	-0.279563	0.000228208	0.00350691	Aged Repressed
Tmem201	-0.357728	0.000235312	0.00358836	Aged Repressed
Zdhhc9	-0.439338	0.0002357	0.00359129	Aged Repressed
Tmem100	-0.531831	0.000238947	0.00362976	Aged Repressed
Npr1	-0.381369	0.000240037	0.00364225	Aged Repressed
Myo18a	-0.274008	0.000240709	0.00364641	Aged Repressed
Hadha	-0.255281	0.000241426	0.00365426	Aged Repressed
Tmem184a	-1.69832	0.000246323	0.00372154	Aged Repressed
Hnrnpab	-0.29907	0.000247804	0.00373634	Aged Repressed
Inppl1	-0.282877	0.00024897	0.00374988	Aged Repressed
Rbm47	-0.644832	0.000253677	0.00381764	Aged Repressed
Orai2	-0.540265	0.000257575	0.00386363	Aged Repressed
Bcl6	-0.549988	0.000260846	0.00390555	Aged Repressed
Lrfn2	-1.08734	0.000264761	0.00395203	Aged Repressed
Aldh7a1	-0.279209	0.000267699	0.00399263	Aged Repressed
Ehd1	-0.309888	0.00027269	0.00404079	Aged Repressed
Mapk8ip1	-0.311536	0.000275943	0.0040791	Aged Repressed
Slc4a5	-1.26127	0.000283854	0.00417586	Aged Repressed
Col18a1	-0.361563	0.00028459	0.00418334	Aged Repressed
Cspg4	-0.32493	0.000288266	0.00423398	Aged Repressed
Ybx3	-0.285234	0.000298135	0.00436495	Aged Repressed
Trak1	-0.324037	0.000298888	0.00436901	Aged Repressed
Itgb5	-0.246685	0.000301546	0.00439037	Aged Repressed
Gm7162	-0.736779	0.000301282	0.00439037	Aged Repressed
Flnc	-0.332512	0.000303258	0.00440829	Aged Repressed
Atp2c1	-0.285896	0.000306967	0.00445163	Aged Repressed
Slc4a2	-0.754358	0.000310146	0.00449063	Aged Repressed
Nacc1	-0.294035	0.000314191	0.00453845	Aged Repressed
Dstn	-0.239967	0.000315772	0.00455412	Aged Repressed
Lmf2	-0.319227	0.000315726	0.00455412	Aged Repressed
Atf6b	-0.343929	0.000317432	0.00456729	Aged Repressed
Gdf11	-0.53522	0.000318382	0.00457385	Aged Repressed
Hgs	-0.342073	0.000318387	0.00457385	Aged Repressed
Zc3h7b	-0.258251	0.00032344	0.00463371	Aged Repressed
Rilp	-0.766917	0.000325773	0.00465807	Aged Repressed
Fndc3b	-0.264056	0.00033252	0.00473609	Aged Repressed
Plxdc2	-0.270654	0.000337206	0.00479911	Aged Repressed
Igfn1	-1.22371	0.000337887	0.00480507	Aged Repressed
Rdh5	-0.435603	0.000348763	0.00495589	Aged Repressed
Ube2z	-0.290491	0.000350783	0.00498073	Aged Repressed
Map4k4	-0.271573	0.000352145	0.00499235	Aged Repressed
Myh11	-0.333197	0.000352975	0.00500025	Aged Repressed
Pdzrn3	-0.373839	0.000354732	0.00500966	Aged Repressed
Lrrc59	-0.304798	0.000359599	0.0050745	Aged Repressed
Gde1	-0.302108	0.000362735	0.00511482	Aged Repressed
Nes	-0.357546	0.000365071	0.0051432	Aged Repressed
Rnf182	-0.974638	0.000371995	0.0052253	Aged Repressed
Mgl2	-0.339257	0.000373488	0.00524226	Aged Repressed
Mtcl1	-0.385551	0.000374133	0.0052473	Aged Repressed
Adarb1	-0.309331	0.000383968	0.0053525	Aged Repressed
Fras1	-0.455132	0.000390393	0.00541736	Aged Repressed
Irgq	-0.351905	0.000397193	0.00548682	Aged Repressed
Creld1	-0.344114	0.000415788	0.00571786	Aged Repressed
Aco2	-0.207836	0.000420086	0.00576832	Aged Repressed
Bicd2	-0.338911	0.000426153	0.00583416	Aged Repressed
Ap2a1	-0.374473	0.000438049	0.00598809	Aged Repressed
Jakmip2	-1.37672	0.000451993	0.00613754	Aged Repressed
Copa	-0.202193	0.000451705	0.00613754	Aged Repressed
Angptl2	-0.459036	0.000457743	0.00621102	Aged Repressed
Zfp574	-0.365142	0.000461035	0.00623723	Aged Repressed
Ywhah	-0.273063	0.000470484	0.00635101	Aged Repressed
Rfx1	-0.342371	0.000481027	0.00648856	Aged Repressed
X2410004P03Rik	-1.4781	0.000486742	0.006556	Aged Repressed
Palm	-0.310307	0.00049016	0.00659236	Aged Repressed
Wnk2	-0.557317	0.000490633	0.00659389	Aged Repressed
Slco1c1	-1.60291	0.000493922	0.00663323	Aged Repressed
Dagla	-0.469875	0.000498169	0.00668049	Aged Repressed
Fstl1	-0.218194	0.00051511	0.00685672	Aged Repressed
Rnpep	-0.334737	0.000514944	0.00685672	Aged Repressed
Gm19500	-1.99331	0.00051484	0.00685672	Aged Repressed
Mcf2l	-0.30773	0.000519946	0.00690688	Aged Repressed
Rsph1	-1.0297	0.000524442	0.00694649	Aged Repressed
Sall2	-0.38144	0.000526491	0.0069686	Aged Repressed
Src	-0.356822	0.000536517	0.00708086	Aged Repressed
Ncdn	-0.347676	0.00053731	0.00708303	Aged Repressed
Tmem229b	-0.300057	0.000537453	0.00708303	Aged Repressed
Bin1	-0.246452	0.000542287	0.00713649	Aged Repressed
Naa60	-0.325436	0.000546341	0.00718468	Aged Repressed
Stip1	-0.277162	0.000556172	0.00729827	Aged Repressed
Vapb	-0.229609	0.000559938	0.00733718	Aged Repressed
Scaf1	-0.272073	0.000568869	0.00744889	Aged Repressed
Dusp15	-0.799112	0.000570372	0.00746325	Aged Repressed
Gspt1	-0.298513	0.00057442	0.00750965	Aged Repressed
Metrn	-0.655138	0.000575581	0.00751252	Aged Repressed
Extl3	-0.267828	0.000576185	0.00751252	Aged Repressed
Lman2	-0.243819	0.000579807	0.00754111	Aged Repressed
Cdr2l	-0.383354	0.000580023	0.00754111	Aged Repressed
Zc3h4	-0.277552	0.000587918	0.00763295	Aged Repressed
Brd4	-0.265115	0.000595856	0.00771573	Aged Repressed
Bag6	-0.249591	0.000598305	0.0077295	Aged Repressed
Xylt1	-0.518778	0.000609706	0.00785468	Aged Repressed
Ubald1	-0.316434	0.000610168	0.00785511	Aged Repressed
Glmp	-0.25982	0.000612077	0.00787416	Aged Repressed
Tob1	-0.382279	0.000620645	0.00795093	Aged Repressed
Sox11	-2.47546	0.000624841	0.0079991	Aged Repressed
Unc45a	-0.26599	0.000632769	0.00806121	Aged Repressed
Zfp628	-0.514855	0.000645713	0.00820657	Aged Repressed
Plxna2	-0.344447	0.000647976	0.00822638	Aged Repressed
Vgll4	-0.357276	0.000654588	0.00827676	Aged Repressed
Sh3gl1	-0.289351	0.000668016	0.00841095	Aged Repressed
Lhx4	-0.29479	0.000673895	0.00846753	Aged Repressed
Phyhip	-0.830155	0.000677912	0.00851218	Aged Repressed
Lhfp	-0.250507	0.000679062	0.00852079	Aged Repressed
Dyrk1b	-0.547694	0.000682917	0.00855746	Aged Repressed
Grb14	-0.592481	0.000690375	0.00864501	Aged Repressed
Dock6	-0.270982	0.000697385	0.00872088	Aged Repressed
Sema6a	-0.390826	0.000701559	0.0087671	Aged Repressed
Casz1	-0.380908	0.000705604	0.00880928	Aged Repressed
Frmpd1	-0.729111	0.000706375	0.00880928	Aged Repressed
Ttc9	-0.638436	0.000713915	0.00887917	Aged Repressed
Arid1b	-0.278809	0.00071466	0.00888241	Aged Repressed
Rai1	-0.357252	0.000718358	0.00891629	Aged Repressed
Atp5b	-0.210144	0.000734442	0.00909398	Aged Repressed
Plod2	-0.401093	0.000747079	0.00923528	Aged Repressed
N4bp3	-0.658679	0.000754732	0.00931107	Aged Repressed
Tuba1c	-0.348722	0.000760439	0.00937518	Aged Repressed
Sufu	-0.3636	0.000766206	0.00943801	Aged Repressed
Tjp3	-0.874285	0.000786053	0.00962626	Aged Repressed
Yipf3	-0.247655	0.000789333	0.00965999	Aged Repressed
Josd2	-0.338129	0.000800629	0.00977865	Aged Repressed
Tjap1	-0.322295	0.00080242	0.00978827	Aged Repressed
Emp3	-0.265465	0.000802483	0.00978827	Aged Repressed
Abhd8	-0.242775	0.0008045	0.00980634	Aged Repressed
Oaz2	-0.240562	0.000807796	0.00983345	Aged Repressed
Ston2	-0.522864	0.000815371	0.00991908	Aged Repressed
Bicra	-0.503627	0.000825322	0.0100335	Aged Repressed
Cand2	-0.413741	0.000826885	0.0100458	Aged Repressed
Adcy6	-0.279627	0.000846117	0.0102591	Aged Repressed
Drosha	-0.277785	0.000847288	0.0102665	Aged Repressed
St3gal1	-0.309228	0.000852591	0.0103066	Aged Repressed
Myo5b	-0.77764	0.00085284	0.0103066	Aged Repressed
Cfap52	-1.51694	0.000868871	0.0104796	Aged Repressed
Dnali1	-1.51863	0.000872813	0.0105202	Aged Repressed
Atxn2l	-0.233487	0.000881507	0.0106041	Aged Repressed
Nfatc1	-0.361414	0.000884018	0.0106204	Aged Repressed
Ywhag	-0.247344	0.00088692	0.0106483	Aged Repressed
Sptb	-0.248048	0.000902912	0.010812	Aged Repressed
Slc16a8	-0.869422	0.000905604	0.0108371	Aged Repressed
Oca2	-1.13282	0.000913847	0.0109215	Aged Repressed
Sox18	-0.360763	0.000915185	0.0109304	Aged Repressed
Rapgefl1	-0.759653	0.000937244	0.0111575	Aged Repressed
Zhx3	-0.321109	0.000940115	0.01117	Aged Repressed
Ppp4r1	-0.324564	0.000945201	0.0112159	Aged Repressed
Scap	-0.275033	0.000962981	0.01139	Aged Repressed
Dcaf12l1	-0.680295	0.000992363	0.0116923	Aged Repressed
Rftn1	-0.378015	0.00104154	0.0122168	Aged Repressed
Camkk2	-0.313262	0.00104346	0.0122314	Aged Repressed
Sppl3	-0.319279	0.00104987	0.0122739	Aged Repressed
Gdf7	-1.51824	0.00105043	0.0122739	Aged Repressed
Cttn	-0.211947	0.00105961	0.012342	Aged Repressed
Eri3	-0.256049	0.00106525	0.0123919	Aged Repressed
Islr	-0.180313	0.00106615	0.0123945	Aged Repressed
Wipf1	-0.267623	0.00107556	0.012496	Aged Repressed
Sipa1l2	-0.318157	0.00107882	0.0125252	Aged Repressed
Fmnl3	-0.286193	0.00109573	0.0126901	Aged Repressed
Cxxc1	-0.284147	0.0010971	0.012698	Aged Repressed
Iqsec2	-0.360117	0.0011124	0.0128345	Aged Repressed
Mpp7	-0.540341	0.0011289	0.0130086	Aged Repressed
Nacc2	-0.242178	0.00114105	0.0131239	Aged Repressed
Pacs2	-0.260943	0.00115705	0.0132498	Aged Repressed
Srpx2	-0.348829	0.00116	0.0132752	Aged Repressed
Sipa1	-0.277361	0.00117828	0.0134676	Aged Repressed
Mfrp	-1.63069	0.00118505	0.0135197	Aged Repressed
Brpf3	-0.35166	0.00118866	0.0135525	Aged Repressed
Gas7	-0.35298	0.00119013	0.0135608	Aged Repressed
Gdi1	-0.195007	0.00121046	0.0137839	Aged Repressed
Hps4	-0.414697	0.0012232	0.0139117	Aged Repressed
Cbfa2t3	-0.385861	0.00122526	0.0139265	Aged Repressed
Tsc22d1	-0.204119	0.00123027	0.0139662	Aged Repressed
Atp9a	-0.222294	0.0012311	0.0139669	Aged Repressed
Rsph4a	-1.47208	0.00124361	0.0140915	Aged Repressed
Tmem63b	-0.284577	0.00126869	0.0143402	Aged Repressed
Dlgap1	-0.871488	0.00129998	0.0146226	Aged Repressed
Tafa3	-1.39	0.00129781	0.0146226	Aged Repressed
Ptma	-0.194376	0.001307	0.0146827	Aged Repressed
Sp2	-0.470385	0.00134483	0.0150524	Aged Repressed
Myo19	-0.434124	0.00136074	0.0152026	Aged Repressed
Itpr1	-0.30702	0.0013622	0.0152098	Aged Repressed
Hsp90b1	-0.201267	0.00137467	0.0153302	Aged Repressed
Peli3	-0.344056	0.00141355	0.0157351	Aged Repressed
Atxn2	-0.284114	0.00141637	0.015757	Aged Repressed
Mycbpap	-0.666947	0.00142116	0.0158007	Aged Repressed
Agap3	-0.24234	0.00142424	0.0158254	Aged Repressed
Pcolce2	-1.38975	0.00142716	0.0158328	Aged Repressed
Arhgap23	-0.281545	0.0014275	0.0158328	Aged Repressed
Sebox	-1.33815	0.00143508	0.015888	Aged Repressed
Sf3a1	-0.280143	0.00144963	0.0160395	Aged Repressed
Bag3	-0.339049	0.00146076	0.0161431	Aged Repressed
Catip	-1.02422	0.0014715	0.0162422	Aged Repressed
Arhgef7	-0.248002	0.00148489	0.0163704	Aged Repressed
Pin1	-0.272638	0.0015123	0.0165829	Aged Repressed
Blmh	-0.289491	0.00152386	0.0166698	Aged Repressed
Slc24a5	-0.745274	0.00153738	0.0167877	Aged Repressed
Scarb1	-0.259415	0.00154047	0.0168114	Aged Repressed
Fam81a	-1.40384	0.00154845	0.0168684	Aged Repressed
Ctif	-0.403348	0.0015649	0.0170274	Aged Repressed
Txlna	-0.258046	0.00157258	0.0170906	Aged Repressed
Ubfd1	-0.282781	0.00159094	0.0172698	Aged Repressed
Dok4	-0.470029	0.00160102	0.0173586	Aged Repressed
Nckap5l	-0.421776	0.00161275	0.0174343	Aged Repressed
Baiap2l1	-0.623374	0.00163347	0.0176271	Aged Repressed
Fgf18	-0.844646	0.00164446	0.0177248	Aged Repressed
Rgma	-0.467655	0.00166748	0.0179308	Aged Repressed
Zgpat	-0.295271	0.00171554	0.0183936	Aged Repressed
Ano2	-0.456147	0.00171784	0.0184076	Aged Repressed
Acsf2	-0.400676	0.00174438	0.0186267	Aged Repressed
Flii	-0.20319	0.00174974	0.018673	Aged Repressed
AU040320	-0.271145	0.00175728	0.0187191	Aged Repressed
Socs5	-0.315062	0.00176726	0.0187835	Aged Repressed
Maml1	-0.329773	0.00178999	0.0189675	Aged Repressed
Pelp1	-0.365559	0.00180545	0.0190789	Aged Repressed
Parvb	-0.352757	0.00182022	0.0192129	Aged Repressed
Iqub	-1.19995	0.00182824	0.0192864	Aged Repressed
Cldn2	-1.54892	0.00183118	0.0193064	Aged Repressed
Sim2	-2.66604	0.00183674	0.0193506	Aged Repressed
Isoc2a	-0.261862	0.00190335	0.0199639	Aged Repressed
Fam186a	-0.9008	0.00191557	0.0200807	Aged Repressed
Cntnap1	-0.370279	0.00193363	0.0202237	Aged Repressed
Notch2	-0.205215	0.0019557	0.020408	Aged Repressed
Six3os1	-1.78733	0.00196791	0.0205238	Aged Repressed
mt.Nd4	-0.223044	0.00198758	0.0207054	Aged Repressed
Cxxc5	-0.310116	0.00200358	0.0208484	Aged Repressed
Serpinb1b	-1.71623	0.00200908	0.0208791	Aged Repressed
Tubb4b	-0.246962	0.00202399	0.0210131	Aged Repressed
Cop1	-0.296136	0.00202956	0.0210471	Aged Repressed
Map1s	-0.294098	0.00203199	0.0210604	Aged Repressed
Sall1	-0.242626	0.00203338	0.0210629	Aged Repressed
Srrm3	-0.446399	0.00203746	0.0210873	Aged Repressed
Dusp18	-0.610964	0.0020534	0.0211865	Aged Repressed
Nlgn2	-0.216354	0.0020913	0.0215291	Aged Repressed
Rexo2	-0.280642	0.00211731	0.0217532	Aged Repressed
Tom1l1	-0.46312	0.00215626	0.0220616	Aged Repressed
Med25	-0.263221	0.00216901	0.022155	Aged Repressed
Micall1	-0.312026	0.00217222	0.0221755	Aged Repressed
Drc7	-1.86751	0.00218356	0.0222599	Aged Repressed
Ak4	-0.601656	0.00220829	0.0224342	Aged Repressed
Nacad	-0.782123	0.00221282	0.022465	Aged Repressed
Fam234a	-0.262556	0.00221929	0.0225051	Aged Repressed
Pdlim5	-0.238645	0.00222717	0.0225607	Aged Repressed
Cfap65	-1.44814	0.00223339	0.0226112	Aged Repressed
Cdcp3	-0.809438	0.0022735	0.022954	Aged Repressed
Myh10	-0.234681	0.00227623	0.0229579	Aged Repressed
Arl6ip1	-0.285035	0.00227639	0.0229579	Aged Repressed
Fam189b	-0.355894	0.00227902	0.0229718	Aged Repressed
Ilrun	-0.208974	0.00228504	0.0229945	Aged Repressed
Ralgds	-0.244537	0.0022904	0.0230359	Aged Repressed
Krt75	-1.89342	0.00230149	0.0231296	Aged Repressed
Ryk	-0.262862	0.0023242	0.0233119	Aged Repressed
Dlx6	-0.680414	0.00233242	0.0233816	Aged Repressed
Itpkb	-0.247956	0.00234961	0.0235153	Aged Repressed
Wbp11	-0.281262	0.00235938	0.0236003	Aged Repressed
Nbl1	-0.205791	0.0023692	0.0236597	Aged Repressed
Ago2	-0.265197	0.00237508	0.0237056	Aged Repressed
Cdh5	-0.231276	0.00238321	0.0237479	Aged Repressed
Bcorl1	-0.402695	0.0023892	0.0237689	Aged Repressed
Gm7694	-0.579859	0.00239582	0.023809	Aged Repressed
Dhx16	-0.274397	0.00240331	0.0238318	Aged Repressed
Kcnj14	-0.361927	0.00240109	0.0238318	Aged Repressed
Clic6	-1.46337	0.00243124	0.0240567	Aged Repressed
Usp33	-0.315972	0.00244257	0.0241427	Aged Repressed
Mrtfa	-0.311179	0.00245314	0.0242342	Aged Repressed
Cldn1	-0.615997	0.00247675	0.0244279	Aged Repressed
Camta2	-0.25234	0.00248492	0.0244822	Aged Repressed
Gm24187	-1.48354	0.00249939	0.024574	Aged Repressed
Pkn1	-0.297086	0.00250663	0.0246168	Aged Repressed
Ins2	-2.05552	0.00252165	0.0247246	Aged Repressed
Capsl	-1.50479	0.00254722	0.0249486	Aged Repressed
Zswim8	-0.206245	0.00255651	0.0249995	Aged Repressed
Anxa6	-0.199933	0.00257033	0.0250946	Aged Repressed
Ccdc124	-0.289335	0.00257382	0.0251153	Aged Repressed
Prdm2	-0.244204	0.0025759	0.0251222	Aged Repressed
Afap1l2	-0.332112	0.00258163	0.0251514	Aged Repressed
Slc25a23	-0.263951	0.00262642	0.025547	Aged Repressed
Acox2	-1.54794	0.00263261	0.0255936	Aged Repressed
Atp2b4	-0.241116	0.00265253	0.0257399	Aged Repressed
Stk32a	-0.900106	0.00265326	0.0257399	Aged Repressed
Eml4	-0.326019	0.00266915	0.0258257	Aged Repressed
Rpn1	-0.211519	0.00267884	0.0258928	Aged Repressed
Notch4	-0.340728	0.00269311	0.0260027	Aged Repressed
Pomgnt2	-0.334588	0.00269598	0.0260167	Aged Repressed
Hemk1	-0.350514	0.00270242	0.0260556	Aged Repressed
Gm28729	-1.88261	0.00270285	0.0260556	Aged Repressed
Cdh3	-1.09861	0.00270802	0.026066	Aged Repressed
Gsn	-0.189656	0.00271848	0.0261239	Aged Repressed
Stard13	-0.296907	0.00272261	0.0261498	Aged Repressed
Pip5k1b	-0.639529	0.00272583	0.0261671	Aged Repressed
Kl	-1.88082	0.00273441	0.026222	Aged Repressed
Cgnl1	-0.320834	0.00273941	0.0262562	Aged Repressed
Atg2a	-0.265187	0.00275527	0.0263669	Aged Repressed
Atp5d	-0.226473	0.00279334	0.0265832	Aged Repressed
Sh3bgrl2	-0.320837	0.00279039	0.0265832	Aged Repressed
Kdm4a	-0.240409	0.00279066	0.0265832	Aged Repressed
Hspa12b	-0.321134	0.00281396	0.0267611	Aged Repressed
Lama3	-0.359558	0.00283326	0.0269307	Aged Repressed
Manf	-0.33135	0.00284959	0.0270567	Aged Repressed
Tmcc2	-0.261807	0.00285175	0.0270567	Aged Repressed
Taok2	-0.1888	0.00285389	0.0270567	Aged Repressed
L3mbtl3	-0.394854	0.0028631	0.02713	Aged Repressed
P4hb	-0.16516	0.00287108	0.0271775	Aged Repressed
U2af2	-0.195373	0.00286994	0.0271775	Aged Repressed
AC151602.1	-1.83432	0.00287741	0.0271953	Aged Repressed
Trim8	-0.259787	0.00288905	0.0272913	Aged Repressed
Hapln4	-0.983122	0.00289654	0.0273472	Aged Repressed
Chsy3	-1.18386	0.00290881	0.0274214	Aged Repressed
Actr1b	-0.2127	0.00293672	0.0276277	Aged Repressed
Pdgfb	-0.292012	0.00293964	0.0276411	Aged Repressed
Agpat4	-0.328825	0.00296343	0.0278362	Aged Repressed
Tubb4a	-0.834491	0.00299939	0.0281164	Aged Repressed
Ltbr	-0.296209	0.00305173	0.0285117	Aged Repressed
Sorbs3	-0.22654	0.00306465	0.0285967	Aged Repressed
Tns4	-0.974544	0.00308335	0.0287273	Aged Repressed
Cherp	-0.258843	0.00308282	0.0287273	Aged Repressed
Osbp2	-0.34282	0.00311557	0.0289687	Aged Repressed
Cacng7	-0.377138	0.00314503	0.0291981	Aged Repressed
Sec14l2	-0.531296	0.0031558	0.0292686	Aged Repressed
Caprin1	-0.185851	0.00319559	0.0295629	Aged Repressed
Syt17	-1.50542	0.00323063	0.0298269	Aged Repressed
Vps18	-0.287402	0.00323431	0.0298458	Aged Repressed
Ndufb2	-0.562647	0.00324093	0.0298468	Aged Repressed
Gpat4	-0.227344	0.00330892	0.0303454	Aged Repressed
Map4	-0.171619	0.00332252	0.0304454	Aged Repressed
Mgp	-0.227968	0.00335319	0.0306346	Aged Repressed
Mybph	-0.708154	0.00335659	0.0306426	Aged Repressed
Nhsl2	-0.286301	0.00337617	0.0307832	Aged Repressed
Higd2a	-0.29466	0.00337951	0.0307983	Aged Repressed
Sntb1	-0.54072	0.00341407	0.0310517	Aged Repressed
Acly	-0.285821	0.00342646	0.0311334	Aged Repressed
Slc39a13	-0.247214	0.00345103	0.0313257	Aged Repressed
Rubcn	-0.232307	0.00348952	0.0316124	Aged Repressed
Dnaja4	-0.390664	0.00350577	0.031744	Aged Repressed
Crip2	-0.283209	0.00351256	0.0317843	Aged Repressed
Rnf19b	-0.303708	0.00351369	0.0317843	Aged Repressed
St8sia2	-1.10981	0.00351871	0.0318141	Aged Repressed
Cbx8	-0.467276	0.00353388	0.031904	Aged Repressed
Wnt10b	-0.453921	0.0035887	0.0322877	Aged Repressed
Epb41l1	-0.208374	0.00362801	0.0325456	Aged Repressed
Adgre5	-0.232789	0.00366007	0.0328012	Aged Repressed
Prss23os	-2.06199	0.00370479	0.0331534	Aged Repressed
Flt4	-0.318191	0.0037184	0.0332265	Aged Repressed
Zbtb40	-0.416761	0.00372968	0.0332949	Aged Repressed
Tekt1	-1.51537	0.00374122	0.0333817	Aged Repressed
Arvcf	-0.293969	0.00375848	0.0335031	Aged Repressed
Ccnd3	-0.211247	0.00376252	0.0335228	Aged Repressed
X1700007K13Rik	-1.1392	0.00376726	0.0335487	Aged Repressed
Tgm2	-0.247847	0.0037748	0.0335833	Aged Repressed
Clstn3	-0.223654	0.003813	0.0338574	Aged Repressed
Copb2	-0.195377	0.00381182	0.0338574	Aged Repressed
Eya2	-0.235637	0.00382493	0.0339469	Aged Repressed
Sgta	-0.205594	0.00382948	0.0339709	Aged Repressed
Pkn3	-0.31128	0.00384185	0.0340642	Aged Repressed
Tbc1d9b	-0.217741	0.00388061	0.0343248	Aged Repressed
Gnb3	-0.205805	0.00394304	0.0347765	Aged Repressed
Pdk2	-0.250923	0.0039932	0.0351175	Aged Repressed
Hnrnpul2	-0.176631	0.00399097	0.0351175	Aged Repressed
Mbd3	-0.233115	0.00402702	0.0353303	Aged Repressed
Ctbp1	-0.218409	0.00404521	0.0354729	Aged Repressed
Paqr4	-0.303441	0.00405187	0.0354974	Aged Repressed
Arsb	-0.23867	0.00405086	0.0354974	Aged Repressed
Ak7	-1.19639	0.00408371	0.0357422	Aged Repressed
Vat1l	-1.51474	0.00408208	0.0357422	Aged Repressed
Uso1	-0.217163	0.00409923	0.0358609	Aged Repressed
Armcx3	-0.306215	0.00413957	0.0361277	Aged Repressed
Hnrnpm	-0.170057	0.00414477	0.0361559	Aged Repressed
Epn3	-1.01568	0.00415838	0.0362229	Aged Repressed
Pip4k2b	-0.255641	0.00416538	0.0362667	Aged Repressed
Adgrl1	-0.209574	0.00419777	0.0364967	Aged Repressed
Gm47480	-0.647316	0.00420913	0.0365608	Aged Repressed
Coro1c	-0.266211	0.00421706	0.0365951	Aged Repressed
Slc29a4	-2.08389	0.00424334	0.0368057	Aged Repressed
Ckb	-0.148321	0.00425077	0.0368366	Aged Repressed
Gm3294	-1.70844	0.00425092	0.0368366	Aged Repressed
Itga3	-0.342421	0.00426266	0.0369209	Aged Repressed
Ppm1f	-0.293587	0.00432913	0.037426	Aged Repressed
Slc35e1	-0.30267	0.00435819	0.037624	Aged Repressed
D430019H16Rik	-1.31228	0.00436344	0.0376339	Aged Repressed
Grasp	-0.349462	0.00440125	0.0378533	Aged Repressed
Sec16b	-0.472205	0.00441257	0.037915	Aged Repressed
Gns	-0.171495	0.00445573	0.0382143	Aged Repressed
Sphk2	-0.355992	0.00446154	0.0382462	Aged Repressed
Rela	-0.241473	0.00447122	0.0382934	Aged Repressed
Crtc3	-0.282767	0.00448151	0.0383637	Aged Repressed
Ncln	-0.262658	0.00453618	0.0387052	Aged Repressed
Angptl1	-0.903803	0.00455495	0.0387722	Aged Repressed
Hs6st2	-0.379896	0.00455671	0.0387722	Aged Repressed
Itga6	-0.272442	0.00457103	0.0388527	Aged Repressed
Plxna1	-0.321577	0.00457588	0.0388632	Aged Repressed
Tram2	-0.332607	0.00458112	0.0388897	Aged Repressed
Kcnk1	-1.0902	0.0045901	0.0389479	Aged Repressed
Psap	-0.193311	0.00459737	0.0389916	Aged Repressed
Pald1	-0.273641	0.00460099	0.0390042	Aged Repressed
Tnip1	-0.256767	0.00462089	0.0391549	Aged Repressed
Best3	-2.21456	0.00469233	0.0396138	Aged Repressed
Zmiz2	-0.239644	0.00468763	0.0396138	Aged Repressed
Lingo3	-0.31124	0.00471559	0.0397736	Aged Repressed
Hspd1	-0.195978	0.00475156	0.0400088	Aged Repressed
Kcnq4	-0.37567	0.00476847	0.0400929	Aged Repressed
Mrgprf	-0.447774	0.00476875	0.0400929	Aged Repressed
Sema3b	-0.369046	0.00481428	0.0404016	Aged Repressed
Sympk	-0.208649	0.00482238	0.0404326	Aged Repressed
Mettl3	-0.326882	0.00485039	0.0406153	Aged Repressed
Tsc22d3	-0.24283	0.00493433	0.0412018	Aged Repressed
Sec14l1	-0.17869	0.00494317	0.0412568	Aged Repressed
Slc36a1	-0.294241	0.00495754	0.0413294	Aged Repressed
Tbc1d9	-1.02052	0.00497311	0.0414125	Aged Repressed
Hcn2	-0.534741	0.00498301	0.0414761	Aged Repressed
Bdkrb2	-0.489357	0.00501233	0.0416634	Aged Repressed
Jph4	-0.688741	0.005025	0.0417309	Aged Repressed
Cfap300	-0.653166	0.00507928	0.0421054	Aged Repressed
Ganab	-0.167344	0.00509678	0.0422124	Aged Repressed
Carm1	-0.271077	0.00511576	0.0423313	Aged Repressed
Got2	-0.248867	0.00515011	0.042558	Aged Repressed
Srebf2	-0.221562	0.00516757	0.042683	Aged Repressed
Crx	-0.293893	0.00517265	0.0427058	Aged Repressed
Lzts2	-0.199569	0.00517668	0.0427198	Aged Repressed
Ap2a2	-0.208666	0.00528997	0.0433949	Aged Repressed
D430042O09Rik	-0.257005	0.0052916	0.0433949	Aged Repressed
Cand1	-0.200095	0.00531835	0.0435558	Aged Repressed
Nsg2	-1.03556	0.00534657	0.04367	Aged Repressed
Tbc1d13	-0.243693	0.00534186	0.04367	Aged Repressed
Prkcsh	-0.209078	0.00538058	0.0438892	Aged Repressed
Atp6v0a1	-0.189213	0.00541789	0.0441151	Aged Repressed
Pik3r1	-0.207388	0.00545046	0.0443016	Aged Repressed
Creld2	-0.271439	0.00551163	0.0447393	Aged Repressed
Rnf216	-0.24766	0.00552142	0.0447792	Aged Repressed
Kctd11	-0.429541	0.00552076	0.0447792	Aged Repressed
Ulk1	-0.21184	0.0055626	0.0450733	Aged Repressed
Chd4	-0.185717	0.00556949	0.0450893	Aged Repressed
Tmem94	-0.236296	0.00562707	0.0455353	Aged Repressed
Maats1	-1.33984	0.00565004	0.0456942	Aged Repressed
Pgs1	-0.287356	0.00568977	0.0459819	Aged Repressed
Sfrp4	-0.644597	0.0057146	0.0461419	Aged Repressed
Slc7a10	-1.96598	0.00575385	0.0463568	Aged Repressed
Lrig1	-0.324083	0.00578457	0.0465809	Aged Repressed
Vash1	-0.491346	0.00581824	0.0467933	Aged Repressed
Smad3	-0.247513	0.00584823	0.0469727	Aged Repressed
Mink1	-0.204733	0.00587051	0.0470972	Aged Repressed
Pdzd2	-0.231682	0.00587143	0.0470972	Aged Repressed
Sorl1	-0.228119	0.00592025	0.0474474	Aged Repressed
Aars	-0.199534	0.00593392	0.0475361	Aged Repressed
Synj2	-0.307685	0.00597682	0.0478381	Aged Repressed
Tmsb10	-0.237032	0.00602942	0.0481909	Aged Repressed
Llgl1	-0.23057	0.00609585	0.0486422	Aged Repressed
Mccc1	-0.373634	0.00616257	0.0490439	Aged Repressed
Usp9x	-0.252947	0.00616491	0.0490439	Aged Repressed
Cpne2	-0.350216	0.00617674	0.0491077	Aged Repressed
Arhgap39	-0.321242	0.0061843	0.0491343	Aged Repressed
Ppp2r1a	-0.159797	0.00619235	0.049166	Aged Repressed
Pkm	-0.152547	0.00620427	0.0492076	Aged Repressed
Nrip2	-0.516766	0.00620924	0.0492258	Aged Repressed
Tle2	-0.229685	0.00623	0.0493691	Aged Repressed
Btbd2	-0.232099	0.00623365	0.0493766	Aged Repressed
Smarcb1	-0.23822	0.00624587	0.0494521	Aged Repressed
Add1	-0.153268	0.00626483	0.0495595	Aged Repressed
Arf4	-0.202601	0.00634169	0.0500811	Aged Repressed
Col9a3	-1.18007	0.00639673	0.0504289	Aged Repressed
Ccr10	-0.585906	0.00644342	0.0507533	Aged Repressed
Rp1l1	-0.375214	0.00645595	0.0508302	Aged Repressed
Cidea	-1.14965	0.00647146	0.0508868	Aged Repressed
X1700013F07Rik	-1.86829	0.00649489	0.0510273	Aged Repressed
Elmo2	-0.228454	0.00650316	0.0510704	Aged Repressed
Bpifb1	-0.877644	0.00650689	0.0510779	Aged Repressed
Ttll12	-0.347791	0.00653473	0.0512744	Aged Repressed
Inf2	-0.216378	0.00655204	0.0513766	Aged Repressed
Faap100	-0.37493	0.006579	0.0515109	Aged Repressed
Cdc42bpa	-0.218639	0.00661677	0.0517411	Aged Repressed
Ramp3	-0.554804	0.00662117	0.0517534	Aged Repressed
Rtl8a	-0.369054	0.00664101	0.0518644	Aged Repressed
Nrgn	-0.511431	0.00669487	0.052183	Aged Repressed
Snap91	-0.260488	0.00670906	0.0522623	Aged Repressed
Mkks	-0.615915	0.00671714	0.0522897	Aged Repressed
Stxbp4	-0.331215	0.00680027	0.052883	Aged Repressed
Lman1l	-0.339926	0.00681919	0.0530077	Aged Repressed
Ppfia4	-0.229189	0.00683147	0.053065	Aged Repressed
Itga9	-0.353766	0.00683235	0.053065	Aged Repressed
Slc46a1	-0.437962	0.00683985	0.0530783	Aged Repressed
Pigs	-0.220307	0.00688118	0.0532638	Aged Repressed
Ddr1	-0.277813	0.00689	0.0532934	Aged Repressed
Bad	-0.296453	0.00689082	0.0532934	Aged Repressed
Fam222b	-0.374882	0.00691171	0.0533875	Aged Repressed
Sox13	-0.318935	0.00691508	0.053391	Aged Repressed
Stac	-0.976066	0.00693702	0.0535154	Aged Repressed
Ybx1	-0.158863	0.00694803	0.0535778	Aged Repressed
Cdh23	-0.990735	0.00699965	0.0539306	Aged Repressed
Kcne2	-1.82602	0.00700355	0.0539379	Aged Repressed
Mnt	-0.254897	0.00705992	0.0543492	Aged Repressed
Plod3	-0.229274	0.00706811	0.0543895	Aged Repressed
Crtc1	-0.226534	0.00713138	0.0547615	Aged Repressed
Ankrd40	-0.203741	0.00712932	0.0547615	Aged Repressed
Fam78b	-0.53123	0.00720378	0.055248	Aged Repressed
Gga2	-0.270239	0.00725718	0.0555647	Aged Repressed
Wipf2	-0.279772	0.00728228	0.0556872	Aged Repressed
Yap1	-0.21777	0.00730143	0.0557684	Aged Repressed
Rab3ip	-0.397298	0.00730507	0.0557684	Aged Repressed
Foxj2	-0.244592	0.007339	0.0559808	Aged Repressed
Ss18	-0.225255	0.00738696	0.0562765	Aged Repressed
Mmp17	-0.602969	0.00739238	0.0562944	Aged Repressed
Xpnpep1	-0.236329	0.00740387	0.0563585	Aged Repressed
Rhoc	-0.189829	0.00740777	0.0563648	Aged Repressed
Fa2h	-1.0823	0.00742473	0.0564704	Aged Repressed
Tmem231	-0.385365	0.00746582	0.0567359	Aged Repressed
Olfr1033	-0.488699	0.00748405	0.0568509	Aged Repressed
St5	-0.273587	0.00749915	0.056942	Aged Repressed
Rflna	-0.747033	0.00763132	0.0577815	Aged Repressed
Mprip	-0.168736	0.00768674	0.0581738	Aged Repressed
F2rl1	-0.236542	0.00771714	0.0583188	Aged Repressed
Arap3	-0.273425	0.00772617	0.0583518	Aged Repressed
Nos1ap	-1.03082	0.00774369	0.0584405	Aged Repressed
Tmem72	-1.73732	0.00774746	0.0584405	Aged Repressed
Xirp1	-0.803495	0.00774565	0.0584405	Aged Repressed
Ephb4	-0.213452	0.00778281	0.0586348	Aged Repressed
Trim32	-0.280789	0.00778269	0.0586348	Aged Repressed
Mall	-0.485995	0.00780812	0.0588013	Aged Repressed
Gzmd	-1.88789	0.00783286	0.0589634	Aged Repressed
Cnst	-0.230987	0.0078386	0.0589824	Aged Repressed
Mt3	-1.20982	0.00784661	0.0590185	Aged Repressed
Chrna4	-1.20019	0.00793866	0.0596131	Aged Repressed
Tnfaip6	-1.11826	0.00799146	0.059936	Aged Repressed
Ptp4a3	-0.234958	0.00805827	0.060363	Aged Repressed
Ptpn9	-0.258998	0.00806838	0.0603894	Aged Repressed
Pomt2	-0.231149	0.00807598	0.0604216	Aged Repressed
Plpp1	-0.217594	0.00813696	0.0608282	Aged Repressed
Slc38a3	-0.2228	0.00816729	0.0609556	Aged Repressed
Rtkn	-0.526796	0.00817265	0.0609625	Aged Repressed
Nfkb2	-0.354808	0.00819818	0.0611116	Aged Repressed
Entr1	-0.273382	0.00820327	0.0611182	Aged Repressed
Nfkb1	-0.202747	0.00820573	0.0611182	Aged Repressed
Ttr	-1.30438	0.00822759	0.0612562	Aged Repressed
Wdr86	-0.356695	0.00826734	0.0614355	Aged Repressed
Tnfrsf12a	-0.600039	0.00845645	0.0626567	Aged Repressed
Nek5	-0.964582	0.00845669	0.0626567	Aged Repressed
Parp3	-0.213961	0.00850311	0.0629498	Aged Repressed
Elovl6	-0.559063	0.00852427	0.0630461	Aged Repressed
Map3k5	-0.26932	0.00852643	0.0630461	Aged Repressed
Pigo	-0.292119	0.00855281	0.0632157	Aged Repressed
Rnpepl1	-0.227078	0.00858976	0.0634377	Aged Repressed
Lsp1	-0.281223	0.00863821	0.0636929	Aged Repressed
Ggh	-0.264877	0.00863698	0.0636929	Aged Repressed
Snd1	-0.194059	0.00865129	0.0637534	Aged Repressed
Gm20619	-1.39577	0.00866005	0.063777	Aged Repressed
Adamts5	-0.377237	0.00866478	0.0637862	Aged Repressed
Mxra8os	-1.73205	0.00867712	0.0638292	Aged Repressed
Uqcrc1	-0.18224	0.00876945	0.0643502	Aged Repressed
Gna11	-0.196285	0.00880146	0.0645593	Aged Repressed
Gm26684	-1.23415	0.00883931	0.0647641	Aged Repressed
Gm31727	-1.35804	0.00889399	0.0650819	Aged Repressed
Smpdl3a	-0.187235	0.00890185	0.0651062	Aged Repressed
Jdp2	-0.293061	0.00890441	0.0651062	Aged Repressed
Ap2m1	-0.15299	0.00894041	0.0652394	Aged Repressed
Hnrnpul1	-0.180919	0.00896336	0.0653573	Aged Repressed
Dvl1	-0.19354	0.00898765	0.0654714	Aged Repressed
Got1	-0.26449	0.00901639	0.0656111	Aged Repressed
Sowahc	-1.08326	0.00902345	0.0656365	Aged Repressed
Ptprm	-0.226829	0.00904004	0.0657311	Aged Repressed
Hrk	-1.68685	0.00909325	0.0660069	Aged Repressed
Gucy2f	-1.28771	0.00913617	0.0662463	Aged Repressed
Zmynd10	-1.22606	0.00914382	0.0662755	Aged Repressed
Csrp2	-0.248502	0.00920837	0.0666381	Aged Repressed
Fhad1	-1.67808	0.0092154	0.0666626	Aged Repressed
Traf3ip1	-0.376323	0.00924432	0.0668455	Aged Repressed
Asap1	-0.207945	0.00929842	0.0671817	Aged Repressed
Enpp2	-1.45744	0.0093018	0.0671817	Aged Repressed
Cbx2	-0.620132	0.00932162	0.0672912	Aged Repressed
Zc3h3	-0.403403	0.00932429	0.0672912	Aged Repressed
Bpnt1	-0.284367	0.00939803	0.0677434	Aged Repressed
Rnf126	-0.28536	0.00941095	0.0677566	Aged Repressed
Nup214	-0.26788	0.00943451	0.0678643	Aged Repressed
Jade2	-0.209177	0.00944433	0.0678643	Aged Repressed
Casc4	-0.221904	0.0094481	0.0678643	Aged Repressed
Tsc22d4	-0.243696	0.0095741	0.0686081	Aged Repressed
Samd4	-0.24444	0.00958349	0.0686486	Aged Repressed
Bcr	-0.213331	0.0096025	0.0687043	Aged Repressed
Dym	-0.283107	0.00963573	0.0688915	Aged Repressed
Cfap69	-0.540516	0.00963796	0.0688915	Aged Repressed
Snx9	-0.182715	0.0096778	0.0691083	Aged Repressed
Erf	-0.236084	0.00972957	0.0694509	Aged Repressed
Ppp5c	-0.209999	0.00974017	0.0694996	Aged Repressed
Wnt5b	-0.358717	0.00975621	0.0695599	Aged Repressed
Slc39a12	-1.28772	0.00975531	0.0695599	Aged Repressed
Mgat1	-0.178689	0.00977631	0.0696217	Aged Repressed
Hivep3	-0.304196	0.00977433	0.0696217	Aged Repressed
Esrrb	-2.07493	0.00981856	0.0698416	Aged Repressed
Amotl1	-0.193437	0.00982772	0.0698796	Aged Repressed
Glrx3	-0.241552	0.00990564	0.0703247	Aged Repressed
Cluh	-0.223095	0.00992309	0.0703941	Aged Repressed
Prrt1	-0.245775	0.00994539	0.070525	Aged Repressed
Slc52a3	-0.227088	0.00995562	0.0705649	Aged Repressed
Bmf	-0.28597	0.00999006	0.0707597	Aged Repressed
Gm15564	-1.29476	0.00999709	0.0707822	Aged Repressed
Scaf4	-0.252684	0.0100191	0.070856	Aged Repressed
Ksr1	-0.308309	0.0101363	0.0714094	Aged Repressed
Mast4	-0.282669	0.0101424	0.0714251	Aged Repressed
Atp6v0c	-0.175995	0.0102867	0.0723339	Aged Repressed
Tmprss11a	-1.26335	0.0103096	0.0724079	Aged Repressed
Fth1	-0.136044	0.0104415	0.0731106	Aged Repressed
Iars	-0.258364	0.0104697	0.0732238	Aged Repressed
Fam168b	-0.170645	0.0105002	0.0734093	Aged Repressed
Uck1	-0.233088	0.0106195	0.0740174	Aged Repressed
Mthfr	-0.244854	0.0106164	0.0740174	Aged Repressed
Tns3	-0.175422	0.0106688	0.0743329	Aged Repressed
Pomt1	-0.292661	0.0107186	0.0745667	Aged Repressed
Rhoj	-0.236549	0.01073	0.0745857	Aged Repressed
Sept5	-0.56381	0.0107335	0.0745857	Aged Repressed
Zc3h18	-0.22278	0.0107439	0.0746295	Aged Repressed
Cactin	-0.245139	0.0107588	0.0747052	Aged Repressed
Camsap3	-0.474364	0.0107672	0.0747064	Aged Repressed
mt.Nd2	-0.186756	0.0107651	0.0747064	Aged Repressed
Mpped2	-0.370768	0.0107807	0.0747722	Aged Repressed
Banp	-0.351891	0.0108291	0.0750512	Aged Repressed
Ube3b	-0.20218	0.0108831	0.0753898	Aged Repressed
Nat14	-0.436346	0.0108887	0.0753898	Aged Repressed
Mvb12b	-0.227678	0.0108903	0.0753898	Aged Repressed
Wwc1	-0.876225	0.0109405	0.0756798	Aged Repressed
Tmem131	-0.213084	0.0109593	0.0757814	Aged Repressed
Dtx3	-0.175629	0.0109895	0.0759616	Aged Repressed
Spsb4	-1.74515	0.0110149	0.0760911	Aged Repressed
Tlnrd1	-0.284328	0.011039	0.0762178	Aged Repressed
Phrf1	-0.238277	0.0110449	0.0762297	Aged Repressed
Cdk20	-0.404179	0.0110524	0.076253	Aged Repressed
mt.Nd5	-0.211116	0.0111538	0.0767501	Aged Repressed
Ubqln4	-0.227619	0.0111968	0.0769617	Aged Repressed
Guk1	-0.257531	0.0112634	0.0773308	Aged Repressed
mt.Cytb	-0.202146	0.0112855	0.0774388	Aged Repressed
Raly	-0.179542	0.0113505	0.0777333	Aged Repressed
Ndufa4l2	-0.467296	0.0113517	0.0777333	Aged Repressed
Hspa4l	-0.243593	0.0114108	0.0780588	Aged Repressed
Ccdc68	-1.10541	0.0114163	0.0780588	Aged Repressed
Dlgap4	-0.193644	0.0114161	0.0780588	Aged Repressed
Rab1a	-0.158417	0.0114837	0.0783738	Aged Repressed
Fbxl7	-0.315876	0.0114741	0.0783738	Aged Repressed
Gm7536	-0.538138	0.0114818	0.0783738	Aged Repressed
Letm1	-0.221714	0.0115007	0.0784488	Aged Repressed
Myh7	-1.33578	0.0115124	0.078482	Aged Repressed
Best1	-0.489059	0.0115494	0.0786756	Aged Repressed
Gm2415	-0.617245	0.0116353	0.0791676	Aged Repressed
Adam9	-0.194858	0.0117423	0.0797662	Aged Repressed
Dapk3	-0.267425	0.0117778	0.0799645	Aged Repressed
Ak9	-1.71693	0.0117861	0.0799913	Aged Repressed
Ctsk	-0.290223	0.011847	0.0803453	Aged Repressed
Itga7	-0.325236	0.0118722	0.0804497	Aged Repressed
Nwd1	-0.622904	0.0118756	0.0804497	Aged Repressed
Srpr	-0.154706	0.0118817	0.0804505	Aged Repressed
Os9	-0.147673	0.0118845	0.0804505	Aged Repressed
Copg1	-0.166981	0.0119049	0.0805291	Aged Repressed
Car12	-1.65577	0.0119437	0.0807319	Aged Repressed
Cog1	-0.216824	0.011961	0.0807893	Aged Repressed
Uggt1	-0.213068	0.0119919	0.080909	Aged Repressed
Gzme	-1.48451	0.0119971	0.0809143	Aged Repressed
Mllt6	-0.156296	0.0120657	0.0812678	Aged Repressed
Eif5a	-0.146074	0.0120598	0.0812678	Aged Repressed
Rfx2	-0.476826	0.0121598	0.0818013	Aged Repressed
Nol6	-0.228822	0.0121833	0.0819288	Aged Repressed
Gnai2	-0.167102	0.0122218	0.0821277	Aged Repressed
Dlst	-0.182391	0.0124426	0.083489	Aged Repressed
Aar2	-0.291502	0.0124493	0.0834946	Aged Repressed
Myo16	-1.11756	0.012485	0.0836511	Aged Repressed
Hdgf	-0.186825	0.0125086	0.0837175	Aged Repressed
Dct	-1.66146	0.0125133	0.0837185	Aged Repressed
Ptprk	-0.21297	0.0125393	0.0838315	Aged Repressed
Ywhab	-0.160004	0.0125531	0.0838837	Aged Repressed
Smarcc2	-0.15994	0.0125563	0.0838837	Aged Repressed
Gjb2	-0.29038	0.0125764	0.0839572	Aged Repressed
Ptgir	-0.384553	0.0126643	0.0843903	Aged Repressed
Rbms2	-0.209619	0.0127229	0.0846886	Aged Repressed
Celsr2	-0.38986	0.0127327	0.0847233	Aged Repressed
Efhc1	-0.512797	0.0127664	0.0848549	Aged Repressed
Atg9a	-0.276403	0.0128343	0.0852133	Aged Repressed
Napa	-0.170991	0.0129453	0.0858917	Aged Repressed
Ston1	-0.248345	0.0129481	0.0858917	Aged Repressed
Cab39l	-0.314353	0.0129929	0.0860581	Aged Repressed
Polr2l	-0.297602	0.0129842	0.0860581	Aged Repressed
Gas8	-0.288851	0.012999	0.0860581	Aged Repressed
Fdxr	-0.260326	0.0130096	0.0860971	Aged Repressed
Cc2d1a	-0.290021	0.0130514	0.0863116	Aged Repressed
Vps9d1	-0.271666	0.0130836	0.0864619	Aged Repressed
F5	-1.18515	0.013145	0.0867118	Aged Repressed
Ciz1	-0.217451	0.0131424	0.0867118	Aged Repressed
Snph	-0.440016	0.013173	0.0868652	Aged Repressed
Arl8a	-0.217438	0.0132875	0.0875257	Aged Repressed
Tbc1d10b	-0.226253	0.0132923	0.0875257	Aged Repressed
Sema3g	-0.283954	0.0133514	0.0878832	Aged Repressed
Stub1	-0.216124	0.0133639	0.087903	Aged Repressed
Cabin1	-0.201802	0.0133973	0.0880592	Aged Repressed
Slc45a4	-0.235387	0.0134105	0.0880829	Aged Repressed
Ppp1r1b	-1.2006	0.0134312	0.0881875	Aged Repressed
Slc27a1	-0.174809	0.0135805	0.0890464	Aged Repressed
Fsd1l	-0.494336	0.0135815	0.0890464	Aged Repressed
Map3k12	-0.290666	0.0136529	0.0893232	Aged Repressed
X2510009E07Rik	-0.202582	0.0136612	0.089346	Aged Repressed
Krt2	-2.00897	0.0138223	0.0901443	Aged Repressed
Itpripl1	-0.403816	0.0138226	0.0901443	Aged Repressed
Trpm4	-0.261869	0.0138744	0.0903859	Aged Repressed
Sgms2	-0.349137	0.0138923	0.0904698	Aged Repressed
Hmgn1	-0.164503	0.0139594	0.0908101	Aged Repressed
Csad	-0.19374	0.0140862	0.0914731	Aged Repressed
Strn4	-0.17983	0.0141445	0.091819	Aged Repressed
Sostdc1	-1.22194	0.0141576	0.0918716	Aged Repressed
Prss12	-0.289075	0.0142314	0.0922529	Aged Repressed
Slc37a2	-0.304165	0.0142899	0.0925994	Aged Repressed
Ergic1	-0.201574	0.0143435	0.0927497	Aged Repressed
Usp10	-0.227952	0.0143238	0.0927497	Aged Repressed
Fbxw8	-0.226393	0.0143376	0.0927497	Aged Repressed
Inka2	-0.294237	0.0143407	0.0927497	Aged Repressed
Med15	-0.221104	0.0144151	0.0930819	Aged Repressed
Pdk4	-0.508792	0.0144303	0.0931145	Aged Repressed
Slc39a14	-0.336421	0.0144574	0.0932235	Aged Repressed
Rai2	-0.352205	0.0144962	0.0934408	Aged Repressed
Nrn1	-0.420483	0.0145078	0.0934498	Aged Repressed
Folr1	-1.34858	0.0145548	0.0936214	Aged Repressed
Cdk2ap2	-0.254541	0.0145467	0.0936214	Aged Repressed
Pkd2	-0.172413	0.0145532	0.0936214	Aged Repressed
Mxra7	-0.194592	0.0145766	0.0936631	Aged Repressed
Insyn1	-0.495639	0.0145734	0.0936631	Aged Repressed
Tspan31	-0.203283	0.0146199	0.0938752	Aged Repressed
Pls3	-0.171265	0.0146349	0.0939222	Aged Repressed
Cd59a	-0.283978	0.0146851	0.0941261	Aged Repressed
Wbp1	-0.19055	0.0147116	0.0941361	Aged Repressed
Polr2m	-0.16195	0.0146991	0.0941361	Aged Repressed
Arhgef18	-0.237617	0.0147252	0.0941892	Aged Repressed
Tsc2	-0.181704	0.0147587	0.0942262	Aged Repressed
Numb	-0.234595	0.014811	0.0944416	Aged Repressed
Rgp1	-0.220442	0.0148673	0.0947676	Aged Repressed
Chrna3	-0.220184	0.0149293	0.0950302	Aged Repressed
Sirt2	-0.16555	0.0149914	0.0953566	Aged Repressed
Smpd3	-0.50795	0.0149961	0.0953566	Aged Repressed
Foxj1	-1.39331	0.0150016	0.0953584	Aged Repressed
Kif9	-0.48504	0.0150937	0.0958934	Aged Repressed
Pi16	-0.327619	0.0151336	0.0960386	Aged Repressed
Tmem104	-0.280578	0.0151348	0.0960386	Aged Repressed
Acad8	-0.277714	0.0152523	0.0966171	Aged Repressed
Spata18	-1.36562	0.0153292	0.0969368	Aged Repressed
Spg20	-0.199134	0.0153367	0.0969509	Aged Repressed
Slc25a5	-0.191862	0.0153718	0.0970603	Aged Repressed
Crybb3	-0.664311	0.0154242	0.0973029	Aged Repressed
Laptm4a	-0.134031	0.0155024	0.0976871	Aged Repressed
Fbxo31	-0.244883	0.0155081	0.0976871	Aged Repressed
Gmppb	-0.377537	0.0155385	0.0978222	Aged Repressed
Tbcel	-0.271583	0.0155717	0.0979637	Aged Repressed
Zbtb7b	-0.220174	0.0155843	0.0980096	Aged Repressed
Larp1	-0.177912	0.0157312	0.098764	Aged Repressed
St3gal3	-0.322445	0.0157609	0.0988489	Aged Repressed
Sh3rf1	-0.331187	0.0157526	0.0988489	Aged Repressed
Med24	-0.1923	0.0157698	0.098871	Aged Repressed
Elavl1	-0.245542	0.0158074	0.0990727	Aged Repressed
Spata13	-0.248478	0.0158733	0.0993842	Aged Repressed
Mcam	-0.257014	0.0159607	0.0998198	Aged Repressed
Zfp335	-0.303102	0.0159646	0.0998198	Aged Repressed
