# Supplementary material for: The meningeal transcriptional response to traumatic brain injury and aging
Source: eLife. 2023 Jan 3;12:e81154. doi: 10.7554/eLife.81154 (PMC9810333; doi:10.7554/eLife.81154)
Supplement: Figure 7—source data 5. [file elife-81154-fig7-data5.xlsx]

## Sheet: Sheet1
	Young TBI			Aged TBI
Ighg2c	7.49642	5.79126	10.1342	242.085	277.532	267.825
	Young TBI			Aged TBI
Cd24a	35.9828	39.8345	49.188	63.9717	60.6338	73.5437
Cxcr6	2.90486	3.20867	3.46046	7.52242	9.08109	5.89923
Casp12	31.5787	35.2954	35.3461	46.0049	47.7805	52.0705
Zap70	2.62375	2.42607	2.47176	6.09254	6.35677	5.03401
C2	9.83905	8.13907	11.1229	17.0342	15.2283	17.2257
