# Supplementary material for: The meningeal transcriptional response to traumatic brain injury and aging
Source: eLife. 2023 Jan 3;12:e81154. doi: 10.7554/eLife.81154 (PMC9810333; doi:10.7554/eLife.81154)
Supplement: Figure 8—source data 1. — The up- and downregulated genes for macrophages, fibroblasts, B Cells and T cells were assessed for the scRNA-seq dataset. The up- and downregulated genes for the Young Sham vs. Aged Sham and those unique to the Young TBI vs. Aged TBI were assessed for the bulk RNA-seq dataset. [file elife-81154-fig8-data1.xlsx]

## Sheet: Sheet1
Unique_YT_AT_UP	Unique_YT_AT_DOWN	YS_AS_UP	YS_AS_DOWN	scRNA_fibroblasts_down	scRNA_fibroblasts_up	scRNA_macs_down	scRNA_macs_up	scRNA_Bcell_down	scRNA_Bcell_up	scRNA_Tcell_down	scRNA_Tcell_up
A230057D06Rik	Aar2	Ighm	H19	Lars2	Tcf25	Srsf11	Son	Rpl7	mt-Nd2	Hba-a1	Rpl31
		Igkc	Scml2	Srrm2	Atp6v0c	Eif2s2	mt-Atp8	Stk17b	mt-Nd4	Hbb-bs	Rpl36
AB124611	Aars	Igkv4.55	Ccnd2	Hbb-bs	Prdx1	Rpl11	Snrnp70	Sf3b1	mt-Atp8	Morf4l1	Rpl26
		Ighg2b	Ckmt1	Ube2d3	Nisch	Eif3f	Celf2	Eef1b2	mt-Nd1	Hnrnpa2b1	Rpl22
Abca8b	Abhd8	Trank1	Bcl6b	Prrc2c	Ginm1	B2m	Wnk1	Rpl37a	Ube2d3	Ncl	Coro1a
		Ighv1.26	Egfl6	Hnrnpa2b1	Ndufb11	Man2b1	Macf1	Ncl	mt-Nd5	Cd37	Rps4x
Abl2	AC151602.1	Atp1a2	Zfp385a	Rsrp1	Ptprs	Luc7l2	Igfbp5	Cd55	Ddx5	Gm42418	Rps10
		Syt1	Grm6	Mef2a	Gng5	Eloc	mt-Nd3	Btg2	Ttr	Rbm39	Pabpc1
Ablim2	Aco2	Scgn	Serpinf1	Nfib	Chd9	Cbl	Syk	Ptprc	Mndal	Id2	Rps28
		Jchain	Mapk7	Ddx5	Sumo2	Clec10a	AC149090.1	Tpr	Morf4l1	Rsrp1	Rpl35
Acad10	Acsf2	Gpr158	Kctd10	Rbms1	Selenof	Ahnak	Tm6sf1	Ralgps2	Unc93b1	Ccnd2	Rpl23
		Tmem59l	Col6a1	Csnk1a1	Ppib	Selplg	mt-Nd4	4930523C07Rik	H2-D1	Hnrnpa3	Rps20
Acer3	Actn1	Ly6c2	Pcbp3	Sptbn1	Myl12a	Arpc5	Runx1	Sell	Hnrnpa2b1	Apobec3	Rpl37
		Igkv1.117	Cfp	Kmt2e	Atp5g3	Blvrb	Nisch	Atp1b1	Cd19	Actr3	Rpl27
Acpp	Actn4	H2.Q6	Dpp9	Pafah1b1	Lnpep	Srsf5	mt-Nd5	Ifi203	Snx2	Skap1	Rpl38
		Igha	Rarg	Hnrnpu	Ifitm2	Glud1	Srgap2	H3f3a	Blnk	Gimap3	Rps26
Acsl1	Actr1b	Iglc1	Mef2d	Macf1	Cbx5	Rps10	Mgp	Rpl12	Sp100	Rpl34	Rpl39
		Ache	Col1a1	Afdn	Bloc1s1	Rnf213	Irf2bp2	Rpl35	Tra2b	Tmbim6	Serinc3
Adgrl2	Adam9	C4b	Fkbp10	Pnisr	Dse	Rnh1	Slc6a6	Cytip	Tmbim6	Rps16	Ppia
		Igkv3.2	Smo	Rbm39	Wwp1	Neat1	Inpp5d	Pdia3	Tpm3	Inpp4b	Itgb7
Adm	Adamts15	Prrxl1	Rin2	Sf3b1	Cops6	Nckap1l	Ptprc	Dusp2	Hnrnpu	H2-Q7	Rps7
		Ptgds	Nfix	Bicc1	Eif3f	Cd84	Picalm	Rbm39	Actr3	Msn	Emb
Adpgk	Adamts5	Ighv1.53	Siae	Eif4a2	Nenf	Pilra	Tacc1	Scand1	Clec2d	Son	Rpl15
		Cbln1	Pdzd4	Zbtb20	Zic1	Tsc22d4	Prkcd	Samhd1	Dok3	Rps23	Rpl30
Aldh3b1	Adarb1	Sema5b	Ltbp2	Snrnp70	Srsf11	Ncl	Tcirg1	Serinc3	H2-K1	Samhd1	Rpl18
		H2.Q7	Ppard	Rbm25	mt-Atp8	Arpc2	Lrrc25	Pkig	Gdi2	Tpt1	Rpl21
Aloxe3	Adcy6	Ifit1	Peg3	Ube3a	Ddx50	Ckb	CAAA01147332.1	Gnas	Rps4x	Rpl32	Rps2
		Ighv3.6	Zim1	Nktr	Atp5j	Rps3	Ifnar1	Rpl10	Zfp36	Arpc2	Rps5
Alx3	Add1	Igkv5.39	Nr2f6	Ddx17	Chd3	Arpc1b	Ciita	Msn	Tgfb1	Rpl9	Rps8
		Gm40849	Ikzf4	Bclaf1	Pfn1	Srgn	mt-Nd2	Tmsb4x	Psap	Rpl7	Rps25
Amy1	Adgre5	Ildr2	Tgfb1	Hnrnpa3	Spcs1	Maf	Prrc2c	Rpl22l1	H2-Q7	Srrm2	Rpl35a
		Ppp2r2b	Ccdc97	Thra	Cox6b1	Eif3a	Fyb	Rps27	Id3	Rpl17	Rpl29
Ankra2	Adgrl1	Slc7a11	Fkbp7	Ahnak	Cd302	Fbl	Kmt2e	Mcl1	Prkcd	Rpl11	Selplg
		Ifit2	Grin2d	Rassf2	Cnpy2	Atp1b3	Ubap2l	Txnip	Ldha	Laptm5	Rps27a
Ankrd28	Adora1	Ccl8	Tmem39a	Hnrnph1	Nop10	Scimp	Top1	Cd2	Rpl39	Ddx5	Rps29
		Ighv1.39	Lamb1	Top1	Nedd8	Tpm3	mt-Nd1	Rpl34	Dynll1	Rps14	Eif3f
Anxa1	Aebp1	Slc6a1	Dgcr2	Nsd1	Eif1	Prcp	Kctd12	Bank1	Hnrnpa3	Fxyd5	Rpl13
		Cga	Csnk1g2	Rbm5	Btf3	Tagln2	H2-D1	Lyn	Hnrnpk	Chd3	Cox7c
Aoah	Afap1l2	Sptbn4	Abhd17a	Prkcd	Rpl29	Mtdh	Ifi203	Rps20	Il2rg	Hnrnpk	Eif4a1
		C130026I21Rik	Grik5	Selenok	Hcfc1r1	Mrpl33	Ewsr1	Dnaja1	Ighv14-4	Zfp36l2	Rpl14
Aox1	Agap3	Ctss	Fcgrt	Prrx1	D8Ertd738e	Capns1	Sema4a	Clta	Smim14	Malat1	Rpl28
		Phactr1	Impdh1	Lpp	Emp3	Dab2	Ptpre	Pax5	Psme2	AW112010	Hnrnpu
Apcdd1	Ago2	Sgip1	Calr	Wnk1	Cox7a2	Rbm39	Mtss1	Laptm5	Rpl14	mt-Nd5	Il7r
		Slc22a8	Akt2	Tln1	Tpm3	Psmd8	Fam46a	Sh3bgrl3	Dbnl	Thy1	Rpl18a
Apod	Agpat4	Slc22a6	Clec11a	Arhgap31	Mxd4	Scp2	Prex1	Rsrp1	Junb	Rps19	Rpl19
		Tac4	Arhgef40	Tpr	Ndufa5	Rpl5	Dpm3	Kmt2e	Cst3	Shisa5	Rplp0
Arap2	AI506816	Gimap3	Sgce	Foxp1	Mrps21	Irf5	Clic1	Rpl9	Pgls	Lcp1	Rhoa
		Gabrd	Chn2	Etnk1	Ndufa13	Cyba	H2-DMa	Rplp0	Ubb	Jak1	Atp5e
Arglu1	Ak4	Cd22	Aqp1	Ndufa4	Rpl27	Plxnb2	Tpr	Hvcn1	Tcf3	Zfp36l1	Rpl3
		Scd1	Cnn2	Ttc3	Krtcap2	Ptbp3	Ap2a2	Ubc	Serbp1	mt-Nd1	Rpl5
Arhgap15	Aldh2	Adcyap1r1	Ulk2	Tcf4	Aldoa	Tmem173	Myl12b	Actb	Cnbp	Ptprc	Eef1a1
		Ccl12	Ccl24	Itch	Tkt	Rhog	mt-Nd4l	Arpc1b	Fam49b	Rps15a	Pdia3
Arhgap19	Aldh7a1	H2.K1	Chmp2b	Pbx1	Uqcrb	Rpl14	Hmox2	Gimap1	Rpl38	Rpl27a	Rpl7a
		Snhg11	Nid1	Luc7l2	Itm2b	Hnrnpm	Wwp1	Tax1bp1	Gapdh	mt-Nd2	Cdc42
Arhgap5	Amotl1	Irf7	Cic	Cd81	Rpl24	Clec2d	Gdi2	Foxp1	Dnajc7	Eef1b2	Tmsb4x
		Rgr	Prkaca	Srek1	Clic1	H3f3b	Csnk1a1	Arpc4	Rpl37	Rpl36a	Rps3
Arhgap9	Angptl1	Pou2af1	Dnajb1	Pdgfrb	Chd4	Rpl29	Rab14	Rpl32	Lrmp	Rps18	Rps3a1
		Ly6a	Trim28	Hp1bp3	Rpl18	Tmem55b	Unc93b1	Grcc10	Slc25a5	Myh9	Rps11
Arid4b	Angptl2	Ighv1.80	Reep5	Ndufa2	Psma2	Cops9	Atp2b1	Chd4	Arhgdia	mt-Nd4	Il2rg
		Col23a1	Ephb3	Dtx3	Celf2	Dnajc3	Ldha	H2afj	Rpl3	H3f3b	Fau
Arl4c	Ankrd13b	Iglv1	Rcn1	Eif4g2	Calm3	Dock8	Pou2f2	Rps9	Hmgb1	Btg1	Socs1
		Oasl2	Crkl	Eif2s2	Pebp1	Trim30a	Brd2	Rpl28	Ppia	Mbnl1	Rpl24
Arr3	Ankrd40	Slc13a3	Htra1	Rrbp1	Tmem59	Samhd1	Rhoa	Rps5	Eif5a	Hsp90ab1	Rack1
		Igkv6.17	Fbln1	Mbnl1	Rps3	Apobec3	Rpl15	Rps19	Eif3i	Rps27	Rpl8
Arrdc1	Ankrd52	Pappa2	Adamts4	Fus	Pmepa1	Rps16	Shisa5	Cd79a	Cd52	mt-Atp6	Rpl6
		Gm16505	Neurl1a	Mycbp2	Nme2	Tgfbr2	Mndal	Arhgef1	Cd79b	Rplp1	Serf2
Arrdc4	Ano2	Ifi211	Epha2	Cstb	Tuba1b	Tram1	Btf3	Pou2f2	Apoe	mt-Co2	Rps24
		Ifi213	Sulf2	Ttc14	H3f3a	Srrm2	Ms4a6c	Pafah1b3	Sec61b	Hspa5	Ubc
Ascl1	Anxa6	Enox1	Ctnnb1	Cox4i1	Tomm7	Mcub	Atp6v0b	Cox6b1	Actg1	Pfdn5	H3f3a
		Mpeg1	Khsrp	Nfat5	Rchy1	Ptma	BC005537	Siglecg	Rps3	Mdfic	Rpsa
Atl2	Ap2a1	Otop3	Hnrnpa0	Elob	Fkbp1a	Eif5b	Rpl23a	Napsa	Rps27a	Rpl41	Gpx4
		Slco1a4	Arid1a	Camk2d	Rpl4	Bin1	Dnm2	Rps11	Rpl7a	Rps6	Rps21
Atp13a3	Ap2a2	H2.Q4	Fgfrl1	Srsf5	Ctsl	Nars	C3ar1	Cd37	Sdc4	Rps12	Pkm
		Igkv5.43	Emc10	Malat1	Tubb4b	Rpl19	Taok3	Cib1	Rpl22	mt-Co3	Ptprcap
AW011738	Ap2m1	Tmem179	Dynll1	Rab14	Rpl7	Rrbp1	Cd81	Iqgap1	Cd72	Gnas	Uqcrh
		Acer2	G0s2	2810474O19Rik	Capzb	Rassf4	Tgfbr1	Hbb-bt	Mdh1	Junb	H2-D1
B3galt1	Ap3d1	Ass1	Kdelr3	Nedd4	Rpl15	Rac2	Cd68	Rpl27a	Atp5g1	Anp32a	Sec61g
		Ppp1r1a	Adam19	Mbnl2	Laptm4a	Camk1	Jun	Swap70	Rpl6	Ccr2	Pcbp2
B3galt2	Apba3	Igkv4.59	Git1	Zfhx3	Rpl37	Rplp0	Sdhb	Rps13	Uqcrh	mt-Cytb	Ppp1cc
		Sp100	Scarf2	Pkd1	Rpl3	Rpl18a	Lrp6	Rps15a	Cd83	Arhgap45	Psap
B430306N03Rik	Aplp1	H2.Q5	Ptprs	Med28	Slc25a5	Cdc42	Parp14	Gga2	B2m	mt-Nd4l	Slc3a2
		Doc2a	Zfp651	Vps13a	Pcbp2	Ucp2	Actg1	Fus	Gpx1	AY036118	Cnn2
Baiap3	App	Gm18194	Cad	Ndufs5	Sat1	Rbpj	Degs1	Rps12	Itm2b	Eif5a	Btf3
		B2m	Pea15a	Cald1	Gabarapl2	Psmb6	Sh3bgrl3	Cnn2	Rpl21	Il1rl1	Cxcr6
Baz2b	Arap3	Mx1	Clip3	Sned1	Ddr2	Rps13	Ppib	Arhgap45	Atp5g2	Rps9	Txnip
		Dpp6	Glis2	Cped1	Rpl22	Atpif1	Blnk	Hsp90b1	Rps2	H2-K1	Fth1
BC023105	Arf4	Alcam	Bicc1	Phldb2	Fdx1	Hnrnpa2b1	Tspo	Atp5b	Hcls1	Rps13	Cish
		Slc6a2	Hoxa2	Mtdh	Rps25	Lcp1	Trf	Rpl41	Myl12a	Rps17	Ldha
BC064078	Arhgap23	Slc6a13	Plekhg4	Son	Eef1b2	Nedd8	Itm2b	Rps26	Rpl24	mt-Co1	Itm2b
		Rbp3	Surf4	1110008F13Rik	Uqcr11	Ppia	Cd37	Fam129c	Rps8	Sh3bgrl3	Ywhaz
Bhlhe40	Arhgap39	Bin2	Lpl	Fmo1	Ltbp3	Chd4	Prpf40a	Klf2	Elob	Crip1	Ubb
		Trpm1	Srf	Atox1	Rpl7a	Gpx4	Pea15a	Cox4i1	Ctss	Dynll1	Actg1
Bhlhe41	Arhgap44	Cd8a	Rxra	Maf	Rps4x	Gng5	Ccl9	Irf8	Pkm	Oaz1	Tmem176b
		Abcb1a	Chdh	Ogt	Nfia	Cyb5a	Prelid1	Rpl13	Rpl5	Rpl37a	Ptma
Blk	Arhgdia	Igkv16.104	Sertad4	Rbp1	Rpl8	Ube2d3	Spop	Rpl15	Erp29	Atp5c1	Ifngr1
		Syt4	Scube1	Gstm5	Dcaf8	Rpl27	H3f3a	Blk	Rps7	Gm26917	Lpcat2
Bmi1	Arhgef7	Ighv14.4	Matn4	Tra2a	Actr3	Snx3	Nptn	Lcp1	Hck	Rplp2	Chchd2
		Ighv1.18	Rbpjl	Bnc2	Nfix	Dynll1	Morf4l1	Tpt1	Gm42031	Rnf128	Hmgb1
Bnip3	Arid1b	Igkv3.12	Mpp2	Smarca2	Lrpap1	Cyth4	Alox5ap	Ets1	Rpl36	Capg	Psme1
		Nnat	Traf4	Il6st	Ndufc2	Romo1	Abca1	Rps25	Serp1	Atp5l	Hnrnpf
Bst1	Arl8a	Trim30a	C1qtnf1	Sec31a	Atp6v1g1	Ssr4	Eef1b2	Rplp1	Arpc5l	Elob	Vim
		Sp110	Pigt	Sub1	Vkorc1	Eef1g	Emp3	Rpl4	Ybx1	Arl6ip1	Srgn
Btnl7.ps	Armcx3	Aldoc	Slc12a5	Srsf7	Anxa5	Sf3b1	Canx	Ctsh	2010309G21Rik	Dnaja1	Arpc1b
		Map6	Jph2	Atp6v0a1	Bsg	Srsf7	Tnfaip8l2	Rpl29	Ezr	Sptssa	Atp5b
C130074G19Rik	Arsb	Sv2b	Gpx3	Foxd1	Tmem258	Rpl3	Slc29a1	Rpsa		Myl12b	Eef1d
		Cadps	Sep8	Ndufb6	Dync1i2	Fnbp1	Lamp1	Lars2		Rpl22l1	Ucp2
C1qtnf7	Arvcf	Rnf213	Gid4	Hectd1	Rpl11	Arhgap45	Vdac2	Bcl11a		Rpl10	Gapdh
		Npy	Chd3	Dad1	Trmt112	Eps15	Hnrnpab	Ebf1		Gng5	Itm2c
C1s1	Asap1	Crlf2	Kdm6b	Tmed10	Rps21	Mef2c	Tra2b	Cyfip2		Tagln2	Naca
		Ifi27l2a	Ctdnep1	Sh3glb1	Fis1	Ifi209	Il10ra	Rack1		Eif3h	Ybx1
C2	Atf6b	Osr1	Sparc	C1qtnf5	2410015M20Rik	Rpl10a	Sat1	Tnfrsf13b		Gata3	Calm1
		Naip5	Copz2	Sesn3	Abca1	Coro1a	Psma5	Rpl26		Hsp90aa1	Cd74
Cacna1e	Atg2a	Igkv4.57.1	Slc22a5	Anxa2	Sec61b	Ddx5	Pltp	Pfn1		Tomm7	Eif1
		A530040E14Rik	Scn1b	Tgfb1i1	Nr2f2	Glul	Rnf13	Rpl23		Stat1	Ly6e
Camp	Atg9a	AC167036.1	Aoc3	Sh3pxd2a	Psma3	Psmb8	Gnas	Rpl19		Lztfl1	S100a11
		Ighv9.3	Calm3	Apbb2	Ergic3	Ubl5	Tor1aip1	Ikzf3		Sept1	Skp1a
Capg	Atp2b4	Prtn3	Rcn3	4931406P16Rik	Uqcc2	Dock10	Cd48	Rpl27		Rpl10a	Aldoa
		Ranbp3l	Hdac2	Lima1	Nxf1	Abhd12	Cd33	Limd2		Cnbp
Car1	Atp2c1	Aqp4	Snx3	Tra2b	Hmgn2	Pfdn5	Mrpl30	H3f3b		Ltb
		Igkv2.109	Reep3	Arf1	Atp5b	Rap1b	Gsn	Syk		Rpl4
Car8	Atp5b	Tchh	Nts	Ube2b	Rps14	Tcf25	Chd9	Mef2c		Limd2
		Sel1l3	Dcbld1	Gabarap	Sec62	Tmem234	Hnrnpf	Rps23		Cox6c
Casp12	Atp5d	Ccn3	Lama2	Lrp6	H2afv	Itgb1	C1qb	Zfp36l1		Spcs2
		Igkv3.10	P4ha1	Gpc6	Ost4	Klf3	Gnai2	Eif5		S100a4
Catsperz	Atp5g1	Epha5	Dcn	Grcc10	Actg1	H13	Srp14	Pld4		Pfn1
		Zc3hav1	Epyc	Neo1	Zfp36l2	Cfl1	Atp13a2	Ighd		Hcst
Ccdc62	Atp6v0a1	Npr3	Epb41l2	Gm42418	Skp1a	Fes	Smagp	Ighm		Rpl12
		Ighv1.69	Nuak1	Hspa8	Cryab	Ubxn1	Vsir	Ly6e
Ccdc82	Atp6v0c	Scg5	Igf1	Sptan1	Reep5	Rpl23	Sp110	Myh9
		Gm31520	Sar1a	S100a10	Lrp1	Ndufa6	Capg	Rac2
Ccl6	Atp9a	Bst2	Eif4ebp2	Ndfip1	Selenom	Rpl39	Eif2ak2	Apobec3
		Ms4a3	Unc5b	B2m	Ndufv3	Eif3e	Tmem176b	Iglc1
Ccn1	Atxn2	Garnl3	Slc16a7	Tmco1	Gapdh	Tax1bp1	Csf2ra	Cd47
		Ifit3	Lrig3	Rabac1	Tm2d2	Hnrnpl	Ppp1ca	Son
Ccn2	Atxn2l	H2.T23	Grb10	Kif1b	Flna	Hspa8	Tcea1	Srrm2
		Selplg	Prmt2	Hdlbp	Cox6a1	Atp5j	Zyx	Rps10
Ccr7	AU040320	Slc6a20a	Col6a2	Dap	Mif	Rpl7	Fis1	Rpl10a
		Nlrc5	Pofut2	Tmem30a	Serf2	Eif5a	Ifit3	Srsf3
Ccz1	B4galt1	Nebl	Slc36a2	Rpl10	Fxyd5	Srsf2	Zfp36l1	Rps18
		Cybb	Kremen1	Wls	Rplp2	Ms4a4c	Sh3glb1	H2-DMa
Cd109	Bad	Igkv4.80	Smtn	Per3	Rpl9	Actb	Mrps21	H2-Ab1
		Nkd2	Sep4	Prnp	Rps9	Bcap31	Hp1bp3	Ltb
Cd163	Bag3	Cntn4	Rnf187	Klf3	Ldha	Rpl36	H2-K1	Ddx39b
		Rtp4	Sap30l	Smim14	Rpl27a	Rack1	Rpl18	Gm26917
Cd200r4	Bag6	Slfn2	Galnt10	Rpl17	Pfdn5	Pid1	C1qc	Gm42418
		Syk	Map2k6	Clec2d	Cd63	Colgalt1	mt-Cytb	Ccnd3
Cd209d	Banp	Gm47393	Rnf144a	Cltc	Slit2	Sem1	Fos	Myl12b
		Rlbp1	Id2	Mlec	Mrc2	Tcf4	Ube2i	Rps14
Cd24a	BC034090	Oas1a	Pxdn	H3f3b	Arhgap45	Atp5a1	Clec4a3	Rpl17
		Lilr4b	Mrc2	Smdt1	Ubc	Cltc	Dok2	Malat1
Cd28	Bcl6	Ptprc	Tmem132e	mt-Nd3	Tmed3	Pycard	Rbms1	Rasgrp2
		Igkv1.135	Grin2c	Pcdh7	Rpl32	Ccr5	Serbp1	Ms4a1
Cd300a	Bcorl1	Irf4	Rflnb	Lrrc58	Oat	S100a11	Ndufc1	mt-Co1
		Slc1a3	Cacna1g	Rpl14	Atp5c1	Fth1	Gm2a	mt-Co2
Cd300c2	Bcr	Aox3	Dlg4	Rtn3	Gpx4	Mrfap1	Id2	mt-Atp6
		Cdh8	Vamp2	Slc12a2	Ndufb9	Ctsz	Myl12a	mt-Co3
Cd36	Bdkrb2	Mmp12	Acly	Ubb	Ndufa1	Atp5f1	Rtp4	mt-Nd4l
		Tmem252	Stat5b	Ppia	Ptp4a2	Efhd2	Erp29	mt-Cytb
Cd3d	Best1	Pdc	Adam11	Rps15a	Eif4a1	Tbcb	Twf2
		Cd53	Dcakd	Cfl1	Atp6v1f	Tln1	Gpi1
Cd47	Bgn	Ighv1.81	Fut8	Myh9	Islr	Myo1f	Calr
		Ighv2.2	Tmx1	Wdr83os	Abcd3	Hmgn1	Ifi213
Cd69	Bicd2	Trem2	Zfp36l1	Ndufc1	Snrpd2	Plbd1	Clec4a1
		Slc2a1	Papln	Kcnq1ot1	Ndufb10	Acin1	Rasa4
Cd79b	Bicra	Adamtsl3	Tgfb3	Nr3c1	Sptssa	Dock2	Rpsa
		Adssl1	Ror2	Scd2	Atp6v0e	Pip4k2a	Ywhah
Cd83	Bin1	Grin1	Msx2	Degs1	Cops9	Ap1b1	Bcl2a1b
		Ctsg	Pdlim7	Manf	Rpl36	Uqcr11	Tmem176a
Cdc42se2	Blmh	Ighv5.12	Rhobtb3	Ebf1	S100a1	Mef2a	Cd72
		Ighv1.19	Hapln1	Sec61a1	Cox5b	Rpl34	Nfkbia
Cdcp1	Bmf	Cd72	Vcan	Txn1	Smpdl3a	Fuca1	Plec
		Igkv3.5	Serinc5	St13	Atp6v0b	Camk1d	1810037I17Rik
Cdh1	Bmp1	Iglc2	Zfyve16	Bcap31	Rps5	Gapdh	Prdx1
		Samsn1	Nid2	mt-Nd6	Psmb3	Sdha	mt-Co2
Cdh12	Bpifb1	Oas2	Gdf10	Clk1	Maged2	Clec4b1	H2-DMb1
		Col25a1	Cnmd	Serbp1	Psmb5	Nrp1	Ywhae
Cdh18	Bpifb4	Neat1	Tnfrsf10b	Mpp6	Prkar1a	Bcl2a1d	Ubb
		L1td1	Pdlim2	Dclk1	Dpm3	Rps27	Phf11b
Cdk6	Bpifb6	Cyp4a12b	Hr	AY036118	Ndufa3	Tspan3	Wdr1
		Spn	Gfra2	Rps17	Tubb5	Rps11	Rab7
Cebpe	Bpnt1	Meg3	Efs	Ddit4	Myl12b	Tubb2a	Tubb5
		Mapk12	Sdc2	Dennd4a	Cyb5a	Slc25a5	Tnfrsf1a
Celf2	Brd4	Gpr68	Retreg1	Foxc1	Fau	Sirpb1a	U2af1
		Paqr5	Myo10	Pgam1	Rps27	Rpl10	Ly86
Cep57	Brpf3	Cartpt	Lrp12	Ubl5	Rps18	Vamp8	Spcs1
		Ifit3b	Matn2	Marcks	Rcn1	Fcgr3	G3bp2
Chil1	Btbd2	Grem1	Sybu	Sdf2	Lamb2	Stx7	Sec62
		Cd6	Col14a1	Foxp2	Pid1	Plek	Ost4
Chil3	Bysl	Ighv1.82	C1qtnf6	mt-Nd4	Rpl39	Idh3b	Ilk
		C3ar1	Desi1	Col4a1	Hint1	Tkt	Oas1a
Chl1	Cabin1	Fendrr	Hdac7	Ptms	Rps7	Rps15a	Susd3
		Tnfsf10	Vdr	Hsp90ab1	Tmem176b	Psme2	Nol7
Chrm3	Cacng7	Sphk1	Emp2	Calm1	Rps16	Hsbp1	Nr3c1
		Usp18	Hes1	Mat2a	Zic4	Gns	Anxa5
Chrna5	Cactin	Sned1	Gpt	Mical2	Tubb2a	Myo5a	Rps26
		Gucy1b1	Nectin3	Ahnak2	Auts2	Fgd2	Gnb2
Chst15	Calm1	Derl3	Ccdc80	Arf4	Ctsd	Mat2a	Gbp7
		Ly6d	Snai2	Klf9	Ramp2	Slco2b1	Slfn2
Clec14a	Camkk2	Ifitm3	Boc	Spats2l	Rps13	Sdf2l1	Rsrp1
		Casp7	Mylk	Zfp36l1	Calm2	Dse	mt-Co3
Clec2i	Camsap3	Igkv6.15	Ets2	Six1	Rpl26	Abca9	Nrros
		Gpnmb	Itsn1	Slc7a2	Rps10	Psma4	Stard8
Clec4n	Camta2	H2.T10	Enah	Ctsh	Ypel3	Rpl12	Clec4a2
		Ciart	Gzma	Ctnnb1	Rps27a	Hsp90ab1	Ddx39b
Clec5a	Cand1	Pdcd1	P3h3	Itm2a	Mdh1	Mycbp2	Tsc22d3
		Arhgap11a	Kcnk5	Fgfr1	Hmgn1	Ndufa4	Slamf9
Clip4	Cand2	Myof	Acy1	Arhgap20	Rgs7bp	Sub1	Gpx3
		Ighv1.85	Wfdc1	Rtraf	Ndufa7	Zfhx3	Sec61b
Clybl	Caprin1	Ighv6.6	Nfatc4	Dnaja1	Ftl1	Ndufb4	Mx1
		Lair1	Pcbp4	mt-Nd5	Psmb1	Fcgr4	Rex1bd
Cndp2	Card10	Oas1b	Igf2r	Col5a2	Rplp0	Gng10	Rpn1
		Ccdc85a	Thbs2	Hivep3	Naca	Pfn1	Hmgb1
Cnpy1	Carm1	Ccr1	Hsp90ab1	Pgrmc1	Rpl19	Ybx1	Aplp2
		Gm4951	Ptk7	Wfdc1	Mrpl52	Osbpl9	Sumo2
Cntln	Casc4	Igkv10.96	Pgc	Fat4	Ndufs7	H2afy	Fam105a
		Il7r	Foxp4	S100a11	Stub1	Tbxas1	Il10rb
Cntn1	Casz1	H2.Q10	Nfya	Eef1a1	Aldh2	Txn1	Srp9
		Olfr1372.ps1	Arhgap28	Romo1	Rps29	Ier5	Rnpep
Coch	Cbfa2t3	Thsd4	Epb41l3	Lamp2	Ddost	Itsn1	Zfp36l2
		Ltb	Wiz	Rps23	Selenop	Rpl4	Cd52
Commd3	Cbx2	Ifi44	Twsg1	Car13	Cdon	Nipbl	Gm42031
		X2900052L18Rik	Cacna1h	Oasl2	Atp5g2	Irf8	Mpp1
Coq8a	Cbx8	Skap2	Six2	Tecr	Ank2	Msn	Cycs
		Zbp1	Dnase1l2	Tpm4	Cox8a	Psmb5	Tmem37
Cox7a2l	Cc2d1a	Mthfd1l	Mllt1	Sppl2a	Col16a1	Stub1	Ctss
		Cytl1	Svil	Egfr	Rps2	Npm1	Tap1
Cpeb2	Ccdc124	Gfap	Pkdcc	Ptma	Lsp1	Actr2	Atxn7l3b
		Slc8a1	Slc39a6	Glg1	Col1a1	Skap2	Slc3a2
Crebrf	Ccdc157	Hhip	Adamts10	Map1b	Rps26	Rpl32	Rpl6
		Rab27a	Col11a2	Slc4a4	Rpl13	Sirpa	Atp5k
Creg1	Ccdc187	Ighv2.3	Prrc2a	Scara3	Glmp	Atp5l	Ier2
		Spock1	Zfp521	Sec61g	Sdf4	mt-Atp6	Ifngr1
Crlf3	Ccdc68	Slfn1	Dpysl3	Morf4l1	Rps28	Arhgap30	Ssu72
		Fgfbp1	Rab27b	Ifitm3	Chchd2	Atp5d	Vim
Cryzl2	Ccnd3	Cd5	Sncaip	Fkbp2	Mdh2	Psmb10	Cd74
		Gm42047	Snx24	Ostc	Nrp1	Snrpe	Cndp2
Cst7	Ccr10	Hpcal4	Ppic	Vcl	Acer3	Rps25	Rhob
		A730046J19Rik	Prrc1	P4ha1	Kdelr1	Ctsh	0610012G03Rik
Ctla2a	Cd59a	Phf24	Pdgfrb	Atp5d	Ahcyl2	Lyn	Cd79b
		Gm8995	Rab3il1	Kifap3	Sem1	Rpl17	Lgmn
Ctse	Cdc42bpa	Vcam1	Tmem132a	Mrfap1	Serpinh1	Atp5b	Gpx1
		Tspoap1	Cemip2	Uqcrq	Rps11	Eif3i	Psmb1
Cxcl16	Cdcp3	Col13a1	Cdc42bpg	Fat1	Cyba	Cox6b1	Grina
		Shtn1	Ppp2r5b	Sparcl1	Uqcrh	Irf2	Tm9sf2
Cxcr3	Cdh23	Gria4	Gpha2	Ntrk3	Uqcr10	Eno1	Slfn8
		Cxcl12	Tnfrsf25	Dpysl3	Usmg5	Arhgdib	Dok3
Cxcr6	Cdh3	Tap1	Il33	Anapc11	Tspo	Laptm5	Cd14
		Naip2	Pitpnm1	Ndrg1	Arl6ip5	Csde1	Aldh2
Cybrd1	Cdh5	Wnt6	Lrp5	Plpp1	Rpl28	Ptgs1	Egr1
		Slfn8	Ltbp3	Grb10	Rpl21	Fus	mt-Co1
Cyp2d22	Cdhr1	St8sia6	Aldh18a1	Ogn	S100b	Cnn2	Glmp
		Trim30d	Col17a1	Myl6	Vdac1	Cyfip1	Nop10
Dach1	Cdk16	Igkv12.44	Pycr1	Rps12	Snx2	Xrn2	Ddost
		Gabrr3	Cbr2	Ndrg2	Rps8	Grcc10	Serpinb6a
Dapl1	Cdk20	Sorbs1	Maged1	Cygb	Loxl1	Rpl27a	Trmt112
		Vsig4	Rfng	Sdc4	Rpl35	Spi1	Cmpk1
Dazap2	Cdk2ap2	Pde1a	Kazald1	Bace2	Rpl23	Rpl26	Fermt3
		Igkv12.41	Fgd1	Chmp2a	Tm4sf1	Itga4	Cxcl16
Dcc	Cdr2l	Mapt	Maged2	Rpl31	Rpl30	Rps29	Rps5
		H2.M9	Nab2	Gstm1	Rbm3	Rpl36al	Mfsd1
Ddx60	Celsr2	Vipr2	R3hdm2	Dkk3	Tmbim6	Rps12	Igtp
		Kcnt1	Gli1	Ralbp1	Fcer1g	Rps19	Lgals3bp
Dek	Cenpb	Prg2	Nptx1	Rplp1	Rpl38	Ap2s1	Prdx2
		Dcbld2	Fbxl16	Fth1	1500015O10Rik	Eif4g2	Klf2
Dennd2d	Cfap300	Cd3g	Sdc3	Neat1	Rps3a1	Cyp4f18	C5ar1
		Nr6a1	Crispld1	Col11a1	Cd9	Acp2	Atp6v0c
Dennd4a	Chd4	Ifi207	Clec3b	Gdi2	H2afj	Cenpx	Zfp36
		Ide	Rassf3	P4hb	Fkbp7	Snx6	Hexb
Dennd5b	Cherp	Nos1	Rftn2	Sf3b2	2010107E04Rik	Ptpn6	Cox7c
		Sgms1	Col3a1	Tpm1	H2-Ab1	Atp6v1g1	Nme2
Dio3	Chga	Isg15	Cnga3	Pla2g4a	Ndufb4	Hmgb2	H2-T23
		Grap2	Ctdsp1	Tmem158	H2-DMb1	Txn2	Stab1
Diras2	Chpf	mt.Rnr2	Igfbp5	Abi3bp	Atp5g1	F11r	Myl6
		Oasl1	Obsl1	Cd24a	Serpinf1	Scarb2	Calm3
Dlx4	Chrna3	Cd52	Nppc	Pkdcc	Fcgrt	Hnrnpa3	Samd9l
		Psmb8	Bok	Rpl34	Rpl36a	Mbnl1	Bloc1s1
Dnajc12	Chrna4	Nrxn3	Pam	Peg3	Tpt1	Pdia6	Scpep1
		Bmp4	Rgl1	Bmper	Gstp1	Atp6v1f	Iigp1
Dnase2a	Chsy3	D430041D05Rik	Mpzl1	Eef1g	Mrc1	Caprin1	Rpl7a
		Igkv9.124	Dpt	Rhoc	Grn	Cox8a	Mafb
Dok3	Ciz1	Prodh	Prrx1	Tspan11	Tma7	Tmsb4x	Cd9
		Bcan	Traf5	Mmp14	Tpi1	Psmc3	Xaf1
Dpep1	Ckb	Coro1a	Ddr2	mt-Nd1	Rpl18a	Prdx5	P2rx4
		Igkv8.27	Ccdc3	mt-Atp6	Arl6ip1	Atrx	Taf6l
Draxin	Clstn3	Cpeb1	Tnn	Serpinb6a	Rpl41	Pak2	Ywhag
		Ier3	Lypd6b	Plec	Cebpd	Sec14l1	Rpl37
Dsg3	Cluh	H2.DMb2	St6galnac6	Gja1	Rpl13a	Psenen	Polr1d
		Eps8l1	Ak1	Sap18	Rps6	Lair1	Mt1
E330013P04Rik	Cmip	Tmod2	Slc25a25	Canx	Adam12	Slc9a9	P4hb
		Cirbp	Dnm1	Pttg1ip	Eef1d	Rpl37a	Metrnl
Echdc2	Cmklr1	Prr29	Nr4a2	Ndufb7	Minos1	Hspa4	Eif4a1
		Acsbg1	Col5a1	Rpn2	Cox5a	Cotl1	Ccl6
Edar	Cnst	Iqgap2	Gpsm1	Fgfr2	Pcolce	Brk1	Tomm22
		Dhx58	Cat	Fzd2	Park7	Manf	Laptm4a
Efemp1	Cntnap1	Crmp1	Fbn1	Cnbp	Hnrnpf	Cfh	Prpf8
		Fgf12	Tspan18	Akr1a1	Ncl	Sf3b2	Plekho1
Egfl7	Cog1	Fcgr1	Sord	Hmgcs2	Lmo4	Bin2	Rpl38
		Mgarp	Creb3l1	Calu	Lrp10	Syngr2	Il2rg
Eif2ak2	Col18a1	Rsad2	Lrp4	App	Erp29	Hnrnpu	Batf3
		Itpr3	Dll4	Atxn7l3b	Cpz	Hpgds	Rpn2
Eif3e	Col4a1	Ceacam16	Fbln7	Tmed9	H2-Aa	Dusp6	Naaa
		Gm14964	Cpxm1	Srp14	mt-Nd2	Tpt1	Fcer1g
Eif5b	Col4a2	Gpr31c	Fam110a	Akap12	Rnase4	Igf1	Pcbp2
		Ighv5.17	Angpt4	Atp5h	Slc25a3	Zeb2os	Selenop
Elmod1	Col5a2	Lax1	Gnas	Epas1	Tmed2	Ifnar2	Arl6ip1
		Ifi204	Car3	Hmgb1	Npm1	Ostc	Reep5
Epm2a	Col5a3	Ighv1.64	Dok5	Saraf	G3bp2	Zeb2	Sult1a1
		Gm43534	Map1lc3a	Rer1	Rpl22l1	Npl	Adgre1
Epsti1	Colec12	Tlr7	Slc2a10	Gm973	Hspb1	Rps6	Rab11a
		Oas3	Postn	Igf2	Sqstm1	Pomp	Ier3
Erbin	Cop1	Plcb2	Wwtr1	Ckap4	Cdkn1c	Srsf3	Ube2b
		Casp4	Tsc22d2	Sh3bgrl3	Iscu	Banf1	Crip1
Esm1	Copa	Gbp8	Mme	Adam33	Vdac2	Rps18	M6pr
		Cyfip2	Ptx3	Snrpb	1810058I24Rik	Akap13	Irf1
Espn	Copb2	Dgkd	Olfml3	Gstm2	Eef2	Flna	Mdh1
		Itgb7	Syt6	Tax1bp1	Cd151	Sesn1	Ccl12
Etnk1	Copg1	Igkv1.88	Ptgfrn	Errfi1	Tmem176a	Rps9	Itgb2
		Parvg	Hmgcs2	Bst2	Cox7b	Ramp1	Adipor1
Evi2a	Coro1c	Ikzf3	Ampd2	Cxcl14	Fam180a	Cmtm3	Fxyd2
		Arhgap45	Slc27a3	Nav2	Col1a2	Hspe1	Ighm
F830016B08Rik	Cox8a	Kcnj10	Col11a1		Egr1	F13a1	Tmem59
		Ctsc	Snx7		Cystm1	Mcl1	Psap
Fabp4	Cpne2	Vav1	Enpep		Cited2	Gngt2
		AU020206	Dkk2		Phlda3	Rtn4
Fabp5	Creb3l2	Ighv1.77	Ptgfr		Rpl10a	Ptges3
		Cd79a	Hcn3		Rpl35a	Cd86
Fads2b	Creld1	Dclk3	Lmna		Ywhaz	Ccdc50
		Pglyrp1	Epha7		Lamp1	Rplp1
Fam135b	Creld2	Ms4a4b	Col15a1		Prdx5	Cx3cr1
		H2.D1	Tnc		Apoe	Rnase6
Fam180a	Crip2	Ldha	Ptprd		C1qtnf2	Cox7b
		Vmp1	Dnaja1		Hexa	Rbm25
Fam204a	Crispld2	Tal2	Cntfr		Cfh	Myh9
		Fcer1a	Tesk1		Atp5e	Ncf4
Fam217a	Crocc	Irak3	Tpm2		Cdh11	Fkbp2
		Ighv1.5	Plpp3		Junb	Dnaja1
Fam49b	Crtc1	Vill	B4galt2		Ctsk	Was
		Trpm6	Rnf11		Sparc	Ssh2
Fam76b	Crtc3	Apobec1	Nfia		Crtap	Rps14
		C1qa	Lrrc38		Emc7	Pik3ap1
Fbln5	Crx	Ptprn	Gpx7		Dusp1	Gm26917
		Sh3gl3	P3h1		Ikbip	Snrpf
Fcho1	Crybb3	Apol11b	Ephb2		Atp1b1	Dync1h1
		AC147806.2	Ptch2		Msx1	Snrpd2
Fcna	Csad	Dcdc2a	Hspg2		Dbi	Hnrnpa1
		H2.Eb2	Alpl		Itm2c	Rps23
Fcnb	Cspg4	Hp	Stmn1		Swi5	Rac1
		Plek	Map7d1		Adamts9	Cflar
Fermt3	Csrp2	Fam163b	Slc9a1		Atp5o.1	Ndufb7
		Sema3d	Arhgef19		Rpl6	Slamf8
Ffar2	Ctbp1	Itgb2	Cdk14		H2-Eb1	Pafah1b1
		Nlrp5.ps	Smarcd3		Csf1r	Lgals1
Fgd2	Ctif	Gm10499	Ski		Slc9b2	Ube2l3
		Tspan8	Plch2		Adamts2	Ophn1
Fhl2	Ctsk	Ifitm1	Mmp23		Fndc3a	Ncoa4
		Irf8	Mxra8		Ywhae	Snx20
Fibin	Cttn	Pla2g7	Adgra3		Rbbp7	S100a4
		Il18rap	Sorcs2		Atp5j2	Ptms
Fmo2	Ctxn1	Ighv1.7	Htra3		Lamtor2	Napsa
		Etnppl	Evc		Ociad1	Cdk2ap2
Fmo4	Cxxc1	Plac8	Cgref1		Olfml3	Gm42418
		Msln	Emilin1		Smpd1	Trir
Folh1	Cxxc5	Adam33	Fam114a1		G0s2	Lars2
		Adgrg5	Cxcl3		Ndufa11	Ccr1
Foxp1	D430019H16Rik	AW112010	Shroom3		Rack1	Ccl8
		Lck	Ncor2		Tomm20	Siglech
Fpr2	D430042O09Rik	H2.M3	Srsf9		Actb	Hbb-bs
		H2.T22	Foxp2		Shisa5	Hba-a1
Fst	Dab2ip	Nap1l5	Actb		Wfdc2	Hba-a2
		Cxcl13	Fscn1
Fyb	Dag1	Ccbe1	Col1a2
		Car4	Auts2
Fzd9	Dagla	Thbs1	Gnb2
		Lama1	Pcolce
G6pdx	Dalrd3	Ptpn22	Dlx5
		Jakmip3	Dync1i1
Galnt15	Dapk1	Cd33	Calu
		Igkv5.48	Fkbp9
Gask1b	Dapk3	Mlc1	Zyx
		Cd8b1	Dusp11
Gbgt1	Dct	H2.T.ps	Adamts9
		Nyap2	Gxylt2
Gbp7	Dctn1	Slc16a11	Grip2
		Tnfrsf11b	Mlf2
Gcnt1	Dhx16	Hk2	Ptms
		Lrat	Plxnd1
Gda	Dio2	Ighv1.72	Lrp6
		Havcr2	Abcc9
Gem	Dlg5	Slc30a10	Sspn
		Sez6l	Srgap3
Gh	Dlgap4	Igkv8.19	Tspan9
		Per2	Fkbp4
Gimap1	Dlst	Arhgap30	Mark4
		Cpne7	Dmpk
Glipr2	Dlx6	Plscr2	Kctd15
		Rian	Pcsk6
Gm10354	Dnaja4	Dock3	Lrfn1
		Hmgb2	Acan
Gm14027	Dnajb11	Igkv4.50	Sytl2
		Cyp4f18	Maz
Gm15857	Dok4	Cd2	Chrdl2
		Fbxo2	Sh2b1
Gm15892	Drosha	H2.Q1	Pak1
		Nckap1l	Tgfb1i1
Gm16026	Dstn	Arrdc3	Fgfr2
		Icosl	Cpxm2
Gm21188	Dtx3	Stxbp2	Cckbr
		Gclc	Crym
Gm26782	Dusp15	A530020G20Rik	Tub
		Clic5	Smarca1
Gm26813	Dvl1	Sult1c2	Slc9a9
		Ptpn6	Cacna1f
Gm26902	Dvl3	Srarp	Efnb1
		Megf10	Itm2a
Gm45104	Dym	Igkv6.20	Tnmd
		Ighv5.6	Chrdl1
Gm45828	Dyrk1b	Iigp1	Lrch2
		Xaf1	Rs1
Gm47015	Dysf	C6	Morf4l2
		Ighv1.9	Grk1
Gm47173	Efhc1	Mlkl	Angpt2
		Atp10a	Adgra2
Gm47445	Ehd1	Slc23a2	Tenm3
		Ighg1	Plpp5
Gm49492	Ehd2	Mpo	Pdgfrl
		Impg2	Hpgd
Gm49760	Eif4g1	Fam169b	Ednra
		Tmem37	Cdh11
Gm5784	Eif4g3	Clca3a1	Irx3
		Pgf	Irx5
Gm7061	Eif5a	C1qb	St3gal2
		Fgf7	Cngb1
Gm765	Elavl1	Chd5	Mmp15
		Ccl5	Pik3r2
Gm8189	Elmo2	Hspa12a	Mbtps1
		Serpine1	Rab3a
Gmds	Eln	Apol9b	Comp
		Mndal	Cmtm3
Gpam	Elovl6	Ighv1.55	Bcar1
		A530032D15Rik	X2310022B05Rik
Gpr132	Eml4	Apol9a	Egln1
		Nxph3	Sesn3
Gpr156	Emp1	Ighv1.58	Nectin1
		Cacna1b	Oaf
Gpr18	Emp3	Map3k8	Clmp
		H2.M11	Bace1
Gprasp2	Eng	Acap1	Stt3a
		Kng2	C2cd2l
Greb1	Eno2	Igkv15.103	Itga11
		Tubb2b	Col12a1
Grem2	Entr1	Fcgr4	Loxl1
		Fcgr2b	Neo1
Grhl1	Epb41l1	Pde10a	Impg1
		Dst	Tmed3
Gria1	Ephb4	Anxa3	Tpm1
		Itgal	Dapk2
Grk3	Erf	Trbc2	Crtap
		Gldn	Pth1r
Gsta4	Ergic1	Gzmk	Amotl2
		Tspan10	Chsy1
Gstm2	Eri3	Pirb	Mdfi
		Igkv9.120	Tpcn1
Gstm5	Esrrb	Ms4a4d	Heyl
		Alpk1	Igdcc4
Gstm6	Etl4	Pbx3	Prr5l
		Cd84	Arhgef17
Gstt2	Exoc3l2	Syt10	Lmo7
		Ccl7	Podxl2
Gtdc1	Extl3	Ly9	Mgll
		Pde1b	Ttc28
Gyg	Eya2	Slc38a5	Duox1
		Baz1a	Ptprf
H2.Aa	F2rl1	Igkv4.79	Lpp
		Pdzk1ip1	Chst2
H2.DMa	Fa2h	Ighd	Prrg3
		Sla	Antxr1
H2.DMb1	Faap100	Lcp2	Armcx2
		Stat1	Rbfox2
H2.M2	Fam129b	Gp5	Igf2bp2
		Gm5424	Ndn
H2.Ob	Fam168b	Ighv1.50	Mtss2
		Fabp7	Tpst1
H2.Q2	Fam189b	Hs3st3a1	Scx
		Begain	Emid1
Hcar1	Fam193a	Ly75	Loxl2
		Treml1	Gpc1
Herc3	Fam222b	Fcmr	Agpat1
		Cd37	Fhod3
Herc6	Fam234a	Slamf9	Fam53c
		Akr1b10	Slc24a1
Hipk1	Fam78b	Gm20486	Poglut3
		Igkv1.110	Zfp395
Hmox1	Fap	Cbs	Ppm1h
		Oas1g	Lrrn1
Hnmt	Fasn	Lrp11	Dbn1
		Ifi203	Sema3f
Hpgds	Fbln2	Hhipl1	Prr7
		Upk1b	Ttyh2
Hps3	Fbxl7	Resp18	Plvap
		Tmem63c	Ano8
Hpse2	Fbxo31	Traf3ip3	Fam167a
		Zmynd15	Plekhh3
Hs3st1	Fbxw8	Ifitm6	Lars2
		Cxcl10	Epn1
Hs3st3b1	Fdxr	Ch25h	Lcat
		Cdkn2c	Abi3bp
Hs3st4	Fgf18	Abcc4	Ssc5d
		Slc5a5	Sec31a
Hsf2bp	Fgfr1	Pnpla7	X1810055G02Rik
		Slc28a2	Reep6
Htatip2	Fkbp1a	Apobr	Acta2
		Foxf1	Twist1
Icos	Flii	Nphs2	Cd276
		mt.Tp	Rusc2
Id1	Flnc	Il17ra	Smug1
		Cyth4	H1f2
Id4	Flrt2	Cacna1a	Sh3bp4
		Ifi209	Igfbp7
Ifi47	Flt4	Igkv14.111	Fstl4
		Synm	X9530068E07Rik
Ighe	Fmnl3	Stxbp1	Siah2
		Trpm2	Ppfibp2
Ighg2c	Fndc3b	Astn1	Adamts2
		Ramp1	Ttyh3
Ighv1.12	Foxj2	Mmrn1	Cpz
		Gbp3	Chst12
Ighv1.15	Foxk1	Cd274	Alx1
		Plscr4	Tcaf1
Ighv1.22	Fras1	Eogt	Dner
		Atp2a3	Dchs1
Ighv1.4	Frmpd1	Adhfe1	Smad6
		Cyp2e1	Fzd8
Ighv1.42	Fsd1l	Ifih1	Lrfn3
		Gpr183	Asap3
Ighv1.52	Fstl1	Tgtp2	Frem2
		Myzap	Pax1
Ighv1.75	Fth1	Sgf29	Cavin3
		Rac2	Setd7
Ighv1.78	Furin	Gm37795	Mycn
		Hpca	Syn1
Ighv10.1	Gaa	Aldh6a1	Mospd3
		Lrrc27	Mxd4
Ighv11.2	Galr2	Mir142hg	Spon2
		Gpr4	Plekhg2
Ighv14.1	Ganab	Dennd1c	Osbpl5
		Lsr	Wdtc1
Ighv14.3	Gas2l1	Gm27032	Kcnk2
		Ggact	Slc20a2
Ighv2.9.1	Gas7	Prkcz	Ahdc1
		Ccdc9b	Fermt2
Ighv5.16	Gas8	Glipr1	N4bp2
		Fgr	D630003M21Rik
Ighv6.3	Gbf1	Lpar6	Dusp8
		Jaml	Rara
Ighv7.3	Gcn1	Bcl2	Socs1
		Rnf43	Fkbp14
Ighv8.12	Gdf11	Lrrc8d	Cdon
		Cap2	Pde4dip
Ighv8.8	Gdi1	Cpne9	Tlcd2
		Igkv10.94	Gask1a
Igkv1.122	Gdpd5	Lepr	Sobp
		Clec12a	Spats2l
Igkv12.46	Gga2	Plin4	Satb2
		Ttyh1	Sgsm2
Igkv13.84	Ggcx	Akap6	Ankrd35
		Siglec1	Lasp1
Igkv14.126	Ggh	Gm26704	Trp53inp2
		Ms4a6b	Setd1b
Igkv17.121	Gjb2	Bmp6	Olfml2b
		Tnfsf8	Ptov1
Igkv19.93	Gjc1	Fdft1	Rgs4
		Abcb1b	Atf5
Igkv3.1	Glmp	Prok2	Cul7
		Slc22a2	Fndc4
Igkv3.4	Glrx3	Ostm1	Shank1
		Slfn5	Lmx1b
Igkv4.57	Gm15564	Gm44421	Ost4
		Cmpk2	Rap1gap2
Igkv4.72	Gm20619	Csf2rb2	Zfhx3
		Lrrc2	Ppp1r9b
Igkv6.14	Gm2415	Gm5127	Zfp503
		Gsta3	Chad
Igkv6.23	Gm24187	Ctxn3	En2
		Uchl1	Whrn
Igkv8.24	Gm31727	Gm49769	Runx2
		Spink4	Dap
Igkv8.30	Gm3294	Mro	Sec24d
		Ackr2	Lgi2
Il10ra	Gm47480	Srsf5	Prrc2b
		C1ra	Fut11
Il13ra1	Gm7162	Gm17019	Hlx
		Cd3e	Prss23
Il1r1	Gm7536	Slco2b1	Prrx2
		Creg2	Tnrc18
Impact	Gm7694	Tubb1	Nrtn
		Soat1	Dse
Irs1	Gmppb	Rgs2	Vasn
		Mogat1	Cercam
Itga4	Gna11	Il2rg	Fgl2
		F10	Clstn1
Itih3	Gnai2	Ceacam1	Klhl42
		Fcer1g	Kcns1
Itk	Gnat2	Slc43a3	Daam2
		Alox12	Map3k10
Itm2c	Gnb3	Cytip	Mar9
		Ighv4.1	Zfp609
Kcne4	Gns	Kbtbd11	Pitpnm3
		Gm15222	Aipl1
Kcnip2	Got1	Flt3	Col16a1
		Oosp1	Iqsec3
Kcnip3	Got2	Ighv1.76	Six5
		Htt	Szrd1
Kcnt2	Gpat4	Lao1	Atp1a3
		Lrp8	Arhgef10l
Kdm5a	Gpx6	Igkv8.21	Igsf21
		Fcrl5	Npnt
Khk	Grasp	Myo18b	Elmo1
		Tmem154	Ccdc8
Kif26b	Gse1	Abcg2	Atp1b2
		Dpp4	Rap1gap
Kif4	Gsn	Ccdc88c	B4galnt3
		Edn1	Mdfic
Kit	Gspt1	Nos3	Fmod
		Lgals3bp	Coro2b
Klk10	Gtf2i	Sult1c1	Kirrel
		Chrnb4	Rnf10
Klk14	Gtf3c1	Gpr55	Tcf20
		Uimc1	Shisa4
Klk8	Gucy2f	Pou2f2	Lman1
		Mfsd2b	Fam222a
Krt15	Guk1	Ctps	Zbed3
		A630001G21Rik	Kdm5b
Lacc1	Gzmd	BC051142	Ctf1
		Nrcam	Fbrs
Lamb3	Gzme	Il9r	Mfap4
		Igkv8.28	Tbc1d8b
Lamc2	Hadha	Ighv1.42	Pwwp3b
		Napsa	Sem1
Lat	Hapln4	Zc3h12d	Kcna4
		Ankrd12	Shc1
Lcn2	Hcfc1	Shisa9	Tceal9
		Tlr13	Trim46
Lgals3	Hcn2	Sigirr	Gpr153
		Cox8b	Snai1
Lgals4	Hdgf	H2.K2	Nrep
		Slc7a2	Sbk1
Lgals9	Hdlbp	Mgst1	Hic1
		X2210039B01Rik	Elfn2
Lgmn	Hexim1	Piwil4	Mdga1
		Grtp1	Ecm2
Lhx8	Hgs	Ighv14.2	Adamts3
		Gdpd2	Prr33
Lilrb4a	Higd2a	Atp10d	Zmym1
		Mpped1	Cilp2
Lin28b	Hivep3	Igkv4.74	Irf2bp1
		Slc2a3	Trp53i13
Lmntd1	Hk1	Dgat2	Aplnr
		Setdb2	Sptssa
Lmo2	Hmg20b	Rorb	Shisa2
		Pamr1	X2510039O18Rik
Lmo4	Hmgn1	Prxl2a	Dact1
		Gm5547	Tceal3
Lrrn4cl	Hnrnpab	Slc13a4	Zbtb7c
		Klra2	Zfp354c
Ltb4r1	Hnrnpm	Asic2	Shb
		Dpysl5	H1f10
Lurap1l	Hnrnpul1	Gm18342	Ubtd2
		Mfap5	Med26
Ly6g	Hnrnpul2	Ank3	Adra2c
		Ifi206	Dipk2a
Ly86	Hps4	C3	Pou3f3
		Hap1	Penk
Lyz1	Hrk	Parp14	Pid1
		Slamf7	Col27a1
Mad2l2	Hs6st2	Lfng	Basp1
		Ncf1	Ifitm10
Malsu1	Hsp90b1	Sh2d2a	Slitrk6
		Bmp8a	B3gat1
Malt1	Hspa12b	Slc22a3	Hs3st2
		Fgfbp3	Cmtr2
Maoa	Hspa4	Stk33	C1qtnf2
		Apobec3	Zfp319
Mar1	Hspa4l	Slc20a1	Prr12
		Itgam	Ddit4l
Mar2	Hspa5	Nampt	Slc39a3
		Wnt9b	Ckap4
Mar6	Hspa8	Coro2a	Ankrd33
		Iglv3	Samd14
Mar7	Hspd1	Lyn	Gap43
		Fcrla	Kcne4
Mcoln2	Hsph1	Zfp941	Gm973
		Clec4d	Adamts12
Mctp1	Iars	Acsm4	Flrt1
		Gbp5	Pygo2
Mecom	Igfals	Abcc1	Ldlrad3
		Elane	Tenm4
Mgst2	Ilrun	Auh	Col6a3
		Bend6	Frmd6
Mid1ip1	Inf2	Spi1	Omd
		Slc10a6	Fam171b
Mill2	Inka2	Pik3r5	Mlec
		Ms4a4c	Igf2
Milr1	Inppl1	Dock2	Nog
		Igsf6	Mex3d
Mipol1	Ins2	Cldn5	Insc
		Tlx2	Rnf24
Mir100hg	Insyn1	Ddx25	Efna5
		Lhfpl5	Tada3
Mir99ahg	Ints1	Tnr	Agtr1a
		Cd300lf	Lix1l
Mirt1	Ints3	Sh2d6	Prokr1
		Stmn2	Cdc42ep1
Mllt3	Intu	Cxcr4	Pheta2
		Rasd2	Armcx4
Mmp25	Iqsec2	Cxcr2	Lrrc4
		Csf3r	Shisa3
Mocos	Irf2bpl	Syt5	Sarm1
		Nkg7	Il17d
Mrps9	Irgq	Plscr1	Fzd2
		Adrb2	Adra1b
Ms4a2	Islr	Mx2	Vstm4
		Rasal3	Emilin3
Ms4a4a	Isoc2a	Arhgdib	Fam131a
		Tfap2b	Zfp623
Ms4a7	Itga3	Itga2b	Gja1
		Serpina3f	Selenon
Mtmr14	Itga6	Aanat	Gprc5c
		Pla2g4a	P4ha3
Mtx3	Itga7	Apol10b	Bzw1
		H2.Eb1	Pcdh1
Muc20	Itga9	Stat2	Irf2bp2
		Psd4	Mical3
Myb	Itgb5	Bche	Pcbp1
		Cd163l1	Mest
Mylf.ps	Itih5	Scn3b	Ostn
		Icam1	Lrrc15
Myo1h	Itpkb	Slc9a2	Mpp3
		Cd14	Robo2
Myom1	Itpr1	Ampd3	Nrk
		Cyp27a1	Rnf157
Naaa	Jade2	Naaladl1	C130021I20Rik
		Cp	Gas1
Nadk2	Jdp2	Igkv14.130	Cyp2f2
		Cdh15	X2700081O15Rik
Ncf4	Josd2	Hdhd3	Ebf4
		Nfkbiz	Sh3pxd2a
Nemf	Jph4	Gm44829	Dusp7
		Gimap8	Mat2a
Neurod1	Jup	Lcp1	Cyhr1
		Phf11d	Cthrc1
Neurod4	Kazn	Lilra5	Fgfr3
		Dock5	Msi1
Nexn	Kcne2	Ctnna1	P2ry10b
		Plekhh2	Bsx
Nfkbia	Kcnj14	Gm12185	Rhob
		B130024G19Rik	Tle5
Ngp	Kcnq4	mt.Co1	Adam12
		Gm35572	Tmem119
Nmnat3	Kctd11	Aldh1a1	Nfic
		Cbx7	Klf2
Nqo1	Kctd17	Fmo6	Sertad3
		Ighv1.63	Fat2
Nr3c2	Kdm4a	Srrm2	Maf
		Miat	Pprc1
Nrxn2	Kif1c	Gbp9	Hmcn2
		Clu	Gpc3
Nxpe5	Klf13	Col9a2	Rras2
		Adcy1	Rtl6
Nyx	Krt2	Hrct1	Tmem150a
		Rabepk	St3gal5
Oard1	Krt75	Gm9758	Col8a2
		Ighv1.74	Pard6g
Ofd1	Ksr1	Ighg3	Myh1
		Rab44	Cd248
Ogfrl1	L3mbtl3	Csf2rb	Gulp1
		Adamts8	Ado
Olfr920	Lama3	Gdf3	Gsk3a
		Parp10	Megf6
Otulinl	Lamc1	Igkv12.98	Sep11
		Sox17	Palld
P2rx7	Laptm4a	Pla1a	Adamts17
		Syn2	Smco4
P2ry10	Larp1	Hpse	Tspan7
		Igkv4.91	Upf1
Pacsin3	Letm1	Ubd	Thra
		Slc16a12	Kcp
Padi1	Lgr6	Crlf1	Slc27a4
		Tbx1	Eda
Padi3	Lhfp	Tedc2	Actg2
		Klf5	Gckr
Padi4	Lhx4	Sirpb1c	Kmt5c
		Ighv2.9	Dsc3
Padi6	Lingo3	Il1r2	Nptx2
		Lrrc8b	Atxn7l3
Pafah1b3	Llgl1	Clec2d	Slc35e3
		Gm12250	Sp7
Pak3	Lman1l	Inpp5d	Samd5
		A530030E21Rik	Tnfrsf19
Parp12	Lman2	Car14	Mfap2
		Ifi208	Atp8b2
Paxx	Lmf2	Acr	Bloc1s4
		Cyp4v3	Tmem263
Pbld1	Loxl3	Rin1	Retnla
		Ighv10.3	Ssbp3
Pcdh17	Lrfn2	Cep85	Actg1
		X1700030C10Rik.1	Clip2
Pcdha1	Lrig1	Dixdc1	Numbl
		Rasgef1b	Grm4
Pcdhb14	Lrit1	Il18r1	Bcl9l
		Irs2	Gng8
Pcgf5	Lrp1	Msi2	Slc24a3
		Pde5a	Hmcn1
Pcsk4	Lrp10	Slc7a14	Capn6
		Aim2	Pi15
Pde9a	Lrp3	Serpinb6b	Myl9
		Arhgef37	Tcf15
Pdgfd	Lrrc59	Cxadr	Col8a1
		Crybg1	Zfp467
Pdk1	Lrrn2	Gm30571	Myadm
		Igkv13.85	Marcks
Pfkfb3	Lsp1	Sema3e	Slc47a2
		Cacnb2	B3gnt9
Pfn2	Ltbp1	Sytl4	Fat1
		Uhrf1bp1l	Scn2b
Pgm5	Ltbp4	H2.Ab1	Serpinh1
		Itgb2l	Slc17a7
Phip	Ltbr	Chd7	Mn1
		Gm8369	Lactbl1
Phka2	Lum	Abca7	Tmem200b
		Rogdi	Pnmal2
Phldb2	Lynx1	Soat2	Cited4
		Dock9	Syndig1l
Pik3cg	Lzts2	Mal	B3gat3
		Adh7	Fndc1
Pilra	Mall	Nxpe3	Cep170b
		Prnp	Prr16
Pkhd1l1	Maml1	Il12rb1	Il11ra1
		Vwf	Rbm15b
Pkp3	Manf	Ephx1	Bglap
		Rhou	Bglap2
Pla2g2d	Map1a	Pcare	Fat3
		Ipcef1	Chst14
Pla2r1	Map1s	Paics	Pde11a
		Grik3	Gm23935
Pld4	Map3k12	Ikzf1	Gm24270
		Pan2	Ighv7.1
Plgrkt	Map3k5	Phf11c	Nrarp
		Rab19	Foxd1
Plin2	Map4	Lmbr1l	Dact3
		Nmb	Col22a1
Plk3	Map4k4	Slc2a4	Slc8a3
		Enpp1	Kdelr2
Pls1	Mapk8ip1	Slc1a5	Gm14597
		Saraf	H3c15
Pmaip1	Mapre3	Bcap29	Brip1os
		Ccl2	Zfp703
Pnck	Mark2	Adcy5	Susd5
		Scara3	C430049B03Rik
Pnma2	Marveld1	Zwint	Zfp111
		Zfyve28	Tmem250.ps
Polr3gl	Mast2	Kcnmb2	Cbx6
		Gm38299	Ier5l
Pparg	Mast4	Syt7	Gm16574
		Psmb9	Cdk5r2
Ppbp	Mbd3	Sptlc2	Srpx
		Afm	Myl6
Ppcdc	Mboat2	Hoxb4	Hspa1b
		Ndnf	Col6a5
Ppl	Mcam	X5830411N06Rik	Asmt
		Bbox1	Lrit3
Ppp1r12b	Mcf2l	Mapk11	Gm21887
		F7	H1f0
Ppp1r14c	Med15	Ighv9.1	Snhg18
		Nudt16	Gm26917
Ppp1r3c	Med24	Vrk1	Gm10535
		Zfp385b	Ptprv
Ppp2r3a	Med25	Entpd1	Pcdhgc3
		Itgax	Gm43618
Ppp4r1l.ps	Megf8	Usp54	Gm42517
		Igkv6.32	Gm43610
Prg4	Metrn	Adh1	Zfp862.ps
		Lpxn	Samd4b
Prkag3	Mettl3	Cyb5r3	D030045P18Rik
		Ms4a6d	Gm47887
Prkar1b	Mfn2	Grrp1	Ntn3
		Irgm1
Prkcb	Mgat1	Gpr182
		Slc25a28
Prpf40a	Mgl2	Ptk2b
		Serpina1b
Prune2	Mgp	Sncg
		Nt5c1a
Prxl2b	Micall1	Hck
